# Supplementary material for: Abnormal Gait Behavior Detection for Elderly Based on Enhanced Wigner-Ville Analysis and Cloud Incremental SVM Learning
Source: Hindawi journal article supplement (doi:10.1155/2016/5869238), 2016-01-01
Supplement: f1 [file 5869238.f1.zip]

Archive with 217 entries (196 files):
- Supplementary Materials/
- Supplementary Materials/demo frames/
- Supplementary Materials/demo frames/Backward Fall.png
- Supplementary Materials/demo frames/Forward Fall.png
- Supplementary Materials/demo frames/RightWard Fall.png
- Supplementary Materials/MP decomposition process/
- Supplementary Materials/MP decomposition process/ICPNow1.emf
- Supplementary Materials/MP decomposition process/ICPNow10.emf
- Supplementary Materials/MP decomposition process/ICPNow11.emf
- Supplementary Materials/MP decomposition process/ICPNow12.emf
- Supplementary Materials/MP decomposition process/ICPNow13.emf
- Supplementary Materials/MP decomposition process/ICPNow14.emf
- Supplementary Materials/MP decomposition process/ICPNow15.emf
- Supplementary Materials/MP decomposition process/ICPNow16.emf
- Supplementary Materials/MP decomposition process/ICPNow17.emf
- Supplementary Materials/MP decomposition process/ICPNow18.emf
- Supplementary Materials/MP decomposition process/ICPNow19.emf
- Supplementary Materials/MP decomposition process/ICPNow2.emf
- Supplementary Materials/MP decomposition process/ICPNow20.emf
- Supplementary Materials/MP decomposition process/ICPNow21.emf
- Supplementary Materials/MP decomposition process/ICPNow3.emf
- Supplementary Materials/MP decomposition process/ICPNow4.emf
- Supplementary Materials/MP decomposition process/ICPNow5.emf
- Supplementary Materials/MP decomposition process/ICPNow6.emf
- Supplementary Materials/MP decomposition process/ICPNow7.emf
- Supplementary Materials/MP decomposition process/ICPNow8.emf
- Supplementary Materials/MP decomposition process/ICPNow9.emf
- Supplementary Materials/MP decomposition process/Thumbs.db
- Supplementary Materials/Original Data/
- Supplementary Materials/Original Data/Backward fall Ending  Lying/
- Supplementary Materials/Original Data/Backward fall Ending  Lying/original__100.txt
- Supplementary Materials/Original Data/Backward fall Ending  Lying/original__91.txt
- Supplementary Materials/Original Data/Backward fall Ending  Lying/original__92.txt
- Supplementary Materials/Original Data/Backward fall Ending  Lying/original__93.txt
- Supplementary Materials/Original Data/Backward fall Ending  Lying/original__94.txt
- Supplementary Materials/Original Data/Backward fall Ending  Lying/original__95.txt
- Supplementary Materials/Original Data/Backward fall Ending  Lying/original__96.txt
- Supplementary Materials/Original Data/Backward fall Ending  Lying/original__97.txt
- Supplementary Materials/Original Data/Backward fall Ending  Lying/original__98.txt
- Supplementary Materials/Original Data/Backward fall Ending  Lying/original__99.txt
- Supplementary Materials/Original Data/Backward fall Ending sitting/
- Supplementary Materials/Original Data/Backward fall Ending sitting/original__81.txt
- Supplementary Materials/Original Data/Backward fall Ending sitting/original__82.txt
- Supplementary Materials/Original Data/Backward fall Ending sitting/original__83.txt
- Supplementary Materials/Original Data/Backward fall Ending sitting/original__84.txt
- Supplementary Materials/Original Data/Backward fall Ending sitting/original__85.txt
- Supplementary Materials/Original Data/Backward fall Ending sitting/original__86.txt
- Supplementary Materials/Original Data/Backward fall Ending sitting/original__87.txt
- Supplementary Materials/Original Data/Backward fall Ending sitting/original__88.txt
- Supplementary Materials/Original Data/Backward fall Ending sitting/original__89.txt
- Supplementary Materials/Original Data/Backward fall Ending sitting/original__90.txt
- Supplementary Materials/Original Data/Backward fall With recovery/
- Supplementary Materials/Original Data/Backward fall With recovery/original__101.txt
- Supplementary Materials/Original Data/Backward fall With recovery/original__102.txt
- Supplementary Materials/Original Data/Backward fall With recovery/original__103.txt
- Supplementary Materials/Original Data/Backward fall With recovery/original__104.txt
- Supplementary Materials/Original Data/Backward fall With recovery/original__105.txt
- Supplementary Materials/Original Data/Backward fall With recovery/original__106.txt
- Supplementary Materials/Original Data/Backward fall With recovery/original__107.txt
- Supplementary Materials/Original Data/Backward fall With recovery/original__108.txt
- Supplementary Materials/Original Data/Backward fall With recovery/original__109.txt
- Supplementary Materials/Original Data/Backward fall With recovery/original__110.txt
- Supplementary Materials/Original Data/Climbing three steps/
- Supplementary Materials/Original Data/Climbing three steps/original__31.txt
- Supplementary Materials/Original Data/Climbing three steps/original__32.txt
- Supplementary Materials/Original Data/Climbing three steps/original__33.txt
- Supplementary Materials/Original Data/Climbing three steps/original__34.txt
- Supplementary Materials/Original Data/Climbing three steps/original__35.txt
- Supplementary Materials/Original Data/Climbing three steps/original__36.txt
- Supplementary Materials/Original Data/Climbing three steps/original__37.txt
- Supplementary Materials/Original Data/Climbing three steps/original__38.txt
- Supplementary Materials/Original Data/Climbing three steps/original__39.txt
- Supplementary Materials/Original Data/Climbing three steps/original__40.txt
- Supplementary Materials/Original Data/Forward fall Ending lying flat/
- Supplementary Materials/Original Data/Forward fall Ending lying flat/original__61.txt
- Supplementary Materials/Original Data/Forward fall Ending lying flat/original__62.txt
- Supplementary Materials/Original Data/Forward fall Ending lying flat/original__63.txt
- Supplementary Materials/Original Data/Forward fall Ending lying flat/original__64.txt
- Supplementary Materials/Original Data/Forward fall Ending lying flat/original__65.txt
- Supplementary Materials/Original Data/Forward fall Ending lying flat/original__66.txt
- Supplementary Materials/Original Data/Forward fall Ending lying flat/original__67.txt
- Supplementary Materials/Original Data/Forward fall Ending lying flat/original__68.txt
- Supplementary Materials/Original Data/Forward fall Ending lying flat/original__69.txt
- Supplementary Materials/Original Data/Forward fall Ending lying flat/original__70.txt
- Supplementary Materials/Original Data/Forward fall Ending on the knees/
- Supplementary Materials/Original Data/Forward fall Ending on the knees/original__51.txt
- Supplementary Materials/Original Data/Forward fall Ending on the knees/original__52.txt
- Supplementary Materials/Original Data/Forward fall Ending on the knees/original__53.txt
- Supplementary Materials/Original Data/Forward fall Ending on the knees/original__54.txt
- Supplementary Materials/Original Data/Forward fall Ending on the knees/original__55.txt
- Supplementary Materials/Original Data/Forward fall Ending on the knees/original__56.txt
- Supplementary Materials/Original Data/Forward fall Ending on the knees/original__57.txt
- Supplementary Materials/Original Data/Forward fall Ending on the knees/original__58.txt
- Supplementary Materials/Original Data/Forward fall Ending on the knees/original__59.txt
- Supplementary Materials/Original Data/Forward fall Ending on the knees/original__60.txt
- Supplementary Materials/Original Data/Forward fall With recovery/
- Supplementary Materials/Original Data/Forward fall With recovery/original__71.txt
- Supplementary Materials/Original Data/Forward fall With recovery/original__72.txt
- Supplementary Materials/Original Data/Forward fall With recovery/original__73.txt
- Supplementary Materials/Original Data/Forward fall With recovery/original__74.txt
- Supplementary Materials/Original Data/Forward fall With recovery/original__75.txt
- Supplementary Materials/Original Data/Forward fall With recovery/original__76.txt
- Supplementary Materials/Original Data/Forward fall With recovery/original__77.txt
- Supplementary Materials/Original Data/Forward fall With recovery/original__78.txt
- Supplementary Materials/Original Data/Forward fall With recovery/original__79.txt
- Supplementary Materials/Original Data/Forward fall With recovery/original__80.txt
- Supplementary Materials/Original Data/Leftward fall Ending lying/
- Supplementary Materials/Original Data/Leftward fall Ending lying/original__111.txt
- Supplementary Materials/Original Data/Leftward fall Ending lying/original__112.txt
- Supplementary Materials/Original Data/Leftward fall Ending lying/original__113.txt
- Supplementary Materials/Original Data/Leftward fall Ending lying/original__114.txt
- Supplementary Materials/Original Data/Leftward fall Ending lying/original__115.txt
- Supplementary Materials/Original Data/Leftward fall Ending lying/original__116.txt
- Supplementary Materials/Original Data/Leftward fall Ending lying/original__117.txt
- Supplementary Materials/Original Data/Leftward fall Ending lying/original__118.txt
- Supplementary Materials/Original Data/Leftward fall Ending lying/original__119.txt
- Supplementary Materials/Original Data/Leftward fall Ending lying/original__120.txt
- Supplementary Materials/Original Data/Leftward fall Ending recovery/
- Supplementary Materials/Original Data/Leftward fall Ending recovery/original__121.txt
- Supplementary Materials/Original Data/Leftward fall Ending recovery/original__122.txt
- Supplementary Materials/Original Data/Leftward fall Ending recovery/original__123.txt
- Supplementary Materials/Original Data/Leftward fall Ending recovery/original__124.txt
- Supplementary Materials/Original Data/Leftward fall Ending recovery/original__125.txt
- Supplementary Materials/Original Data/Leftward fall Ending recovery/original__126.txt
- Supplementary Materials/Original Data/Leftward fall Ending recovery/original__127.txt
- Supplementary Materials/Original Data/Leftward fall Ending recovery/original__128.txt
- Supplementary Materials/Original Data/Leftward fall Ending recovery/original__129.txt
- Supplementary Materials/Original Data/Leftward fall Ending recovery/original__130.txt
- Supplementary Materials/Original Data/Leftward fall With recovery/
- Supplementary Materials/Original Data/Leftward fall With recovery/original__141.txt
- Supplementary Materials/Original Data/Leftward fall With recovery/original__142.txt
- Supplementary Materials/Original Data/Leftward fall With recovery/original__143.txt
- Supplementary Materials/Original Data/Leftward fall With recovery/original__144.txt
- Supplementary Materials/Original Data/Leftward fall With recovery/original__145.txt
- Supplementary Materials/Original Data/Leftward fall With recovery/original__146.txt
- Supplementary Materials/Original Data/Leftward fall With recovery/original__147.txt
- Supplementary Materials/Original Data/Leftward fall With recovery/original__148.txt
- Supplementary Materials/Original Data/Leftward fall With recovery/original__149.txt
- Supplementary Materials/Original Data/Leftward fall With recovery/original__150.txt
- Supplementary Materials/Original Data/Lying on a bed then standing/
- Supplementary Materials/Original Data/Lying on a bed then standing/original__41.txt
- Supplementary Materials/Original Data/Lying on a bed then standing/original__42.txt
- Supplementary Materials/Original Data/Lying on a bed then standing/original__43.txt
- Supplementary Materials/Original Data/Lying on a bed then standing/original__44.txt
- Supplementary Materials/Original Data/Lying on a bed then standing/original__45.txt
- Supplementary Materials/Original Data/Lying on a bed then standing/original__46.txt
- Supplementary Materials/Original Data/Lying on a bed then standing/original__47.txt
- Supplementary Materials/Original Data/Lying on a bed then standing/original__48.txt
- Supplementary Materials/Original Data/Lying on a bed then standing/original__49.txt
- Supplementary Materials/Original Data/Lying on a bed then standing/original__50.txt
- Supplementary Materials/Original Data/Normal walking/
- Supplementary Materials/Original Data/Normal walking/original__1.txt
- Supplementary Materials/Original Data/Normal walking/original__10.txt
- Supplementary Materials/Original Data/Normal walking/original__2.txt
- Supplementary Materials/Original Data/Normal walking/original__3.txt
- Supplementary Materials/Original Data/Normal walking/original__4.txt
- Supplementary Materials/Original Data/Normal walking/original__5.txt
- Supplementary Materials/Original Data/Normal walking/original__6.txt
- Supplementary Materials/Original Data/Normal walking/original__7.txt
- Supplementary Materials/Original Data/Normal walking/original__8.txt
- Supplementary Materials/Original Data/Normal walking/original__9.txt
- Supplementary Materials/Original Data/Rightward fall Ending lying/
- Supplementary Materials/Original Data/Rightward fall Ending lying/original__131.txt
- Supplementary Materials/Original Data/Rightward fall Ending lying/original__132.txt
- Supplementary Materials/Original Data/Rightward fall Ending lying/original__133.txt
- Supplementary Materials/Original Data/Rightward fall Ending lying/original__134.txt
- Supplementary Materials/Original Data/Rightward fall Ending lying/original__135.txt
- Supplementary Materials/Original Data/Rightward fall Ending lying/original__136.txt
- Supplementary Materials/Original Data/Rightward fall Ending lying/original__137.txt
- Supplementary Materials/Original Data/Rightward fall Ending lying/original__138.txt
- Supplementary Materials/Original Data/Rightward fall Ending lying/original__139.txt
- Supplementary Materials/Original Data/Rightward fall Ending lying/original__140.txt
- Supplementary Materials/Original Data/Sitting on a chair then standing/
- Supplementary Materials/Original Data/Sitting on a chair then standing/original__11.txt
- Supplementary Materials/Original Data/Sitting on a chair then standing/original__12.txt
- Supplementary Materials/Original Data/Sitting on a chair then standing/original__13.txt
- Supplementary Materials/Original Data/Sitting on a chair then standing/original__14.txt
- Supplementary Materials/Original Data/Sitting on a chair then standing/original__15.txt
- Supplementary Materials/Original Data/Sitting on a chair then standing/original__16.txt
- Supplementary Materials/Original Data/Sitting on a chair then standing/original__17.txt
- Supplementary Materials/Original Data/Sitting on a chair then standing/original__18.txt
- Supplementary Materials/Original Data/Sitting on a chair then standing/original__19.txt
- Supplementary Materials/Original Data/Sitting on a chair then standing/original__20.txt
- Supplementary Materials/Original Data/Slipping against a wall ending in sitting position/
- Supplementary Materials/Original Data/Slipping against a wall ending in sitting position/original__161.txt
- Supplementary Materials/Original Data/Slipping against a wall ending in sitting position/original__162.txt
- Supplementary Materials/Original Data/Slipping against a wall ending in sitting position/original__163.txt
- Supplementary Materials/Original Data/Slipping against a wall ending in sitting position/original__164.txt
- Supplementary Materials/Original Data/Slipping against a wall ending in sitting position/original__165.txt
- Supplementary Materials/Original Data/Slipping against a wall ending in sitting position/original__166.txt
- Supplementary Materials/Original Data/Slipping against a wall ending in sitting position/original__167.txt
- Supplementary Materials/Original Data/Slipping against a wall ending in sitting position/original__168.txt
- Supplementary Materials/Original Data/Slipping against a wall ending in sitting position/original__169.txt
- Supplementary Materials/Original Data/Slipping against a wall ending in sitting position/original__170.txt
- Supplementary Materials/Original Data/Squatting/
- Supplementary Materials/Original Data/Squatting/original__21.txt
- Supplementary Materials/Original Data/Squatting/original__22.txt
- Supplementary Materials/Original Data/Squatting/original__23.txt
- Supplementary Materials/Original Data/Squatting/original__24.txt
- Supplementary Materials/Original Data/Squatting/original__25.txt
- Supplementary Materials/Original Data/Squatting/original__26.txt
- Supplementary Materials/Original Data/Squatting/original__27.txt
- Supplementary Materials/Original Data/Squatting/original__28.txt
- Supplementary Materials/Original Data/Squatting/original__29.txt
- Supplementary Materials/Original Data/Squatting/original__30.txt
- Supplementary Materials/Original Data/Stumbling without fall/
- Supplementary Materials/Original Data/Stumbling without fall/original__151.txt
- Supplementary Materials/Original Data/Stumbling without fall/original__152.txt
- Supplementary Materials/Original Data/Stumbling without fall/original__153.txt
- Supplementary Materials/Original Data/Stumbling without fall/original__154.txt
- Supplementary Materials/Original Data/Stumbling without fall/original__155.txt
- Supplementary Materials/Original Data/Stumbling without fall/original__156.txt
- Supplementary Materials/Original Data/Stumbling without fall/original__157.txt
- Supplementary Materials/Original Data/Stumbling without fall/original__158.txt
- Supplementary Materials/Original Data/Stumbling without fall/original__159.txt
- Supplementary Materials/Original Data/Stumbling without fall/original__160.txt
- Supplementary Materials/Supplementary_Materials.doc
