# Supplementary material for: Abnormal Gait Behavior Detection for Elderly Based on Enhanced Wigner-Ville Analysis and Cloud Incremental SVM Learning
Source: Hindawi journal article supplement (doi:10.1155/2016/5869238), 2016-01-01
Supplement: f1 [file 5869238.f1.zip › Supplementary Materials/Original Data/Backward fall Ending Lying/original__93.txt]

# Accelerometer Values
# filename:  original__93.txt
# Saving start time: Thu Feb 26 20:34:54 GMT+08:00 2015

# sensor resolution: 0.0095825195m/s^2
#Sensorvendor: KIONIX, name: KX023 Accelerometer, type: 1,version : 1, range 39.240005

# X value, Y value, Z value, time diff in ms
-0.229 0.006 -0.395 6
0.194 -0.093 -0.406 10
0.175 -0.084 -0.365 9
0.292 -0.109 -0.25 8
0.336 -0.114 -0.154 9
0.298 -0.102 -0.086 8
0.16 -0.08 -0.044 8
-0.05 -0.059 -0.018 9
-0.045 -0.053 -0.016 8
-0.214 -0.034 0.002 9
-0.281 -0.004 0.033 8
-0.162 0.073 0.127 8
-0.038 -0.053 0.112 7
-0.109 -0.316 0.014 10
-0.178 -0.349 0.085 9
-0.161 -0.314 0.077 8
-0.059 -0.287 0.205 8
0.136 -0.321 0.23 9
0.24 -0.318 0.172 8
0.221 -0.221 0.083 9
0.152 -0.084 0.02 8
0.091 -0.016 -0.014 8
0.082 -0.014 -0.013 9
0.032 -0.033 -0.062 8
-0.039 -0.12 -0.123 7
-0.13 -0.208 -0.166 10
-0.208 -0.249 -0.177 8
-0.26 -0.256 -0.159 9
-0.277 -0.25 -0.138 8
-0.249 -0.225 -0.124 8
-0.243 -0.215 -0.11 9
-0.225 -0.196 -0.108 8
-0.199 -0.175 -0.102 9
-0.167 -0.161 -0.1 8
-0.146 -0.146 -0.121 8
-0.17 -0.131 -0.176 9
-0.153 -0.118 -0.158 6
-0.288 -0.107 -0.213 11
-0.282 -0.093 -0.152 8
-0.358 -0.138 -0.192 8
-0.691 -0.161 -0.301 9
-0.869 -0.126 -0.176 8
-0.782 -0.113 -0.158 9
-0.819 -0.161 -0.105 8
-0.801 -0.226 -0.274 8
-0.742 -0.286 -0.506 9
-0.672 -0.374 -0.812 8
-0.606 -0.393 -1.189 8
-0.545 -0.353 -1.07 7
-0.482 -0.326 -1.369 10
-0.376 -0.344 -1.466 9
-0.209 -0.43 -1.35 8
0.021 -0.56 -1.046 8
0.308 -0.698 -0.656 9
0.504 -0.88 -0.422 8
0.642 -1.113 -0.53 9
0.578 -1.002 -0.477 8
0.782 -1.164 -0.691 8
0.928 -1.191 -0.74 9
0.94 -1.161 -0.68 8
0.91 -1.114 -0.553 7
0.922 -1.086 -0.347 10
0.96 -1.103 -0.131 8
0.864 -0.993 -0.118 9
0.845 -0.944 -0.051 8
0.643 -0.821 -0.248 9
0.28 -0.8 -0.56 8
-0.072 -0.866 -0.89 8
-0.326 -0.86 -1.171 9
-0.402 -0.789 -1.254 8
-0.362 -0.71 -1.129 8
-0.276 -0.656 -1.029 9
-0.107 -0.596 -0.823 7
0.106 -0.521 -0.809 10
0.3 -0.493 -1.119 8
0.421 -0.547 -1.565 8
0.379 -0.567 -2.117 9
0.381 -0.51 -1.905 8
0.336 -0.459 -2.473 9
0.35 -0.31 -2.767 8
0.371 -0.051 -2.707 8
0.215 0.373 -2.28 9
-0.148 1.082 -1.308 8
-0.133 0.974 -1.177 9
-0.541 1.867 0.097 6
-0.809 2.714 1.24 10
-0.662 3.173 2.003 9
-0.092 2.975 2.272 8
0.658 2.201 2.25 9
1.308 1.364 2.191 8
1.177 1.228 1.971 8
1.366 0.792 2.161 9
0.955 0.647 2.548 8
0.224 0.595 3.092 9
-0.451 0.77 3.566 8
-0.641 1.146 3.613 8
-0.577 1.031 3.252 7
-0.136 1.291 2.777 10
0.616 1.347 1.994 9
1.371 1.299 1.652 8
1.823 1.163 2.032 8
1.838 0.943 3.019 9
1.675 0.762 4.464 8
1.652 0.65 5.365 8
1.486 0.585 4.829 9
1.874 0.572 4.854 8
2.598 0.588 4.444 9
3.26 0.515 3.756 8
3.552 0.435 3.182 7
3.44 0.463 2.919 10
3.065 0.613 2.608 8
2.758 0.551 2.347 9
2.339 0.735 1.782 8
2.022 0.917 1.006 8
1.844 1.082 -0.062 9
1.67 1.155 -1.083 8
1.354 1.133 -1.53 9
1.219 1.019 -1.377 8
0.905 0.972 -1.244 8
0.788 0.863 -0.682 9
0.851 0.707 0.157 6
1.037 0.623 0.98 11
1.284 0.645 1.351 8
1.426 0.815 1.133 8
1.283 0.734 1.02 9
1.204 0.951 0.581 8
0.908 1.059 0.306 8
0.429 1.072 0.312 9
-0.2 1.046 0.697 8
-0.785 1.033 1.313 9
-1.045 0.999 1.714 8
-0.94 0.899 1.542 8
-0.762 0.845 1.561 7
-0.334 0.938 1.329 10
0.354 1.017 0.755 9
1.167 0.771 -0.243 8
1.43 0.487 -1.387 8
0.993 0.252 -2.464 9
0.893 0.226 -2.218 8
0.18 -0.05 -2.993 9
-0.506 -0.24 -3.093 8
-0.882 -0.37 -2.725 8
-0.727 -0.535 -2.422 9
-0.129 -0.775 -2.465 8
-0.116 -0.697 -2.218 7
0.526 -1.113 -2.723 10
0.892 -1.722 -3.646 8
0.782 -2.348 -4.782 9
0.16 -2.828 -5.7 8
-0.866 -2.933 -6.01 8
-2.009 -2.607 -5.597 9
-1.808 -2.346 -5.037 8
-2.519 -1.893 -4.233 9
-2.515 -1.496 -3.275 8
-1.857 -1.154 -2.402 8
-0.789 -0.839 -1.904 9
0.187 -0.576 -1.933 7
0.727 -0.332 -2.231 10
0.654 -0.299 -2.008 8
0.674 -0.145 -2.168 8
0.123 -0.025 -2.028 9
-0.79 0.218 -1.531 8
-1.604 0.567 -0.771 9
-1.909 0.891 -0.126 8
-1.6 1.061 0.048 8
-1.44 0.955 0.043 9
-0.895 1.002 -0.098 8
-0.634 1.051 -0.192 9
-0.829 1.128 -0.093 6
-1.318 1.191 0.178 10
-1.921 1.192 0.514 9
-2.504 1.218 1.033 8
-2.253 1.096 0.93 9
-2.61 1.237 1.721 8
-2.34 1.442 2.267 8
-1.32 1.527 2.085 9
-0.014 1.4 1.374 8
0.958 1.257 0.713 8
1.384 1.125 0.339 9
1.245 1.012 0.305 8
1.138 0.826 0.089 7
0.657 0.564 0.011 10
-0.115 0.383 0.012 8
-1.161 0.384 -0.05 9
-1.729 0.389 -0.281 8
-1.556 0.35 -0.253 9
-1.265 0.193 -0.688 8
-0.583 -0.025 -1.225 8
0.073 -0.158 -1.517 9
0.504 -0.318 -1.342 8
0.609 -0.49 -0.892 9
0.333 -0.484 -0.414 8
0.3 -0.436 -0.372 7
-0.179 -0.285 -0.077 10
-0.622 -0.069 0.04 8
-0.907 0.199 0.15 9
-0.928 0.425 0.393 8
-0.638 0.557 0.789 8
-0.076 0.541 1.21 9
-0.068 0.487 1.089 8
0.572 0.224 1.321 9
1.161 -0.108 1.223 8
1.567 -0.365 0.939 8
1.697 -0.593 0.59 9
1.57 -0.805 0.246 6
1.103 -0.912 -0.051 10
0.992 -0.821 -0.046 9
0.291 -0.778 -0.204 8
-0.305 -0.659 -0.021 9
-0.537 -0.442 0.483 8
-0.42 -0.182 0.979 8
-0.215 0.01 1.259 9
-0.053 0.005 1.548 8
-0.047 0.005 1.393 9
0.072 -0.263 1.805 8
0.06 -0.656 2.053 8
-0.267 -1.151 2.042 7
-0.647 -1.292 2.008 10
-0.796 -0.871 1.855 9
-0.716 -0.649 1.017 8
-0.645 -0.584 0.916 8
-0.925 -0.716 -0.38 9
-0.79 -0.906 -1.166 8
-0.563 -0.865 -1.128 9
-0.424 -0.461 -0.638 8
-0.451 -0.03 -0.112 8
-0.406 -0.027 -0.101 9
-0.286 0.296 0.267 8
0.118 0.479 0.642 7
0.495 0.288 0.847 10
0.745 -0.161 0.684 8
0.911 -0.457 0.46 9
0.851 -0.523 0.413 8
0.766 -0.471 0.372 8
0.308 -0.288 0.525 9
-0.488 0.009 0.642 8
-1.149 0.016 0.58 9
-1.34 -0.078 0.401 8
-1.243 0.101 0.066 8
-1.017 0.42 -0.471 9
-0.915 0.378 -0.424 7
-0.622 0.603 -1.21 10
-0.234 0.774 -1.957 8
0.083 1.154 -2.365 8
0.123 1.638 -2.537 9
0.002 1.901 -2.54 8
-0.092 1.852 -2.359 9
-0.083 1.667 -2.123 8
-0.119 1.319 -1.886 8
-0.244 0.918 -1.578 9
-0.462 0.655 -1.098 8
-0.642 0.391 -0.551 9
-0.718 0.17 -0.236 6
-0.724 0.088 -0.227 10
-0.652 0.079 -0.204 9
-0.579 0.038 -0.28 8
-0.412 0.078 -0.44 8
-0.218 0.216 -0.665 9
-0.105 0.305 -0.806 8
-0.133 0.338 -0.782 9
-0.26 0.33 -0.567 8
-0.234 0.297 -0.51 8
-0.412 0.208 -0.222 9
-0.528 0.009 -0.061 8
-0.655 -0.057 -0.136 7
-0.853 0.09 -0.303 10
-0.976 0.284 -0.44 8
-0.878 0.366 -0.527 9
-0.79 0.329 -0.474 8
-0.67 0.229 -0.499 9
-0.383 0.018 -0.382 8
-0.117 -0.207 -0.055 8
0.115 -0.4 0.28 9
0.354 -0.567 0.567 8
0.319 -0.51 0.51 9
0.507 -0.596 0.801 8
0.623 -0.574 0.885 7
0.742 -0.503 0.652 10
0.839 -0.399 0.294 8
0.867 -0.248 -0.092 9
0.829 -0.16 -0.456 8
0.746 -0.144 -0.41 8
0.646 -0.141 -0.618 9
0.415 -0.155 -0.666 8
0.059 -0.151 -0.565 8
-0.252 -0.118 -0.329 9
-0.396 -0.095 -0.125 8
-0.366 -0.129 0.049 9
-0.33 -0.116 0.044 6
-0.252 -0.117 0.316 10
-0.224 -0.015 0.624 9
-0.178 0.075 0.797 8
-0.033 0.224 0.788 9
0.207 0.414 0.666 8
0.456 0.47 0.535 8
0.411 0.423 0.481 9
0.563 0.375 0.519 8
0.598 0.288 0.683 9
0.591 0.163 0.788 8
0.577 0.079 0.762 8
0.519 0.071 0.686 7
0.528 0.187 0.311 10
0.476 0.168 0.28 9
0.515 0.163 0.009 8
0.588 0.12 -0.175 8
0.643 0.031 -0.305 9
0.55 -0.076 -0.44 8
0.322 -0.178 -0.524 8
0.29 -0.16 -0.455 9
0.047 -0.144 -0.409 8
-0.157 -0.305 -0.235 9
-0.225 -0.273 -0.053 8
-0.121 -0.174 -0.008 7
0.132 -0.08 -0.058 10
0.433 -0.029 -0.092 8
0.39 -0.026 -0.083 9
0.58 -0.024 -0.105 8
0.63 -0.014 -0.113 8
0.601 0.014 -0.11 9
0.493 0.052 -0.104 8
0.27 0.124 -0.097 9
0.026 0.21 -0.086 8
0.024 0.189 -0.078 8
-0.145 0.244 -0.069 9
-0.239 0.254 -0.063 7
-0.25 0.173 -0.041 10
-0.218 0.038 -0.003 8
-0.193 -0.08 0.02 8
-0.157 -0.214 0.057 9
-0.142 -0.193 0.051 8
-0.054 -0.309 0.095 9
0.06 -0.367 0.086 8
0.107 -0.358 0.114 8
0.053 -0.265 0.187 9
-0.038 -0.165 0.123 8
-0.108 -0.101 -0.027 8
-0.097 -0.091 -0.024 7
-0.181 -0.016 -0.206 10
-0.242 0.001 -0.411 9
-0.353 0.082 -0.659 8
-0.594 0.285 -0.843 8
-0.699 0.313 -0.67 9
-0.553 0.139 -0.303 8
-0.497 0.125 -0.272 9
-0.342 0.088 -0.024 8
-0.183 0.092 0.093 8
0.06 -0.051 0.148 9
0.35 -0.128 0.168 8
0.315 -0.115 0.151 7
0.783 0.091 -0.011 10
0.705 0.082 -0.01 8
0.582 0.151 -0.204 9
0.293 0.244 -0.324 8
-0.048 0.323 -0.467 9
-0.342 0.346 -0.673 8
-0.473 0.336 -0.705 8
-0.426 0.303 -0.634 9
-0.448 0.269 -0.527 8
-0.429 0.206 -0.368 8
-0.383 0.11 -0.18 9
-0.246 0.03 -0.004 7
-0.104 -0.033 -0.01 10
-0.001 -0.085 -0.162 8
-0.001 -0.077 -0.146 8
0.081 -0.067 -0.187 9
0.034 0.026 -0.115 8
-0.101 0.112 -0.038 9
-0.262 0.151 -0.081 8
-0.418 0.183 -0.188 8
-0.492 0.197 -0.232 9
-0.443 0.178 -0.208 8
-0.445 0.186 -0.269 9
-0.427 0.2 -0.427 6
-0.421 0.247 -0.589 10
-0.339 0.355 -0.608 9
-0.178 0.481 -0.514 8
-0.035 0.544 -0.337 9
-0.032 0.489 -0.303 8
0.056 0.48 -0.097 8
0.083 0.439 0.094 9
0.075 0.402 0.272 8
0.02 0.305 0.341 9
-0.125 0.213 0.244 8
-0.317 0.189 0.092 8
-0.286 0.17 0.083 7
-0.413 0.158 0.005 10
-0.439 0.184 -0.029 8
-0.359 0.207 -0.077 9
-0.205 0.198 -0.111 8
-0.086 0.2 -0.102 9
-0.078 0.18 -0.092 8
-0.051 0.112 0.062 8
-0.095 -0.07 0.269 9
-0.214 -0.209 0.407 8
-0.308 -0.251 0.555 9
-0.26 -0.282 0.634 8
-0.234 -0.254 0.57 7
-0.117 -0.283 0.571 10
-0.012 -0.287 0.537 8
0.016 -0.267 0.47 9
-0.047 -0.243 0.405 8
-0.166 -0.22 0.343 8
-0.263 -0.202 0.227 9
-0.246 -0.2 0.051 8
-0.222 -0.18 0.046 9
-0.122 -0.201 -0.117 8
-0.037 -0.249 -0.186 8
-0.022 -0.277 -0.08 9
-0.13 -0.235 0.13 6
-0.298 -0.17 0.276 11
-0.378 -0.201 0.28 8
-0.34 -0.181 0.252 8
-0.351 -0.174 0.153 9
-0.28 -0.097 -0.098 8
-0.179 -0.067 -0.39 8
-0.161 -0.017 -0.498 9
-0.178 0.017 -0.487 8
-0.205 0.032 -0.436 9
-0.185 0.028 -0.392 8
-0.187 0.065 -0.338 8
-0.074 0.2 -0.341 7
0.073 0.325 -0.377 10
0.094 0.277 -0.277 9
-0.055 0.17 0.05 8
-0.049 0.153 0.045 8
-0.23 0.105 0.4 9
-0.255 0.01 0.545 8
-0.142 -0.107 0.464 9
# end
#Thu Feb 26 20:34:57 GMT+08:00 20156
