# Supplementary material for: Abnormal Gait Behavior Detection for Elderly Based on Enhanced Wigner-Ville Analysis and Cloud Incremental SVM Learning
Source: Hindawi journal article supplement (doi:10.1155/2016/5869238), 2016-01-01
Supplement: f1 [file 5869238.f1.zip › Supplementary Materials/Original Data/Backward fall Ending Lying/original__94.txt]

# Accelerometer Values
# filename:  original__94.txt
# Saving start time: Thu Feb 26 20:35:00 GMT+08:00 2015

# sensor resolution: 0.0095825195m/s^2
#Sensorvendor: KIONIX, name: KX023 Accelerometer, type: 1,version : 1, range 39.240005

# X value, Y value, Z value, time diff in ms
-0.16 0.014 0.088 7
-0.084 -0.007 -0.123 10
0.055 -0.002 -0.3 8
0.164 0.007 -0.402 9
0.214 0.031 -0.424 8
0.206 0.06 -0.375 9
0.192 0.062 -0.276 8
0.172 0.055 -0.248 8
0.195 0.039 -0.123 9
0.25 0.052 -0.016 8
0.295 0.105 0.034 9
0.279 0.166 0.051 8
0.218 0.184 0.064 7
0.126 0.198 0.079 10
0.113 0.178 0.071 8
0.014 0.198 0.07 9
-0.061 0.17 0.023 8
-0.095 0.132 -0.07 8
-0.087 0.128 -0.167 9
-0.056 0.155 -0.234 8
-0.021 0.163 -0.273 9
-0.019 0.147 -0.246 8
0.024 0.12 -0.254 8
0.076 0.083 -0.237 9
0.096 0.058 -0.209 6
0.061 0.054 -0.158 10
-0.012 0.047 -0.045 9
-0.101 -0.012 0.146 8
-0.091 -0.011 0.131 9
-0.168 -0.121 0.368 8
-0.218 -0.21 0.537 8
-0.2 -0.236 0.561 9
-0.126 -0.222 0.447 8
-0.085 -0.154 0.225 9
-0.076 -0.138 0.202 8
-0.084 -0.01 -0.104 8
-0.103 0.099 -0.443 7
-0.123 0.165 -0.688 10
-0.136 0.196 -0.813 9
-0.102 0.189 -0.79 8
-0.022 0.134 -0.592 8
-0.02 0.12 -0.533 9
0.051 0.032 -0.277 8
0.109 -0.063 -0.004 8
0.156 -0.174 0.236 9
0.188 -0.282 0.375 8
0.217 -0.342 0.381 9
0.219 -0.318 0.276 8
0.197 -0.286 0.248 7
0.131 -0.215 0.107 10
-0.012 -0.149 -0.017 8
-0.208 -0.103 -0.1 9
-0.414 -0.05 -0.16 8
-0.583 -0.003 -0.211 8
-0.649 -0.002 -0.242 9
-0.584 -0.002 -0.217 8
-0.537 -0.026 -0.202 9
-0.429 -0.038 -0.146 8
-0.331 -0.051 -0.097 8
-0.239 -0.073 -0.057 9
-0.215 -0.065 -0.051 7
-0.12 -0.071 -0.023 10
-0.033 -0.093 -0.011 8
0.023 -0.186 0.0 8
0.053 -0.319 0.022 9
0.058 -0.416 0.071 8
0.085 -0.474 0.189 9
0.152 -0.529 0.292 8
0.137 -0.476 0.263 8
0.178 -0.569 0.287 9
0.147 -0.625 0.226 8
0.048 -0.587 0.098 8
-0.108 -0.508 0.001 7
-0.214 -0.391 -0.041 10
-0.216 -0.25 -0.125 9
-0.195 -0.225 -0.112 8
-0.173 -0.148 -0.364 8
-0.211 -0.13 -0.652 9
-0.322 -0.12 -0.741 8
-0.402 -0.129 -0.632 9
-0.418 -0.231 -0.436 8
-0.396 -0.438 -0.229 8
-0.357 -0.394 -0.206 9
-0.223 -0.569 -0.023 8
-0.008 -0.57 0.08 7
0.117 -0.469 -0.007 10
0.226 -0.495 -0.201 8
0.243 -0.538 -0.435 9
0.219 -0.485 -0.392 8
0.056 -0.441 -0.606 9
-0.104 -0.426 -0.708 8
-0.208 -0.428 -0.795 8
-0.248 -0.435 -0.913 9
-0.199 -0.444 -1.016 8
-0.059 -0.475 -1.128 8
-0.053 -0.427 -1.015 9
0.112 -0.524 -1.128 7
0.234 -0.662 -1.202 10
0.328 -0.808 -1.296 8
0.385 -0.919 -1.409 8
0.414 -0.963 -1.477 9
0.447 -0.963 -1.465 8
0.402 -0.867 -1.318 9
0.425 -0.908 -1.264 8
0.419 -0.996 -1.141 8
0.379 -1.086 -1.008 9
0.295 -1.165 -0.972 8
0.188 -1.209 -1.085 9
0.169 -1.088 -0.976 6
0.042 -0.942 -1.26 10
-0.006 -0.622 -1.509 9
0.109 -0.419 -1.581 8
0.239 -0.334 -1.547 9
0.204 -0.228 -1.437 8
0.021 -0.082 -1.238 8
0.019 -0.074 -1.114 9
-0.279 0.03 -0.956 8
-0.736 0.127 -0.876 9
-1.159 0.476 -0.774 8
-1.224 1.078 -0.439 8
-0.828 1.53 0.118 7
-0.201 1.728 0.562 10
-0.181 1.555 0.506 9
0.4 1.748 0.924 8
0.729 1.963 1.523 8
0.731 2.166 2.275 9
0.523 2.3 2.864 8
0.261 2.189 3.073 8
0.125 1.992 2.907 9
0.113 1.793 2.616 8
0.135 1.789 2.026 9
0.243 1.962 1.181 8
0.4 2.374 0.516 7
0.492 2.802 0.275 10
0.664 2.912 0.482 8
1.108 2.871 1.074 9
0.997 2.584 0.967 8
1.56 2.51 1.907 8
2.241 2.238 2.983 9
3.001 1.831 3.804 8
3.466 1.474 3.892 9
3.36 1.378 3.109 8
3.024 1.241 2.798 8
2.419 1.49 1.669 9
1.653 1.927 0.825 6
0.942 2.0 0.403 11
0.519 1.571 0.447 8
0.563 1.173 1.077 8
0.959 1.112 1.92 9
0.863 1.001 1.728 8
1.532 1.066 2.247 8
2.133 1.122 2.176 9
2.297 1.386 1.556 8
1.984 1.801 0.577 9
1.387 2.161 -0.421 8
0.587 2.268 -0.974 8
0.528 2.041 -0.877 7
-0.319 1.939 -0.595 10
-0.932 1.962 0.48 9
-0.94 2.533 2.098 8
0.521 2.66 3.295 8
2.918 1.406 3.17 9
4.217 -0.033 2.433 8
3.796 -0.03 2.189 9
3.237 -0.783 1.628 8
1.382 -1.257 1.184 8
-0.764 -1.831 0.965 9
-2.32 -2.557 0.838 8
-2.088 -2.302 0.754 7
-2.68 -2.949 0.197 10
-2.435 -3.216 -0.876 8
-1.711 -2.977 -2.167 9
-0.709 -2.355 -3.381 8
0.37 -1.786 -4.219 8
1.166 -1.465 -4.575 9
1.322 -1.245 -4.525 8
1.19 -1.12 -4.072 9
0.672 -0.925 -3.968 8
-0.296 -0.824 -4.13 8
-1.461 -0.786 -4.445 9
-2.524 -0.682 -4.764 7
-3.282 -0.449 -5.063 10
-3.49 -0.132 -5.122 8
-3.141 -0.118 -4.61 8
-2.764 0.176 -4.326 9
-2.08 0.375 -3.583 8
-1.433 0.483 -2.446 9
-0.862 0.531 -1.152 8
-0.235 0.453 -0.108 8
0.38 0.183 0.438 9
0.342 0.164 0.394 8
0.604 -0.148 0.607 9
0.319 -0.321 0.594 6
-0.245 -0.452 0.319 10
-0.705 -0.574 -0.121 9
-0.945 -0.629 -0.626 8
-0.85 -0.566 -0.837 9
-1.154 -0.509 -0.753 8
-1.555 -0.331 -0.412 8
-1.774 0.083 0.073 9
-1.662 0.398 0.449 8
-1.322 0.566 0.877 8
-0.852 0.649 1.416 9
-0.767 0.584 1.275 8
-0.264 0.594 1.786 7
0.184 0.574 1.976 10
0.326 0.636 1.645 8
0.076 0.763 0.952 9
-0.473 0.855 0.355 8
-1.281 0.921 0.247 9
-1.153 0.829 0.222 8
-1.854 0.892 0.706 8
-2.105 0.867 1.431 9
-1.867 0.709 2.042 8
-1.19 0.431 2.538 9
-0.198 0.018 2.863 8
-0.178 0.016 2.576 7
0.839 -0.509 2.55 10
1.533 -1.014 2.051 8
1.737 -1.315 1.228 9
1.499 -1.411 0.413 8
0.947 -1.39 -0.176 8
0.252 -1.273 -0.671 9
0.227 -1.146 -1.162 8
-0.437 -1.031 -1.046 9
-0.922 -0.737 -1.338 8
-0.995 -0.599 -1.196 8
-0.547 -0.565 -0.749 9
0.082 -0.583 -0.18 6
0.624 -0.52 0.376 10
0.562 -0.468 0.338 9
0.985 -0.34 0.678 8
1.231 -0.262 0.754 9
1.285 -0.21 0.705 8
1.144 -0.131 0.558 8
0.909 -0.057 0.203 9
0.598 0.002 -0.196 8
0.539 0.002 -0.176 9
0.194 0.053 -0.454 8
-0.077 0.072 -0.654 8
-0.203 0.076 -0.88 7
-0.14 0.081 -1.154 10
0.143 0.059 -1.471 9
0.52 -0.008 -1.736 8
0.468 -0.007 -1.563 8
0.643 -0.085 -1.614 9
0.494 -0.143 -1.428 8
0.099 -0.199 -1.168 9
-0.421 -0.212 -1.018 8
-0.985 -0.139 -1.022 8
-0.886 -0.008 -1.193 9
-1.372 -0.007 -1.073 8
-1.614 0.15 -1.398 7
-1.528 0.354 -1.792 10
-1.255 0.573 -2.183 8
-0.989 0.684 -2.264 9
-0.793 0.688 -1.918 8
-0.713 0.619 -1.727 8
-0.652 0.609 -1.282 9
-0.701 0.608 -0.737 8
-0.641 0.624 -0.168 9
-0.369 0.617 0.144 8
-0.031 0.594 0.264 8
0.241 0.61 0.357 9
0.217 0.549 0.321 7
0.416 0.591 0.488 10
0.571 0.612 0.657 8
0.683 0.498 0.594 8
0.744 0.306 0.253 9
0.801 0.171 -0.341 8
0.79 0.079 -1.124 9
0.711 0.071 -1.012 8
0.455 0.054 -1.627 8
-0.049 0.101 -1.796 9
-0.559 0.158 -1.487 8
-0.814 0.184 -0.868 9
-0.733 0.165 -0.781 6
-0.393 0.175 0.163 10
-0.354 0.157 0.146 9
0.062 0.334 0.361 8
0.509 0.6 0.286 8
0.896 0.723 0.022 9
1.048 0.786 -0.175 8
0.859 0.852 -0.138 9
0.773 0.767 -0.124 8
0.355 0.799 0.091 8
-0.067 0.726 0.332 9
-0.339 0.576 0.495 8
-0.472 0.425 0.591 7
-0.528 0.312 0.755 10
-0.553 0.258 1.039 8
-0.498 0.232 0.935 9
-0.359 0.226 1.147 8
0.091 0.194 1.101 9
0.637 0.12 0.784 8
1.015 0.043 0.341 8
0.987 -0.175 -0.157 9
0.731 -0.325 -0.497 8
0.658 -0.292 -0.448 9
0.605 -0.094 -0.282 8
0.481 0.086 0.073 7
0.215 0.048 0.439 10
0.23 -0.179 0.769 8
0.545 -0.453 1.065 9
0.491 -0.735 1.529 8
0.808 -0.661 1.376 8
0.966 -1.01 1.672 9
1.019 -1.217 1.625 8
0.919 -1.191 1.476 8
0.598 -1.036 1.295 9
0.087 -0.863 0.971 8
0.078 -0.776 0.874 9
-0.527 -0.59 0.463 6
-1.031 -0.355 0.148 10
-1.316 -0.126 -0.076 9
-1.329 0.03 -0.304 8
-1.102 -0.018 -0.657 9
-0.865 -0.178 -1.087 8
-0.778 -0.16 -0.978 8
-0.659 -0.131 -1.213 9
-0.619 0.014 -1.145 8
-0.6 0.036 -0.913 9
-0.589 0.033 -0.543 8
-0.583 0.055 -0.124 8
-0.524 0.049 -0.112 7
-0.522 0.059 0.163 10
-0.518 0.116 0.215 9
-0.46 0.143 -0.002 8
-0.359 0.143 -0.336 8
-0.247 0.141 -0.632 9
-0.106 0.112 -0.912 8
-0.095 0.101 -0.821 9
-0.017 0.231 -0.813 8
-0.076 0.516 -0.398 8
-0.131 0.558 0.083 9
-0.027 0.326 0.443 8
0.163 0.113 0.59 7
0.312 0.029 0.531 10
0.281 0.026 0.478 8
0.358 -0.003 0.268 9
0.381 -0.033 0.016 8
0.346 -0.087 -0.198 8
0.223 -0.076 -0.243 9
0.046 -0.023 -0.101 8
-0.091 -0.077 0.054 9
-0.081 -0.069 0.049 8
-0.161 -0.16 0.219 8
-0.204 -0.22 0.387 9
-0.17 -0.276 0.486 6
-0.083 -0.309 0.507 11
0.002 -0.307 0.442 8
0.028 -0.241 0.222 8
0.026 -0.217 0.2 9
-0.029 -0.08 -0.103 8
-0.132 0.048 -0.311 9
-0.219 0.113 -0.396 8
-0.264 0.141 -0.408 8
-0.275 0.165 -0.377 9
-0.247 0.149 -0.339 8
-0.234 0.159 -0.286 8
-0.234 0.158 -0.201 7
-0.255 0.121 -0.058 10
-0.244 0.074 0.085 9
-0.209 0.171 0.145 8
-0.111 0.279 0.081 8
-0.1 0.251 0.073 9
0.18 0.161 -0.087 8
0.417 0.037 -0.194 9
0.366 -0.017 -0.065 8
0.118 -0.054 0.237 8
-0.163 -0.121 0.417 9
-0.407 -0.204 0.529 8
-0.366 -0.183 0.476 7
-0.593 -0.162 0.537 10
-0.608 -0.067 0.285 8
-0.359 -0.005 -0.225 9
-0.093 0.017 -0.56 8
0.041 0.047 -0.602 9
0.027 0.119 -0.632 8
0.024 0.107 -0.569 8
-0.055 0.161 -0.588 9
-0.146 0.138 -0.421 8
-0.247 0.071 -0.03 9
-0.319 -0.013 0.372 8
-0.287 -0.011 0.335 7
-0.308 -0.099 0.594 10
-0.281 -0.089 0.535 8
-0.239 -0.157 0.404 8
-0.185 -0.077 0.203 9
-0.09 -0.011 -0.021 8
0.051 0.013 -0.199 9
0.243 -0.001 -0.316 8
0.218 -0.001 -0.284 8
0.311 0.097 -0.311 9
0.216 0.305 -0.176 8
0.098 0.275 0.038 9
0.013 0.025 0.222 6
-0.117 -0.199 0.391 10
-0.209 -0.331 0.515 9
-0.188 -0.298 0.464 8
-0.147 -0.304 0.497 9
-0.033 -0.253 0.475 8
0.083 -0.264 0.444 8
0.149 -0.323 0.411 9
0.126 -0.347 0.379 8
0.052 -0.322 0.339 9
0.047 -0.29 0.305 8
0.004 -0.309 0.227 8
-0.047 -0.333 0.091 7
-0.234 -0.189 0.03 10
-0.491 0.018 0.099 8
-0.59 0.021 0.177 9
-0.483 -0.125 0.229 8
-0.434 -0.113 0.206 9
-0.282 -0.234 0.278 8
-0.134 -0.304 0.296 8
0.005 -0.316 0.219 9
0.108 -0.284 0.139 8
0.165 -0.231 0.062 9
0.149 -0.208 0.055 8
0.175 -0.13 -0.072 7
0.151 -0.012 -0.24 10
0.033 0.13 -0.296 8
-0.099 0.154 -0.193 9
-0.19 0.129 -0.118 8
-0.331 0.19 -0.113 8
-0.298 0.171 -0.102 9
-0.432 0.161 -0.106 8
-0.38 0.112 -0.164 9
-0.252 0.12 -0.26 8
-0.168 0.16 -0.258 8
-0.066 0.202 -0.216 9
-0.059 0.182 -0.195 6
0.089 0.168 -0.197 11
0.232 0.116 -0.197 8
0.309 0.042 -0.183 8
0.3 -0.047 -0.129 9
0.25 -0.147 -0.069 8
0.146 -0.169 -0.155 8
-0.031 -0.084 -0.294 9
-0.028 -0.076 -0.265 8
-0.217 0.027 -0.25 9
-0.305 0.152 -0.239 8
-0.197 0.255 -0.35 8
0.059 0.296 -0.531 7
0.3 0.304 -0.662 10
0.418 0.304 -0.597 9
0.376 0.273 -0.537 8
0.386 0.285 -0.366 8
0.349 0.366 -0.153 9
0.273 0.467 0.06 8
0.19 0.384 0.196 9
0.176 0.195 0.334 8
0.158 0.175 0.3 8
0.156 0.082 0.46 9
0.084 0.136 0.548 8
-0.017 0.303 0.559 7
-0.019 0.43 0.537 10
0.023 0.495 0.502 8
0.008 0.458 0.461 9
0.008 0.412 0.415 8
-0.042 0.284 0.384 8
-0.137 0.174 0.375 9
-0.245 0.052 0.345 8
-0.306 -0.051 0.286 9
-0.282 -0.049 0.215 8
-0.144 -0.034 0.146 8
-0.13 -0.03 0.131 9
0.042 -0.052 0.101 7
0.152 -0.089 0.112 10
0.205 -0.148 0.123 8
0.294 -0.218 0.063 8
0.281 -0.351 -0.033 9
-0.1 -0.325 -0.076 8
-0.09 -0.292 -0.069 9
-0.665 -0.154 -0.011 8
-1.074 -0.139 0.144 8
-1.114 -0.195 0.244 9
-0.791 -0.287 0.2 8
-0.282 -0.303 0.065 9
-0.254 -0.272 0.058 6
0.156 -0.238 -0.047 10
0.16 -0.213 0.04 9
-0.2 -0.154 0.38 8
-0.642 -0.149 0.796 9
-0.949 -0.312 0.989 8
-1.069 -0.534 0.907 8
-0.962 -0.48 0.817 9
-1.006 -0.613 0.487 8
# end
#Thu Feb 26 20:35:04 GMT+08:00 20158
