# Supplementary material for: Abnormal Gait Behavior Detection for Elderly Based on Enhanced Wigner-Ville Analysis and Cloud Incremental SVM Learning
Source: Hindawi journal article supplement (doi:10.1155/2016/5869238), 2016-01-01
Supplement: f1 [file 5869238.f1.zip › Supplementary Materials/Original Data/Backward fall Ending Lying/original__95.txt]

# Accelerometer Values
# filename:  original__95.txt
# Saving start time: Thu Feb 26 20:35:07 GMT+08:00 2015

# sensor resolution: 0.0095825195m/s^2
#Sensorvendor: KIONIX, name: KX023 Accelerometer, type: 1,version : 1, range 39.240005

# X value, Y value, Z value, time diff in ms
-0.144 -0.008 -0.389 9
-0.161 -0.005 -0.217 7
-0.044 -0.013 -0.071 10
0.146 -0.023 0.035 8
0.241 -0.026 0.124 8
0.216 -0.032 0.195 9
0.08 -0.039 0.234 8
0.072 -0.035 0.211 9
-0.103 -0.033 0.211 8
-0.216 -0.025 0.156 8
-0.226 -0.052 0.078 9
-0.191 -0.112 -0.039 8
-0.207 -0.103 -0.148 9
-0.186 -0.093 -0.133 6
-0.219 -0.079 -0.095 10
-0.213 -0.101 -0.018 9
-0.182 -0.102 0.024 8
-0.063 -0.105 0.063 8
0.111 -0.088 0.088 9
0.206 -0.044 0.109 8
0.175 -0.005 0.121 9
0.158 -0.005 0.109 8
0.046 0.006 0.125 8
-0.066 -0.008 0.14 9
-0.142 -0.047 0.16 8
-0.176 -0.093 0.176 7
-0.17 -0.113 0.172 10
-0.153 -0.101 0.155 8
-0.037 -0.114 0.133 9
0.2 -0.113 0.111 8
0.379 -0.091 0.122 9
0.387 -0.06 0.17 8
0.262 -0.017 0.236 8
0.117 0.024 0.265 9
0.105 0.022 0.239 8
-0.015 0.046 0.206 9
-0.139 0.056 0.138 8
-0.218 0.05 0.062 7
-0.246 0.034 -0.009 10
-0.241 0.013 -0.076 8
-0.15 -0.018 -0.16 9
-0.135 -0.016 -0.144 8
0.057 -0.016 -0.285 8
0.209 0.037 -0.388 9
0.249 0.077 -0.349 8
0.173 0.07 -0.231 8
0.019 0.027 -0.109 9
-0.154 0.02 -0.026 8
-0.139 0.018 -0.023 9
-0.305 0.038 0.026 6
-0.349 -0.004 0.052 10
-0.277 -0.068 0.014 9
-0.187 -0.122 -0.093 8
-0.044 -0.156 -0.199 9
-0.04 -0.14 -0.179 8
0.169 -0.111 -0.234 8
0.38 -0.052 -0.332 9
0.479 0.023 -0.551 8
0.427 0.095 -0.745 9
0.393 0.114 -0.777 8
0.5 -0.069 -0.784 8
0.45 -0.062 -0.706 7
0.548 -0.372 -0.874 10
0.528 -0.486 -1.046 9
0.56 -0.404 -0.991 8
0.444 -0.299 -0.859 8
0.192 -0.239 -0.782 9
0.158 -0.181 -0.615 8
0.142 -0.163 -0.553 9
0.208 -0.198 -0.466 8
0.181 -0.347 -0.649 8
0.033 -0.457 -0.867 9
-0.225 -0.467 -0.95 8
-0.455 -0.39 -0.93 7
-0.744 -0.275 -0.859 10
-0.669 -0.248 -0.773 8
-1.008 -0.206 -0.708 9
-1.101 -0.268 -0.641 8
-0.984 -0.406 -0.634 8
-0.694 -0.683 -0.718 9
-0.226 -1.035 -0.803 8
-0.203 -0.931 -0.722 9
0.345 -1.199 -0.65 8
0.894 -1.336 -0.851 8
1.383 -1.497 -0.839 9
1.758 -1.705 -0.844 6
1.988 -1.769 -0.852 11
1.851 -1.856 -0.904 8
1.666 -1.671 -0.814 8
1.063 -1.868 -1.05 9
0.353 -1.919 -1.34 8
-0.126 -1.856 -1.457 9
-0.33 -1.856 -1.429 8
-0.288 -1.856 -1.306 8
-0.178 -1.686 -1.162 9
-0.16 -1.518 -1.046 8
-0.103 -1.249 -0.9 8
-0.185 -0.863 -0.598 7
-0.463 -0.455 -0.188 10
-0.725 -0.334 0.133 9
-0.718 -0.468 0.315 8
-0.544 -0.591 0.276 8
-0.489 -0.532 0.249 9
-0.469 -0.566 -0.267 8
-0.448 -0.383 -0.8 9
-0.321 0.176 -0.676 8
-0.17 0.646 -0.186 8
0.167 0.683 0.343 9
0.151 0.614 0.309 8
0.484 0.543 0.899 7
0.546 0.497 1.594 10
0.404 0.54 2.206 8
0.145 0.702 2.364 9
-0.214 0.988 1.968 8
-0.417 1.387 1.568 9
-0.375 1.248 1.412 8
-0.224 1.767 1.277 8
0.167 2.25 1.148 9
0.63 2.472 1.101 8
1.004 2.39 1.243 8
1.292 2.17 1.638 9
1.163 1.953 1.474 7
1.389 1.877 2.134 10
1.571 1.867 2.938 8
1.855 1.94 3.729 8
2.262 2.03 4.535 9
2.647 2.044 5.321 8
2.891 2.076 5.883 9
3.034 2.184 6.085 8
2.731 1.965 5.476 8
2.877 2.135 5.325 9
2.921 2.286 4.759 8
2.809 2.446 4.009 9
2.593 2.521 3.299 6
2.35 2.494 2.651 10
2.115 2.245 2.386 9
1.918 2.224 1.807 8
1.777 2.129 1.195 9
1.791 1.873 0.713 8
2.024 1.563 0.461 8
2.415 1.293 0.304 9
2.826 1.021 0.227 8
2.544 0.919 0.205 9
2.788 0.661 0.246 8
2.869 0.2 0.14 8
2.732 -0.36 -0.001 7
2.231 -0.667 0.191 10
1.537 -0.707 0.463 8
0.985 -0.679 0.784 9
0.886 -0.611 0.705 8
0.88 -0.476 1.149 9
1.38 -0.329 1.647 8
1.968 -0.3 2.145 8
2.321 -0.246 2.155 9
2.268 -0.07 1.316 8
1.879 0.152 -0.33 9
1.691 0.136 -0.297 8
0.891 0.403 -2.23 7
0.361 0.142 -3.611 10
0.143 -0.522 -4.251 8
-0.45 -0.872 -4.113 9
-1.146 -1.286 -3.261 8
-1.031 -1.157 -2.935 8
-1.554 -1.713 -1.974 9
-1.664 -2.177 -1.365 8
-1.33 -2.532 -1.344 9
-0.841 -2.732 -2.033 8
-0.628 -2.732 -3.326 8
-1.129 -2.468 -4.906 9
-1.016 -2.222 -4.415 6
-1.946 -1.995 -5.879 11
-2.775 -2.238 -7.029 8
-3.743 -2.485 -7.682 8
-4.676 -2.146 -7.421 9
-4.93 -1.527 -6.355 8
-4.281 -1.054 -4.896 8
-3.853 -0.948 -4.407 9
-2.664 -0.669 -3.101 8
-1.37 -0.6 -2.21 9
-0.554 -0.607 -1.508 8
-0.523 -0.552 -0.757 8
-1.004 -0.41 -0.308 7
-1.614 -0.19 -0.474 10
-1.453 -0.171 -0.427 9
-1.784 0.068 -0.989 8
-1.521 0.266 -1.428 8
-0.952 0.461 -1.397 9
-0.487 0.746 -1.04 8
-0.398 1.016 -0.605 9
-0.358 0.914 -0.544 8
-0.772 1.159 -0.49 8
-1.484 1.359 -0.141 9
-2.249 1.453 -0.197 8
-2.886 1.586 -0.097 7
-3.055 1.866 0.039 10
-2.505 2.248 0.046 8
-2.255 2.023 0.041 9
-1.263 2.46 0.023 8
-0.223 2.914 -0.125 8
0.563 3.221 -0.53 9
0.964 3.24 -0.949 8
0.988 3.069 -1.105 9
0.686 2.742 -0.851 8
0.617 2.467 -0.766 8
0.181 2.138 -0.146 9
-0.197 2.009 0.634 7
-0.337 2.14 1.073 10
-0.106 2.326 0.845 8
0.339 2.415 0.262 8
0.834 2.481 -0.404 9
0.751 2.232 -0.363 8
1.208 2.242 -0.94 9
1.286 2.035 -1.152 8
0.839 1.706 -0.919 8
0.009 1.376 -0.265 9
-0.973 1.01 0.749 8
-0.876 0.909 1.825 9
-1.63 0.818 1.642 6
-1.695 0.312 2.334 10
-1.046 0.131 2.521 9
-0.175 -0.044 2.447 8
0.617 -0.267 2.263 9
1.273 -0.614 2.089 8
1.145 -0.553 1.88 8
1.516 -0.913 1.752 9
1.465 -1.23 1.58 8
1.036 -1.524 1.311 9
0.44 -1.842 0.996 8
-0.157 -2.126 0.779 8
-0.141 -1.913 0.701 7
-0.633 -2.083 0.591 10
-0.978 -2.189 0.427 8
-1.224 -2.293 0.236 9
-1.275 -2.355 0.237 8
-1.008 -2.324 0.43 9
-0.594 -2.168 0.614 8
-0.235 -1.865 0.6 8
-0.211 -1.678 0.54 9
-0.084 -1.356 0.254 8
-0.31 -1.039 -0.195 9
-0.718 -0.755 -0.659 8
-1.073 -0.651 -0.902 7
-1.323 -0.656 -0.796 10
-1.19 -0.59 -0.716 8
-1.296 -0.624 -0.472 9
-1.152 -0.77 -0.199 8
-0.841 -0.944 0.219 8
-0.452 -1.018 0.721 9
-0.145 -1.004 1.197 8
-0.099 -0.914 1.533 9
-0.089 -0.823 1.38 8
-0.281 -0.554 1.377 8
-0.545 -0.134 1.089 9
-0.712 0.267 0.661 6
-0.734 0.68 0.068 10
-0.591 1.067 -0.605 9
-0.326 1.346 -1.115 8
-0.294 1.211 -1.004 9
0.079 1.407 -1.266 8
0.488 1.471 -1.377 8
0.874 1.276 -1.297 9
1.125 0.803 -0.923 8
0.848 0.348 -0.299 9
0.276 -0.274 0.131 8
0.248 -0.246 0.118 8
-0.469 -0.666 -0.147 7
-1.334 -0.75 -1.113 10
-1.848 -0.962 -2.418 9
-1.868 -1.097 -3.605 8
-1.588 -1.243 -4.399 8
-1.429 -1.119 -3.959 9
-1.189 -1.287 -4.207 8
-1.157 -1.366 -3.799 8
-1.169 -1.25 -2.856 9
-0.792 -0.875 -1.772 8
0.153 -0.178 -1.186 9
1.428 0.659 -1.279 8
1.285 0.593 -1.151 7
2.656 1.033 -1.746 10
3.45 1.355 -2.278 8
3.346 1.799 -2.367 9
2.792 2.214 -2.235 8
2.301 2.681 -2.048 8
2.155 3.156 -1.857 9
1.94 2.84 -1.671 8
1.921 3.216 -1.753 9
1.896 3.253 -2.009 8
1.915 2.905 -1.961 8
1.79 2.141 -1.577 9
1.611 1.927 -1.419 7
1.167 0.717 -0.305 10
1.05 0.646 -0.274 8
-0.241 0.354 0.381 8
-0.616 0.24 1.008 9
-0.551 0.161 1.469 8
-0.297 -0.014 1.62 9
-0.025 -0.21 1.604 8
-0.023 -0.189 1.443 8
0.107 -0.414 1.116 9
0.04 -0.768 0.688 8
-0.146 -0.989 0.679 9
-0.288 -0.985 1.028 6
-0.284 -0.863 1.623 10
-0.338 -0.513 2.162 9
-0.304 -0.462 1.946 8
-0.53 0.102 2.039 8
-0.68 0.808 1.774 9
-0.696 1.268 1.435 8
-0.734 1.004 1.024 9
-0.774 0.298 0.691 8
-0.87 -0.362 0.581 8
-0.783 -0.326 0.523 9
-0.934 -0.86 0.532 8
-0.907 -1.295 0.706 7
-0.759 -1.457 0.951 10
-0.614 -1.184 1.042 8
-0.442 -0.68 0.966 9
-0.398 -0.612 0.869 8
-0.28 -0.125 0.794 9
-0.287 0.3 0.923 8
-0.428 0.703 1.318 8
-0.632 1.088 1.722 9
-0.693 1.514 2.004 8
-0.301 1.874 2.256 9
-0.271 1.686 2.031 8
0.518 1.71 2.064 7
1.422 1.547 1.662 10
2.167 1.591 1.193 8
2.509 1.661 0.749 9
2.556 1.502 0.306 8
2.434 1.233 0.053 8
2.191 1.11 0.048 9
1.891 0.558 -0.085 8
1.405 -0.299 -0.147 8
0.857 -1.168 0.02 9
0.391 -1.923 0.353 8
0.013 -2.38 0.546 9
0.011 -2.142 0.492 6
-0.232 -2.292 0.532 10
-0.275 -2.303 0.482 9
-0.208 -2.297 0.416 8
-0.163 -2.188 0.389 9
-0.208 -1.887 0.289 8
-0.298 -1.567 0.041 8
-0.268 -1.41 0.036 9
-0.349 -1.167 -0.226 8
-0.485 -0.906 -0.378 9
-0.702 -0.584 -0.44 8
-0.927 -0.246 -0.529 8
-1.037 0.097 -0.735 7
-0.931 0.421 -0.984 10
-0.838 0.379 -0.885 8
-0.535 0.547 -0.96 9
-0.198 0.512 -0.885 8
0.011 0.339 -0.718 9
0.097 0.133 -0.299 8
0.052 -0.041 0.272 8
-0.094 -0.229 0.782 9
-0.085 -0.206 0.704 8
-0.206 -0.347 1.103 9
-0.194 -0.438 1.243 8
-0.097 -0.471 1.016 7
-0.01 -0.434 0.699 10
0.02 -0.422 0.497 8
0.018 -0.38 0.41 9
-0.008 -0.404 0.369 8
-0.118 -0.436 0.387 8
-0.277 -0.414 0.47 9
-0.356 -0.369 0.495 8
-0.32 -0.354 0.429 9
-0.264 -0.36 0.341 8
-0.237 -0.324 0.307 8
-0.224 -0.352 0.236 9
-0.23 -0.362 0.198 6
-0.212 -0.359 0.16 11
-0.165 -0.344 0.111 8
-0.116 -0.296 0.068 8
-0.109 -0.215 0.035 9
-0.098 -0.193 0.031 8
-0.088 -0.082 -0.001 9
-0.042 0.052 -0.06 8
0.007 0.216 -0.132 8
0.046 0.349 -0.189 9
0.068 0.405 -0.209 8
0.067 0.416 -0.186 8
0.06 0.374 -0.167 7
0.075 0.366 -0.143 10
0.127 0.318 -0.159 9
0.168 0.238 -0.144 8
0.146 0.169 -0.043 8
0.079 0.104 0.067 9
0.071 0.093 0.06 8
0.031 0.026 0.135 9
0.053 -0.015 0.138 8
0.114 0.011 0.029 8
0.161 0.066 -0.101 9
0.128 0.105 -0.132 8
0.115 0.095 -0.119 7
0.025 0.152 -0.137 10
-0.046 0.162 -0.231 8
-0.076 0.109 -0.273 9
-0.066 0.089 -0.204 8
-0.031 0.053 -0.142 9
-0.008 0.03 -0.105 8
0.007 0.112 -0.118 8
0.007 0.1 -0.106 9
0.022 0.195 -0.226 8
0.011 0.232 -0.35 8
-0.024 0.245 -0.416 9
-0.05 0.215 -0.437 7
-0.065 0.137 -0.349 10
-0.058 0.123 -0.314 8
-0.082 0.021 -0.097 8
-0.104 -0.113 0.152 9
-0.098 -0.175 0.309 8
-0.018 -0.111 0.246 9
0.082 -0.025 -0.013 8
0.077 0.056 -0.223 8
0.069 0.05 -0.2 9
-0.063 0.114 -0.233 8
-0.243 0.102 -0.103 9
-0.354 0.021 0.105 6
-0.309 -0.106 0.268 10
-0.164 -0.214 0.305 9
-0.046 -0.219 0.235 8
-0.042 -0.197 0.211 9
0.0 -0.117 0.105 8
-0.031 -0.006 0.058 8
-0.028 -0.01 0.123 9
0.047 -0.139 0.219 8
0.076 -0.16 0.268 9
0.068 -0.144 0.241 8
0.03 -0.064 0.242 8
-0.076 0.003 0.197 7
-0.216 0.067 0.108 10
-0.301 0.098 -0.004 8
-0.322 0.107 -0.103 9
-0.262 0.121 -0.189 8
-0.235 0.109 -0.17 9
-0.201 0.151 -0.298 8
-0.129 0.086 -0.341 8
0.016 -0.102 -0.222 9
0.075 -0.151 -0.089 8
0.046 -0.022 -0.022 9
0.121 0.0 0.024 8
0.109 0.0 0.021 7
0.274 -0.125 0.067 10
0.345 -0.131 0.109 8
0.34 -0.059 0.188 9
0.301 -0.07 0.274 8
0.256 -0.074 0.305 8
0.2 0.009 0.254 9
0.18 0.008 0.229 8
0.128 0.066 0.185 9
0.083 0.096 0.198 8
0.095 0.066 0.217 8
0.166 -0.004 0.146 9
0.149 -0.004 0.131 6
0.152 0.059 -0.296 11
0.099 0.053 -0.266 8
0.034 0.192 -0.324 8
-0.024 0.18 -0.272 9
-0.064 0.172 -0.156 8
-0.061 0.075 -0.01 8
-0.013 -0.074 0.135 9
-0.011 -0.066 0.122 8
-0.008 -0.12 0.183 9
-0.042 -0.141 0.14 8
-0.098 -0.079 0.072 8
-0.197 0.082 -0.013 7
-0.305 0.201 -0.127 10
-0.361 0.224 -0.133 9
-0.325 0.202 -0.119 8
-0.229 0.064 -0.173 8
0.022 -0.24 -0.215 9
0.247 -0.443 -0.006 8
0.342 -0.296 0.211 9
0.342 -0.144 0.27 8
0.248 -0.105 0.261 8
0.224 -0.094 0.235 9
0.021 0.05 0.205 8
-0.242 0.172 0.073 7
-0.443 0.251 -0.158 10
-0.503 0.303 -0.399 8
-0.51 0.307 -0.605 9
-0.459 0.277 -0.545 8
-0.494 0.273 -0.671 8
-0.547 0.248 -0.716 9
-0.545 0.197 -0.676 8
-0.456 0.139 -0.505 9
-0.298 0.083 -0.279 8
-0.069 0.017 -0.036 8
-0.062 0.015 -0.033 9
0.158 -0.078 0.167 7
0.3 -0.167 0.29 10
0.342 -0.198 0.378 8
0.27 -0.209 0.418 8
0.072 -0.238 0.413 9
-0.158 -0.213 0.383 8
-0.142 -0.192 0.344 9
-0.294 -0.095 0.286 8
-0.344 -0.038 0.201 8
-0.296 -0.075 0.159 9
-0.12 -0.169 0.218 8
0.094 -0.239 0.278 9
0.084 -0.215 0.25 6
0.218 -0.247 0.265 10
0.247 -0.259 0.278 9
0.166 -0.254 0.328 8
0.072 -0.241 0.38 9
0.016 -0.2 0.343 8
0.03 -0.131 0.216 8
0.027 -0.118 0.195 9
0.064 -0.045 -0.002 8
-0.028 0.069 -0.182 8
-0.207 0.202 -0.201 9
-0.387 0.275 -0.076 8
-0.57 0.304 0.049 7
-0.622 0.311 0.079 10
-0.56 0.28 0.071 8
-0.423 0.268 -0.015 9
-0.19 0.223 -0.185 8
0.096 0.133 -0.33 9
0.311 0.05 -0.371 8
0.313 0.0 -0.293 8
0.143 -0.011 -0.132 9
0.129 -0.01 -0.119 8
-0.105 0.014 0.051 9
-0.353 0.072 0.18 8
-0.481 0.096 0.269 7
-0.396 0.054 0.295 10
-0.242 0.054 0.221 8
-0.218 0.048 0.199 9
-0.11 0.102 0.012 8
-0.033 0.169 -0.239 8
0.086 0.277 -0.431 9
0.103 0.311 -0.669 8
-0.045 0.26 -0.732 8
-0.242 0.265 -0.434 9
-0.218 0.239 -0.39 8
-0.388 0.199 -0.089 9
-0.415 0.094 0.048 6
-0.296 0.005 0.212 10
-0.141 -0.163 0.362 9
-0.069 -0.331 0.428 8
0.009 -0.245 0.461 9
0.008 -0.22 0.415 8
0.081 -0.212 0.162 8
-0.159 -0.162 -0.246 9
-0.551 0.122 -0.457 8
-0.776 0.146 -0.427 9
-0.839 0.07 -0.183 8
-0.755 0.063 -0.165 8
-0.585 0.093 -0.148 7
-0.095 0.084 0.176 10
0.519 0.083 -0.044 9
0.943 0.16 -0.312 8
1.019 0.317 -0.434 8
0.757 0.55 -0.457 9
0.681 0.495 -0.412 8
0.318 0.701 -0.367 9
0.183 0.771 -0.238 8
0.299 0.739 -0.127 8
0.399 0.683 -0.037 9
0.417 0.698 0.039 8
0.376 0.628 0.035 7
0.278 0.803 -0.009 10
0.277 0.899 -0.109 8
0.435 0.877 -0.252 9
0.503 0.796 -0.364 8
0.393 0.513 -0.461 8
0.089 0.198 -0.429 9
-0.307 -0.105 -0.288 8
-0.276 -0.095 -0.259 9
-0.649 -0.417 -0.307 8
-0.895 -0.639 -0.42 8
# end
#Thu Feb 26 20:35:12 GMT+08:00 20150
