# Supplementary material for: Abnormal Gait Behavior Detection for Elderly Based on Enhanced Wigner-Ville Analysis and Cloud Incremental SVM Learning
Source: Hindawi journal article supplement (doi:10.1155/2016/5869238), 2016-01-01
Supplement: f1 [file 5869238.f1.zip › Supplementary Materials/Original Data/Backward fall Ending Lying/original__96.txt]

# Accelerometer Values
# filename:  original__96.txt
# Saving start time: Thu Feb 26 20:35:15 GMT+08:00 2015

# sensor resolution: 0.0095825195m/s^2
#Sensorvendor: KIONIX, name: KX023 Accelerometer, type: 1,version : 1, range 39.240005

# X value, Y value, Z value, time diff in ms
-0.243 -0.203 0.091 10
-0.082 -0.195 -0.159 8
-0.073 -0.176 -0.143 9
0.174 -0.164 -0.316 8
0.427 -0.149 -0.344 8
0.494 -0.137 -0.227 9
0.361 -0.134 -0.041 8
0.167 -0.133 0.139 9
0.151 -0.12 0.125 8
0.041 -0.116 0.242 8
0.019 -0.104 0.252 9
0.022 -0.086 0.197 7
0.017 -0.073 0.111 10
0.042 -0.06 0.0 8
0.093 -0.046 -0.106 8
0.084 -0.042 -0.095 9
0.09 -0.033 -0.162 8
0.027 -0.03 -0.175 9
-0.047 -0.025 -0.122 8
-0.089 -0.02 -0.042 8
-0.102 -0.017 0.005 9
-0.087 -0.013 0.013 8
-0.078 -0.012 0.011 9
-0.007 -0.015 -0.012 6
0.088 -0.02 -0.054 10
0.122 -0.021 -0.082 9
0.157 -0.024 -0.145 8
0.241 -0.028 -0.251 9
0.285 -0.023 -0.296 8
0.257 -0.021 -0.266 8
0.165 -0.012 -0.259 9
0.001 -0.01 -0.247 8
-0.112 -0.01 -0.18 9
-0.17 -0.002 -0.076 8
-0.195 0.004 -0.022 8
-0.175 0.004 -0.02 7
-0.179 -0.011 -0.004 10
-0.191 -0.018 -0.007 8
-0.19 -0.024 0.024 9
-0.153 -0.067 0.083 8
-0.113 -0.135 0.104 9
-0.09 -0.204 0.139 8
-0.081 -0.183 0.125 8
-0.099 -0.26 0.19 9
-0.172 -0.355 0.254 8
-0.26 -0.482 0.294 9
-0.349 -0.616 0.352 8
-0.466 -0.696 0.463 7
-0.59 -0.722 0.615 10
-0.531 -0.65 0.554 8
-0.607 -0.666 0.65 9
-0.57 -0.68 0.605 8
-0.412 -0.67 0.431 8
-0.198 -0.603 0.203 9
-0.05 -0.495 0.026 8
0.012 -0.399 -0.103 9
0.011 -0.359 -0.093 8
0.076 -0.295 -0.214 8
0.16 -0.25 -0.358 9
0.231 -0.22 -0.564 6
0.297 -0.208 -0.799 11
0.473 -0.237 -0.96 8
0.426 -0.213 -0.864 8
0.654 -0.314 -1.072 9
0.772 -0.438 -1.373 8
0.811 -0.596 -1.546 8
0.801 -0.744 -1.608 9
0.798 -0.792 -1.69 8
0.837 -0.79 -1.791 9
0.754 -0.711 -1.612 8
0.763 -0.703 -1.742 8
0.659 -0.759 -1.935 7
0.458 -0.759 -2.037 10
0.099 -0.804 -2.081 9
-0.266 -1.041 -2.186 8
-0.411 -1.173 -2.307 8
-0.37 -1.056 -2.076 9
-0.438 -1.1 -1.984 8
-0.517 -1.226 -1.669 9
-0.52 -1.267 -1.474 8
-0.421 -1.071 -1.336 8
-0.247 -0.838 -1.222 9
-0.222 -0.754 -1.1 8
0.028 -0.664 -1.149 7
0.176 -0.672 -1.379 10
0.127 -0.622 -1.586 8
0.086 -0.502 -1.657 9
0.152 -0.386 -1.572 8
0.266 -0.322 -1.369 8
0.239 -0.29 -1.232 9
0.389 -0.28 -0.896 8
0.508 -0.249 -0.429 9
0.473 -0.126 -0.049 8
0.303 0.207 0.318 8
0.162 0.6 0.746 9
0.146 0.54 0.672 7
0.204 0.755 0.986 10
0.415 0.791 1.203 8
0.596 0.678 1.303 8
0.789 0.333 1.271 9
0.997 -0.102 1.128 8
0.958 -0.348 0.637 9
0.806 -0.277 0.026 8
0.725 -0.249 0.023 8
0.74 0.211 -0.287 9
0.575 1.025 0.017 8
-0.08 2.032 0.912 9
-1.088 2.871 1.913 6
-2.129 3.197 2.898 10
-1.916 2.877 2.608 9
-2.24 2.567 3.765 8
-1.51 2.015 4.679 8
-0.352 1.99 5.136 9
0.865 2.422 5.33 8
2.052 2.712 5.203 9
2.881 2.781 4.946 8
2.593 2.503 4.451 8
2.765 2.634 4.243 9
2.399 2.779 3.997 8
1.929 2.765 3.7 7
1.582 2.722 3.3 10
1.514 2.774 2.836 8
1.941 2.812 2.521 9
1.747 2.53 2.269 8
2.562 2.781 2.457 9
3.329 2.848 2.869 8
3.798 2.083 3.074 8
3.912 0.893 3.083 9
3.566 0.314 2.918 8
3.209 0.283 2.626 9
2.491 0.592 2.247 8
1.941 0.911 1.397 7
2.064 0.8 0.314 10
2.578 0.779 -0.506 8
2.899 0.667 -0.927 9
3.01 -0.005 -0.832 8
2.709 -0.005 -0.749 8
2.655 -0.4 -0.111 9
2.316 0.123 0.675 8
1.867 0.546 0.724 9
1.088 0.527 0.207 8
-0.017 0.434 -0.146 8
-1.0 -0.059 -0.125 9
-0.9 -0.053 -0.112 6
-1.604 -0.888 0.375 10
-1.941 -1.834 0.903 9
-1.892 -2.719 0.884 8
-1.512 -3.297 0.045 9
-1.112 -3.331 -1.322 8
-1.136 -2.986 -2.838 8
-1.022 -2.687 -2.554 9
-1.488 -2.322 -4.056 8
-1.936 -1.891 -5.26 9
-2.073 -1.48 -6.031 8
-2.096 -1.259 -6.411 8
-1.886 -1.133 -5.77 7
-2.151 -1.01 -5.774 10
-2.75 -0.705 -5.204 9
-3.495 -0.408 -4.31 8
-4.182 -0.388 -3.472 8
-4.779 -0.346 -2.615 9
-5.037 -0.188 -1.655 8
-4.286 -0.12 -1.072 9
-3.857 -0.108 -0.964 8
-2.077 -0.046 -1.055 8
-0.083 0.143 -1.213 9
1.324 0.307 -1.03 8
1.923 0.218 -0.636 7
1.672 0.079 -0.027 10
0.823 0.095 0.663 8
0.741 0.085 0.597 9
-0.129 0.035 1.02 8
-0.747 -0.005 0.952 8
-1.117 0.131 0.489 9
-1.168 0.34 -0.121 8
-0.716 0.498 -0.614 9
0.059 0.643 -0.754 8
0.053 0.579 -0.679 8
0.635 0.725 -0.386 9
0.721 0.766 0.132 7
0.458 0.823 0.507 10
0.186 0.963 0.434 8
0.028 1.062 -0.186 8
0.026 0.955 -0.167 9
-0.065 0.961 -1.06 8
-0.156 1.061 -2.162 9
-0.369 1.466 -3.298 8
-0.598 2.072 -3.894 8
-0.662 2.519 -3.6 9
-0.656 2.268 -2.643 8
-0.59 2.041 -2.378 8
-0.685 1.281 -1.147 7
-1.004 0.534 0.299 10
-1.411 0.051 1.711 9
-1.422 -0.317 2.619 8
-0.969 -0.737 2.544 8
-0.485 -0.998 1.606 9
-0.437 -0.898 1.446 8
-0.205 -0.998 0.317 9
-0.228 -1.022 -0.593 8
-0.485 -1.093 -1.115 8
-0.837 -1.231 -1.179 9
-1.063 -1.369 -0.893 8
-0.956 -1.232 -0.804 7
-1.075 -1.305 -0.568 10
-1.2 -1.134 -0.737 8
-1.325 -0.724 -1.107 9
-1.365 -0.195 -1.322 8
-1.19 0.28 -1.283 9
-0.763 0.54 -1.01 8
-0.687 0.486 -0.909 8
-0.188 0.564 -0.396 9
0.251 0.513 0.35 8
0.547 0.403 1.03 8
0.668 0.28 1.292 9
0.663 0.177 1.199 7
0.543 0.159 1.029 10
0.489 0.143 0.926 8
0.316 0.205 0.743 8
0.153 0.24 0.485 9
0.0 0.183 0.238 8
0.003 0.079 0.118 9
0.223 -0.019 -0.024 8
0.441 -0.019 -0.205 8
0.397 -0.017 -0.185 9
0.479 0.107 -0.265 8
0.439 0.255 -0.32 9
0.36 0.376 -0.49 6
0.331 0.538 -0.665 10
0.35 0.729 -0.576 9
0.315 0.656 -0.518 8
0.34 0.747 -0.363 9
0.343 0.626 -0.488 8
0.323 0.384 -0.761 8
0.237 0.217 -0.939 9
0.047 0.138 -1.018 8
-0.118 0.089 -0.993 9
-0.106 0.08 -0.893 8
-0.157 0.041 -0.791 8
-0.054 0.069 -0.526 7
0.206 0.227 -0.035 10
0.57 0.43 0.371 9
0.967 0.581 0.403 8
1.319 0.636 0.073 8
1.187 0.572 0.066 9
1.381 0.536 -0.31 8
1.244 0.391 -0.488 8
0.837 0.094 -0.443 9
0.272 -0.234 -0.198 8
-0.409 -0.463 0.175 9
-0.368 -0.416 0.157 8
-0.895 -0.418 0.45 7
-1.047 -0.237 0.711 10
-0.757 -0.21 0.892 8
-0.138 -0.306 0.848 9
0.382 -0.375 0.898 8
0.483 -0.552 1.021 8
0.434 -0.497 0.919 9
0.14 -0.634 1.04 8
-0.294 -0.48 1.535 9
-0.472 -0.401 2.037 8
-0.088 -0.651 1.812 8
0.618 -0.773 1.167 9
0.556 -0.696 1.05 6
1.185 -0.344 0.542 11
1.419 0.198 0.164 8
1.329 0.86 0.148 8
1.065 1.8 0.798 9
0.849 2.472 1.747 8
1.37 2.153 2.219 8
2.186 1.433 2.297 9
1.968 1.29 2.067 8
2.213 1.048 2.229 9
2.052 0.874 2.19 8
1.872 0.517 1.735 8
1.652 0.244 0.92 7
1.342 0.071 0.043 10
1.208 0.064 0.038 9
0.913 -0.214 -0.6 8
0.523 -0.761 -0.946 8
-0.129 -1.248 -1.273 9
-0.968 -1.416 -1.598 8
-1.582 -1.481 -1.59 9
-1.825 -1.363 -1.395 8
-1.642 -1.227 -1.256 8
-1.705 -0.804 -1.289 9
-1.708 -0.052 -1.536 8
-1.684 0.756 -1.809 7
-1.413 0.915 -1.78 10
-1.069 0.59 -1.526 8
-0.939 0.265 -1.128 9
-0.845 0.238 -1.015 8
-0.786 -0.058 -0.421 8
-0.678 -0.228 0.03 9
-0.452 -0.481 0.201 8
-0.176 -0.806 0.135 9
-0.027 -0.979 -0.019 8
-0.024 -0.881 -0.017 8
-0.072 -0.925 -0.075 9
-0.253 -0.861 -0.068 7
-0.323 -0.823 -0.063 10
-0.17 -0.853 0.03 8
0.081 -0.919 0.255 8
0.315 -0.886 0.65 9
0.284 -0.797 0.585 8
0.513 -0.811 0.777 9
0.714 -0.98 0.717 8
0.771 -0.994 0.829 8
0.614 -0.794 0.997 9
0.292 -0.504 1.047 8
-0.067 -0.197 1.009 9
-0.06 -0.177 0.908 6
-0.219 -0.027 0.883 10
-0.116 -0.011 0.76 9
0.167 0.02 0.486 8
0.484 0.033 0.315 9
0.628 -0.001 0.336 8
0.565 -0.001 0.406 8
0.492 -0.044 0.365 9
0.234 -0.082 0.459 8
-0.054 -0.104 0.535 8
-0.225 -0.119 0.478 9
-0.284 -0.175 0.35 8
-0.256 -0.157 0.315 7
-0.243 -0.25 0.24 10
-0.133 -0.295 0.178 8
0.098 -0.249 0.091 9
0.346 -0.204 -0.084 8
0.495 -0.214 -0.298 9
0.457 -0.149 -0.352 8
0.186 -0.026 -0.178 8
0.167 -0.023 -0.16 9
-0.135 0.043 0.089 8
-0.31 0.01 0.264 9
-0.388 -0.08 0.324 8
-0.379 -0.152 0.269 7
-0.283 -0.217 0.175 10
-0.066 -0.242 0.049 8
-0.059 -0.218 0.044 9
0.196 -0.192 -0.065 8
0.325 -0.158 -0.081 8
0.31 -0.099 -0.04 9
0.213 -0.003 -0.007 8
0.032 0.108 -0.036 9
0.029 0.098 -0.032 8
-0.102 0.144 -0.048 8
-0.087 0.131 -0.074 9
-0.042 0.141 -0.193 6
0.068 0.153 -0.285 10
0.226 0.146 -0.337 9
0.31 0.15 -0.372 8
0.279 0.135 -0.335 9
0.315 0.15 -0.303 8
0.348 0.158 -0.204 8
0.393 0.154 -0.101 9
0.398 0.14 -0.106 8
0.376 0.131 -0.144 9
0.333 0.12 -0.15 8
0.3 0.108 -0.135 8
0.207 0.103 -0.184 7
0.117 0.106 -0.282 10
0.06 0.106 -0.338 9
0.048 0.093 -0.284 8
0.1 0.07 -0.176 8
0.09 0.063 -0.158 9
0.124 0.077 -0.074 8
0.168 0.069 -0.003 9
0.25 -0.001 0.032 8
0.274 -0.039 0.117 8
0.245 -0.036 0.294 9
0.176 -0.04 0.487 8
0.158 -0.036 0.438 7
0.04 -0.052 0.627 10
-0.101 -0.056 0.686 8
-0.26 -0.056 0.574 9
-0.404 -0.047 0.363 8
-0.467 -0.014 0.049 8
-0.457 0.013 -0.253 9
-0.411 0.012 -0.228 8
-0.399 0.024 -0.347 9
-0.429 0.026 -0.292 8
-0.455 0.017 -0.114 8
-0.407 -0.02 0.073 9
-0.367 -0.018 0.066 7
0.006 -0.161 0.24 10
0.006 -0.144 0.216 8
0.118 -0.163 0.207 8
0.173 -0.17 0.131 9
0.158 -0.161 0.0 8
0.015 -0.156 -0.106 9
-0.188 -0.147 -0.149 8
-0.169 -0.132 -0.134 8
-0.319 -0.067 -0.133 9
-0.374 0.016 -0.112 8
-0.339 0.07 -0.126 9
-0.269 0.109 -0.187 6
-0.178 0.128 -0.229 10
-0.077 0.113 -0.212 9
-0.07 0.102 -0.19 8
-0.064 0.076 -0.084 8
-0.157 0.061 0.082 9
-0.243 0.052 0.201 8
-0.279 0.03 0.245 9
-0.27 0.019 0.237 8
-0.236 0.029 0.182 9
-0.212 0.026 0.164 8
-0.195 0.042 0.042 8
-0.203 0.069 -0.166 7
-0.196 0.087 -0.307 10
-0.214 0.092 -0.275 8
-0.319 0.078 -0.098 9
-0.287 0.07 -0.088 8
-0.406 0.008 0.172 9
-0.494 -0.076 0.484 8
-0.551 -0.096 0.731 8
-0.48 -0.053 0.671 9
-0.283 -0.012 0.373 8
-0.071 0.027 0.091 9
-0.064 0.024 0.082 8
0.072 0.057 -0.146 7
0.079 0.079 -0.346 10
-0.061 0.097 -0.491 8
-0.307 0.086 -0.527 9
-0.56 0.064 -0.398 8
-0.768 0.146 -0.152 8
-0.691 0.131 -0.137 9
-0.842 0.222 0.165 8
-0.732 0.072 0.294 8
-0.3 -0.184 0.248 9
0.141 -0.271 0.166 8
0.372 -0.173 -0.079 9
0.335 -0.156 -0.071 6
0.334 0.02 -0.416 10
0.117 0.151 -0.644 9
-0.173 0.143 -0.687 8
-0.445 0.054 -0.489 9
-0.646 -0.058 -0.088 8
-0.823 -0.057 0.377 8
-0.741 -0.051 0.339 9
-0.775 -0.043 0.767 8
-0.46 -0.165 0.84 9
0.064 -0.283 0.605 8
0.581 -0.39 0.38 8
0.951 -0.475 0.224 7
1.072 -0.443 0.173 10
0.965 -0.398 0.156 9
0.694 -0.15 0.191 8
0.07 0.183 0.198 8
-0.464 0.371 0.185 9
-0.658 0.39 0.128 8
-0.618 0.322 -0.055 8
-0.465 0.237 -0.278 9
-0.418 0.213 -0.25 8
-0.22 0.208 -0.472 9
0.038 0.308 -0.606 8
0.237 0.338 -0.484 7
0.425 0.113 -0.057 10
0.391 -0.041 0.368 8
0.352 -0.037 0.331 9
-0.003 0.0 0.576 8
-0.421 -0.015 0.723 8
-0.818 -0.033 0.776 9
-0.892 -0.027 0.571 8
-0.614 -0.028 0.127 9
-0.36 -0.032 -0.193 8
-0.324 -0.029 -0.174 8
-0.201 0.005 -0.262 9
-0.111 0.035 -0.352 6
-0.059 0.04 -0.483 11
-0.068 0.058 -0.526 8
-0.104 0.101 -0.523 8
-0.165 0.233 -0.519 9
-0.148 0.21 -0.467 8
# end
#Thu Feb 26 20:35:19 GMT+08:00 20159
