# Supplementary material for: Abnormal Gait Behavior Detection for Elderly Based on Enhanced Wigner-Ville Analysis and Cloud Incremental SVM Learning
Source: Hindawi journal article supplement (doi:10.1155/2016/5869238), 2016-01-01
Supplement: f1 [file 5869238.f1.zip › Supplementary Materials/Original Data/Backward fall Ending Lying/original__97.txt]

# Accelerometer Values
# filename:  original__97.txt
# Saving start time: Thu Feb 26 20:35:22 GMT+08:00 2015

# sensor resolution: 0.0095825195m/s^2
#Sensorvendor: KIONIX, name: KX023 Accelerometer, type: 1,version : 1, range 39.240005

# X value, Y value, Z value, time diff in ms
-0.054 -0.126 -0.34 8
-0.049 -0.114 -0.381 8
-0.013 -0.102 -0.342 9
0.016 -0.048 -0.304 6
0.048 -0.09 -0.215 10
0.097 -0.16 -0.111 9
0.152 -0.219 -0.017 8
0.19 -0.245 0.038 9
0.171 -0.22 0.034 8
0.179 -0.236 0.051 8
0.182 -0.254 0.059 9
0.189 -0.265 0.042 8
0.165 -0.25 -0.012 9
0.159 -0.202 -0.096 8
0.229 -0.127 -0.182 8
0.206 -0.114 -0.164 7
0.281 0.004 -0.218 10
0.293 0.118 -0.245 9
0.253 0.158 -0.229 8
0.179 0.163 -0.157 8
0.107 0.171 -0.064 9
0.071 0.171 0.01 8
0.064 0.154 0.009 9
0.073 0.143 0.022 8
0.088 0.118 -0.007 8
0.08 0.094 -0.034 9
0.07 0.064 -0.06 8
0.063 0.058 -0.079 7
0.124 -0.016 -0.078 10
0.111 -0.015 -0.07 8
0.107 -0.056 -0.06 9
0.083 -0.091 -0.038 8
0.064 -0.088 0.0 8
0.046 -0.031 0.053 9
0.038 -0.004 0.08 8
0.035 -0.004 0.072 9
0.056 -0.062 0.065 8
0.073 -0.124 0.096 8
0.062 -0.151 0.107 9
0.029 -0.179 0.087 7
-0.034 -0.21 0.072 10
-0.109 -0.224 0.058 8
-0.098 -0.201 0.053 8
-0.136 -0.184 0.025 9
-0.134 -0.144 -0.008 8
-0.14 -0.109 -0.049 9
-0.201 -0.071 -0.078 8
-0.301 -0.025 -0.059 8
-0.423 -0.001 -0.004 9
-0.38 -0.001 -0.003 8
-0.506 0.006 0.071 9
-0.587 0.011 0.144 6
-0.613 0.02 0.185 10
-0.604 0.042 0.19 9
-0.581 0.088 0.161 8
-0.549 0.159 0.097 9
-0.494 0.143 0.087 8
-0.459 0.193 0.032 8
-0.43 0.219 0.019 9
-0.431 0.231 0.061 8
-0.516 0.202 0.145 8
-0.638 0.154 0.213 9
-0.574 0.138 0.246 8
-0.656 0.124 0.222 7
-0.651 0.021 0.176 10
-0.496 -0.057 0.007 8
-0.26 -0.123 -0.185 9
-0.096 -0.182 -0.336 8
-0.019 -0.29 -0.523 9
-0.017 -0.261 -0.471 8
0.015 -0.407 -0.734 8
0.012 -0.513 -0.955 9
-0.003 -0.577 -1.067 8
0.0 -0.671 -1.141 9
0.018 -0.807 -1.286 8
0.016 -0.726 -1.157 7
0.039 -0.856 -1.369 10
0.074 -0.936 -1.506 8
0.117 -0.98 -1.583 9
0.147 -1.064 -1.728 8
0.176 -1.182 -1.822 8
0.15 -1.313 -1.991 9
0.096 -1.458 -2.265 8
0.086 -1.312 -2.038 9
0.066 -1.378 -1.992 8
-0.001 -1.344 -1.702 8
-0.058 -1.274 -1.446 9
0.007 -1.169 -1.185 6
0.237 -1.044 -0.803 10
0.547 -0.887 -0.421 9
0.492 -0.799 -0.379 8
0.796 -0.459 -0.106 9
0.932 -0.197 -0.061 8
0.837 -0.327 -0.359 8
0.657 -0.657 -0.867 9
0.493 -0.987 -1.317 8
0.444 -0.888 -1.185 9
0.307 -1.073 -1.389 8
0.155 -0.989 -1.355 8
0.139 -0.763 -1.103 7
0.213 -0.589 -0.913 10
0.19 -0.541 -0.912 9
0.094 -0.687 -1.042 8
0.085 -0.618 -0.938 8
-0.014 -0.711 -1.202 9
0.002 -0.361 -1.398 8
0.073 0.444 -1.405 9
0.014 1.258 -1.118 8
-0.174 1.647 -0.368 8
-0.253 1.399 0.806 9
-0.228 1.259 0.725 8
-0.219 0.678 1.537 7
-0.335 0.433 1.62 10
-0.346 0.492 1.486 8
0.012 0.727 1.182 9
0.496 1.064 0.732 8
0.77 1.233 0.559 8
0.693 1.11 0.503 9
0.636 1.106 0.587 8
0.161 0.875 0.833 9
-0.528 0.588 1.494 8
-0.919 0.568 2.323 8
-0.705 0.812 3.096 9
-0.635 0.731 2.786 7
0.198 1.219 3.69 10
1.568 1.914 4.607 8
3.102 2.658 5.183 8
4.535 3.065 5.189 9
5.339 2.75 4.76 8
5.159 2.226 4.432 9
4.643 2.003 3.989 8
3.865 1.731 4.104 8
2.894 1.512 4.3 9
2.138 1.347 4.387 8
1.803 1.206 4.443 9
1.875 1.154 4.495 6
2.164 1.263 4.563 10
1.947 1.136 4.107 9
2.334 1.05 4.246 8
2.608 0.838 4.354 8
2.576 1.033 4.271 9
2.353 1.374 3.596 8
2.068 1.583 2.351 9
1.554 1.83 1.055 8
1.398 1.647 0.95 8
0.754 1.933 -0.127 9
0.217 2.128 -0.74 8
-0.084 2.11 -0.677 7
-0.087 1.894 -0.144 10
0.154 1.734 0.443 8
0.727 1.311 0.545 9
0.654 1.18 0.491 8
1.222 0.214 -0.185 9
1.019 -0.471 -1.096 8
0.02 -1.223 -2.056 8
-1.35 -2.274 -2.761 9
-2.638 -2.663 -2.655 8
-3.082 -2.377 -2.136 9
-2.774 -2.14 -1.923 8
-1.99 -1.84 -1.762 7
-0.509 -1.647 -2.308 10
0.81 -1.474 -3.281 8
1.483 -1.862 -4.49 8
1.278 -2.992 -5.777 9
1.15 -2.692 -5.199 8
0.134 -3.755 -6.114 9
-1.584 -3.216 -5.886 8
-3.369 -1.392 -4.862 8
-4.115 0.049 -3.898 9
-3.584 0.493 -3.378 8
-2.513 0.419 -3.182 9
-2.262 0.377 -2.864 6
-1.414 0.262 -2.598 10
-1.039 0.018 -2.31 9
-1.313 -0.176 -1.999 8
-2.094 -0.134 -1.562 9
-2.775 0.224 -1.218 8
-2.967 0.799 -1.335 8
-2.67 0.719 -1.201 9
-2.406 1.204 -1.751 8
-1.911 1.578 -2.361 9
-1.505 1.842 -2.821 8
-1.343 1.895 -2.973 8
-1.489 1.725 -2.789 7
-1.889 1.412 -2.356 10
-1.7 1.271 -2.12 9
-2.216 1.037 -1.584 8
-2.624 1.096 -1.058 8
-2.591 1.4 -0.578 9
-2.008 1.618 -0.263 8
-1.049 1.673 -0.061 8
0.143 1.636 0.26 9
0.129 1.473 0.234 8
1.324 1.34 0.773 9
2.173 1.047 1.443 8
2.259 0.613 1.945 7
1.435 0.099 2.133 10
-0.063 -0.317 2.279 8
-1.711 -0.42 2.476 9
-1.54 -0.378 2.229 8
-2.684 -0.269 2.293 8
-2.984 0.039 2.255 9
-2.456 0.493 2.205 8
-1.139 0.669 1.995 9
0.635 0.369 1.524 8
0.572 0.332 1.372 8
2.289 -0.148 0.952 9
3.465 -0.572 0.808 6
3.554 -0.869 0.735 11
2.624 -1.044 0.684 8
1.198 -1.267 0.696 8
-0.31 -1.61 0.692 9
-0.279 -1.449 0.623 8
-1.809 -1.34 0.634 9
-2.896 -0.542 0.633 8
-2.629 -0.01 0.241 8
-1.178 0.12 -0.638 9
0.826 0.231 -1.436 8
2.638 0.122 -2.136 9
2.374 0.109 -1.922 6
2.906 -0.159 -2.828 10
2.492 -0.196 -3.379 9
1.931 -0.628 -3.496 8
0.822 -1.065 -3.463 8
-0.526 -0.747 -3.094 9
-1.465 -0.265 -2.737 8
-1.318 -0.239 -2.463 9
-1.679 0.582 -2.274 8
-1.438 1.891 -1.962 8
-0.648 2.492 -1.498 9
0.581 1.896 -1.05 8
0.523 1.706 -0.945 7
2.178 0.136 -0.449 10
1.961 0.123 -0.404 8
1.124 -0.208 -0.131 9
-0.398 -0.012 0.296 8
-1.954 0.518 0.733 9
-3.052 1.447 1.131 8
-2.809 2.213 1.415 8
-2.528 1.992 1.273 9
-0.883 2.127 1.232 8
1.285 2.093 1.27 8
3.162 1.92 1.789 9
4.22 1.383 2.411 7
4.426 0.715 2.788 10
3.896 0.189 2.843 8
3.506 0.17 2.558 8
2.434 -0.131 2.406 9
1.003 -0.236 1.982 8
-0.444 -0.234 1.143 9
-1.565 -0.118 0.164 8
-2.268 0.112 -0.713 8
-2.859 0.234 -1.435 9
-2.573 0.211 -1.291 8
-2.937 0.598 -1.413 9
-2.745 1.192 -0.917 6
-2.105 0.94 -0.591 10
-1.321 0.159 -0.544 9
-0.908 -0.396 -0.134 8
-0.847 -0.893 0.699 9
-0.762 -0.804 0.629 8
-0.774 -1.345 1.309 8
-0.711 -1.793 1.673 9
-0.466 -2.079 1.897 8
-0.092 -2.253 1.821 9
0.252 -2.29 1.384 8
0.227 -2.061 1.245 8
0.398 -1.951 0.604 7
0.33 -1.732 -0.106 10
0.162 -1.607 -0.693 8
-0.026 -1.396 -0.898 9
-0.214 -0.997 -0.716 8
-0.215 -0.772 -0.353 9
-0.194 -0.695 -0.318 8
0.14 -0.842 0.007 8
0.587 -0.975 0.317 9
0.993 -0.826 0.756 8
1.339 -0.774 0.877 9
1.568 -0.86 0.58 8
1.411 -0.774 0.522 7
1.464 -0.738 0.243 10
1.24 -0.482 0.085 8
0.978 -0.186 0.007 9
0.89 -0.003 -0.157 8
0.954 0.094 -0.347 8
0.969 0.15 -0.324 9
0.9 0.182 -0.148 8
0.81 0.164 -0.133 9
0.809 0.141 -0.036 8
0.775 0.055 -0.105 8
0.614 0.001 -0.113 9
0.326 0.047 -0.093 6
0.047 0.067 -0.264 11
-0.113 0.029 -0.311 8
-0.102 0.026 -0.28 8
-0.202 0.016 -0.056 9
-0.245 -0.012 0.185 8
-0.205 -0.033 0.381 8
0.029 -0.014 0.607 9
0.41 -0.028 0.674 8
0.369 -0.025 0.481 9
0.663 -0.04 0.433 8
0.773 0.033 0.257 8
0.845 0.011 0.137 7
0.956 -0.16 0.024 10
0.936 -0.195 -0.129 9
0.786 -0.081 -0.284 8
0.708 -0.073 -0.256 8
0.567 -0.006 -0.221 9
0.477 0.026 -0.097 8
0.479 0.071 -0.026 9
0.593 0.089 -0.03 8
0.673 0.122 -0.15 8
0.608 0.168 -0.329 9
0.547 0.151 -0.296 8
0.386 0.173 -0.495 7
0.191 0.186 -0.657 10
0.011 0.209 -0.712 8
-0.126 0.231 -0.696 9
-0.211 0.242 -0.641 8
-0.26 0.229 -0.557 8
-0.234 0.206 -0.501 9
-0.241 0.166 -0.347 8
-0.201 0.107 -0.139 9
-0.13 0.029 0.066 8
-0.022 -0.041 0.231 8
0.113 -0.067 0.266 9
0.102 -0.061 0.239 7
0.215 -0.037 0.095 10
0.264 -0.002 -0.131 8
0.208 0.014 -0.251 8
0.067 0.021 -0.2 9
-0.067 0.012 -0.065 8
-0.141 -0.017 0.044 9
-0.127 -0.073 0.167 8
-0.114 -0.066 0.15 8
-0.163 -0.124 0.316 9
-0.119 -0.16 0.432 8
-0.02 -0.153 0.45 9
0.083 -0.095 0.343 6
0.14 -0.04 0.105 10
0.126 -0.036 0.094 9
0.127 -0.028 -0.063 8
0.081 -0.01 0.025 9
0.005 0.029 0.218 8
-0.069 0.061 0.39 8
-0.13 0.08 0.461 9
-0.174 0.075 0.519 8
-0.156 0.068 0.467 8
-0.223 0.06 0.525 9
-0.36 0.051 0.416 8
-0.498 0.051 0.246 7
-0.588 0.086 -0.041 10
-0.633 0.136 -0.437 8
-0.661 0.173 -0.669 9
-0.595 0.156 -0.602 8
-0.623 0.197 -0.67 9
-0.583 0.192 -0.658 8
-0.537 0.148 -0.576 8
-0.529 0.108 -0.461 9
-0.458 0.06 -0.347 8
-0.32 0.008 -0.158 9
-0.288 0.007 -0.142 8
-0.145 -0.051 0.118 7
-0.008 -0.117 0.3 10
0.051 -0.181 0.329 8
0.029 -0.228 0.34 9
0.008 -0.28 0.389 8
0.021 -0.335 0.403 8
0.019 -0.301 0.363 9
0.053 -0.321 0.353 8
0.103 -0.295 0.324 8
0.144 -0.245 0.284 9
0.172 -0.187 0.239 8
0.162 -0.142 0.2 9
0.146 -0.128 0.18 6
0.101 -0.097 0.168 10
0.077 -0.066 0.162 9
0.1 -0.036 0.141 8
0.155 0.002 0.111 9
0.207 0.049 0.061 8
0.251 0.098 -0.038 8
0.226 0.088 -0.034 9
0.262 0.141 -0.193 8
0.242 0.186 -0.329 9
0.138 0.219 -0.363 8
0.015 0.245 -0.213 8
-0.076 0.24 0.002 7
-0.128 0.206 0.124 10
-0.115 0.186 0.111 9
-0.088 0.174 0.165 8
0.006 0.161 0.11 8
0.132 0.154 0.013 9
0.143 0.136 -0.188 8
0.123 0.164 -0.426 9
0.238 0.166 -0.491 8
0.214 0.149 -0.442 8
0.207 0.081 -0.383 9
-0.006 0.036 -0.121 8
-0.302 0.007 0.168 7
-0.561 0.022 0.275 10
-0.659 0.024 0.303 8
-0.593 0.022 0.273 9
-0.571 -0.055 0.169 8
-0.4 -0.116 0.042 8
-0.138 -0.111 -0.022 9
0.073 -0.105 -0.113 8
0.21 -0.109 -0.077 9
0.234 -0.127 0.081 8
0.211 -0.114 0.073 8
0.046 -0.11 0.127 9
-0.253 -0.062 0.079 7
-0.452 -0.017 0.094 10
-0.43 -0.006 0.126 8
-0.265 -0.025 0.053 8
-0.145 -0.026 -0.017 9
-0.13 -0.024 -0.015 8
-0.127 -0.019 0.047 9
-0.195 -0.04 0.136 8
-0.264 -0.037 0.118 8
-0.331 0.128 0.082 9
-0.422 0.186 -0.026 8
-0.418 0.007 -0.112 9
-0.376 0.006 -0.101 6
-0.339 -0.029 -0.104 10
-0.346 -0.048 0.179 9
-0.304 -0.224 0.573 8
-0.352 -0.207 0.754 8
-0.485 -0.072 0.876 9
-0.436 -0.065 0.788 8
-0.554 -0.016 0.677 9
-0.628 0.032 0.341 8
-0.633 0.06 -0.039 8
-0.645 0.096 -0.393 9
-0.662 0.157 -0.66 8
-0.596 0.142 -0.594 7
-0.576 0.205 -0.728 10
-0.379 0.239 -0.771 8
-0.032 0.256 -0.744 9
0.267 0.283 -0.525 8
0.401 0.312 -0.167 9
0.352 0.334 0.086 8
0.119 0.376 0.14 8
0.107 0.338 0.126 9
-0.187 0.343 -0.056 8
-0.405 0.327 -0.37 8
-0.479 0.389 -0.597 9
-0.355 0.466 -0.679 7
-0.157 0.521 -0.658 10
-0.028 0.593 -0.569 8
# end
#Thu Feb 26 20:35:26 GMT+08:00 20157
