# Supplementary material for: Abnormal Gait Behavior Detection for Elderly Based on Enhanced Wigner-Ville Analysis and Cloud Incremental SVM Learning
Source: Hindawi journal article supplement (doi:10.1155/2016/5869238), 2016-01-01
Supplement: f1 [file 5869238.f1.zip › Supplementary Materials/Original Data/Backward fall Ending Lying/original__98.txt]

# Accelerometer Values
# filename:  original__98.txt
# Saving start time: Thu Feb 26 20:35:33 GMT+08:00 2015

# sensor resolution: 0.0095825195m/s^2
#Sensorvendor: KIONIX, name: KX023 Accelerometer, type: 1,version : 1, range 39.240005

# X value, Y value, Z value, time diff in ms
-0.173 0.261 -0.288 8
-0.148 0.23 -0.301 9
-0.138 0.188 -0.287 8
-0.125 0.132 -0.259 9
-0.114 0.078 -0.216 8
-0.102 0.07 -0.195 8
-0.071 0.02 -0.163 7
0.037 -0.022 -0.15 10
0.179 -0.03 -0.143 9
0.27 -0.002 -0.137 8
0.304 0.072 -0.133 8
0.289 0.146 -0.121 9
0.26 0.132 -0.109 8
0.181 0.149 -0.107 8
0.051 0.127 -0.112 9
-0.079 0.103 -0.096 8
-0.15 0.072 -0.067 9
-0.143 0.016 -0.033 8
-0.128 0.014 -0.03 7
-0.063 -0.036 -0.003 10
0.08 -0.055 0.002 8
0.269 -0.047 -0.01 9
0.386 -0.026 -0.025 8
0.358 -0.009 -0.035 8
0.208 -0.028 -0.041 9
0.187 -0.025 -0.037 8
-0.022 -0.071 -0.037 9
-0.193 -0.118 -0.029 8
-0.275 -0.169 -0.013 8
-0.316 -0.222 -0.017 9
-0.317 -0.28 -0.075 6
-0.285 -0.328 -0.181 11
-0.256 -0.295 -0.163 8
-0.227 -0.313 -0.28 8
-0.202 -0.312 -0.372 9
-0.178 -0.308 -0.384 8
-0.147 -0.3 -0.294 9
-0.045 -0.278 -0.104 8
-0.027 -0.484 0.002 8
-0.025 -0.436 0.001 9
-0.074 -0.702 -0.018 8
-0.197 -0.761 -0.097 8
-0.388 -0.818 -0.378 7
-0.343 -0.882 -0.62 10
-0.161 -0.853 -0.666 9
-0.145 -0.768 -0.6 8
0.056 -0.692 -0.54 8
0.378 -0.59 -0.95 9
0.643 -0.421 -0.686 8
0.653 -0.322 -0.6 9
0.491 -0.326 -0.696 8
0.215 -0.37 -0.748 8
0.194 -0.333 -0.673 9
-0.038 -0.425 -0.562 8
-0.061 -0.528 -0.412 7
0.148 -0.621 -0.293 10
0.475 -0.714 -0.269 8
0.746 -0.81 -0.536 9
0.903 -0.922 -0.908 8
0.812 -0.83 -0.817 9
0.886 -0.925 -1.078 8
0.864 -0.969 -1.313 8
0.847 -1.042 -1.506 9
0.78 -1.022 -1.672 8
0.491 -0.897 -1.888 8
0.189 -0.806 -2.076 9
0.17 -0.726 -1.869 7
-0.008 -0.658 -1.93 10
-0.104 -0.614 -1.986 8
-0.078 -0.574 -2.263 8
0.045 -0.546 -2.554 9
0.229 -0.481 -2.759 8
0.206 -0.433 -2.483 9
0.289 -0.318 -2.528 8
0.231 -0.208 -2.25 8
0.114 -0.131 -1.83 9
-0.073 -0.08 -1.37 8
-0.333 0.006 -0.88 9
-0.3 0.006 -0.792 6
-0.646 0.411 -0.296 10
-0.988 1.054 0.101 9
-1.041 1.503 0.259 8
-0.744 1.754 0.239 9
-0.327 1.876 0.182 8
0.04 1.905 0.189 8
0.325 1.974 0.498 9
0.293 1.777 0.448 8
0.642 1.992 1.039 8
1.091 2.351 1.462 9
1.61 2.979 2.081 8
2.257 3.693 3.091 7
2.946 3.989 3.913 10
3.311 3.765 4.148 8
2.98 3.388 3.733 9
2.734 2.955 3.42 8
1.88 2.523 3.047 9
0.795 2.091 2.836 8
-0.171 1.783 2.928 8
-0.693 1.761 3.347 9
-0.478 1.826 3.719 8
-0.43 1.643 3.347 9
0.384 1.702 3.639 8
1.346 1.632 3.784 7
1.956 1.379 3.708 10
1.975 1.06 3.741 8
1.428 0.696 4.089 9
1.285 0.626 3.68 8
0.44 0.281 4.114 8
-0.38 0.068 4.244 9
-0.961 0.01 3.935 8
-1.176 0.055 3.245 9
-1.046 0.099 2.439 8
-0.675 0.18 1.779 8
-0.608 0.162 1.601 9
-0.149 0.333 1.233 6
0.238 0.513 1.051 10
0.485 0.782 0.707 9
0.537 1.151 -0.049 8
0.462 1.47 -1.004 9
0.313 1.778 -1.8 8
0.281 1.601 -1.62 8
0.129 1.754 -2.277 9
0.09 1.476 -2.793 8
0.106 1.01 -3.038 9
0.096 0.496 -2.892 8
0.139 0.044 -2.219 8
0.125 0.04 -1.997 7
0.049 -0.241 -1.267 10
-0.294 -0.382 -1.011 9
-0.313 -0.094 -0.87 8
0.434 0.435 -0.994 8
1.735 0.545 -1.515 9
2.971 0.191 -1.93 8
2.674 0.171 -1.737 9
3.288 -0.335 -1.563 8
2.976 -0.805 -1.491 8
1.84 -1.138 -0.926 9
0.381 -1.671 -0.669 8
-0.957 -2.538 -1.012 7
-2.028 -3.2 -1.822 10
-1.825 -2.88 -1.64 8
-2.553 -2.974 -2.69 9
-2.678 -2.432 -3.157 8
-2.332 -1.576 -2.946 8
-1.718 -0.667 -2.442 9
-0.839 0.048 -1.772 8
0.139 0.446 -1.329 9
0.125 0.402 -1.196 8
0.887 0.521 -1.144 8
1.026 0.293 -1.385 9
0.453 -0.084 -1.63 7
-0.484 -0.437 -1.839 10
-1.459 -0.688 -2.147 8
-2.231 -0.6 -2.32 8
-2.008 -0.54 -2.088 9
-2.263 -0.118 -1.917 8
-1.847 0.275 -1.277 9
-1.019 0.355 -0.43 8
-0.278 0.276 0.468 8
-0.005 0.209 1.386 9
-0.004 0.188 1.97 8
-0.149 0.169 1.773 9
-0.546 -0.225 1.785 6
-1.103 -0.438 1.121 10
-1.743 -0.546 0.167 9
-2.255 -0.379 -0.67 8
-2.264 -0.012 -1.434 9
-2.038 -0.011 -1.29 8
-1.493 0.142 -1.761 8
-0.814 0.02 -1.587 9
-0.446 -0.138 -0.972 8
-0.426 -0.349 -0.38 8
-0.627 -0.546 -0.093 9
-0.81 -0.558 -0.234 8
-0.729 -0.502 -0.211 7
-0.764 -0.363 -0.8 10
-0.677 -0.048 -1.648 8
-0.567 0.379 -2.199 9
-0.553 0.659 -1.832 8
-0.804 0.792 -0.463 9
-1.231 0.972 1.696 8
-1.108 0.874 1.527 8
-1.223 0.946 3.929 9
-0.631 0.548 5.68 8
0.424 -0.113 6.172 9
1.089 -0.688 5.27 8
0.98 -0.62 4.743 7
-0.169 -1.324 0.76 10
-0.152 -1.191 0.684 8
-1.443 -1.242 -1.599 9
-2.546 -1.14 -3.383 8
-3.124 -0.919 -4.594 8
-3.075 -0.645 -5.196 9
-2.331 -0.368 -5.157 8
-2.098 -0.331 -4.641 9
-0.829 -0.135 -4.157 8
0.621 0.004 -3.361 8
1.849 0.115 -2.342 9
2.624 0.144 -1.192 6
2.894 0.015 -0.149 10
2.599 -0.283 0.475 9
2.339 -0.255 0.427 8
1.624 -0.441 0.592 9
0.841 -0.387 0.46 8
0.273 -0.237 0.053 8
-0.018 -0.023 -0.449 9
0.002 0.361 -0.828 8
0.328 0.909 -1.121 9
0.295 0.818 -1.009 8
0.82 1.351 -1.354 8
1.248 1.789 -1.812 7
1.373 2.171 -2.314 10
1.259 2.35 -2.621 9
0.86 2.21 -2.5 8
0.281 2.007 -1.939 8
0.253 1.806 -1.745 9
-0.311 1.708 -1.023 8
-0.719 1.616 -0.476 9
-0.784 1.506 -0.201 8
-0.458 1.387 -0.089 8
0.07 1.271 0.012 9
0.063 1.144 0.01 8
0.649 1.127 0.009 7
1.326 1.094 0.546 10
2.021 0.913 0.392 8
2.491 0.631 0.196 9
2.615 0.347 0.265 8
2.455 0.272 0.458 8
2.209 0.245 0.412 9
1.836 0.416 0.387 8
1.398 0.785 0.126 9
1.229 1.137 -0.075 8
1.342 1.249 -0.426 8
1.323 1.18 -1.166 9
1.191 1.062 -1.049 6
0.82 0.792 -1.861 11
-0.076 0.368 -2.47 8
-1.471 0.005 -2.964 8
-2.895 -0.231 -3.182 9
-3.798 -0.447 -2.746 8
-3.865 -0.563 -1.687 9
-3.172 -0.434 -0.563 8
-2.854 -0.391 -0.506 8
-1.655 -0.161 0.252 9
-0.265 -0.006 0.761 8
0.909 0.04 1.011 9
1.606 -0.045 0.849 6
1.762 -0.228 0.639 10
1.55 -0.469 0.728 9
1.395 -0.422 0.655 8
0.943 -0.736 0.831 8
0.261 -0.993 0.892 9
-0.389 -1.104 0.941 8
-0.728 -1.186 0.902 9
-0.823 -1.281 0.564 8
-0.861 -1.323 0.114 8
-0.775 -1.191 0.103 9
-0.845 -1.253 -0.183 8
-0.991 -1.173 -0.174 7
-1.079 -0.924 0.143 10
-1.003 -0.604 0.622 8
-0.76 -0.225 1.074 9
-0.684 -0.202 0.966 8
-0.217 0.058 1.231 9
0.347 0.178 1.293 8
0.773 0.239 1.281 8
1.005 0.262 1.242 9
1.037 0.258 1.137 8
0.909 0.225 1.16 9
0.818 0.202 1.044 8
0.615 0.151 1.304 7
0.335 0.114 1.492 10
0.108 0.082 1.509 8
0.132 -0.002 1.459 9
0.347 -0.123 1.347 8
0.605 -0.249 1.222 8
0.545 -0.224 1.1 9
0.734 -0.172 1.015 8
0.654 -0.033 0.915 8
0.285 -0.014 0.82 9
-0.268 0.043 0.767 8
-0.807 0.106 0.691 9
-0.727 0.096 0.622 6
-0.939 0.056 0.48 10
-0.794 -0.105 0.205 9
-0.504 -0.32 -0.068 8
-0.192 -0.45 -0.103 9
0.092 -0.489 0.02 8
0.25 -0.48 0.179 8
0.219 -0.44 0.369 9
0.197 -0.396 0.332 8
0.06 -0.389 0.558 9
-0.076 -0.446 0.785 8
-0.185 -0.465 0.939 8
-0.212 -0.427 0.96 7
-0.101 -0.408 0.773 10
-0.09 -0.367 0.695 8
0.085 -0.339 0.352 9
0.169 -0.29 0.055 8
0.079 -0.242 -0.096 9
-0.085 -0.211 -0.125 8
-0.144 -0.236 -0.096 9
-0.023 -0.273 -0.038 8
-0.02 -0.245 -0.034 8
0.196 -0.218 0.041 9
0.363 -0.145 0.092 8
0.433 -0.054 0.158 7
0.493 0.041 0.148 10
0.524 0.157 -0.026 8
0.447 0.302 -0.261 9
0.403 0.272 -0.235 8
0.25 0.374 -0.434 8
0.081 0.395 -0.526 9
0.016 0.343 -0.523 8
0.084 0.238 -0.447 9
0.212 0.103 -0.297 8
0.372 -0.018 -0.116 8
0.335 -0.017 -0.104 9
0.431 -0.089 0.03 6
0.367 -0.1 0.098 11
0.23 -0.068 0.122 8
0.107 -0.027 0.101 8
0.001 0.011 0.054 9
-0.121 0.063 -0.009 8
-0.109 0.057 -0.008 8
-0.203 0.105 -0.112 9
-0.179 0.091 -0.186 8
-0.081 0.035 -0.174 9
0.001 -0.046 -0.112 8
0.031 -0.075 -0.024 9
0.027 -0.068 -0.022 6
0.031 -0.022 0.063 10
0.042 0.0 0.131 9
0.069 -0.045 0.16 8
0.104 -0.101 0.109 8
0.109 -0.079 -0.018 9
0.071 -0.013 -0.104 8
0.064 -0.012 -0.094 9
0.032 0.034 -0.074 8
0.012 0.043 -0.038 8
-0.016 0.029 -0.008 9
-0.038 0.063 -0.011 8
-0.048 0.079 -0.074 7
-0.066 0.014 -0.045 10
-0.06 0.013 -0.041 8
-0.096 -0.075 0.081 9
-0.142 -0.131 0.103 8
-0.159 -0.103 -0.044 9
-0.133 -0.032 -0.251 8
-0.046 -0.017 -0.285 8
0.124 -0.094 -0.116 9
0.112 -0.084 -0.105 8
0.291 -0.185 0.098 8
0.361 -0.222 0.269 9
0.305 -0.215 0.379 7
0.211 -0.182 0.339 10
0.161 -0.106 0.253 8
0.145 -0.096 0.247 8
0.144 -0.007 0.222 9
0.187 0.021 0.203 8
0.268 -0.006 0.127 9
0.253 -0.019 0.063 8
0.106 0.014 0.032 8
-0.037 0.054 0.029 9
-0.033 0.048 0.026 8
-0.105 0.04 0.044 9
-0.124 -0.004 0.139 6
-0.217 -0.152 0.273 10
-0.32 -0.184 0.404 9
-0.235 -0.032 0.61 8
-0.104 -0.028 0.652 9
-0.094 -0.025 0.587 8
0.058 -0.14 0.401 8
0.212 -0.239 0.299 9
0.185 -0.306 0.243 8
0.066 -0.406 0.192 9
-0.068 -0.46 0.359 8
-0.219 -0.285 0.571 8
-0.197 -0.257 0.514 7
-0.215 -0.04 0.246 10
-0.091 -0.045 -0.382 8
-0.004 -0.103 -0.665 9
-0.082 -0.049 -0.409 8
-0.313 0.04 0.035 9
-0.571 0.094 0.314 8
-0.514 0.085 0.282 8
-0.677 0.114 0.36 9
-0.648 0.159 0.263 8
-0.489 0.182 -0.057 9
-0.321 0.208 -0.493 8
-0.289 0.187 -0.444 7
-0.125 0.213 -0.873 10
0.016 0.179 -0.786 8
0.063 0.102 -1.24 9
0.073 0.094 -1.059 8
0.098 0.114 -0.697 8
0.155 0.073 -0.271 9
0.253 0.013 0.095 8
0.228 0.012 0.085 9
0.366 -0.071 0.306 8
0.483 -0.185 0.366 8
0.464 -0.245 0.328 9
0.36 -0.192 0.226 6
0.278 -0.065 0.069 11
0.255 0.043 -0.154 8
0.23 0.038 -0.138 8
0.206 0.093 -0.275 9
0.12 0.158 -0.159 8
-0.007 0.214 0.131 8
-0.163 0.208 0.432 9
-0.217 0.164 0.597 8
-0.123 0.111 0.58 9
-0.111 0.1 0.522 8
0.074 0.048 0.395 8
0.289 0.004 0.204 7
0.351 -0.022 0.064 10
0.228 -0.03 0.113 9
0.047 -0.033 0.253 8
-0.177 -0.039 0.368 8
-0.16 -0.035 0.331 9
-0.342 -0.04 0.403 8
-0.358 -0.049 0.339 9
-0.243 -0.055 0.085 8
-0.102 -0.051 -0.182 8
-0.016 -0.065 -0.311 9
-0.015 -0.058 -0.28 8
-0.026 -0.079 -0.264 7
-0.141 -0.058 -0.154 10
-0.266 -0.025 -0.101 8
-0.357 0.001 -0.104 9
-0.366 -0.014 -0.095 8
-0.232 -0.062 -0.054 8
-0.209 -0.055 -0.048 9
-0.062 -0.054 0.044 8
0.025 -0.036 0.127 9
0.026 -0.039 0.157 8
-0.089 -0.009 0.132 8
-0.214 0.042 0.024 9
-0.192 0.037 0.021 7
-0.242 0.063 -0.153 10
-0.209 0.069 -0.377 8
-0.116 0.062 -0.668 8
0.021 0.056 -0.946 9
0.125 0.073 -0.99 8
0.187 0.09 -0.716 9
0.229 0.075 -0.294 8
0.206 0.067 -0.264 8
0.185 0.067 0.161 9
0.173 0.106 0.467 8
0.194 0.148 0.483 9
0.134 0.217 0.273 6
-0.042 0.243 0.021 10
-0.038 0.218 0.019 9
-0.297 0.21 -0.208 8
-0.509 0.241 -0.388 9
-0.558 0.236 -0.498 8
-0.393 0.15 -0.476 8
-0.076 0.041 -0.335 9
0.189 -0.009 -0.169 8
0.17 -0.008 -0.152 8
0.33 -0.043 0.062 9
0.379 -0.084 0.306 8
0.265 -0.069 0.511 7
-0.013 -0.014 0.515 10
-0.3 0.03 0.3 8
-0.402 0.053 0.025 9
-0.362 0.047 0.023 8
-0.272 0.017 -0.199 9
-0.09 -0.054 -0.209 8
-0.039 -0.114 -0.054 8
-0.207 -0.148 0.129 9
-0.404 -0.161 0.299 8
-0.424 -0.163 0.401 9
-0.381 -0.147 0.361 8
# end
#Thu Feb 26 20:35:37 GMT+08:00 20159
