# Supplementary material for: Abnormal Gait Behavior Detection for Elderly Based on Enhanced Wigner-Ville Analysis and Cloud Incremental SVM Learning
Source: Hindawi journal article supplement (doi:10.1155/2016/5869238), 2016-01-01
Supplement: f1 [file 5869238.f1.zip › Supplementary Materials/Original Data/Backward fall Ending Lying/original__99.txt]

# Accelerometer Values
# filename:  original__99.txt
# Saving start time: Thu Feb 26 20:35:40 GMT+08:00 2015

# sensor resolution: 0.0095825195m/s^2
#Sensorvendor: KIONIX, name: KX023 Accelerometer, type: 1,version : 1, range 39.240005

# X value, Y value, Z value, time diff in ms
-0.211 -0.014 -0.459 8
-0.19 -0.012 -0.413 9
-0.033 -0.007 -0.412 8
0.016 -0.01 -0.317 8
-0.037 -0.04 -0.202 9
-0.131 -0.089 -0.108 8
-0.206 -0.122 -0.032 9
-0.237 -0.143 0.018 8
-0.214 -0.129 0.017 8
-0.219 -0.158 0.037 9
-0.2 -0.196 0.034 7
-0.13 -0.218 0.01 10
0.02 -0.208 -0.029 8
0.172 -0.193 -0.068 8
0.155 -0.174 -0.061 9
0.228 -0.173 -0.055 8
0.23 -0.157 -0.126 9
0.183 -0.088 -0.101 8
0.15 -0.042 -0.063 8
0.178 -0.07 -0.026 9
0.215 -0.104 0.012 8
0.193 -0.093 0.01 9
0.193 -0.093 0.05 6
0.166 -0.083 0.087 10
0.14 -0.074 0.102 9
0.155 -0.059 0.093 8
0.219 -0.028 0.067 9
0.293 0.03 0.031 8
0.264 0.027 0.028 8
0.338 0.082 -0.001 9
0.396 0.109 -0.013 8
0.4 0.143 0.0 9
0.331 0.178 0.042 8
0.215 0.173 0.113 8
0.193 0.156 0.102 7
0.062 0.107 0.189 10
-0.043 0.03 0.245 8
-0.097 -0.054 0.242 9
-0.101 -0.105 0.181 8
-0.055 -0.114 0.093 9
0.04 -0.095 0.025 8
0.137 -0.05 -0.012 8
0.123 -0.045 -0.011 9
0.154 -0.031 -0.023 8
0.087 -0.057 -0.003 9
-0.03 -0.074 0.039 8
-0.143 -0.086 0.059 7
-0.218 -0.097 0.037 10
-0.196 -0.088 0.034 8
-0.187 -0.08 -0.003 9
-0.129 -0.063 -0.037 8
-0.063 -0.052 -0.059 8
0.026 -0.043 -0.073 9
0.115 -0.041 -0.07 8
0.143 -0.053 -0.05 9
0.128 -0.048 -0.045 8
0.095 -0.075 -0.013 8
0.031 -0.089 0.033 9
-0.028 -0.085 0.073 6
-0.056 -0.082 0.079 10
-0.083 -0.06 0.055 9
-0.131 0.003 0.031 8
-0.117 0.003 0.028 9
-0.139 0.078 0.02 8
-0.101 0.1 0.021 8
-0.006 0.061 0.01 9
0.1 0.01 -0.002 8
0.132 -0.017 0.0 9
0.079 -0.02 0.021 8
0.071 -0.018 0.019 8
-0.01 -0.03 0.062 7
-0.077 -0.064 0.098 10
-0.129 -0.093 0.09 9
-0.191 -0.102 0.037 8
-0.244 -0.1 -0.044 8
-0.22 -0.09 -0.04 9
-0.255 -0.103 -0.148 8
-0.311 -0.108 -0.247 9
-0.385 -0.079 -0.275 8
-0.479 -0.065 -0.225 8
-0.628 -0.074 -0.099 9
-0.743 -0.085 0.038 8
-0.668 -0.077 0.034 7
-0.695 -0.102 0.088 10
-0.702 -0.097 0.061 8
-0.701 -0.041 0.006 9
-0.674 0.01 -0.063 8
-0.633 0.027 -0.175 8
-0.592 0.007 -0.311 9
-0.532 0.006 -0.28 8
-0.492 -0.02 -0.388 9
-0.427 -0.05 -0.448 8
-0.291 -0.116 -0.577 8
-0.061 -0.197 -0.817 9
0.151 -0.271 -1.106 7
0.29 -0.276 -1.275 10
0.261 -0.249 -1.147 8
0.404 -0.103 -1.042 8
0.593 -0.007 -0.949 9
0.741 -0.247 -1.085 8
0.807 -0.606 -1.159 9
0.842 -0.643 -1.099 8
0.758 -0.579 -0.989 8
0.76 -0.437 -0.89 9
0.745 -0.381 -1.158 8
0.737 -0.359 -1.256 9
0.725 -0.377 -1.373 6
0.646 -0.422 -1.423 10
0.487 -0.488 -1.381 9
0.438 -0.439 -1.243 8
0.258 -0.595 -1.208 8
0.079 -0.795 -1.304 9
-0.08 -0.968 -1.504 8
-0.133 -1.051 -1.659 9
-0.015 -1.0 -1.706 8
0.198 -0.849 -1.704 8
0.178 -0.764 -1.534 9
0.438 -0.648 -1.502 8
0.724 -0.735 -1.339 7
0.92 -0.978 -1.075 10
0.874 -1.067 -0.785 8
0.595 -1.042 -0.671 9
0.262 -1.035 -0.774 8
0.235 -0.931 -0.697 9
-0.039 -0.893 -0.891 8
-0.197 -0.834 -1.067 8
-0.193 -0.699 -1.15 9
-0.067 -0.517 -1.131 8
0.121 -0.394 -0.961 9
0.302 -0.337 -0.66 8
0.272 -0.303 -0.594 7
0.345 -0.335 -0.298 10
0.267 -0.396 -0.069 8
0.221 -0.273 0.114 9
0.385 0.152 0.297 8
0.577 0.675 0.318 8
0.52 0.608 0.286 9
0.628 1.015 0.231 8
0.786 1.33 0.48 8
0.906 1.636 1.09 9
0.786 1.852 2.006 8
0.474 1.765 2.886 9
0.426 1.588 2.597 6
0.184 1.287 3.04 10
0.141 1.149 3.028 9
0.222 1.419 2.71 8
0.415 2.027 2.271 9
0.707 2.813 2.006 8
1.06 3.32 2.219 8
1.591 3.082 2.957 9
1.432 2.774 2.661 8
1.88 2.307 3.691 9
1.936 2.156 4.817 8
1.792 2.224 5.705 8
1.603 2.328 5.946 7
1.484 2.533 5.564 10
1.362 2.721 4.74 9
1.226 2.449 4.266 8
1.141 2.407 3.543 8
1.233 2.18 3.19 9
1.405 1.825 3.133 8
1.544 1.387 3.202 9
1.573 1.022 3.153 8
1.416 0.88 2.894 8
1.277 0.792 2.604 9
1.069 0.929 1.938 8
0.927 1.185 0.822 7
0.816 1.284 -0.435 10
0.667 1.06 -1.373 8
0.39 0.65 -1.645 9
0.351 0.585 -1.481 8
0.016 0.276 -1.061 8
-0.35 0.073 -0.275 9
-0.749 -0.126 0.356 8
-0.991 -0.181 0.639 9
-1.087 -0.078 0.369 8
-1.14 0.141 -0.434 8
-1.026 0.127 -0.39 9
-1.003 0.502 -1.461 6
-0.782 0.772 -2.587 11
-0.352 0.879 -3.547 8
0.075 1.142 -4.244 8
0.642 1.421 -4.756 9
1.393 1.2 -5.253 8
1.254 1.08 -4.728 9
1.647 0.469 -4.934 8
1.367 -0.175 -4.413 8
0.665 -0.887 -3.502 9
-0.134 -1.625 -2.523 8
-0.699 -2.133 -1.666 8
-0.629 -1.92 -1.499 7
-0.72 -2.19 -1.156 10
-0.476 -2.201 -1.495 9
-0.213 -2.014 -2.294 8
-0.115 -1.808 -3.208 8
-0.344 -1.571 -3.903 9
-0.851 -1.292 -4.078 8
-0.766 -1.163 -3.726 9
-1.297 -1.046 -3.354 8
-1.62 -0.664 -2.833 8
-1.513 -0.44 -2.311 9
-0.926 -0.341 -1.876 8
-0.068 -0.348 -1.51 7
0.675 -0.401 -1.125 10
0.608 -0.361 -1.013 8
1.009 -0.463 -0.68 9
1.073 -0.663 -0.362 8
0.843 -0.991 -0.063 9
0.316 -1.257 0.077 8
-0.356 -1.248 -0.051 8
-0.842 -0.921 -0.291 9
-0.758 -0.828 -0.261 8
-0.828 -0.402 -0.379 8
-0.563 -0.066 -0.301 9
-0.118 0.232 0.078 7
0.371 0.45 0.7 10
0.795 0.498 1.223 8
0.987 0.376 1.478 8
0.888 0.338 1.33 9
0.537 0.155 1.349 8
-0.368 0.022 1.189 9
-1.495 0.011 0.883 8
-2.476 0.245 0.498 8
-2.932 0.714 0.24 9
-2.682 1.177 0.066 8
-2.413 1.059 0.059 9
-1.618 1.423 -0.141 6
-0.659 1.727 -0.305 10
-0.027 1.876 -0.408 9
-0.015 1.83 -0.436 8
-0.51 1.627 -0.316 9
-0.459 1.464 -0.134 8
-1.096 1.318 -0.121 8
-1.639 0.774 0.013 9
-2.046 0.593 0.101 8
-2.199 0.577 0.184 9
-1.916 0.576 0.361 8
-1.262 0.465 0.639 8
-1.136 0.418 0.575 7
-0.349 0.283 0.86 10
0.401 0.13 0.997 8
0.953 -0.08 0.881 9
1.191 -0.333 0.502 8
1.092 -0.628 -0.068 9
0.702 -0.94 -0.621 8
0.631 -0.846 -0.559 8
0.057 -1.093 -0.944 9
-0.567 -1.186 -1.118 8
-1.097 -1.148 -1.133 9
-1.384 -1.031 -0.913 8
-1.291 -0.909 -0.439 7
-0.8 -0.893 0.083 10
-0.72 -0.804 0.075 8
0.034 -0.878 0.54 9
0.626 -0.977 0.912 8
0.728 -1.142 1.201 8
0.434 -1.349 1.404 9
-0.076 -1.504 1.342 8
-0.643 -1.494 1.068 9
-0.578 -1.344 0.961 8
-1.003 -1.201 0.506 8
-1.132 -0.86 -0.212 9
-0.855 -0.443 -0.865 6
-0.157 -0.14 -1.183 11
0.715 0.074 -1.21 8
1.367 0.194 -1.109 8
1.23 0.174 -0.998 9
1.329 0.338 -1.015 8
0.783 0.672 -1.306 8
-0.117 1.069 -1.618 9
-0.947 1.395 -1.518 8
-1.312 1.612 -1.093 9
-1.181 1.451 -0.984 8
-0.917 1.51 -0.549 8
-0.173 1.41 -0.175 7
0.733 1.268 0.054 10
1.417 1.144 0.145 9
1.653 1.038 0.134 8
1.549 0.933 0.007 8
1.394 0.84 0.006 9
1.106 0.751 -0.14 8
0.797 0.803 -0.052 9
0.778 0.973 0.107 8
1.13 0.959 0.0 8
1.616 0.734 -0.18 9
1.96 0.611 -0.242 8
1.764 0.55 -0.217 7
1.929 0.593 -0.226 10
1.866 0.569 -0.351 8
1.452 0.612 -0.726 9
0.72 0.802 -1.166 8
-0.107 0.905 -1.553 8
-0.754 0.848 -1.907 9
-0.679 0.763 -1.716 8
-1.125 0.549 -1.922 9
-1.525 0.395 -1.974 8
-1.914 0.596 -2.041 8
-2.058 0.929 -2.072 9
-1.852 0.836 -1.865 7
-1.414 0.784 -1.476 10
-1.272 0.705 -1.328 8
-1.019 0.487 -0.489 8
-0.842 0.198 0.478 9
-0.59 -0.286 1.286 8
-0.379 -0.869 1.93 9
-0.479 -1.313 2.506 8
-0.431 -1.181 2.255 8
-0.72 -1.394 2.772 9
-0.885 -1.478 3.039 8
-0.79 -1.495 2.927 9
-0.463 -1.45 2.449 6
-0.009 -1.395 1.687 10
0.46 -1.308 0.759 9
0.414 -1.177 0.683 8
0.789 -1.094 -0.257 9
0.918 -1.087 -1.016 8
0.763 -1.099 -1.353 8
0.516 -1.036 -1.395 9
0.297 -0.904 -1.481 8
0.044 -0.741 -1.593 8
0.04 -0.667 -1.433 9
-0.158 -0.529 -1.335 8
-0.147 -0.493 -0.914 7
0.03 -0.485 -0.204 10
0.3 -0.402 0.672 8
0.637 -0.238 1.462 9
0.917 0.08 1.916 8
0.825 0.072 1.724 9
0.887 0.61 1.675 8
0.689 1.298 1.016 8
0.521 2.03 0.177 9
0.629 2.635 -0.583 8
1.05 2.951 -1.273 9
0.945 2.656 -1.628 8
1.535 2.39 -1.465 7
1.974 2.606 -1.279 10
2.054 2.255 -0.644 8
1.807 1.773 0.182 9
1.422 1.183 0.988 8
1.011 0.523 1.565 8
0.91 0.47 1.408 9
0.504 -0.132 1.677 8
0.129 -0.618 1.642 9
-0.192 -0.976 1.437 8
-0.475 -1.253 1.228 8
-0.766 -1.401 1.044 9
-0.689 -1.261 0.939 6
-0.963 -1.271 0.769 10
-1.117 -1.181 0.611 9
-1.142 -1.013 0.461 8
-1.079 -0.826 0.315 9
-1.022 -0.719 0.206 8
-1.083 -0.681 0.16 8
-1.208 -0.686 0.136 9
-1.087 -0.618 0.122 8
-1.192 -0.63 0.089 9
-1.243 -0.653 -0.03 8
-1.263 -0.654 -0.108 8
-1.283 -0.553 0.005 7
-1.173 -0.44 0.196 10
-0.83 -0.408 0.346 9
-0.747 -0.367 0.311 8
-0.308 -0.365 0.39 8
0.088 -0.387 0.395 9
0.368 -0.428 0.317 8
0.424 -0.375 0.206 9
0.308 -0.25 0.091 8
0.206 -0.056 -0.022 8
0.185 -0.05 -0.02 9
0.139 0.211 -0.112 8
0.192 0.383 -0.152 7
0.376 0.402 -0.134 10
0.627 0.297 -0.101 8
0.829 0.084 -0.084 9
0.746 0.075 -0.075 8
0.838 -0.162 -0.018 8
0.795 -0.366 0.189 9
0.617 -0.519 0.448 8
0.326 -0.576 0.535 9
0.0 -0.538 0.456 8
-0.234 -0.452 0.315 8
-0.21 -0.406 0.284 9
-0.273 -0.393 0.082 7
-0.201 -0.458 -0.162 10
-0.063 -0.485 -0.34 8
0.053 -0.441 -0.415 8
0.073 -0.279 -0.394 9
0.061 -0.046 -0.336 8
0.055 -0.041 -0.302 9
0.067 0.123 -0.307 8
0.043 0.203 -0.289 8
-0.033 0.234 -0.185 9
-0.135 0.235 -0.08 8
-0.209 0.209 -0.011 9
-0.188 0.188 -0.01 6
-0.219 0.152 0.019 10
-0.205 0.125 0.029 9
-0.127 0.119 0.039 8
0.014 0.131 0.044 8
0.167 0.152 0.058 9
0.259 0.164 0.108 8
0.233 0.143 0.213 9
0.21 0.129 0.192 8
0.243 0.081 0.303 8
0.21 0.012 0.317 9
0.169 -0.089 0.217 8
0.05 -0.182 0.091 7
-0.134 -0.202 0.055 10
-0.121 -0.181 0.049 8
-0.273 -0.164 0.093 9
-0.357 -0.14 0.119 8
-0.396 -0.105 0.121 9
-0.369 -0.067 0.086 8
-0.273 -0.03 -0.016 8
-0.132 -0.016 -0.132 9
-0.119 -0.015 -0.119 8
0.039 0.0 -0.179 8
0.148 0.037 -0.19 9
0.176 0.051 -0.159 7
0.101 0.054 -0.019 10
-0.03 0.066 0.221 8
-0.114 0.069 0.441 9
-0.102 0.062 0.397 8
-0.102 0.054 0.484 8
-0.027 0.04 0.415 9
0.036 0.037 0.249 8
0.076 0.05 0.081 8
0.158 0.06 -0.063 9
0.231 0.054 -0.181 8
0.208 0.049 -0.163 9
0.204 0.036 -0.186 6
0.167 0.032 -0.106 10
0.179 0.005 -0.039 9
0.219 -0.032 -0.011 8
0.181 -0.022 0.024 9
0.075 0.015 0.003 8
0.067 0.013 0.003 8
-0.009 0.045 -0.099 9
-0.012 0.068 -0.199 8
0.042 0.075 -0.233 9
0.119 0.075 -0.214 8
0.149 0.062 -0.169 8
0.134 0.056 -0.152 7
0.098 0.037 -0.043 10
0.054 0.019 0.123 9
0.048 0.003 0.258 8
0.051 -0.016 0.308 8
0.051 -0.035 0.306 9
0.029 -0.039 0.278 8
0.026 -0.035 0.25 8
0.013 -0.043 0.191 9
0.082 -0.052 0.136 8
0.236 -0.082 0.068 9
0.372 -0.126 0.005 8
0.356 -0.152 0.049 7
0.162 -0.137 0.207 10
0.146 -0.123 0.186 8
-0.106 -0.069 0.319 9
-0.269 -0.036 0.307 8
-0.329 -0.005 0.198 8
-0.33 0.048 0.036 9
-0.232 0.097 -0.171 8
-0.041 0.139 -0.364 9
-0.037 0.125 -0.328 8
0.093 0.147 -0.461 8
0.049 0.145 -0.474 9
-0.12 0.13 -0.364 6
-0.276 0.09 -0.182 11
-0.354 0.021 0.026 8
-0.318 0.019 0.023 8
-0.331 -0.083 0.021 9
-0.242 -0.234 0.307 8
-0.029 -0.372 0.23 9
0.165 -0.451 0.018 8
0.14 -0.441 -0.188 8
-0.088 -0.261 -0.278 9
-0.079 -0.235 -0.25 8
-0.335 0.046 -0.289 8
-0.42 0.358 -0.371 7
-0.261 0.637 -0.532 10
0.107 0.804 -0.584 9
0.519 0.815 -0.45 8
0.767 0.675 -0.237 8
0.69 0.608 -0.213 9
0.724 0.419 0.003 8
0.543 0.266 0.23 9
0.147 0.251 0.487 8
-0.326 0.326 0.666 8
-0.688 0.429 0.725 9
-0.811 0.503 0.711 8
-0.73 0.452 0.64 7
-0.577 0.412 0.542 10
-0.219 0.338 0.243 8
0.204 0.238 -0.276 9
0.515 0.115 -0.745 8
0.634 0.034 -0.985 9
0.539 0.004 -1.115 8
0.485 0.004 -1.003 8
0.192 0.041 -1.056 9
-0.126 0.129 -0.906 8
-0.46 0.094 -0.743 8
-0.863 0.078 -0.656 9
-0.777 0.07 -0.59 7
-1.072 0.374 -0.189 10
-1.144 0.336 -0.17 8
-0.977 0.334 -0.279 8
-0.618 0.267 -0.496 9
-0.214 0.227 -0.565 8
0.166 0.218 -0.473 9
0.499 0.198 -0.256 8
0.449 0.178 -0.23 8
0.633 0.159 0.092 9
0.659 0.183 0.392 8
0.612 0.189 0.574 9
0.517 0.14 0.768 6
0.312 0.088 0.985 10
0.06 0.044 1.112 9
0.054 0.039 1.001 8
-0.189 -0.094 0.973 9
-0.46 -0.265 0.82 8
-0.519 -0.253 0.858 8
-0.472 -0.279 0.94 9
-0.38 -0.493 0.697 8
-0.144 -0.687 0.663 9
-0.129 -0.618 0.597 8
-0.023 -0.643 0.91 8
-0.037 -0.582 0.93 7
-0.087 -0.619 0.6 10
-0.219 -0.712 0.256 8
-0.365 -0.731 0.041 9
-0.446 -0.607 -0.006 8
-0.401 -0.547 -0.006 9
-0.354 -0.362 0.009 8
-0.162 -0.248 -0.051 8
0.018 -0.283 -0.104 9
0.094 -0.306 0.003 8
0.019 -0.271 0.13 9
-0.23 -0.251 0.099 8
-0.207 -0.226 0.089 7
-0.473 -0.184 -0.054 10
-0.576 -0.181 -0.283 8
-0.486 -0.139 -0.485 9
-0.279 -0.111 -0.463 8
-0.024 -0.165 -0.156 8
-0.022 -0.149 -0.14 9
0.229 -0.186 0.164 8
0.41 -0.278 0.27 9
0.632 -0.33 0.35 8
0.865 -0.365 0.407 8
0.894 -0.533 0.359 9
0.804 -0.48 0.323 6
0.579 -0.652 0.274 11
0.162 -0.697 0.319 8
-0.221 -0.71 0.488 8
-0.311 -0.856 0.729 9
-0.17 -1.08 0.911 8
0.001 -1.243 0.99 8
0.226 -1.289 1.037 9
0.204 -1.16 0.933 8
0.442 -1.128 0.867 9
0.625 -1.072 0.61 8
0.677 -1.012 0.242 8
0.424 -0.936 -0.07 7
-0.072 -0.835 -0.138 10
-0.561 -0.726 -0.031 9
-0.505 -0.654 -0.028 8
-0.817 -0.564 0.113 8
-0.876 -0.499 0.303 9
-0.609 -0.416 0.53 8
-0.02 -0.263 0.752 9
0.594 -0.081 0.853 8
0.987 0.022 0.977 8
0.888 0.02 0.879 9
1.161 -0.216 1.003 8
1.284 -0.711 0.851 7
1.064 -1.011 0.628 10
0.485 -0.891 0.559 8
-0.123 -0.58 0.523 9
-0.426 -0.369 0.322 8
-0.384 -0.332 0.29 8
-0.406 -0.215 0.029 9
-0.259 -0.016 -0.125 8
-0.135 0.136 -0.155 9
0.002 -0.016 -0.136 8
0.189 -0.342 -0.059 8
0.17 -0.307 -0.053 9
0.114 -0.478 0.209 7
-0.143 -0.459 0.564 10
-0.419 -0.491 0.809 8
-0.634 -0.53 0.953 8
-0.757 -0.532 1.054 9
-0.901 -0.517 1.05 8
-0.811 -0.465 0.945 9
-0.987 -0.36 0.815 8
-1.138 -0.171 0.594 8
-1.294 0.0 0.333 9
-1.409 0.119 -0.001 8
-1.434 0.205 -0.367 9
-1.29 0.184 -0.33 6
-1.27 0.262 -0.555 10
-1.27 0.309 -0.493 9
-1.335 0.254 -0.142 8
-1.438 0.101 0.565 9
-1.387 -0.008 1.299 8
-1.076 -0.13 1.721 8
-0.779 -0.252 1.986 9
-0.701 -0.227 1.787 8
-0.704 -0.238 1.91 8
-0.968 -0.24 1.814 9
-1.419 -0.222 1.57 8
-1.891 -0.106 1.149 7
-2.085 0.066 0.429 10
-2.019 0.25 -0.398 8
-1.817 0.225 -0.358 9
-1.649 0.414 -1.067 8
-1.35 0.538 -1.497 9
-1.007 0.534 -1.579 8
# end
#Thu Feb 26 20:35:46 GMT+08:00 20150
