# Supplementary material for: Abnormal Gait Behavior Detection for Elderly Based on Enhanced Wigner-Ville Analysis and Cloud Incremental SVM Learning
Source: Hindawi journal article supplement (doi:10.1155/2016/5869238), 2016-01-01
Supplement: f1 [file 5869238.f1.zip › Supplementary Materials/Original Data/Backward fall Ending sitting/original__81.txt]

# Accelerometer Values
# filename:  original__81.txt
# Saving start time: Thu Feb 26 20:32:22 GMT+08:00 2015

# sensor resolution: 0.0095825195m/s^2
#Sensorvendor: KIONIX, name: KX023 Accelerometer, type: 1,version : 1, range 39.240005

# X value, Y value, Z value, time diff in ms
0.312 0.003 -0.23 9
0.265 0.002 -0.141 8
0.174 -0.002 -0.052 9
0.157 -0.001 -0.046 8
0.101 -0.002 -0.042 8
0.107 0.0 0.069 9
0.161 0.028 0.117 8
0.214 0.046 0.135 9
0.236 0.047 0.12 6
0.211 0.053 0.093 10
0.19 0.047 0.084 9
0.122 0.033 0.049 8
0.034 -0.001 0.013 9
-0.043 -0.039 0.018 8
-0.092 -0.072 0.063 8
-0.099 -0.087 0.1 9
-0.093 -0.088 0.114 8
-0.084 -0.079 0.103 8
-0.108 -0.068 0.126 9
-0.144 -0.056 0.108 8
-0.16 -0.046 0.015 7
-0.131 -0.024 -0.089 10
-0.06 0.016 -0.165 8
-0.018 0.075 -0.19 9
-0.016 0.067 -0.171 8
-0.046 0.115 -0.142 9
-0.098 0.097 -0.061 8
-0.119 0.034 0.1 8
-0.093 -0.027 0.232 9
-0.051 -0.075 0.231 8
-0.046 -0.067 0.208 9
-0.02 -0.086 0.187 8
-0.019 -0.063 0.1 7
-0.03 -0.01 0.026 10
-0.034 0.016 -0.111 8
-0.018 0.028 -0.185 9
-0.003 0.019 -0.233 8
-0.003 0.017 -0.209 8
0.015 -0.03 -0.273 9
0.061 -0.071 -0.292 8
0.107 -0.095 -0.229 9
0.096 -0.098 -0.047 8
0.026 -0.083 0.23 8
-0.044 -0.076 0.422 9
-0.039 -0.068 0.379 6
-0.082 -0.058 0.446 10
-0.092 -0.036 0.443 9
0.037 0.012 0.396 8
0.172 0.031 0.153 9
0.191 -0.036 -0.181 8
0.177 -0.059 -0.311 8
0.159 -0.053 -0.28 9
0.084 -0.007 -0.239 8
0.011 0.015 -0.122 9
-0.002 0.017 0.031 8
0.041 0.005 0.175 8
0.037 0.004 0.158 7
0.073 0.053 0.342 10
0.066 0.048 0.308 9
0.06 0.01 0.283 8
0.038 -0.008 0.179 8
0.024 -0.015 0.023 9
0.006 -0.013 -0.123 8
-0.014 0.01 -0.191 9
-0.013 0.009 -0.172 8
-0.022 0.033 -0.195 8
-0.037 0.065 -0.225 9
-0.035 0.108 -0.235 8
-0.031 0.139 -0.235 7
-0.046 0.134 -0.263 10
-0.052 0.073 -0.287 8
-0.047 0.066 -0.258 9
-0.049 -0.016 -0.243 8
-0.076 -0.06 -0.16 8
-0.115 -0.075 -0.042 9
-0.157 -0.076 0.142 8
-0.19 -0.04 0.355 9
-0.219 0.089 0.526 8
-0.197 0.08 0.474 8
-0.173 0.108 0.511 9
-0.084 0.021 0.337 7
0.024 -0.029 0.007 10
0.155 -0.078 -0.31 8
0.255 -0.104 -0.465 8
0.229 -0.119 -0.45 9
0.206 -0.107 -0.405 8
0.269 -0.1 -0.142 9
0.226 -0.092 0.234 8
0.162 -0.086 0.474 8
0.109 -0.074 0.565 9
0.081 -0.062 0.531 8
0.073 -0.055 0.478 9
0.093 -0.043 0.327 6
0.157 -0.035 0.033 10
0.226 -0.045 -0.269 9
0.247 -0.044 -0.375 8
0.205 -0.031 -0.318 8
0.126 -0.061 -0.267 9
0.114 -0.055 -0.24 8
0.026 -0.102 -0.238 9
-0.064 -0.122 -0.204 8
-0.092 -0.091 -0.056 8
-0.018 -0.032 0.114 9
0.087 0.006 0.2 8
0.078 0.005 0.18 7
0.185 0.023 0.273 10
0.315 0.024 0.402 8
0.461 0.019 0.498 9
0.53 0.011 0.464 8
0.488 0.007 0.218 9
0.37 0.01 -0.184 8
0.223 0.01 -0.656 8
0.201 0.009 -0.591 9
0.092 0.008 -0.982 8
0.042 0.032 -1.118 9
0.072 0.044 -1.01 8
0.16 0.024 -0.733 7
0.214 -0.063 -0.291 10
0.192 -0.057 -0.262 8
0.102 -0.192 0.273 9
-0.089 -0.262 0.764 8
-0.224 -0.322 1.005 8
-0.301 -0.431 0.882 9
-0.417 -0.425 0.494 8
-0.515 -0.275 0.115 8
-0.463 -0.248 0.103 9
-0.504 -0.129 -0.033 8
-0.543 -0.057 0.09 9
-0.504 0.006 0.4 6
-0.305 0.033 0.771 10
-0.031 -0.013 0.962 9
0.179 -0.157 0.836 8
0.161 -0.142 0.752 9
0.215 -0.301 0.576 8
0.115 -0.38 0.608 8
-0.167 -0.469 0.378 9
-0.48 -0.49 -0.201 8
-0.472 -0.326 -0.551 9
-0.132 -0.139 -0.453 8
-0.118 -0.125 -0.408 8
0.308 -0.022 -0.078 7
0.592 -0.003 0.067 10
0.63 -0.043 -0.096 9
0.575 -0.127 -0.166 8
0.612 -0.239 0.127 8
0.693 -0.335 0.477 9
0.623 -0.301 0.429 8
0.584 -0.347 0.674 8
0.448 -0.329 0.738 9
0.383 -0.275 0.448 8
0.423 -0.138 -0.218 9
0.502 0.034 -1.026 8
0.452 0.031 -0.923 7
0.439 0.032 -1.279 10
0.283 -0.073 -0.966 8
0.177 -0.162 -0.413 9
0.277 -0.234 0.088 8
0.516 -0.255 0.32 8
0.663 -0.252 0.047 9
0.596 -0.227 0.043 8
0.516 0.053 -0.395 9
0.217 0.405 -0.667 8
-0.019 0.439 -0.873 8
-0.057 0.063 -1.135 9
0.048 -0.574 -1.3 6
0.352 -0.985 -1.055 11
0.317 -0.887 -0.949 8
0.608 -1.018 -0.466 8
0.742 -0.971 -0.027 9
0.716 -0.629 0.258 8
0.619 -0.218 0.266 9
0.584 -0.041 -0.086 8
0.533 0.021 -0.554 8
0.48 0.019 -0.499 9
0.422 0.106 -0.759 8
0.464 0.198 -0.897 8
0.534 0.244 -1.23 7
0.486 0.381 -1.638 10
0.448 0.503 -1.898 9
0.597 0.411 -1.934 8
0.537 0.37 -1.741 8
0.786 0.225 -1.547 9
0.925 0.138 -1.16 8
0.768 0.101 -0.656 9
0.413 0.11 -0.321 8
0.019 0.107 -0.371 8
-0.375 0.158 -0.643 9
-0.337 0.142 -0.578 8
-0.53 0.199 -0.922 7
-0.374 0.142 -1.282 10
-0.028 0.034 -1.538 8
0.332 -0.143 -1.606 9
0.574 -0.435 -1.417 8
0.517 -0.392 -1.276 9
0.506 -0.674 -0.838 8
0.347 -0.852 -0.313 8
0.185 -0.966 0.137 9
0.0 -1.061 0.431 8
-0.18 -1.118 0.442 8
-0.254 -1.118 0.239 9
-0.229 -1.006 0.215 7
-0.211 -0.903 -0.05 10
-0.08 -0.696 -0.342 8
0.066 -0.499 -0.598 8
0.104 -0.342 -0.704 9
0.139 -0.22 -0.531 8
0.158 -0.12 -0.154 9
0.142 -0.108 -0.139 8
0.18 -0.085 0.352 8
0.421 -0.129 0.807 9
0.836 -0.14 1.013 8
1.143 -0.014 0.916 9
1.077 0.319 0.544 6
0.639 0.697 0.166 10
0.575 0.627 0.15 9
0.08 0.935 -0.042 8
-0.293 1.138 -0.038 9
-0.548 1.192 0.205 8
-0.728 1.107 0.639 8
-0.883 1.008 1.153 9
-0.922 0.97 1.468 8
-0.83 0.873 1.322 9
-0.773 0.897 1.272 8
-0.792 1.097 0.98 8
-0.943 1.489 0.667 7
-1.054 1.974 0.566 10
-0.932 2.418 0.741 8
-0.839 2.176 0.667 9
-0.559 2.488 0.962 8
-0.167 2.687 1.312 9
0.372 2.752 1.605 8
1.021 2.63 1.678 8
1.612 2.41 1.657 9
1.909 2.157 1.825 8
1.718 1.941 1.642 9
1.644 1.708 2.187 8
1.352 1.447 2.976 7
1.12 1.131 3.831 10
1.281 0.786 4.634 8
2.095 0.454 5.358 9
3.168 0.166 5.902 8
2.851 0.15 5.312 8
3.492 -0.012 5.495 9
3.35 -0.097 5.119 8
2.609 -0.225 4.17 9
1.823 -0.378 2.778 8
1.741 -0.641 1.309 8
2.41 -1.109 0.253 9
2.169 -0.998 0.227 6
2.714 -1.398 -0.257 11
2.767 -1.595 -0.278 8
2.614 -1.727 0.236 8
2.298 -1.808 1.117 9
1.615 -1.709 2.016 8
0.515 -1.393 2.462 8
0.464 -1.254 2.216 9
-0.672 -0.947 2.065 8
-1.39 -0.676 1.649 9
-1.599 -0.349 1.154 8
-1.251 0.028 0.593 8
-1.126 0.025 0.534 7
-0.357 0.422 -0.142 10
0.288 0.946 -1.04 9
0.813 1.584 -2.167 8
1.477 2.031 -3.362 8
1.988 2.049 -4.252 9
2.131 1.637 -4.511 8
1.904 0.857 -4.26 9
1.714 0.771 -3.834 8
0.988 -0.173 -3.471 8
-0.204 -0.986 -3.249 9
-1.374 -1.581 -3.381 8
-2.159 -1.969 -3.935 7
-2.235 -2.25 -4.741 10
-1.952 -2.444 -5.602 8
-1.757 -2.2 -5.042 9
-1.846 -2.13 -5.82 8
-2.117 -2.005 -6.164 8
-2.466 -1.988 -5.894 9
-2.918 -1.892 -5.017 8
-3.153 -1.686 -3.868 9
-2.87 -1.365 -2.764 8
-2.583 -1.229 -2.488 8
-1.744 -0.856 -1.648 9
-0.448 -0.533 -1.114 7
0.867 -0.383 -0.698 10
1.594 -0.423 -0.465 8
1.387 -0.556 -0.369 8
0.606 -0.684 -0.154 9
0.545 -0.615 -0.139 8
-0.206 -0.664 0.139 9
-0.653 -0.343 0.521 8
-0.071 0.279 1.074 8
1.668 0.751 1.595 9
3.685 0.955 1.953 8
3.316 0.859 1.758 9
4.622 0.777 1.582 6
4.417 0.448 1.93 10
2.85 0.133 1.567 9
0.732 0.038 0.511 8
-0.86 0.26 -1.116 9
-1.277 0.58 -2.941 8
-1.15 0.522 -2.647 8
-0.579 0.684 -4.463 9
0.004 1.004 -6.057 8
-0.64 1.71 -6.805 8
-2.731 2.558 -5.551 9
-5.269 3.274 -1.993 8
-4.742 2.947 -1.794 7
-6.405 3.382 2.434 10
-6.271 3.35 5.767 8
-4.932 3.133 7.9 9
-3.598 2.984 8.601 8
-2.862 2.969 7.558 9
-2.651 2.984 5.352 8
-2.542 2.654 2.863 8
-2.288 2.388 2.577 9
-2.07 1.886 0.458 8
-1.712 1.469 -0.792 9
-1.299 1.161 -1.341 8
-0.67 1.014 -1.713 7
0.192 0.931 -1.993 10
0.742 0.797 -2.01 8
0.668 0.717 -1.809 9
0.552 0.579 -1.482 8
-0.049 0.404 -0.93 8
-0.58 0.173 -0.346 9
-0.785 -0.04 0.098 8
-0.727 -0.153 0.103 9
-0.421 -0.176 -0.312 8
-0.378 -0.159 -0.281 8
-0.092 -0.107 -0.923 9
-0.311 0.043 -1.629 6
-0.981 0.026 -2.279 10
-1.719 -0.314 -2.493 9
-2.538 -0.67 -2.091 8
-2.284 -0.603 -1.882 9
-2.567 -0.977 -1.078 8
-1.818 -1.127 0.006 8
-0.559 -1.027 1.137 9
0.613 -0.936 1.778 8
1.254 -0.801 1.796 9
1.415 -0.713 1.53 8
1.274 -0.642 1.377 8
1.121 -0.7 0.967 7
0.668 -0.794 0.45 10
0.157 -0.815 -0.147 9
-0.119 -0.713 -0.646 8
-0.01 -0.523 -0.863 8
0.36 -0.419 -0.678 9
0.324 -0.377 -0.61 8
0.993 -0.677 -0.163 9
1.57 -1.245 0.462 8
1.292 -1.065 0.628 8
0.506 -0.585 -0.081 9
-0.205 -0.719 -1.009 8
-0.185 -0.647 -0.908 7
-0.798 -1.066 -1.379 10
-1.571 -1.096 0.806 8
-2.233 -0.612 3.787 9
-2.079 -0.693 3.806 8
-1.067 -1.226 2.666 8
0.294 -1.595 2.495 9
1.464 -1.765 2.966 8
1.318 -1.588 2.67 9
1.97 -1.488 3.057 8
2.033 -1.39 3.172 8
1.617 -1.252 3.043 9
0.91 -0.986 2.667 7
0.233 -0.81 2.116 10
0.21 -0.729 1.904 8
-0.26 -0.603 1.396 8
-0.495 -0.432 0.885 9
-0.495 -0.298 0.323 8
-0.286 -0.194 -0.177 9
-0.03 -0.144 -0.434 8
0.049 -0.108 -0.38 8
0.044 -0.097 -0.342 9
-0.078 -0.062 -0.184 8
-0.326 -0.054 -0.035 9
-0.552 -0.069 0.077 6
-0.668 -0.09 0.14 10
-0.672 -0.103 0.141 9
-0.508 -0.117 0.058 8
-0.457 -0.106 0.052 9
-0.131 -0.132 0.001 8
0.177 -0.174 0.026 8
0.331 -0.195 0.064 9
0.338 -0.178 0.092 8
0.204 -0.154 0.105 8
-0.027 -0.119 0.078 9
-0.025 -0.107 0.07 8
-0.246 -0.073 -0.049 7
-0.403 -0.037 -0.256 10
-0.46 -0.008 -0.474 8
-0.399 0.008 -0.635 9
-0.297 0.016 -0.676 8
-0.267 0.014 -0.578 9
-0.2 0.015 -0.52 8
-0.138 0.008 -0.361 8
-0.096 -0.011 -0.224 9
-0.138 -0.035 -0.1 8
-0.229 -0.042 0.06 9
-0.277 -0.043 0.155 8
-0.249 -0.039 0.139 7
-0.222 -0.068 0.16 10
-0.198 -0.059 0.225 8
-0.191 -0.008 0.233 9
-0.167 0.016 0.162 8
-0.157 0.028 0.011 8
-0.18 0.033 -0.204 9
-0.162 0.029 -0.183 8
-0.212 0.034 -0.3 8
-0.239 0.036 -0.306 9
-0.231 0.03 -0.225 8
-0.172 0.023 -0.011 9
-0.099 0.012 0.207 6
-0.007 -0.008 0.297 10
-0.006 -0.007 0.268 9
0.043 -0.02 0.355 8
0.009 -0.012 0.462 9
0.003 -0.004 0.425 8
0.072 0.001 0.278 8
0.2 0.014 0.061 9
0.37 -0.021 -0.165 8
0.333 -0.019 -0.149 9
0.326 -0.033 -0.232 8
0.089 0.011 -0.14 8
-0.123 0.02 0.044 7
-0.277 -0.001 0.167 10
-0.399 -0.018 0.217 9
-0.398 -0.013 0.239 8
-0.358 -0.011 0.215 8
-0.216 0.005 0.172 9
0.043 -0.029 0.009 8
0.194 0.018 -0.153 8
0.133 0.171 -0.158 9
0.083 0.166 -0.072 8
0.075 0.149 -0.065 9
0.018 0.056 -0.034 8
-0.053 0.025 -0.061 7
-0.083 0.049 -0.162 10
-0.078 0.079 -0.38 8
-0.036 0.091 -0.582 9
-0.108 0.261 -0.632 8
-0.097 0.235 -0.569 8
-0.166 0.423 -0.503 9
-0.052 0.336 -0.387 8
0.03 0.219 -0.262 9
0.013 0.145 -0.132 8
0.005 0.036 0.026 8
-0.004 -0.022 0.099 9
-0.004 -0.02 0.089 6
-0.034 -0.035 -0.008 11
-0.059 -0.001 -0.157 8
-0.068 0.066 -0.245 8
-0.047 0.044 -0.284 9
-0.088 0.041 -0.289 8
-0.16 0.161 -0.237 9
-0.144 0.144 -0.213 8
-0.088 0.098 -0.165 8
0.021 -0.007 -0.126 9
0.113 -0.032 -0.055 8
0.128 -0.028 -0.011 8
0.115 -0.025 -0.01 7
-0.052 0.123 -0.113 10
-0.047 0.111 -0.102 9
-0.185 0.155 -0.137 8
-0.314 0.158 -0.178 8
-0.342 0.071 -0.163 9
-0.351 0.038 -0.119 8
-0.344 0.073 -0.06 9
-0.309 0.066 -0.054 8
-0.182 -0.013 0.014 8
-0.02 -0.076 0.054 9
0.067 -0.048 0.095 8
0.052 0.026 0.106 7
0.019 0.089 0.024 10
-0.107 0.183 -0.095 8
-0.096 0.165 -0.085 9
-0.362 0.24 -0.063 8
-0.566 0.197 0.051 9
-0.63 0.109 0.165 8
-0.603 -0.003 0.247 8
-0.451 -0.085 0.235 9
-0.14 -0.067 0.15 8
-0.126 -0.06 0.135 8
0.201 0.013 -0.004 9
0.365 0.084 -0.148 7
0.33 0.137 -0.222 10
0.15 0.155 -0.223 8
-0.025 0.153 -0.157 8
-0.131 0.113 0.003 9
-0.118 0.101 0.003 8
-0.251 0.042 0.144 9
-0.368 0.007 0.192 8
-0.335 0.0 0.187 8
-0.166 0.027 0.113 9
0.039 0.095 -0.017 8
0.253 0.141 -0.099 9
0.228 0.127 -0.089 6
0.295 0.215 -0.233 10
0.132 0.338 -0.443 9
-0.127 0.359 -0.464 8
-0.345 0.302 -0.393 9
-0.44 0.225 -0.311 8
-0.396 0.202 -0.28 8
-0.415 0.089 -0.166 9
-0.375 -0.055 -0.076 8
-0.246 -0.133 -0.024 9
-0.036 -0.131 0.01 8
0.201 -0.063 0.005 8
0.181 -0.057 0.005 7
0.35 0.037 -0.034 10
0.31 0.123 -0.08 8
0.059 0.193 -0.137 9
-0.206 0.225 -0.161 8
-0.389 0.211 -0.132 9
-0.53 0.166 -0.094 8
-0.524 0.088 -0.076 8
-0.472 0.079 -0.068 9
-0.328 -0.02 -0.071 8
-0.076 -0.083 -0.074 9
0.244 -0.071 -0.047 8
0.42 -0.054 0.033 7
0.348 -0.061 0.165 10
0.105 -0.075 0.337 8
0.095 -0.068 0.303 9
-0.145 -0.081 0.468 8
-0.274 -0.083 0.498 8
-0.297 -0.077 0.363 9
-0.247 -0.061 0.138 8
-0.08 -0.012 -0.069 9
0.162 0.054 -0.208 8
0.146 0.048 -0.187 8
0.276 0.078 -0.25 9
0.201 0.064 -0.225 6
0.008 0.034 -0.127 11
-0.155 0.035 -0.003 8
-0.236 0.043 0.056 8
-0.26 0.044 0.011 9
-0.234 0.039 0.01 8
-0.224 0.042 -0.061 8
-0.176 0.012 -0.094 9
-0.012 -0.035 -0.077 8
0.183 -0.061 -0.036 9
0.257 -0.061 0.009 8
0.231 -0.054 0.008 8
0.184 -0.035 0.046 7
0.048 -0.01 0.029 10
-0.099 0.026 -0.025 9
-0.204 0.067 -0.067 8
-0.268 0.094 -0.099 8
-0.269 0.091 -0.133 9
-0.242 0.082 -0.12 8
-0.197 0.075 -0.142 9
-0.118 0.061 -0.135 8
-0.005 0.024 -0.106 8
0.053 -0.009 -0.067 9
0.032 -0.02 -0.029 8
0.029 -0.018 -0.026 7
0.037 -0.025 -0.003 10
0.063 -0.031 0.013 8
0.041 -0.017 0.03 9
-0.016 -0.001 0.046 8
-0.067 0.015 0.061 8
-0.096 0.028 0.084 9
-0.096 0.016 0.137 8
-0.087 0.014 0.124 9
-0.063 -0.026 0.181 8
-0.025 -0.058 0.185 8
0.04 -0.061 0.108 9
0.143 -0.044 -0.013 7
0.191 0.003 -0.122 10
0.105 0.065 -0.252 8
0.094 0.058 -0.226 8
0.002 0.049 -0.17 9
-0.192 -0.01 0.006 8
-0.515 0.009 0.004 9
-0.576 -0.018 -0.087 8
-0.349 -0.087 -0.242 8
-0.314 -0.079 -0.218 9
0.005 -0.055 -0.385 8
0.282 0.012 -0.414 9
0.396 0.064 -0.246 6
0.349 0.067 0.036 10
0.232 0.056 0.289 9
0.113 0.04 0.415 8
0.102 0.036 0.373 9
-0.002 0.005 0.346 8
-0.156 0.01 0.214 8
-0.376 0.024 0.047 9
-0.542 0.046 -0.122 8
-0.585 0.093 -0.299 8
-0.511 0.083 -0.478 9
-0.46 0.075 -0.43 8
# end
#Thu Feb 26 20:32:27 GMT+08:00 20152
