# Supplementary material for: Abnormal Gait Behavior Detection for Elderly Based on Enhanced Wigner-Ville Analysis and Cloud Incremental SVM Learning
Source: Hindawi journal article supplement (doi:10.1155/2016/5869238), 2016-01-01
Supplement: f1 [file 5869238.f1.zip › Supplementary Materials/Original Data/Backward fall Ending sitting/original__82.txt]

# Accelerometer Values
# filename:  original__82.txt
# Saving start time: Thu Feb 26 20:32:29 GMT+08:00 2015

# sensor resolution: 0.0095825195m/s^2
#Sensorvendor: KIONIX, name: KX023 Accelerometer, type: 1,version : 1, range 39.240005

# X value, Y value, Z value, time diff in ms
0.098 0.044 -0.047 8
-0.006 -0.001 -0.179 8
-0.087 -0.077 -0.256 9
-0.14 -0.147 -0.255 8
-0.155 -0.195 -0.193 9
-0.139 -0.175 -0.174 8
-0.114 -0.209 -0.049 7
0.011 -0.222 0.101 10
0.202 -0.207 0.184 8
0.326 -0.173 0.182 8
0.345 -0.114 0.13 9
0.289 -0.04 0.038 8
0.26 -0.036 0.034 9
0.172 0.002 -0.043 8
0.095 -0.006 -0.036 8
0.109 -0.034 0.048 9
0.18 -0.074 0.151 8
0.241 -0.103 0.211 9
0.217 -0.093 0.19 6
0.266 -0.083 0.198 10
0.313 -0.019 0.16 9
0.367 0.08 0.079 8
0.41 0.178 -0.023 9
0.405 0.254 -0.079 8
0.349 0.278 -0.08 8
0.275 0.225 -0.041 9
0.248 0.203 -0.037 8
0.187 0.107 0.043 9
0.155 0.023 0.138 8
0.127 -0.029 0.172 8
0.093 -0.05 0.126 7
0.064 -0.016 0.081 10
0.058 -0.014 0.068 9
0.047 0.043 0.061 8
0.057 0.067 0.059 8
0.063 0.062 0.07 9
0.035 0.056 0.11 8
0.0 0.044 0.155 8
0.032 0.027 0.198 9
0.028 0.024 0.179 8
0.115 -0.001 0.171 9
0.181 -0.034 0.071 8
0.219 -0.037 -0.029 7
0.227 0.018 -0.058 10
0.233 0.069 -0.065 8
0.244 0.06 -0.079 9
0.22 0.054 -0.071 8
0.194 0.022 -0.059 8
0.116 -0.001 -0.015 9
0.027 -0.016 0.007 8
-0.02 -0.028 -0.01 9
-0.014 -0.05 -0.051 8
0.01 -0.056 -0.097 8
0.009 -0.05 -0.088 9
0.022 -0.027 -0.124 6
0.024 0.007 -0.118 11
0.025 0.039 -0.092 8
0.021 0.052 -0.08 8
-0.001 0.047 -0.066 9
-0.05 0.023 -0.048 8
-0.045 0.02 -0.043 9
-0.113 -0.008 -0.042 8
-0.162 -0.038 -0.08 8
-0.143 -0.057 -0.151 9
-0.064 -0.05 -0.214 8
0.037 -0.044 -0.246 8
0.034 -0.04 -0.221 7
0.127 -0.042 -0.234 10
0.195 -0.005 -0.208 9
0.235 0.044 -0.13 8
0.237 0.047 -0.002 8
0.207 0.009 0.136 9
0.139 -0.04 0.293 8
0.125 -0.036 0.264 9
0.011 -0.063 0.44 8
-0.098 -0.076 0.54 8
-0.128 -0.104 0.526 9
-0.059 -0.136 0.425 8
0.043 -0.149 0.259 7
0.136 -0.13 0.097 10
0.122 -0.117 0.087 8
0.172 -0.082 -0.011 9
0.133 -0.042 -0.065 8
0.051 -0.011 -0.091 8
-0.023 -0.016 -0.089 9
-0.078 -0.042 -0.062 8
-0.103 -0.067 -0.013 9
-0.093 -0.06 -0.011 8
-0.092 -0.076 0.015 8
-0.062 -0.05 -0.028 9
0.009 0.0 -0.097 7
0.104 0.04 -0.152 10
0.189 0.068 -0.175 8
0.232 0.075 -0.156 8
0.209 0.067 -0.14 9
0.187 0.053 -0.098 8
0.106 0.024 -0.067 9
0.012 0.007 -0.071 8
-0.061 0.03 -0.097 8
-0.093 0.077 -0.137 9
-0.084 0.099 -0.177 8
-0.075 0.089 -0.159 9
-0.018 0.099 -0.15 6
-0.012 0.12 -0.092 10
-0.042 0.136 -0.009 9
-0.071 0.118 0.085 8
-0.08 0.086 0.135 9
-0.072 0.077 0.122 8
-0.072 0.061 0.114 8
-0.069 0.051 0.063 9
-0.063 0.053 -0.034 8
-0.061 0.059 -0.114 9
-0.076 0.074 -0.143 8
-0.114 0.081 -0.135 8
-0.103 0.073 -0.122 7
-0.158 0.06 -0.104 10
-0.227 0.047 -0.084 9
-0.298 0.006 -0.067 8
-0.358 -0.074 -0.055 8
-0.427 -0.16 -0.018 9
-0.491 -0.22 0.019 8
-0.441 -0.198 0.017 8
-0.446 -0.221 0.07 9
-0.402 -0.226 0.148 8
-0.368 -0.214 0.2 9
-0.35 -0.194 0.163 8
-0.347 -0.164 0.048 7
-0.354 -0.135 -0.092 10
-0.319 -0.121 -0.082 8
-0.341 -0.105 -0.208 9
-0.365 -0.098 -0.287 8
-0.373 -0.094 -0.313 8
-0.357 -0.094 -0.317 9
-0.29 -0.09 -0.317 8
-0.136 -0.073 -0.316 9
-0.122 -0.065 -0.285 8
0.073 -0.024 -0.309 8
0.233 0.018 -0.317 9
0.302 0.027 -0.269 6
0.294 0.0 -0.177 10
0.277 -0.035 -0.068 9
0.249 -0.031 0.053 8
0.267 -0.056 0.048 9
0.293 -0.069 0.174 8
0.328 -0.088 0.238 8
0.365 -0.116 0.187 9
0.388 -0.146 0.085 8
0.384 -0.181 -0.003 9
0.346 -0.163 -0.003 8
0.298 -0.177 -0.067 8
0.205 -0.157 -0.099 7
0.122 -0.114 -0.104 10
0.148 -0.055 -0.046 9
0.33 0.031 0.124 8
0.39 -0.081 0.022 8
0.351 -0.073 0.02 9
0.258 -0.215 -0.292 8
0.203 -0.131 -0.394 9
0.128 -0.109 -0.56 8
0.014 -0.105 -0.827 8
-0.118 -0.027 -1.076 9
-0.217 -0.055 -1.353 8
-0.196 -0.049 -1.218 7
-0.189 -0.176 -1.364 10
-0.069 -0.27 -1.196 8
0.082 -0.389 -0.866 9
0.224 -0.532 -0.611 8
0.381 -0.623 -0.565 8
0.53 -0.696 -0.764 9
0.477 -0.627 -0.687 8
0.635 -0.771 -0.932 9
0.678 -0.962 -1.073 8
0.492 -1.105 -1.168 8
0.193 -1.174 -1.305 9
0.173 -1.057 -1.175 7
-0.401 -1.163 -1.749 10
-0.361 -1.047 -1.574 8
-0.576 -1.006 -1.894 8
-0.719 -1.011 -2.238 9
-0.617 -0.971 -2.354 8
-0.21 -0.849 -2.162 9
0.262 -0.76 -1.937 8
0.236 -0.684 -1.743 8
0.536 -0.608 -1.516 9
0.507 -0.492 -1.09 8
0.16 -0.386 -0.646 9
-0.275 -0.329 -0.304 6
-0.584 -0.321 -0.044 10
-0.752 -0.335 0.052 9
-0.677 -0.301 0.047 8
-0.748 -0.294 0.023 9
-0.732 -0.264 -0.075 8
-0.601 -0.249 -0.168 8
-0.342 -0.228 -0.108 9
-0.046 -0.183 0.078 8
0.15 -0.108 0.229 8
0.135 -0.097 0.206 9
0.152 0.027 0.445 8
0.038 0.154 0.611 7
-0.099 0.312 0.645 10
-0.084 0.618 0.929 8
0.14 0.949 1.445 9
0.487 1.212 1.876 8
0.438 1.091 1.689 9
0.855 1.35 1.989 8
1.128 1.533 2.298 8
1.141 1.953 2.544 9
1.057 2.647 2.644 8
1.143 3.135 2.601 9
1.439 3.293 2.569 8
1.295 2.964 2.312 7
1.534 3.107 2.449 10
1.537 3.317 2.467 8
1.35 3.39 2.366 9
1.042 3.273 2.5 8
0.637 2.959 3.157 8
0.574 2.663 2.841 9
0.199 2.216 3.94 8
0.065 1.738 4.868 8
0.352 1.367 5.22 9
1.045 1.14 4.906 8
1.725 1.137 4.039 9
1.552 1.023 3.635 6
1.805 1.224 2.495 10
1.465 1.451 1.203 9
0.998 1.731 0.225 8
0.545 1.823 -0.373 9
0.177 1.569 -0.675 8
0.384 1.21 -0.26 8
0.944 0.896 0.376 9
0.85 0.806 0.338 8
1.414 0.394 0.852 9
1.704 -0.115 1.385 8
1.539 -0.31 1.764 8
1.005 -0.408 1.761 7
0.241 -0.747 1.472 10
-0.536 -1.116 1.256 9
-0.482 -1.004 1.13 8
-1.091 -1.237 0.984 8
-1.422 -1.227 0.926 9
-1.521 -0.639 1.12 8
-0.999 0.439 1.345 9
0.422 1.169 0.743 8
2.094 1.3 -0.598 8
1.884 1.17 -0.538 9
3.119 0.866 -1.495 8
3.301 0.061 -1.473 7
2.193 -0.709 -0.713 10
0.379 -1.471 -0.36 8
-1.256 -2.504 -1.136 9
-1.13 -2.253 -1.022 8
-2.39 -2.747 -2.463 8
-3.415 -2.436 -4.273 9
-3.798 -1.837 -6.104 8
-3.143 -1.101 -7.39 9
-2.314 -0.255 -7.948 8
-1.612 0.63 -7.706 8
-1.451 0.567 -6.935 9
-0.61 1.015 -6.111 6
-0.008 0.818 -4.759 11
0.245 0.61 -3.144 8
0.159 0.497 -1.788 8
-0.134 0.317 -0.788 9
-0.51 0.131 -0.026 8
-0.459 0.118 -0.023 9
-0.844 -0.043 0.554 8
-0.969 -0.12 0.98 8
-0.55 -0.18 1.187 9
0.305 -0.287 1.241 8
1.291 -0.387 1.368 9
1.162 -0.348 1.231 6
1.926 -0.499 1.494 10
2.281 -0.743 1.588 9
2.349 -1.001 1.384 8
2.183 -1.35 1.006 8
1.77 -1.733 0.412 9
1.001 -1.963 -0.51 8
0.901 -2.109 -1.561 9
0.811 -1.898 -1.405 8
-1.254 -1.985 -2.247 8
-2.115 -1.828 -2.704 9
-2.502 -1.332 -2.711 8
-2.263 -0.622 -2.59 7
-1.406 0.102 -2.563 10
-1.265 0.092 -2.307 8
0.066 0.863 -2.246 9
1.471 1.345 -2.124 8
2.593 1.181 -1.929 9
3.088 0.19 -1.551 8
2.286 -1.13 -0.661 8
0.07 -1.6 1.188 9
0.063 -1.44 1.069 8
-2.948 -0.895 3.59 9
-5.815 0.283 6.163 8
-7.485 1.458 8.144 7
-7.169 1.748 9.103 10
-5.045 1.434 9.007 8
-2.428 1.21 7.285 8
-2.185 1.089 6.557 9
-0.119 1.065 3.666 8
1.175 1.245 0.395 9
1.868 1.454 -2.536 8
2.184 1.544 -4.42 8
1.94 1.628 -5.229 9
1.146 1.666 -5.111 8
1.031 1.499 -4.6 9
0.288 1.183 -3.64 6
-0.058 0.619 -2.11 10
-0.014 0.096 -0.754 9
0.35 -0.403 -0.082 8
0.83 -0.762 -0.16 9
0.747 -0.686 -0.144 8
1.137 -0.858 -0.65 8
1.25 -0.847 -1.114 9
1.103 -0.737 -1.303 8
0.73 -0.733 -1.239 9
0.288 -0.746 -0.889 8
-0.006 -0.732 -0.313 8
-0.005 -0.658 -0.282 7
-0.164 -0.671 0.215 10
-0.286 -0.674 0.379 8
-0.174 -0.581 0.349 9
0.281 -0.298 0.209 8
0.677 0.006 -0.092 9
0.666 0.243 -0.395 8
0.599 0.218 -0.356 8
0.238 0.388 -0.436 9
-0.253 0.401 -0.212 8
-0.667 0.225 0.0 9
-0.851 -0.044 0.028 8
-0.903 -0.216 -0.036 7
-0.896 -0.159 -0.06 10
-0.806 -0.143 -0.054 8
-0.598 0.063 -0.008 9
-0.223 0.223 -0.011 8
0.132 0.322 -0.09 8
0.358 0.389 -0.171 9
0.253 0.267 -0.196 8
-0.174 0.067 -0.188 9
-0.156 0.06 -0.169 8
-0.676 -0.053 -0.134 8
-1.088 -0.187 -0.08 9
-1.159 -0.327 -0.054 6
-0.834 -0.386 -0.036 11
-0.297 -0.433 0.131 8
-0.267 -0.39 0.118 8
0.2 -0.456 0.106 9
0.44 -0.546 0.932 8
0.431 -0.662 1.427 8
0.267 -0.742 1.875 9
0.103 -0.718 1.987 8
0.1 -0.718 1.79 9
0.09 -0.646 1.611 8
0.21 -0.632 1.196 8
0.329 -0.454 0.64 7
0.4 -0.242 0.291 10
0.275 -0.067 0.181 9
0.0 -0.012 0.122 8
-0.256 -0.056 0.157 8
-0.231 -0.05 0.141 9
-0.398 -0.07 0.277 8
-0.454 -0.045 0.291 9
-0.397 -0.001 0.148 8
-0.221 0.037 -0.01 8
-0.001 0.054 -0.115 9
0.125 0.054 -0.093 8
0.113 0.049 -0.083 7
0.154 0.026 0.112 10
0.16 -0.065 0.363 8
0.118 -0.119 0.526 9
0.058 -0.072 0.472 8
0.013 -0.032 0.256 9
-0.06 0.001 0.031 8
-0.054 0.001 0.028 8
-0.204 0.045 -0.196 9
-0.368 0.074 -0.422 8
-0.448 0.08 -0.564 8
-0.393 0.065 -0.563 9
-0.353 0.058 -0.507 7
-0.152 0.035 -0.423 10
0.157 0.032 -0.381 8
0.38 0.007 -0.258 8
0.391 0.006 -0.157 9
0.238 0.012 -0.071 8
0.015 0.014 -0.016 9
-0.182 0.021 -0.03 8
-0.164 0.019 -0.027 8
-0.293 0.041 -0.105 9
-0.323 0.045 -0.222 8
-0.275 0.029 -0.287 9
-0.178 0.017 -0.298 6
-0.059 0.014 -0.31 10
-0.014 0.017 -0.243 9
-0.012 0.015 -0.219 8
-0.04 0.027 -0.108 9
-0.065 0.039 -0.026 8
-0.072 0.069 0.033 8
-0.026 0.102 0.059 9
0.087 0.1 0.071 8
0.251 0.063 0.061 9
0.226 0.057 0.055 8
0.361 0.01 0.026 8
0.338 -0.019 0.003 7
0.194 -0.047 -0.02 10
0.022 -0.075 0.009 8
-0.142 -0.081 0.065 9
-0.244 -0.073 0.098 8
-0.22 -0.066 0.088 9
-0.265 -0.067 0.118 8
-0.248 -0.099 0.151 8
-0.145 -0.152 0.154 9
0.022 -0.186 0.108 8
0.187 -0.181 0.044 9
0.168 -0.132 -0.033 8
0.151 -0.118 -0.029 7
0.201 -0.055 -0.115 10
0.06 -0.01 -0.126 8
-0.097 0.018 -0.069 9
-0.2 0.037 -0.002 8
-0.241 0.031 0.076 8
-0.216 0.028 0.068 9
-0.2 -0.004 0.135 8
-0.164 -0.025 0.157 9
-0.076 -0.037 0.113 8
0.02 -0.028 0.107 8
0.026 0.023 0.114 9
0.024 0.021 0.102 6
-0.008 0.061 0.021 10
-0.059 0.077 -0.022 9
-0.122 0.091 -0.001 8
-0.145 0.092 0.018 9
-0.072 0.078 0.021 8
0.135 0.064 -0.001 8
0.34 0.051 -0.028 9
0.306 0.046 -0.025 8
0.335 0.026 0.031 9
0.208 -0.006 0.182 8
0.025 -0.059 0.315 8
-0.137 -0.08 0.366 7
-0.227 -0.077 0.34 10
-0.238 -0.072 0.255 9
-0.214 -0.065 0.229 8
-0.149 -0.024 0.072 8
-0.012 0.027 -0.158 9
0.141 0.075 -0.365 8
0.247 0.134 -0.499 9
0.249 0.203 -0.565 8
0.207 0.212 -0.555 8
0.186 0.19 -0.499 9
0.105 0.137 -0.354 8
-0.039 0.068 -0.121 7
-0.164 -0.02 0.061 10
-0.246 -0.099 0.22 8
-0.284 -0.178 0.35 9
-0.256 -0.16 0.315 8
-0.21 -0.257 0.346 8
-0.036 -0.267 0.266 9
0.231 -0.177 0.14 8
0.447 -0.077 0.0 9
0.498 -0.007 -0.103 8
0.38 0.025 -0.131 8
0.342 0.023 -0.118 9
0.142 0.016 -0.082 7
-0.074 -0.011 0.004 10
-0.248 -0.04 0.089 8
-0.338 -0.057 0.135 8
-0.33 -0.072 0.129 9
-0.232 -0.09 0.079 8
-0.209 -0.081 0.071 9
-0.065 -0.059 0.003 8
0.062 -0.006 -0.06 8
0.125 0.036 -0.103 9
0.11 0.06 -0.111 8
0.023 0.065 -0.087 9
0.02 0.059 -0.078 6
-0.081 0.053 -0.044 10
-0.148 0.034 0.003 9
-0.178 -0.017 0.051 8
-0.169 -0.102 0.087 8
-0.096 -0.148 0.122 9
0.045 -0.12 0.093 8
0.157 -0.037 -0.005 9
0.141 -0.033 -0.004 8
0.134 0.049 -0.12 8
0.031 0.087 -0.184 9
-0.095 0.092 -0.176 8
-0.183 0.083 -0.104 7
-0.208 0.046 -0.003 10
-0.187 0.041 -0.003 8
-0.165 -0.03 0.058 9
-0.165 -0.011 0.075 8
-0.099 0.019 0.083 9
0.027 -0.004 0.066 8
0.058 0.017 -0.006 8
0.003 0.039 -0.087 9
0.003 0.035 -0.079 8
-0.076 0.054 -0.179 9
-0.136 0.071 -0.227 8
-0.173 0.073 -0.188 7
-0.191 0.067 -0.172 10
-0.171 0.063 -0.111 8
-0.134 0.058 0.005 9
-0.121 0.052 0.004 8
-0.128 0.048 0.079 8
-0.183 0.033 0.153 9
-0.275 0.017 0.24 8
-0.397 0.02 0.319 9
-0.463 0.0 0.44 8
-0.513 -0.024 0.554 8
-0.462 -0.021 0.498 9
-0.476 -0.016 0.614 6
-0.499 -0.008 0.583 10
-0.505 -0.008 0.328 9
-0.342 -0.018 0.06 8
-0.156 -0.031 -0.124 9
-0.012 -0.049 -0.212 8
-0.011 -0.044 -0.191 8
0.082 -0.055 -0.245 9
0.081 -0.073 -0.227 8
-0.081 -0.093 -0.166 9
-0.333 -0.084 -0.16 8
-0.495 -0.099 -0.186 8
-0.446 -0.089 -0.168 7
-0.497 -0.124 -0.158 10
-0.556 -0.088 -0.105 9
-0.565 -0.068 -0.103 8
-0.421 -0.099 -0.153 8
-0.073 -0.066 -0.245 9
0.344 -0.028 -0.34 8
0.309 -0.025 -0.306 9
0.513 0.006 -0.257 8
0.491 0.064 -0.082 8
0.337 0.103 0.11 9
0.144 0.114 0.275 8
-0.059 0.101 0.357 7
-0.261 0.086 0.33 10
-0.235 0.078 0.297 8
-0.36 0.076 0.164 9
-0.343 0.076 -0.056 8
-0.149 0.07 -0.29 8
0.13 0.061 -0.416 9
0.322 0.065 -0.428 8
# end
#Thu Feb 26 20:32:34 GMT+08:00 2015 
