# Supplementary material for: Abnormal Gait Behavior Detection for Elderly Based on Enhanced Wigner-Ville Analysis and Cloud Incremental SVM Learning
Source: Hindawi journal article supplement (doi:10.1155/2016/5869238), 2016-01-01
Supplement: f1 [file 5869238.f1.zip › Supplementary Materials/Original Data/Backward fall Ending sitting/original__83.txt]

# Accelerometer Values
# filename:  original__83.txt
# Saving start time: Thu Feb 26 20:32:38 GMT+08:00 2015

# sensor resolution: 0.0095825195m/s^2
#Sensorvendor: KIONIX, name: KX023 Accelerometer, type: 1,version : 1, range 39.240005

# X value, Y value, Z value, time diff in ms
0.016 -0.036 -0.38 8
0.201 0.006 -0.451 8
0.393 0.048 -0.412 9
0.496 0.059 -0.292 8
0.446 0.053 -0.263 9
0.454 0.064 -0.112 8
0.43 0.068 0.018 8
0.398 0.066 0.089 7
0.349 0.065 0.115 10
0.294 0.066 0.102 9
0.24 0.066 0.059 8
0.216 0.059 0.053 8
0.165 0.058 0.0 9
0.139 0.063 -0.033 8
0.14 0.066 -0.052 9
0.135 0.061 -0.056 8
0.109 0.052 -0.04 8
0.097 0.045 0.005 9
0.087 0.04 0.005 8
0.117 0.037 0.052 7
0.153 0.031 0.08 10
0.129 0.014 0.104 8
0.062 -0.011 0.12 9
0.021 -0.025 0.118 8
0.029 -0.02 0.1 8
0.026 -0.018 0.09 9
0.063 -0.013 0.07 8
0.097 -0.017 0.058 9
0.086 -0.026 0.05 8
0.025 -0.03 0.041 8
-0.028 -0.03 0.029 9
-0.025 -0.027 0.026 7
-0.007 -0.028 0.013 10
0.073 -0.037 0.001 8
0.144 -0.072 0.002 8
0.15 -0.102 0.054 9
0.116 -0.102 0.155 8
0.096 -0.096 0.241 9
0.086 -0.086 0.216 8
0.106 -0.094 0.238 8
0.134 -0.098 0.217 9
0.135 -0.082 0.175 8
0.101 -0.07 0.123 8
0.045 -0.07 0.057 7
-0.003 -0.071 -0.009 10
-0.002 -0.064 -0.008 9
-0.031 -0.051 -0.05 8
-0.032 -0.035 -0.069 8
-0.024 -0.02 -0.076 9
-0.006 0.01 -0.073 8
0.044 0.025 -0.075 9
0.109 0.017 -0.073 8
0.098 0.016 -0.066 8
0.148 0.0 -0.047 9
0.173 -0.018 -0.021 8
0.19 -0.047 0.001 7
0.196 -0.087 0.021 10
0.162 -0.098 0.067 8
0.087 -0.08 0.123 9
0.078 -0.072 0.111 8
-0.009 -0.056 0.122 9
-0.059 -0.037 0.072 8
-0.057 -0.031 0.0 8
-0.053 -0.036 -0.054 9
-0.075 -0.032 -0.086 8
-0.067 -0.028 -0.111 8
-0.08 -0.025 -0.1 9
-0.063 -0.013 -0.12 7
-0.032 -0.016 -0.131 10
-0.018 -0.032 -0.123 8
-0.041 -0.02 -0.084 8
-0.079 -0.001 -0.042 9
-0.071 0.0 -0.038 8
-0.085 -0.011 -0.013 9
-0.08 -0.025 0.002 8
-0.069 -0.028 0.016 8
-0.049 -0.013 0.03 9
-0.023 0.007 0.048 8
0.014 0.02 0.066 9
0.012 0.018 0.059 6
0.073 0.012 0.064 10
0.12 -0.013 0.069 9
0.108 -0.019 0.094 8
0.06 -0.006 0.127 9
0.017 -0.013 0.144 8
-0.018 -0.039 0.147 8
-0.016 -0.035 0.132 9
-0.043 -0.041 0.132 8
-0.05 -0.024 0.113 9
-0.018 -0.008 0.069 8
0.036 0.003 0.028 8
0.066 -0.005 0.015 7
0.043 -0.025 0.035 10
0.039 -0.022 0.032 9
-0.025 -0.029 0.055 8
-0.073 -0.046 0.055 8
-0.069 -0.08 0.02 9
-0.032 -0.097 -0.03 8
0.003 -0.085 -0.073 8
0.012 -0.06 -0.105 9
0.011 -0.054 -0.094 8
-0.011 -0.04 -0.12 9
-0.047 -0.049 -0.137 8
-0.083 -0.07 -0.135 7
-0.124 -0.086 -0.117 10
-0.152 -0.107 -0.093 8
-0.137 -0.096 -0.083 9
-0.138 -0.122 -0.051 8
-0.128 -0.139 -0.004 8
-0.117 -0.141 0.043 9
-0.1 -0.13 0.083 8
-0.075 -0.119 0.111 9
-0.06 -0.113 0.117 8
-0.054 -0.101 0.105 8
-0.046 -0.087 0.09 9
-0.035 -0.055 0.05 6
-0.016 -0.02 0.005 11
0.008 0.02 -0.03 8
0.013 0.071 -0.045 8
-0.007 0.111 -0.043 9
-0.006 0.1 -0.039 8
-0.013 0.121 -0.026 9
0.012 0.12 -0.014 8
0.038 0.089 0.005 8
0.039 0.045 0.025 9
0.023 -0.007 0.035 8
-0.004 -0.06 0.034 8
-0.003 -0.054 0.031 7
-0.041 -0.079 0.021 10
-0.068 -0.085 -0.006 9
-0.063 -0.1 -0.044 8
-0.047 -0.117 -0.066 8
-0.057 -0.129 -0.071 9
-0.11 -0.139 -0.064 8
-0.099 -0.125 -0.057 9
-0.171 -0.138 -0.05 8
-0.218 -0.147 -0.061 8
-0.231 -0.135 -0.083 9
-0.237 -0.114 -0.106 8
-0.213 -0.103 -0.096 7
-0.278 -0.053 -0.158 10
-0.25 -0.047 -0.142 8
-0.233 -0.024 -0.187 9
-0.16 -0.001 -0.235 8
-0.103 0.028 -0.267 9
-0.085 0.021 -0.259 8
-0.088 -0.009 -0.216 8
-0.079 -0.008 -0.194 9
-0.093 -0.056 -0.122 8
-0.1 -0.126 -0.038 8
-0.118 -0.176 0.041 9
-0.104 -0.188 0.113 7
-0.007 -0.196 0.163 10
0.112 -0.209 0.154 8
0.101 -0.188 0.139 8
0.158 -0.171 0.092 9
0.127 -0.131 0.043 8
0.061 -0.114 -0.004 9
0.025 -0.124 -0.038 8
0.005 -0.14 -0.073 8
-0.036 -0.165 -0.11 9
-0.033 -0.149 -0.099 8
-0.079 -0.186 -0.101 9
-0.101 -0.214 -0.069 6
-0.104 -0.23 -0.034 10
-0.077 -0.228 -0.01 9
0.003 -0.214 0.006 8
0.115 -0.189 0.005 9
0.104 -0.17 0.005 8
0.182 -0.149 -0.018 8
0.233 -0.134 -0.04 9
0.288 -0.126 -0.072 8
0.341 -0.122 -0.135 9
0.348 -0.117 -0.187 8
0.285 -0.113 -0.203 8
0.256 -0.102 -0.182 7
0.171 -0.096 -0.188 10
0.132 -0.09 -0.158 8
0.153 -0.088 -0.124 9
0.236 -0.084 -0.135 8
0.35 -0.096 -0.151 9
0.418 -0.119 -0.15 8
0.376 -0.107 -0.135 8
0.386 -0.138 -0.089 9
0.365 -0.16 -0.021 8
0.36 -0.164 -0.026 9
0.393 -0.146 -0.064 8
0.354 -0.131 -0.058 7
0.328 -0.13 -0.261 10
0.257 -0.163 -0.322 8
0.202 -0.207 -0.049 9
0.159 -0.294 0.171 8
0.14 -0.44 0.247 8
0.121 -0.576 0.16 9
0.168 -0.569 -0.046 8
0.152 -0.512 -0.041 9
0.259 -0.371 -0.309 8
0.24 -0.341 -0.689 8
0.101 -0.315 -1.037 9
0.092 -0.139 -1.052 6
0.257 -0.025 -0.808 10
0.405 -0.006 -0.586 9
0.365 -0.006 -0.527 8
0.339 0.081 -0.336 9
0.258 -0.016 -0.291 8
0.201 -0.329 -0.62 8
0.095 -0.435 -1.064 9
0.005 -0.383 -1.368 8
0.042 -0.349 -1.473 9
0.038 -0.314 -1.326 8
0.218 -0.324 -1.254 8
0.432 -0.381 -1.059 7
0.611 -0.516 -0.822 10
0.685 -0.652 -0.69 9
0.583 -0.692 -0.802 8
0.385 -0.632 -0.92 8
0.347 -0.568 -0.828 9
0.198 -0.629 -0.679 8
0.083 -0.863 -0.421 9
-0.051 -1.12 -0.241 8
-0.157 -1.266 -0.166 8
-0.13 -1.218 -0.158 9
-0.117 -1.096 -0.142 8
0.053 -0.966 -0.219 7
0.22 -0.803 -0.396 10
0.294 -0.608 -0.58 8
0.359 -0.442 -0.591 9
0.516 -0.368 -0.349 8
0.535 -0.361 -0.078 8
0.482 -0.324 -0.07 9
0.209 -0.388 -0.002 8
-0.225 -0.426 -0.122 9
-0.611 -0.303 -0.275 8
-0.939 -0.125 -0.43 8
-1.052 0.272 -0.332 9
-0.947 0.245 -0.299 7
-0.698 0.819 0.407 10
-0.317 1.164 1.704 8
0.162 1.235 3.191 8
0.552 1.256 4.268 9
0.607 1.328 4.413 8
0.455 1.479 3.532 9
0.353 1.845 2.316 8
0.318 1.66 2.084 8
0.45 2.153 1.288 9
0.69 2.481 1.235 8
0.866 2.628 1.904 9
1.156 2.713 3.141 6
1.742 2.647 4.576 10
2.416 2.446 5.335 9
2.174 2.201 4.802 8
2.428 2.315 4.091 8
2.197 2.83 2.241 9
1.718 3.403 0.358 8
0.861 3.786 -0.98 9
-0.078 3.708 -1.214 8
-0.07 3.337 -1.092 8
-0.618 3.053 -0.623 9
-0.714 2.996 -0.451 8
-0.479 2.954 -0.572 7
-0.123 2.557 -0.497 10
0.152 1.819 0.131 8
0.134 0.989 1.283 9
0.12 0.89 1.154 8
-0.384 0.306 2.51 9
-1.357 0.108 3.44 8
-2.426 0.544 3.474 8
-2.549 1.859 2.564 9
-0.438 2.575 0.498 8
2.974 1.883 -2.157 9
2.676 1.695 -1.941 8
4.925 0.95 -3.213 7
5.141 0.654 -2.296 10
4.151 0.172 -0.53 8
2.755 -0.468 0.453 9
1.35 -0.914 -0.184 8
0.088 -1.206 -2.195 8
0.079 -1.085 -1.976 9
-1.124 -1.259 -4.749 8
-2.045 -1.578 -7.44 8
-3.176 -2.339 -9.199 9
-5.131 -2.654 -10.105 8
-7.189 -2.214 -10.022 9
-6.47 -1.992 -9.02 6
-7.608 -1.358 -7.325 10
-7.129 -0.516 -3.846 9
-5.06 0.274 -0.268 8
-2.133 0.481 1.034 9
0.226 0.433 0.501 8
0.98 0.669 -0.276 8
0.882 1.103 -1.177 9
0.794 0.992 -1.06 8
-1.83 1.626 -2.171 9
-3.397 2.18 -3.461 8
-3.8 2.46 -4.649 8
-3.057 2.751 -5.367 7
-1.423 2.974 -5.074 10
-1.28 2.676 -4.567 9
0.879 2.244 -2.862 8
2.484 1.665 1.112 8
3.094 1.314 5.836 9
3.107 0.785 8.944 8
2.846 0.35 10.433 9
2.314 0.092 10.096 8
2.083 0.083 9.087 8
1.332 -0.214 7.159 9
0.296 -0.511 4.209 8
-0.746 -0.784 1.241 7
-1.228 -0.978 -0.912 10
-0.854 -1.123 -1.843 8
0.215 -1.399 -1.64 9
0.194 -1.259 -1.476 8
1.479 -1.696 -0.642 8
2.492 -2.101 0.41 9
3.113 -2.35 1.376 8
3.4 -2.481 2.23 9
3.249 -2.599 2.937 8
2.716 -2.689 3.211 8
2.445 -2.42 2.89 9
1.653 -2.454 2.575 6
0.691 -2.427 1.697 11
-0.241 -2.371 0.516 8
-0.959 -2.253 -0.625 8
-1.41 -2.054 -1.345 9
-1.609 -1.799 -1.488 8
-1.448 -1.619 -1.339 9
-1.392 -1.376 -1.163 8
-1.111 -1.151 -0.891 8
-0.679 -0.958 -0.738 9
-0.229 -0.776 -0.823 8
0.114 -0.527 -0.977 8
0.103 -0.475 -0.879 7
0.387 -0.272 -0.964 10
0.449 -0.122 -1.029 9
0.281 0.116 -1.048 8
0.095 0.32 -0.98 8
-0.143 0.415 -0.851 9
-0.411 0.436 -0.538 8
-0.37 0.392 -0.484 9
-0.558 0.312 -0.007 8
-0.636 0.15 0.52 8
-0.637 0.0 0.985 9
-0.58 -0.143 1.234 8
-0.46 -0.29 1.244 7
-0.258 -0.345 1.131 10
-0.232 -0.311 1.018 8
-0.057 -0.26 0.849 9
-0.072 -0.138 0.579 8
-0.266 0.042 0.253 9
-0.561 0.194 0.004 8
-0.886 0.247 -0.121 8
-1.087 0.242 -0.116 9
-0.978 0.218 -0.105 8
-0.951 0.154 0.145 9
-0.674 0.051 0.506 8
-0.27 -0.03 0.66 7
0.061 -0.088 0.581 10
0.217 -0.071 0.309 8
0.15 0.011 -0.082 8
0.135 0.01 -0.074 9
-0.186 0.078 -0.462 8
-0.65 0.075 -0.674 9
-1.046 0.052 -0.572 8
-1.174 0.077 -0.151 8
-0.949 0.122 0.369 9
-0.457 0.076 0.65 8
-0.412 0.069 0.585 9
0.177 -0.081 0.579 6
0.679 -0.159 0.332 10
0.87 -0.131 -0.048 9
0.674 -0.063 -0.393 8
0.278 0.011 -0.421 9
-0.151 0.051 -0.272 8
-0.136 0.046 -0.245 8
-0.378 0.03 0.158 9
-0.308 -0.165 0.715 8
0.015 -0.439 0.98 9
0.483 -0.574 0.924 8
0.861 -0.612 0.547 8
0.774 -0.551 0.492 7
0.864 -0.558 0.15 10
0.713 -0.476 0.078 8
0.441 -0.3 0.123 9
0.076 -0.253 0.112 8
-0.223 -0.325 0.014 9
-0.316 -0.339 0.0 8
-0.284 -0.305 0.0 8
-0.209 -0.282 0.115 9
-0.067 -0.291 0.129 8
0.194 -0.204 0.13 9
0.569 -0.017 0.25 8
0.825 -0.066 0.35 7
0.87 -0.315 0.447 10
0.783 -0.283 0.403 8
0.703 -0.461 0.53 9
0.512 -0.503 0.591 8
0.276 -0.479 0.615 8
0.072 -0.438 0.591 9
-0.107 -0.368 0.438 8
-0.234 -0.278 0.232 9
-0.21 -0.25 0.209 8
-0.274 -0.141 0.045 8
-0.237 -0.04 -0.063 9
-0.01 -0.041 -0.119 6
0.26 -0.042 -0.202 11
0.38 0.013 -0.253 8
0.249 0.047 -0.194 8
0.224 0.042 -0.174 9
-0.046 0.083 -0.09 8
-0.18 0.124 -0.036 8
-0.189 0.123 -0.038 9
-0.167 0.117 -0.074 8
-0.095 0.121 -0.108 9
0.008 0.121 -0.161 8
0.007 0.109 -0.145 8
0.047 0.125 -0.226 7
0.03 0.162 -0.283 10
0.02 0.204 -0.286 9
0.017 0.238 -0.263 8
0.025 0.288 -0.193 8
0.022 0.259 -0.077 9
0.101 0.251 -0.069 8
0.241 0.135 0.046 9
0.35 0.043 0.113 8
0.394 0.008 0.092 8
0.367 -0.02 0.076 9
0.292 -0.042 0.131 8
0.262 -0.037 0.118 7
0.14 -0.053 0.189 10
-0.032 -0.05 0.221 8
-0.193 -0.012 0.187 9
-0.332 0.048 0.096 8
-0.426 0.139 -0.123 8
-0.442 0.233 -0.445 9
-0.398 0.21 -0.4 8
-0.411 0.298 -0.665 9
-0.424 0.389 -0.792 8
-0.434 0.466 -0.919 8
-0.424 0.492 -1.065 9
-0.349 0.41 -0.957 7
-0.235 0.262 -0.584 10
-0.211 0.236 -0.525 8
-0.06 0.053 -0.13 8
0.106 -0.139 0.209 9
0.17 -0.249 0.465 8
0.166 -0.329 0.624 9
0.118 -0.351 0.656 8
0.02 -0.303 0.532 8
0.018 -0.272 0.479 9
-0.06 -0.224 0.19 8
-0.109 -0.148 -0.173 9
-0.129 -0.062 -0.423 6
-0.131 -0.009 -0.469 10
-0.112 -0.039 -0.289 9
-0.069 -0.104 0.02 8
-0.062 -0.094 0.018 9
-0.016 -0.127 0.288 8
0.011 -0.149 0.459 8
0.016 -0.163 0.555 9
-0.01 -0.153 0.569 8
-0.034 -0.128 0.488 9
-0.031 -0.115 0.439 8
0.0 -0.091 0.395 8
0.049 -0.063 0.103 7
0.044 -0.041 -0.071 10
-0.021 -0.027 -0.135 8
-0.095 -0.022 -0.043 9
-0.163 -0.025 0.108 8
-0.147 -0.023 0.097 9
-0.189 -0.031 0.209 8
-0.199 -0.043 0.313 8
-0.197 -0.045 0.406 9
-0.178 -0.043 0.398 8
-0.145 -0.035 0.306 9
-0.092 -0.024 0.201 8
-0.082 -0.022 0.181 7
0.076 -0.015 0.07 10
0.302 -0.003 -0.093 8
0.403 0.007 -0.209 9
0.315 0.0 -0.108 8
0.121 -0.01 0.084 8
-0.044 -0.013 0.2 9
-0.04 -0.012 0.18 8
-0.129 -0.01 0.199 9
-0.164 -0.004 0.143 8
-0.156 0.0 0.055 8
-0.097 0.003 -0.064 9
-0.005 0.016 -0.233 6
0.093 0.023 -0.376 10
0.084 0.02 -0.338 9
0.169 0.017 -0.366 8
0.174 0.015 -0.31 9
0.089 0.005 -0.185 8
-0.012 -0.012 -0.009 8
-0.091 -0.032 0.135 9
-0.118 -0.069 0.218 8
-0.106 -0.062 0.196 9
-0.108 -0.106 0.221 8
-0.089 -0.144 0.188 8
-0.051 -0.124 0.09 7
-0.014 -0.066 -0.073 10
0.013 -0.022 -0.224 9
0.011 -0.02 -0.34 8
0.014 -0.018 -0.306 8
0.005 0.037 -0.335 9
-0.019 0.059 -0.2 8
-0.053 0.056 -0.041 9
-0.079 0.033 0.042 8
-0.07 0.01 0.097 8
-0.063 0.009 0.088 9
-0.023 0.0 0.134 8
0.0 0.006 0.148 7
0.017 0.014 0.134 10
0.029 0.027 0.043 8
0.043 0.064 -0.053 9
0.004 0.099 -0.152 8
0.003 0.089 -0.137 8
-0.109 0.078 -0.275 9
-0.259 0.043 -0.4 8
-0.359 0.018 -0.307 9
-0.327 0.006 -0.126 8
-0.214 -0.009 -0.1 8
-0.101 -0.02 -0.086 9
-0.091 -0.018 -0.077 7
-0.018 -0.031 0.002 10
0.001 -0.035 0.129 8
-0.028 -0.03 0.219 8
-0.06 -0.024 0.326 9
-0.081 -0.014 0.386 8
-0.129 -0.009 0.349 9
-0.116 -0.008 0.314 8
-0.183 -0.009 0.266 8
-0.253 -0.006 0.192 9
-0.344 0.006 0.025 8
-0.378 0.015 -0.121 9
-0.34 0.014 -0.109 6
-0.302 0.013 -0.088 10
-0.305 0.02 0.033 9
-0.401 -0.011 0.141 8
-0.476 -0.163 0.203 8
-0.428 -0.28 0.257 9
-0.316 -0.199 0.284 8
-0.186 -0.085 0.238 9
-0.167 -0.077 0.214 8
-0.088 -0.032 0.143 8
-0.128 -0.004 0.078 9
-0.173 0.008 0.024 8
-0.235 -0.041 0.014 7
-0.346 -0.05 0.026 10
-0.398 -0.031 0.013 8
-0.358 -0.028 0.012 9
-0.358 -0.036 0.001 8
-0.321 0.0 0.011 9
-0.18 0.01 0.005 8
0.026 0.007 -0.012 8
0.155 0.014 -0.005 9
0.129 0.008 0.006 8
0.116 0.007 0.006 9
0.007 -0.013 -0.045 8
-0.098 -0.088 -0.087 7
-0.2 -0.086 -0.014 10
-0.359 -0.02 0.061 8
-0.595 -0.017 0.065 9
-0.536 -0.015 0.085 8
-0.774 -0.014 0.076 8
-0.7 0.001 0.101 9
-0.258 -0.048 -0.072 8
0.225 -0.096 -0.335 8
0.567 -0.035 -0.469 9
0.567 0.009 -0.416 8
0.51 0.008 -0.375 9
0.219 0.052 -0.164 6
-0.16 0.083 0.033 10
-0.456 0.107 0.107 9
-0.521 0.137 0.06 8
-0.456 0.19 -0.087 9
-0.434 0.255 -0.224 8
-0.39 0.229 -0.202 8
-0.351 0.343 -0.204 9
-0.183 0.416 -0.178 8
0.025 0.386 -0.197 9
0.26 0.392 -0.198 8
0.499 0.427 -0.141 8
0.449 0.385 -0.127 7
0.586 0.371 0.028 10
0.598 0.293 0.285 9
# end
#Thu Feb 26 20:32:43 GMT+08:00 2015.
