# Supplementary material for: Abnormal Gait Behavior Detection for Elderly Based on Enhanced Wigner-Ville Analysis and Cloud Incremental SVM Learning
Source: Hindawi journal article supplement (doi:10.1155/2016/5869238), 2016-01-01
Supplement: f1 [file 5869238.f1.zip › Supplementary Materials/Original Data/Backward fall Ending sitting/original__84.txt]

# Accelerometer Values
# filename:  original__84.txt
# Saving start time: Thu Feb 26 20:33:43 GMT+08:00 2015

# sensor resolution: 0.0095825195m/s^2
#Sensorvendor: KIONIX, name: KX023 Accelerometer, type: 1,version : 1, range 39.240005

# X value, Y value, Z value, time diff in ms
-0.02 -0.035 -0.369 8
0.026 -0.061 -0.141 8
0.051 -0.089 0.076 9
0.046 -0.08 0.068 8
0.033 -0.113 0.201 9
0.011 -0.137 0.252 8
-0.025 -0.127 0.257 8
-0.067 -0.088 0.228 7
-0.086 -0.045 0.132 10
-0.079 -0.004 -0.02 9
-0.071 -0.004 -0.018 8
-0.045 0.039 -0.162 8
-0.001 0.064 -0.246 9
0.048 0.069 -0.242 8
0.075 0.056 -0.153 8
0.081 0.027 -0.014 9
0.073 0.024 -0.012 8
0.057 -0.01 -0.011 9
0.024 -0.048 0.201 8
0.006 -0.088 0.22 7
0.006 -0.114 0.198 10
0.003 -0.114 0.166 8
0.007 -0.115 0.145 9
0.006 -0.103 0.131 8
0.01 -0.105 0.134 8
-0.003 -0.092 0.147 9
-0.012 -0.079 0.153 8
-0.018 -0.08 0.147 9
-0.047 -0.085 0.132 8
-0.09 -0.088 0.114 8
-0.081 -0.079 0.102 9
-0.114 -0.099 0.086 6
-0.128 -0.113 0.076 11
-0.127 -0.108 0.075 8
-0.108 -0.106 0.066 8
-0.073 -0.076 0.055 9
-0.034 -0.028 0.051 8
-0.03 -0.026 0.046 9
-0.004 0.004 0.046 8
0.01 0.008 0.048 8
0.023 -0.005 0.05 9
0.046 -0.018 0.052 8
0.074 -0.024 0.055 9
0.067 -0.022 0.049 6
0.103 -0.043 0.054 10
0.14 -0.085 0.063 9
0.154 -0.108 0.089 8
0.147 -0.098 0.113 8
0.139 -0.084 0.11 9
0.139 -0.094 0.083 8
0.125 -0.084 0.074 9
0.117 -0.121 0.045 8
0.079 -0.152 0.024 8
0.035 -0.168 0.002 9
0.0 -0.173 -0.018 8
-0.037 -0.152 -0.031 7
-0.061 -0.119 -0.038 10
-0.055 -0.107 -0.034 8
-0.05 -0.069 -0.04 9
-0.04 -0.031 -0.041 8
-0.029 -0.002 -0.039 8
-0.017 0.001 -0.044 9
-0.011 0.01 -0.042 8
-0.011 0.03 -0.028 9
-0.01 0.027 -0.025 8
-0.01 0.024 -0.016 8
-0.009 0.015 -0.014 9
-0.006 0.01 -0.003 7
-0.004 0.033 0.005 10
-0.002 0.063 0.014 8
0.004 0.088 0.024 8
0.004 0.079 0.022 9
0.019 0.107 0.028 8
0.025 0.12 0.037 9
0.018 0.119 0.049 8
0.01 0.113 0.048 8
0.008 0.1 0.033 9
0.007 0.09 0.03 8
-0.003 0.074 0.013 9
-0.029 0.051 0.0 6
-0.054 0.027 -0.004 10
-0.079 -0.008 0.001 9
-0.112 -0.057 0.014 8
-0.149 -0.102 0.02 9
-0.134 -0.092 0.018 8
-0.168 -0.113 0.011 8
-0.191 -0.105 -0.006 9
-0.188 -0.08 -0.038 8
-0.149 -0.043 -0.074 9
-0.114 -0.003 -0.075 8
-0.113 0.018 -0.045 8
-0.101 0.016 -0.041 7
-0.13 0.005 -0.011 10
-0.201 -0.013 0.01 8
-0.256 -0.019 -0.004 9
-0.245 -0.015 -0.094 8
-0.233 0.0 -0.206 9
-0.216 0.016 -0.296 8
-0.194 0.014 -0.266 8
-0.142 0.015 -0.343 9
-0.028 0.057 -0.257 8
0.089 0.158 -0.086 9
0.166 0.07 -0.107 8
0.15 0.063 -0.096 7
0.172 -0.073 -0.072 10
0.072 -0.015 0.048 8
0.009 -0.055 0.058 9
0.042 -0.153 -0.049 8
0.096 -0.116 -0.252 8
0.157 -0.051 -0.395 9
0.189 0.046 -0.325 8
0.17 0.041 -0.293 9
0.169 0.234 -0.05 8
0.128 0.277 -0.084 8
0.103 0.044 -0.306 9
0.039 -0.1 -0.357 6
-0.188 0.006 -0.41 10
-0.341 0.082 -0.48 9
-0.307 0.073 -0.432 8
-0.091 -0.14 -0.456 9
0.221 -0.355 -0.529 8
0.375 -0.374 -0.586 8
0.457 -0.436 -0.449 9
0.495 -0.681 -0.172 8
0.446 -0.613 -0.155 9
0.517 -0.871 0.021 8
0.648 -0.915 -0.091 8
0.72 -0.813 -0.414 7
0.714 -0.717 -0.946 10
0.684 -0.776 -1.69 9
0.681 -0.788 -2.276 8
0.613 -0.709 -2.049 8
0.794 -0.359 -2.08 9
0.745 -0.064 -1.875 8
0.263 -0.225 -1.788 9
-0.193 -0.5 -1.63 8
-0.578 -0.727 -1.584 8
-0.878 -0.947 -1.666 9
-0.79 -0.852 -1.5 8
-0.806 -0.926 -1.488 7
-0.56 -0.784 -1.409 10
-0.271 -0.566 -1.392 8
-0.063 -0.398 -1.428 9
0.081 -0.303 -1.387 8
0.173 -0.25 -1.218 8
0.156 -0.225 -1.096 9
0.219 -0.189 -0.89 8
0.304 -0.16 -0.717 9
0.409 -0.141 -0.607 8
0.497 -0.127 -0.533 8
0.558 -0.065 -0.456 9
0.503 -0.059 -0.41 7
0.557 0.192 -0.288 10
0.558 0.513 -0.053 8
0.514 0.666 0.266 8
0.448 0.584 0.457 9
0.314 0.338 0.36 8
0.05 0.175 0.055 9
0.045 0.157 0.05 8
-0.282 0.124 -0.208 8
-0.541 0.158 -0.215 9
-0.676 0.337 0.39 8
-0.534 0.611 1.649 9
-0.048 0.995 2.85 6
0.599 1.307 3.325 10
0.539 1.176 2.992 9
1.055 1.197 2.814 8
0.909 1.075 2.242 9
0.344 1.288 1.652 8
0.234 1.821 1.283 8
0.641 1.965 1.06 9
0.979 1.918 1.028 8
0.881 1.727 0.925 8
0.867 1.954 1.16 9
0.89 2.078 1.59 8
1.256 1.922 2.233 7
1.698 1.703 2.951 10
1.844 1.586 3.368 8
1.659 1.428 3.031 9
1.678 1.42 3.06 8
1.821 1.426 2.563 9
1.92 1.568 1.624 8
1.938 1.716 0.633 8
2.071 1.675 -0.004 9
2.121 1.55 -0.106 8
1.909 1.395 -0.095 9
1.736 1.191 0.186 8
1.569 0.93 0.684 7
1.547 0.749 1.089 10
1.551 0.633 1.094 8
1.409 0.525 0.899 9
1.152 0.415 0.872 8
1.037 0.374 0.785 8
0.863 0.265 1.039 9
0.891 0.128 1.448 8
1.164 -0.019 1.859 8
1.615 -0.1 2.128 9
2.021 -0.033 2.063 8
2.3 0.241 1.507 9
2.07 0.217 1.357 6
2.258 0.675 0.628 10
2.573 1.458 0.345 9
3.741 2.194 0.387 8
5.207 2.354 0.196 9
5.731 2.134 -0.04 8
5.157 1.921 0.148 8
4.634 1.463 0.133 9
3.498 0.804 0.427 8
2.279 0.066 0.079 9
0.876 -0.455 -1.216 8
-0.292 -1.09 -3.228 8
-0.263 -0.981 -2.905 7
-1.342 -1.871 -5.39 10
-3.001 -2.152 -7.579 9
-4.433 -1.776 -8.384 8
-4.732 -1.301 -7.556 8
-4.139 -0.887 -5.613 9
-3.411 -0.484 -3.446 8
-2.887 -0.173 -1.853 8
-2.598 -0.155 -1.667 9
-2.358 0.003 -0.975 8
-2.484 0.003 -1.042 9
-2.996 -0.122 -1.694 8
-3.614 -0.306 -2.675 7
-3.629 -0.622 -3.447 10
-3.042 -0.837 -3.903 8
-2.738 -0.753 -3.513 9
-2.165 -0.676 -3.655 8
-1.731 -0.503 -3.306 8
-1.47 -0.3 -2.592 9
-1.303 -0.093 -1.643 8
-1.188 -0.023 -0.88 9
-1.024 -0.073 -0.474 8
-0.921 -0.066 -0.427 8
-0.768 -0.264 -0.232 9
-0.644 -0.592 -0.234 7
-0.476 -0.929 -0.49 10
-0.457 -1.298 -0.826 8
-0.541 -1.539 -0.738 8
-0.487 -1.385 -0.664 9
-0.5 -1.411 0.072 8
-0.475 -1.125 1.187 9
-0.284 -0.716 2.262 8
0.456 -0.143 3.147 8
1.557 0.673 3.635 9
2.484 1.49 3.473 8
2.236 1.341 3.125 9
2.59 1.927 2.138 6
1.829 2.139 0.27 10
0.149 2.188 -1.686 9
-1.88 2.176 -2.713 8
-3.679 2.433 -2.377 8
-4.579 3.03 -1.289 9
-4.121 2.727 -1.16 8
-4.13 3.252 -0.518 9
-3.543 3.291 -0.484 8
-2.667 2.839 -0.254 8
-1.848 2.092 0.561 9
-1.364 1.277 1.828 8
-1.227 1.149 1.645 7
-1.335 0.478 2.858 10
-1.831 -0.031 3.475 8
-2.166 -0.506 3.473 9
-2.035 -1.032 3.109 8
-1.465 -1.669 2.533 9
-0.499 -1.82 1.943 8
-0.449 -1.638 1.749 8
0.699 -1.338 1.121 9
1.644 -1.2 0.54 8
2.062 -1.17 0.285 8
1.833 -1.18 0.275 9
1.14 -1.132 0.474 7
0.334 -1.173 0.533 10
0.301 -1.056 0.479 8
-0.21 -1.17 0.543 8
-0.278 -1.193 0.777 9
-0.028 -0.985 0.824 8
0.405 -0.816 0.587 9
0.677 -0.835 0.343 8
0.603 -0.848 0.337 8
0.543 -0.763 0.303 9
0.211 -0.75 0.384 8
-0.23 -0.667 0.428 9
-0.544 -0.574 0.391 6
-0.651 -0.463 0.264 10
-0.595 -0.337 0.0 9
-0.407 -0.236 -0.305 8
-0.366 -0.212 -0.275 9
-0.111 -0.189 -0.427 8
0.072 -0.202 -0.423 8
0.166 -0.237 -0.292 9
0.216 -0.295 -0.052 8
0.196 -0.332 0.135 9
0.177 -0.299 0.122 8
0.145 -0.343 0.11 8
0.111 -0.433 0.119 7
0.001 -0.527 0.224 10
-0.143 -0.587 0.39 9
-0.219 -0.615 0.472 8
-0.2 -0.598 0.458 8
-0.18 -0.538 0.413 9
-0.078 -0.464 0.352 8
0.073 -0.345 0.239 8
0.124 -0.221 0.172 9
-0.158 -0.216 0.047 8
-0.692 -0.247 -0.11 9
-1.001 -0.251 -0.03 8
-0.9 -0.225 -0.027 7
-0.831 -0.174 0.228 10
-0.354 -0.057 0.552 8
0.221 -0.041 0.697 9
0.421 -0.042 0.523 8
0.203 -0.089 0.239 8
-0.266 -0.171 0.061 9
-0.239 -0.154 0.055 8
-0.641 -0.102 0.092 9
-0.857 0.109 0.122 8
-0.919 0.325 -0.153 8
-0.722 0.264 -0.459 9
-0.65 0.237 -0.413 6
0.232 0.167 -0.409 11
0.209 0.15 -0.368 8
0.557 0.142 -0.252 8
0.566 -0.015 0.019 9
0.422 -0.098 0.358 8
0.243 -0.027 0.705 8
0.102 -0.054 0.706 9
0.092 -0.049 0.635 8
0.071 -0.166 0.41 9
0.06 -0.188 0.317 8
0.04 -0.154 0.282 8
0.017 -0.049 0.144 7
0.006 0.033 0.041 10
0.083 -0.077 0.059 9
0.074 -0.069 0.053 8
0.172 -0.192 0.045 8
0.22 -0.226 -0.025 9
0.223 -0.203 -0.108 8
0.282 -0.191 -0.285 9
0.375 -0.28 -0.574 8
0.248 -0.282 -0.734 8
0.223 -0.254 -0.66 9
-0.122 0.0 -0.604 8
-0.532 0.295 -0.451 7
-0.832 0.385 -0.269 10
-0.8 0.195 -0.073 8
-0.584 -0.046 0.048 9
-0.39 -0.135 0.094 8
-0.351 -0.121 0.084 9
-0.168 -0.15 0.112 8
-0.015 -0.155 0.104 8
0.095 -0.154 -0.019 9
0.241 -0.141 -0.159 8
0.444 -0.073 -0.042 8
0.4 -0.065 -0.038 9
0.536 0.003 0.083 7
0.52 -0.008 0.073 10
0.351 -0.053 0.143 8
0.087 -0.061 0.237 8
-0.166 -0.046 0.293 9
-0.28 -0.03 0.292 8
-0.252 -0.027 0.263 9
-0.213 -0.035 0.142 8
-0.005 -0.01 0.081 8
0.33 0.069 0.198 9
0.58 0.091 0.244 8
0.684 0.029 0.2 9
0.615 0.026 0.18 6
0.55 -0.036 0.165 10
0.355 -0.056 0.157 9
0.201 -0.074 0.12 8
0.158 -0.095 0.063 9
0.157 -0.123 0.038 8
0.125 -0.156 0.099 8
0.071 -0.16 0.172 9
0.064 -0.144 0.155 8
0.063 -0.178 0.261 9
0.064 -0.234 0.501 8
0.029 -0.214 0.738 8
0.004 -0.152 0.752 7
-0.008 -0.176 0.577 10
-0.007 -0.159 0.52 8
-0.082 -0.217 0.299 9
-0.236 -0.182 0.081 8
-0.358 -0.091 -0.102 9
-0.359 -0.031 -0.199 8
-0.261 -0.013 -0.232 8
-0.144 -0.011 -0.242 9
-0.129 -0.01 -0.218 8
-0.064 0.0 -0.199 9
-0.077 0.011 -0.165 8
-0.131 0.006 -0.108 7
-0.174 0.007 -0.074 10
-0.159 0.02 -0.104 8
-0.095 0.035 -0.161 9
-0.085 0.031 -0.145 8
0.001 0.047 -0.193 8
0.13 0.044 -0.177 9
0.29 0.036 -0.117 8
0.433 0.035 -0.071 9
0.508 0.006 -0.024 8
0.455 -0.008 0.025 8
0.41 -0.008 0.023 9
0.339 -0.053 -0.016 6
0.268 -0.106 0.02 10
0.086 -0.048 0.194 9
-0.082 0.028 0.242 8
-0.185 0.062 0.135 9
-0.259 0.084 -0.071 8
-0.233 0.075 -0.064 8
-0.251 0.088 -0.362 9
-0.237 0.098 -0.661 8
-0.18 0.117 -0.843 9
-0.112 0.147 -0.879 8
-0.117 0.145 -0.715 8
-0.105 0.131 -0.643 7
-0.159 0.097 -0.333 10
-0.202 0.069 -0.054 9
-0.208 0.041 0.125 8
-0.2 0.021 0.223 8
-0.189 0.026 0.139 9
-0.173 0.035 -0.118 8
-0.156 0.031 -0.106 9
-0.135 0.053 -0.363 8
-0.018 -0.099 -0.562 8
0.178 -0.244 -0.616 9
0.138 0.053 -0.352 8
-0.121 0.42 0.025 7
-0.192 0.308 0.207 10
-0.172 0.277 0.186 8
-0.134 0.013 0.249 9
-0.173 -0.063 0.341 8
-0.213 -0.11 0.442 8
-0.211 -0.154 0.534 9
-0.159 -0.184 0.58 8
-0.083 -0.204 0.528 9
-0.075 -0.183 0.475 8
0.025 -0.179 0.414 8
0.102 -0.147 0.417 9
0.068 -0.112 0.425 7
-0.022 -0.112 0.424 10
-0.095 -0.148 0.461 8
-0.086 -0.172 0.478 8
-0.077 -0.155 0.43 9
-0.126 -0.152 0.382 8
-0.112 -0.134 0.288 9
-0.11 -0.084 0.166 8
-0.1 -0.031 0.04 8
-0.083 -0.001 -0.043 9
-0.074 -0.001 -0.039 8
-0.067 0.014 -0.066 9
-0.057 0.021 -0.055 6
-0.023 0.031 -0.015 10
0.029 0.045 0.007 9
0.087 0.059 -0.025 8
0.152 0.065 -0.07 8
0.137 0.058 -0.063 9
0.129 0.058 -0.088 8
0.033 0.048 -0.114 9
-0.078 0.011 -0.109 8
-0.17 -0.051 -0.054 8
-0.2 -0.105 -0.016 9
-0.149 -0.132 -0.022 8
-0.134 -0.119 -0.02 7
-0.042 -0.13 -0.044 10
0.103 -0.107 -0.078 8
0.277 -0.051 -0.132 9
0.377 -0.001 -0.196 8
0.322 0.026 -0.192 9
0.166 0.038 -0.134 8
0.149 0.034 -0.12 8
-0.003 0.037 -0.116 9
-0.134 0.043 -0.135 8
-0.21 0.055 -0.16 9
-0.179 0.058 -0.21 8
-0.161 0.052 -0.189 7
-0.06 0.059 -0.244 10
0.061 0.055 -0.304 8
0.122 0.039 -0.355 8
0.063 0.059 -0.271 9
-0.053 0.078 -0.076 8
-0.101 0.021 0.038 9
-0.114 -0.003 -0.012 8
-0.102 -0.003 -0.011 8
-0.146 0.057 -0.071 9
-0.14 0.092 -0.004 8
-0.097 0.092 0.063 9
-0.017 0.079 0.093 6
0.02 0.072 0.077 10
-0.043 0.051 0.024 9
-0.039 0.046 0.022 8
-0.152 -0.026 0.069 9
-0.291 -0.104 0.237 8
-0.36 -0.168 0.353 8
-0.321 -0.235 0.319 9
-0.251 -0.256 0.305 8
-0.216 -0.151 0.257 9
-0.194 -0.136 0.232 8
-0.119 -0.006 0.06 8
-0.027 0.058 -0.125 7
-0.002 0.106 -0.238 10
0.006 0.125 -0.214 9
0.004 0.129 -0.111 8
-0.011 0.142 0.03 8
-0.01 0.128 0.027 9
-0.063 0.129 0.217 8
-0.169 0.117 0.379 8
-0.324 0.108 0.404 9
-0.482 0.078 0.351 8
-0.603 0.057 0.263 9
-0.543 0.051 0.236 8
-0.588 0.059 0.084 7
-0.537 0.099 -0.038 10
-0.368 0.176 -0.096 8
-0.131 0.244 -0.165 9
0.032 0.307 -0.289 8
0.086 0.403 -0.448 8
# end
#Thu Feb 26 20:33:47 GMT+08:00 20154
