# Supplementary material for: Abnormal Gait Behavior Detection for Elderly Based on Enhanced Wigner-Ville Analysis and Cloud Incremental SVM Learning
Source: Hindawi journal article supplement (doi:10.1155/2016/5869238), 2016-01-01
Supplement: f1 [file 5869238.f1.zip › Supplementary Materials/Original Data/Backward fall Ending sitting/original__85.txt]

# Accelerometer Values
# filename:  original__85.txt
# Saving start time: Thu Feb 26 20:33:52 GMT+08:00 2015

# sensor resolution: 0.0095825195m/s^2
#Sensorvendor: KIONIX, name: KX023 Accelerometer, type: 1,version : 1, range 39.240005

# X value, Y value, Z value, time diff in ms
0.179 -0.024 -0.11 11
0.179 -0.054 -0.023 8
0.136 -0.075 0.104 8
0.091 -0.098 0.229 9
0.072 -0.123 0.309 8
0.066 -0.141 0.333 8
0.053 -0.143 0.299 9
0.047 -0.128 0.269 8
0.059 -0.119 0.192 9
0.103 -0.103 0.113 8
0.138 -0.095 0.058 8
0.12 -0.097 0.031 7
0.044 -0.09 0.034 10
-0.031 -0.082 0.065 9
-0.028 -0.074 0.058 8
-0.034 -0.077 0.092 8
0.01 -0.078 0.102 9
0.032 -0.068 0.127 8
0.047 -0.059 0.154 9
0.059 -0.064 0.131 8
0.053 -0.057 0.118 8
0.017 -0.068 0.061 9
-0.042 -0.07 0.006 8
-0.067 -0.063 -0.046 7
-0.018 -0.048 -0.088 10
0.064 -0.035 -0.109 8
0.114 -0.03 -0.12 9
0.103 -0.027 -0.108 8
0.104 -0.028 -0.1 8
0.071 -0.03 -0.071 9
0.034 -0.022 -0.06 8
0.035 -0.008 -0.071 9
0.065 -0.001 -0.085 8
0.072 -0.004 -0.093 8
0.065 -0.003 -0.083 9
0.04 -0.007 -0.059 7
-0.004 -0.013 -0.014 10
-0.017 -0.024 0.014 8
0.017 -0.032 0.036 8
0.042 -0.034 0.064 9
0.062 -0.035 0.079 8
0.056 -0.031 0.071 9
0.077 -0.029 0.065 8
0.096 -0.023 0.045 8
0.123 -0.016 0.014 9
0.125 -0.01 0.006 8
0.081 -0.006 0.049 9
0.073 -0.005 0.044 6
0.0 -0.003 0.094 10
-0.042 -0.006 0.109 9
-0.027 -0.013 0.107 8
-0.01 -0.017 0.085 9
-0.01 -0.019 0.035 8
-0.022 -0.018 -0.019 8
-0.02 -0.016 -0.017 9
-0.013 -0.016 -0.076 8
0.011 -0.012 -0.12 9
0.013 0.003 -0.123 8
0.0 0.024 -0.094 8
-0.061 0.032 -0.053 7
-0.186 0.031 -0.01 10
-0.167 0.028 -0.009 8
-0.283 0.024 0.04 9
-0.334 0.009 0.096 8
-0.342 -0.008 0.105 9
-0.332 -0.015 0.066 8
-0.302 -0.014 -0.006 8
-0.238 -0.009 -0.109 9
-0.214 -0.008 -0.098 8
-0.106 0.0 -0.184 9
-0.017 0.022 -0.254 8
-0.005 0.056 -0.292 7
-0.029 0.09 -0.288 10
-0.037 0.089 -0.275 8
-0.028 0.057 -0.255 9
-0.025 0.051 -0.229 8
-0.005 0.032 -0.204 8
0.032 0.018 -0.167 9
0.108 -0.005 -0.118 8
0.208 -0.028 -0.048 9
0.297 -0.04 0.041 8
0.267 -0.036 0.037 8
0.337 -0.04 0.101 9
0.354 -0.041 0.129 6
0.326 -0.039 0.122 10
0.29 -0.039 0.09 9
0.247 -0.043 0.064 8
0.195 -0.049 0.044 9
0.176 -0.044 0.039 8
0.121 -0.057 0.033 8
0.079 -0.062 0.072 9
0.06 -0.056 0.147 8
0.076 -0.045 0.247 9
0.12 -0.033 0.308 8
0.168 -0.022 0.294 8
0.151 -0.02 0.265 7
0.195 -0.011 0.221 10
0.233 -0.007 0.211 9
0.267 -0.005 0.258 8
0.282 -0.007 0.342 8
0.246 -0.011 0.42 9
0.168 -0.021 0.463 8
0.151 -0.019 0.417 9
0.065 -0.035 0.435 8
-0.001 -0.053 0.426 8
-0.046 -0.06 0.389 9
-0.058 -0.044 0.329 8
-0.052 -0.039 0.296 7
-0.008 -0.015 0.117 10
0.068 0.004 0.106 8
0.127 0.016 0.008 9
0.141 0.02 -0.012 8
0.105 0.008 0.061 8
0.025 -0.021 0.156 9
-0.062 -0.047 0.207 8
-0.055 -0.042 0.186 9
-0.122 -0.039 0.175 8
-0.144 -0.022 0.088 8
-0.108 -0.001 -0.067 9
-0.011 0.022 -0.252 7
0.105 0.042 -0.405 10
0.17 0.053 -0.516 8
0.153 0.048 -0.464 8
0.121 0.045 -0.565 9
-0.008 0.038 -0.641 8
-0.139 0.031 -0.674 9
-0.217 0.009 -0.696 8
-0.274 -0.028 -0.736 8
-0.345 -0.063 -0.775 9
-0.31 -0.057 -0.697 8
-0.341 -0.083 -0.615 9
-0.218 -0.111 -0.402 6
0.038 -0.106 -0.151 10
0.369 -0.087 0.026 9
0.738 -0.068 0.079 8
0.969 -0.015 0.001 9
0.872 -0.013 0.0 8
0.998 0.084 -0.126 8
0.829 0.091 -0.555 9
0.318 -0.249 -1.338 8
-0.179 -0.777 -1.969 8
-0.393 -1.016 -2.184 9
-0.354 -0.914 -1.966 8
-0.509 -0.806 -1.768 7
-0.743 -0.67 -1.472 10
-0.741 -0.743 -1.294 8
-0.482 -0.963 -1.161 9
-0.124 -1.091 -0.986 8
0.095 -1.104 -0.84 9
0.085 -0.994 -0.756 8
0.075 -1.023 -0.791 8
-0.071 -1.025 -0.962 9
-0.29 -0.999 -1.185 8
-0.514 -1.015 -1.501 9
-0.621 -1.0 -1.818 8
-0.559 -0.9 -1.636 7
-0.485 -0.795 -1.719 10
-0.203 -0.703 -1.528 8
0.189 -0.645 -1.245 9
0.466 -0.58 -1.066 8
0.406 -0.614 -1.178 8
0.178 -0.733 -1.443 9
0.16 -0.76 -1.62 8
0.144 -0.684 -1.458 9
-0.103 -0.591 -1.477 8
-0.239 -0.451 -1.292 8
-0.405 -0.269 -0.978 9
-0.609 -0.085 -0.448 6
-0.828 0.055 0.187 10
-0.745 0.05 0.169 9
-0.884 0.214 0.631 8
-0.817 0.488 0.869 9
-0.51 0.913 0.922 8
-0.238 1.479 0.664 8
-0.197 2.514 0.802 9
-0.474 4.088 1.587 8
-0.426 3.679 1.428 9
-0.865 4.401 2.011 8
-0.58 3.288 2.004 8
0.001 2.186 1.91 7
0.303 2.037 2.073 10
0.768 2.024 2.081 9
1.342 2.036 1.977 8
1.208 1.832 1.779 8
1.621 1.874 1.813 9
1.601 1.82 2.075 8
1.126 1.685 2.527 8
0.405 1.649 3.037 9
0.008 1.62 3.185 8
0.007 1.458 2.866 9
0.198 1.41 2.54 8
0.767 1.581 2.065 7
1.407 1.913 1.428 10
1.75 2.16 0.647 8
1.688 2.264 0.049 9
1.319 2.308 -0.216 8
1.187 2.077 -0.194 8
0.795 2.06 -0.247 9
0.605 1.907 -0.013 8
0.568 1.768 0.528 9
0.776 1.802 0.993 8
1.312 1.95 1.174 8
1.916 2.068 1.187 9
1.724 1.861 1.068 6
2.157 1.878 1.09 11
2.435 1.75 1.391 8
2.534 1.401 1.94 8
2.325 0.89 2.305 9
1.799 0.351 2.245 8
1.064 -0.139 1.81 9
0.958 -0.125 1.629 8
0.25 -0.214 1.141 8
0.126 -0.208 0.623 9
0.375 0.049 0.237 8
0.505 1.232 -0.016 8
0.455 1.109 -0.014 7
1.578 2.236 -0.558 10
3.525 2.494 -1.641 9
4.505 2.075 -2.482 8
4.253 1.068 -2.004 8
3.234 -0.341 -0.561 9
1.812 -1.844 0.923 8
0.626 -3.082 1.667 9
0.563 -2.774 1.5 8
-0.295 -3.055 1.055 8
-0.867 -2.681 -0.81 9
-1.334 -2.226 -3.807 8
-2.024 -1.495 -7.115 7
-2.552 -0.817 -9.943 10
-2.711 -0.558 -11.556 8
-2.44 -0.502 -10.401 9
-2.641 -0.547 -10.543 8
-3.012 -0.647 -9.324 9
-3.318 -0.703 -7.14 8
-3.295 -0.622 -4.616 8
-2.7 -0.484 -2.3 9
-1.592 -0.362 -0.355 8
-1.433 -0.326 -0.319 8
-0.198 -0.234 0.976 9
0.824 -0.213 1.443 7
1.404 -0.444 1.252 10
1.449 -0.837 0.717 8
1.09 -1.134 0.062 8
0.981 -1.021 0.055 9
0.473 -1.21 -0.54 8
-0.019 -1.176 -0.733 9
-0.274 -0.849 -0.463 8
-0.051 -0.355 0.019 8
0.623 0.181 0.403 9
1.497 0.653 0.52 8
1.347 0.588 0.468 9
2.006 0.851 0.401 6
2.156 0.883 0.29 10
1.878 0.706 0.128 9
1.354 0.379 -0.033 8
0.586 0.094 0.069 9
-0.337 -0.047 0.316 8
-0.303 -0.043 0.284 8
-1.017 -0.042 0.434 9
-1.226 0.081 0.457 8
-0.928 0.269 0.408 9
-0.352 0.445 0.392 8
0.178 0.456 0.575 8
0.16 0.411 0.518 7
0.368 0.206 0.863 10
0.229 -0.035 1.07 8
-0.19 -0.318 1.155 9
-0.787 -0.719 1.362 8
-1.473 -1.084 1.705 9
-2.145 -1.206 2.064 8
-1.93 -1.085 1.858 8
-2.283 -1.047 2.086 9
-2.025 -0.947 2.095 8
-1.356 -0.754 1.983 9
-0.712 -0.586 1.719 8
-0.36 -0.538 1.403 7
-0.451 -0.546 1.233 10
-0.406 -0.491 1.11 8
-0.818 -0.47 1.05 9
-1.232 -0.401 1.02 8
-1.469 -0.311 1.018 8
-1.307 -0.157 0.978 9
-0.582 0.057 0.864 8
0.511 0.214 0.647 9
0.46 0.193 0.582 8
1.448 0.229 0.345 8
1.872 0.162 0.118 9
1.64 0.038 -0.099 6
0.932 -0.138 -0.228 11
0.208 -0.217 -0.229 8
-0.293 -0.176 -0.123 8
-0.263 -0.158 -0.111 9
-0.562 -0.122 0.117 8
-0.546 -0.145 0.392 8
-0.407 -0.215 0.638 9
-0.333 -0.275 0.803 8
-0.407 -0.401 0.713 9
-0.367 -0.361 0.641 8
-0.897 -0.457 0.418 8
-1.339 -0.274 0.518 7
-1.757 -0.215 0.514 10
-2.043 -0.225 0.494 9
-2.005 -0.044 0.988 8
-1.899 0.035 1.324 8
-1.709 0.031 1.191 9
-1.193 0.028 1.341 8
-0.393 0.017 1.547 9
0.531 0.047 1.871 8
1.168 0.194 2.228 8
1.124 0.483 2.193 9
0.765 0.505 1.777 8
0.688 0.454 1.6 7
0.542 0.162 1.153 10
0.611 -0.085 0.694 8
0.691 -0.318 0.248 9
0.692 -0.464 -0.077 8
0.704 -0.473 -0.394 9
0.722 -0.633 -0.798 8
0.649 -0.569 -0.718 8
0.519 -0.974 -1.067 9
0.255 -1.294 -1.045 8
0.197 -1.363 -0.369 8
0.124 -1.215 0.338 9
0.112 -1.093 0.304 7
-0.24 -0.831 0.039 10
-0.655 -0.567 -0.726 8
-1.034 -0.297 -0.957 8
-1.239 -0.223 -0.7 9
-1.252 -0.324 -0.492 8
-1.154 -0.361 -0.428 9
-0.893 -0.351 -0.323 8
-0.804 -0.315 -0.291 8
-0.365 -0.296 -0.097 9
0.052 -0.261 -0.011 8
0.297 -0.229 -0.007 9
0.416 -0.208 0.07 6
0.426 -0.186 0.199 10
0.328 -0.158 0.29 9
0.295 -0.142 0.261 8
0.146 -0.089 0.253 9
0.007 -0.045 0.218 8
-0.031 -0.027 0.146 8
0.066 0.046 -0.006 9
0.206 0.124 -0.106 8
0.297 0.151 -0.095 8
0.268 0.136 -0.086 9
0.286 0.146 -0.027 8
0.241 0.111 0.071 7
0.148 0.068 0.169 10
0.023 0.083 0.215 8
-0.101 0.08 0.238 9
-0.091 0.072 0.214 8
-0.185 0.052 0.238 9
-0.218 0.067 0.196 8
-0.134 0.02 0.133 8
0.007 -0.073 0.135 9
0.092 -0.143 0.131 8
0.08 -0.188 0.096 9
0.072 -0.169 0.087 8
-0.083 -0.176 0.037 7
-0.277 -0.15 -0.034 10
-0.4 -0.113 -0.168 8
-0.468 -0.053 -0.366 9
-0.457 0.01 -0.536 8
-0.423 0.097 -0.635 8
-0.381 0.087 -0.572 9
-0.331 0.13 -0.497 8
-0.185 0.06 -0.332 9
-0.052 0.048 -0.249 8
-0.008 0.08 -0.147 8
0.008 0.042 -0.017 9
0.008 0.038 -0.015 6
0.015 0.001 0.108 10
0.012 -0.012 0.202 9
0.058 -0.037 0.24 8
0.151 -0.071 0.217 9
0.195 -0.022 0.115 8
0.234 -0.03 0.018 8
0.21 -0.027 0.016 9
0.225 -0.143 -0.147 8
0.072 -0.188 -0.126 9
-0.17 -0.173 0.154 8
-0.316 -0.154 0.286 8
-0.35 -0.147 0.277 7
-0.387 -0.134 0.245 10
-0.348 -0.12 0.22 9
-0.379 -0.095 0.193 8
-0.354 -0.065 0.084 8
-0.303 -0.008 -0.149 9
-0.217 0.095 -0.438 8
-0.12 0.23 -0.656 9
-0.124 0.361 -0.735 8
-0.112 0.325 -0.662 8
-0.211 0.422 -0.685 9
-0.285 0.467 -0.651 8
-0.273 0.46 -0.518 7
-0.155 0.359 -0.29 10
0.008 0.196 0.005 8
0.134 0.064 0.274 9
0.12 0.058 0.246 8
0.25 -0.04 0.375 8
0.414 -0.127 0.359 9
0.518 -0.161 0.245 8
0.535 -0.14 0.135 9
0.453 -0.139 0.141 8
0.408 -0.125 0.127 8
0.202 -0.164 0.225 9
-0.054 -0.214 0.352 7
-0.234 -0.252 0.479 10
-0.288 -0.282 0.558 8
-0.24 -0.293 0.567 8
-0.149 -0.265 0.532 9
-0.134 -0.238 0.478 8
-0.085 -0.185 0.405 9
-0.076 -0.131 0.304 8
-0.112 -0.104 0.232 8
-0.188 -0.086 0.196 9
-0.246 -0.071 0.151 8
-0.276 -0.052 0.092 9
-0.248 -0.047 0.083 6
-0.242 -0.02 0.018 10
-0.169 -0.01 -0.062 9
-0.059 -0.005 -0.139 8
0.018 0.002 -0.187 8
0.044 0.0 -0.188 9
0.028 -0.006 -0.117 8
0.025 -0.005 -0.105 9
-0.036 -0.017 -0.01 8
-0.121 -0.03 0.051 8
-0.203 -0.033 0.076 9
-0.262 -0.027 0.064 8
-0.235 -0.024 0.057 7
-0.25 -0.012 0.027 10
-0.213 -0.004 0.024 8
-0.129 -0.005 -0.102 9
-0.003 -0.002 -0.155 8
0.086 -0.001 -0.139 9
0.058 -0.007 -0.082 8
-0.022 -0.016 -0.052 8
-0.02 -0.014 -0.047 9
-0.072 -0.02 0.015 8
-0.048 -0.023 0.102 9
0.073 -0.028 0.115 8
0.197 -0.026 0.017 7
0.23 -0.007 -0.137 10
0.188 0.024 -0.213 8
0.169 0.021 -0.192 9
0.088 0.05 -0.157 8
0.009 0.071 -0.079 8
-0.013 0.061 0.013 9
-0.031 0.037 0.071 8
-0.12 0.12 0.065 8
-0.158 0.154 0.086 9
-0.142 0.139 0.078 8
-0.073 0.048 0.028 9
0.013 0.006 -0.152 6
0.028 0.079 -0.399 10
-0.001 0.118 -0.387 9
-0.033 0.034 -0.071 8
-0.03 -0.036 0.228 9
-0.027 -0.032 0.206 8
-0.103 -0.066 0.386 8
-0.097 -0.095 0.371 9
-0.068 -0.142 0.276 8
-0.06 -0.176 0.169 9
-0.104 -0.156 0.054 8
-0.094 -0.141 0.048 8
-0.154 -0.073 0.042 7
-0.155 -0.002 0.076 10
-0.094 0.014 0.062 9
-0.037 0.016 0.093 8
-0.013 0.031 0.169 8
-0.02 0.034 0.213 9
-0.018 0.031 0.192 8
-0.134 0.104 0.26 8
-0.332 0.275 0.235 9
-0.422 0.383 0.034 8
-0.413 0.42 -0.109 9
-0.326 0.46 -0.15 8
-0.293 0.414 -0.135 7
-0.056 0.438 -0.147 10
0.242 0.455 -0.062 8
0.412 0.453 0.156 9
0.377 0.406 0.484 8
0.193 0.362 0.908 8
-0.057 0.356 1.19 9
-0.189 0.332 1.125 8
-0.17 0.299 1.012 9
-0.116 0.258 0.684 8
0.038 0.213 0.247 8
0.277 0.155 -0.121 9
# end
#Thu Feb 26 20:33:56 GMT+08:00 20150
