# Supplementary material for: Abnormal Gait Behavior Detection for Elderly Based on Enhanced Wigner-Ville Analysis and Cloud Incremental SVM Learning
Source: Hindawi journal article supplement (doi:10.1155/2016/5869238), 2016-01-01
Supplement: f1 [file 5869238.f1.zip › Supplementary Materials/Original Data/Backward fall Ending sitting/original__86.txt]

# Accelerometer Values
# filename:  original__86.txt
# Saving start time: Thu Feb 26 20:34:00 GMT+08:00 2015

# sensor resolution: 0.0095825195m/s^2
#Sensorvendor: KIONIX, name: KX023 Accelerometer, type: 1,version : 1, range 39.240005

# X value, Y value, Z value, time diff in ms
0.005 0.096 -0.254 9
0.053 0.077 -0.152 8
0.135 0.061 -0.058 9
0.23 0.033 0.007 8
0.29 -0.002 0.029 8
0.291 -0.019 0.024 9
0.205 -0.033 0.011 8
0.184 -0.03 0.01 9
0.046 -0.055 -0.024 8
-0.067 -0.088 -0.075 8
-0.126 -0.098 -0.113 7
-0.123 -0.055 -0.145 10
-0.069 0.002 -0.182 9
-0.003 0.041 -0.208 8
-0.002 0.037 -0.187 8
0.03 0.064 -0.185 9
0.009 0.074 -0.162 8
-0.032 0.051 -0.136 9
0.0 0.027 -0.117 8
0.104 0.032 -0.073 8
0.176 0.018 -0.028 9
0.159 0.016 -0.025 8
0.151 -0.038 0.0 7
0.054 -0.087 0.061 10
-0.051 -0.11 0.108 8
-0.111 -0.108 0.118 9
-0.112 -0.102 0.096 8
-0.1 -0.092 0.087 8
-0.042 -0.104 0.046 9
0.009 -0.1 0.015 8
0.04 -0.043 0.011 9
0.098 0.025 0.017 8
0.204 0.056 -0.007 8
0.317 0.071 -0.021 9
0.285 0.064 -0.019 7
0.316 0.069 0.022 10
0.247 0.058 0.084 8
0.107 0.018 0.145 8
-0.064 -0.048 0.186 9
-0.18 -0.089 0.184 8
-0.186 -0.097 0.155 9
-0.167 -0.087 0.139 8
-0.089 -0.079 0.097 8
0.029 -0.073 0.03 9
0.135 -0.068 -0.057 8
0.21 -0.029 -0.127 9
0.189 -0.026 -0.114 6
0.302 0.049 -0.137 10
0.272 0.044 -0.123 9
0.252 0.065 -0.053 8
0.211 0.035 0.109 9
0.168 -0.032 0.291 8
0.132 -0.098 0.26 8
0.073 -0.098 0.078 9
0.066 -0.088 0.071 8
0.016 -0.026 -0.08 8
0.039 -0.014 -0.168 9
0.131 -0.02 -0.154 8
0.213 0.004 -0.05 7
0.239 0.035 0.117 10
0.258 0.025 0.291 8
0.232 0.022 0.262 9
0.243 -0.036 0.39 8
0.2 -0.085 0.45 9
0.098 -0.094 0.423 8
0.003 -0.071 0.282 8
-0.037 -0.033 0.072 9
-0.053 0.001 -0.108 8
-0.048 0.001 -0.098 9
-0.068 0.052 -0.232 8
-0.083 0.115 -0.306 7
-0.091 0.161 -0.332 10
-0.103 0.179 -0.336 8
-0.109 0.154 -0.311 9
-0.098 0.094 -0.264 8
-0.089 0.085 -0.238 8
-0.078 0.026 -0.163 9
-0.088 -0.022 -0.061 8
-0.11 -0.074 0.029 9
-0.097 -0.131 0.082 8
-0.034 -0.162 0.084 8
-0.03 -0.146 0.075 9
0.024 -0.142 0.063 6
0.04 -0.114 0.078 10
0.018 -0.081 0.114 9
-0.042 -0.055 0.139 8
-0.127 -0.053 0.121 9
-0.2 -0.073 0.077 8
-0.18 -0.065 0.07 8
-0.218 -0.089 0.025 9
-0.203 -0.107 0.006 8
-0.118 -0.115 0.109 9
-0.004 -0.116 0.317 8
0.083 -0.113 0.447 8
0.075 -0.101 0.402 7
0.11 -0.084 0.378 10
0.077 -0.025 0.215 9
0.004 0.067 0.004 8
-0.078 0.119 -0.186 8
-0.161 0.123 -0.337 9
-0.2 0.128 -0.424 8
-0.199 0.116 -0.461 9
-0.179 0.104 -0.415 8
-0.168 0.095 -0.429 8
-0.159 0.101 -0.445 9
-0.179 0.097 -0.442 8
-0.207 0.078 -0.393 7
-0.214 0.031 -0.314 10
-0.192 0.028 -0.283 8
-0.175 -0.032 -0.21 9
-0.15 -0.077 -0.167 8
-0.137 -0.106 -0.143 8
-0.132 -0.121 -0.121 9
-0.127 -0.125 -0.102 8
-0.097 -0.127 -0.093 9
-0.087 -0.114 -0.083 8
-0.002 -0.116 -0.104 8
0.072 -0.114 -0.179 9
0.081 -0.109 -0.315 7
0.035 -0.1 -0.524 10
-0.048 -0.091 -0.742 8
-0.124 -0.083 -0.879 8
-0.111 -0.075 -0.791 9
-0.149 -0.069 -0.833 8
-0.147 -0.068 -0.793 9
-0.089 -0.075 -0.689 8
0.024 -0.117 -0.527 8
0.151 -0.191 -0.364 9
0.136 -0.258 -0.304 8
0.226 -0.232 -0.274 8
0.254 -0.289 -0.332 7
0.23 -0.313 -0.418 10
0.14 -0.314 -0.504 9
0.034 -0.324 -0.549 8
-0.022 -0.351 -0.489 8
-0.02 -0.316 -0.44 9
0.037 -0.399 -0.247 8
0.145 -0.494 -0.127 9
0.255 -0.586 -0.078 8
0.422 -0.686 0.149 8
0.576 -0.786 0.297 9
0.677 -0.907 0.264 8
0.609 -0.816 0.237 7
0.671 -0.902 0.27 10
0.62 -0.99 0.205 8
0.477 -1.083 0.072 9
0.351 -1.066 0.163 8
0.276 -1.008 0.268 9
0.25 -0.964 0.123 8
0.225 -0.868 0.111 8
0.258 -0.825 -0.167 9
0.414 -0.758 -0.406 8
0.628 -0.642 -0.608 9
0.86 -0.403 -0.656 8
0.774 -0.251 -0.493 7
0.713 -0.397 -0.401 10
0.641 -0.357 -0.361 8
0.148 -0.456 -0.426 9
-0.401 -0.428 -0.584 8
-0.881 -0.476 -0.812 8
-1.128 -0.525 -0.941 9
-1.094 -0.479 -0.968 8
-0.984 -0.431 -0.871 8
-0.614 -0.321 -0.784 9
-0.055 -0.224 -1.01 8
0.458 -0.208 -1.374 9
0.743 -0.306 -1.646 6
0.698 -0.424 -1.671 10
0.364 -0.375 -1.524 9
0.327 -0.337 -1.372 8
-0.167 -0.093 -0.953 9
-0.44 0.297 -0.343 8
-0.237 0.61 0.243 8
0.262 0.602 0.657 9
0.748 0.394 0.922 8
1.112 0.251 1.045 9
1.001 0.226 0.941 8
1.252 0.356 0.929 8
1.207 0.616 0.79 7
0.83 0.782 0.438 10
0.388 0.991 0.017 9
0.2 1.254 -0.208 8
0.273 1.38 -0.188 8
0.246 1.242 -0.169 9
0.53 1.456 0.376 8
0.835 1.97 1.55 8
0.854 2.491 2.964 9
0.733 2.592 4.08 8
0.82 2.111 4.508 9
0.981 1.549 4.288 8
0.882 1.394 3.859 7
0.879 1.303 3.385 10
0.787 1.501 2.889 8
0.714 1.697 2.451 9
0.648 1.9 2.216 8
0.586 2.045 2.532 8
0.527 1.841 2.278 9
0.499 1.742 3.102 8
0.467 1.449 3.944 9
0.524 1.161 4.438 8
0.808 0.955 4.44 8
1.097 0.89 4.041 9
0.987 0.801 3.637 6
1.063 0.936 3.055 11
1.086 1.181 2.509 8
1.036 1.375 1.925 8
0.843 1.458 1.212 9
0.693 1.407 0.484 8
0.667 1.241 -0.164 9
0.654 1.057 -0.726 8
0.589 0.952 -0.654 8
0.4 0.707 -1.12 9
0.013 0.271 -1.409 8
-0.383 -0.222 -1.477 8
-0.7 -0.565 -1.297 7
-0.897 -0.66 -0.985 10
-0.844 -0.524 -0.569 9
-0.759 -0.472 -0.512 8
-0.471 0.041 -0.257 8
0.119 1.134 -0.402 9
1.551 1.913 -1.01 8
3.372 1.716 -2.323 9
4.137 0.899 -3.807 8
3.723 0.809 -3.426 8
3.079 -0.682 -4.206 9
1.344 -2.311 -3.991 8
-0.919 -3.069 -2.735 7
-2.808 -3.131 -1.158 10
-3.507 -2.817 -0.144 8
-2.917 -2.18 -0.14 9
-2.625 -1.962 -0.126 8
-1.53 -1.165 -1.247 9
-0.538 -0.169 -2.892 8
0.137 0.75 -4.541 8
0.384 1.26 -5.833 9
-0.017 1.442 -6.386 8
-1.091 1.428 -6.037 8
-0.982 1.285 -5.433 9
-2.23 1.113 -4.532 7
-3.392 1.115 -3.451 10
-4.376 1.47 -2.349 8
-4.557 1.865 -1.463 8
-3.49 1.951 -1.164 9
-1.558 1.718 -1.286 8
-1.402 1.546 -1.157 9
0.559 1.212 -1.068 8
1.881 0.754 -0.658 8
2.26 0.157 -0.297 9
1.774 -0.37 -0.105 8
0.787 -0.597 -0.029 9
0.709 -0.537 -0.026 6
-0.288 -0.33 -0.014 10
-0.827 0.104 -0.093 9
-0.674 0.51 -0.304 8
0.069 0.742 -0.395 9
1.102 0.654 -0.236 8
1.99 0.338 0.164 8
1.791 0.305 0.148 9
2.131 -0.181 0.814 8
1.667 -0.629 1.623 9
0.669 -0.819 2.535 8
-0.37 -0.763 3.278 8
-1.128 -0.561 3.324 7
-1.474 -0.319 2.774 10
-1.327 -0.287 2.497 8
-1.309 -0.083 1.775 9
-0.921 0.011 1.039 8
-0.263 -0.034 0.734 9
0.286 -0.182 1.06 8
0.46 -0.386 1.715 8
0.321 -0.585 2.3 9
0.289 -0.527 2.07 8
0.067 -0.672 2.357 9
-0.098 -0.632 2.286 8
-0.21 -0.475 1.841 7
-0.272 -0.34 1.214 10
-0.376 -0.184 0.628 8
-0.572 -0.082 0.185 9
-0.515 -0.074 0.166 8
-0.738 -0.05 -0.085 8
-0.949 -0.03 -0.245 9
-1.157 -0.038 -0.37 8
-1.396 -0.149 -0.524 9
-1.419 -0.162 -0.583 8
-1.277 -0.146 -0.525 8
-0.899 -0.069 -0.533 9
-0.372 -0.149 -0.789 6
0.09 -0.308 -1.193 11
0.53 -0.363 -1.467 8
0.883 -0.345 -1.56 8
0.928 -0.355 -1.456 9
0.835 -0.319 -1.311 8
0.652 -0.443 -1.203 9
0.462 -0.59 -1.122 8
0.327 -0.588 -0.952 8
0.224 -0.516 -0.838 9
0.095 -0.497 -0.769 8
-0.099 -0.584 -0.647 8
-0.089 -0.525 -0.582 7
-0.325 -0.644 -0.358 10
-0.547 -0.704 -0.096 9
-0.692 -0.71 0.084 8
-0.687 -0.668 0.177 8
-0.537 -0.599 0.263 9
-0.388 -0.518 0.374 8
-0.349 -0.466 0.337 9
-0.317 -0.372 0.478 8
-0.362 -0.268 0.617 8
-0.416 -0.179 0.691 9
-0.444 -0.134 0.688 8
-0.399 -0.121 0.619 7
-0.447 -0.128 0.585 10
-0.402 -0.115 0.526 8
-0.311 -0.105 0.477 9
-0.125 -0.103 0.464 8
0.066 -0.091 0.51 8
0.153 -0.053 0.58 9
0.141 -0.037 0.641 8
0.126 -0.033 0.577 9
0.058 -0.06 0.635 8
-0.042 -0.08 0.644 8
-0.142 -0.065 0.58 9
-0.183 -0.027 0.495 7
-0.154 -0.022 0.455 10
-0.116 -0.089 0.454 8
-0.104 -0.08 0.408 8
-0.077 -0.16 0.446 9
-0.051 -0.195 0.537 8
-0.019 -0.191 0.635 9
0.068 -0.114 0.619 8
0.196 -0.03 0.408 8
0.247 0.025 0.14 9
0.222 0.023 0.126 8
0.102 0.056 -0.172 9
-0.131 0.086 -0.56 6
-0.404 0.039 -0.843 10
-0.542 0.072 -0.769 9
-0.424 0.166 -0.47 8
-0.243 0.018 -0.296 9
-0.218 0.016 -0.266 8
-0.052 -0.17 -0.209 8
0.142 -0.253 -0.062 9
0.342 -0.28 0.196 8
0.497 -0.263 0.417 9
0.623 -0.228 0.502 8
0.561 -0.205 0.452 8
0.647 -0.19 0.407 7
0.651 -0.25 0.425 10
0.502 -0.353 0.465 8
0.161 -0.339 0.388 9
-0.168 -0.242 0.231 8
-0.289 -0.171 0.076 9
-0.26 -0.154 0.068 8
-0.197 -0.074 -0.182 8
-0.059 -0.057 -0.537 9
0.164 -0.19 -0.815 8
0.286 -0.158 -0.85 9
0.12 0.193 -0.669 8
0.108 0.174 -0.602 7
-0.127 0.447 -0.309 10
-0.211 0.315 -0.058 8
-0.184 0.037 0.07 9
-0.188 -0.056 0.17 8
-0.202 -0.056 0.219 8
-0.114 -0.041 0.171 9
0.085 -0.024 0.041 8
0.077 -0.021 0.037 8
0.252 -0.016 -0.099 9
0.227 -0.028 -0.044 8
-0.005 -0.026 0.15 9
-0.244 -0.016 0.255 6
-0.408 -0.004 0.243 10
-0.498 0.029 0.105 9
-0.448 0.026 0.095 8
-0.435 0.065 -0.12 9
-0.382 0.104 -0.312 8
-0.341 0.129 -0.334 8
-0.275 0.138 -0.225 9
-0.153 0.106 -0.16 8
-0.138 0.095 -0.144 9
0.002 0.041 -0.172 8
0.053 0.03 -0.238 8
-0.022 0.047 -0.227 7
-0.145 0.029 -0.064 10
-0.235 -0.008 0.162 9
-0.224 -0.029 0.304 8
-0.202 -0.026 0.274 8
-0.116 -0.035 0.285 9
-0.025 -0.044 0.235 8
0.041 -0.054 0.204 9
0.095 -0.051 0.152 8
0.132 -0.04 0.048 8
0.127 -0.026 -0.055 9
0.114 -0.024 -0.05 8
0.081 0.021 -0.145 7
0.047 0.057 -0.222 10
0.012 0.044 -0.184 8
-0.026 0.011 -0.009 9
-0.035 -0.02 0.193 8
-0.031 -0.038 0.328 8
-0.028 -0.034 0.295 9
0.09 -0.049 0.365 8
0.188 -0.053 0.347 9
0.205 -0.044 0.242 8
0.14 -0.034 0.143 8
0.047 -0.009 0.086 9
0.042 -0.008 0.077 7
-0.055 0.012 0.045 10
-0.144 0.011 0.019 8
-0.177 0.003 -0.001 8
-0.132 0.002 -0.033 9
-0.052 0.01 -0.092 8
0.01 -0.003 -0.099 9
0.009 -0.003 -0.089 8
0.039 -0.028 -0.019 8
0.044 -0.039 0.038 9
0.027 -0.048 0.065 8
-0.022 -0.057 0.079 9
-0.102 -0.06 0.066 6
-0.182 -0.058 0.016 10
-0.164 -0.053 0.014 9
-0.207 -0.042 -0.08 8
-0.179 -0.034 -0.198 9
-0.099 -0.036 -0.263 8
-0.001 -0.056 -0.223 8
0.091 -0.123 -0.099 9
0.082 -0.11 0.059 8
0.117 -0.099 0.053 8
0.102 -0.222 0.213 9
0.087 -0.224 0.284 8
0.063 -0.173 0.238 7
0.02 -0.077 0.161 10
-0.008 0.006 0.09 8
-0.007 0.006 0.081 9
0.009 0.05 0.015 8
0.057 0.071 -0.065 9
0.094 0.083 -0.151 8
0.103 0.093 -0.176 8
0.092 0.089 -0.122 9
0.081 0.08 -0.039 8
0.073 0.072 -0.035 8
0.061 0.063 0.023 9
0.037 0.053 0.042 7
0.01 0.049 0.011 10
-0.022 0.055 -0.043 8
-0.075 0.069 -0.113 8
-0.129 0.075 -0.194 9
-0.116 0.067 -0.175 8
-0.161 0.069 -0.227 9
-0.178 0.065 -0.218 8
-0.168 0.04 -0.139 8
-0.124 0.005 -0.012 9
-0.012 -0.034 0.124 8
0.106 -0.082 0.205 9
0.095 -0.073 0.184 6
0.178 -0.123 0.222 10
0.232 -0.13 0.25 9
0.277 -0.128 0.264 8
0.269 -0.142 0.293 9
0.147 -0.178 0.281 8
0.132 -0.16 0.252 8
0.027 -0.145 0.29 9
-0.067 -0.036 0.291 8
-0.196 0.049 0.125 9
-0.336 0.09 -0.127 8
-0.427 0.165 -0.467 8
-0.384 0.148 -0.42 7
-0.369 0.228 -0.729 10
-0.387 0.274 -0.914 9
-0.408 0.223 -0.822 8
-0.354 0.105 -0.435 8
-0.327 0.011 -0.037 9
-0.375 -0.111 0.258 8
-0.423 -0.195 0.442 8
-0.381 -0.176 0.398 9
-0.407 -0.207 0.549 8
-0.419 -0.307 0.586 9
-0.385 -0.283 0.562 8
-0.399 -0.14 0.51 7
-0.452 -0.08 0.384 10
-0.458 -0.05 0.289 8
-0.412 -0.045 0.26 9
-0.38 -0.007 0.161 8
-0.254 0.034 0.067 8
-0.139 0.057 -0.003 9
-0.133 0.081 -0.041 8
-0.167 0.096 -0.062 9
-0.15 0.087 -0.056 8
-0.196 0.09 -0.097 8
-0.222 0.086 -0.149 9
-0.218 0.073 -0.189 6
-0.194 0.056 -0.225 11
-0.139 0.039 -0.268 8
-0.041 0.017 -0.314 8
-0.037 0.016 -0.282 9
0.025 -0.004 -0.359 8
0.08 -0.066 -0.561 9
0.121 -0.072 -0.743 8
0.106 -0.003 -0.505 8
0.022 -0.112 -0.08 9
-0.281 -0.159 0.26 8
-0.253 -0.143 0.234 8
-0.406 -0.054 0.452 7
-0.249 -0.103 0.429 10
-0.157 -0.114 0.374 9
-0.278 -0.028 0.356 8
-0.504 0.041 0.305 8
-0.636 0.082 0.197 9
-0.572 0.074 0.177 8
-0.5 0.123 -0.007 9
-0.222 0.189 -0.24 8
0.021 0.282 -0.382 8
0.129 0.38 -0.318 9
0.139 0.443 -0.133 8
0.125 0.399 -0.12 7
0.06 0.455 0.034 10
0.019 0.468 0.105 8
0.057 0.457 0.151 9
0.101 0.437 0.215 8
0.129 0.362 0.293 8
0.238 0.22 0.383 9
0.214 0.198 0.345 8
0.421 0.02 0.506 9
# end
#Thu Feb 26 20:34:04 GMT+08:00 2015 
