# Supplementary material for: Abnormal Gait Behavior Detection for Elderly Based on Enhanced Wigner-Ville Analysis and Cloud Incremental SVM Learning
Source: Hindawi journal article supplement (doi:10.1155/2016/5869238), 2016-01-01
Supplement: f1 [file 5869238.f1.zip › Supplementary Materials/Original Data/Backward fall Ending sitting/original__87.txt]

# Accelerometer Values
# filename:  original__87.txt
# Saving start time: Thu Feb 26 20:34:06 GMT+08:00 2015

# sensor resolution: 0.0095825195m/s^2
#Sensorvendor: KIONIX, name: KX023 Accelerometer, type: 1,version : 1, range 39.240005

# X value, Y value, Z value, time diff in ms
0.047 -0.03 -0.13 10
0.212 0.025 -0.197 8
0.319 0.107 -0.206 9
0.287 0.096 -0.185 8
0.239 0.139 -0.174 8
0.107 0.164 -0.122 9
-0.006 0.208 -0.018 8
-0.077 0.214 0.049 9
-0.107 0.172 0.068 8
-0.097 0.155 0.061 8
-0.097 0.102 0.037 9
-0.075 0.062 -0.072 7
-0.047 0.051 -0.192 10
-0.03 0.043 -0.257 8
-0.026 0.046 -0.268 8
-0.027 0.068 -0.252 9
-0.024 0.061 -0.227 8
-0.014 0.085 -0.215 9
0.009 0.099 -0.205 8
0.027 0.088 -0.161 8
0.03 0.056 -0.123 9
0.033 0.045 -0.144 8
0.033 0.097 -0.165 9
0.03 0.087 -0.149 6
0.023 0.133 -0.144 10
0.03 0.091 -0.099 9
0.041 0.027 0.021 8
0.026 0.015 0.188 9
0.015 0.0 0.336 8
0.022 -0.05 0.441 8
0.02 -0.045 0.397 9
0.041 -0.086 0.418 8
0.067 -0.09 0.311 8
0.081 -0.04 0.153 9
0.091 0.013 0.018 8
0.082 0.011 0.016 7
0.088 0.012 -0.089 10
0.061 -0.022 -0.16 8
0.002 -0.04 -0.203 9
-0.044 -0.002 -0.225 8
-0.07 0.042 -0.232 9
-0.084 0.068 -0.227 8
-0.082 0.07 -0.21 8
-0.074 0.063 -0.189 9
-0.061 0.046 -0.163 8
-0.048 0.039 -0.122 9
-0.042 0.034 -0.064 8
-0.038 0.018 -0.013 7
-0.033 -0.001 -0.006 10
-0.021 -0.014 -0.039 8
-0.019 -0.013 -0.035 9
0.006 0.001 -0.068 8
0.046 0.039 -0.079 8
0.11 0.047 -0.07 9
0.166 0.019 -0.033 8
0.145 0.017 0.026 9
0.101 0.033 0.083 8
0.091 0.03 0.074 8
0.121 0.025 0.088 9
0.202 -0.003 0.077 6
0.263 -0.022 0.074 10
0.279 -0.012 0.066 9
0.232 0.0 0.062 8
0.209 0.008 0.076 9
0.122 0.007 0.068 8
0.062 0.01 0.097 8
0.051 0.008 0.115 9
0.106 0.021 0.11 8
0.181 0.043 0.075 9
0.214 0.046 0.027 8
0.193 0.041 0.024 8
0.188 0.037 -0.018 7
0.156 0.033 -0.054 10
0.105 0.027 -0.079 9
0.056 0.017 -0.097 8
0.052 0.012 -0.115 8
0.085 0.016 -0.124 9
0.077 0.014 -0.111 8
0.098 0.006 -0.095 9
0.077 -0.01 -0.052 8
-0.017 -0.028 0.0 8
-0.14 -0.028 0.033 9
-0.183 -0.032 0.042 8
-0.165 -0.029 0.037 7
-0.082 -0.053 0.035 10
0.022 -0.066 0.052 8
0.042 -0.058 0.079 9
0.029 -0.053 0.086 8
0.006 -0.053 0.055 8
-0.026 -0.059 -0.007 9
-0.066 -0.063 -0.068 8
-0.06 -0.057 -0.061 9
-0.121 -0.051 -0.102 8
-0.17 -0.029 -0.121 8
-0.199 -0.011 -0.127 9
-0.212 -0.018 -0.122 7
-0.22 -0.024 -0.106 10
-0.198 -0.022 -0.096 8
-0.206 -0.008 -0.083 8
-0.201 0.005 -0.085 9
-0.174 0.0 -0.112 8
-0.118 -0.003 -0.149 9
-0.056 0.005 -0.179 8
-0.037 0.008 -0.191 8
-0.033 0.007 -0.172 9
-0.065 0.024 -0.171 8
-0.103 0.046 -0.174 9
-0.13 0.045 -0.184 6
-0.165 0.029 -0.18 10
-0.19 0.009 -0.172 9
-0.193 -0.021 -0.121 8
-0.173 -0.019 -0.109 8
-0.142 -0.055 0.01 9
-0.091 -0.108 0.125 8
-0.06 -0.144 0.138 9
-0.063 -0.104 0.035 8
-0.101 -0.04 -0.156 8
-0.161 -0.006 -0.449 9
-0.145 -0.006 -0.404 8
-0.228 0.003 -0.692 7
-0.33 0.011 -0.831 10
-0.37 -0.002 -0.843 8
-0.283 -0.07 -0.799 9
-0.13 -0.139 -0.738 8
-0.117 -0.125 -0.676 9
0.005 -0.163 -0.609 8
0.066 -0.181 -0.561 8
0.084 -0.197 -0.527 9
0.102 -0.245 -0.526 8
0.118 -0.297 -0.569 9
0.137 -0.331 -0.572 8
0.123 -0.298 -0.514 7
0.147 -0.308 -0.65 10
0.26 -0.322 -0.928 8
0.422 -0.352 -1.163 9
0.469 -0.355 -1.426 8
0.428 -0.384 -1.594 8
0.39 -0.505 -1.56 9
0.351 -0.454 -1.404 8
0.339 -0.605 -1.239 8
0.37 -0.716 -0.981 9
0.605 -0.751 -0.662 8
0.933 -0.881 -0.41 9
1.031 -1.23 -0.362 6
0.951 -1.455 -0.403 10
0.856 -1.309 -0.363 9
0.799 -1.321 -0.296 8
0.79 -1.323 -0.162 9
0.779 -1.351 -0.115 8
0.713 -1.386 -0.143 8
0.577 -1.477 -0.2 9
0.376 -1.588 -0.29 8
0.339 -1.429 -0.261 9
0.096 -1.478 -0.403 8
-0.153 -1.436 -0.536 8
-0.353 -1.346 -0.606 7
-0.461 -1.231 -0.656 10
-0.446 -1.107 -0.785 9
-0.402 -0.965 -0.943 8
-0.361 -0.869 -0.849 8
0.028 -0.7 -0.894 9
0.187 -0.463 -0.78 8
0.219 -0.2 -0.572 9
0.156 0.016 -0.374 8
0.019 0.189 -0.23 8
0.017 0.17 -0.207 9
-0.22 0.33 -0.013 8
-0.519 0.647 0.26 7
-0.758 1.163 0.426 10
-0.823 1.671 0.474 8
-0.659 2.108 0.545 9
-0.219 2.45 0.673 8
-0.197 2.205 0.606 8
0.429 2.369 0.878 9
0.911 2.35 1.312 8
1.015 2.198 1.799 9
0.626 2.043 2.208 8
-0.174 2.121 2.384 8
-0.93 2.353 2.29 9
-0.837 2.117 2.061 6
-1.162 2.351 1.833 11
-1.04 2.564 1.738 8
-0.64 2.621 2.074 8
0.044 2.354 2.824 9
0.998 1.882 3.705 8
1.95 1.453 4.519 9
1.755 1.308 4.067 8
2.449 1.012 4.738 8
2.522 0.837 5.017 9
1.973 0.8 4.903 8
1.259 0.828 4.526 8
1.133 0.745 4.073 7
0.592 0.732 3.588 10
0.391 0.687 3.112 9
0.751 0.643 2.709 8
1.635 0.608 2.367 8
2.509 0.534 2.044 9
2.86 0.459 1.709 8
2.626 0.483 1.403 9
2.363 0.435 1.262 8
1.824 0.461 1.02 8
1.207 0.428 0.79 9
0.821 0.313 0.41 8
0.918 0.113 -0.045 7
1.269 -0.098 -0.317 10
1.546 -0.176 -0.32 8
1.392 -0.158 -0.288 9
1.406 0.153 0.135 8
1.041 0.209 0.558 9
0.476 -0.235 0.768 8
-0.155 -0.19 1.203 8
-0.606 0.138 1.625 9
-0.672 0.095 1.693 8
-0.604 0.085 1.523 8
-0.534 -0.01 1.364 9
-0.289 0.268 1.157 7
0.428 0.595 0.758 10
1.277 0.612 -0.154 8
1.584 0.616 -1.431 8
1.281 0.651 -2.633 9
1.153 0.585 -2.37 8
0.536 0.331 -3.32 9
-0.282 -0.061 -3.819 8
-1.166 -0.482 -3.968 8
-1.822 -0.95 -4.202 9
-2.078 -1.213 -4.689 8
-1.87 -1.274 -5.424 9
-1.683 -1.147 -4.881 6
-1.749 -1.116 -5.744 10
-1.607 -0.82 -6.35 9
-1.444 -0.613 -6.584 8
-1.152 -0.731 -6.364 9
-0.874 -0.794 -5.582 8
-0.787 -0.715 -5.024 8
-0.78 -0.67 -4.038 9
-0.958 -0.605 -3.238 8
-1.164 -0.577 -2.796 9
-1.312 -0.632 -2.556 8
-1.378 -0.818 -2.283 8
-1.24 -0.736 -2.055 7
-1.325 -0.984 -1.632 10
-1.503 -1.12 -0.915 9
-1.609 -1.105 -0.009 8
-1.354 -1.037 0.675 8
-0.779 -0.911 1.121 9
-0.12 -0.637 1.532 8
0.534 -0.289 1.811 8
0.48 -0.26 1.63 9
1.147 0.015 1.771 8
1.703 0.223 1.748 9
1.969 0.455 1.494 8
1.928 0.719 1.174 7
1.486 0.959 0.966 10
0.641 1.115 0.857 8
0.577 1.003 0.771 9
-0.353 1.055 0.785 8
-1.017 1.043 0.878 8
-1.332 1.121 0.776 9
-1.41 1.471 0.491 8
-1.021 1.855 0.129 9
-0.036 1.977 -0.245 8
-0.033 1.779 -0.22 8
1.057 1.82 -0.388 9
1.36 1.945 -0.284 6
0.549 1.956 0.077 11
-0.867 1.915 0.814 8
-2.445 2.034 1.804 8
-2.2 1.831 1.624 9
-3.516 1.908 2.615 8
-3.79 1.523 3.502 8
-2.892 0.645 3.971 9
-1.532 -0.135 3.893 8
-0.322 -0.614 3.458 9
0.446 -0.919 2.917 8
0.401 -0.827 2.625 8
0.588 -0.939 2.09 7
0.357 -0.921 1.474 10
0.087 -0.916 0.922 9
-0.007 -0.991 0.38 8
0.128 -1.104 -0.234 8
0.447 -1.109 -0.874 9
0.402 -0.998 -0.786 8
0.795 -0.966 -1.457 9
1.118 -1.012 -1.993 8
1.294 -1.094 -2.259 8
1.187 -1.195 -2.369 9
0.739 -1.235 -2.437 8
0.665 -1.112 -2.193 7
0.091 -1.062 -2.189 10
-0.413 -0.99 -2.077 8
-0.811 -0.919 -1.92 9
-1.103 -0.849 -1.741 8
-1.24 -0.78 -1.542 8
-1.244 -0.723 -1.271 9
-1.152 -0.686 -0.948 8
-1.037 -0.617 -0.853 9
-0.916 -0.557 -0.523 8
-0.81 -0.47 -0.236 8
-0.74 -0.396 0.003 9
-0.684 -0.338 0.306 7
-0.601 -0.298 0.523 10
-0.441 -0.268 0.455 8
-0.397 -0.241 0.41 8
-0.182 -0.21 0.187 9
0.067 -0.18 -0.026 8
0.434 -0.167 -0.144 9
0.726 -0.122 -0.278 8
0.812 -0.049 -0.423 8
0.73 -0.044 -0.38 9
0.625 -0.046 -0.303 8
0.333 -0.089 0.048 9
0.057 -0.114 0.404 6
-0.063 -0.138 0.579 10
0.002 -0.131 0.627 9
0.181 -0.1 0.525 8
0.163 -0.09 0.473 9
0.375 -0.046 0.296 8
0.548 0.013 0.273 8
0.601 0.032 0.431 9
0.56 -0.073 0.458 8
0.429 -0.197 0.707 8
0.169 -0.165 1.231 9
0.152 -0.149 1.108 8
-0.058 -0.109 1.35 7
-0.125 -0.17 1.347 10
-0.088 -0.217 1.193 8
-0.001 -0.214 0.914 9
0.042 -0.168 0.65 8
0.028 -0.081 0.409 9
0.026 -0.073 0.368 8
0.01 -0.023 0.123 8
-0.02 -0.028 -0.063 9
-0.124 -0.039 -0.145 8
-0.335 -0.087 -0.11 9
-0.602 -0.201 0.002 8
-0.542 -0.181 0.002 7
-0.725 -0.295 0.122 10
-0.751 -0.363 0.253 8
-0.592 -0.367 0.351 9
-0.243 -0.342 0.294 8
0.115 -0.296 0.138 8
0.289 -0.209 0.026 9
0.26 -0.188 0.023 8
0.255 -0.083 -0.011 9
0.181 0.007 -0.031 8
0.056 0.083 -0.058 8
-0.079 0.141 -0.048 9
-0.107 0.164 -0.012 6
-0.047 0.161 0.015 10
-0.042 0.145 0.014 9
0.014 0.143 0.049 8
0.085 0.115 0.083 9
0.208 0.068 0.072 8
0.341 0.076 0.012 8
0.429 0.113 -0.068 9
0.45 0.136 -0.136 8
0.405 0.122 -0.123 9
0.346 0.152 -0.165 8
0.212 0.17 -0.157 8
0.048 0.164 -0.033 7
-0.09 0.105 0.127 10
-0.182 -0.025 0.213 9
-0.209 -0.14 0.21 8
-0.188 -0.126 0.189 8
-0.119 -0.187 0.065 9
0.0 -0.179 -0.146 8
0.067 -0.084 -0.348 9
0.048 0.015 -0.412 8
-0.018 0.057 -0.354 8
-0.043 0.066 -0.295 9
-0.038 0.059 -0.266 8
-0.002 0.086 -0.213 7
0.04 0.118 -0.142 10
0.079 0.13 -0.026 8
0.111 0.088 0.075 9
0.1 -0.022 0.131 8
0.002 -0.102 0.22 8
0.001 -0.092 0.198 9
-0.164 -0.113 0.275 8
-0.299 -0.113 0.257 9
-0.359 -0.062 0.14 8
-0.325 0.011 -0.023 8
-0.197 0.074 -0.183 9
-0.177 0.066 -0.165 7
-0.039 0.12 -0.298 10
0.03 0.149 -0.325 8
0.05 0.153 -0.241 8
0.062 0.121 -0.133 9
0.078 0.079 -0.038 8
0.086 0.056 0.028 9
0.077 0.051 0.025 8
0.076 0.028 0.074 8
0.069 0.017 0.128 9
0.064 0.017 0.145 8
0.071 0.022 0.114 9
0.128 0.019 0.055 6
0.25 0.018 -0.032 10
0.225 0.016 -0.028 9
0.307 0.035 -0.116 8
0.277 0.048 -0.177 8
0.187 0.061 -0.241 9
0.093 0.069 -0.31 8
0.061 -0.039 -0.372 9
0.01 -0.084 -0.413 8
0.009 -0.076 -0.372 8
-0.181 0.11 -0.277 9
-0.369 0.204 -0.068 8
-0.396 0.101 0.088 7
-0.306 -0.042 0.19 10
-0.17 -0.15 0.238 8
-0.028 -0.194 0.213 9
-0.025 -0.174 0.191 8
0.089 -0.166 0.129 9
0.163 -0.1 0.053 8
0.177 -0.004 -0.018 8
0.132 0.059 -0.04 9
0.032 0.081 0.008 8
0.029 0.073 0.007 9
-0.127 0.025 0.094 8
-0.317 -0.11 0.197 7
-0.504 -0.25 0.285 10
-0.583 -0.329 0.3 8
-0.492 -0.337 0.24 9
-0.322 -0.307 0.145 8
-0.29 -0.277 0.13 8
-0.119 -0.2 0.059 9
0.022 -0.075 0.023 8
0.094 0.031 0.052 8
0.077 0.091 0.167 9
0.052 0.093 0.231 8
0.047 0.08 0.181 9
0.042 0.072 0.163 6
-0.018 0.124 0.083 10
-0.134 0.192 -0.002 9
-0.202 0.223 -0.073 8
-0.163 0.233 -0.127 9
-0.055 0.24 -0.182 8
0.028 0.239 -0.203 8
0.025 0.215 -0.182 9
0.029 0.202 -0.162 8
-0.047 0.177 -0.115 9
-0.204 0.144 -0.05 8
-0.364 0.112 -0.003 8
-0.328 0.101 -0.003 7
-0.41 0.069 0.013 10
-0.377 0.041 0.012 9
-0.215 0.02 -0.03 8
-0.02 0.007 -0.093 8
0.093 -0.001 -0.129 9
0.123 -0.011 -0.108 8
0.088 -0.033 -0.035 9
0.08 -0.029 -0.032 8
-0.036 -0.075 0.042 8
-0.213 -0.136 0.084 9
-0.367 -0.152 0.085 8
-0.462 -0.137 0.052 7
-0.49 -0.139 -0.025 10
-0.429 -0.156 -0.142 8
-0.386 -0.141 -0.128 9
-0.187 -0.136 -0.247 8
0.104 -0.078 -0.318 8
0.337 -0.009 -0.321 9
0.409 0.052 -0.26 8
0.298 0.102 -0.157 9
0.047 0.128 -0.065 8
0.042 0.115 -0.058 8
-0.208 0.123 -0.021 9
-0.357 0.123 -0.068 6
-0.412 0.12 -0.163 11
-0.384 0.117 -0.241 8
-0.27 0.11 -0.271 8
-0.066 0.1 -0.25 9
-0.059 0.09 -0.225 8
0.121 0.079 -0.143 9
0.196 0.07 -0.001 8
0.165 0.063 0.134 8
0.036 0.056 0.21 9
-0.119 0.052 0.22 8
-0.107 0.047 0.198 8
-0.198 0.044 0.163 7
-0.176 0.033 0.105 10
-0.062 0.014 0.062 9
0.064 -0.006 0.078 8
0.114 -0.024 0.126 8
0.059 -0.054 0.172 9
0.053 -0.048 0.155 8
-0.084 -0.049 0.325 9
-0.215 0.067 0.359 8
-0.223 0.134 0.088 8
-0.189 0.193 -0.146 9
-0.199 0.359 -0.187 8
-0.179 0.323 -0.168 7
-0.213 0.426 -0.023 10
-0.265 0.458 0.214 8
-0.247 0.446 0.454 9
-0.159 0.406 0.602 8
0.0 0.397 0.593 9
0.22 0.401 0.454 8
0.359 0.372 0.306 8
0.323 0.334 0.275 9
0.308 0.3 0.242 8
0.188 0.258 0.339 8
# end
#Thu Feb 26 20:34:10 GMT+08:00 2015-
