# Supplementary material for: Abnormal Gait Behavior Detection for Elderly Based on Enhanced Wigner-Ville Analysis and Cloud Incremental SVM Learning
Source: Hindawi journal article supplement (doi:10.1155/2016/5869238), 2016-01-01
Supplement: f1 [file 5869238.f1.zip › Supplementary Materials/Original Data/Backward fall Ending sitting/original__88.txt]

# Accelerometer Values
# filename:  original__88.txt
# Saving start time: Thu Feb 26 20:34:14 GMT+08:00 2015

# sensor resolution: 0.0095825195m/s^2
#Sensorvendor: KIONIX, name: KX023 Accelerometer, type: 1,version : 1, range 39.240005

# X value, Y value, Z value, time diff in ms
-0.053 -0.129 -0.12 9
-0.005 -0.098 -0.115 8
-0.004 -0.088 -0.103 7
0.113 -0.091 -0.108 10
0.235 -0.086 -0.127 8
0.263 -0.027 -0.116 9
0.201 0.036 -0.064 8
0.145 0.058 -0.014 8
0.126 0.071 0.02 9
0.113 0.064 0.018 8
0.104 0.066 0.05 9
0.088 0.042 0.069 8
0.078 0.001 0.081 8
0.07 -0.033 0.083 9
0.037 -0.066 0.06 7
-0.001 -0.104 0.019 10
-0.001 -0.094 0.017 8
-0.034 -0.101 -0.002 8
-0.06 -0.091 0.0 9
-0.064 -0.099 -0.007 8
-0.05 -0.102 -0.029 9
-0.038 -0.091 -0.047 8
-0.037 -0.078 -0.059 8
-0.033 -0.07 -0.053 9
-0.037 -0.043 -0.068 8
-0.035 -0.015 -0.089 9
-0.034 -0.006 -0.103 6
-0.033 -0.008 -0.107 10
-0.033 -0.005 -0.112 9
-0.03 -0.005 -0.101 8
-0.03 0.007 -0.109 8
-0.028 0.013 -0.116 9
-0.027 -0.015 -0.106 8
-0.03 -0.06 -0.076 9
-0.04 -0.105 -0.037 8
-0.043 -0.142 0.021 8
-0.039 -0.128 0.019 9
-0.032 -0.172 0.087 8
-0.021 -0.216 0.143 7
-0.015 -0.223 0.178 10
-0.014 -0.189 0.163 8
-0.015 -0.116 0.088 9
-0.02 -0.03 -0.015 8
-0.018 -0.027 -0.013 9
-0.034 0.045 -0.118 8
-0.094 0.111 -0.22 8
-0.228 0.146 -0.307 9
-0.392 0.136 -0.349 8
-0.518 0.087 -0.351 9
-0.613 0.033 -0.341 8
-0.552 0.03 -0.306 7
-0.625 -0.008 -0.308 10
-0.632 -0.05 -0.33 8
-0.578 -0.09 -0.354 8
-0.504 -0.137 -0.356 9
-0.461 -0.184 -0.339 8
-0.415 -0.165 -0.305 9
-0.416 -0.193 -0.243 8
-0.398 -0.209 -0.085 8
-0.329 -0.241 -0.007 9
-0.269 -0.29 -0.165 8
-0.25 -0.313 -0.455 9
-0.225 -0.281 -0.409 6
-0.153 -0.356 -0.71 10
-0.103 -0.388 -1.018 9
-0.086 -0.348 -1.174 8
0.026 -0.395 -1.112 9
0.201 -0.503 -0.99 8
0.396 -0.602 -0.885 8
0.535 -0.654 -0.916 9
0.481 -0.589 -0.824 8
0.557 -0.625 -0.937 9
0.777 -0.604 -0.987 8
1.063 -0.715 -1.085 8
1.133 -1.081 -1.304 7
1.062 -1.138 -1.263 10
0.935 -0.985 -0.919 8
0.841 -0.886 -0.827 9
0.723 -1.098 -0.613 8
0.651 -1.573 -0.68 9
0.598 -2.029 -0.889 8
0.521 -2.252 -1.106 8
0.366 -2.159 -1.404 9
0.221 -1.814 -1.76 8
0.199 -1.632 -1.584 9
0.121 -1.315 -1.576 8
0.081 -1.154 -1.419 7
0.08 -1.114 -1.569 10
0.02 -1.052 -1.736 8
-0.124 -0.881 -1.719 9
-0.226 -0.691 -1.463 8
-0.203 -0.622 -1.317 8
-0.237 -0.512 -0.992 9
-0.238 -0.444 -0.635 8
-0.212 -0.331 -0.13 9
-0.191 -0.186 0.462 8
-0.194 0.014 0.977 8
-0.175 0.012 0.879 9
-0.063 0.274 1.369 6
0.227 0.469 1.876 11
0.466 0.533 2.003 8
0.476 0.545 1.618 8
0.316 0.732 1.3 9
-0.03 1.246 1.544 8
-0.027 1.121 1.39 9
-0.543 1.717 1.804 8
-0.932 2.215 1.848 8
-0.829 2.521 1.676 9
-0.274 2.451 1.399 8
0.307 2.241 1.156 8
0.276 2.017 1.041 7
0.736 1.962 1.17 10
1.01 2.151 1.621 9
0.997 2.584 2.326 8
0.904 2.957 3.073 8
1.041 2.965 3.685 9
1.402 2.7 4.066 8
1.935 2.553 4.239 9
1.742 2.297 3.815 8
2.365 2.148 3.9 8
2.662 1.727 3.892 9
2.399 1.388 4.101 8
1.866 1.211 4.451 7
1.662 1.075 4.612 10
2.017 0.993 4.254 8
1.815 0.894 3.829 9
2.375 0.811 2.866 8
2.675 0.737 1.597 9
2.513 0.614 0.448 8
1.939 0.511 -0.048 8
0.97 0.392 0.383 9
0.873 0.352 0.345 8
-0.227 -0.304 1.198 8
-0.941 -1.151 2.136 9
-0.817 -1.421 3.243 7
0.205 -1.161 4.054 10
1.673 -0.741 3.941 8
2.89 0.279 3.318 8
2.601 0.251 2.986 9
3.498 1.451 1.946 8
3.926 1.896 0.101 9
3.317 1.83 -1.674 8
1.73 1.274 -2.756 8
-0.358 0.654 -3.06 9
-2.505 -0.024 -2.709 8
-2.254 -0.021 -2.438 9
-3.6 -0.534 -1.45 6
-2.905 -0.282 -0.035 10
-0.71 0.231 0.595 9
1.503 0.655 0.236 8
3.097 0.689 -0.374 9
3.7 0.161 -1.052 8
3.33 0.145 -0.947 8
2.624 -0.557 -1.876 9
0.887 -1.291 -2.945 8
-1.198 -1.979 -3.899 8
-3.286 -2.443 -4.643 9
-5.06 -2.485 -5.299 8
-4.554 -2.237 -4.769 7
-5.7 -1.776 -5.459 10
-5.72 -1.075 -5.929 8
-4.731 -0.503 -6.16 9
-3.327 -0.101 -6.268 8
-1.957 0.278 -6.134 9
-0.812 0.63 -5.647 8
-0.731 0.567 -5.083 8
0.21 0.833 -4.342 9
1.011 0.907 -3.476 8
1.5 0.715 -2.85 9
1.504 0.284 -2.625 8
1.156 -0.217 -2.513 7
0.548 -0.479 -2.115 10
0.493 -0.431 -1.904 8
-0.295 -0.385 -0.914 9
-1.17 -0.004 0.869 8
-1.825 0.586 2.752 8
-2.048 1.018 3.619 9
-1.922 1.186 3.691 8
-1.59 1.262 3.664 9
-1.431 1.135 3.298 8
-1.09 1.195 2.965 8
-0.532 1.038 2.147 9
0.602 1.067 1.178 6
1.947 1.504 0.314 11
2.894 1.717 -0.36 8
2.98 1.244 -0.751 8
2.682 1.12 -0.676 9
1.587 0.609 -0.475 8
-0.073 0.412 0.333 8
-1.504 0.101 1.224 9
-2.547 -0.13 1.924 8
-3.059 -0.179 2.593 9
-2.753 -0.161 2.333 8
-2.632 -0.249 2.904 8
-1.939 -0.364 3.091 7
-1.029 -0.406 2.898 10
-0.273 -0.375 2.376 9
0.186 -0.359 1.66 8
0.344 -0.453 0.999 8
0.309 -0.407 0.899 9
0.25 -0.622 0.422 8
0.045 -0.892 0.054 9
-0.177 -1.091 -0.238 8
-0.235 -1.215 -0.339 8
-0.024 -1.295 -0.221 9
0.345 -1.259 -0.179 8
0.311 -1.133 -0.161 7
0.687 -1.015 -0.376 10
1.057 -1.011 -0.602 8
1.222 -1.024 -0.764 9
0.994 -0.843 -0.816 8
0.464 -0.693 -0.779 8
-0.197 -0.623 -0.814 9
-0.177 -0.561 -0.733 8
-0.639 -0.479 -0.713 9
-0.832 -0.564 -0.668 8
-1.042 -0.65 -0.787 8
-1.19 -0.589 -0.755 9
-1.071 -0.53 -0.679 7
-1.079 -0.435 -0.493 10
-0.971 -0.391 -0.444 8
-0.554 -0.401 -0.252 8
-0.004 -0.46 -0.077 9
0.449 -0.473 0.021 8
0.712 -0.37 0.115 9
0.827 -0.208 0.208 8
0.745 -0.187 0.187 8
0.827 -0.122 0.17 9
0.903 -0.091 0.07 8
0.883 0.04 -0.075 9
0.748 0.195 -0.252 6
0.575 0.286 -0.37 10
0.398 0.326 -0.43 9
0.358 0.294 -0.387 8
0.219 0.298 -0.427 9
0.165 0.299 -0.401 8
0.177 0.317 -0.33 8
0.221 0.312 -0.258 9
0.333 0.274 -0.107 8
0.411 0.238 0.088 9
0.37 0.214 0.079 8
0.319 0.181 0.232 8
0.209 0.149 0.322 7
0.091 0.118 0.352 10
-0.032 0.081 0.362 8
-0.142 0.05 0.355 9
-0.189 0.023 0.331 8
-0.17 0.02 0.298 9
-0.175 -0.009 0.265 8
-0.156 -0.009 0.199 8
-0.131 0.014 0.113 9
-0.137 0.033 0.04 8
-0.255 0.044 0.012 9
-0.229 0.04 -0.007 8
-0.443 -0.003 -0.007 7
-0.613 -0.193 0.06 10
-0.779 -0.357 0.313 8
-0.856 -0.37 0.516 9
-0.746 -0.366 0.46 8
-0.587 -0.361 0.263 8
-0.528 -0.325 0.237 9
-0.393 -0.305 0.057 8
-0.282 -0.246 -0.063 8
-0.224 -0.145 -0.122 9
-0.239 -0.064 -0.109 8
-0.312 -0.006 -0.067 9
-0.281 -0.005 -0.06 6
-0.355 0.038 -0.056 10
-0.386 0.07 -0.073 9
-0.386 0.082 -0.1 8
-0.365 0.024 -0.111 9
-0.289 -0.061 -0.085 8
-0.158 -0.115 -0.067 8
-0.026 -0.142 -0.067 9
-0.023 -0.128 -0.06 8
0.115 -0.102 -0.086 9
0.228 0.022 -0.14 8
0.229 0.165 -0.186 8
0.14 0.239 -0.185 7
0.02 0.273 -0.155 10
-0.095 0.274 -0.103 9
-0.085 0.246 -0.092 8
-0.114 0.209 -0.028 8
0.0 0.159 0.021 9
0.229 0.129 0.036 8
0.484 0.109 0.044 9
0.616 0.091 0.069 8
0.554 0.082 0.062 8
0.539 0.076 0.067 9
0.425 0.088 0.036 8
0.259 0.099 0.008 7
0.094 0.105 -0.009 10
0.0 0.114 -0.058 8
-0.026 0.111 -0.161 9
-0.023 0.1 -0.145 8
0.0 0.091 -0.274 8
0.088 0.085 -0.375 9
0.174 0.082 -0.456 8
0.272 0.075 -0.455 9
0.381 0.058 -0.264 8
0.42 0.008 -0.019 8
0.378 0.007 -0.017 9
0.317 -0.096 0.178 7
0.152 -0.212 0.35 10
-0.002 -0.37 0.425 8
-0.137 -0.456 0.334 8
-0.316 -0.29 0.171 9
-0.443 -0.096 -0.026 8
-0.398 -0.086 -0.024 9
-0.417 -0.006 -0.33 8
-0.363 0.068 -0.571 8
-0.262 0.134 -0.602 9
-0.125 0.156 -0.534 8
0.062 0.128 -0.414 9
0.056 0.115 -0.373 6
0.267 0.063 -0.244 10
0.395 -0.019 -0.13 9
0.385 -0.152 0.02 8
0.248 -0.26 0.176 8
0.072 -0.314 0.308 9
-0.1 -0.347 0.396 8
-0.09 -0.312 0.356 9
-0.175 -0.301 0.461 8
-0.213 -0.214 0.571 8
-0.292 -0.134 0.59 9
-0.333 -0.104 0.64 8
-0.296 -0.123 0.762 7
-0.18 -0.196 0.793 10
-0.162 -0.176 0.713 8
-0.03 -0.279 0.664 9
0.042 -0.372 0.629 8
0.025 -0.4 0.609 9
-0.078 -0.393 0.565 8
-0.192 -0.343 0.575 8
-0.331 -0.247 0.639 9
-0.298 -0.222 0.575 8
-0.472 -0.176 0.594 9
-0.601 -0.219 0.55 8
-0.678 -0.29 0.464 7
-0.659 -0.315 0.362 10
-0.529 -0.299 0.234 8
-0.297 -0.275 0.157 9
-0.268 -0.247 0.141 8
-0.073 -0.204 0.116 8
-0.019 -0.111 0.041 9
-0.056 0.014 -0.078 8
-0.163 0.124 -0.231 8
-0.326 0.187 -0.384 9
-0.293 0.168 -0.345 8
-0.458 0.189 -0.475 9
-0.553 0.191 -0.555 6
-0.533 0.191 -0.553 10
-0.352 0.18 -0.474 9
-0.087 0.146 -0.351 8
0.133 0.098 -0.215 9
0.12 0.088 -0.193 8
0.26 0.056 -0.069 8
0.305 0.052 0.0 9
0.273 0.047 0.009 8
0.179 0.041 -0.021 9
0.076 0.047 -0.057 8
0.052 0.036 -0.077 8
0.047 0.033 -0.069 7
0.109 0.0 -0.097 10
0.208 -0.034 -0.139 9
0.391 -0.022 -0.155 8
0.6 0.013 -0.153 8
0.646 0.008 -0.139 9
0.53 -0.065 -0.07 8
0.477 -0.059 -0.063 8
0.273 -0.149 0.095 9
0.014 -0.18 0.295 8
-0.215 -0.199 0.397 9
-0.327 -0.228 0.303 8
-0.294 -0.205 0.273 7
-0.272 -0.196 -0.176 10
-0.245 -0.176 -0.158 8
0.005 -0.121 -0.364 9
0.161 -0.054 -0.547 8
0.3 0.01 -0.633 8
0.335 0.034 -0.544 9
0.224 -0.014 -0.345 8
0.201 -0.012 -0.31 9
-0.026 -0.091 -0.021 8
-0.369 -0.15 0.356 8
-0.669 -0.173 0.619 9
-0.754 -0.181 0.725 6
-0.704 -0.156 0.655 11
-0.497 -0.109 0.329 8
-0.448 -0.098 0.296 8
-0.143 -0.054 0.01 9
-0.048 0.13 -0.187 8
-0.048 0.364 -0.404 9
0.045 0.458 -0.526 8
0.061 0.438 -0.395 8
-0.033 0.414 -0.03 9
-0.029 0.372 -0.027 8
-0.096 0.386 0.3 8
-0.095 0.379 0.47 7
-0.146 0.418 0.553 10
-0.217 0.477 0.598 9
-0.159 0.492 0.588 8
0.0 0.478 0.564 8
0.0 0.43 0.508 9
# end
#Thu Feb 26 20:34:18 GMT+08:00 20154
