# Supplementary material for: Abnormal Gait Behavior Detection for Elderly Based on Enhanced Wigner-Ville Analysis and Cloud Incremental SVM Learning
Source: Hindawi journal article supplement (doi:10.1155/2016/5869238), 2016-01-01
Supplement: f1 [file 5869238.f1.zip › Supplementary Materials/Original Data/Backward fall Ending sitting/original__89.txt]

# Accelerometer Values
# filename:  original__89.txt
# Saving start time: Thu Feb 26 20:34:20 GMT+08:00 2015

# sensor resolution: 0.0095825195m/s^2
#Sensorvendor: KIONIX, name: KX023 Accelerometer, type: 1,version : 1, range 39.240005

# X value, Y value, Z value, time diff in ms
0.023 -0.007 -0.14 8
0.108 0.031 -0.21 9
0.111 0.049 -0.228 6
0.075 0.001 -0.166 10
0.033 -0.101 -0.047 9
-0.043 -0.188 0.088 8
-0.174 -0.233 0.196 9
-0.156 -0.21 0.176 8
-0.261 -0.221 0.23 8
-0.29 -0.215 0.215 9
-0.246 -0.2 0.089 8
-0.134 -0.175 -0.128 9
0.0 -0.136 -0.338 8
0.098 -0.101 -0.476 8
0.088 -0.091 -0.428 7
0.117 -0.074 -0.477 10
0.036 -0.065 -0.394 8
-0.13 -0.07 -0.2 9
-0.257 -0.082 0.044 8
-0.266 -0.09 0.25 9
-0.18 -0.098 0.363 8
-0.162 -0.088 0.327 8
-0.043 -0.092 0.367 9
0.055 -0.084 0.316 8
0.145 -0.071 0.178 9
0.24 -0.06 0.0 8
0.216 -0.054 0.0 7
0.283 -0.04 -0.158 10
0.282 -0.015 -0.247 8
0.233 0.005 -0.298 9
0.164 0.005 -0.325 8
0.059 -0.003 -0.289 8
-0.081 -0.011 -0.185 9
-0.194 -0.017 -0.062 8
-0.175 -0.015 -0.056 9
-0.19 -0.018 0.021 8
-0.094 -0.02 0.039 8
0.044 -0.022 0.026 9
0.148 -0.019 -0.003 6
0.21 -0.011 -0.027 10
0.232 0.006 -0.056 9
0.208 0.005 -0.05 8
0.205 0.021 -0.082 9
0.193 0.025 -0.097 8
0.148 0.028 -0.091 8
0.066 0.029 -0.065 9
0.0 0.035 -0.048 8
-0.016 0.034 -0.045 9
-0.014 0.03 -0.041 8
0.022 0.016 -0.041 8
0.073 0.012 -0.026 7
0.107 0.015 0.008 10
0.149 0.012 0.034 9
0.212 0.008 0.061 8
0.19 0.007 0.055 8
0.239 0.014 0.097 9
0.244 0.04 0.173 8
0.209 0.074 0.264 9
0.171 0.099 0.304 8
0.162 0.098 0.26 8
0.173 0.076 0.176 9
0.156 0.069 0.158 8
0.151 0.054 0.087 7
0.129 0.048 0.009 10
0.121 0.03 -0.063 8
0.102 0.017 -0.105 9
0.043 0.046 -0.11 8
-0.026 0.084 -0.092 8
-0.023 0.076 -0.083 9
-0.083 0.095 -0.075 8
-0.136 0.084 -0.062 9
-0.172 0.042 -0.026 8
-0.169 -0.007 0.023 8
-0.113 -0.052 0.049 9
-0.102 -0.046 0.044 7
-0.026 -0.079 0.037 10
0.032 -0.093 0.025 8
0.06 -0.084 0.005 8
0.057 -0.066 -0.04 9
0.024 -0.044 -0.093 8
-0.042 -0.024 -0.152 9
-0.038 -0.022 -0.137 8
-0.118 -0.012 -0.199 8
-0.175 -0.004 -0.246 9
-0.191 0.0 -0.269 8
-0.176 -0.003 -0.258 9
-0.152 -0.007 -0.221 6
-0.118 -0.018 -0.165 10
-0.106 -0.016 -0.148 9
-0.071 -0.025 -0.073 8
-0.035 -0.025 0.008 8
0.001 -0.035 0.065 9
0.036 -0.049 0.097 8
0.063 -0.051 0.109 9
0.073 -0.051 0.081 8
0.066 -0.045 0.073 8
0.041 -0.046 0.033 9
-0.015 -0.049 0.007 8
-0.094 -0.048 0.003 7
-0.159 -0.045 0.032 10
-0.171 -0.042 0.061 8
-0.153 -0.046 0.092 9
-0.138 -0.041 0.083 8
-0.113 -0.045 0.119 9
-0.103 -0.046 0.135 8
-0.124 -0.044 0.1 8
-0.16 -0.036 0.007 9
-0.175 -0.024 -0.105 8
-0.157 -0.021 -0.094 9
-0.156 -0.013 -0.202 8
-0.191 -0.009 -0.28 7
-0.277 -0.007 -0.322 10
-0.357 -0.01 -0.349 8
-0.388 -0.014 -0.375 9
-0.396 -0.024 -0.392 8
-0.356 -0.022 -0.353 8
-0.366 -0.049 -0.352 9
-0.357 -0.096 -0.296 8
-0.313 -0.147 -0.177 8
-0.26 -0.209 -0.082 9
-0.225 -0.23 -0.063 8
-0.216 -0.184 -0.117 9
-0.194 -0.166 -0.105 6
-0.21 -0.12 -0.26 10
-0.274 -0.094 -0.56 9
-0.414 -0.078 -0.874 8
-0.541 -0.092 -1.116 9
-0.578 -0.172 -1.311 8
-0.505 -0.334 -1.397 8
-0.454 -0.3 -1.257 9
-0.257 -0.489 -1.245 8
-0.033 -0.648 -1.142 9
0.173 -0.835 -1.0 8
0.379 -1.034 -0.865 8
0.341 -0.93 -0.779 7
0.489 -1.085 -0.68 10
0.586 -1.189 -0.612 9
0.691 -1.228 -0.763 8
0.728 -1.184 -0.957 8
0.691 -1.103 -1.25 9
0.658 -1.047 -1.486 8
0.636 -0.988 -1.689 9
0.573 -0.89 -1.52 8
0.555 -0.793 -1.715 8
0.53 -0.804 -1.878 9
0.588 -1.019 -1.968 8
0.735 -1.226 -1.904 7
0.798 -1.293 -1.772 10
0.657 -1.228 -1.615 8
0.591 -1.106 -1.453 9
0.341 -0.885 -1.277 8
0.123 -0.621 -1.114 8
-0.001 -0.434 -1.023 9
0.003 -0.283 -0.96 8
0.139 -0.197 -0.89 9
0.417 -0.196 -0.788 8
0.376 -0.176 -0.709 8
0.689 -0.193 -0.491 9
0.909 -0.19 -0.096 7
0.998 -0.209 0.357 10
0.885 -0.27 0.754 8
0.5 -0.185 1.1 8
-0.028 0.043 1.499 9
-0.025 0.038 1.349 8
-0.454 0.239 1.701 9
-0.561 0.57 1.898 8
-0.179 0.995 2.049 8
0.624 1.314 2.087 9
1.547 1.442 2.094 8
1.392 1.298 1.884 9
1.978 1.259 2.011 6
1.788 1.228 2.17 10
0.887 1.296 2.247 9
-0.202 1.395 2.274 8
-1.16 1.493 2.301 8
-1.766 1.603 2.374 9
-1.589 1.442 2.137 8
-1.504 1.504 2.423 9
-0.842 1.432 2.932 8
-0.046 1.295 3.688 8
0.604 1.095 4.588 9
0.827 0.848 5.319 8
0.745 0.763 4.787 7
0.588 0.576 5.188 10
0.345 0.536 5.107 8
0.133 0.644 4.516 9
-0.012 0.821 3.736 8
-0.08 0.961 2.981 9
0.003 1.017 2.417 8
0.373 1.102 2.255 8
0.336 0.992 2.029 9
1.084 1.074 2.106 8
1.985 1.032 2.097 8
2.553 1.059 2.027 9
2.406 0.965 2.007 7
1.701 0.223 1.916 10
0.797 -0.601 2.008 8
0.718 -0.541 1.807 8
-0.054 -0.755 2.237 9
-0.27 -0.756 2.667 8
0.182 -0.853 2.931 9
0.843 -0.96 2.748 8
1.049 -0.899 1.923 8
0.944 -0.809 1.731 9
0.599 -0.422 0.355 8
0.012 0.312 -1.371 9
-0.11 1.101 -3.058 6
0.279 1.528 -4.196 10
0.405 1.632 -4.308 9
0.253 1.555 -3.122 8
0.228 1.399 -2.81 9
0.198 1.039 -0.778 8
0.491 0.345 1.144 8
0.994 -0.339 2.165 9
1.347 -0.829 1.694 8
1.113 -1.03 -0.409 9
0.11 -0.883 -3.329 8
0.099 -0.795 -2.996 8
-1.374 -0.309 -5.662 7
-2.753 0.594 -7.183 10
-3.431 1.537 -7.278 9
-3.032 1.886 -6.422 8
-1.807 1.661 -5.033 8
-0.234 1.224 -3.436 9
-0.21 1.101 -3.092 8
1.232 0.506 -1.961 8
2.106 -0.235 -1.558 9
2.259 -0.973 -1.877 8
1.637 -1.529 -2.702 9
0.355 -1.708 -3.532 8
0.32 -1.537 -3.179 7
-1.046 -1.341 -3.677 10
-1.857 -1.087 -3.78 8
-2.028 -0.861 -3.771 9
-1.727 -0.459 -3.564 8
-1.037 0.065 -3.045 8
-0.143 0.494 -2.319 9
-0.128 0.444 -2.087 8
0.632 0.597 -1.389 9
0.885 0.547 -0.851 8
0.503 0.49 -0.378 8
-0.278 0.462 0.141 9
-1.01 0.461 0.777 6
-1.292 0.483 1.411 11
-1.163 0.435 1.27 8
-0.83 0.45 1.729 8
-0.146 0.532 2.056 9
0.132 0.807 2.395 8
-0.21 1.115 2.848 8
-0.835 1.385 3.434 9
-1.57 1.744 3.823 8
-1.413 1.57 3.441 9
-2.092 1.919 3.374 8
-2.569 2.094 2.961 8
-2.872 2.074 2.368 7
-2.803 1.672 1.773 10
-2.441 0.917 1.31 9
-2.197 0.825 1.179 8
-2.067 0.297 0.914 8
-2.061 0.146 1.035 9
-1.675 0.085 1.254 8
-0.56 -0.059 1.39 9
1.013 -0.29 1.43 8
2.386 -0.517 1.132 8
2.148 -0.465 1.019 9
2.997 -0.71 0.616 8
3.059 -0.94 0.309 7
2.367 -1.103 -0.028 10
1.329 -1.273 -0.376 8
0.334 -1.468 -0.608 9
-0.394 -1.6 -0.823 8
-0.354 -1.44 -0.741 9
-0.686 -1.469 -0.998 8
-0.614 -1.412 -1.265 8
-0.449 -1.309 -1.537 9
-0.372 -1.197 -1.825 8
-0.319 -1.08 -2.024 8
-0.219 -0.975 -2.018 9
-0.197 -0.878 -1.816 7
-0.084 -0.793 -1.551 10
-0.062 -0.707 -1.072 8
-0.047 -0.647 -0.653 8
0.036 -0.613 -0.384 9
0.184 -0.582 -0.237 8
0.165 -0.523 -0.213 9
0.413 -0.501 -0.136 8
0.719 -0.467 -0.138 8
1.019 -0.412 -0.213 9
1.15 -0.345 -0.281 8
1.012 -0.271 -0.337 9
0.911 -0.244 -0.303 6
0.71 -0.229 -0.282 10
0.443 -0.28 -0.097 9
0.081 -0.332 0.233 8
-0.169 -0.408 0.539 9
-0.182 -0.485 0.725 8
0.063 -0.468 0.807 8
0.47 -0.331 0.787 9
0.423 -0.298 0.708 8
0.835 -0.157 0.655 9
1.068 -0.066 0.553 8
0.95 0.016 0.365 8
0.6 0.064 0.206 7
0.208 0.076 0.108 10
-0.119 0.067 0.007 8
-0.107 0.06 0.007 9
-0.278 0.044 -0.1 8
-0.253 0.028 -0.207 9
-0.096 0.017 -0.304 8
0.047 0.016 -0.353 8
0.112 0.01 -0.295 9
0.101 -0.035 -0.08 8
0.091 -0.032 -0.072 9
0.005 -0.117 0.234 8
-0.093 -0.264 0.47 7
-0.155 -0.41 0.761 10
-0.212 -0.474 1.081 8
-0.258 -0.475 1.205 9
-0.232 -0.427 1.084 8
-0.254 -0.363 1.051 8
-0.231 -0.255 0.818 9
-0.177 -0.122 0.433 8
-0.107 0.026 -0.011 9
-0.019 0.14 -0.405 8
-0.006 0.211 -0.64 8
-0.005 0.19 -0.576 9
-0.098 0.218 -0.649 6
-0.261 0.21 -0.465 10
-0.397 0.184 -0.151 9
-0.412 0.164 0.041 8
-0.329 0.165 0.041 9
-0.23 0.17 -0.098 8
-0.207 0.153 -0.088 8
-0.162 0.151 -0.273 9
-0.12 0.138 -0.428 8
-0.069 0.122 -0.416 9
-0.067 0.109 -0.256 8
-0.101 0.079 -0.13 8
-0.091 0.071 -0.117 7
-0.179 0.053 -0.064 10
-0.3 0.057 -0.023 9
-0.373 0.057 -0.022 8
-0.371 0.05 -0.07 8
-0.23 0.046 -0.12 9
0.033 0.053 -0.17 8
0.03 0.048 -0.153 9
0.282 0.049 -0.122 8
0.425 0.032 0.046 8
0.427 -0.024 0.241 9
0.259 -0.098 0.378 8
0.009 -0.169 0.472 7
-0.203 -0.215 0.504 10
-0.183 -0.193 0.454 8
-0.326 -0.166 0.401 9
-0.382 -0.102 0.29 8
-0.336 -0.047 0.129 8
-0.145 0.008 -0.08 9
0.15 0.064 -0.24 8
0.342 0.098 -0.257 9
0.307 0.089 -0.231 8
0.281 0.091 -0.099 8
0.116 0.053 0.077 9
-0.099 0.018 0.192 7
-0.282 0.013 0.235 10
-0.361 0.02 0.195 8
-0.315 -0.008 0.057 8
-0.283 -0.007 0.052 9
-0.188 -0.018 -0.156 8
-0.098 0.05 -0.283 9
0.053 0.098 -0.35 8
0.177 0.1 -0.437 8
0.166 0.095 -0.404 9
0.149 0.084 -0.264 8
0.072 0.075 -0.238 9
-0.006 0.061 -0.091 6
0.0 -0.023 0.033 10
-0.02 -0.06 0.1 9
-0.133 0.014 0.104 8
-0.19 0.053 -0.01 9
-0.171 0.048 -0.009 8
-0.08 0.024 -0.214 8
0.063 0.025 -0.375 9
0.094 0.128 -0.309 8
0.123 0.159 -0.052 8
0.155 0.085 0.073 9
0.079 0.041 0.086 8
0.071 0.037 0.078 7
-0.015 -0.009 0.125 10
-0.067 -0.061 0.064 8
-0.189 -0.021 -0.076 9
-0.328 0.052 -0.161 8
-0.343 0.051 -0.248 9
-0.256 0.021 -0.341 8
-0.23 0.019 -0.307 8
-0.136 0.008 -0.325 9
-0.088 0.009 -0.239 8
-0.07 -0.002 -0.157 9
-0.076 -0.005 -0.09 8
-0.068 -0.005 -0.081 7
-0.265 -0.026 0.024 10
-0.239 -0.023 0.022 8
-0.363 -0.013 0.037 9
-0.48 0.016 0.119 8
-0.377 0.006 0.219 8
-0.138 -0.005 0.243 9
0.107 -0.008 0.303 8
0.096 -0.007 0.273 8
0.25 -0.011 0.361 9
0.221 -0.023 0.468 8
0.043 -0.049 0.575 9
-0.197 -0.108 0.614 6
-0.466 -0.18 0.559 10
-0.668 -0.219 0.451 9
-0.601 -0.197 0.406 8
-0.672 -0.194 0.302 9
-0.596 -0.187 0.206 8
-0.39 -0.193 0.142 8
-0.166 -0.195 0.145 9
-0.027 -0.191 0.186 8
0.034 -0.167 0.22 9
0.031 -0.151 0.198 8
0.052 -0.088 0.185 8
0.014 -0.011 0.131 7
-0.082 0.061 0.031 10
-0.217 0.116 -0.142 9
-0.35 0.145 -0.324 8
-0.398 0.156 -0.43 8
-0.358 0.14 -0.387 9
-0.279 0.138 -0.397 8
-0.108 0.123 -0.332 8
0.088 0.095 -0.225 9
0.285 0.069 -0.104 8
0.398 0.059 -0.009 9
0.361 0.069 0.065 8
0.325 0.062 0.058 7
0.183 0.077 0.123 10
0.018 0.08 0.136 8
-0.118 0.078 0.096 9
-0.177 0.073 0.018 8
-0.129 0.067 -0.101 8
-0.116 0.06 -0.21 9
-0.018 0.053 -0.189 8
0.074 0.045 -0.258 9
0.135 0.035 -0.287 8
0.131 0.025 -0.265 8
0.056 0.022 -0.199 9
0.051 0.019 -0.179 6
-0.057 0.02 -0.08 11
-0.197 0.015 0.016 8
-0.344 0.007 0.076 8
-0.417 0.002 0.059 9
-0.355 0.003 -0.044 8
-0.164 0.007 -0.172 9
0.075 0.015 -0.295 8
0.068 0.013 -0.265 8
0.259 0.018 -0.35 9
0.285 0.019 -0.327 8
0.073 0.011 -0.088 8
-0.234 0.015 0.191 7
-0.406 0.016 0.274 10
-0.405 0.011 0.21 9
-0.364 0.01 0.189 8
-0.186 0.018 0.028 8
0.083 0.027 -0.081 9
0.285 0.034 0.047 8
0.416 0.036 0.255 9
0.5 0.046 0.357 8
0.487 0.064 0.397 8
0.438 0.058 0.357 9
0.249 0.077 0.359 8
-0.1 0.109 0.309 7
-0.394 0.142 0.175 10
-0.526 0.175 0.027 8
-0.549 0.196 -0.081 9
# end
#Thu Feb 26 20:34:24 GMT+08:00 20155
