# Supplementary material for: Abnormal Gait Behavior Detection for Elderly Based on Enhanced Wigner-Ville Analysis and Cloud Incremental SVM Learning
Source: Hindawi journal article supplement (doi:10.1155/2016/5869238), 2016-01-01
Supplement: f1 [file 5869238.f1.zip › Supplementary Materials/Original Data/Backward fall Ending sitting/original__90.txt]

# Accelerometer Values
# filename:  original__90.txt
# Saving start time: Thu Feb 26 20:34:27 GMT+08:00 2015

# sensor resolution: 0.0095825195m/s^2
#Sensorvendor: KIONIX, name: KX023 Accelerometer, type: 1,version : 1, range 39.240005

# X value, Y value, Z value, time diff in ms
0.04 -0.171 0.164 9
0.037 -0.112 0.023 8
-0.071 -0.034 -0.086 7
-0.181 0.027 -0.157 10
-0.225 0.047 -0.201 8
-0.206 0.053 -0.196 8
-0.145 0.043 -0.131 9
-0.131 0.039 -0.118 8
-0.047 -0.004 -0.043 9
0.037 -0.046 0.007 8
0.079 -0.058 0.033 8
0.054 -0.042 0.044 9
0.009 -0.003 0.029 8
-0.019 0.019 0.011 9
-0.017 0.017 0.009 6
-0.072 0.029 0.041 10
-0.144 0.045 0.108 9
-0.163 0.037 0.162 8
-0.105 0.028 0.165 9
-0.007 0.044 0.129 8
0.083 0.066 0.106 8
0.075 0.059 0.096 9
0.159 0.063 0.101 8
0.224 0.041 0.103 9
0.246 0.02 0.093 8
0.217 0.022 0.082 8
0.152 0.038 0.072 7
0.089 0.033 0.058 10
0.08 0.03 0.052 8
0.043 0.003 0.022 9
0.03 -0.005 0.001 8
0.045 0.01 0.012 9
0.096 0.04 0.013 8
0.191 0.049 0.0 8
0.309 0.039 -0.001 9
0.278 0.035 -0.001 8
0.344 0.035 0.003 9
0.333 0.045 -0.001 8
0.292 0.029 -0.042 7
0.205 -0.022 -0.088 10
0.068 -0.07 -0.106 8
-0.033 -0.108 -0.072 9
-0.029 -0.097 -0.065 8
-0.071 -0.144 0.006 8
-0.094 -0.184 0.078 9
-0.118 -0.172 0.135 8
-0.099 -0.129 0.16 9
-0.047 -0.089 0.147 8
-0.043 -0.08 0.132 8
-0.023 -0.04 0.085 9
-0.048 -0.004 -0.011 6
-0.13 0.037 -0.135 11
-0.235 0.072 -0.24 8
-0.295 0.071 -0.287 8
-0.3 0.047 -0.262 9
-0.27 0.042 -0.235 8
-0.26 0.02 -0.142 8
-0.251 -0.007 -0.01 9
-0.226 -0.025 0.086 8
-0.168 -0.027 0.12 9
-0.1 -0.045 0.11 8
-0.043 -0.061 0.069 8
-0.039 -0.055 0.062 7
0.061 -0.043 0.029 10
0.181 -0.031 0.036 9
0.231 -0.044 0.071 8
0.213 -0.065 0.119 8
0.158 -0.095 0.15 9
0.041 -0.115 0.16 8
0.037 -0.103 0.144 9
-0.106 -0.101 0.141 8
-0.189 -0.102 0.129 8
-0.201 -0.098 0.119 9
-0.155 -0.082 0.114 8
-0.033 -0.057 0.108 7
0.108 -0.026 0.094 10
0.098 -0.023 0.084 8
0.209 0.001 0.059 9
0.292 0.028 0.02 8
0.306 0.065 -0.013 8
0.251 0.089 -0.03 9
0.181 0.087 -0.043 8
0.113 0.067 -0.06 9
0.102 0.06 -0.054 8
0.04 0.042 -0.071 8
0.014 0.032 -0.089 9
0.037 0.031 -0.096 7
0.099 0.026 -0.07 10
0.189 0.023 -0.014 8
0.17 0.02 -0.012 8
0.246 0.013 0.041 9
0.28 0.013 0.071 8
0.293 0.012 0.078 9
0.256 -0.003 0.072 8
0.151 -0.01 0.063 8
0.025 -0.015 0.046 9
0.022 -0.013 0.041 8
-0.067 -0.012 0.022 9
-0.099 -0.01 -0.001 6
-0.08 -0.013 -0.016 10
-0.04 -0.004 -0.024 9
0.009 0.0 -0.035 8
0.056 0.0 -0.051 9
0.051 0.0 -0.046 8
0.053 0.003 -0.058 8
0.012 0.021 -0.088 9
-0.04 0.047 -0.15 8
-0.091 0.06 -0.199 8
-0.138 0.067 -0.209 9
-0.169 0.061 -0.185 8
-0.152 0.055 -0.167 7
-0.137 0.026 -0.113 10
-0.089 -0.006 -0.033 8
-0.053 -0.018 0.049 9
-0.032 -0.02 0.109 8
-0.029 -0.016 0.139 9
-0.043 -0.004 0.142 8
-0.039 -0.004 0.128 8
-0.063 -0.003 0.107 9
-0.084 -0.007 0.06 8
-0.098 -0.036 0.008 9
-0.16 -0.096 -0.015 8
-0.144 -0.159 -0.004 7
-0.329 -0.225 0.026 10
-0.296 -0.203 0.023 8
-0.277 -0.246 0.049 9
-0.244 -0.252 0.072 8
-0.236 -0.259 0.091 8
-0.238 -0.274 0.093 9
-0.235 -0.281 0.073 8
-0.232 -0.278 0.01 8
-0.208 -0.25 0.009 9
-0.207 -0.225 -0.11 8
-0.201 -0.155 -0.266 9
-0.189 -0.076 -0.41 6
-0.148 -0.032 -0.514 10
-0.102 0.001 -0.556 9
-0.092 0.001 -0.5 8
-0.079 0.014 -0.45 9
-0.095 -0.007 -0.389 8
-0.122 -0.042 -0.269 8
-0.168 -0.08 -0.167 9
-0.235 -0.101 -0.129 8
-0.28 -0.106 -0.147 9
-0.252 -0.095 -0.132 8
-0.242 -0.103 -0.159 8
-0.178 -0.093 -0.125 7
-0.091 -0.065 -0.041 10
-0.013 -0.045 -0.036 9
0.036 -0.022 -0.142 8
0.041 0.039 -0.295 8
0.036 0.035 -0.265 9
0.0 0.113 -0.406 8
-0.07 0.134 -0.489 9
-0.191 0.095 -0.522 8
-0.315 0.034 -0.487 8
-0.378 -0.01 -0.389 9
-0.348 -0.038 -0.297 8
-0.313 -0.034 -0.267 7
-0.161 -0.068 -0.23 10
0.045 -0.101 -0.287 8
0.261 -0.103 -0.44 9
0.443 -0.096 -0.64 8
0.478 -0.127 -0.786 8
0.373 -0.194 -0.785 9
0.336 -0.175 -0.707 8
0.226 -0.327 -0.573 9
0.143 -0.486 -0.455 8
0.146 -0.56 -0.286 8
0.374 -0.595 0.049 9
0.336 -0.599 0.278 7
1.103 -0.613 0.288 10
0.993 -0.552 0.259 8
1.283 -0.566 0.079 8
1.402 -0.535 -0.303 9
1.411 -0.536 -0.754 8
1.348 -0.612 -1.182 9
1.22 -0.688 -1.431 8
1.059 -0.795 -1.384 8
0.953 -0.716 -1.245 9
0.748 -1.009 -1.104 8
0.43 -1.3 -1.051 9
0.053 -1.386 -1.079 6
-0.307 -1.326 -1.099 10
-0.597 -1.184 -1.162 9
-0.538 -1.065 -1.046 8
-0.609 -0.879 -1.188 8
-0.435 -0.649 -1.305 9
-0.162 -0.457 -1.286 8
0.128 -0.37 -1.102 9
0.32 -0.342 -0.948 8
0.309 -0.287 -0.976 8
0.278 -0.258 -0.878 9
0.085 -0.119 -1.099 8
-0.185 0.085 -1.418 7
-0.391 0.25 -1.647 10
-0.461 0.324 -1.696 8
-0.407 0.354 -1.619 9
-0.28 0.463 -1.382 8
-0.252 0.416 -1.244 9
-0.183 0.695 -0.86 8
-0.245 1.077 -0.389 8
-0.348 1.497 0.147 9
-0.314 1.874 0.575 8
-0.069 2.134 0.705 8
0.354 2.294 0.525 9
0.318 2.065 0.473 7
0.705 2.154 0.08 10
0.789 2.188 -0.347 8
0.536 2.257 -0.489 9
0.067 2.298 -0.205 8
-0.434 2.239 0.235 8
-0.749 2.141 0.767 9
-0.674 1.927 0.691 8
-0.598 1.867 1.467 8
-0.198 1.823 2.368 9
0.417 1.838 3.123 8
1.167 1.878 3.491 9
1.05 1.69 3.142 6
2.38 1.678 4.028 10
2.142 1.51 3.625 9
2.046 1.251 4.328 8
1.546 0.938 5.092 9
1.039 0.665 5.564 8
0.758 0.45 5.47 8
0.747 0.288 4.973 9
0.672 0.259 4.475 8
1.029 0.127 3.983 9
1.656 -0.094 3.672 8
2.197 -0.22 3.591 8
2.371 -0.15 3.623 7
2.262 -0.528 3.318 10
2.009 -1.279 2.433 9
1.808 -1.151 2.189 8
1.261 -1.607 0.966 8
0.451 -1.515 -0.223 9
-0.358 -1.183 -1.004 8
-0.93 -1.006 -1.183 8
-1.08 -0.781 -0.44 9
-0.753 -0.336 1.074 8
-0.677 -0.302 0.967 9
0.119 0.38 2.454 8
1.28 1.509 3.33 7
2.76 2.793 3.328 10
4.287 3.208 1.879 8
4.856 2.581 -0.831 9
3.832 1.372 -3.108 8
3.449 1.235 -2.797 8
1.073 0.305 -3.555 9
-1.723 -0.016 -2.978 8
-4.079 -0.106 -1.874 9
-5.241 0.18 -0.803 8
-4.178 0.219 -0.238 8
-1.899 0.023 -0.798 9
-1.709 0.021 -0.718 6
0.112 0.075 -2.011 11
1.218 -0.156 -3.32 8
1.26 -0.634 -4.306 8
0.102 -0.667 -4.468 9
-1.463 -0.466 -3.652 8
-2.849 -0.297 -2.659 8
-2.564 -0.268 -2.393 9
-3.607 0.161 -1.723 8
-3.545 0.548 -0.995 9
-2.268 0.491 -0.533 8
-0.677 0.233 -0.849 8
-0.609 0.209 -0.764 7
0.742 -0.051 -2.008 10
1.654 -0.487 -1.807 9
1.772 -0.912 -1.757 8
1.058 -0.922 -1.556 8
0.177 -0.626 -1.088 9
-0.383 -0.297 -0.496 8
-0.597 0.016 -0.14 9
-0.537 0.014 -0.126 8
-0.422 0.197 -0.003 8
-0.029 0.076 -0.012 9
0.452 -0.295 -0.125 8
0.971 -0.54 -0.27 7
1.309 -0.614 -0.454 10
1.132 -0.692 -0.659 8
1.019 -0.622 -0.593 9
0.517 -0.513 -0.496 8
-0.092 -0.068 -0.143 9
-0.588 0.425 0.16 8
-0.789 0.779 0.308 8
-0.767 0.957 0.339 9
-0.613 0.95 0.332 8
-0.551 0.855 0.299 8
-0.274 0.767 0.087 9
0.124 0.659 -0.343 7
0.461 0.594 -0.773 10
0.512 0.488 -1.23 8
0.299 0.504 -1.563 8
-0.234 0.721 -1.529 9
-0.211 0.649 -1.376 8
-1.052 0.781 -1.081 9
-1.939 0.871 -0.517 8
-2.643 1.127 0.224 8
-2.846 1.313 0.919 9
-2.285 0.98 1.248 8
-1.409 0.346 1.119 9
-1.268 0.311 1.007 6
-0.533 -0.162 0.814 10
0.035 -0.544 0.565 9
0.362 -0.992 0.238 8
0.483 -1.33 0.112 9
0.304 -1.508 0.178 8
0.274 -1.672 0.33 8
-0.071 -1.505 0.297 9
-0.339 -1.647 0.538 8
-0.437 -1.684 0.783 9
-0.271 -1.548 0.808 8
0.116 -1.277 0.538 8
0.104 -1.149 0.484 7
0.526 -0.84 0.069 10
0.779 -0.547 -0.42 8
0.745 -0.351 -0.817 9
0.53 -0.235 -1.077 8
0.162 -0.159 -1.407 9
-0.268 -0.103 -1.662 8
-0.614 -0.072 -1.695 8
-0.552 -0.065 -1.526 9
-0.881 -0.08 -1.431 8
-1.128 -0.139 -1.16 9
-1.197 -0.282 -0.889 8
-1.085 -0.445 -0.398 7
-0.788 -0.42 0.277 10
-0.313 -0.249 0.581 8
-0.282 -0.224 0.523 9
0.229 -0.1 0.538 8
0.576 -0.026 0.553 8
0.661 0.029 0.655 9
0.541 0.027 0.758 8
0.327 -0.084 0.938 9
0.111 -0.261 1.215 8
0.1 -0.234 1.093 8
-0.052 -0.402 1.305 9
-0.17 -0.506 1.327 6
-0.293 -0.524 1.098 10
-0.362 -0.487 0.715 9
-0.353 -0.385 0.395 8
-0.282 -0.245 0.2 9
-0.254 -0.221 0.18 8
-0.078 -0.145 0.13 8
0.152 -0.1 0.288 9
0.359 -0.062 0.522 8
0.524 -0.127 0.693 9
0.518 -0.229 0.803 8
0.466 -0.206 0.723 8
0.251 -0.283 0.789 7
-0.047 -0.345 0.794 10
-0.345 -0.378 0.707 9
-0.592 -0.385 0.546 8
-0.67 -0.373 0.356 8
-0.561 -0.342 0.126 9
-0.505 -0.308 0.113 8
-0.307 -0.269 -0.146 9
-0.119 -0.244 -0.244 8
-0.028 -0.216 -0.123 8
-0.035 -0.194 0.041 9
-0.134 -0.181 0.191 8
-0.12 -0.163 0.172 7
-0.281 -0.142 0.267 10
-0.454 -0.121 0.306 8
-0.599 -0.104 0.307 9
-0.658 -0.101 0.185 8
-0.573 -0.066 -0.114 8
-0.342 0.064 -0.456 9
-0.052 0.293 -0.718 8
-0.047 0.263 -0.646 9
0.149 0.505 -0.841 8
0.152 0.649 -0.861 8
0.005 0.66 -0.669 9
-0.198 0.552 -0.418 7
-0.303 0.325 -0.179 10
-0.303 0.154 -0.05 8
-0.273 0.139 -0.045 8
-0.265 0.181 -0.008 9
-0.173 0.177 0.051 8
-0.001 0.037 -0.013 9
0.194 -0.119 -0.241 8
0.271 -0.031 -0.529 8
0.141 0.276 -0.725 9
0.127 0.248 -0.652 8
-0.047 0.424 -0.636 9
-0.119 0.444 -0.576 6
-0.136 0.369 -0.524 10
-0.171 0.232 -0.383 9
-0.137 0.062 -0.189 8
-0.123 0.056 -0.17 8
0.023 -0.076 -0.01 9
0.241 -0.155 0.063 8
0.478 -0.19 0.03 9
0.661 -0.183 -0.002 8
0.686 -0.143 0.104 8
0.548 -0.125 0.271 9
0.493 -0.112 0.244 8
0.27 -0.14 0.367 7
0.012 -0.186 0.515 10
-0.19 -0.215 0.599 8
-0.272 -0.204 0.515 9
-0.265 -0.15 0.358 8
-0.189 -0.081 0.172 9
-0.17 -0.073 0.155 8
-0.027 -0.033 -0.014 8
0.122 -0.011 -0.077 9
0.21 -0.001 -0.008 8
0.225 -0.035 0.146 9
0.19 -0.103 0.37 8
0.171 -0.092 0.333 7
0.102 -0.168 0.548 10
0.024 -0.17 0.651 8
-0.023 -0.146 0.658 8
-0.042 -0.153 0.592 9
-0.058 -0.108 0.429 8
-0.063 -0.032 0.197 9
-0.016 0.037 -0.039 8
-0.014 0.033 -0.035 8
0.058 0.063 -0.186 9
0.073 0.061 -0.167 8
0.006 0.033 -0.06 9
-0.09 -0.031 0.022 6
-0.161 -0.066 0.076 10
-0.145 -0.059 0.068 9
-0.16 -0.05 0.045 8
-0.107 -0.028 -0.054 9
-0.017 0.006 -0.164 8
0.064 0.028 -0.236 8
0.115 0.039 -0.207 9
0.136 0.042 -0.055 8
0.122 0.038 -0.049 9
0.114 0.01 0.15 8
0.079 -0.035 0.28 8
0.0 -0.073 0.323 7
-0.12 -0.075 0.29 10
-0.219 -0.043 0.164 9
-0.258 -0.005 -0.016 8
-0.232 -0.004 -0.015 8
-0.195 0.021 -0.167 9
-0.088 0.035 -0.256 8
0.017 0.037 -0.282 9
0.087 0.032 -0.27 8
0.125 0.044 -0.265 8
0.118 0.081 -0.281 9
0.106 0.073 -0.253 8
0.041 0.099 -0.274 7
-0.056 0.098 -0.286 10
-0.138 0.083 -0.287 8
-0.185 0.066 -0.27 9
-0.195 0.043 -0.232 8
-0.152 0.017 -0.195 8
-0.137 0.015 -0.175 9
-0.024 0.003 -0.152 8
0.096 0.004 -0.113 9
0.163 0.012 -0.036 8
0.178 0.016 0.06 8
0.161 0.014 0.154 9
0.145 0.013 0.139 6
0.101 0.003 0.229 11
0.03 -0.01 0.299 8
-0.058 -0.025 0.282 8
-0.114 -0.029 0.17 9
-0.089 -0.007 0.021 8
0.005 0.029 -0.109 9
0.005 0.026 -0.098 8
0.117 0.043 -0.161 8
0.193 0.039 -0.135 9
0.21 0.034 -0.045 8
0.16 0.028 0.056 8
0.05 0.019 0.124 7
-0.093 0.004 0.122 10
-0.083 0.004 0.109 9
-0.186 0.001 0.052 8
-0.163 0.005 -0.04 8
-0.072 -0.006 -0.073 9
-0.012 0.016 -0.052 8
0.055 0.054 -0.069 9
0.133 0.078 -0.131 8
0.12 0.07 -0.118 8
0.148 0.105 -0.193 9
0.148 0.141 -0.243 8
0.143 0.163 -0.274 7
0.126 0.186 -0.261 10
0.069 0.166 -0.18 8
-0.058 0.074 -0.003 9
-0.052 0.066 -0.002 8
-0.229 -0.042 0.263 9
-0.399 -0.157 0.501 8
-0.495 -0.254 0.599 8
-0.472 -0.281 0.503 9
-0.33 -0.246 0.225 8
-0.297 -0.221 0.202 8
-0.1 -0.146 -0.089 9
0.049 -0.053 -0.303 7
# end
#Thu Feb 26 20:34:31 GMT+08:00 2015 
