# Supplementary material for: Abnormal Gait Behavior Detection for Elderly Based on Enhanced Wigner-Ville Analysis and Cloud Incremental SVM Learning
Source: Hindawi journal article supplement (doi:10.1155/2016/5869238), 2016-01-01
Supplement: f1 [file 5869238.f1.zip › Supplementary Materials/Original Data/Backward fall With recovery/original__102.txt]

# Accelerometer Values
# filename:  original__102.txt
# Saving start time: Thu Feb 26 20:36:51 GMT+08:00 2015

# sensor resolution: 0.0095825195m/s^2
#Sensorvendor: KIONIX, name: KX023 Accelerometer, type: 1,version : 1, range 39.240005

# X value, Y value, Z value, time diff in ms
0.092 -0.023 -0.082 8
0.176 0.019 -0.116 9
0.158 0.017 -0.104 8
0.195 0.033 -0.108 9
0.177 0.035 -0.071 6
0.134 0.024 -0.01 10
0.071 0.004 0.038 9
0.009 -0.029 0.054 8
-0.025 -0.063 0.034 9
-0.023 -0.057 0.031 8
-0.023 -0.061 0.012 8
0.028 -0.049 0.0 9
0.094 -0.049 -0.011 8
0.129 -0.047 0.0 9
0.119 -0.03 0.025 8
0.084 -0.025 0.052 8
0.075 -0.023 0.047 7
0.045 -0.031 0.069 10
0.029 -0.047 0.075 8
0.027 -0.065 0.05 9
0.028 -0.075 0.005 8
0.035 -0.083 -0.031 9
0.032 -0.075 -0.028 8
0.05 -0.081 -0.054 8
0.065 -0.088 -0.063 9
0.1 -0.093 -0.055 8
0.149 -0.083 -0.03 9
0.153 -0.063 0.018 8
0.138 -0.056 0.016 7
0.112 -0.066 0.081 10
0.106 -0.082 0.145 8
0.132 -0.073 0.187 9
0.16 -0.072 0.195 8
0.143 -0.054 0.165 8
0.095 -0.002 0.104 9
0.059 0.033 0.029 8
0.053 0.03 0.026 9
0.05 0.065 -0.044 8
0.048 0.101 -0.101 8
0.019 0.102 -0.128 9
-0.018 0.08 -0.126 6
-0.042 0.056 -0.097 10
-0.014 0.052 -0.041 9
-0.013 0.046 -0.037 8
0.06 0.044 0.037 9
0.124 0.022 0.107 8
0.125 -0.01 0.171 8
0.089 -0.047 0.223 9
0.078 -0.076 0.244 8
0.07 -0.068 0.219 9
0.106 -0.104 0.226 8
0.145 -0.135 0.237 8
0.137 -0.162 0.25 7
0.062 -0.204 0.26 10
-0.049 -0.237 0.26 9
-0.126 -0.249 0.229 8
-0.113 -0.224 0.206 8
-0.145 -0.228 0.14 9
-0.178 -0.215 0.076 8
-0.258 -0.189 0.035 9
-0.35 -0.17 -0.002 8
-0.376 -0.151 -0.061 8
-0.344 -0.11 -0.14 9
-0.309 -0.099 -0.126 8
-0.246 -0.038 -0.199 7
-0.218 0.02 -0.24 10
-0.247 0.052 -0.245 8
-0.281 0.063 -0.229 9
-0.31 0.06 -0.175 8
-0.326 0.041 -0.086 8
-0.293 0.037 -0.077 9
-0.293 0.038 0.032 8
-0.28 0.076 0.136 9
-0.256 0.097 0.166 8
-0.228 0.091 0.095 8
-0.211 0.109 -0.036 9
-0.19 0.098 -0.033 7
-0.179 0.138 -0.177 10
-0.164 0.155 -0.31 8
-0.15 0.124 -0.45 8
-0.196 0.048 -0.604 9
-0.369 -0.027 -0.679 8
-0.587 -0.113 -0.631 9
-0.528 -0.101 -0.568 8
-0.651 -0.185 -0.497 8
-0.666 -0.228 -0.437 9
-0.618 -0.236 -0.392 8
-0.486 -0.223 -0.466 9
-0.219 -0.207 -0.662 6
0.137 -0.169 -0.767 10
0.123 -0.152 -0.69 9
0.355 -0.023 -0.693 8
0.487 0.0 -0.709 9
0.537 -0.07 -0.712 8
0.399 -0.032 -0.723 8
0.419 -0.471 -0.76 9
0.625 -0.935 -0.855 8
0.562 -0.841 -0.769 8
0.684 -0.593 -0.939 9
0.744 -0.227 -0.988 8
0.78 -0.183 -0.854 7
0.77 -0.378 -0.6 10
0.717 -0.58 -0.286 8
0.678 -0.718 -0.042 9
0.61 -0.646 -0.038 8
0.628 -0.78 0.069 9
0.744 -0.978 0.045 8
0.928 -1.215 -0.166 8
1.019 -1.536 -0.504 9
0.885 -2.002 -0.909 8
0.796 -1.802 -0.818 9
0.426 -2.204 -1.244 8
-0.116 -2.157 -1.444 7
-0.561 -1.74 -1.44 10
-0.644 -1.303 -1.48 8
-0.479 -1.062 -1.685 9
-0.182 -0.88 -1.754 8
-0.164 -0.792 -1.579 8
0.175 -0.49 -1.272 9
0.258 -0.229 -0.933 8
0.092 -0.137 -0.838 8
0.0 -0.135 -0.865 9
-0.005 -0.104 -0.826 8
-0.085 -0.016 -0.598 9
-0.077 -0.014 -0.538 6
-0.175 0.076 -0.291 10
-0.2 0.05 -0.533 9
-0.181 0.02 -0.93 8
-0.09 0.326 -0.749 9
0.041 0.949 -0.078 8
0.043 1.541 0.57 8
0.039 1.387 0.513 9
-0.22 1.666 0.876 8
-0.523 1.653 1.187 9
-0.63 1.558 1.599 8
-0.347 1.596 2.203 8
-0.312 1.436 1.983 7
0.889 3.205 3.179 10
0.8 2.885 2.861 9
0.733 3.452 2.518 8
0.514 3.235 2.086 8
0.369 2.749 1.769 9
0.281 2.592 1.792 8
0.226 2.661 1.953 9
0.204 2.395 1.758 8
0.119 2.462 1.626 8
0.144 2.372 1.36 9
0.23 2.138 1.268 8
0.18 1.853 1.399 7
-0.073 1.658 1.665 10
-0.457 1.624 1.826 8
-0.411 1.462 1.643 9
-0.576 1.51 1.731 8
-0.296 1.539 1.652 8
0.206 1.59 1.338 9
0.849 1.622 0.986 8
1.466 1.553 0.71 9
1.848 1.381 0.465 8
1.663 1.243 0.419 8
1.753 1.024 0.315 9
1.482 0.877 0.304 7
0.926 0.898 0.182 10
0.315 0.999 0.008 8
-0.084 1.064 -0.108 8
0.049 1.067 -0.134 9
0.044 0.961 -0.121 8
0.703 1.048 -0.044 9
1.379 1.188 0.094 8
1.938 1.307 0.313 8
2.266 1.454 0.416 9
2.213 1.553 0.167 8
1.991 1.398 0.15 8
1.836 1.422 -0.325 7
1.673 1.346 -0.78 10
1.386 1.171 -1.044 9
1.05 0.893 -1.086 8
0.759 0.574 -0.863 8
0.512 0.314 -0.369 9
0.46 0.283 -0.332 8
0.474 0.064 0.316 9
0.651 -0.112 0.857 8
0.752 -0.248 1.253 8
0.69 -0.368 1.353 9
0.535 -0.406 1.081 8
0.481 -0.366 0.973 7
0.364 -0.375 0.537 10
0.363 -0.467 -0.121 8
0.386 -0.651 -1.012 9
0.168 -0.782 -1.873 8
-0.198 -0.805 -2.456 9
-0.151 -0.825 -2.726 8
-0.136 -0.742 -2.454 8
0.507 -0.907 -2.516 9
1.224 -1.062 -2.162 8
1.221 -0.611 -1.447 8
0.88 -0.264 -0.576 9
0.975 -0.921 0.125 7
1.257 -2.031 0.39 10
1.131 -1.828 0.351 8
1.406 -2.886 0.205 8
0.86 -3.051 -0.558 9
-0.424 -2.644 -1.839 8
-1.573 -2.426 -3.399 9
-2.206 -2.126 -4.829 8
-1.989 -1.753 -5.697 8
-1.79 -1.577 -5.127 9
-1.048 -1.213 -5.157 8
-0.32 -0.931 -4.249 9
0.026 -0.903 -2.721 6
-0.1 -1.084 -0.876 10
-0.493 -1.386 0.76 9
-0.96 -1.655 1.69 8
-0.864 -1.49 1.521 9
-1.325 -1.547 1.363 8
-1.638 -1.222 0.164 8
-1.428 -0.923 -1.472 9
-0.768 -0.882 -2.845 8
-0.226 -0.73 -3.491 9
-0.203 -0.657 -3.142 8
-0.1 -0.298 -3.228 8
-0.411 -0.115 -3.025 7
-0.862 -0.302 -2.568 10
-1.394 -0.326 -1.865 9
-1.895 -0.096 -1.169 8
-2.11 0.245 -0.696 8
-1.899 0.22 -0.627 9
-1.803 0.657 -0.36 8
-1.49 1.194 -0.475 8
-1.09 1.801 -1.066 9
-0.884 2.247 -1.886 8
-1.134 2.45 -2.653 9
-1.678 2.008 -3.152 8
-1.51 1.807 -2.837 7
-2.358 1.158 -2.781 10
-3.182 1.265 -1.762 8
-3.107 1.96 -0.18 9
-1.849 2.887 0.886 8
0.415 3.69 1.226 8
3.056 4.078 1.425 9
2.751 3.67 1.283 8
4.601 3.664 1.515 9
4.7 3.109 1.366 8
3.008 2.206 0.831 8
0.313 1.237 0.281 9
0.282 1.113 0.253 6
-2.355 0.179 -0.064 11
-4.313 -0.434 0.237 8
-5.378 -0.415 1.226 8
-5.327 0.196 2.289 9
-4.199 1.018 2.642 8
-2.353 1.722 2.285 8
-0.427 2.188 1.546 9
-0.385 1.969 1.391 8
0.879 2.145 0.258 9
1.172 1.97 -1.141 8
0.637 1.507 -2.392 8
-0.221 0.73 -3.281 7
-0.831 -0.448 -3.607 10
-1.153 -1.777 -3.101 9
-1.038 -1.599 -2.791 8
-1.234 -2.783 -1.47 8
-1.323 -3.652 0.494 9
-1.286 -4.096 2.751 8
-1.064 -4.113 4.701 9
-0.748 -3.808 5.793 8
-0.32 -3.383 6.001 8
-0.288 -3.045 5.401 9
0.172 -2.62 4.948 8
0.568 -2.128 3.904 7
0.904 -1.582 2.556 10
1.148 -1.09 1.189 8
1.33 -0.622 -0.002 9
1.567 -0.124 -0.962 8
1.41 -0.111 -0.865 8
1.663 0.334 -1.516 9
1.859 0.678 -1.774 8
1.985 0.863 -1.634 9
1.973 0.926 -1.186 8
1.87 0.927 -0.632 8
1.683 0.834 -0.569 9
1.583 0.76 0.002 7
1.524 0.602 0.552 10
1.454 0.391 1.021 8
1.296 0.183 1.386 8
1.06 0.028 1.672 9
0.838 -0.08 1.861 8
0.755 -0.072 1.675 9
0.668 -0.167 1.732 8
0.497 -0.179 1.686 8
0.291 -0.184 1.645 9
0.249 -0.235 1.574 8
0.239 -0.243 1.44 9
0.215 -0.219 1.296 6
0.15 -0.177 1.157 10
-0.006 -0.087 0.972 9
-0.142 -0.003 0.727 8
-0.16 0.04 0.414 9
-0.086 0.064 0.173 8
-0.05 0.079 0.203 8
-0.122 0.079 0.411 9
-0.11 0.071 0.37 8
-0.271 0.054 0.526 9
-0.38 0.017 0.594 8
-0.294 -0.044 0.591 8
-0.15 -0.106 0.532 7
-0.155 -0.134 0.455 10
-0.139 -0.121 0.41 8
-0.329 -0.144 0.251 9
-0.576 -0.198 0.09 8
-0.743 -0.259 0.095 9
-0.749 -0.343 0.154 8
-0.592 -0.417 0.179 8
-0.371 -0.452 0.198 9
-0.334 -0.407 0.178 8
-0.143 -0.448 0.196 9
-0.04 -0.477 0.213 8
0.007 -0.487 0.198 7
0.051 -0.491 0.079 10
0.034 -0.477 -0.098 8
-0.079 -0.448 -0.23 9
-0.071 -0.403 -0.207 8
-0.239 -0.382 -0.301 8
-0.344 -0.372 -0.382 9
-0.311 -0.341 -0.496 8
-0.246 -0.285 -0.585 9
-0.232 -0.235 -0.595 8
-0.219 -0.185 -0.569 8
-0.197 -0.166 -0.512 9
-0.076 -0.121 -0.492 6
0.144 -0.074 -0.545 11
0.255 -0.002 -0.645 8
0.147 0.09 -0.698 8
-0.082 0.185 -0.672 9
-0.074 0.166 -0.605 8
-0.294 0.255 -0.519 8
-0.431 0.323 -0.407 9
-0.496 0.386 -0.323 8
-0.482 0.473 -0.312 9
-0.379 0.538 -0.431 8
-0.23 0.582 -0.621 8
-0.207 0.524 -0.558 7
-0.063 0.614 -0.694 10
0.05 0.746 -0.808 9
0.115 0.904 -0.869 8
0.1 1.042 -0.755 8
0.023 1.238 -0.468 9
-0.005 1.524 -0.147 8
-0.004 1.372 -0.132 9
0.153 1.612 0.033 8
0.525 1.726 -0.029 8
0.978 1.702 -0.196 9
1.295 1.55 -0.331 8
1.165 1.327 -0.516 7
1.222 1.109 -0.841 10
1.1 0.998 -0.757 8
0.753 0.821 -1.039 9
0.29 0.567 -1.074 8
-0.135 0.216 -0.814 8
-0.421 -0.116 -0.355 9
-0.548 -0.45 0.199 8
-0.493 -0.405 0.179 9
-0.377 -0.749 0.771 8
-0.094 -1.013 1.334 8
0.094 -1.158 1.815 9
0.124 -1.196 1.949 7
0.064 -1.17 1.672 10
0.014 -1.136 1.152 8
0.012 -1.022 1.037 8
0.052 -0.967 0.506 9
0.131 -0.909 0.112 8
0.178 -0.9 -0.064 9
0.19 -0.937 -0.001 8
0.16 -1.001 0.318 8
0.137 -1.026 0.807 9
0.123 -0.923 0.726 8
0.309 -0.904 0.988 9
0.665 -0.789 0.95 6
1.001 -0.586 0.904 10
1.298 -0.407 0.892 9
1.476 -0.312 0.825 8
1.516 -0.316 0.759 8
1.364 -0.285 0.683 9
1.235 -0.335 0.654 8
0.894 -0.356 0.557 9
0.494 -0.322 0.386 8
0.15 -0.266 0.168 8
-0.063 -0.262 -0.027 9
-0.056 -0.235 -0.024 8
-0.079 -0.295 0.01 7
0.073 -0.377 0.301 10
0.42 -0.537 0.478 8
0.926 -0.609 0.499 9
1.243 -0.559 0.531 8
1.107 -0.652 0.228 9
0.996 -0.586 0.205 8
0.487 -0.722 -0.374 8
-0.067 -0.741 -1.038 9
-0.29 -0.77 -1.699 8
-0.048 -0.873 -2.079 9
0.383 -0.937 -2.277 8
0.345 -0.843 -2.049 7
0.596 -0.848 -2.223 10
0.879 -0.853 -2.195 8
1.32 -0.94 -1.932 9
1.452 -0.965 -1.49 8
0.978 -0.886 -0.997 8
0.199 -0.846 -0.715 9
0.179 -0.761 -0.644 8
-0.388 -0.823 -0.466 8
-0.415 -0.971 -0.211 9
0.08 -1.044 0.004 8
0.774 -0.995 0.071 9
1.383 -0.825 0.014 6
1.697 -0.543 -0.305 10
1.528 -0.489 -0.275 9
1.323 -0.146 -0.74 8
0.776 0.139 -1.08 9
0.249 0.311 -1.377 8
-0.193 0.478 -1.502 8
-0.502 0.63 -1.257 9
-0.532 0.758 -0.79 8
-0.479 0.682 -0.711 9
-0.345 0.828 -0.186 8
-0.047 0.861 0.303 8
0.33 0.837 0.639 7
0.507 0.851 0.923 10
0.416 0.842 1.181 9
0.129 0.835 1.452 8
0.116 0.751 1.307 8
-0.045 0.779 1.743 9
0.177 0.797 2.274 8
0.769 0.792 2.58 9
1.379 0.857 2.431 8
1.881 0.811 1.991 8
1.693 0.73 1.792 9
1.987 0.551 1.339 8
1.935 0.407 1.028 7
1.825 0.296 0.86 10
1.519 0.331 0.823 8
0.931 0.496 1.015 9
0.332 0.699 1.269 8
0.299 0.629 1.142 8
-0.145 0.999 1.257 9
-0.02 1.209 1.067 8
0.658 1.012 0.603 9
1.405 0.861 0.261 8
1.854 0.776 0.335 8
1.66 0.706 0.903 9
1.494 0.635 0.812 6
0.714 0.777 1.703 11
-0.16 0.963 2.461 8
-0.665 1.126 2.76 8
-0.686 1.275 2.582 9
-0.507 1.296 2.176 8
-0.402 1.073 1.753 9
-0.362 0.965 1.578 8
-0.375 0.579 1.247 8
-0.629 0.366 1.268 9
-1.163 0.37 1.824 8
-1.858 0.506 2.694 8
-1.672 0.455 2.425 7
-2.212 0.664 3.105 10
-2.37 0.819 3.266 9
-2.455 0.701 2.64 8
-2.473 0.597 1.65 8
-1.928 0.687 1.101 9
-1.174 0.131 0.544 8
-0.969 -0.667 -0.007 9
-0.872 -0.601 -0.007 8
-1.226 -0.996 0.028 8
-1.687 -1.271 0.535 9
-2.224 -1.201 1.012 8
-2.371 -1.782 1.142 7
-2.312 -2.706 0.818 10
-2.671 -2.72 0.375 8
-2.404 -2.448 0.338 9
-2.533 -2.135 0.139 8
-2.273 -1.71 -0.232 9
-1.811 -1.408 -0.84 8
-1.215 -1.269 -1.227 8
-0.731 -1.148 -1.441 9
-0.658 -1.174 -1.764 8
-0.468 -1.057 -1.587 8
-0.701 -1.308 -1.908 9
-1.304 -1.623 -2.181 7
-2.152 -1.98 -2.592 10
-2.709 -2.115 -2.726 8
-2.369 -1.922 -2.533 8
-2.132 -1.729 -2.28 9
-0.958 -1.466 -2.28 8
0.319 -1.329 -2.284 9
1.123 -1.179 -2.076 8
1.531 -0.9 -1.58 8
1.41 -0.849 -1.04 9
0.747 -0.977 -0.654 8
0.672 -0.88 -0.588 9
-0.269 -1.091 -0.34 6
-1.295 -1.386 -0.33 10
-2.077 -1.729 -0.614 9
-1.843 -1.728 -0.966 8
-0.741 -1.164 -0.814 9
0.214 -0.73 -0.52 8
0.192 -0.657 -0.468 8
0.678 -0.524 -0.529 9
0.702 -0.409 -0.686 8
0.364 -0.4 -0.998 9
-0.133 -0.521 -1.323 8
-0.705 -0.798 -1.474 8
-0.634 -0.718 -1.326 7
-1.216 -0.946 -1.41 10
-1.564 -0.996 -1.427 8
-1.615 -0.945 -1.753 9
-1.29 -0.805 -2.016 8
-0.687 -0.502 -1.662 9
-0.215 0.0 -1.083 8
-0.193 0.0 -0.975 8
0.098 0.411 -0.388 9
0.244 0.336 -0.073 8
0.241 -0.062 -0.272 9
0.178 -0.251 -0.639 8
0.137 -0.249 -0.801 7
0.174 -0.389 -0.679 10
0.156 -0.35 -0.611 8
0.263 -0.547 -0.22 9
0.376 -0.649 0.344 8
0.459 -0.661 0.854 8
0.562 -0.504 1.116 9
0.801 -0.083 1.086 8
0.721 -0.075 0.978 9
1.025 0.363 0.766 8
1.216 0.568 0.407 8
1.419 0.495 -0.075 9
1.385 0.293 -0.579 6
0.859 0.332 -0.944 11
0.112 0.656 -1.008 8
0.101 0.591 -0.907 8
-0.592 1.071 -0.803 9
-1.128 1.708 -0.612 8
-1.419 2.367 -0.444 8
-1.196 2.661 -0.343 9
-0.55 2.409 -0.162 8
0.112 1.837 0.062 9
0.1 1.653 0.056 8
0.48 1.099 0.298 8
0.438 0.75 0.641 7
0.081 0.676 1.12 10
-0.342 0.715 1.571 9
-0.554 0.711 1.779 8
-0.499 0.64 1.601 8
-0.346 0.601 1.635 9
-0.023 0.531 1.652 8
0.204 0.468 1.637 9
0.298 0.423 1.551 8
0.284 0.35 1.452 8
0.164 0.28 1.355 9
0.147 0.252 1.22 8
0.019 0.186 1.133 7
-0.046 0.084 1.023 10
-0.029 -0.056 0.996 8
0.048 -0.165 0.963 9
0.079 -0.168 0.826 8
0.041 -0.064 0.759 8
0.037 -0.058 0.683 9
-0.012 0.033 0.726 8
-0.028 0.01 0.792 9
-0.049 -0.041 0.758 8
-0.041 -0.137 0.646 8
0.017 -0.26 0.508 9
0.016 -0.234 0.457 7
0.04 -0.208 0.293 10
0.038 -0.074 0.136 8
0.049 0.057 -0.037 8
0.041 0.171 -0.236 9
0.016 0.243 -0.415 8
0.009 0.294 -0.56 9
0.008 0.265 -0.504 8
0.084 0.302 -0.704 8
0.271 0.312 -0.932 9
0.474 0.298 -1.044 8
0.522 0.271 -0.998 9
0.372 0.193 -0.889 6
0.157 0.007 -0.521 10
0.141 0.006 -0.469 9
-0.19 -0.12 0.114 8
-0.532 -0.066 0.462 9
-0.61 0.014 0.467 8
-0.497 0.103 0.256 8
-0.305 0.237 -0.071 9
-0.275 0.213 -0.064 8
-0.057 0.321 -0.42 8
0.112 0.398 -0.654 9
0.209 0.465 -0.739 8
0.218 0.442 -0.736 7
0.138 0.313 -0.638 10
-0.037 0.165 -0.361 8
-0.033 0.148 -0.324 9
-0.29 0.051 0.012 8
-0.486 0.0 0.217 9
-0.447 -0.025 0.253 8
-0.237 -0.032 0.117 8
-0.033 -0.034 -0.063 9
0.09 -0.045 -0.083 8
0.081 -0.04 -0.074 9
0.126 -0.047 0.037 8
0.083 -0.057 0.115 7
-0.042 -0.073 0.153 10
-0.179 -0.09 0.206 8
-0.301 -0.129 0.278 9
-0.351 -0.165 0.341 8
-0.315 -0.149 0.307 8
-0.247 -0.177 0.359 9
-0.113 -0.18 0.394 8
0.034 -0.167 0.441 9
0.146 -0.169 0.577 8
0.195 -0.148 0.801 8
0.176 -0.134 0.721 9
0.198 -0.147 0.88 6
0.174 -0.183 0.827 11
0.058 -0.198 0.713 8
-0.079 -0.194 0.641 8
-0.161 -0.13 0.498 9
-0.137 -0.03 0.303 8
-0.123 -0.027 0.272 8
-0.031 0.053 0.123 9
0.067 0.116 0.024 8
0.144 0.141 -0.058 9
0.136 0.128 -0.116 8
0.035 0.114 -0.151 8
0.032 0.102 -0.136 7
-0.081 0.089 -0.164 10
-0.189 0.057 -0.183 9
-0.242 -0.032 -0.17 8
-0.27 -0.098 -0.169 8
-0.384 -0.035 -0.185 9
-0.506 -0.019 -0.089 8
-0.456 -0.017 -0.08 9
-0.493 -0.143 0.067 8
-0.413 -0.244 0.098 8
-0.246 -0.273 0.029 9
-0.153 -0.234 -0.05 8
-0.172 -0.183 -0.106 7
-0.246 -0.13 -0.152 10
-0.221 -0.117 -0.137 8
-0.294 -0.049 -0.148 9
-0.327 -0.036 -0.11 8
-0.344 -0.052 -0.066 8
-0.299 -0.125 0.022 9
-0.216 -0.129 0.044 8
-0.106 0.034 -0.06 9
-0.095 0.03 -0.054 8
0.093 0.157 -0.14 8
0.236 0.197 -0.217 9
0.211 0.236 -0.294 7
0.063 0.256 -0.281 10
-0.093 0.251 -0.183 8
-0.084 0.226 -0.165 8
-0.178 0.209 -0.06 9
-0.209 0.182 0.024 8
-0.197 0.154 0.097 9
-0.115 0.135 0.132 8
0.087 0.124 0.091 8
0.36 0.106 0.005 9
0.324 0.095 0.005 8
0.452 0.105 -0.143 9
0.307 0.173 -0.273 6
0.046 0.182 -0.222 10
-0.18 0.123 -0.122 9
-0.324 0.094 -0.074 8
-0.376 0.076 -0.081 8
-0.338 0.068 -0.073 9
-0.304 0.05 -0.131 8
-0.234 0.033 -0.159 9
-0.153 0.023 -0.133 8
-0.069 0.017 -0.087 8
-0.002 0.015 -0.062 9
-0.002 0.013 -0.056 8
0.035 0.006 -0.05 7
-0.021 0.015 0.034 10
-0.169 0.031 0.137 8
-0.34 0.022 0.164 9
-0.475 0.002 0.14 8
-0.517 -0.021 0.11 9
-0.465 -0.019 0.099 8
-0.382 -0.037 0.107 8
-0.2 -0.032 0.132 9
-0.03 -0.035 0.181 8
0.103 -0.061 0.235 9
0.17 -0.094 0.229 8
0.153 -0.085 0.206 7
0.12 -0.115 0.162 10
-0.016 -0.093 0.115 8
-0.208 -0.034 0.033 9
-0.309 0.001 -0.1 8
-0.275 0.021 -0.241 8
-0.185 0.034 -0.337 9
-0.166 0.031 -0.304 8
# end
#Thu Feb 26 20:36:57 GMT+08:00 20158
