# Supplementary material for: Abnormal Gait Behavior Detection for Elderly Based on Enhanced Wigner-Ville Analysis and Cloud Incremental SVM Learning
Source: Hindawi journal article supplement (doi:10.1155/2016/5869238), 2016-01-01
Supplement: f1 [file 5869238.f1.zip › Supplementary Materials/Original Data/Backward fall With recovery/original__103.txt]

# Accelerometer Values
# filename:  original__103.txt
# Saving start time: Thu Feb 26 20:36:59 GMT+08:00 2015

# sensor resolution: 0.0095825195m/s^2
#Sensorvendor: KIONIX, name: KX023 Accelerometer, type: 1,version : 1, range 39.240005

# X value, Y value, Z value, time diff in ms
0.032 -0.058 -0.062 9
0.029 -0.052 -0.055 6
0.037 -0.067 -0.07 10
-0.035 -0.089 -0.061 9
-0.14 -0.095 -0.054 8
-0.174 -0.126 -0.035 8
-0.131 -0.164 0.001 9
-0.063 -0.182 0.036 8
0.002 -0.196 0.068 9
0.002 -0.177 0.061 8
0.054 -0.189 0.083 8
0.097 -0.195 0.082 9
0.125 -0.196 0.061 8
0.133 -0.193 0.052 7
0.134 -0.18 0.052 10
0.141 -0.148 0.048 8
0.127 -0.133 0.043 9
0.133 -0.093 0.041 8
0.129 -0.056 0.036 9
0.113 -0.034 0.05 8
0.088 -0.021 0.099 8
0.069 -0.027 0.123 9
0.062 -0.055 0.129 8
0.056 -0.049 0.116 9
0.045 -0.052 0.125 8
0.038 -0.036 0.079 7
0.047 0.003 0.005 10
0.067 0.076 -0.049 8
0.087 0.126 -0.074 9
0.079 0.113 -0.067 8
0.08 0.107 -0.061 8
0.081 0.06 -0.031 9
0.075 0.011 0.043 8
0.046 -0.019 0.144 9
0.017 -0.036 0.216 8
-0.027 -0.053 0.261 8
-0.025 -0.048 0.235 9
-0.093 -0.071 0.236 6
-0.104 -0.087 0.155 11
-0.054 -0.083 0.026 8
-0.015 -0.063 -0.092 8
0.01 -0.043 -0.162 9
0.024 0.001 -0.183 8
0.022 0.001 -0.165 8
0.022 0.058 -0.153 9
0.013 0.073 -0.103 8
-0.005 0.038 0.013 9
-0.041 -0.014 0.148 8
-0.084 -0.058 0.19 8
-0.076 -0.052 0.171 7
-0.133 -0.058 0.127 10
-0.181 -0.005 0.024 9
-0.152 0.056 -0.109 8
-0.062 0.142 -0.262 8
0.01 0.244 -0.424 9
0.036 0.299 -0.526 8
0.032 0.269 -0.474 9
-0.067 0.289 -0.428 8
-0.346 0.291 -0.265 8
-0.636 0.27 -0.109 9
-0.834 0.228 -0.001 8
-0.75 0.086 0.099 7
-0.73 -0.029 0.092 10
-0.657 -0.026 0.082 8
-0.609 0.493 0.202 9
-0.561 1.261 0.344 8
-0.1 1.013 0.151 8
0.593 0.349 -0.19 9
1.051 0.143 -0.665 8
0.946 0.129 -0.599 9
1.18 -0.092 -1.176 8
1.161 -0.585 -1.618 8
0.945 -1.087 -1.797 9
0.545 -1.287 -1.723 7
0.144 -1.16 -1.507 10
-0.184 -0.938 -1.344 8
-0.165 -0.844 -1.209 8
-0.393 -0.723 -1.166 9
-0.482 -0.668 -1.149 8
-0.407 -0.666 -1.136 9
-0.191 -0.719 -1.262 8
0.0 -0.848 -1.569 8
0.121 -0.953 -1.877 9
0.108 -0.858 -1.689 8
0.185 -0.908 -1.76 9
0.246 -0.984 -1.709 6
0.331 -1.185 -1.63 10
0.326 -1.45 -1.476 9
0.193 -1.554 -1.346 8
0.174 -1.398 -1.211 8
0.065 -1.36 -1.09 9
0.011 -1.301 -1.111 8
-0.015 -1.312 -1.092 9
-0.025 -1.427 -1.006 8
-0.024 -1.618 -0.951 8
0.186 -1.603 -0.935 9
0.167 -1.442 -0.842 8
0.512 -1.278 -0.724 7
0.571 -1.209 -0.516 10
0.449 -1.126 -0.309 8
0.374 -0.942 -0.079 9
0.241 -0.892 -0.028 8
0.135 -0.985 -0.21 9
0.121 -0.886 -0.189 8
0.184 -0.789 -0.289 8
0.325 -0.512 -0.293 9
0.499 -0.193 -0.257 8
0.641 0.154 0.016 9
0.589 0.43 0.363 8
0.53 0.387 0.326 7
0.261 0.463 0.618 10
-0.065 0.49 0.969 8
-0.23 0.615 1.105 9
-0.13 0.809 0.951 8
0.147 1.022 0.696 8
0.477 1.359 0.598 9
0.429 1.223 0.538 8
0.783 1.764 0.737 8
1.056 2.321 0.937 9
0.939 2.845 1.016 8
0.716 3.136 1.078 9
0.905 3.105 0.987 6
1.373 3.016 0.919 10
1.235 2.714 0.827 9
1.687 2.818 1.38 8
1.952 2.883 2.431 9
2.183 2.796 3.521 8
2.475 2.854 4.459 8
2.727 2.978 4.97 9
2.996 3.045 4.969 8
2.696 2.741 4.472 9
2.881 2.966 4.076 8
2.967 2.967 3.662 8
3.182 2.596 3.521 7
3.377 2.338 3.518 10
3.582 2.016 3.637 9
3.223 1.815 3.273 8
3.361 1.319 3.458 8
2.98 0.947 3.461 9
2.146 0.715 3.029 8
1.301 0.618 2.184 8
1.004 0.492 1.11 9
1.143 0.386 0.214 8
1.028 0.348 0.193 9
1.221 0.379 -0.194 8
1.45 0.359 -0.207 7
1.484 0.26 0.153 10
1.264 0.129 0.788 8
0.932 0.103 1.315 9
0.439 0.221 1.37 8
0.395 0.199 1.233 8
-0.078 0.414 0.888 9
-0.32 0.552 0.549 8
-0.448 0.433 0.15 9
-0.719 0.248 -0.421 8
-1.082 0.346 -1.024 8
-0.797 0.395 -1.753 9
-0.718 0.356 -1.578 6
0.115 0.037 -2.494 11
0.638 -0.145 -2.94 8
0.854 -0.191 -2.6 8
1.068 -0.562 -2.107 9
1.134 -1.202 -2.132 8
1.02 -1.082 -1.919 9
0.606 -1.79 -2.674 8
-0.49 -2.255 -3.828 8
-1.702 -2.738 -5.283 9
-2.709 -3.168 -7.198 8
-3.553 -3.193 -9.227 8
-3.198 -2.873 -8.304 7
-3.627 -2.664 -9.681 10
-3.543 -2.2 -9.745 9
-3.032 -1.695 -8.505 8
-2.379 -1.245 -6.693 8
-1.841 -0.92 -5.154 9
-1.556 -0.709 -4.239 8
-1.514 -0.538 -4.088 9
-1.362 -0.484 -3.68 8
-1.519 -0.247 -3.832 8
-1.536 0.106 -3.645 9
-1.195 0.457 -3.33 8
-0.454 0.686 -3.073 7
0.43 0.662 -2.665 10
0.763 0.394 -1.946 8
0.686 0.355 -1.751 9
0.25 -0.224 -0.891 8
-0.829 -0.85 0.143 9
-2.182 -0.88 1.564 8
-3.019 -0.208 3.165 8
-2.726 0.789 4.406 9
-2.453 0.71 3.966 8
-1.389 1.713 4.488 8
-0.244 2.707 4.306 9
0.358 3.465 3.334 7
0.028 3.825 1.67 10
-1.242 4.018 -0.033 8
-3.014 4.071 -1.257 8
-2.712 3.664 -1.131 9
-4.022 3.542 -1.246 8
-4.137 3.102 0.12 9
-2.948 2.411 2.491 8
-0.835 1.677 5.169 8
1.321 1.052 7.488 9
2.757 0.659 8.92 8
2.482 0.593 8.028 9
2.946 0.438 8.63 6
2.555 0.403 8.604 10
1.64 0.324 8.01 9
0.523 0.117 6.758 8
-0.376 -0.258 5.07 9
-0.338 -0.232 4.563 8
-0.767 -0.686 4.106 8
-0.701 -1.132 0.865 9
0.163 -1.425 -0.412 8
1.46 -1.669 -1.07 9
2.303 -1.986 -1.44 8
2.352 -2.129 -1.53 8
2.116 -1.916 -1.377 7
1.493 -1.986 -1.311 10
0.629 -2.02 -1.315 8
-0.148 -2.057 -1.386 9
-0.727 -2.127 -1.453 8
-1.094 -2.136 -1.494 9
-1.34 -2.031 -1.535 8
-1.206 -1.828 -1.382 8
-1.384 -1.542 -1.376 9
-1.587 -1.085 -1.309 8
-1.772 -0.5 -1.148 9
-1.739 0.111 -0.887 8
-1.483 0.541 -0.673 7
-1.069 0.809 -0.517 10
-0.962 0.728 -0.466 8
-0.471 0.797 -0.355 9
0.145 0.691 -0.372 8
0.818 0.568 -0.532 8
1.242 0.426 -0.699 9
1.242 0.291 -0.639 8
1.118 0.185 -0.392 9
1.006 0.167 -0.353 8
0.195 0.03 -0.162 8
-0.156 -0.145 -0.052 9
-0.296 -0.31 -0.003 6
-0.275 -0.451 0.003 11
-0.165 -0.535 0.003 8
-0.149 -0.482 0.002 8
-0.026 -0.503 0.01 9
0.074 -0.45 0.026 8
0.138 -0.276 0.039 8
0.207 0.006 0.056 9
0.278 0.32 0.06 8
0.392 0.654 0.071 9
0.352 0.588 0.064 8
0.581 0.888 0.126 8
0.801 1.02 0.27 7
0.882 1.012 0.495 10
0.857 0.931 0.693 9
0.746 0.791 0.741 8
0.516 0.575 0.641 8
0.465 0.517 0.577 9
0.145 0.266 0.42 8
-0.142 0.028 0.197 9
-0.418 -0.192 -0.034 8
-0.68 -0.398 -0.169 8
-0.749 -0.558 -0.252 9
-0.674 -0.502 -0.226 8
-0.538 -0.626 -0.204 7
-0.328 -0.737 0.108 10
0.001 -0.836 0.296 8
0.432 -0.873 0.3 9
0.703 -0.841 0.206 8
0.639 -0.777 -0.003 8
0.575 -0.699 -0.003 9
0.164 -0.607 -0.345 8
-0.42 -0.499 -0.763 9
-0.916 -0.378 -1.227 8
-1.148 -0.244 -1.837 8
-0.828 -0.096 -2.491 9
-0.745 -0.086 -2.242 7
-0.221 -0.052 -2.83 10
0.165 -0.102 -3.187 8
0.549 -0.182 -2.925 8
0.743 -0.291 -2.032 9
0.713 -0.38 -0.975 8
0.52 -0.503 -0.161 9
0.281 -0.615 0.374 8
0.253 -0.553 0.336 8
0.226 -0.606 0.56 9
0.448 -0.641 0.491 8
0.792 -0.74 0.229 9
1.137 -0.833 -0.168 6
1.386 -0.777 -0.586 10
1.248 -0.699 -1.03 9
1.41 -0.551 -0.927 8
1.411 -0.399 -1.351 8
1.182 -0.296 -1.624 9
0.831 -0.324 -1.646 8
0.583 -0.449 -1.453 9
0.503 -0.559 -1.242 8
0.453 -0.503 -1.117 8
0.536 -0.575 -1.049 9
0.735 -0.621 -1.155 8
0.971 -0.614 -1.315 7
1.061 -0.52 -1.354 10
0.933 -0.413 -1.271 8
0.724 -0.342 -1.075 9
0.652 -0.307 -0.968 8
0.483 -0.243 -0.693 9
0.53 -0.187 -0.437 8
0.792 -0.152 -0.336 8
1.009 -0.122 -0.34 9
1.033 0.03 -0.266 8
0.936 0.311 -0.103 9
0.842 0.28 -0.093 8
0.685 0.527 0.071 7
0.463 0.683 0.189 10
0.308 0.762 0.293 8
0.358 0.769 0.411 9
0.593 0.733 0.669 8
0.533 0.66 0.602 8
0.777 0.664 1.094 9
0.895 0.709 1.686 8
0.967 0.732 2.367 9
1.067 0.779 3.034 8
1.174 0.9 3.446 8
1.326 1.016 3.568 9
1.193 0.914 3.211 6
1.428 0.974 3.058 10
1.611 0.962 2.631 9
1.645 0.896 2.114 8
1.533 0.812 1.604 9
1.162 0.748 1.208 8
0.643 0.715 1.015 8
0.578 0.643 0.913 9
0.23 0.682 0.924 8
0.093 0.79 1.117 9
0.054 0.95 1.537 8
0.083 1.088 2.094 8
0.075 0.979 1.885 7
-0.008 1.104 2.523 10
-0.008 0.993 2.27 9
-0.495 0.915 1.995 8
-1.312 0.814 1.563 8
-2.155 0.752 1.166 9
-2.618 0.826 0.941 8
-2.559 1.022 0.86 9
-2.303 0.92 0.774 8
-1.734 1.089 0.696 8
-1.027 1.091 0.503 9
-0.838 0.867 0.209 8
-1.271 0.507 -0.105 7
-2.029 0.161 -0.307 10
-2.715 -0.244 -0.259 8
-2.443 -0.22 -0.233 9
-2.747 -0.555 0.183 8
-2.463 -0.658 0.932 8
-2.03 -0.509 1.615 9
-1.68 -0.205 1.977 8
-1.172 -0.096 1.993 9
-0.951 -0.052 1.568 8
-0.856 -0.047 1.411 8
-0.835 -0.453 0.711 9
-0.829 -1.371 -0.062 7
-1.372 -1.99 -0.349 10
-2.101 -2.1 0.0 8
-2.415 -1.757 0.594 8
-1.919 -1.39 1.224 9
-1.727 -1.251 1.102 8
-0.795 -1.301 1.239 9
0.082 -1.203 1.291 8
0.993 -0.851 1.672 8
1.529 -0.956 1.512 9
0.972 -1.042 0.626 8
0.875 -0.938 0.563 9
-0.546 -0.907 -0.422 6
-2.056 -1.368 -1.715 10
-2.855 -1.608 -2.391 9
-2.106 -1.502 -1.561 8
-0.541 -1.421 -0.631 9
0.304 -0.863 -0.39 8
0.274 -0.776 -0.351 8
0.395 -0.196 -0.283 9
0.437 -0.36 -0.274 8
0.44 -1.043 -0.648 8
0.349 -1.829 -1.095 9
-0.052 -2.463 -1.298 8
-0.047 -2.217 -1.168 7
-0.837 -2.437 -1.293 10
-1.616 -2.139 -1.757 8
-1.778 -1.6 -2.227 9
-1.283 -0.848 -1.046 8
-0.672 -0.01 1.399 9
-0.309 0.361 1.815 8
-0.136 0.154 0.287 8
-0.122 0.139 0.258 9
0.1 -0.442 -0.632 8
0.304 -1.114 -0.88 9
0.305 -1.451 -1.24 8
0.176 -1.336 -1.585 7
0.039 -1.018 -1.661 10
0.035 -0.916 -1.495 8
-0.031 -0.714 -1.345 9
0.005 -0.647 -1.325 8
0.043 -0.522 -1.488 8
0.066 -0.354 -1.774 9
0.133 -0.28 -1.773 8
0.121 -0.407 -1.671 8
0.108 -0.366 -1.504 9
0.018 -0.714 -1.446 8
-0.056 -1.022 -1.362 9
-0.139 -1.15 -1.323 6
-0.184 -1.222 -1.364 10
-0.166 -1.218 -1.365 9
-0.176 -1.064 -1.278 8
-0.158 -0.957 -1.15 9
-0.278 -0.588 -1.029 8
-0.396 -0.083 -0.803 8
-0.387 0.202 -0.59 9
-0.311 0.059 -0.637 8
-0.304 -0.261 -0.828 9
-0.414 -0.44 -0.813 8
-0.373 -0.396 -0.732 8
-0.521 -0.438 -0.462 7
-0.608 -0.434 -0.12 10
-0.597 -0.429 0.218 9
-0.517 -0.406 0.463 8
-0.409 -0.345 0.494 8
-0.368 -0.234 0.368 9
-0.32 -0.21 0.331 8
-0.336 0.005 0.258 8
-0.374 0.332 0.393 9
-0.491 0.619 0.594 8
-0.618 0.753 0.692 9
-0.537 0.73 0.668 8
-0.483 0.657 0.601 7
-0.313 0.632 0.472 10
-0.215 0.748 0.302 8
-0.131 0.932 0.148 9
-0.058 1.054 0.048 8
-0.035 1.089 0.064 8
-0.057 1.064 0.152 9
-0.052 0.957 0.136 8
-0.077 0.901 0.225 9
-0.086 0.826 0.302 8
-0.083 0.758 0.348 8
-0.032 0.686 0.268 9
0.004 0.61 0.506 6
-0.091 0.554 1.182 11
-0.082 0.499 1.063 8
-0.303 0.461 1.631 8
-0.48 0.429 1.884 9
-0.504 0.473 1.838 8
-0.346 0.626 1.52 9
-0.014 0.785 1.038 8
-0.012 0.707 0.6 8
0.386 0.636 0.54 9
0.691 0.705 0.223 8
0.744 0.548 0.069 8
0.528 0.356 0.124 7
0.21 0.172 0.251 10
-0.064 0.047 0.314 9
-0.058 0.042 0.283 8
-0.277 -0.026 0.277 8
-0.341 -0.061 0.202 9
-0.198 -0.082 0.043 8
0.126 0.0 -0.192 9
0.504 0.256 -0.407 8
0.787 0.53 -0.517 8
0.708 0.477 -0.465 9
0.815 0.633 -0.419 8
0.731 0.654 -0.219 7
0.543 0.527 0.034 10
0.325 0.323 0.301 8
0.16 0.186 0.549 9
0.075 0.133 0.754 8
0.067 0.12 0.678 9
0.058 0.096 0.846 8
0.211 -0.021 0.934 8
0.494 -0.151 0.871 9
0.699 -0.125 0.716 8
0.696 -0.058 0.527 8
0.626 -0.075 0.339 9
0.498 -0.068 0.305 7
0.36 -0.198 0.105 10
0.17 -0.213 -0.09 8
-0.075 0.026 -0.133 8
-0.346 0.297 -0.06 9
-0.577 0.449 0.04 8
-0.519 0.404 0.036 9
-0.598 0.434 0.12 8
-0.395 0.236 0.109 8
-0.085 0.012 -0.018 9
0.04 0.064 -0.095 8
0.042 0.22 -0.067 9
0.038 0.198 -0.06 6
0.035 0.278 -0.042 10
0.033 0.296 -0.026 9
0.058 0.182 0.024 8
0.047 0.092 0.046 9
-0.07 0.169 0.101 8
-0.174 0.239 0.188 8
-0.153 0.187 0.159 9
-0.138 0.168 0.143 8
-0.034 0.024 0.014 9
0.125 -0.133 -0.132 8
0.245 -0.135 -0.245 8
0.223 0.019 -0.267 7
0.118 0.094 -0.2 10
-0.049 0.049 -0.105 9
-0.044 0.044 -0.094 8
-0.26 -0.053 0.059 8
-0.441 -0.134 0.266 9
-0.511 -0.241 0.451 8
-0.508 -0.38 0.55 8
-0.48 -0.416 0.543 9
-0.432 -0.374 0.489 8
-0.405 -0.322 0.468 9
-0.378 -0.246 0.41 8
-0.345 -0.19 0.221 7
-0.304 -0.156 -0.029 10
-0.258 -0.11 -0.206 8
-0.23 -0.055 -0.252 9
-0.207 -0.05 -0.227 8
-0.266 -0.006 -0.237 8
-0.432 0.043 -0.283 9
-0.592 0.065 -0.347 8
-0.687 0.072 -0.357 9
-0.737 0.148 -0.421 8
-0.614 0.196 -0.575 8
-0.552 0.176 -0.517 9
-0.259 0.22 -0.676 6
0.028 0.301 -0.819 11
0.206 0.313 -0.762 8
0.228 0.301 -0.476 8
0.105 0.285 -0.131 9
0.095 0.256 0.181 8
-0.112 0.202 0.163 8
-0.304 0.083 0.347 9
-0.406 -0.063 0.33 8
-0.441 -0.164 0.22 9
-0.462 -0.164 0.076 8
-0.398 -0.074 -0.102 8
-0.358 -0.067 -0.092 7
-0.145 0.009 -0.243 10
0.08 0.041 -0.332 9
0.193 0.013 -0.315 8
0.154 -0.044 -0.187 8
-0.021 -0.081 -0.038 9
# end
#Thu Feb 26 20:37:03 GMT+08:00 20153
