# Supplementary material for: Abnormal Gait Behavior Detection for Elderly Based on Enhanced Wigner-Ville Analysis and Cloud Incremental SVM Learning
Source: Hindawi journal article supplement (doi:10.1155/2016/5869238), 2016-01-01
Supplement: f1 [file 5869238.f1.zip › Supplementary Materials/Original Data/Backward fall With recovery/original__104.txt]

# Accelerometer Values
# filename:  original__104.txt
# Saving start time: Thu Feb 26 20:37:05 GMT+08:00 2015

# sensor resolution: 0.0095825195m/s^2
#Sensorvendor: KIONIX, name: KX023 Accelerometer, type: 1,version : 1, range 39.240005

# X value, Y value, Z value, time diff in ms
-0.162 -0.059 -0.156 9
-0.287 -0.093 -0.165 8
-0.359 -0.114 -0.164 7
-0.281 -0.152 -0.168 10
-0.253 -0.174 -0.173 8
-0.094 -0.156 -0.156 9
0.035 -0.158 -0.154 8
0.165 -0.152 -0.135 8
0.284 -0.13 -0.069 9
0.277 -0.121 0.049 8
0.177 -0.122 0.17 9
0.16 -0.11 0.153 8
0.077 -0.121 0.228 8
0.025 -0.172 0.25 9
-0.008 -0.22 0.227 6
-0.019 -0.198 0.183 11
-0.002 -0.14 0.108 8
0.178 -0.008 0.068 8
0.16 -0.007 0.061 9
0.319 0.08 -0.039 8
0.311 -0.013 -0.178 9
0.23 -0.003 -0.153 8
0.074 0.142 -0.069 8
-0.041 0.147 -0.056 9
-0.114 0.051 -0.096 8
-0.103 0.046 -0.086 8
-0.186 0.023 -0.114 7
-0.219 0.034 -0.133 10
-0.161 0.015 -0.152 9
-0.078 -0.005 -0.16 8
0.019 -0.012 -0.151 8
0.11 -0.001 -0.137 9
0.099 -0.001 -0.123 8
0.1 0.027 -0.118 9
0.03 0.095 -0.102 8
-0.039 0.157 -0.072 8
-0.071 0.145 -0.047 9
-0.06 0.1 -0.038 8
-0.054 0.09 -0.034 7
-0.036 0.07 -0.03 10
-0.024 0.087 -0.021 8
-0.01 0.109 -0.004 9
0.005 0.088 0.047 8
0.024 0.042 0.132 9
0.027 0.008 0.21 8
0.024 0.007 0.189 8
0.004 -0.017 0.248 9
-0.014 -0.041 0.284 8
-0.009 -0.069 0.282 8
0.037 -0.094 0.24 9
0.135 -0.097 0.162 7
0.248 -0.068 0.075 10
0.224 -0.061 0.068 8
0.295 -0.022 0.005 8
0.291 0.031 -0.035 9
0.208 0.104 -0.043 8
0.078 0.159 -0.041 9
-0.036 0.185 -0.055 8
-0.103 0.174 -0.072 8
-0.092 0.157 -0.065 9
-0.115 0.128 -0.08 8
-0.107 0.113 -0.108 9
-0.083 0.096 -0.152 6
-0.055 0.071 -0.2 10
-0.035 0.079 -0.243 9
-0.031 0.115 -0.263 8
-0.028 0.103 -0.237 9
0.067 0.149 -0.245 8
0.138 0.19 -0.24 8
0.172 0.199 -0.179 9
0.152 0.181 -0.091 8
0.127 0.147 -0.016 8
0.115 0.132 -0.015 9
0.107 0.079 0.029 8
0.094 0.015 0.022 7
0.058 -0.045 0.001 10
-0.005 -0.086 -0.007 8
-0.073 -0.106 -0.013 9
-0.121 -0.131 -0.009 8
-0.109 -0.118 -0.008 9
-0.136 -0.137 0.011 8
-0.141 -0.155 0.04 8
-0.124 -0.163 0.07 9
-0.067 -0.131 0.073 8
0.003 -0.056 0.051 9
0.01 0.028 0.02 8
0.009 0.025 0.018 7
-0.052 0.075 -0.008 10
-0.149 0.085 -0.011 8
-0.301 0.05 0.005 9
-0.446 -0.03 0.037 8
-0.439 -0.086 0.042 8
-0.395 -0.096 0.059 9
-0.044 -0.086 0.053 8
0.063 -0.128 -0.2 9
-0.311 -0.012 -0.556 8
-0.537 0.249 -0.508 8
-0.446 0.558 -0.229 9
-0.401 0.502 -0.206 6
-0.244 0.886 0.028 11
0.124 0.653 0.214 8
0.495 0.187 0.101 8
0.446 0.112 -0.163 9
0.291 0.027 -0.24 8
0.177 -0.248 -0.477 8
0.182 -0.643 -0.922 9
0.164 -0.579 -0.83 8
0.463 -0.877 -1.232 9
0.791 -1.085 -1.458 8
0.931 -1.244 -1.503 8
1.07 -1.315 -1.307 7
1.186 -1.21 -1.036 10
1.2 -0.95 -0.998 9
1.08 -0.855 -0.898 8
0.898 -0.535 -1.063 8
0.461 -0.172 -1.161 9
-0.09 0.129 -1.138 8
-0.56 0.175 -1.146 9
-0.897 0.035 -1.028 8
-0.808 -0.074 -0.762 8
-0.727 -0.066 -0.686 9
-1.172 -0.117 -0.548 8
-1.044 -0.114 -0.459 7
-0.602 -0.105 -0.401 10
-0.096 -0.265 -0.508 8
0.213 -0.425 -0.566 9
0.192 -0.383 -0.509 8
0.219 -0.519 -0.402 8
0.148 -0.873 -0.558 9
0.057 -1.168 -1.099 8
0.026 -1.181 -1.521 9
0.171 -1.121 -1.638 8
0.356 -1.155 -1.608 8
0.32 -1.04 -1.447 9
0.446 -1.123 -1.25 7
0.659 -1.226 -1.055 10
0.879 -1.35 -1.026 8
0.857 -1.319 -1.169 8
0.598 -1.11 -1.244 9
0.138 -0.997 -0.992 8
0.124 -0.897 -0.893 9
-0.551 -0.996 -0.48 8
-1.083 -1.129 -0.049 8
-1.107 -1.135 0.245 9
-0.793 -0.931 0.287 8
-0.451 -0.605 0.03 9
-0.406 -0.544 0.027 6
-0.036 -0.299 -0.34 10
0.579 -0.125 -0.518 9
1.348 0.204 -0.415 8
1.852 0.721 0.042 9
1.823 1.205 0.535 8
1.213 1.564 0.68 8
1.091 1.407 0.612 9
0.178 1.721 0.69 8
-0.618 2.061 0.711 9
-1.024 2.464 0.628 8
-0.879 2.844 0.632 8
-0.248 3.269 0.409 7
0.837 3.767 0.084 10
0.754 3.39 0.076 8
1.922 3.814 0.178 9
2.423 4.084 0.725 8
2.027 4.218 1.498 9
1.142 4.289 2.149 8
0.489 4.276 2.298 8
0.715 4.277 1.955 9
0.643 3.85 1.759 8
1.671 3.919 1.537 9
2.669 3.676 1.805 8
3.14 3.127 2.592 7
3.077 2.594 3.88 10
2.707 2.182 5.212 8
2.354 1.862 6.014 9
2.119 1.675 5.413 8
2.069 1.471 5.461 8
2.429 1.334 4.661 9
2.939 1.214 3.211 8
3.161 1.095 1.439 8
2.908 0.946 -0.225 9
2.617 0.851 -0.203 8
1.838 0.666 -0.182 9
0.82 0.463 -1.836 6
0.109 0.399 -1.642 10
0.179 0.419 -1.319 9
1.229 0.702 -1.182 8
3.553 1.371 -1.422 9
3.197 1.234 -1.28 8
6.397 1.365 -2.38 8
7.981 0.626 -3.522 9
6.431 -0.341 -3.019 8
3.138 -1.509 -0.816 9
0.091 -2.855 1.769 8
-1.591 -3.888 3.44 8
-1.432 -3.499 3.096 7
-1.56 -4.072 2.952 10
-1.234 -4.052 0.777 9
-1.282 -3.638 -2.339 8
-1.708 -2.88 -5.413 8
-2.153 -1.854 -7.826 9
-2.308 -0.903 -8.896 8
-2.077 -0.813 -8.006 8
-2.078 -0.012 -7.895 9
-1.851 0.593 -6.942 8
-1.49 0.985 -5.655 9
-1.249 1.231 -4.385 8
-1.124 1.108 -3.946 7
-1.105 1.246 -3.152 10
-1.267 1.135 -2.992 8
-1.684 0.873 -3.149 9
-2.132 0.567 -3.134 8
-2.605 0.399 -2.613 8
-2.966 0.527 -1.616 9
-2.873 0.662 -0.487 8
-2.586 0.596 -0.438 9
-2.167 0.601 0.366 8
-1.578 0.478 0.796 8
-1.084 0.205 1.065 9
-0.919 -0.086 1.276 7
-1.194 -0.453 1.367 10
-1.806 -0.949 1.316 8
-1.626 -0.854 1.185 8
-2.381 -1.267 1.088 9
-3.055 -1.354 0.884 8
-3.253 -1.096 0.469 9
-2.764 -0.625 -0.114 8
-1.981 -0.129 -0.874 8
-1.38 0.271 -1.663 9
-1.242 0.243 -1.496 8
-1.071 0.554 -1.863 9
-1.293 0.691 -1.421 6
-1.718 0.589 -0.236 10
-2.08 0.401 1.371 9
-2.025 0.251 2.975 8
-1.822 0.226 2.678 8
-1.183 0.032 3.996 9
-0.134 -0.272 4.928 8
0.886 -0.606 5.41 9
1.502 -0.965 5.35 8
1.619 -1.27 4.759 8
1.3 -1.398 3.739 9
1.17 -1.258 3.365 8
0.602 -1.252 2.149 7
0.019 -1.135 1.041 10
-0.525 -0.917 0.323 8
-0.994 -0.564 -0.025 9
-1.232 -0.23 -0.2 8
-1.13 -0.017 -0.311 9
-1.017 -0.015 -0.28 8
-0.633 0.166 -0.413 8
-0.088 0.298 -0.584 9
0.419 0.366 -0.738 8
0.683 0.432 -0.898 9
0.68 0.488 -1.14 8
0.612 0.439 -1.026 7
0.421 0.445 -1.257 10
0.148 0.403 -1.309 8
-0.053 0.333 -1.241 8
-0.149 0.273 -1.018 9
-0.204 0.243 -0.604 8
-0.217 0.24 -0.153 9
-0.195 0.216 -0.137 8
-0.162 0.247 0.278 8
-0.152 0.312 0.615 9
-0.172 0.353 0.723 8
-0.142 0.308 0.558 9
0.014 0.224 0.316 6
0.283 0.134 0.186 10
0.255 0.12 0.168 9
0.462 -0.006 0.185 8
0.441 -0.143 0.324 9
0.247 -0.26 0.455 8
0.016 -0.371 0.5 8
-0.206 -0.429 0.53 9
-0.356 -0.406 0.571 8
-0.32 -0.366 0.513 9
-0.323 -0.342 0.512 8
-0.22 -0.335 0.495 8
-0.017 -0.331 0.507 7
0.228 -0.327 0.544 10
0.281 -0.277 0.616 8
0.253 -0.249 0.554 9
0.098 -0.171 0.61 8
-0.078 -0.101 0.552 9
-0.181 -0.042 0.386 8
-0.222 0.018 0.215 8
-0.255 0.08 0.093 9
-0.304 0.092 0.007 8
-0.273 0.083 0.006 9
-0.206 0.037 -0.177 8
-0.002 -0.002 -0.452 7
0.066 0.009 -0.584 10
-0.098 0.071 -0.509 8
-0.326 0.136 -0.333 9
-0.42 0.16 -0.153 8
-0.378 0.144 -0.138 8
-0.311 0.191 0.001 9
-0.198 0.272 0.028 8
-0.178 0.34 0.021 9
-0.353 0.421 0.058 8
-0.603 0.509 0.048 8
-0.719 0.554 -0.007 9
-0.647 0.499 -0.006 6
-0.594 0.52 0.0 11
-0.356 0.544 0.081 8
0.042 0.534 0.149 8
0.496 0.503 0.184 9
0.813 0.471 0.207 8
0.732 0.411 0.24 9
0.747 0.37 0.216 8
0.513 0.307 0.297 8
0.282 0.246 0.331 9
0.247 0.192 0.267 8
0.388 0.131 0.198 8
0.349 0.118 0.178 7
0.554 0.01 0.13 10
0.769 -0.169 0.101 9
1.012 -0.376 0.067 8
1.163 -0.519 -0.028 8
1.062 -0.57 -0.195 9
0.744 -0.559 -0.424 8
0.343 -0.538 -0.576 9
0.309 -0.484 -0.518 8
-0.018 -0.476 -0.427 8
-0.119 -0.478 -0.209 9
0.045 -0.514 -0.012 8
0.427 -0.523 0.124 7
0.802 -0.449 0.096 10
1.12 -0.325 -0.071 8
1.008 -0.292 -0.064 9
1.141 -0.171 -0.424 8
0.97 -0.021 -0.992 8
0.66 0.043 -1.532 9
0.299 -0.045 -1.814 8
0.011 -0.24 -1.808 9
0.009 -0.216 -1.593 8
-0.103 -0.194 -1.433 8
0.12 -0.857 -1.094 9
0.6 -1.077 -0.489 7
1.164 -1.24 0.322 10
1.529 -1.304 0.863 8
1.558 -1.31 0.979 8
1.402 -1.179 0.881 9
1.281 -1.264 0.629 8
1.136 -1.336 0.049 9
1.095 -1.367 -0.573 8
1.296 -1.415 -0.92 8
1.782 -1.443 -0.812 9
2.222 -1.363 -0.304 8
2.0 -1.226 -0.273 9
2.066 -1.036 0.229 6
1.763 -0.831 0.467 10
1.332 -0.671 0.481 9
1.028 -0.568 0.438 8
0.965 -0.507 0.451 9
1.094 -0.475 0.421 8
0.985 -0.427 0.379 8
1.155 -0.475 0.262 9
1.177 -0.6 0.175 8
1.111 -0.655 0.216 9
0.922 -0.657 0.203 8
0.515 -0.612 0.027 8
0.464 -0.551 0.024 7
-0.048 -0.432 -0.195 10
-0.52 -0.351 -0.283 8
-0.777 -0.25 -0.093 9
-0.561 -0.277 0.314 8
0.09 -0.456 0.827 9
0.716 -0.425 1.389 8
0.645 -0.383 1.25 8
0.986 -0.134 1.749 9
1.148 0.087 2.04 8
1.253 0.302 2.152 9
1.167 0.643 2.082 8
0.94 0.954 1.756 7
0.784 1.067 1.296 10
0.705 0.96 1.167 8
0.782 0.975 0.819 9
0.999 0.978 0.661 8
1.074 0.987 0.749 8
1.047 1.169 1.118 9
1.018 1.395 1.632 8
0.904 1.461 2.116 9
0.814 1.315 1.905 8
0.573 1.33 2.196 8
0.135 1.396 2.083 9
-0.447 1.574 1.631 6
-0.963 1.716 0.994 10
-1.308 1.762 0.415 9
-1.492 1.72 0.061 8
-1.343 1.548 0.055 9
-1.247 1.507 0.017 8
-1.161 1.349 0.349 8
-1.527 1.076 0.948 9
-2.078 0.867 1.617 8
-2.569 0.698 2.117 9
-2.312 0.628 1.905 8
-2.753 0.609 2.354 8
-2.977 0.796 2.549 7
-2.845 0.982 2.032 10
-2.301 1.04 1.23 9
-1.769 0.919 0.579 8
-1.538 0.612 -0.089 8
-1.384 0.551 -0.08 9
-1.353 0.174 -0.801 8
-1.546 -0.299 -1.48 9
-2.076 -0.782 -1.761 8
-2.838 -1.13 -1.484 8
-3.329 -1.319 -0.809 9
-3.312 -1.333 0.095 8
-2.981 -1.199 0.086 7
-2.495 -1.098 0.858 10
-1.672 -1.04 1.296 8
-0.809 -1.155 1.527 9
-0.028 -1.318 1.546 8
0.413 -1.51 1.172 8
0.55 -1.486 0.759 9
0.495 -1.338 0.683 8
0.341 -1.219 0.442 9
-0.284 -1.206 0.167 8
-0.79 -1.032 0.262 8
-0.915 -0.904 0.481 9
-0.824 -0.814 0.433 7
-0.847 -0.891 0.48 10
-0.783 -0.962 0.432 8
-0.451 -0.863 0.865 8
0.093 -0.797 0.925 9
0.63 -0.869 0.145 8
1.027 -0.783 -1.067 9
0.941 -0.516 -2.043 8
0.847 -0.465 -1.838 8
0.465 -0.354 -2.587 9
0.115 -0.527 -3.049 8
-0.193 -0.903 -2.858 9
-0.479 -1.194 -2.001 6
-0.721 -1.257 -1.045 10
-0.599 -1.223 -0.332 9
-0.539 -1.1 -0.299 8
0.137 -0.765 0.259 9
0.838 0.095 0.743 8
1.401 0.66 0.786 8
1.974 0.242 0.213 9
2.294 -0.692 -0.648 8
2.29 -1.554 -1.377 8
2.061 -1.399 -1.24 9
1.642 -1.83 -1.512 8
0.866 -1.819 -1.401 7
0.141 -1.762 -1.167 10
-0.472 -1.604 -0.859 8
-0.941 -1.172 -0.73 9
-0.847 -0.727 -1.02 8
-0.762 -0.655 -0.918 9
-0.507 -0.472 -1.489 8
0.047 -0.491 -1.3 8
0.203 -0.304 -0.1 9
-0.106 -0.107 -0.115 8
-0.57 -0.46 -1.44 9
-0.513 -0.414 -1.296 8
-1.001 -0.979 -1.996 7
-1.474 -1.146 -1.841 10
-1.854 -0.882 -1.369 8
-2.081 -0.423 -0.972 9
-1.92 -0.033 -0.748 8
-1.309 0.051 -0.618 8
-1.178 0.045 -0.556 9
-0.497 -0.076 -0.477 8
-0.047 -0.133 -0.467 8
0.139 -0.121 -0.623 9
0.115 -0.116 -0.823 8
-0.055 -0.144 -0.81 9
-0.049 -0.13 -0.729 6
-0.259 -0.193 -0.549 10
-0.393 -0.264 -0.366 9
-0.446 -0.283 -0.211 8
-0.421 -0.288 -0.021 9
-0.389 -0.304 0.113 8
-0.369 -0.223 0.22 8
-0.262 0.022 0.424 9
-0.236 0.02 0.382 8
-0.136 0.315 0.457 9
-0.104 0.433 0.283 8
-0.126 0.457 0.102 8
-0.263 0.567 0.084 7
-0.464 0.641 0.055 10
-0.418 0.577 0.049 9
-0.371 0.329 -0.043 8
-0.249 0.146 -0.084 8
-0.377 0.401 -0.07 9
-0.582 0.857 -0.034 8
-0.675 1.324 -0.05 8
-0.608 1.635 -0.09 9
-0.547 1.472 -0.081 8
-0.39 1.473 -0.101 9
-0.229 1.229 -0.108 8
-0.251 1.033 -0.065 7
-0.487 0.85 0.14 10
-0.838 0.687 0.723 8
-1.126 0.618 1.397 9
-1.013 0.556 1.257 8
-1.062 0.502 1.554 8
-0.851 0.448 1.472 9
-0.392 0.465 1.112 8
0.227 0.539 0.636 9
0.745 0.615 0.219 8
0.972 0.692 -0.028 8
0.875 0.622 -0.026 9
0.821 0.678 -0.047 7
0.569 0.612 0.049 10
0.233 0.456 0.184 8
-0.121 0.322 0.393 8
-0.426 0.242 0.594 9
-0.384 0.218 0.534 8
-0.476 0.192 0.481 9
-0.327 0.208 0.573 8
-0.053 0.241 0.504 8
0.319 0.306 0.388 9
0.647 0.358 0.158 8
0.777 0.31 -0.042 8
0.699 0.279 -0.038 7
0.649 0.128 -0.18 10
0.374 0.094 -0.361 9
-0.008 0.245 -0.504 8
-0.372 0.408 -0.482 8
-0.636 0.523 -0.384 9
-0.673 0.597 -0.264 8
-0.605 0.537 -0.238 9
-0.447 0.532 0.039 8
-0.192 0.23 0.367 8
-0.004 -0.173 0.606 9
0.058 -0.356 0.802 8
0.11 -0.419 0.9 7
0.14 -0.444 0.843 10
0.126 -0.4 0.759 8
0.082 -0.369 0.597 9
0.009 -0.274 0.384 8
-0.042 -0.16 0.157 9
-0.061 -0.131 0.03 8
-0.067 -0.185 0.086 8
-0.071 -0.232 0.246 9
-0.064 -0.209 0.221 8
-0.028 -0.232 0.378 8
0.085 -0.229 0.442 9
0.246 -0.211 0.426 7
0.357 -0.195 0.378 10
0.388 -0.181 0.307 8
0.35 -0.163 0.276 8
0.367 -0.151 0.16 9
0.382 -0.133 0.051 8
0.366 -0.114 0.042 9
0.321 -0.095 0.107 8
0.285 -0.085 0.196 8
0.269 -0.069 0.257 9
0.242 -0.062 0.231 8
0.231 -0.042 0.255 9
0.231 -0.043 0.292 6
0.258 -0.053 0.328 10
0.307 -0.062 0.362 9
0.384 -0.08 0.383 8
0.468 -0.142 0.331 9
0.421 -0.128 0.297 8
0.431 -0.154 0.189 8
0.31 -0.08 0.118 9
0.081 0.02 0.12 8
-0.121 0.058 0.122 9
-0.213 0.03 0.086 8
-0.191 0.011 0.053 8
-0.172 0.01 0.048 7
-0.047 0.008 0.013 10
0.063 0.047 -0.027 9
0.14 0.049 -0.112 8
0.202 0.008 -0.124 8
0.082 0.006 -0.01 9
-0.226 0.003 0.031 8
-0.203 0.003 0.028 8
-0.449 0.004 0.008 9
-0.522 0.02 -0.032 8
-0.474 0.029 -0.11 9
-0.312 0.042 -0.2 8
-0.28 0.038 -0.18 7
-0.087 0.042 -0.249 10
-0.016 0.014 -0.207 8
-0.206 0.041 0.124 9
-0.54 0.025 0.322 8
-0.745 0.145 0.303 8
-0.698 0.248 0.162 9
-0.481 0.151 -0.258 8
-0.432 0.135 -0.232 9
-0.249 0.15 -0.562 8
-0.096 0.19 -0.618 8
0.04 0.222 -0.442 9
0.08 0.238 -0.138 6
0.019 0.18 0.139 11
-0.094 0.104 0.281 8
-0.084 0.094 0.253 8
-0.293 0.076 0.253 9
-0.542 0.116 0.088 8
-0.633 0.104 -0.225 8
-0.431 -0.085 -0.481 9
-0.178 -0.154 -0.641 8
-0.15 0.108 -0.741 9
-0.135 0.097 -0.667 8
# end
#Thu Feb 26 20:37:10 GMT+08:00 20158
