# Supplementary material for: Abnormal Gait Behavior Detection for Elderly Based on Enhanced Wigner-Ville Analysis and Cloud Incremental SVM Learning
Source: Hindawi journal article supplement (doi:10.1155/2016/5869238), 2016-01-01
Supplement: f1 [file 5869238.f1.zip › Supplementary Materials/Original Data/Backward fall With recovery/original__105.txt]

# Accelerometer Values
# filename:  original__105.txt
# Saving start time: Thu Feb 26 20:37:12 GMT+08:00 2015

# sensor resolution: 0.0095825195m/s^2
#Sensorvendor: KIONIX, name: KX023 Accelerometer, type: 1,version : 1, range 39.240005

# X value, Y value, Z value, time diff in ms
0.184 0.016 -0.349 8
0.15 0.02 -0.275 9
0.065 0.006 -0.181 8
0.059 0.005 -0.163 8
-0.024 -0.031 -0.036 9
-0.072 -0.064 0.083 8
-0.093 -0.11 0.183 9
-0.091 -0.183 0.237 8
-0.022 -0.233 0.226 8
0.123 -0.242 0.183 9
0.111 -0.218 0.165 6
0.215 -0.199 0.111 11
0.218 -0.157 0.043 8
0.147 -0.1 0.007 8
0.034 -0.05 0.004 9
-0.058 -0.025 -0.009 8
-0.052 -0.022 -0.042 8
-0.102 -0.042 -0.038 9
-0.116 -0.056 -0.076 8
-0.117 -0.038 -0.125 9
-0.119 -0.018 -0.152 8
-0.119 -0.002 -0.142 8
-0.107 -0.002 -0.128 7
-0.095 0.028 -0.113 10
-0.06 0.077 -0.063 9
-0.027 0.074 0.015 8
-0.019 0.025 0.079 8
-0.024 -0.021 0.165 9
-0.026 -0.06 0.262 8
0.019 -0.094 0.316 9
0.017 -0.084 0.284 8
0.097 -0.119 0.302 8
0.139 -0.137 0.308 9
0.101 -0.137 0.298 8
0.031 -0.116 0.262 7
-0.014 -0.085 0.187 10
-0.032 -0.062 0.068 8
-0.029 -0.056 0.061 9
0.004 -0.038 -0.068 8
0.098 0.003 -0.17 9
0.19 0.09 -0.221 8
0.22 0.16 -0.249 8
0.216 0.146 -0.247 9
0.191 0.105 -0.201 8
0.172 0.095 -0.18 8
0.138 0.092 -0.119 9
0.114 0.072 -0.075 7
0.075 0.023 -0.058 10
0.034 -0.01 -0.061 8
0.012 -0.037 -0.082 8
0.011 -0.033 -0.074 9
0.015 -0.028 -0.117 8
0.069 0.017 -0.174 9
0.16 0.05 -0.21 8
0.229 0.061 -0.195 8
0.238 0.083 -0.114 9
0.21 0.097 0.042 8
0.189 0.087 0.037 9
0.167 0.07 0.179 6
0.145 0.014 0.222 10
0.073 -0.016 0.197 9
-0.065 -0.003 0.145 8
-0.157 -0.002 0.085 9
-0.149 -0.034 -0.004 8
-0.134 -0.031 -0.004 8
-0.043 -0.034 -0.107 9
0.07 0.033 -0.167 8
0.132 0.134 -0.176 8
0.168 0.204 -0.164 9
0.174 0.222 -0.129 8
0.157 0.2 -0.116 7
0.112 0.197 -0.052 10
0.013 0.178 0.015 8
-0.098 0.145 0.057 9
-0.174 0.117 0.069 8
-0.198 0.082 0.055 9
-0.194 0.016 0.045 8
-0.184 -0.055 0.065 8
-0.166 -0.049 0.058 9
-0.113 -0.107 0.09 8
0.003 -0.15 0.117 9
0.124 -0.173 0.134 8
0.188 -0.178 0.15 7
0.194 -0.162 0.148 10
0.174 -0.146 0.133 8
0.145 -0.129 0.107 9
0.1 -0.111 0.078 8
0.055 -0.088 0.05 8
0.009 -0.057 0.009 9
-0.052 -0.024 -0.032 8
-0.098 -0.001 -0.07 9
-0.088 -0.001 -0.063 8
-0.08 0.028 -0.087 8
-0.033 0.057 -0.092 9
0.025 0.061 -0.074 6
0.059 0.07 -0.019 11
0.069 0.093 0.045 8
0.057 0.112 0.1 8
0.051 0.101 0.09 9
0.01 0.13 0.119 8
-0.011 0.147 0.102 8
0.009 0.155 0.061 9
0.028 0.172 0.018 8
0.046 0.156 -0.04 9
0.068 0.101 -0.123 8
0.061 0.091 -0.111 8
0.035 0.063 -0.187 7
-0.072 0.06 -0.219 10
-0.196 0.033 -0.234 9
-0.262 -0.022 -0.245 8
-0.29 -0.059 -0.248 8
-0.261 -0.053 -0.223 9
-0.266 -0.057 -0.226 8
-0.244 -0.081 -0.213 9
-0.216 -0.084 -0.178 8
-0.18 -0.039 -0.114 8
-0.118 -0.02 -0.073 9
-0.098 -0.041 -0.128 8
-0.088 -0.036 -0.115 7
-0.131 -0.031 -0.207 10
-0.183 0.019 -0.298 8
-0.264 0.053 -0.392 9
-0.358 0.029 -0.457 8
-0.415 -0.012 -0.515 8
-0.422 -0.059 -0.542 9
-0.38 -0.053 -0.488 8
-0.328 -0.125 -0.45 9
-0.211 -0.205 -0.39 8
-0.102 -0.256 -0.368 8
-0.035 -0.267 -0.407 9
0.012 -0.265 -0.471 7
0.04 -0.255 -0.519 10
0.036 -0.229 -0.467 8
0.057 -0.218 -0.524 8
0.187 -0.309 -0.569 9
0.255 -0.326 -0.613 8
0.17 -0.234 -0.644 9
0.111 -0.359 -0.67 8
0.054 -0.531 -0.734 8
0.048 -0.478 -0.661 9
0.001 -0.498 -0.711 8
0.198 -0.324 -0.535 9
0.327 -0.257 -0.475 6
0.218 -0.575 -1.021 10
0.496 -1.324 -1.689 9
0.446 -1.191 -1.52 8
0.775 -1.703 -1.842 8
0.757 -1.461 -1.887 9
0.665 -1.075 -1.812 8
0.494 -0.923 -1.694 9
0.255 -1.013 -1.646 8
0.005 -1.274 -1.608 8
0.005 -1.147 -1.448 9
-0.179 -1.39 -1.259 8
-0.198 -1.339 -0.943 7
-0.346 -1.005 -0.474 10
-0.697 -0.62 0.024 8
-0.954 -0.295 0.468 9
-1.054 -0.065 0.838 8
-0.949 -0.058 0.754 9
-0.871 -0.073 0.787 8
-0.558 -0.402 0.516 8
-0.075 -0.837 0.23 9
0.417 -1.102 0.014 8
0.787 -1.168 -0.13 9
0.932 -1.123 -0.101 8
0.839 -1.01 -0.091 7
0.811 -0.879 0.146 10
0.714 -0.674 0.497 8
0.484 -0.68 0.744 9
0.258 -0.866 0.836 8
0.275 -0.786 0.911 8
0.395 -0.56 0.908 9
0.356 -0.504 0.817 8
0.446 -0.406 0.705 8
0.514 -0.143 0.621 9
0.616 0.303 0.576 8
0.794 0.761 0.573 9
0.714 0.685 0.516 6
1.133 1.14 0.768 10
1.698 1.622 1.066 9
2.048 2.262 1.095 8
2.013 2.858 0.96 9
1.688 3.112 0.648 8
1.295 2.981 0.158 8
0.851 2.688 -0.3 9
0.766 2.419 -0.27 8
0.358 2.307 -0.382 9
-0.015 2.39 -0.002 8
-0.406 2.548 0.79 8
-0.537 2.555 1.752 7
-0.285 2.313 2.467 10
0.202 1.991 2.678 9
0.182 1.792 2.41 8
0.658 1.562 2.159 8
0.959 1.465 1.864 9
1.12 1.52 1.686 8
1.203 1.614 1.598 9
1.155 1.646 1.76 8
0.927 1.632 1.996 8
0.835 1.469 1.796 9
0.54 1.434 2.065 8
0.404 1.43 2.226 7
0.604 1.447 2.124 10
1.049 1.449 1.958 8
1.526 1.475 1.748 9
1.373 1.328 1.573 8
1.695 1.304 1.265 8
1.677 1.227 0.965 9
1.431 1.196 0.752 8
1.013 1.124 0.617 9
0.437 1.028 0.503 8
0.099 0.966 0.369 8
0.089 0.869 0.332 9
0.156 0.867 0.159 6
0.491 0.987 -0.133 11
0.895 1.173 -0.587 8
1.124 1.264 -0.946 8
1.154 1.196 -1.046 9
0.951 0.927 -0.923 8
0.856 0.834 -0.83 9
0.454 0.5 -0.387 8
0.006 0.261 0.249 8
-0.219 0.136 0.883 9
0.026 -0.011 1.323 8
0.625 -0.095 1.355 8
0.562 -0.086 1.219 7
1.143 -0.116 0.936 10
1.446 -0.331 0.475 9
1.352 -0.44 -0.183 8
1.129 -0.396 -0.88 8
1.058 -0.349 -1.413 9
1.121 -0.292 -1.722 8
1.009 -0.263 -1.55 9
1.082 -0.259 -1.632 8
1.014 -0.37 -1.39 8
0.914 -0.531 -1.008 9
0.779 -0.605 -0.892 8
0.473 -0.674 -1.154 7
-0.024 -0.849 -1.855 10
-0.021 -0.764 -1.669 8
-0.637 -1.033 -2.724 9
-1.302 -1.363 -3.841 8
-1.817 -1.756 -4.92 9
-2.117 -2.034 -5.841 8
-2.33 -2.077 -6.125 8
-2.403 -2.15 -5.486 9
-2.162 -1.935 -4.937 8
-2.011 -2.073 -3.667 8
-1.728 -2.158 -2.114 9
-1.531 -2.383 -0.629 7
-1.515 -2.683 0.433 10
-1.609 -2.937 0.91 8
-1.82 -2.995 1.01 8
-1.638 -2.696 0.909 9
-1.794 -2.509 0.738 8
-1.576 -2.062 0.412 9
-1.133 -1.428 0.181 8
-0.66 -0.713 -0.186 8
-0.266 -0.032 -0.838 9
-0.239 -0.029 -0.754 8
-0.075 0.543 -1.339 9
-0.088 1.069 -1.58 6
-0.229 1.598 -1.424 10
-0.31 1.986 -1.102 9
-0.341 2.209 -0.858 8
-0.391 2.475 -0.527 9
-0.352 2.227 -0.475 8
-0.15 2.388 -0.187 8
-0.019 2.407 -0.193 9
-0.406 2.46 -0.281 8
-1.123 2.455 -0.34 9
-1.771 2.261 -0.4 8
-2.277 1.869 -0.434 8
-2.049 1.682 -0.391 7
-2.384 1.271 -0.34 10
-2.398 0.888 -0.207 8
-2.005 0.518 0.096 9
-1.1 0.217 0.51 8
0.003 0.148 0.56 9
0.925 0.301 0.153 8
0.832 0.271 0.138 8
1.117 0.395 -0.603 9
0.95 0.473 -1.165 8
0.922 0.376 -1.256 9
0.802 0.097 -1.048 8
0.722 0.087 -0.943 7
0.505 -0.005 -0.353 10
0.349 0.073 0.638 8
0.239 0.291 1.907 9
0.049 0.792 3.103 8
-0.022 0.99 4.008 8
0.337 0.437 4.477 9
0.714 -0.456 4.47 8
0.642 -0.41 4.023 9
0.343 -1.04 3.681 8
-0.755 -1.198 3.046 8
-1.941 -1.276 2.291 9
-2.589 -1.175 1.653 6
-2.406 -0.837 1.223 11
-1.483 -0.533 0.772 8
-1.335 -0.479 0.695 8
-0.203 -0.136 0.107 9
0.913 0.025 -0.437 8
1.935 -0.189 -0.84 8
2.352 -0.391 -1.228 9
2.013 -0.396 -1.497 8
1.335 -0.396 -1.549 9
1.202 -0.356 -1.394 8
0.498 -0.47 -1.347 8
-0.098 -0.674 -1.147 7
-0.483 -0.88 -0.78 10
-0.667 -0.981 -0.401 9
-0.7 -1.028 -0.064 8
-0.63 -0.925 -0.057 8
-0.555 -1.041 0.314 9
-0.483 -1.139 0.624 8
-0.511 -1.05 0.742 9
-0.575 -0.826 0.671 8
-0.59 -0.614 0.378 8
-0.576 -0.446 -0.019 9
-0.518 -0.402 -0.017 8
-0.523 -0.272 -0.331 7
-0.536 -0.165 -0.564 10
-0.524 -0.067 -0.752 8
-0.458 0.014 -0.884 9
-0.301 0.075 -0.955 8
-0.125 0.097 -0.951 8
-0.113 0.087 -0.856 9
-0.008 0.054 -0.73 8
0.032 -0.004 -0.463 9
0.052 -0.05 -0.192 8
0.03 -0.043 -0.045 8
-0.095 -0.007 0.031 9
-0.085 -0.007 0.027 7
-0.277 -0.004 0.091 10
-0.412 -0.04 0.152 8
-0.395 -0.082 0.198 8
-0.273 -0.111 0.245 9
-0.112 -0.122 0.438 8
0.076 -0.127 0.775 9
0.068 -0.114 0.697 8
0.314 -0.196 1.01 8
0.573 -0.121 1.304 9
0.765 0.069 1.48 8
0.849 0.081 1.462 9
0.683 0.101 1.382 6
0.371 0.137 1.227 10
0.334 0.124 1.104 9
0.076 0.134 0.866 8
-0.066 0.159 0.579 9
-0.069 0.163 0.332 8
-0.001 0.141 0.186 8
0.099 0.099 0.114 9
0.306 0.038 0.059 8
0.275 0.034 0.053 9
0.559 -0.017 -0.058 8
0.697 -0.04 -0.154 8
0.602 -0.049 -0.123 7
0.336 -0.077 -0.037 10
0.007 -0.13 0.024 8
-0.271 -0.162 0.048 9
-0.244 -0.146 0.043 8
-0.441 -0.15 0.026 9
-0.562 -0.14 -0.068 8
-0.611 -0.122 -0.233 8
-0.529 -0.113 -0.452 9
-0.342 -0.105 -0.657 8
-0.308 -0.095 -0.591 9
-0.164 -0.069 -0.689 8
-0.138 -0.018 -0.682 7
-0.235 0.028 -0.563 10
-0.387 0.049 -0.353 8
-0.484 0.045 -0.114 9
-0.493 0.023 0.115 8
-0.443 0.021 0.103 8
-0.38 0.002 0.179 9
-0.26 -0.003 0.067 8
-0.109 0.013 -0.15 9
0.101 0.061 -0.396 8
0.279 0.185 -0.587 8
0.262 0.396 -0.631 9
0.236 0.356 -0.568 6
0.067 0.565 -0.445 10
-0.104 0.72 -0.207 9
-0.188 0.895 0.054 8
-0.212 1.112 0.232 9
-0.216 1.276 0.378 8
-0.151 1.415 0.509 8
-0.136 1.274 0.458 9
0.039 1.502 0.549 8
0.391 1.76 0.583 9
0.859 2.046 0.588 8
1.233 2.279 0.65 8
1.11 2.051 0.585 7
1.283 2.122 0.701 10
1.219 2.039 0.794 9
1.008 1.843 0.846 8
0.764 1.529 0.849 8
0.643 1.049 0.812 9
0.845 0.44 0.761 8
1.265 -0.125 0.689 9
1.138 -0.112 0.62 8
1.517 -0.61 0.648 8
1.56 -1.069 0.814 9
1.202 -1.347 1.143 8
0.846 -1.804 1.491 7
0.653 -2.365 1.678 10
0.536 -2.623 1.658 8
0.482 -2.361 1.493 9
0.419 -2.48 1.009 8
0.402 -2.566 0.086 8
0.434 -2.69 -1.065 9
0.341 -2.638 -2.322 8
-0.007 -2.34 -3.503 9
-0.407 -1.933 -4.562 8
-0.366 -1.74 -4.106 8
-0.565 -1.394 -4.883 9
-0.46 -1.15 -5.1 7
-0.118 -1.011 -4.797 10
0.308 -1.012 -4.055 8
0.817 -1.063 -2.99 8
0.736 -0.957 -2.691 9
1.246 -0.956 -1.64 8
1.506 -0.878 -0.819 9
1.445 -0.728 -0.229 8
1.172 -0.514 0.07 8
0.715 -0.33 0.032 9
0.23 -0.209 -0.134 8
0.207 -0.188 -0.12 9
-0.09 -0.076 -0.343 6
-0.207 0.102 -0.751 10
-0.058 0.159 -1.293 9
0.286 0.093 -1.791 8
0.511 0.17 -1.998 8
0.516 0.374 -1.856 9
0.464 0.336 -1.671 8
0.347 0.55 -1.319 9
0.21 0.706 -0.797 8
0.223 0.832 -0.248 8
0.488 0.927 0.044 9
0.9 0.985 -0.018 8
0.81 0.887 -0.016 7
1.279 0.869 -0.321 10
1.684 0.773 -0.657 8
1.832 0.591 -0.8 9
1.593 0.314 -0.732 8
1.156 -0.001 -0.399 9
0.842 -0.273 0.139 8
0.758 -0.246 0.125 8
0.774 -0.388 0.579 9
1.029 -0.346 0.806 8
1.193 -0.146 0.878 9
1.029 0.038 0.878 8
0.547 0.179 0.971 7
-0.07 0.364 1.239 10
-0.063 0.328 1.115 8
-0.508 0.499 1.444 9
-0.522 0.557 1.852 8
-0.271 0.697 2.339 8
-0.089 1.2 2.554 9
0.162 1.649 2.346 8
0.722 1.584 1.943 8
0.65 1.426 1.749 9
1.395 0.992 1.42 8
2.025 0.46 1.352 9
2.332 -0.107 1.702 6
2.291 -0.792 2.212 10
2.161 -1.283 2.722 9
2.337 -1.331 3.389 8
2.103 -1.198 3.05 9
2.403 -1.059 3.757 8
2.471 -0.798 4.212 8
2.34 -0.572 4.368 9
2.082 -0.374 4.713 8
1.604 -0.15 5.356 9
1.444 -0.135 4.82 8
0.723 -0.19 5.338 8
0.002 -0.415 5.618 7
-0.701 -0.278 5.639 10
-1.399 0.291 5.289 9
-1.892 0.788 4.655 8
-2.207 1.054 3.856 8
-1.987 0.949 3.471 9
-2.273 1.111 2.59 8
-2.572 1.116 1.582 9
-2.653 1.178 0.655 8
-2.412 1.142 -0.003 8
-2.355 0.678 -0.396 9
-2.583 0.127 -0.518 8
-2.325 0.114 -0.466 7
-2.447 -0.044 -0.211 10
-2.274 0.049 0.416 8
-2.016 -0.109 0.765 9
-1.81 -0.473 0.545 8
-1.61 -0.933 0.159 8
-1.445 -1.511 -0.253 9
-1.3 -1.36 -0.228 8
-1.24 -1.824 -0.728 9
-1.251 -1.998 -1.292 8
-1.343 -2.041 -1.711 8
-1.491 -1.973 -1.834 9
-1.342 -1.776 -1.65 6
-1.435 -1.6 -1.579 11
-1.416 -1.421 -1.255 8
-1.4 -1.276 -0.844 8
-1.409 -1.146 -0.781 9
-1.349 -1.035 -1.103 8
-1.169 -0.944 -1.672 9
-0.958 -0.948 -2.255 8
-0.862 -0.854 -2.029 8
-0.827 -0.948 -2.377 9
-0.731 -1.232 -2.606 8
-0.764 -1.349 -2.631 8
-1.167 -0.877 -2.319 7
-1.586 -0.174 -1.898 10
-1.836 0.365 -1.669 9
-1.652 0.328 -1.502 8
-1.59 0.384 -1.609 8
-1.156 -0.025 -1.937 9
-0.72 -0.333 -2.326 8
-0.514 -0.36 -2.586 9
-0.461 -0.425 -2.595 8
-0.415 -0.545 -2.393 8
-0.499 -0.491 -2.154 9
-0.597 -0.644 -1.888 8
-0.604 -0.758 -1.647 7
-0.511 -0.771 -1.495 10
-0.353 -0.782 -1.38 8
-0.224 -0.799 -1.263 9
-0.201 -0.719 -1.136 8
-0.148 -0.785 -1.093 9
-0.178 -0.898 -1.148 8
-0.382 -0.955 -1.287 8
-0.716 -0.966 -1.277 9
-1.091 -1.049 -0.949 8
-1.391 -1.134 -0.583 8
-1.252 -1.02 -0.524 9
-1.342 -1.023 -0.377 7
-1.189 -0.985 -0.39 10
-0.845 -0.921 -0.509 8
-0.476 -0.847 -0.763 8
-0.235 -0.786 -1.068 9
-0.142 -0.757 -1.203 8
-0.127 -0.681 -1.082 9
-0.131 -0.658 -1.022 8
-0.214 -0.7 -0.943 8
-0.492 -0.768 -0.812 9
-0.927 -0.715 -0.483 8
-1.216 -0.549 -0.163 9
-1.094 -0.494 -0.147 6
-1.161 -0.304 -0.084 10
-0.961 -0.068 -0.207 9
-0.396 0.219 -0.429 8
0.279 0.499 -0.594 9
0.779 0.787 -0.542 8
1.014 0.892 -0.361 8
0.912 0.802 -0.325 9
0.848 0.72 -0.032 8
0.55 0.661 0.319 9
0.126 0.66 0.593 8
-0.249 0.78 0.811 8
-0.419 0.999 0.858 7
-0.295 1.158 0.713 10
-0.265 1.042 0.642 8
0.065 1.19 0.501 9
0.391 1.409 0.402 8
0.52 1.601 0.396 9
0.386 1.662 0.632 8
0.123 1.589 0.963 8
-0.083 1.318 1.111 9
-0.074 1.186 1.0 8
-0.338 0.98 1.039 9
-0.687 1.05 1.139 8
-0.959 1.284 1.247 7
-1.066 1.544 1.294 10
-0.821 1.427 1.302 8
-0.739 1.285 1.171 9
-0.331 0.92 1.066 8
-0.071 0.738 0.952 8
0.028 0.597 0.97 9
0.014 0.413 1.023 8
-0.092 0.299 1.019 9
-0.221 0.235 0.974 8
-0.199 0.212 0.877 8
-0.29 0.172 0.823 9
-0.308 0.155 0.724 6
-0.237 0.17 0.561 11
-0.059 0.194 0.344 8
0.23 0.189 0.149 8
0.479 0.161 0.082 9
0.431 0.144 0.073 8
0.494 0.12 0.163 8
0.343 0.084 0.326 9
0.101 0.04 0.441 8
-0.054 0.019 0.447 9
-0.1 -0.001 0.366 8
-0.1 -0.016 0.204 8
-0.09 -0.015 0.184 7
-0.06 -0.002 -0.107 10
0.087 0.011 -0.318 9
0.297 0.045 -0.432 8
0.432 0.119 -0.569 8
0.496 0.141 -0.616 9
0.446 0.127 -0.555 8
0.435 0.095 -0.477 9
0.241 0.083 -0.229 8
-0.025 0.029 0.019 8
-0.28 0.073 0.101 9
-0.464 0.12 0.179 8
-0.418 0.108 0.161 7
-0.428 0.019 0.169 10
-0.258 -0.021 -0.065 8
0.068 -0.019 -0.315 9
0.388 0.025 -0.438 8
0.557 0.122 -0.466 8
0.543 0.178 -0.287 9
0.284 0.168 0.014 8
0.255 0.151 0.012 9
-0.15 0.155 0.23 8
-0.441 0.106 0.38 8
-0.556 -0.008 0.468 9
-0.598 -0.053 0.44 7
-0.532 -0.063 0.244 10
-0.193 -0.092 -0.058 8
-0.174 -0.083 -0.052 8
0.28 -0.104 -0.302 9
0.538 -0.114 -0.33 8
0.557 -0.109 -0.116 9
0.431 -0.096 0.175 8
0.224 -0.083 0.39 8
0.202 -0.074 0.351 9
0.016 -0.057 0.469 8
-0.083 -0.044 0.506 9
-0.17 -0.059 0.513 6
-0.323 -0.077 0.56 10
-0.429 -0.055 0.601 9
-0.392 -0.038 0.449 8
-0.353 -0.034 0.404 9
-0.257 -0.079 0.115 8
# end
#Thu Feb 26 20:37:17 GMT+08:00 2015 
