# Supplementary material for: Abnormal Gait Behavior Detection for Elderly Based on Enhanced Wigner-Ville Analysis and Cloud Incremental SVM Learning
Source: Hindawi journal article supplement (doi:10.1155/2016/5869238), 2016-01-01
Supplement: f1 [file 5869238.f1.zip › Supplementary Materials/Original Data/Backward fall With recovery/original__107.txt]

# Accelerometer Values
# filename:  original__107.txt
# Saving start time: Thu Feb 26 20:37:26 GMT+08:00 2015

# sensor resolution: 0.0095825195m/s^2
#Sensorvendor: KIONIX, name: KX023 Accelerometer, type: 1,version : 1, range 39.240005

# X value, Y value, Z value, time diff in ms
-0.164 0.17 -0.801 8
-0.035 0.169 -0.713 8
-0.031 0.152 -0.642 7
0.114 0.164 -0.437 10
0.219 0.143 -0.151 8
0.253 0.098 0.125 9
0.231 0.03 0.336 8
0.19 -0.054 0.432 9
0.138 -0.127 0.428 8
0.139 -0.149 0.336 8
0.125 -0.134 0.303 9
0.182 -0.095 0.174 8
0.217 -0.026 0.018 9
0.21 0.027 -0.102 8
0.166 0.066 -0.11 7
0.107 0.092 -0.059 10
0.062 0.094 0.004 8
0.056 0.085 0.004 9
0.026 0.071 0.058 8
-0.011 0.0 0.109 8
-0.08 -0.084 0.158 9
-0.123 -0.13 0.183 8
-0.064 -0.115 0.152 9
-0.057 -0.104 0.137 8
0.053 -0.02 0.068 8
0.142 0.044 -0.003 9
0.192 0.041 -0.053 6
0.191 0.014 -0.051 11
0.135 0.012 0.0 8
0.074 0.026 0.055 8
0.067 0.023 0.049 9
0.044 0.026 0.07 8
0.065 0.022 0.07 9
0.096 0.005 0.078 8
0.091 -0.009 0.103 8
0.05 -0.015 0.138 9
-0.008 -0.032 0.149 8
-0.007 -0.029 0.134 8
-0.028 -0.038 0.109 7
0.022 -0.022 0.066 10
0.107 -0.027 0.032 9
0.173 -0.072 0.019 8
0.199 -0.109 0.039 8
0.186 -0.109 0.056 9
0.168 -0.098 0.05 8
0.115 -0.046 0.022 9
0.043 0.021 -0.052 8
-0.056 0.063 -0.136 8
-0.189 0.099 -0.194 9
-0.304 0.116 -0.238 8
-0.273 0.104 -0.214 7
-0.334 0.127 -0.229 10
-0.32 0.167 -0.171 8
-0.24 0.15 -0.056 9
-0.142 0.078 0.07 8
-0.043 -0.006 0.164 8
0.049 -0.078 0.205 9
0.044 -0.07 0.184 8
0.109 -0.108 0.198 9
0.181 -0.114 0.188 8
0.295 -0.101 0.145 8
0.393 -0.077 0.09 9
0.381 -0.042 0.056 7
0.25 0.003 0.057 10
0.225 0.003 0.051 8
0.047 0.033 0.056 8
-0.088 0.036 0.021 9
-0.153 0.032 -0.045 8
-0.16 0.02 -0.116 9
-0.114 0.004 -0.159 8
-0.059 -0.006 -0.17 8
-0.053 -0.005 -0.153 9
-0.024 0.0 -0.121 8
-0.01 0.01 -0.049 9
0.0 0.0 0.019 6
-0.031 -0.012 0.065 10
-0.108 -0.023 0.091 9
-0.097 -0.021 0.082 8
-0.172 -0.04 0.086 8
-0.23 -0.045 0.044 9
-0.262 -0.039 -0.054 8
-0.233 -0.037 -0.195 9
-0.139 -0.029 -0.325 8
-0.045 -0.016 -0.386 8
-0.04 -0.015 -0.348 9
-0.003 -0.012 -0.32 8
-0.045 -0.024 -0.23 7
-0.13 -0.041 -0.158 10
-0.204 -0.052 -0.141 8
-0.252 -0.055 -0.18 9
-0.274 -0.06 -0.284 8
-0.247 -0.054 -0.256 9
-0.252 -0.034 -0.384 8
-0.242 -0.016 -0.466 8
-0.212 -0.039 -0.483 9
-0.167 -0.068 -0.424 8
-0.136 -0.084 -0.29 9
-0.137 -0.091 -0.147 8
-0.123 -0.082 -0.132 7
-0.139 -0.086 -0.062 10
-0.155 -0.091 -0.04 8
-0.165 -0.102 0.042 9
-0.168 -0.128 0.169 8
-0.167 -0.222 0.245 8
-0.151 -0.199 0.221 9
-0.142 -0.359 0.251 8
-0.112 -0.528 0.198 9
-0.071 -0.702 -0.018 8
-0.035 -0.823 -0.314 8
-0.021 -0.841 -0.629 9
-0.019 -0.757 -0.566 6
-0.027 -0.721 -0.907 10
0.008 -0.663 -1.106 9
0.026 -0.558 -1.297 8
-0.046 -0.315 -1.628 9
-0.073 -0.029 -1.847 8
0.124 0.189 -1.787 8
0.259 0.107 -1.837 9
0.233 0.096 -1.653 8
0.099 -0.211 -1.965 9
-0.173 -0.379 -2.088 8
-0.512 -0.432 -1.992 8
-0.718 -0.492 -1.839 7
-0.691 -0.639 -1.678 10
-0.622 -0.824 -1.544 9
-0.559 -0.742 -1.39 8
-0.014 -0.885 -1.39 8
0.237 -0.936 -1.585 9
0.467 -0.857 -1.962 8
0.633 -0.956 -2.018 9
0.754 -1.382 -1.72 8
0.679 -1.244 -1.548 8
0.735 -1.686 -1.456 9
0.622 -1.818 -1.491 8
0.346 -1.645 -1.503 7
0.029 -1.449 -1.443 10
-0.318 -1.304 -1.187 8
-0.666 -1.151 -0.765 9
-0.6 -1.036 -0.689 8
-0.826 -0.881 -0.207 8
-0.91 -0.718 0.18 9
-0.839 -0.504 0.316 8
-0.535 -0.275 0.255 9
-0.067 -0.132 0.133 8
0.416 -0.045 0.155 8
0.374 -0.041 0.139 9
0.759 -0.037 0.386 7
0.909 -0.149 0.881 10
0.872 -0.24 1.595 8
0.742 -0.123 2.318 8
0.587 0.328 2.889 9
0.528 0.295 2.6 8
0.448 1.017 2.958 9
0.51 1.852 3.025 8
0.737 2.532 2.861 8
1.203 3.061 2.782 9
1.792 3.481 2.954 8
2.31 3.307 3.019 9
2.079 2.976 2.717 6
2.413 2.305 2.641 10
2.26 1.689 2.591 9
1.573 1.366 2.503 8
0.542 1.366 2.413 8
-0.514 1.715 2.436 9
-1.085 2.269 2.482 8
-0.976 2.042 2.234 9
-0.754 2.414 2.293 8
0.13 2.407 2.485 8
1.234 2.17 2.749 9
1.968 1.824 2.758 8
1.771 1.641 2.483 7
1.363 1.576 2.222 10
1.226 1.418 2.0 8
0.485 1.428 1.749 9
-0.103 1.395 1.551 8
-0.19 1.319 1.405 9
0.346 1.207 1.323 8
1.261 1.074 1.486 8
1.135 0.967 1.337 9
2.03 0.827 1.846 8
2.652 0.667 2.468 9
2.861 0.57 2.885 8
2.592 0.591 2.64 7
2.03 0.695 1.672 10
1.233 0.784 0.419 8
1.11 0.705 0.377 9
0.139 0.721 -0.592 8
-0.659 0.615 -1.011 8
-0.94 0.46 -0.976 9
-0.398 0.341 -0.443 8
0.633 0.252 0.369 8
1.481 0.206 1.083 9
1.333 0.185 0.974 8
1.763 0.151 1.296 9
1.629 0.107 0.999 6
1.105 -0.076 0.129 10
0.364 -0.14 -0.945 9
-0.443 0.014 -2.039 8
-0.398 0.012 -1.835 9
-0.824 0.213 -2.835 8
-0.858 0.559 -3.36 8
-0.557 0.659 -3.276 9
0.321 0.208 -2.706 8
1.392 -0.516 -1.785 9
1.849 -1.209 -0.585 8
1.664 -1.088 -0.526 8
1.355 -1.901 0.453 7
0.648 -2.736 0.686 10
-0.372 -3.0 0.161 9
-1.584 -2.4 -0.83 8
-2.396 -1.516 -2.15 8
-2.273 -0.898 -3.395 9
-2.046 -0.808 -3.055 8
-1.206 -0.473 -3.727 8
-0.161 -0.381 -3.612 9
0.609 -0.405 -3.013 8
0.983 -0.624 -2.335 9
1.072 -1.05 -1.677 8
0.965 -0.945 -1.509 7
0.66 -1.373 -1.081 10
-0.092 -1.53 -0.838 8
-1.078 -1.434 -0.642 9
-2.019 -1.328 -0.704 8
-2.606 -1.173 -1.035 8
-2.449 -0.904 -1.322 9
-2.204 -0.813 -1.54 8
-1.512 -0.594 -1.386 9
-0.791 -0.449 -1.579 8
-0.306 -0.199 -1.542 8
-0.137 0.153 -1.217 9
-0.373 0.306 -0.908 6
-0.732 0.366 -0.692 11
-0.659 0.329 -0.623 8
-0.878 0.54 -0.39 8
-1.008 0.759 -0.264 9
-0.747 0.781 -0.274 8
-0.14 0.598 -0.334 8
0.329 0.454 -0.36 9
0.234 0.439 -0.245 8
0.211 0.395 -0.221 9
-0.395 0.455 0.198 8
-0.98 0.542 0.938 8
-1.261 0.571 1.446 7
-1.218 0.502 1.176 10
-0.695 0.383 0.395 9
0.285 0.403 -0.49 8
0.256 0.362 -0.441 8
1.184 0.759 -1.241 9
1.672 1.387 -1.725 8
1.417 1.795 -1.737 9
0.477 1.843 -1.136 8
-0.696 1.716 -0.358 8
-0.626 1.544 0.278 9
-1.868 1.39 0.25 8
-2.937 1.441 0.955 7
-3.246 1.224 1.634 10
-2.536 0.635 2.054 8
-1.391 0.128 2.093 9
-0.432 -0.051 1.934 8
-0.389 -0.046 1.74 9
0.3 -0.032 1.429 8
0.882 0.011 1.044 8
1.237 -0.228 0.862 9
1.051 -0.417 0.773 8
0.463 -0.422 0.7 8
-0.113 -0.56 0.565 9
-0.102 -0.504 0.508 7
-0.478 -0.678 0.224 10
-0.519 -0.758 -0.069 8
-0.167 -0.74 -0.328 8
0.402 -0.715 -0.647 9
0.801 -0.683 -0.888 8
0.978 -0.694 -0.815 9
0.88 -0.625 -0.733 8
0.953 -0.894 -0.541 8
0.724 -1.166 -0.483 9
0.234 -1.134 -0.469 8
-0.292 -0.997 -0.529 9
-0.262 -0.897 -0.476 6
-0.876 -0.979 -0.688 10
-0.788 -0.881 -0.619 9
-0.915 -0.543 -0.625 8
-0.902 -0.193 -0.645 9
-0.77 0.05 -0.678 8
-0.601 0.28 -0.645 8
-0.498 0.558 -0.53 9
-0.448 0.502 -0.477 8
-0.436 0.557 -0.353 9
-0.423 0.326 -0.199 8
-0.413 0.125 -0.002 8
-0.41 0.039 0.126 7
-0.358 -0.006 0.146 10
-0.261 -0.029 0.131 9
-0.234 -0.026 0.118 8
-0.115 -0.022 0.164 8
-0.009 -0.022 0.307 9
0.025 -0.037 0.487 8
-0.011 -0.064 0.603 8
-0.094 -0.09 0.628 9
-0.19 -0.098 0.606 8
-0.171 -0.089 0.545 9
-0.221 -0.107 0.522 8
-0.207 -0.138 0.532 7
-0.171 -0.159 0.564 10
-0.104 -0.189 0.667 8
0.009 -0.224 0.844 9
0.008 -0.234 0.969 8
0.007 -0.21 0.872 8
0.139 -0.195 0.937 9
0.153 -0.156 0.911 8
0.174 -0.129 0.748 9
0.148 -0.127 0.46 8
0.038 -0.134 0.13 8
0.034 -0.12 0.117 9
-0.08 -0.139 -0.12 6
-0.129 -0.153 -0.247 11
-0.148 -0.134 -0.331 8
-0.19 -0.131 -0.334 8
-0.281 -0.175 -0.165 9
-0.392 -0.222 0.11 8
-0.353 -0.2 0.099 8
-0.401 -0.235 0.301 9
-0.329 -0.233 0.37 8
-0.197 -0.192 0.353 9
-0.101 -0.144 0.264 8
-0.07 -0.087 0.136 8
-0.063 -0.079 0.122 7
-0.056 0.026 0.002 10
-0.033 0.162 -0.044 9
0.0 0.262 -0.043 8
0.007 0.31 -0.065 8
-0.076 0.327 -0.029 9
-0.262 0.348 0.085 8
-0.479 0.384 0.168 9
-0.431 0.345 0.151 8
-0.569 0.375 0.1 8
-0.597 0.413 -0.088 9
-0.549 0.496 -0.266 8
-0.44 0.593 -0.364 7
-0.344 0.657 -0.4 10
-0.31 0.591 -0.36 8
-0.212 0.573 -0.348 9
-0.089 0.458 -0.313 8
0.017 0.377 -0.262 8
0.104 0.399 -0.207 9
0.194 0.446 -0.156 8
0.289 0.471 -0.026 9
0.26 0.424 -0.024 8
0.366 0.42 0.211 8
0.535 0.379 0.432 9
0.774 0.34 0.605 7
0.976 0.311 0.758 10
1.122 0.228 0.866 8
1.243 0.046 0.892 8
1.118 0.041 0.803 9
1.192 -0.168 0.773 8
1.195 -0.32 0.717 9
1.115 -0.409 0.636 8
0.943 -0.456 0.54 8
0.72 -0.5 0.437 9
0.51 -0.545 0.332 8
0.459 -0.49 0.299 9
0.31 -0.533 0.169 6
0.24 -0.555 -0.03 10
0.283 -0.525 -0.329 9
0.358 -0.427 -0.681 8
0.356 -0.281 -1.02 9
0.321 -0.253 -0.918 8
0.27 -0.114 -1.238 8
0.197 0.04 -1.484 9
0.158 0.216 -1.646 8
0.166 0.356 -1.738 8
0.155 0.414 -1.794 9
0.241 0.439 -1.772 8
0.217 0.395 -1.594 7
0.355 0.328 -1.498 10
0.374 0.133 -1.388 8
0.312 -0.049 -1.168 9
0.182 -0.178 -0.778 8
0.062 -0.272 -0.371 9
0.039 -0.365 -0.038 8
0.035 -0.329 -0.034 8
0.065 -0.459 0.095 9
0.125 -0.674 -0.021 8
0.203 -0.93 -0.275 9
0.177 -1.171 -0.591 8
0.159 -1.054 -0.532 7
-0.133 -1.422 -0.943 10
-0.119 -1.28 -0.849 8
-0.243 -1.155 -0.657 9
-0.279 -0.896 -0.261 8
-0.195 -0.604 0.114 8
-0.07 -0.136 0.257 9
0.242 0.292 0.435 8
0.218 0.263 0.391 9
0.794 0.296 0.739 8
1.335 0.093 0.833 8
1.769 -0.148 0.58 9
2.099 -0.351 0.267 6
2.327 -0.584 0.099 10
2.452 -0.862 0.029 9
2.207 -0.776 0.026 8
2.127 -1.01 0.032 9
1.723 -1.087 0.14 8
1.024 -0.836 0.434 8
0.219 -0.409 0.977 9
-0.298 -0.124 1.475 8
-0.254 0.091 1.618 9
-0.229 0.082 1.456 8
0.055 0.267 1.318 8
0.341 0.376 1.168 7
0.68 0.533 1.253 10
0.937 0.715 1.472 9
1.164 0.622 1.71 8
1.415 0.325 1.942 8
1.273 0.292 1.748 9
1.476 0.24 1.892 8
1.632 0.389 1.803 9
1.862 0.564 1.574 8
2.146 0.76 1.39 8
2.28 0.863 1.178 9
2.052 0.776 1.06 8
1.935 0.855 0.855 7
1.427 1.065 0.748 10
0.781 1.253 0.741 8
0.339 1.316 0.799 9
0.12 1.446 0.908 8
-0.023 1.581 1.054 8
-0.021 1.423 0.948 9
-0.287 1.418 1.199 8
-0.68 1.246 1.56 9
-1.267 0.971 1.967 8
-2.002 0.739 2.306 8
-2.638 0.693 2.408 9
-2.374 0.624 2.167 7
-2.786 0.766 2.01 10
-2.962 0.931 1.526 8
-3.017 1.064 0.961 8
-3.032 1.133 0.657 9
-2.981 0.98 0.576 8
-2.83 0.585 0.663 9
-2.482 0.046 0.916 8
-2.233 0.042 0.824 8
-1.854 -0.513 1.055 9
-1.821 -0.665 1.176 8
-2.044 -0.444 1.283 9
-2.059 -0.441 1.208 6
-1.853 -0.663 0.794 10
-1.667 -0.597 0.714 9
-1.58 -0.757 0.007 8
-1.457 -0.82 -0.776 8
-1.23 -0.783 -1.435 9
-1.061 -0.753 -1.89 8
-1.014 -0.892 -1.859 9
-1.079 -1.121 -1.362 8
-0.971 -1.009 -1.225 8
-0.984 -1.272 -0.581 9
-0.842 -1.413 -0.034 8
-0.63 -1.39 0.229 7
-0.438 -1.438 0.135 10
-0.24 -1.612 -0.319 8
-0.045 -1.752 -1.005 9
-0.04 -1.577 -0.904 8
-0.062 -1.589 -1.584 9
-0.281 -1.491 -2.163 8
-0.521 -1.377 -2.659 8
-0.842 -1.314 -2.923 9
-0.993 -1.392 -2.737 8
-0.955 -1.59 -2.354 9
-0.86 -1.431 -2.119 8
-1.034 -1.379 -1.846 7
-1.347 -1.009 -1.581 10
-1.42 -0.753 -1.471 8
-1.11 -0.838 -1.668 9
-0.724 -1.013 -2.008 8
-0.652 -0.911 -1.807 8
-0.407 -0.969 -2.089 9
-0.311 -0.957 -2.323 8
-0.372 -0.884 -2.469 8
-0.496 -0.796 -2.346 9
-0.574 -0.725 -1.956 8
-0.581 -0.76 -1.473 9
-0.523 -0.684 -1.326 6
-0.395 -0.941 -0.942 10
-0.304 -1.224 -0.703 9
-0.395 -1.296 -0.539 8
-0.45 -1.23 -0.262 9
-0.412 -1.07 -0.011 8
-0.294 -0.957 0.178 8
-0.265 -0.861 0.16 9
0.034 -0.874 0.344 8
0.399 -0.869 0.303 9
0.609 -0.856 0.145 8
0.664 -0.839 0.042 8
0.649 -0.77 0.03 7
0.51 -0.68 -0.055 10
0.459 -0.612 -0.049 9
0.151 -0.565 -0.272 8
0.0 -0.473 -0.43 8
-0.04 -0.237 -0.61 9
-0.133 0.078 -0.676 8
-0.139 0.311 -0.499 8
-0.125 0.28 -0.449 9
-0.054 0.364 -0.253 8
0.127 0.273 -0.057 9
0.316 0.165 0.118 8
0.434 0.12 0.325 7
0.599 0.092 0.535 10
0.752 0.189 0.644 8
0.676 0.17 0.579 9
0.717 0.307 0.568 8
0.703 0.382 0.498 8
0.638 0.496 0.493 9
0.487 0.681 0.504 8
0.316 0.827 0.458 9
0.169 0.901 0.333 8
0.152 0.811 0.299 8
0.026 0.877 0.107 9
-0.099 0.907 -0.111 6
-0.205 0.91 -0.327 11
-0.196 0.886 -0.449 8
-0.182 0.912 -0.536 8
-0.235 1.089 -0.6 9
-0.211 0.98 -0.54 8
-0.169 1.147 -0.454 9
-0.059 1.154 -0.275 8
-0.103 1.143 -0.056 8
-0.225 1.122 0.146 9
-0.34 0.996 0.088 8
-0.306 0.897 0.079 8
-0.531 0.938 -0.148 7
-0.79 1.18 -0.165 10
-0.953 1.398 -0.062 9
-0.99 1.508 0.055 8
-0.842 1.362 0.276 8
-0.542 1.021 0.461 9
-0.488 0.919 0.415 8
-0.143 0.637 0.503 9
0.206 0.405 0.542 8
0.457 0.214 0.552 8
0.562 0.066 0.574 9
0.553 -0.112 0.687 8
0.498 -0.101 0.619 7
0.355 -0.257 0.767 10
0.097 -0.362 0.856 8
-0.118 -0.453 0.895 9
-0.212 -0.516 0.863 8
-0.2 -0.531 0.782 9
-0.099 -0.486 0.685 8
0.061 -0.402 0.588 8
0.054 -0.362 0.529 9
0.219 -0.254 0.453 8
0.322 -0.09 0.407 8
0.357 0.107 0.376 9
0.352 0.263 0.347 7
0.31 0.37 0.365 10
0.279 0.333 0.328 8
0.186 0.416 0.403 8
0.017 0.505 0.468 9
-0.177 0.617 0.49 8
-0.31 0.71 0.463 9
-0.367 0.773 0.389 8
-0.376 0.795 0.284 8
-0.339 0.715 0.255 9
-0.329 0.683 0.198 8
-0.303 0.592 0.22 9
-0.238 0.477 0.285 6
-0.076 0.349 0.37 10
0.171 0.177 0.439 9
0.409 -0.031 0.447 8
0.368 -0.028 0.402 9
0.473 -0.155 0.449 8
0.436 -0.135 0.387 8
0.417 -0.123 0.151 9
0.426 -0.147 -0.037 8
0.399 -0.139 -0.153 9
0.417 -0.115 -0.211 8
0.376 -0.104 -0.19 8
0.497 -0.043 -0.229 7
0.685 0.079 -0.276 10
0.834 0.21 -0.276 8
0.872 0.243 -0.179 9
0.81 0.139 -0.034 8
0.729 0.125 0.092 9
0.59 0.113 0.083 8
0.387 -0.108 0.166 8
0.207 -0.171 0.168 9
0.085 -0.203 0.075 8
-0.043 -0.164 -0.103 9
-0.186 -0.048 -0.299 8
-0.167 -0.044 -0.269 7
-0.268 0.09 -0.43 10
# end
#Thu Feb 26 20:37:30 GMT+08:00 2015.
