# Supplementary material for: Abnormal Gait Behavior Detection for Elderly Based on Enhanced Wigner-Ville Analysis and Cloud Incremental SVM Learning
Source: Hindawi journal article supplement (doi:10.1155/2016/5869238), 2016-01-01
Supplement: f1 [file 5869238.f1.zip › Supplementary Materials/Original Data/Backward fall With recovery/original__108.txt]

# Accelerometer Values
# filename:  original__108.txt
# Saving start time: Thu Feb 26 20:37:32 GMT+08:00 2015

# sensor resolution: 0.0095825195m/s^2
#Sensorvendor: KIONIX, name: KX023 Accelerometer, type: 1,version : 1, range 39.240005

# X value, Y value, Z value, time diff in ms
-0.243 -0.014 -0.701 9
-0.241 -0.052 -0.538 8
-0.226 -0.076 -0.317 9
-0.194 -0.091 -0.121 8
-0.146 -0.099 0.0 8
-0.027 -0.1 0.032 9
-0.024 -0.09 0.029 6
0.142 -0.081 -0.018 11
0.25 -0.066 -0.09 8
0.273 -0.048 -0.144 8
0.241 -0.014 -0.138 9
0.138 0.018 -0.078 8
-0.011 0.022 0.001 8
-0.01 0.02 0.001 9
-0.124 0.013 0.099 8
-0.185 0.009 0.167 9
-0.2 0.002 0.175 8
-0.153 -0.017 0.129 8
0.02 -0.037 0.049 7
0.241 -0.038 0.001 10
0.217 -0.034 0.001 9
0.336 -0.018 -0.021 8
0.388 0.0 -0.035 8
0.396 0.015 -0.008 9
0.334 0.054 0.041 8
0.233 0.099 0.074 9
0.096 0.117 0.101 8
0.087 0.105 0.091 8
-0.076 0.084 0.141 9
-0.197 0.047 0.183 8
-0.253 0.009 0.194 7
-0.267 -0.01 0.178 10
-0.244 -0.012 0.15 8
-0.219 -0.011 0.135 9
-0.127 0.024 0.116 8
0.037 0.104 0.075 8
0.165 0.149 -0.026 9
0.195 0.157 -0.165 8
0.138 0.186 -0.258 9
0.042 0.233 -0.303 8
0.038 0.21 -0.273 8
-0.025 0.243 -0.334 9
-0.008 0.255 -0.383 7
0.076 0.24 -0.378 10
0.174 0.198 -0.324 8
0.303 0.178 -0.238 8
0.424 0.207 -0.139 9
0.381 0.187 -0.125 8
0.429 0.225 -0.036 9
0.363 0.195 0.016 8
0.145 0.112 0.072 8
-0.145 0.049 0.13 9
-0.346 0.037 0.113 8
-0.422 0.047 -0.006 9
-0.38 0.042 -0.006 6
-0.399 0.046 -0.179 10
-0.385 0.049 -0.326 9
-0.35 0.003 -0.418 8
-0.299 -0.06 -0.458 9
-0.222 -0.074 -0.447 8
-0.2 -0.067 -0.403 8
-0.037 -0.06 -0.39 9
0.168 -0.042 -0.316 8
0.264 -0.01 -0.119 9
0.251 -0.025 0.114 8
0.187 -0.088 0.308 8
0.169 -0.079 0.277 7
0.094 -0.14 0.397 10
0.064 -0.194 0.431 8
0.083 -0.228 0.404 9
0.11 -0.227 0.358 8
0.155 -0.203 0.335 9
0.238 -0.184 0.31 8
0.315 -0.17 0.285 8
0.284 -0.153 0.257 9
0.308 -0.12 0.272 8
0.277 -0.073 0.292 9
0.233 -0.043 0.276 8
0.181 -0.028 0.23 7
0.124 -0.005 0.178 10
0.086 0.022 0.121 8
0.077 0.02 0.109 9
0.066 0.052 0.04 8
0.068 0.064 -0.031 8
0.078 0.046 -0.086 9
0.125 0.027 -0.145 8
0.189 0.049 -0.179 9
0.17 0.044 -0.161 8
0.196 0.109 -0.133 8
0.194 0.123 -0.074 9
0.168 0.068 0.01 6
0.111 0.021 0.105 11
0.057 -0.003 0.157 8
0.024 -0.01 0.176 8
0.022 -0.009 0.158 9
0.023 -0.01 0.154 8
0.058 -0.002 0.106 8
0.094 0.019 0.038 9
0.113 0.002 -0.032 8
0.107 -0.045 -0.074 9
0.067 -0.061 -0.081 8
0.06 -0.055 -0.072 8
0.021 -0.075 -0.085 7
-0.012 -0.09 -0.098 10
-0.052 -0.055 -0.089 9
-0.075 -0.015 -0.08 8
-0.073 -0.008 -0.072 8
-0.056 -0.03 -0.043 9
-0.05 -0.027 -0.039 8
-0.028 -0.08 0.004 9
-0.007 -0.135 0.06 8
0.002 -0.162 0.112 8
-0.012 -0.171 0.159 9
-0.037 -0.174 0.204 8
-0.034 -0.156 0.184 7
-0.054 -0.152 0.217 10
-0.059 -0.141 0.222 8
-0.038 -0.131 0.198 9
-0.022 -0.118 0.147 8
-0.028 -0.098 0.075 8
-0.024 -0.082 -0.037 9
-0.021 -0.074 -0.033 8
0.002 -0.064 -0.167 9
0.026 -0.053 -0.227 8
0.042 -0.04 -0.188 8
0.078 -0.033 -0.103 9
0.116 -0.031 -0.027 7
0.118 -0.029 0.02 10
0.106 -0.026 0.018 8
0.058 -0.024 0.048 8
-0.017 -0.023 0.056 9
-0.079 -0.023 0.04 8
-0.1 -0.025 0.016 9
-0.086 -0.024 -0.006 8
-0.043 -0.023 -0.011 8
-0.038 -0.021 -0.009 9
0.02 -0.021 -0.005 8
0.07 -0.02 -0.012 9
0.101 -0.02 -0.031 6
0.102 -0.023 -0.078 10
0.069 -0.028 -0.133 9
0.062 -0.032 -0.161 8
0.056 -0.029 -0.145 9
-0.019 -0.03 -0.138 8
-0.014 -0.039 -0.092 8
0.011 -0.058 -0.024 9
0.034 -0.078 0.07 8
0.037 -0.092 0.166 8
0.033 -0.083 0.15 9
0.009 -0.115 0.2 8
-0.046 -0.155 0.202 7
-0.125 -0.19 0.132 10
-0.185 -0.206 -0.033 8
-0.237 -0.16 -0.302 9
-0.266 -0.074 -0.578 8
-0.24 -0.066 -0.52 9
-0.21 0.004 -0.677 8
-0.163 0.034 -0.712 8
-0.129 -0.037 -0.679 9
-0.105 -0.196 -0.608 8
-0.078 -0.376 -0.533 9
-0.024 -0.555 -0.485 8
-0.022 -0.5 -0.437 7
0.026 -0.613 -0.43 10
0.073 -0.641 -0.511 8
0.165 -0.627 -0.643 8
0.26 -0.598 -0.795 9
0.307 -0.574 -0.97 8
0.31 -0.593 -1.132 9
0.279 -0.534 -1.019 8
0.261 -0.577 -1.24 8
0.224 -0.599 -1.482 9
0.18 -0.611 -1.699 8
0.234 -0.616 -1.76 9
0.211 -0.555 -1.584 6
0.349 -0.591 -1.42 10
0.364 -0.733 -1.282 9
0.276 -0.946 -1.163 8
0.219 -1.13 -0.959 9
0.142 -1.318 -0.778 8
0.039 -1.49 -0.661 8
-0.049 -1.567 -0.702 9
-0.044 -1.411 -0.632 8
-0.157 -1.452 -0.891 9
-0.286 -1.447 -1.198 8
-0.424 -1.309 -1.483 8
-0.568 -1.089 -1.772 7
-0.661 -0.903 -1.92 10
-0.68 -0.774 -2.011 9
-0.612 -0.697 -1.809 8
-0.584 -0.594 -1.901 8
-0.546 -0.521 -1.879 9
-0.532 -0.485 -1.824 8
-0.636 -0.444 -1.74 9
-0.889 -0.377 -1.566 8
-1.11 -0.249 -1.244 8
-0.999 -0.224 -1.119 9
-1.081 -0.046 -0.704 8
-1.017 0.256 -0.18 7
-0.785 0.755 0.493 10
-0.363 1.212 1.072 8
0.24 1.433 1.273 9
0.216 1.29 1.145 8
0.966 1.461 1.182 8
1.741 1.673 1.445 9
2.264 1.668 1.745 8
2.321 1.345 1.797 9
1.925 1.105 1.87 8
1.278 1.242 2.316 8
1.15 1.118 2.084 9
0.58 1.522 2.712 6
0.292 1.902 3.239 11
0.342 2.115 3.722 8
0.63 2.246 4.039 8
1.052 2.357 4.169 9
1.435 2.311 4.246 8
1.291 2.08 3.822 9
1.47 1.899 3.878 8
1.452 1.746 3.838 8
1.332 1.672 3.81 9
1.212 1.672 3.759 8
1.149 1.758 3.569 8
1.034 1.582 3.212 7
0.992 1.763 2.971 10
0.873 1.956 2.821 9
0.709 2.106 2.915 8
0.567 2.135 3.047 8
0.486 2.08 3.012 9
0.591 2.02 2.791 8
0.532 1.818 2.512 9
0.857 1.763 2.121 8
1.192 1.687 1.768 8
1.324 1.596 1.568 9
1.197 1.502 1.278 8
0.877 1.409 0.913 7
0.515 1.328 0.647 10
0.464 1.195 0.583 8
0.284 1.198 0.372 9
0.483 1.269 0.221 8
1.111 1.305 0.144 9
1.877 1.309 0.213 8
2.466 1.166 0.466 8
2.369 1.045 0.553 9
2.132 0.941 0.497 8
1.777 1.35 0.221 8
1.951 1.456 -0.709 9
2.01 1.106 -1.91 7
1.517 0.949 -2.676 10
1.139 0.593 -2.891 8
1.025 -0.08 -2.608 8
1.025 -0.072 -2.347 9
1.042 -0.948 -2.034 8
0.81 -1.856 -1.998 9
-0.046 -2.429 -2.289 8
-1.146 -2.81 -2.778 8
-2.374 -3.217 -3.635 9
-2.136 -2.895 -3.271 8
-3.666 -2.814 -4.47 9
-4.587 -2.337 -5.664 6
-4.467 -1.85 -6.606 10
-3.637 -1.355 -7.02 9
-2.634 -1.037 -6.853 8
-1.872 -0.942 -6.188 9
-1.685 -0.848 -5.569 8
-1.257 -0.97 -4.671 8
-1.128 -1.232 -3.636 9
-1.272 -1.367 -2.532 8
-1.422 -1.19 -1.443 9
-1.265 -0.864 -0.538 8
-0.695 -0.552 -0.08 8
-0.626 -0.496 -0.072 7
0.238 -0.186 -0.082 10
0.951 0.226 -0.423 9
0.78 0.791 -0.757 8
0.353 0.815 -0.763 8
0.265 0.189 -0.631 9
0.238 0.17 -0.567 8
-0.214 -0.062 -0.308 8
-0.962 0.187 0.057 9
-1.505 0.271 0.078 8
-1.758 0.597 -0.096 9
-1.373 1.336 -0.145 8
-1.236 1.202 -0.131 7
0.154 1.18 -0.379 10
1.732 0.594 -0.761 8
2.445 0.257 -0.692 9
2.039 0.298 0.624 8
1.01 0.46 2.498 8
0.175 0.109 3.635 9
-0.533 -0.259 3.755 8
-0.48 -0.233 3.379 9
-0.799 -0.234 2.55 8
-0.13 0.048 1.41 8
0.874 0.352 0.309 9
1.196 0.388 -0.52 6
0.689 0.343 -0.541 11
-0.262 0.585 0.22 8
-0.235 0.527 0.198 8
-0.966 0.775 1.237 9
-1.083 0.519 2.151 8
-0.83 0.13 2.821 8
-0.431 -0.245 3.367 9
-0.134 -0.655 3.857 8
-0.058 -0.934 4.017 9
-0.052 -0.84 3.615 8
-0.1 -0.919 3.277 8
-0.121 -0.871 2.661 7
-0.049 -0.778 1.934 10
0.14 -0.682 1.151 9
0.324 -0.639 0.521 8
0.292 -0.575 0.469 8
0.327 -0.603 0.113 9
0.229 -0.645 -0.06 8
0.152 -0.659 -0.158 9
0.252 -0.62 -0.199 8
0.457 -0.604 -0.407 8
0.619 -0.751 -0.799 9
0.557 -0.675 -0.719 8
0.755 -0.892 -0.888 7
0.869 -1.144 -0.88 10
0.645 -1.394 -1.031 8
0.114 -1.242 -1.116 9
-0.385 -1.161 -0.97 8
-0.753 -1.392 -0.787 8
-0.678 -1.252 -0.708 9
-1.149 -1.106 -0.589 8
-1.643 -0.553 -0.555 9
-1.915 0.032 -0.547 8
-1.825 0.316 -0.573 8
-1.455 0.178 -0.809 9
-1.31 0.161 -0.728 7
-0.941 0.064 -0.888 10
-0.746 0.209 -0.657 8
-0.659 0.314 -0.405 8
-0.556 0.304 -0.346 9
-0.449 0.263 -0.365 8
-0.372 0.25 -0.445 9
-0.334 0.225 -0.401 8
-0.246 0.216 -0.415 8
-0.185 0.236 -0.318 9
-0.191 0.291 -0.244 8
-0.222 0.312 -0.182 9
-0.245 0.29 -0.066 6
-0.23 0.263 0.034 10
-0.207 0.237 0.03 9
-0.155 0.211 0.0 8
-0.093 0.172 -0.079 9
-0.026 0.139 -0.119 8
0.053 0.117 -0.131 8
0.161 0.092 -0.163 9
0.248 0.056 -0.212 8
0.223 0.05 -0.191 9
0.251 0.049 -0.189 8
0.27 0.09 -0.162 8
0.337 0.114 -0.216 7
0.479 0.036 -0.363 10
0.511 0.04 -0.494 8
0.275 0.142 -0.406 9
0.247 0.128 -0.365 8
-0.214 0.127 0.091 9
-0.709 0.143 0.547 8
-0.998 0.167 0.565 8
-1.057 0.201 0.237 9
-0.935 0.337 -0.193 8
-0.705 0.559 -0.571 9
-0.634 0.503 -0.514 8
-0.512 0.725 -0.731 7
-0.428 0.641 -0.707 10
-0.36 0.452 -0.492 8
-0.634 0.656 -0.099 9
-1.119 1.073 0.347 8
-1.007 0.965 0.312 8
-1.307 1.145 0.677 9
-1.226 0.95 0.74 8
-0.83 0.653 0.5 9
-0.42 0.457 0.219 8
-0.153 0.35 -0.037 8
-0.018 0.273 -0.171 9
-0.016 0.246 -0.154 6
0.1 0.014 -0.083 11
0.289 -0.352 0.005 8
0.472 -0.605 0.011 8
0.626 -0.735 0.011 9
0.809 -0.793 -0.01 8
1.102 -0.761 -0.061 8
0.992 -0.685 -0.055 9
1.272 -0.602 -0.129 8
1.485 -0.553 -0.134 9
1.619 -0.523 -0.056 8
1.546 -0.441 0.088 8
1.391 -0.397 0.08 7
1.067 -0.274 0.175 10
0.96 -0.247 0.157 9
0.748 -0.174 -0.045 8
0.478 -0.06 -0.26 8
0.137 0.075 -0.408 9
-0.125 0.134 -0.463 8
-0.236 0.093 -0.472 9
-0.212 0.084 -0.425 8
-0.257 0.11 -0.423 8
-0.302 0.255 -0.403 9
-0.282 0.557 -0.183 8
-0.126 0.952 0.199 7
0.14 1.043 0.302 10
0.417 0.923 0.187 8
0.375 0.831 0.168 9
0.63 0.846 0.159 8
0.842 0.845 0.102 8
0.985 0.671 -0.107 9
1.13 0.452 -0.326 8
1.309 0.229 -0.558 9
1.485 -0.121 -0.821 8
1.337 -0.109 -0.739 8
1.485 -0.497 -0.901 9
1.521 -0.764 -0.872 7
1.399 -0.881 -0.597 10
1.206 -0.975 -0.214 8
1.032 -1.188 0.155 8
0.816 -1.409 0.498 9
0.735 -1.268 0.448 8
0.476 -1.431 0.579 9
0.269 -1.486 0.508 8
0.165 -1.386 0.39 8
0.143 -1.208 0.226 9
0.119 -1.001 0.051 8
0.107 -0.901 0.046 9
0.052 -0.607 -0.033 6
-0.024 -0.268 -0.058 10
-0.129 -0.064 -0.116 9
-0.154 0.08 -0.168 8
-0.044 0.199 -0.192 8
0.158 0.143 -0.261 9
0.142 0.129 -0.235 8
0.446 -0.064 -0.316 9
0.735 -0.296 -0.271 8
0.805 -0.402 -0.132 8
0.614 -0.33 0.158 9
0.388 -0.261 0.522 8
0.349 -0.235 0.469 7
0.254 -0.206 0.58 10
0.172 -0.091 0.539 8
-0.021 0.103 0.548 9
-0.274 0.297 0.658 8
-0.514 0.46 1.092 9
-0.597 0.533 1.822 8
-0.242 0.526 2.562 8
-0.218 0.474 2.306 9
0.55 0.465 2.978 8
1.466 0.428 3.381 9
2.3 0.374 3.404 8
2.78 0.278 3.193 7
2.924 -0.134 2.9 10
2.631 -0.12 2.61 8
2.453 -0.753 2.381 9
1.727 -0.87 2.387 8
0.736 -0.655 2.571 8
-0.029 -0.65 2.61 9
-0.51 -0.511 2.545 8
-0.879 -0.062 2.675 8
-0.791 -0.055 2.408 9
-0.965 0.316 2.552 8
-0.972 0.459 2.479 9
-1.054 0.527 2.345 6
-1.258 0.53 2.197 10
-1.573 0.513 2.169 9
-1.858 0.507 2.33 8
-1.673 0.456 2.097 9
-1.859 0.433 2.23 8
-1.995 0.477 2.183 8
-1.89 0.548 1.995 9
-1.46 0.576 1.583 8
-1.001 0.689 0.998 9
-0.901 0.751 0.325 8
-0.811 0.676 0.292 8
-0.966 0.515 -0.237 7
-1.366 0.159 -0.469 10
-1.797 -0.372 -0.546 9
-2.04 -0.672 -0.531 8
-2.361 -0.839 -0.745 8
-2.125 -0.755 -0.67 9
-2.413 -0.866 -0.918 8
-1.904 -0.656 -0.871 9
-0.778 -0.485 -0.982 8
0.327 -0.469 -1.275 8
0.873 -0.564 -1.561 9
0.678 -0.767 -1.778 8
0.61 -0.69 -1.6 7
-0.181 -0.96 -1.802 10
-1.326 -1.157 -1.971 8
-2.262 -1.075 -1.86 9
-2.811 -0.842 -1.617 8
-2.923 -0.557 -1.451 8
-2.032 -0.318 -1.133 9
-1.829 -0.286 -1.02 8
-0.278 -0.211 -0.758 9
1.093 -0.185 -0.713 8
1.856 -0.288 -0.812 8
1.812 -0.539 -1.173 9
1.63 -0.485 -1.056 6
-0.284 -0.905 -1.843 11
-0.255 -0.815 -1.659 8
-1.512 -0.809 -1.69 8
-2.423 -0.761 -1.57 9
-2.736 -0.742 -1.458 8
-2.393 -0.814 -1.46 9
-1.476 -0.903 -1.534 8
-1.328 -0.813 -1.381 8
-0.12 -0.778 -1.555 9
0.915 -0.755 -1.781 8
1.313 -0.804 -1.841 8
0.932 -0.762 -1.752 7
0.119 -0.758 -1.701 10
-0.682 -0.787 -1.646 9
-0.613 -0.709 -1.481 8
-1.187 -0.684 -1.512 8
-1.573 -0.719 -1.715 9
-1.527 -0.605 -2.064 8
-0.977 -0.314 -2.358 9
-0.171 -0.251 -2.35 8
0.658 -0.355 -2.196 8
0.592 -0.32 -1.976 9
1.148 -0.459 -1.89 8
1.396 -0.751 -1.824 7
1.349 -1.044 -1.695 10
1.027 -1.121 -1.497 8
0.572 -1.119 -1.413 9
0.514 -1.007 -1.412 8
0.101 -0.906 -1.27 9
-0.286 -0.988 -1.177 8
-0.585 -0.81 -1.066 8
-0.63 -0.473 -0.955 9
-0.522 -0.318 -0.899 8
-0.288 -0.471 -1.012 8
-0.259 -0.424 -0.911 9
0.101 -0.452 -1.029 7
0.377 -0.269 -1.012 10
0.47 -0.159 -0.796 8
0.372 -0.165 -0.355 8
0.19 -0.185 0.101 9
0.014 -0.171 0.471 8
0.012 -0.154 0.424 9
-0.17 -0.064 0.715 8
-0.266 0.13 0.878 8
-0.186 0.346 0.928 9
-0.001 0.499 0.889 8
0.173 0.66 0.765 9
0.155 0.594 0.689 6
0.314 0.83 0.474 10
0.412 1.029 0.237 9
0.346 1.172 0.106 8
0.12 1.313 0.143 9
-0.248 1.459 0.282 8
-0.632 1.589 0.403 8
-0.568 1.43 0.362 9
-0.774 1.542 0.326 8
-0.767 1.666 0.435 9
-0.489 1.77 0.41 8
-0.106 1.811 0.38 8
0.14 1.815 0.406 7
0.226 1.776 0.569 10
0.203 1.598 0.512 8
0.077 1.518 0.777 9
-0.238 1.402 0.977 8
-0.524 1.28 1.051 9
-0.662 1.172 1.038 8
-0.687 1.068 0.959 8
-0.524 0.947 0.833 9
-0.472 0.852 0.75 8
-0.032 0.718 0.565 9
0.517 0.568 0.368 8
0.899 0.434 0.293 7
1.017 0.313 0.352 10
0.912 0.194 0.445 8
0.661 0.1 0.566 9
0.595 0.09 0.509 8
0.336 0.0 0.69 8
0.173 -0.11 0.874 9
0.099 -0.172 1.005 8
0.182 -0.16 1.052 9
0.39 -0.06 1.03 8
0.351 -0.054 0.929 8
0.609 -0.048 0.836 9
0.919 0.086 0.711 6
1.135 0.085 0.589 11
1.107 0.119 0.506 8
0.856 0.156 0.526 8
0.539 0.171 0.597 9
0.485 0.154 0.537 8
0.241 0.113 0.595 8
0.058 0.019 0.674 9
-0.101 -0.117 0.769 8
-0.224 -0.251 0.789 9
-0.298 -0.309 0.697 8
-0.319 -0.253 0.506 8
-0.287 -0.228 0.455 7
-0.216 -0.144 0.206 10
-0.137 -0.098 -0.077 9
-0.182 -0.047 -0.268 8
-0.302 -0.003 -0.319 8
# end
#Thu Feb 26 20:37:37 GMT+08:00 20150
