# Supplementary material for: Abnormal Gait Behavior Detection for Elderly Based on Enhanced Wigner-Ville Analysis and Cloud Incremental SVM Learning
Source: Hindawi journal article supplement (doi:10.1155/2016/5869238), 2016-01-01
Supplement: f1 [file 5869238.f1.zip › Supplementary Materials/Original Data/Backward fall With recovery/original__109.txt]

# Accelerometer Values
# filename:  original__109.txt
# Saving start time: Thu Feb 26 20:37:39 GMT+08:00 2015

# sensor resolution: 0.0095825195m/s^2
#Sensorvendor: KIONIX, name: KX023 Accelerometer, type: 1,version : 1, range 39.240005

# X value, Y value, Z value, time diff in ms
-0.546 -0.216 0.238 9
-0.553 -0.159 0.038 8
-0.476 -0.029 -0.233 7
-0.306 0.081 -0.51 10
-0.066 0.125 -0.688 8
-0.059 0.113 -0.62 9
0.133 0.117 -0.65 8
0.185 0.079 -0.514 8
0.11 0.002 -0.257 9
0.0 -0.094 0.002 8
-0.098 -0.168 0.192 9
-0.178 -0.212 0.308 8
-0.16 -0.191 0.277 8
-0.194 -0.231 0.329 9
-0.165 -0.249 0.325 6
-0.099 -0.242 0.279 11
-0.028 -0.218 0.206 8
0.058 -0.192 0.089 8
0.154 -0.15 -0.058 9
0.139 -0.135 -0.052 8
0.168 -0.085 -0.154 9
0.11 -0.045 -0.187 8
0.017 -0.007 -0.18 8
-0.054 0.011 -0.151 9
-0.085 0.025 -0.11 8
-0.076 0.022 -0.099 8
-0.063 0.05 -0.06 7
0.0 0.084 -0.027 10
0.074 0.139 0.012 9
0.13 0.17 0.036 8
0.154 0.134 0.036 8
0.13 0.068 0.033 9
0.117 0.061 0.03 8
0.073 0.04 0.027 9
0.06 0.068 -0.012 8
0.087 0.096 -0.063 8
0.112 0.096 -0.058 9
0.111 0.082 0.005 8
0.1 0.074 0.004 7
0.11 0.046 0.093 10
0.15 -0.002 0.189 8
0.192 -0.063 0.26 9
0.223 -0.127 0.291 8
0.235 -0.162 0.301 9
0.221 -0.154 0.305 8
0.199 -0.13 0.281 8
0.179 -0.117 0.253 9
0.126 -0.101 0.201 8
0.058 -0.089 0.135 8
-0.029 -0.076 0.053 9
-0.118 -0.049 -0.028 7
-0.168 -0.022 -0.088 10
-0.151 -0.02 -0.079 8
-0.138 -0.013 -0.114 8
-0.079 -0.018 -0.112 9
-0.014 -0.021 -0.075 8
0.043 -0.018 -0.022 9
0.096 0.003 0.012 8
0.137 0.027 -0.003 8
0.124 0.024 -0.003 9
0.149 0.021 -0.085 8
0.144 0.042 -0.189 9
0.103 0.095 -0.256 6
0.036 0.134 -0.256 10
-0.035 0.138 -0.215 9
-0.081 0.111 -0.166 8
-0.073 0.1 -0.149 9
-0.089 0.062 -0.088 8
-0.069 0.019 -0.031 8
-0.018 -0.013 -0.023 9
0.036 -0.03 -0.04 8
0.074 -0.057 -0.062 9
0.088 -0.089 -0.102 8
0.079 -0.08 -0.092 8
0.057 -0.1 -0.131 7
-0.005 -0.098 -0.153 10
-0.099 -0.027 -0.147 8
-0.153 0.082 -0.132 9
-0.137 0.168 -0.135 8
-0.123 0.151 -0.121 9
-0.085 0.185 -0.098 8
-0.048 0.161 -0.042 8
0.0 0.124 0.003 9
0.063 0.06 0.043 8
0.123 -0.043 0.074 9
0.157 -0.118 0.108 8
0.141 -0.106 0.098 7
0.133 -0.124 0.157 10
0.098 -0.11 0.216 8
0.047 -0.091 0.255 9
-0.027 -0.093 0.281 8
-0.116 -0.097 0.289 8
-0.178 -0.091 0.263 9
-0.16 -0.082 0.237 8
-0.177 -0.08 0.156 9
-0.129 -0.058 0.011 8
-0.018 -0.028 -0.132 8
0.094 0.007 -0.203 9
0.085 0.006 -0.183 6
0.154 0.059 -0.07 11
0.138 0.053 -0.063 8
0.133 0.027 0.088 8
0.07 -0.013 0.192 9
0.005 -0.066 0.235 8
-0.04 -0.108 0.232 9
-0.041 -0.13 0.177 8
-0.037 -0.117 0.159 8
0.004 -0.128 0.067 9
0.056 -0.126 -0.047 8
0.096 -0.108 -0.151 8
0.135 -0.086 -0.219 7
0.173 -0.066 -0.255 10
0.181 -0.046 -0.248 9
0.163 -0.042 -0.223 8
0.114 -0.015 -0.18 8
0.03 0.006 -0.091 9
-0.053 0.0 0.016 8
-0.101 -0.014 0.104 9
-0.097 -0.026 0.168 8
-0.047 -0.028 0.195 8
-0.042 -0.025 0.176 9
0.029 -0.022 0.172 8
0.087 -0.024 0.147 7
0.11 -0.022 0.115 10
0.1 -0.011 0.075 8
0.055 0.004 0.021 9
-0.04 0.037 -0.022 8
-0.036 0.033 -0.02 8
-0.161 0.08 -0.064 9
-0.256 0.126 -0.121 8
-0.297 0.175 -0.166 9
-0.287 0.2 -0.192 8
-0.252 0.201 -0.21 8
-0.227 0.181 -0.189 9
-0.214 0.228 -0.205 7
-0.231 0.303 -0.223 10
-0.276 0.34 -0.24 8
-0.362 0.339 -0.213 8
-0.473 0.287 -0.065 9
-0.527 0.132 0.156 8
-0.474 0.119 0.141 9
-0.456 -0.089 0.282 8
-0.435 -0.255 0.317 8
-0.431 -0.355 0.264 9
-0.42 -0.431 0.037 8
-0.396 -0.482 -0.37 9
-0.356 -0.434 -0.333 6
-0.322 -0.437 -0.878 10
-0.232 -0.364 -1.277 9
-0.077 -0.218 -1.357 8
0.105 -0.055 -1.128 9
0.154 0.009 -0.885 8
0.0 -0.009 -0.916 8
0.152 -0.462 -1.036 9
0.137 -0.416 -0.933 8
0.471 -1.008 -1.035 9
0.702 -1.057 -1.159 8
1.014 -0.81 -1.224 8
1.233 -0.502 -1.069 7
1.252 -0.326 -0.916 10
1.127 -0.293 -0.824 8
0.917 -0.356 -0.902 9
0.458 -0.492 -1.077 8
-0.115 -0.597 -1.28 9
-0.578 -0.691 -1.532 8
-0.841 -0.718 -1.735 8
-1.025 -0.59 -1.746 9
-0.922 -0.531 -1.571 8
-1.033 -0.225 -1.346 9
-0.943 0.04 -1.065 8
-0.643 -0.128 -0.801 7
-0.156 -0.864 -0.569 10
0.263 -1.573 -0.593 8
0.36 -1.796 -0.821 9
0.324 -1.617 -0.739 8
0.189 -1.585 -0.912 8
0.103 -1.378 -0.903 9
0.109 -1.301 -0.867 8
-0.096 -1.42 -0.928 8
-0.486 -1.405 -0.896 9
-0.765 -1.411 -0.756 8
-0.688 -1.27 -0.681 9
-0.86 -1.307 -0.502 6
-0.96 -1.138 -0.234 10
-0.905 -0.872 -0.125 9
-0.764 -0.634 -0.229 8
-0.5 -0.356 -0.186 9
-0.45 -0.32 -0.167 8
-0.027 -0.031 0.254 8
0.382 0.257 0.909 9
0.628 0.502 1.4 8
0.742 0.466 1.448 9
0.815 0.407 1.287 8
0.773 0.746 1.099 8
0.696 0.672 0.989 7
0.388 1.26 0.962 10
0.063 1.679 1.16 9
0.103 1.902 1.28 8
0.329 2.133 1.346 8
0.504 2.365 1.435 9
0.657 2.515 1.486 8
0.591 2.263 1.337 9
0.639 2.33 1.356 8
0.515 2.412 1.374 8
0.373 2.538 1.252 9
0.342 2.617 0.943 8
0.509 2.691 0.74 7
1.012 2.774 0.88 10
0.911 2.497 0.792 8
1.527 2.562 1.177 9
1.89 2.672 1.547 8
1.946 2.783 1.765 8
1.836 2.76 1.878 9
1.86 2.644 1.878 8
1.674 2.38 1.69 9
1.942 2.246 1.388 8
2.199 2.225 0.968 8
2.233 2.305 0.792 9
2.029 2.352 0.803 7
1.717 2.372 0.991 10
1.412 2.234 1.261 8
1.271 2.01 1.135 8
0.882 1.917 1.418 9
0.512 1.935 1.707 8
0.486 1.921 1.89 9
0.849 1.971 1.723 8
1.297 1.91 1.179 8
1.459 1.78 0.864 9
1.313 1.602 0.777 8
1.186 1.499 0.928 8
0.854 1.057 1.144 7
0.312 0.562 1.249 10
-0.26 0.317 1.16 9
-0.622 0.097 0.905 8
-0.56 -0.167 0.531 8
-0.504 -0.15 0.478 9
-0.654 -0.304 -0.143 8
-0.288 -0.595 -1.006 9
0.104 -0.596 -1.762 8
0.716 0.204 -2.147 8
1.958 1.079 -2.4 9
1.762 0.971 -2.16 8
2.925 1.446 -2.128 7
3.392 1.37 -1.79 10
3.232 0.567 -1.33 8
2.595 -0.908 -0.676 9
1.236 -2.319 -0.194 8
-0.684 -3.069 -0.049 9
-0.616 -2.762 -0.044 8
-1.921 -3.127 -0.669 8
-2.175 -3.242 -2.237 9
-2.02 -2.997 -4.019 8
-1.847 -2.431 -5.314 9
-1.643 -1.809 -5.726 8
-1.479 -1.628 -5.154 7
-1.148 -1.241 -4.54 10
-0.867 -1.033 -3.175 8
-0.811 -0.968 -1.768 9
-0.77 -1.194 -0.812 8
-0.836 -1.587 -0.425 8
-1.2 -1.819 -0.437 9
-1.08 -1.637 -0.393 8
-1.583 -1.523 -0.598 8
-1.965 -1.154 -0.95 9
-2.136 -0.652 -1.518 8
-2.009 -0.14 -2.166 9
-1.749 0.059 -2.814 6
-1.493 -0.014 -3.243 10
-1.343 -0.013 -2.918 9
-0.923 0.011 -2.69 8
-0.033 0.054 -1.571 9
0.573 -0.2 -0.318 8
0.543 -0.496 0.589 8
0.364 -0.589 1.396 9
-0.055 -0.482 1.959 8
-0.049 -0.434 1.763 9
-0.694 -0.035 1.885 8
-1.088 0.177 1.616 8
-0.956 0.02 1.296 7
-0.713 -0.014 1.27 10
-0.486 0.129 1.417 9
-0.143 0.167 1.295 8
-0.128 0.15 1.165 8
0.088 0.204 0.815 9
-0.007 0.381 0.399 8
-0.292 0.396 -0.1 8
-0.677 0.483 -0.267 9
-0.817 0.697 0.327 8
-0.736 0.627 0.294 9
-0.882 0.719 0.916 8
-1.058 0.644 1.371 7
-1.151 0.742 2.143 10
-1.342 1.345 2.904 8
-1.134 1.571 3.325 9
-0.441 0.799 3.575 8
-0.397 0.719 3.218 8
0.381 -0.38 3.465 9
0.821 -1.147 3.482 8
0.756 -1.34 3.252 9
0.45 -1.104 2.734 8
0.114 -0.718 1.944 8
0.026 -0.478 1.187 9
0.023 -0.43 1.068 6
-0.002 -0.491 0.615 11
-0.235 -0.551 0.363 8
-0.453 -0.466 0.173 8
-0.603 -0.387 0.059 9
-0.527 -0.394 0.045 8
-0.135 -0.526 -0.089 9
-0.122 -0.473 -0.08 8
0.285 -0.634 -0.448 8
0.536 -0.702 -0.886 9
0.717 -0.622 -1.182 8
0.659 -0.536 -1.325 8
0.593 -0.482 -1.193 7
-0.463 -0.344 -1.444 10
-0.417 -0.309 -1.3 9
-0.726 -0.384 -1.061 8
-0.83 -0.454 -0.833 8
-1.041 -0.182 -0.734 9
-1.23 0.256 -0.705 8
-1.255 0.596 -0.76 9
-1.129 0.536 -0.684 8
-0.766 0.619 -0.781 8
-0.121 0.485 -0.87 9
0.458 0.387 -1.104 8
0.928 0.457 -1.201 7
1.284 0.555 -0.803 10
1.292 0.528 -0.274 8
1.163 0.475 -0.246 9
0.911 0.36 0.2 8
0.716 0.121 0.699 9
0.698 -0.202 1.025 8
0.805 -0.444 1.088 8
0.946 -0.546 1.076 9
1.091 -0.555 1.005 8
0.982 -0.499 0.905 8
1.084 -0.503 0.63 9
1.062 -0.482 0.26 7
0.944 -0.405 0.007 10
0.821 -0.349 -0.155 8
0.685 -0.34 -0.215 8
0.494 -0.339 -0.15 9
0.444 -0.305 -0.135 8
0.263 -0.326 -0.031 9
0.188 -0.378 0.042 8
0.25 -0.414 0.054 8
0.372 -0.365 -0.054 9
0.442 -0.297 -0.415 8
0.398 -0.214 -0.888 9
0.358 -0.192 -0.799 6
0.3 -0.03 -1.143 10
0.137 0.121 -1.347 9
-0.099 0.21 -1.46 8
-0.366 0.309 -1.589 9
-0.535 0.45 -1.76 8
-0.481 0.405 -1.584 8
-0.489 0.512 -1.726 9
-0.353 0.481 -1.686 8
-0.185 0.347 -1.387 9
-0.049 0.236 -0.947 8
0.031 0.151 -0.49 8
0.028 0.136 -0.441 7
0.021 0.055 -0.014 10
-0.091 0.015 0.308 8
-0.234 0.014 0.516 9
-0.301 0.007 0.786 8
-0.145 -0.043 1.117 9
0.262 -0.119 1.296 8
0.827 -0.211 1.306 8
0.745 -0.189 1.175 9
1.271 -0.31 1.09 8
1.493 -0.48 0.857 9
1.372 -0.633 0.55 8
1.004 -0.736 0.303 7
0.609 -0.887 0.035 10
0.371 -1.026 -0.426 8
0.334 -0.923 -0.383 9
0.203 -0.902 -1.022 8
0.269 -0.709 -1.467 8
0.637 -0.596 -1.395 9
1.022 -0.792 -0.985 8
0.981 -1.051 -0.513 9
0.883 -0.946 0.028 8
0.385 -0.851 0.025 8
-0.206 -0.633 0.848 9
-0.553 -0.469 1.758 6
-0.536 -0.399 2.186 11
-0.234 -0.322 2.072 8
0.257 -0.277 1.621 8
0.232 -0.249 1.459 9
0.713 -0.403 0.886 8
0.805 -0.541 0.275 8
0.38 -0.408 -0.225 9
-0.155 -0.193 -0.396 8
-0.393 -0.025 -0.24 9
-0.183 0.162 0.06 8
-0.165 0.146 0.054 8
0.303 0.299 0.266 7
0.846 0.424 0.439 10
1.478 0.422 0.732 9
2.028 0.179 0.962 8
2.411 -0.067 1.059 8
2.65 -0.257 1.234 9
2.385 -0.231 1.11 8
2.441 -0.479 1.448 9
2.169 -0.523 1.81 8
1.629 -0.164 2.114 8
1.171 0.284 2.228 9
0.919 0.634 1.978 8
0.827 0.57 1.78 7
0.666 0.869 1.382 10
0.493 1.091 1.064 8
0.239 1.226 1.042 9
-0.089 1.311 1.225 8
-0.355 1.318 1.495 8
-0.465 1.27 1.89 9
-0.419 1.143 1.701 8
-0.364 1.123 2.083 9
-0.24 1.102 2.277 8
-0.261 1.128 2.316 8
-0.516 1.175 2.291 9
-0.853 1.211 2.218 7
-1.115 1.199 2.125 10
-1.004 1.079 1.913 8
-1.08 0.989 1.975 8
-0.912 0.777 2.271 9
-0.646 0.479 2.573 8
-0.429 0.064 2.715 9
-0.544 -0.353 2.578 8
-1.066 -0.573 2.219 8
-0.959 -0.516 1.997 9
-1.653 -0.66 1.638 8
-2.33 -0.838 1.337 9
-2.754 -1.101 1.175 6
-2.722 -1.416 1.064 10
-2.31 -1.76 0.963 9
-1.767 -2.072 0.772 8
-1.591 -1.865 0.695 9
-1.198 -2.101 0.232 8
-1.146 -2.366 -0.237 8
-1.625 -2.357 -0.428 9
-2.236 -2.04 -0.484 8
-2.459 -1.692 -0.617 8
-2.213 -1.522 -0.85 9
-2.002 -1.37 -0.765 8
-1.21 -0.813 -1.037 7
0.027 -0.433 -1.443 10
1.197 -0.115 -2.061 8
1.815 -0.108 -2.724 9
1.72 -0.36 -3.242 8
1.548 -0.324 -2.917 9
0.779 -0.714 -3.235 8
-0.387 -1.213 -3.214 8
-1.357 -1.682 -2.886 9
-1.942 -1.996 -2.649 8
-2.596 -1.968 -2.772 9
-3.268 -1.459 -2.841 8
-2.941 -1.313 -2.557 7
-2.684 -0.977 -2.369 10
-1.46 -1.113 -2.157 8
-0.35 -1.129 -2.078 9
0.18 -1.03 -2.153 8
0.175 -1.07 -2.045 8
-0.26 -1.076 -1.512 9
-0.234 -0.969 -1.361 8
-0.837 -0.893 -0.783 9
-1.267 -0.698 -0.48 8
-1.363 -0.391 -0.439 8
-1.108 -0.087 -0.569 9
-0.998 0.139 -0.76 6
0.34 0.288 -0.976 10
0.306 0.259 -0.878 9
1.056 0.367 -1.19 8
1.442 0.539 -1.607 9
1.578 0.53 -1.9 8
1.605 0.054 -1.911 8
1.2 -0.454 -1.817 9
1.08 -0.408 -1.635 8
0.292 -0.57 -1.351 9
-0.453 -0.618 -0.914 8
-1.043 -0.683 -0.622 8
-1.443 -0.683 -0.442 7
-1.416 -0.645 -0.192 10
-1.066 -0.568 0.027 9
-0.959 -0.511 0.025 8
-0.485 -0.32 -0.012 8
0.029 -0.034 -0.168 9
0.326 0.233 -0.267 8
0.334 0.438 -0.297 8
0.095 0.474 -0.257 9
-0.271 0.311 -0.111 8
-0.244 0.28 -0.1 9
-0.635 -0.004 0.073 8
-0.908 -0.283 0.247 7
-0.917 -0.438 0.466 10
-0.752 -0.482 0.614 8
-0.548 -0.46 0.645 9
-0.369 -0.34 0.617 8
-0.332 -0.306 0.555 8
-0.21 -0.04 0.509 9
-0.124 0.302 0.448 8
-0.065 0.608 0.288 9
-0.04 0.865 -0.047 8
-0.067 1.102 -0.4 8
-0.061 1.25 -0.702 9
-0.055 1.125 -0.632 7
-0.136 1.183 -0.818 10
-0.167 1.298 -0.749 8
-0.229 1.441 -0.67 8
-0.244 1.51 -0.622 9
-0.285 1.562 -0.457 8
-0.256 1.405 -0.412 9
-0.282 1.422 -0.247 8
-0.193 1.406 -0.145 8
-0.075 1.415 -0.086 9
0.039 1.441 -0.003 8
0.08 1.46 0.158 9
0.072 1.314 0.142 6
0.042 1.331 0.345 10
0.01 1.327 0.554 9
-0.028 1.327 0.698 8
-0.041 1.296 0.749 8
-0.025 1.21 0.803 9
0.015 1.105 0.888 8
0.19 0.984 0.863 9
0.171 0.886 0.777 8
0.447 0.76 0.636 8
0.649 0.627 0.508 9
0.75 0.513 0.424 8
0.762 0.427 0.351 7
0.683 0.308 0.344 10
0.614 0.277 0.309 8
0.445 0.105 0.278 9
0.228 -0.07 0.658 8
0.086 -0.215 0.744 9
0.085 -0.316 0.649 8
0.215 -0.376 0.494 8
0.327 -0.386 0.527 9
0.294 -0.347 0.474 8
0.323 -0.321 0.572 9
0.32 -0.289 0.545 8
0.253 -0.253 0.472 7
0.099 -0.227 0.391 10
-0.127 -0.207 0.313 8
-0.318 -0.179 0.235 8
-0.286 -0.161 0.211 9
-0.31 -0.104 0.043 8
-0.172 -0.016 -0.175 9
0.027 0.064 -0.302 8
0.191 0.07 -0.222 8
0.209 -0.004 0.05 9
0.09 -0.084 0.329 8
0.081 -0.076 0.296 9
-0.122 -0.131 0.476 6
-0.311 -0.148 0.51 10
-0.37 -0.152 0.458 9
-0.324 -0.15 0.38 8
-0.192 -0.124 0.252 9
0.016 -0.083 0.082 8
0.015 -0.074 0.073 8
0.236 -0.024 -0.146 9
0.406 0.015 -0.37 8
0.465 0.019 -0.476 9
0.397 -0.011 -0.371 8
0.257 -0.046 -0.098 8
0.231 -0.042 -0.088 7
0.075 -0.067 0.194 10
-0.055 -0.103 0.397 8
-0.13 -0.145 0.512 9
-0.101 -0.166 0.602 8
0.056 -0.186 0.681 9
0.243 -0.213 0.734 8
0.219 -0.192 0.661 8
0.345 -0.236 0.715 9
0.38 -0.288 0.714 8
0.328 -0.291 0.645 9
0.21 -0.252 0.557 8
-0.01 -0.197 0.47 7
-0.254 -0.197 0.413 10
-0.229 -0.177 0.371 8
-0.381 -0.236 0.353 9
-0.386 -0.269 0.381 8
-0.208 -0.276 0.331 8
0.042 -0.24 0.114 9
0.176 -0.105 -0.117 8
0.131 0.071 -0.276 9
0.118 0.064 -0.248 8
-0.027 0.164 -0.318 8
-0.163 0.182 -0.275 9
-0.202 0.148 -0.174 6
-0.067 0.032 -0.072 11
0.084 0.016 -0.002 8
0.076 0.014 -0.002 8
0.161 0.107 0.088 9
0.268 0.092 0.116 8
0.349 0.009 0.028 8
0.26 0.027 -0.074 9
-0.019 0.131 -0.169 8
-0.317 0.165 -0.193 9
-0.285 0.149 -0.174 8
-0.475 0.135 -0.15 8
-0.527 0.103 -0.109 7
-0.425 0.056 -0.071 10
-0.207 0.03 -0.07 9
0.031 0.051 -0.13 8
0.213 0.083 -0.307 8
0.192 0.075 -0.276 9
0.347 0.036 -0.474 8
0.319 0.093 -0.674 9
-0.027 0.296 -0.745 8
-0.362 0.29 -0.48 8
-0.503 0.126 -0.18 9
-0.452 -0.021 -0.015 8
-0.407 -0.019 -0.014 7
-0.311 -0.159 0.098 10
-0.096 -0.215 0.161 8
0.115 -0.157 0.187 9
0.249 -0.058 0.182 8
0.246 0.005 0.181 8
0.221 0.005 0.163 9
0.052 0.024 0.321 8
-0.243 0.1 0.48 9
-0.431 0.137 0.421 8
-0.429 0.09 0.284 8
-0.254 0.093 0.143 9
-0.229 0.084 0.129 7
0.082 0.109 -0.028 10
0.345 0.149 -0.131 8
0.463 0.196 -0.103 8
0.467 0.228 0.001 9
0.368 0.229 0.122 8
0.175 0.139 0.336 9
-0.075 0.024 0.514 8
-0.067 0.021 0.463 8
-0.29 -0.043 0.438 9
-0.401 -0.079 0.328 8
-0.438 -0.081 0.203 9
-0.407 -0.089 0.067 6
-0.313 -0.127 -0.045 10
# end
#Thu Feb 26 20:37:44 GMT+08:00 20150
