# Supplementary material for: Abnormal Gait Behavior Detection for Elderly Based on Enhanced Wigner-Ville Analysis and Cloud Incremental SVM Learning
Source: Hindawi journal article supplement (doi:10.1155/2016/5869238), 2016-01-01
Supplement: f1 [file 5869238.f1.zip › Supplementary Materials/Original Data/Backward fall With recovery/original__110.txt]

# Accelerometer Values
# filename:  original__110.txt
# Saving start time: Thu Feb 26 20:37:46 GMT+08:00 2015

# sensor resolution: 0.0095825195m/s^2
#Sensorvendor: KIONIX, name: KX023 Accelerometer, type: 1,version : 1, range 39.240005

# X value, Y value, Z value, time diff in ms
-0.243 0.009 -0.4 8
-0.13 0.019 -0.474 8
-0.117 0.017 -0.426 9
0.013 0.025 -0.416 7
0.077 0.031 -0.317 10
0.04 0.027 -0.183 8
-0.071 0.01 -0.057 8
-0.203 -0.019 0.046 9
-0.293 -0.062 0.127 8
-0.264 -0.056 0.115 9
-0.303 -0.105 0.156 8
-0.305 -0.161 0.143 8
-0.282 -0.163 0.098 9
-0.242 -0.095 0.032 8
-0.216 -0.029 -0.041 9
-0.194 -0.026 -0.037 6
-0.19 0.011 -0.081 10
-0.176 0.028 -0.07 9
-0.142 0.047 -0.025 8
-0.093 0.064 0.017 9
-0.065 0.064 0.046 8
-0.079 0.057 0.08 8
-0.1 0.045 0.103 9
-0.09 0.041 0.093 8
-0.099 0.019 0.093 9
-0.098 0.001 0.07 8
-0.091 -0.001 0.024 8
-0.082 0.0 -0.015 7
-0.073 0.0 -0.027 10
-0.065 0.0 -0.025 9
-0.026 0.01 -0.029 8
0.08 0.022 -0.042 8
0.151 0.025 -0.082 9
0.09 0.019 -0.149 8
-0.033 0.009 -0.178 8
-0.242 -0.002 -0.136 9
-0.218 -0.002 -0.122 8
-0.459 -0.027 -0.059 9
-0.584 -0.079 -0.015 8
-0.607 -0.159 -0.001 7
-0.55 -0.221 -0.018 10
-0.396 -0.239 -0.042 8
-0.183 -0.232 -0.045 9
-0.165 -0.209 -0.041 8
-0.015 -0.206 -0.016 8
-0.042 -0.214 0.023 9
-0.203 -0.225 0.073 8
-0.358 -0.234 0.106 9
-0.476 -0.253 0.099 8
-0.561 -0.278 0.029 8
-0.505 -0.25 0.026 9
-0.546 -0.262 -0.12 6
-0.542 -0.258 -0.342 11
-0.492 -0.333 -0.566 8
-0.412 -0.319 -0.802 8
-0.27 -0.137 -1.09 9
-0.243 -0.123 -0.981 8
0.059 -0.118 -1.194 8
0.348 -0.199 -1.307 9
0.459 -0.213 -1.362 8
0.428 -0.259 -1.332 9
0.258 -0.277 -1.269 8
0.074 -0.298 -1.233 8
0.067 -0.268 -1.109 7
-0.006 -0.329 -1.158 10
0.059 -0.372 -1.293 9
0.215 -0.378 -1.452 8
0.351 -0.378 -1.608 8
0.439 -0.441 -1.704 9
0.531 -0.603 -1.642 8
0.478 -0.542 -1.477 9
0.551 -0.743 -1.302 8
0.534 -0.904 -1.082 8
0.444 -1.069 -0.911 9
0.372 -1.256 -0.851 8
0.335 -1.13 -0.766 7
0.703 -1.362 -0.895 10
0.633 -1.226 -0.806 8
0.656 -1.561 -1.075 9
0.738 -1.681 -1.097 8
0.834 -1.505 -0.803 9
0.904 -1.347 -0.404 8
0.916 -1.371 -0.132 8
0.824 -1.234 -0.118 9
0.722 -1.385 -0.079 8
0.479 -1.463 -0.266 8
0.102 -1.425 -0.558 9
-0.248 -1.324 -0.746 7
-0.412 -1.063 -0.516 10
-0.366 -0.697 0.056 8
-0.329 -0.627 0.051 8
-0.087 -0.391 0.537 9
0.311 -0.275 0.755 8
0.811 -0.142 0.785 9
1.312 0.035 0.744 8
1.76 0.276 0.713 8
2.191 0.543 0.769 9
1.972 0.489 0.692 8
2.263 0.757 0.88 9
1.956 1.068 1.072 6
1.135 1.386 1.254 10
0.286 1.598 1.552 9
-0.313 1.763 1.688 8
-0.408 1.962 1.487 9
-0.367 1.766 1.338 8
0.003 2.006 1.1 8
0.507 2.294 0.929 9
0.873 2.521 0.851 8
0.965 2.55 1.065 9
0.702 2.43 1.566 8
0.632 2.187 1.409 8
0.142 2.083 2.034 7
-0.273 2.027 2.559 10
-0.337 1.92 2.747 8
-0.109 1.758 2.585 9
0.261 1.737 2.316 8
0.716 1.853 2.168 9
0.644 1.668 1.952 8
1.129 1.712 1.877 8
1.48 1.578 2.047 9
1.477 1.381 2.643 8
1.198 1.155 3.403 9
0.934 0.912 4.045 8
0.841 0.821 3.641 7
0.939 0.608 3.959 10
1.415 0.404 3.689 8
1.989 0.316 2.813 9
2.337 0.432 1.727 8
2.198 0.605 0.945 8
1.725 0.564 0.733 9
1.158 0.325 1.054 8
1.042 0.292 0.948 8
0.562 0.058 1.597 9
0.396 -0.095 2.274 8
0.547 -0.164 2.851 9
0.738 -0.176 3.288 6
0.788 -0.141 3.289 10
0.709 -0.127 2.96 9
0.609 -0.003 2.446 8
0.316 0.175 1.612 9
-0.022 0.246 0.555 8
-0.353 0.344 -0.677 8
-0.643 0.58 -2.016 9
-0.801 0.639 -3.277 8
-0.721 0.575 -2.949 9
-0.937 0.426 -3.795 8
-0.967 0.178 -3.651 8
-0.433 -0.161 -2.59 7
0.237 -0.474 -1.145 10
0.591 -0.693 0.162 9
0.651 -0.835 0.655 8
0.586 -0.752 0.59 8
0.456 -0.766 0.24 9
0.179 -0.758 -0.62 8
-0.359 -0.805 -1.715 9
-1.165 -0.755 -2.578 8
-1.946 -0.519 -2.884 8
-2.4 -0.176 -2.559 9
-2.16 -0.158 -2.303 8
-2.091 0.041 -1.551 7
-1.55 -0.026 -0.764 10
-0.857 -0.328 -0.176 8
-0.236 -0.742 -0.001 9
0.095 -1.174 -0.418 8
0.086 -1.057 -1.292 8
-0.083 -0.951 -1.163 9
-0.566 -1.462 -2.208 8
-0.843 -1.249 -2.998 9
-0.616 -0.879 -3.283 8
-0.078 -0.604 -3.2 8
0.501 -0.356 -2.961 9
0.451 -0.32 -2.665 7
0.748 0.082 -2.417 10
0.546 0.484 -2.182 8
0.245 0.745 -1.831 8
0.12 0.883 -1.4 9
-0.001 0.858 -1.276 8
-0.09 0.791 -1.407 9
-0.081 0.712 -1.266 8
0.015 0.769 -1.48 8
0.144 0.758 -1.803 9
0.055 0.631 -1.975 8
-0.397 0.536 -1.733 9
-0.984 0.377 -1.154 6
-1.482 0.214 -0.497 10
-1.334 0.192 -0.447 9
-1.849 0.293 -0.025 8
-2.238 0.679 0.176 9
-2.185 0.996 0.308 8
-1.647 0.866 0.093 8
-0.892 0.554 -0.441 9
-0.202 0.361 -1.087 8
-0.181 0.325 -0.978 8
0.258 0.239 -1.591 9
0.438 0.152 -1.888 8
0.31 0.018 -1.906 7
-0.214 0.036 -1.644 10
-0.949 0.151 -1.061 8
-0.854 0.135 -0.954 9
-1.642 0.384 -0.232 8
-2.433 0.932 0.56 9
-2.833 1.492 1.444 8
-2.286 1.44 2.145 8
-1.175 0.939 2.435 9
-0.281 0.583 2.547 8
-0.253 0.525 2.292 9
0.339 0.221 2.369 8
0.74 -0.133 2.178 7
0.933 -0.42 1.728 10
0.897 -0.57 1.049 8
0.712 -0.53 0.25 9
0.546 -0.311 -0.402 8
0.491 -0.28 -0.362 8
0.406 -0.119 -0.756 9
0.344 -0.045 -0.888 8
0.272 0.019 -0.869 8
0.234 -0.022 -0.748 9
0.265 -0.099 -0.517 8
0.38 -0.144 -0.274 9
0.342 -0.13 -0.247 6
0.433 -0.136 -0.148 10
0.525 -0.142 -0.181 9
0.767 -0.206 -0.299 8
0.979 -0.275 -0.459 9
0.945 -0.3 -0.595 8
0.851 -0.27 -0.535 8
0.539 -0.289 -0.655 9
0.057 -0.305 -0.705 8
-0.408 -0.324 -0.653 9
-0.783 -0.341 -0.503 8
-1.001 -0.338 -0.303 8
-0.901 -0.304 -0.273 7
-0.866 -0.284 -0.064 10
-0.635 -0.252 0.13 9
-0.257 -0.191 0.242 8
0.254 -0.108 0.17 8
0.719 -0.034 -0.004 9
0.993 -0.021 -0.144 8
0.88 0.138 -0.181 9
0.792 0.124 -0.163 8
0.469 0.248 -0.124 8
0.174 0.081 -0.111 9
-0.152 -0.085 -0.095 8
-0.432 -0.185 0.014 7
-0.587 -0.24 0.216 10
-0.528 -0.216 0.439 8
-0.54 -0.195 0.395 9
-0.32 -0.258 0.531 8
0.088 -0.234 0.504 8
0.486 -0.179 0.425 9
0.648 -0.12 0.452 8
0.532 -0.068 0.54 9
0.478 -0.061 0.486 8
0.236 -0.023 0.525 8
-0.084 0.004 0.509 9
-0.415 0.068 0.465 7
-0.645 0.167 0.337 10
-0.724 0.204 0.113 8
-0.72 0.312 -0.121 8
-0.648 0.28 -0.109 9
-0.69 0.551 -0.229 8
-0.773 0.803 -0.177 9
-0.87 0.967 -0.031 8
-0.97 1.088 0.127 8
-1.033 1.214 0.262 9
-1.027 1.303 0.384 8
-0.925 1.172 0.346 8
-0.863 1.228 0.435 7
-0.689 1.277 0.491 10
-0.375 1.273 0.537 9
-0.018 1.134 0.512 8
0.291 0.906 0.438 8
0.262 0.815 0.394 9
0.53 0.607 0.402 8
0.775 0.359 0.507 9
0.945 0.025 0.628 8
1.053 -0.32 0.732 8
1.241 -0.645 0.838 9
1.528 -0.939 0.888 8
1.375 -0.845 0.8 7
1.769 -1.052 0.746 10
2.077 -1.172 0.523 8
2.154 -1.216 0.246 9
2.236 -1.374 0.07 8
2.297 -1.68 -0.19 9
2.072 -1.801 -0.533 8
1.864 -1.621 -0.48 8
1.397 -1.54 -0.67 9
0.9 -1.439 -0.822 8
0.595 -1.341 -1.0 8
0.458 -1.211 -1.085 9
0.412 -1.09 -0.977 7
-0.016 -1.001 -1.22 10
-0.015 -0.901 -1.098 8
-0.314 -0.895 -1.13 8
-0.639 -0.889 -1.015 9
-0.88 -0.833 -0.854 8
-1.063 -0.725 -0.789 9
-1.244 -0.561 -0.741 8
-1.119 -0.504 -0.667 8
-1.221 -0.344 -0.563 9
-1.207 -0.12 -0.489 8
-1.042 0.14 -0.402 9
-0.771 0.338 -0.266 6
-0.531 0.506 -0.176 10
-0.345 0.64 -0.14 9
-0.311 0.576 -0.126 8
-0.208 0.653 -0.198 9
-0.182 0.7 -0.307 8
-0.19 0.713 -0.279 8
-0.174 0.687 -0.237 9
-0.002 0.633 -0.368 8
0.382 0.592 -0.518 9
0.344 0.533 -0.466 8
0.923 0.568 -0.352 8
1.534 0.535 0.021 7
1.97 0.369 0.492 10
2.156 0.057 0.988 9
2.115 -0.435 1.351 8
1.904 -0.392 1.216 8
1.684 -0.847 1.222 9
1.266 -0.971 0.895 8
0.753 -0.843 0.506 8
0.44 -0.723 0.202 9
0.462 -0.68 -0.066 8
0.528 -0.594 -0.293 9
0.476 -0.535 -0.264 8
0.527 -0.507 -0.341 7
0.717 -0.744 -0.318 10
0.922 -1.03 -0.317 8
0.876 -1.083 -0.311 9
0.42 -0.766 -0.054 8
-0.118 -0.363 0.562 8
-0.106 -0.327 0.506 9
-0.347 -0.113 1.19 8
-0.266 0.008 1.739 9
0.043 0.083 2.182 8
0.459 0.204 2.417 8
0.897 0.292 2.435 9
0.808 0.263 2.191 6
1.259 0.253 2.084 11
1.542 0.356 1.814 8
1.53 0.534 1.553 8
1.311 0.656 1.518 9
0.939 0.73 1.637 8
0.543 0.715 1.738 8
0.488 0.643 1.564 9
0.179 0.548 1.656 8
0.016 0.495 1.711 9
0.044 0.565 1.668 8
0.112 0.682 1.651 8
0.013 0.701 1.832 7
-0.298 0.576 2.203 10
-0.268 0.518 1.983 9
-0.757 0.265 2.53 8
-1.254 -0.085 3.107 8
-1.566 -0.36 3.484 9
-1.589 -0.43 3.509 8
-1.364 -0.334 3.148 9
-1.123 -0.084 2.849 8
-1.011 -0.076 2.564 8
-0.929 0.173 2.465 9
-1.121 0.235 2.273 8
-1.592 0.156 2.057 7
-2.183 0.002 1.803 10
-2.731 -0.229 1.454 8
-2.457 -0.206 1.309 9
-2.9 -0.453 0.709 8
-3.123 -0.588 -0.186 8
-3.067 -0.624 -1.14 9
-2.8 -0.605 -1.903 8
-2.578 -0.566 -2.326 9
-2.572 -0.545 -2.406 8
-2.315 -0.49 -2.165 8
-2.506 -0.562 -1.961 9
-2.471 -0.752 -1.482 7
-2.245 -0.986 -1.146 10
-2.437 -0.923 -1.154 8
-2.572 -0.637 -1.143 8
-1.991 -0.653 -1.229 9
-1.791 -0.587 -1.106 8
-1.002 -0.721 -1.302 9
-0.384 -0.743 -1.27 8
-0.003 -0.797 -1.057 8
-0.004 -0.89 -0.846 9
-0.218 -1.031 -0.671 8
-0.395 -1.162 -0.548 9
-0.356 -1.046 -0.493 6
-0.451 -1.1 -0.455 10
-0.482 -1.074 -0.515 9
-0.398 -1.007 -0.758 8
-0.039 -0.904 -1.108 9
0.547 -0.68 -1.484 8
0.492 -0.612 -1.335 8
1.018 -0.354 -1.75 9
1.28 -0.182 -2.032 8
1.192 -0.027 -2.082 8
0.864 0.057 -2.014 9
0.508 0.002 -1.843 8
0.457 0.002 -1.658 7
0.166 -0.156 -1.389 10
0.022 -0.401 -1.085 8
0.044 -0.617 -0.824 9
0.173 -0.701 -0.627 8
0.425 -0.657 -0.479 9
0.715 -0.543 -0.457 8
0.95 -0.366 -0.594 8
0.855 -0.329 -0.535 9
0.974 -0.092 -0.827 8
0.95 0.129 -1.17 9
0.823 0.274 -1.53 8
0.63 0.348 -1.809 7
0.441 0.329 -1.912 10
0.397 0.296 -2.021 8
0.316 0.267 -1.819 9
0.183 0.259 -2.178 8
0.052 0.422 -2.462 8
0.13 0.469 -2.36 9
0.218 0.409 -2.175 8
0.152 0.361 -1.955 9
0.136 0.325 -1.76 8
-0.122 0.293 -1.379 8
-0.561 0.272 -0.827 9
-0.914 0.197 -0.111 6
-1.093 0.028 0.506 10
-1.234 -0.116 0.711 9
-1.29 -0.251 0.639 8
-1.161 -0.226 0.575 9
-0.964 -0.3 0.553 8
-0.52 -0.16 0.451 8
0.037 0.03 0.15 9
0.526 0.118 -0.093 8
0.743 0.111 -0.13 9
0.615 0.025 0.036 8
0.553 0.023 0.032 8
0.195 -0.127 0.322 7
-0.271 -0.297 0.635 10
-0.673 -0.271 0.985 9
-1.007 -0.256 1.143 8
-1.292 -0.378 1.095 8
-1.163 -0.303 1.101 9
-1.046 -0.273 0.991 8
-0.956 -0.037 0.908 9
-0.596 0.176 0.599 8
-0.144 0.301 0.217 8
0.256 0.347 -0.213 9
0.543 0.35 -0.614 8
0.489 0.315 -0.553 7
0.555 0.294 -0.756 10
0.367 0.238 -0.808 8
0.04 0.172 -0.785 9
-0.325 0.05 -0.702 8
-0.58 -0.039 -0.707 8
-0.8 0.031 -0.719 9
-0.72 0.028 -0.647 8
-0.86 0.123 -0.489 9
-0.751 0.17 -0.334 8
-0.509 0.237 -0.258 8
-0.144 0.355 -0.123 9
0.245 0.457 0.114 7
0.416 0.439 0.382 10
0.375 0.395 0.344 8
0.25 0.259 0.66 8
-0.041 0.118 1.016 9
-0.276 0.04 1.255 8
-0.404 0.008 1.273 9
-0.442 0.0 1.075 8
-0.398 0.035 0.744 8
-0.358 0.031 0.669 9
-0.343 0.184 0.365 8
-0.366 0.411 0.164 9
-0.455 0.611 0.051 6
-0.544 0.736 0.004 10
-0.528 0.774 -0.012 9
-0.475 0.697 -0.011 8
-0.329 0.677 -0.022 8
-0.155 0.624 -0.036 9
-0.029 0.577 -0.052 8
0.045 0.563 -0.059 9
0.046 0.628 -0.054 8
0.016 0.681 -0.038 8
0.015 0.613 -0.034 9
-0.048 0.577 -0.018 8
-0.204 0.532 -0.003 7
-0.354 0.483 0.004 10
-0.365 0.37 0.003 8
-0.237 0.238 -0.002 9
-0.074 0.162 -0.003 8
-0.066 0.146 -0.003 9
0.032 0.126 0.003 8
0.078 0.184 0.028 8
0.091 0.34 0.141 9
0.091 0.477 0.318 8
0.121 0.473 0.446 9
0.226 0.359 0.508 8
0.204 0.323 0.457 7
0.36 0.159 0.476 10
0.518 -0.009 0.556 8
0.66 -0.105 0.666 9
0.781 -0.182 0.698 8
0.859 -0.272 0.711 8
0.773 -0.245 0.64 9
0.845 -0.275 0.662 8
0.969 -0.254 0.679 9
1.122 -0.2 0.674 8
1.251 -0.133 0.633 8
1.304 -0.091 0.564 9
1.173 -0.082 0.508 6
1.143 -0.077 0.455 10
1.03 -0.082 0.411 9
0.839 -0.104 0.344 8
0.58 -0.113 0.254 9
0.267 -0.078 0.14 8
-0.009 -0.04 0.022 8
-0.163 0.002 -0.058 9
-0.147 0.002 -0.052 8
-0.154 0.026 -0.12 9
0.006 0.032 -0.188 8
0.245 0.063 -0.248 8
0.444 0.106 -0.29 7
0.547 0.094 -0.262 10
0.551 0.048 -0.16 9
0.496 0.043 -0.144 8
0.446 0.014 -0.023 8
# end
#Thu Feb 26 20:37:50 GMT+08:00 20151
