# Supplementary material for: Abnormal Gait Behavior Detection for Elderly Based on Enhanced Wigner-Ville Analysis and Cloud Incremental SVM Learning
Source: Hindawi journal article supplement (doi:10.1155/2016/5869238), 2016-01-01
Supplement: f1 [file 5869238.f1.zip › Supplementary Materials/Original Data/Climbing three steps/original__32.txt]

# Accelerometer Values
# filename:  original__32.txt
# Saving start time: Thu Feb 26 20:22:26 GMT+08:00 2015

# sensor resolution: 0.0095825195m/s^2
#Sensorvendor: KIONIX, name: KX023 Accelerometer, type: 1,version : 1, range 39.240005

# X value, Y value, Z value, time diff in ms
-0.325 0.042 -0.177 8
-0.28 0.035 -0.094 9
-0.2 0.019 0.02 8
-0.18 0.017 0.018 9
-0.075 -0.006 0.119 8
0.018 -0.031 0.171 7
0.058 -0.055 0.161 10
0.034 -0.06 0.135 8
-0.029 -0.034 0.14 9
-0.107 0.0 0.14 8
-0.096 0.0 0.126 8
-0.151 0.021 0.098 9
-0.176 0.034 0.068 8
-0.174 0.038 0.036 8
-0.13 0.034 -0.015 9
-0.063 0.021 -0.066 8
-0.011 0.004 -0.086 9
-0.009 0.004 -0.077 6
0.006 -0.003 -0.07 10
-0.007 0.0 -0.059 9
-0.035 0.009 -0.039 8
-0.073 0.023 -0.025 9
-0.101 0.036 -0.022 8
-0.097 0.034 -0.008 8
-0.087 0.031 -0.007 9
-0.058 0.021 0.025 8
-0.019 0.003 0.088 9
0.019 -0.027 0.165 8
0.047 -0.061 0.196 8
0.043 -0.068 0.191 7
0.009 -0.051 0.187 10
0.008 -0.046 0.168 9
-0.027 -0.027 0.157 8
-0.056 -0.01 0.125 8
-0.073 0.0 0.074 9
-0.054 -0.009 0.009 8
0.005 -0.042 -0.092 9
0.065 -0.079 -0.239 8
0.059 -0.071 -0.215 8
0.09 -0.091 -0.326 9
0.065 -0.082 -0.332 8
-0.024 -0.046 -0.251 7
-0.157 -0.017 -0.117 10
-0.284 -0.02 0.003 8
-0.368 -0.025 0.049 9
-0.331 -0.023 0.044 8
-0.359 -0.031 0.031 8
-0.324 -0.064 -0.007 9
-0.235 -0.097 -0.079 8
-0.111 -0.106 -0.201 9
-0.013 -0.084 -0.313 8
-0.007 -0.042 -0.342 8
-0.006 -0.038 -0.308 9
-0.09 0.005 -0.238 6
-0.217 0.042 -0.086 11
-0.353 0.069 0.078 8
-0.437 0.079 0.231 8
-0.465 0.072 0.318 9
-0.448 0.073 0.276 8
-0.403 0.065 0.248 8
-0.305 0.07 0.095 9
-0.159 0.057 -0.107 8
-0.06 0.054 -0.297 9
-0.006 0.073 -0.449 8
0.062 0.098 -0.51 8
0.056 0.088 -0.459 7
0.13 0.146 -0.384 10
0.147 0.227 -0.164 9
0.099 0.299 0.117 8
0.055 0.319 0.294 8
0.05 0.279 0.313 9
0.062 0.239 0.254 8
0.094 0.177 0.188 9
0.084 0.159 0.169 8
0.15 0.083 0.045 8
0.231 0.013 -0.121 9
0.283 -0.051 -0.231 8
0.29 -0.093 -0.287 7
0.263 -0.127 -0.344 10
0.236 -0.163 -0.445 8
0.212 -0.146 -0.401 9
0.199 -0.207 -0.505 8
0.17 -0.295 -0.518 9
0.096 -0.346 -0.42 8
-0.004 -0.363 -0.271 8
-0.065 -0.396 -0.15 9
-0.071 -0.435 -0.085 8
-0.063 -0.391 -0.076 8
-0.045 -0.405 -0.05 9
-0.026 -0.387 -0.046 7
0.004 -0.361 -0.045 10
0.04 -0.34 -0.023 8
0.043 -0.29 0.064 8
0.002 -0.196 0.221 9
0.001 -0.177 0.199 8
-0.035 -0.069 0.318 9
-0.023 0.054 0.324 8
0.045 0.162 0.241 8
0.134 0.221 0.147 9
0.185 0.261 0.113 8
0.158 0.334 0.139 9
0.142 0.301 0.125 6
0.078 0.4 0.218 10
0.025 0.513 0.352 9
-0.022 0.644 0.476 8
-0.044 0.761 0.555 9
-0.018 0.839 0.569 8
0.034 0.925 0.549 8
0.031 0.833 0.494 9
0.085 0.959 0.544 8
0.122 1.066 0.766 9
0.127 1.18 1.046 8
0.109 1.261 1.379 8
0.098 1.134 1.241 7
0.08 1.244 1.901 10
0.072 1.12 1.711 8
0.113 1.086 1.67 9
0.202 1.057 1.505 8
0.352 1.041 1.161 9
0.593 0.967 0.679 8
0.926 0.79 0.216 8
0.833 0.711 -0.127 9
1.145 0.64 -0.114 8
1.329 0.239 -0.187 9
1.334 -0.096 0.01 8
1.109 -0.39 0.359 7
0.685 -0.523 0.748 10
0.168 -0.554 1.073 8
0.151 -0.498 0.965 9
-0.29 -0.514 0.869 8
-0.521 -0.553 1.272 8
-0.528 -0.621 1.09 9
-0.332 -0.732 0.792 8
-0.034 -0.89 0.455 9
0.224 -1.076 0.137 8
0.202 -0.968 0.123 8
0.456 -1.218 -0.116 9
0.72 -1.466 -0.25 6
0.86 -1.598 -0.324 11
0.816 -1.611 -0.388 8
0.632 -1.57 -0.419 8
0.401 -1.516 -0.48 9
0.361 -1.364 -0.432 8
0.173 -1.324 -0.566 9
0.043 -1.271 -0.768 8
-0.051 -1.194 -0.966 8
-0.16 -1.082 -1.07 9
-0.287 -0.934 -1.164 8
-0.39 -0.798 -1.281 8
-0.351 -0.718 -1.153 7
-0.428 -0.619 -1.235 10
-0.508 -0.526 -1.234 9
-0.555 -0.446 -1.154 8
-0.506 -0.423 -1.035 8
-0.354 -0.463 -0.965 9
-0.144 -0.534 -0.96 8
-0.129 -0.48 -0.958 9
0.028 -0.432 -0.862 8
0.07 -0.698 -0.838 8
-0.009 -0.776 -0.78 9
-0.153 -0.797 -0.705 8
-0.293 -0.768 -0.636 7
-0.391 -0.716 -0.557 10
-0.352 -0.645 -0.455 8
-0.389 -0.58 -0.409 9
-0.356 -0.518 -0.291 8
-0.261 -0.468 -0.148 8
-0.172 -0.4 -0.02 9
-0.162 -0.309 -0.01 8
-0.222 -0.196 -0.136 9
-0.2 -0.176 -0.122 8
-0.287 -0.024 -0.11 8
-0.38 0.149 -0.566 9
-0.429 0.315 -0.714 7
-0.385 0.443 -0.778 10
-0.215 0.498 -0.797 8
-0.038 0.619 -0.762 8
-0.034 0.557 -0.685 9
-0.027 0.816 -0.617 8
-0.067 0.969 -0.174 9
0.007 0.884 0.277 8
0.093 0.751 0.622 8
0.072 0.731 0.787 9
-0.021 0.815 0.826 8
-0.019 0.734 0.743 9
-0.111 0.856 0.711 6
-0.148 0.967 0.615 10
-0.14 1.108 0.475 9
-0.121 1.263 0.319 8
-0.079 1.361 0.233 8
0.018 1.366 0.303 9
0.016 1.229 0.273 8
0.099 1.176 0.482 9
0.092 1.093 0.764 8
0.022 1.008 1.016 8
-0.066 0.959 1.088 9
-0.137 0.956 0.958 8
-0.123 0.861 0.863 7
-0.172 0.848 0.664 10
-0.2 0.78 0.505 8
-0.225 0.684 0.473 9
-0.283 0.583 0.543 8
-0.363 0.489 0.595 9
-0.432 0.39 0.541 8
-0.493 0.303 0.408 8
-0.443 0.273 0.367 9
-0.553 0.215 0.217 8
-0.679 0.179 0.031 9
-0.738 0.159 -0.148 8
-0.735 0.146 -0.251 7
-0.706 0.134 -0.235 10
-0.66 0.113 -0.024 8
-0.594 0.102 -0.022 9
-0.54 0.034 0.36 8
-0.483 -0.127 0.823 8
-0.426 -0.357 1.228 9
-0.363 -0.582 1.482 8
-0.266 -0.809 1.559 8
-0.112 -1.024 1.432 9
-0.101 -0.922 1.289 8
0.024 -1.074 0.969 9
0.023 -1.163 0.475 6
-0.062 -1.202 -0.048 10
-0.155 -1.188 -0.504 9
-0.217 -1.141 -0.827 8
-0.243 -1.097 -0.975 9
-0.218 -0.988 -0.877 8
-0.216 -0.967 -0.907 8
-0.186 -0.941 -0.864 9
-0.089 -0.89 -0.726 8
0.106 -0.862 -0.479 9
0.309 -0.872 -0.302 8
0.435 -0.821 -0.356 8
0.392 -0.739 -0.32 7
0.457 -0.622 -0.458 10
0.489 -0.509 -0.582 9
0.488 -0.42 -0.759 8
0.465 -0.33 -0.927 8
0.404 -0.24 -0.993 9
0.29 -0.165 -0.964 8
0.261 -0.148 -0.868 9
0.126 -0.098 -0.795 8
0.001 -0.098 -0.683 8
-0.068 -0.154 -0.607 9
-0.078 -0.196 -0.614 8
-0.068 -0.207 -0.622 7
-0.027 -0.236 -0.593 10
-0.024 -0.212 -0.534 8
0.077 -0.24 -0.492 9
0.202 -0.243 -0.413 8
0.289 -0.248 -0.26 8
0.31 -0.259 -0.061 9
0.237 -0.253 0.129 8
0.097 -0.201 0.263 9
0.087 -0.181 0.237 8
-0.036 -0.123 0.285 8
-0.099 -0.1 0.217 9
-0.095 -0.062 0.017 6
-0.036 0.011 -0.227 11
0.061 0.093 -0.406 8
0.166 0.14 -0.505 8
0.149 0.126 -0.455 9
0.218 0.139 -0.486 8
0.229 0.163 -0.451 9
0.163 0.202 -0.393 8
0.046 0.259 -0.319 8
-0.077 0.347 -0.169 9
-0.248 0.496 0.07 8
-0.223 0.447 0.063 9
-0.406 0.672 0.281 6
-0.434 0.854 0.362 10
-0.268 0.918 0.281 9
-0.024 0.915 0.145 8
0.167 0.901 0.124 9
0.283 0.894 0.255 8
0.254 0.804 0.23 8
0.327 0.829 0.376 9
0.367 0.857 0.476 8
0.368 0.88 0.622 8
0.326 0.933 0.811 9
0.272 0.986 0.939 8
0.245 0.887 0.845 7
0.214 0.913 0.842 10
0.198 0.896 0.717 8
0.192 0.855 0.576 9
0.176 0.802 0.497 8
0.133 0.783 0.464 9
0.076 0.819 0.471 8
-0.003 0.86 0.566 8
-0.003 0.774 0.509 9
-0.087 0.798 0.625 8
-0.112 0.788 0.664 9
-0.054 0.763 0.634 8
0.067 0.729 0.558 7
0.258 0.658 0.409 10
0.536 0.532 0.19 8
0.482 0.478 0.171 9
0.794 0.274 0.013 8
1.052 0.048 0.059 8
1.186 -0.177 0.355 9
1.179 -0.454 0.814 8
1.063 -0.705 1.245 8
0.858 -0.891 1.521 9
0.772 -0.802 1.368 8
0.555 -0.964 1.469 9
0.381 -1.085 1.356 6
0.267 -1.154 1.044 10
0.212 -1.205 0.511 9
0.19 -1.26 -0.155 8
0.212 -1.324 -0.758 9
0.191 -1.191 -0.682 8
0.231 -1.263 -1.061 8
0.265 -1.332 -1.173 9
0.296 -1.412 -1.165 8
0.29 -1.443 -1.114 9
0.247 -1.407 -1.045 8
0.186 -1.34 -0.975 8
0.167 -1.206 -0.877 7
0.086 -1.105 -0.81 10
-0.005 -0.938 -0.71 9
-0.099 -0.745 -0.603 8
-0.212 -0.541 -0.52 8
-0.311 -0.352 -0.471 9
-0.312 -0.215 -0.507 8
-0.281 -0.193 -0.456 8
-0.186 -0.084 -0.603 9
-0.081 -0.004 -0.748 8
-0.02 0.064 -0.754 9
-0.02 0.134 -0.63 8
-0.061 0.177 -0.457 7
-0.084 0.189 -0.285 10
-0.076 0.17 -0.256 8
-0.064 0.156 -0.136 9
-0.074 0.133 -0.099 8
-0.116 0.104 -0.146 8
-0.19 0.071 -0.245 9
-0.291 0.051 -0.362 8
-0.414 0.047 -0.47 9
-0.372 0.042 -0.423 8
-0.498 0.051 -0.468 8
-0.575 0.078 -0.467 9
-0.634 0.15 -0.486 6
-0.671 0.231 -0.485 11
-0.641 0.236 -0.405 8
-0.558 0.18 -0.246 8
-0.502 0.162 -0.221 9
-0.416 0.098 -0.051 8
-0.336 0.035 0.056 9
-0.249 -0.044 0.063 8
-0.179 -0.092 0.0 8
-0.132 -0.073 -0.098 9
-0.094 -0.02 -0.21 8
-0.084 -0.018 -0.189 8
-0.052 0.036 -0.287 7
-0.031 0.111 -0.393 10
-0.036 0.251 -0.469 9
0.011 0.345 -0.372 8
0.084 0.336 -0.155 8
0.101 0.313 0.097 9
0.091 0.281 0.087 8
0.075 0.293 0.345 9
0.059 0.341 0.511 8
0.072 0.422 0.591 8
0.078 0.537 0.648 9
0.078 0.652 0.647 8
0.07 0.587 0.583 7
0.085 0.682 0.503 10
0.115 0.815 0.39 8
0.148 0.933 0.286 9
0.175 0.935 0.233 8
0.179 0.889 0.232 9
0.133 0.847 0.311 8
0.065 0.797 0.435 8
0.058 0.718 0.392 9
-0.002 0.661 0.388 8
-0.055 0.594 0.254 8
-0.106 0.542 0.136 9
-0.156 0.491 0.116 7
-0.211 0.423 0.277 10
-0.26 0.354 0.56 8
-0.234 0.319 0.504 8
-0.264 0.245 0.73 9
-0.278 0.175 0.837 8
-0.257 0.12 0.853 9
-0.208 0.031 0.773 8
-0.163 -0.06 0.571 8
-0.145 -0.136 0.366 9
-0.13 -0.123 0.329 8
-0.16 -0.188 0.239 9
-0.229 -0.203 0.132 6
-0.338 -0.157 -0.071 10
-0.517 -0.084 -0.235 9
-0.705 -0.038 -0.243 8
-0.804 0.002 -0.149 9
-0.724 0.002 -0.134 8
-0.757 0.035 0.002 8
-0.759 0.005 0.188 9
-0.768 -0.083 0.368 8
-0.805 -0.164 0.502 9
-0.833 -0.223 0.654 8
-0.804 -0.306 0.81 8
-0.724 -0.276 0.729 7
-0.635 -0.408 0.801 10
-0.506 -0.505 0.684 8
-0.361 -0.532 0.426 9
-0.234 -0.566 0.172 8
-0.153 -0.646 -0.035 9
-0.104 -0.742 -0.178 8
-0.094 -0.668 -0.16 8
-0.022 -0.729 -0.151 9
0.106 -0.789 0.005 8
0.234 -0.877 0.28 9
0.328 -0.901 0.554 8
0.415 -0.818 0.641 7
0.501 -0.675 0.485 10
0.451 -0.608 0.436 8
0.526 -0.44 0.032 9
0.584 -0.269 -0.483 8
0.602 -0.129 -0.86 8
0.57 -0.018 -1.025 9
0.493 0.078 -1.052 8
0.398 0.172 -0.975 9
0.359 0.155 -0.877 8
0.275 0.217 -0.771 8
0.186 0.228 -0.696 9
0.093 0.234 -0.7 6
0.022 0.23 -0.76 11
-0.007 0.18 -0.778 8
-0.016 0.088 -0.708 8
-0.014 0.079 -0.637 9
-0.018 -0.055 -0.537 8
0.008 -0.207 -0.405 8
0.074 -0.364 -0.257 9
0.145 -0.558 -0.138 8
0.186 -0.79 0.019 9
0.158 -0.994 0.222 8
0.142 -0.895 0.199 8
0.038 -0.993 0.289 7
-0.058 -0.935 0.242 10
-0.063 -0.925 0.189 9
0.019 -1.005 0.202 8
0.081 -0.952 0.126 8
0.075 -0.794 -0.042 9
0.068 -0.714 -0.038 8
0.06 -0.52 -0.13 9
0.106 -0.25 -0.162 8
0.218 -0.003 -0.162 8
0.371 0.163 -0.118 9
0.48 0.273 -0.027 8
0.432 0.245 -0.024 7
0.462 0.347 0.013 10
0.45 0.45 -0.034 8
0.473 0.506 -0.126 9
0.56 0.514 -0.295 8
0.634 0.496 -0.523 8
0.583 0.525 -0.704 9
0.423 0.637 -0.786 8
0.381 0.573 -0.707 9
0.235 0.736 -0.704 8
0.15 0.855 -0.624 8
0.106 0.881 -0.483 9
0.072 0.865 -0.31 7
0.028 0.827 -0.151 10
-0.026 0.746 0.003 8
-0.023 0.671 0.002 8
-0.065 0.541 0.164 9
-0.092 0.377 0.269 8
-0.094 0.227 0.304 9
-0.068 0.129 0.281 8
-0.044 0.075 0.199 8
-0.03 0.039 0.075 9
-0.027 0.035 0.068 8
-0.007 0.01 -0.05 9
-0.006 -0.005 -0.127 6
-0.006 -0.007 -0.164 10
0.006 0.008 -0.173 9
0.019 0.02 -0.147 8
0.035 0.017 -0.094 9
0.031 0.015 -0.084 8
0.058 0.045 -0.024 8
0.069 0.094 0.063 9
0.02 0.12 0.175 8
-0.058 0.202 0.244 8
-0.106 0.301 0.25 9
-0.068 0.3 0.173 8
-0.061 0.27 0.156 7
0.075 0.189 -0.043 10
0.252 0.068 -0.293 8
0.366 -0.031 -0.449 9
0.406 -0.075 -0.458 8
0.38 -0.085 -0.317 9
0.25 -0.024 -0.111 8
0.225 -0.022 -0.1 8
0.028 0.122 0.075 9
-0.157 0.26 0.213 8
-0.252 0.322 0.297 9
-0.263 0.294 0.32 8
-0.252 0.237 0.302 7
-0.225 0.211 0.267 10
-0.202 0.19 0.24 8
-0.175 0.162 0.176 9
-0.174 0.137 0.048 8
-0.173 0.135 -0.093 8
-0.146 0.1 -0.171 9
-0.135 0.029 -0.183 8
-0.172 0.017 -0.173 9
-0.155 0.015 -0.156 8
-0.223 0.083 -0.161 8
-0.279 0.149 -0.217 9
-0.317 0.181 -0.299 6
-0.332 0.197 -0.342 10
-0.303 0.192 -0.401 9
-0.249 0.171 -0.5 8
-0.224 0.153 -0.45 9
-0.184 0.14 -0.544 8
-0.168 0.137 -0.547 8
-0.148 0.132 -0.427 9
-0.088 0.106 -0.194 8
-0.025 0.064 0.115 9
-0.002 0.038 0.366 8
-0.002 0.034 0.329 8
-0.005 0.028 0.453 7
-0.017 0.024 0.476 10
-0.033 0.027 0.414 9
-0.046 0.044 0.288 8
-0.052 0.069 0.15 8
-0.037 0.089 0.069 9
-0.033 0.08 0.062 8
-0.01 0.088 0.069 8
0.0 0.084 0.155 9
0.003 0.072 0.254 8
0.002 0.046 0.312 9
0.002 0.024 0.323 8
0.002 0.022 0.29 7
0.0 0.015 0.281 10
-0.017 0.018 0.257 8
-0.046 0.02 0.197 9
-0.07 0.03 0.094 8
-0.082 0.043 -0.023 8
-0.091 0.044 -0.147 9
-0.085 0.043 -0.253 8
-0.077 0.039 -0.228 9
-0.062 0.035 -0.292 8
-0.046 0.022 -0.324 8
-0.036 0.006 -0.339 9
-0.035 -0.003 -0.364 7
-0.028 -0.005 -0.383 10
-0.002 -0.006 -0.359 8
-0.001 -0.006 -0.323 8
0.042 -0.013 -0.244 9
0.073 -0.026 -0.115 8
0.081 -0.043 0.032 9
0.066 -0.05 0.163 8
0.036 -0.041 0.237 8
0.012 -0.031 0.241 9
0.011 -0.028 0.217 8
-0.005 -0.028 0.167 8
-0.016 -0.021 0.072 7
-0.02 0.002 -0.051 10
0.0 0.01 -0.162 9
0.027 0.001 -0.235 8
0.042 -0.004 -0.252 8
0.038 -0.003 -0.226 9
0.036 -0.001 -0.171 8
0.02 -0.002 -0.088 9
-0.001 -0.006 0.0 8
-0.012 -0.006 0.096 8
0.0 -0.004 0.181 9
0.015 0.0 0.249 8
0.013 0.0 0.224 7
0.022 0.0 0.25 10
0.033 0.002 0.19 8
0.054 0.004 0.088 9
0.069 0.002 0.035 8
0.07 -0.003 0.012 9
0.073 -0.012 -0.047 8
0.066 -0.011 -0.042 8
0.073 -0.024 -0.143 9
0.068 -0.031 -0.222 8
0.052 -0.032 -0.22 9
0.034 -0.029 -0.116 8
-0.015 -0.002 -0.006 7
-0.072 0.016 0.072 10
-0.065 0.015 0.065 8
-0.096 0.019 0.179 8
-0.106 0.031 0.253 9
-0.075 0.034 0.266 8
-0.018 0.013 0.29 9
0.025 -0.005 0.315 8
0.039 -0.002 0.324 8
0.035 -0.001 0.292 9
0.025 0.011 0.285 8
0.004 0.016 0.253 9
0.005 0.006 0.14 6
0.037 -0.008 -0.075 10
0.074 -0.035 -0.31 9
0.092 -0.059 -0.482 8
0.083 -0.053 -0.434 9
0.072 -0.046 -0.512 8
0.032 -0.023 -0.496 8
# end
#Thu Feb 26 20:22:32 GMT+08:00 20155
