# Supplementary material for: Abnormal Gait Behavior Detection for Elderly Based on Enhanced Wigner-Ville Analysis and Cloud Incremental SVM Learning
Source: Hindawi journal article supplement (doi:10.1155/2016/5869238), 2016-01-01
Supplement: f1 [file 5869238.f1.zip › Supplementary Materials/Original Data/Climbing three steps/original__34.txt]

# Accelerometer Values
# filename:  original__34.txt
# Saving start time: Thu Feb 26 20:22:45 GMT+08:00 2015

# sensor resolution: 0.0095825195m/s^2
#Sensorvendor: KIONIX, name: KX023 Accelerometer, type: 1,version : 1, range 39.240005

# X value, Y value, Z value, time diff in ms
-0.07 0.035 -0.219 8
-0.03 0.001 -0.287 9
0.041 -0.09 -0.287 8
0.125 -0.195 -0.179 9
0.113 -0.176 -0.161 8
0.18 -0.214 -0.028 8
0.225 -0.198 0.061 7
0.265 -0.196 0.163 10
0.242 -0.176 0.284 8
0.129 -0.113 0.297 9
0.008 -0.016 0.22 8
0.007 -0.015 0.198 9
-0.068 0.088 0.127 8
-0.099 0.154 0.063 8
-0.079 0.175 0.014 9
-0.044 0.164 -0.024 8
-0.023 0.144 -0.055 9
-0.021 0.117 -0.058 8
-0.019 0.105 -0.052 7
-0.053 0.106 -0.035 10
-0.105 0.13 -0.031 8
-0.145 0.147 -0.044 9
-0.148 0.14 -0.065 8
-0.12 0.114 -0.071 8
-0.086 0.103 -0.051 9
-0.077 0.092 -0.046 8
-0.04 0.063 -0.021 9
0.014 -0.012 0.0 8
0.06 -0.084 0.004 8
0.078 -0.116 0.002 9
0.081 -0.113 0.008 6
0.067 -0.102 0.02 11
0.061 -0.092 0.018 8
0.045 -0.096 0.025 8
0.025 -0.1 0.024 9
-0.001 -0.08 0.022 8
-0.03 -0.051 0.021 8
-0.04 -0.039 0.019 9
-0.029 -0.026 0.0 8
-0.026 -0.023 0.0 9
-0.007 0.004 -0.063 8
0.011 0.043 -0.154 8
0.022 0.087 -0.19 7
0.039 0.091 -0.157 10
0.074 0.051 -0.085 9
0.1 0.023 -0.011 8
0.09 0.019 0.041 8
0.081 0.017 0.037 9
0.053 0.01 0.077 8
-0.008 0.005 0.091 9
-0.068 0.016 0.074 8
-0.105 0.03 0.046 8
-0.107 0.024 -0.002 9
-0.083 -0.013 -0.049 8
-0.074 -0.012 -0.044 7
-0.037 -0.049 -0.082 10
-0.002 -0.052 -0.13 8
0.018 -0.029 -0.137 9
0.023 -0.012 -0.079 8
0.0 0.011 -0.003 8
-0.052 0.061 0.048 9
-0.047 0.055 0.043 8
-0.085 0.103 0.066 9
-0.082 0.112 0.07 8
-0.053 0.09 0.065 8
-0.032 0.074 0.063 9
-0.031 0.048 0.065 7
-0.045 -0.003 0.064 10
-0.04 -0.003 0.058 8
-0.069 -0.042 0.047 8
-0.12 -0.059 0.022 9
-0.167 -0.085 -0.058 8
-0.203 -0.12 -0.188 9
-0.245 -0.157 -0.301 8
-0.285 -0.191 -0.362 8
-0.257 -0.172 -0.325 9
-0.282 -0.184 -0.321 8
-0.309 -0.164 -0.253 9
-0.353 -0.102 -0.18 6
-0.416 -0.037 -0.144 10
-0.487 0.019 -0.15 9
-0.534 0.07 -0.251 8
-0.481 0.063 -0.226 9
-0.504 0.091 -0.376 8
-0.499 0.091 -0.452 8
-0.482 0.093 -0.472 9
-0.455 0.102 -0.478 8
-0.42 0.114 -0.48 8
-0.372 0.125 -0.453 9
-0.335 0.112 -0.407 8
-0.272 0.111 -0.314 7
-0.175 0.116 -0.111 10
-0.026 0.127 0.172 8
0.142 0.139 0.407 9
0.275 0.156 0.546 8
0.38 0.179 0.6 9
0.342 0.161 0.54 8
0.417 0.214 0.501 8
0.468 0.276 0.406 9
0.503 0.26 0.261 8
0.494 0.223 0.033 9
0.448 0.21 -0.213 8
0.403 0.189 -0.192 7
0.351 0.137 -0.346 10
0.304 0.053 -0.344 8
0.255 -0.019 -0.257 9
0.215 -0.08 -0.192 8
0.184 -0.138 -0.195 8
0.17 -0.175 -0.246 9
0.182 -0.177 -0.271 8
0.164 -0.159 -0.243 8
0.2 -0.159 -0.194 9
0.249 -0.196 -0.081 8
0.301 -0.252 0.033 9
0.361 -0.292 0.121 6
0.42 -0.306 0.171 10
0.457 -0.272 0.188 9
0.412 -0.245 0.169 8
0.45 -0.174 0.178 9
0.457 -0.082 0.222 8
0.352 0.024 0.308 8
0.149 0.128 0.367 9
-0.073 0.235 0.389 8
-0.276 0.364 0.437 9
-0.248 0.49 0.525 8
-0.223 0.441 0.472 8
-0.372 0.534 0.541 7
-0.263 0.618 0.567 10
-0.139 0.696 0.593 9
-0.036 0.727 0.703 8
0.052 0.71 0.843 8
0.096 0.703 1.002 9
0.086 0.633 0.902 8
0.056 0.698 1.204 9
0.004 0.821 1.49 8
-0.004 0.931 1.587 8
0.037 0.969 1.523 9
0.114 0.968 1.275 8
0.103 0.871 1.147 7
0.196 0.868 0.702 10
0.304 0.776 0.238 8
0.463 0.546 -0.113 9
0.629 0.24 -0.302 8
0.728 -0.05 -0.253 8
0.796 -0.35 0.041 9
0.784 -0.657 0.493 8
0.705 -0.592 0.443 9
0.601 -0.778 0.826 8
0.472 -0.82 1.081 8
0.344 -0.764 1.224 9
0.233 -0.668 1.179 6
0.207 -0.588 0.9 11
0.283 -0.549 0.392 8
0.255 -0.494 0.352 8
0.378 -0.52 -0.137 9
0.447 -0.651 -0.354 8
0.448 -0.841 -0.264 9
0.479 -1.001 -0.046 8
0.517 -1.114 0.097 8
0.422 -1.137 0.061 9
0.38 -1.023 0.055 8
0.187 -0.991 -0.205 9
0.037 -0.928 -0.572 6
-0.058 -0.868 -0.938 10
-0.117 -0.836 -1.231 9
-0.144 -0.789 -1.511 8
-0.178 -0.73 -1.823 8
-0.16 -0.657 -1.641 9
-0.201 -0.652 -1.894 8
-0.248 -0.67 -1.982 9
-0.325 -0.677 -1.873 8
-0.434 -0.683 -1.645 8
-0.513 -0.721 -1.402 9
-0.513 -0.832 -1.239 8
-0.462 -0.749 -1.115 7
-0.414 -0.869 -1.136 10
-0.343 -0.9 -1.245 8
-0.273 -0.866 -1.321 9
-0.196 -0.816 -1.364 8
-0.106 -0.779 -1.337 9
-0.024 -0.745 -1.231 8
-0.021 -0.67 -1.108 8
0.011 -0.633 -0.965 9
-0.031 -0.574 -0.768 8
-0.109 -0.502 -0.506 9
-0.185 -0.394 -0.195 8
-0.26 -0.201 0.051 7
-0.31 0.014 0.134 10
-0.279 0.013 0.121 8
-0.282 0.163 0.052 9
-0.263 0.258 -0.111 8
-0.229 0.322 -0.253 8
-0.163 0.366 -0.26 9
-0.083 0.417 -0.116 8
-0.01 0.487 0.086 8
0.034 0.56 0.221 9
0.03 0.504 0.199 8
0.039 0.611 0.228 9
0.014 0.767 0.178 6
-0.02 0.965 0.126 10
-0.031 1.125 0.124 9
0.002 1.195 0.142 8
0.061 1.237 0.187 9
0.055 1.113 0.168 8
0.14 1.18 0.333 8
0.236 1.243 0.577 9
0.294 1.3 0.728 8
0.298 1.337 0.738 9
0.215 1.342 0.621 8
0.107 1.412 0.508 8
0.096 1.27 0.458 7
-0.005 1.418 0.495 10
-0.161 1.547 0.607 9
-0.323 1.612 0.826 8
-0.43 1.599 1.124 8
-0.469 1.5 1.289 9
-0.446 1.334 1.274 8
-0.401 1.201 1.146 8
-0.397 1.043 0.981 9
-0.486 0.848 0.722 8
-0.661 0.574 0.539 9
-0.858 0.266 0.483 8
-1.025 0.028 0.559 7
-1.14 -0.108 0.758 10
-1.026 -0.097 0.682 8
-1.069 -0.181 0.998 9
-0.969 -0.285 1.34 8
-0.783 -0.459 1.598 8
-0.624 -0.673 1.767 9
-0.514 -0.838 1.784 8
-0.442 -0.969 1.587 9
-0.398 -0.872 1.429 8
-0.355 -1.032 1.014 8
-0.33 -1.166 0.366 9
-0.327 -1.239 -0.36 6
-0.32 -1.281 -0.907 11
-0.276 -1.297 -1.161 8
-0.203 -1.304 -1.207 8
-0.183 -1.174 -1.087 9
-0.032 -1.215 -0.976 8
0.185 -1.235 -0.652 9
0.374 -1.184 -0.267 8
0.517 -1.082 -0.02 8
0.616 -0.977 0.085 9
0.632 -0.859 0.049 8
0.568 -0.773 0.044 8
0.518 -0.61 -0.147 7
0.449 -0.461 -0.406 10
0.351 -0.358 -0.616 9
0.237 -0.254 -0.758 8
0.15 -0.17 -0.852 8
0.127 -0.133 -0.907 9
0.115 -0.119 -0.817 8
0.131 -0.116 -0.866 9
0.123 -0.127 -0.852 8
0.081 -0.153 -0.741 8
0.016 -0.218 -0.574 9
-0.04 -0.336 -0.428 8
-0.036 -0.302 -0.385 7
-0.086 -0.413 -0.359 10
-0.155 -0.466 -0.402 8
-0.188 -0.512 -0.386 9
-0.166 -0.578 -0.341 8
-0.129 -0.567 -0.386 9
-0.075 -0.489 -0.506 8
-0.003 -0.39 -0.609 8
-0.002 -0.351 -0.548 9
0.102 -0.264 -0.595 8
0.229 -0.23 -0.575 8
0.297 -0.196 -0.522 9
0.293 -0.137 -0.448 7
0.256 -0.077 -0.335 10
0.191 0.004 -0.24 8
0.172 0.004 -0.216 8
0.11 0.113 -0.227 9
0.105 0.215 -0.31 8
0.136 0.299 -0.348 9
0.143 0.362 -0.312 8
0.123 0.406 -0.269 8
0.087 0.459 -0.257 9
0.078 0.413 -0.231 8
0.055 0.477 -0.237 9
0.048 0.524 -0.229 6
0.036 0.545 -0.217 10
0.009 0.607 -0.217 9
-0.023 0.725 -0.2 8
-0.035 0.815 -0.157 9
-0.032 0.733 -0.141 8
-0.007 0.775 -0.091 8
0.043 0.79 0.002 9
0.108 0.813 0.179 8
0.193 0.835 0.414 9
0.275 0.862 0.593 8
0.32 0.903 0.658 8
0.288 0.812 0.592 7
0.293 0.851 0.595 10
0.267 0.871 0.599 8
0.228 0.894 0.665 9
0.181 0.905 0.757 8
0.127 0.879 0.816 9
0.071 0.827 0.86 8
0.064 0.745 0.774 8
0.001 0.706 0.767 9
-0.059 0.687 0.669 8
-0.111 0.667 0.559 9
-0.192 0.669 0.489 8
-0.273 0.716 0.445 7
-0.247 0.756 0.419 10
-0.223 0.681 0.377 8
-0.061 0.655 0.408 9
0.204 0.549 0.479 8
0.537 0.403 0.553 8
0.857 0.241 0.607 9
1.131 0.098 0.667 8
1.34 -0.071 0.813 9
1.206 -0.064 0.732 8
1.307 -0.327 0.902 8
1.273 -0.586 0.991 9
1.099 -0.768 1.019 6
0.771 -0.855 1.004 11
0.408 -0.866 0.966 8
0.107 -0.86 0.876 8
0.096 -0.774 0.788 9
-0.117 -0.76 0.595 8
-0.157 -0.806 0.299 8
-0.066 -0.911 0.009 9
0.04 -0.993 -0.174 8
0.126 -1.046 -0.279 9
0.191 -1.071 -0.342 8
0.172 -0.964 -0.308 8
0.2 -0.994 -0.348 7
0.19 -1.028 -0.44 10
0.171 -1.051 -0.546 9
0.134 -1.038 -0.555 8
0.075 -0.96 -0.448 8
0.029 -0.836 -0.312 9
0.026 -0.752 -0.281 8
0.004 -0.67 -0.218 9
0.013 -0.633 -0.241 8
0.053 -0.604 -0.317 8
0.09 -0.578 -0.451 9
0.091 -0.533 -0.613 8
0.082 -0.48 -0.551 7
0.045 -0.402 -0.673 10
-0.047 -0.275 -0.773 8
-0.221 -0.142 -0.875 9
-0.403 -0.036 -1.007 8
-0.493 0.033 -1.082 8
-0.543 0.066 -1.013 9
-0.566 0.098 -0.837 8
-0.509 0.089 -0.753 9
-0.434 0.1 -0.546 8
-0.243 0.063 -0.358 8
-0.044 0.015 -0.19 9
0.08 0.004 -0.074 7
0.142 0.018 -0.012 10
0.16 0.014 -0.004 8
0.144 0.013 -0.003 8
0.121 0.021 -0.047 9
0.014 0.048 -0.098 8
-0.135 0.073 -0.105 9
-0.267 0.088 -0.067 8
-0.334 0.079 -0.013 8
-0.315 0.052 0.023 9
-0.283 0.047 0.021 8
-0.207 0.019 0.022 9
-0.079 0.001 0.0 6
0.04 0.006 -0.024 10
0.108 0.024 -0.093 9
0.133 0.042 -0.201 8
0.123 0.064 -0.32 8
0.11 0.058 -0.288 9
0.1 0.078 -0.416 8
0.11 0.091 -0.492 9
0.125 0.103 -0.486 8
0.129 0.13 -0.407 8
0.125 0.178 -0.307 9
0.132 0.24 -0.238 8
0.119 0.216 -0.214 7
0.131 0.29 -0.156 10
0.138 0.364 -0.087 8
0.142 0.419 -0.006 9
0.132 0.461 0.074 8
0.108 0.52 0.133 9
0.098 0.537 0.179 8
0.101 0.475 0.214 8
0.091 0.428 0.193 9
0.059 0.342 0.222 8
-0.032 0.265 0.252 9
-0.126 0.184 0.264 8
-0.175 0.118 0.218 7
-0.192 0.089 0.1 10
-0.195 0.11 -0.021 8
-0.175 0.099 -0.019 9
-0.179 0.136 -0.094 8
-0.17 0.174 -0.124 8
-0.138 0.226 -0.099 9
-0.073 0.262 -0.035 8
0.024 0.275 0.039 8
0.118 0.288 0.088 9
0.106 0.259 0.079 8
0.17 0.285 0.067 9
0.2 0.293 -0.002 6
0.203 0.285 -0.092 10
0.192 0.287 -0.166 9
0.174 0.295 -0.208 8
0.154 0.293 -0.206 9
0.139 0.264 -0.186 8
0.133 0.245 -0.168 8
0.132 0.217 -0.162 9
0.118 0.192 -0.143 8
0.094 0.171 -0.071 9
0.076 0.138 0.056 8
0.046 0.101 0.187 8
0.041 0.091 0.168 7
-0.012 0.079 0.244 10
-0.052 0.088 0.258 9
-0.077 0.096 0.232 8
-0.132 0.11 0.194 8
-0.24 0.146 0.152 9
-0.374 0.192 0.135 8
-0.336 0.173 0.121 9
-0.426 0.213 0.141 8
-0.443 0.221 0.165 8
-0.422 0.171 0.181 9
-0.387 0.099 0.186 8
-0.322 0.043 0.185 7
-0.24 -0.004 0.186 10
-0.216 -0.003 0.167 8
-0.165 -0.043 0.153 9
-0.136 -0.073 0.124 8
-0.104 -0.101 0.091 8
-0.016 -0.166 0.024 9
0.13 -0.271 -0.047 8
0.258 -0.352 -0.059 9
0.232 -0.317 -0.053 8
0.285 -0.356 -0.031 8
0.251 -0.371 -0.026 9
0.157 -0.372 -0.026 7
0.02 -0.33 0.001 10
-0.113 -0.267 0.044 8
-0.202 -0.185 0.076 8
-0.182 -0.167 0.068 9
-0.211 -0.031 0.096 8
-0.188 0.094 0.128 9
-0.136 0.176 0.151 8
-0.072 0.216 0.214 8
-0.038 0.221 0.33 9
-0.029 0.209 0.431 8
-0.026 0.188 0.388 9
-0.046 0.18 0.526 6
-0.161 0.176 0.686 10
-0.31 0.196 0.782 9
-0.402 0.25 0.829 8
-0.424 0.262 0.873 8
-0.384 0.223 0.873 9
-0.346 0.201 0.785 8
-0.282 0.169 0.684 9
-0.225 0.136 0.541 8
-0.176 0.098 0.417 8
-0.106 0.07 0.3 9
-0.026 0.048 0.227 8
-0.024 0.043 0.204 7
0.033 0.03 0.201 10
0.046 0.024 0.222 8
-0.021 0.014 0.276 9
-0.136 0.004 0.414 8
-0.242 -0.021 0.604 9
-0.352 -0.081 0.714 8
-0.46 -0.176 0.719 8
-0.414 -0.158 0.647 9
-0.48 -0.299 0.585 8
-0.495 -0.448 0.421 9
-0.502 -0.52 0.163 8
-0.541 -0.518 -0.061 7
-0.591 -0.48 -0.168 10
-0.592 -0.439 -0.209 8
-0.533 -0.449 -0.212 9
-0.456 -0.404 -0.191 8
-0.323 -0.45 -0.168 8
-0.198 -0.492 -0.091 9
-0.118 -0.53 0.067 8
-0.066 -0.551 0.215 8
0.0 -0.56 0.188 9
0.087 -0.563 0.032 8
0.079 -0.507 0.029 9
0.143 -0.473 -0.114 6
0.156 -0.372 -0.37 10
0.147 -0.195 -0.729 9
0.158 -0.014 -0.966 8
0.177 0.137 -1.064 9
0.175 0.335 -1.113 8
0.158 0.302 -1.001 8
0.163 0.485 -1.007 9
0.198 0.532 -0.905 8
0.247 0.424 -0.729 9
0.274 0.262 -0.565 8
0.246 0.196 -0.417 8
0.222 0.176 -0.375 7
0.143 0.164 -0.24 10
0.071 0.09 -0.17 9
0.065 -0.032 -0.168 8
0.094 -0.168 -0.193 8
0.093 -0.286 -0.219 9
0.078 -0.37 -0.231 8
0.091 -0.464 -0.237 8
0.082 -0.418 -0.213 9
0.098 -0.556 -0.207 8
0.094 -0.676 -0.184 9
0.074 -0.729 -0.163 8
0.055 -0.728 -0.144 7
0.06 -0.724 -0.102 10
0.08 -0.77 0.06 8
0.072 -0.693 0.054 9
0.095 -0.711 0.278 8
0.152 -0.57 0.384 8
0.278 -0.371 0.366 9
0.434 -0.244 0.227 8
0.559 -0.157 0.018 9
0.595 -0.077 -0.154 8
0.535 -0.069 -0.139 8
0.466 0.021 -0.284 9
0.333 0.124 -0.396 6
0.173 0.214 -0.488 11
0.015 0.329 -0.662 8
-0.108 0.497 -0.925 8
-0.179 0.675 -1.17 9
-0.161 0.607 -1.053 8
-0.165 0.698 -1.144 9
-0.119 0.688 -1.035 8
-0.064 0.65 -0.819 8
-0.016 0.584 -0.572 9
0.021 0.46 -0.264 8
0.012 0.335 0.044 8
0.011 0.302 0.039 7
-0.071 0.295 0.254 10
-0.204 0.388 0.405 9
-0.337 0.495 0.491 8
-0.431 0.567 0.506 8
-0.471 0.589 0.48 9
-0.459 0.568 0.441 8
-0.413 0.511 0.397 9
-0.353 0.446 0.355 8
-0.253 0.342 0.295 8
-0.145 0.215 0.211 9
-0.058 0.08 0.12 8
-0.002 -0.041 0.014 7
0.025 -0.109 -0.15 10
0.023 -0.098 -0.135 8
0.028 -0.09 -0.342 9
0.01 -0.04 -0.495 8
-0.009 0.011 -0.553 9
-0.002 0.042 -0.537 8
0.047 -0.004 -0.435 8
0.128 -0.131 -0.231 9
0.115 -0.118 -0.208 8
0.189 -0.206 0.009 8
0.229 -0.207 0.146 9
0.249 -0.189 0.207 7
0.238 -0.188 0.252 10
0.178 -0.149 0.308 8
0.1 -0.073 0.35 8
0.09 -0.066 0.315 9
0.028 -0.009 0.334 8
-0.011 0.019 0.333 9
-0.024 0.038 0.315 8
-0.01 0.02 0.279 8
0.017 0.017 0.222 9
0.027 0.016 0.19 8
0.024 0.015 0.171 9
0.0 -0.008 0.18 6
-0.054 0.076 0.207 10
-0.151 0.224 0.223 9
-0.231 0.32 0.201 8
-0.282 0.361 0.172 9
-0.271 0.367 0.14 8
-0.244 0.33 0.126 8
-0.127 0.278 0.093 9
0.0 0.187 0.037 8
0.072 0.133 -0.049 9
0.078 0.144 -0.123 8
0.051 0.179 -0.134 8
0.046 0.161 -0.121 7
0.025 0.175 -0.093 10
0.014 0.157 -0.053 8
0.011 0.13 -0.008 9
0.01 0.095 0.03 8
0.008 0.049 0.05 9
0.016 -0.001 0.064 8
0.023 -0.03 0.07 8
0.02 -0.027 0.063 9
0.025 -0.016 0.055 8
0.032 -0.001 0.032 9
0.038 -0.018 -0.007 8
0.031 -0.029 -0.038 7
0.002 -0.012 -0.045 10
-0.052 0.025 -0.017 8
-0.047 0.022 -0.016 9
-0.113 0.058 0.029 8
-0.125 0.078 0.045 8
-0.079 0.072 0.004 9
-0.002 0.002 -0.152 8
0.145 -0.147 -0.301 9
0.218 -0.237 -0.299 8
0.196 -0.213 -0.269 8
0.117 -0.133 -0.178 9
0.055 -0.023 -0.028 6
0.031 0.037 0.106 11
0.029 0.083 0.177 8
0.07 0.119 0.198 8
0.131 0.122 0.183 9
0.118 0.11 0.165 8
0.146 0.094 0.136 8
0.128 0.076 0.069 9
0.094 0.055 -0.049 8
0.061 0.037 -0.223 9
0.011 0.036 -0.409 8
-0.054 0.074 -0.521 8
-0.048 0.067 -0.469 7
-0.113 0.114 -0.467 10
-0.158 0.139 -0.375 9
# end
#Thu Feb 26 20:22:51 GMT+08:00 2015
