# Supplementary material for: Abnormal Gait Behavior Detection for Elderly Based on Enhanced Wigner-Ville Analysis and Cloud Incremental SVM Learning
Source: Hindawi journal article supplement (doi:10.1155/2016/5869238), 2016-01-01
Supplement: f1 [file 5869238.f1.zip › Supplementary Materials/Original Data/Climbing three steps/original__35.txt]

# Accelerometer Values
# filename:  original__35.txt
# Saving start time: Thu Feb 26 20:22:52 GMT+08:00 2015

# sensor resolution: 0.0095825195m/s^2
#Sensorvendor: KIONIX, name: KX023 Accelerometer, type: 1,version : 1, range 39.240005

# X value, Y value, Z value, time diff in ms
-0.032 0.038 -0.291 8
-0.072 0.064 -0.283 9
-0.097 0.091 -0.225 8
-0.097 0.098 -0.114 8
-0.054 0.08 0.013 9
0.009 0.04 0.125 8
0.049 0.0 0.204 8
0.044 0.0 0.183 7
0.044 -0.019 0.217 10
0.024 0.004 0.217 9
0.027 0.025 0.192 8
0.046 -0.014 0.169 8
0.034 -0.045 0.16 9
-0.014 -0.011 0.13 8
-0.012 -0.009 0.117 9
-0.06 0.032 0.023 8
-0.054 0.038 -0.112 8
-0.012 0.026 -0.234 9
0.016 0.02 -0.304 8
0.032 0.023 -0.292 7
0.059 0.009 -0.224 10
0.053 0.008 -0.202 8
0.087 -0.022 -0.103 9
0.101 -0.048 0.003 8
0.086 -0.061 0.097 9
0.041 -0.049 0.16 8
-0.01 -0.029 0.196 8
-0.043 -0.031 0.201 9
-0.039 -0.028 0.181 8
-0.046 -0.042 0.143 8
-0.022 -0.067 0.072 9
0.019 -0.112 -0.009 7
0.055 -0.13 -0.089 10
0.073 -0.092 -0.137 8
0.064 -0.026 -0.141 8
0.057 -0.023 -0.127 9
0.034 0.028 -0.123 8
0.019 0.054 -0.123 9
0.004 0.071 -0.111 8
-0.018 0.082 -0.086 8
-0.041 0.088 -0.047 9
-0.035 0.08 -0.012 8
-0.031 0.072 -0.011 9
0.009 0.04 -0.013 6
0.05 0.007 -0.046 10
0.065 0.007 -0.05 9
0.058 0.035 -0.014 8
0.043 0.06 0.036 9
0.039 0.072 0.074 8
0.035 0.065 0.067 8
0.04 0.071 0.062 9
0.06 0.065 0.05 8
0.086 0.028 0.038 9
0.112 -0.027 0.006 8
0.125 -0.075 -0.022 8
0.113 -0.067 -0.02 7
0.112 -0.137 -0.035 10
0.106 -0.229 -0.051 8
0.091 -0.29 -0.076 9
0.05 -0.272 -0.127 8
-0.002 -0.2 -0.162 9
-0.038 -0.143 -0.169 8
-0.055 -0.097 -0.152 8
-0.049 -0.087 -0.137 9
-0.059 -0.031 -0.09 8
-0.11 0.036 -0.032 9
-0.22 0.089 0.035 8
-0.329 0.107 0.094 7
-0.388 0.079 0.111 10
-0.4 0.001 0.097 8
-0.36 0.001 0.087 9
-0.355 -0.064 0.078 8
-0.343 -0.082 0.064 8
-0.325 -0.077 0.075 9
-0.306 -0.073 0.129 8
-0.275 -0.048 0.16 9
-0.218 -0.026 0.163 8
-0.196 -0.023 0.147 8
-0.16 -0.016 0.157 9
-0.144 -0.002 0.124 6
-0.102 0.011 -0.003 10
-0.028 0.035 -0.231 9
0.047 0.069 -0.465 8
0.101 0.095 -0.657 9
0.09 0.086 -0.861 8
0.122 0.119 -0.775 8
0.152 0.172 -0.956 9
0.186 0.242 -1.062 8
0.202 0.303 -1.009 9
0.2 0.313 -0.726 8
0.196 0.29 -0.359 8
0.177 0.261 -0.323 7
0.177 0.251 0.021 10
0.179 0.245 0.317 9
0.174 0.243 0.508 8
0.164 0.257 0.561 8
0.166 0.267 0.473 9
0.185 0.238 0.294 8
0.21 0.138 0.129 9
0.189 0.124 0.116 8
0.196 0.005 0.026 8
0.173 -0.088 0.027 9
0.134 -0.198 0.058 8
0.096 -0.33 0.04 7
0.064 -0.439 -0.019 10
0.035 -0.521 -0.097 8
0.031 -0.469 -0.087 9
0.025 -0.544 -0.163 8
0.045 -0.595 -0.26 8
0.074 -0.601 -0.374 9
0.12 -0.555 -0.481 8
0.187 -0.464 -0.542 9
0.238 -0.357 -0.495 8
0.214 -0.321 -0.446 8
0.238 -0.216 -0.28 9
0.215 -0.088 -0.107 7
0.132 0.059 -0.014 10
0.027 0.202 0.047 8
-0.048 0.32 0.139 8
-0.1 0.429 0.276 9
-0.09 0.386 0.248 8
-0.12 0.524 0.403 9
-0.135 0.665 0.539 8
-0.156 0.792 0.643 8
-0.177 0.877 0.694 9
-0.171 0.908 0.69 8
-0.13 0.951 0.685 9
-0.117 0.856 0.616 6
-0.059 0.945 0.704 10
0.018 1.056 0.87 9
0.131 1.156 1.021 8
0.248 1.212 1.124 8
0.332 1.213 1.169 9
0.348 1.163 1.185 8
0.313 1.047 1.066 9
0.239 0.986 1.057 8
0.103 0.927 1.062 8
-0.044 0.915 1.091 9
-0.153 0.91 1.08 8
-0.19 0.852 1.067 7
-0.167 0.733 0.968 10
-0.15 0.659 0.871 8
-0.052 0.518 0.588 9
0.163 0.325 0.194 8
0.442 0.028 -0.105 9
0.706 -0.296 -0.254 8
0.939 -0.516 -0.293 8
1.099 -0.616 -0.16 9
0.989 -0.555 -0.144 8
1.081 -0.649 0.145 9
1.115 -0.78 0.531 8
1.086 -0.945 0.894 7
0.966 -1.074 1.097 10
0.782 -1.113 1.123 8
0.596 -1.124 0.973 9
0.537 -1.012 0.875 8
0.414 -1.098 0.522 8
0.384 -1.24 0.059 9
0.385 -1.362 -0.364 8
0.287 -1.406 -0.697 9
0.078 -1.372 -0.91 8
-0.106 -1.309 -1.001 8
-0.096 -1.178 -0.901 9
-0.206 -1.146 -0.9 6
-0.273 -1.108 -0.856 10
-0.316 -1.102 -0.758 9
-0.365 -1.146 -0.684 8
-0.425 -1.121 -0.697 9
-0.469 -1.019 -0.758 8
-0.422 -0.917 -0.682 8
-0.44 -0.834 -0.812 9
-0.446 -0.783 -0.974 8
-0.471 -0.725 -1.11 9
-0.496 -0.65 -1.191 8
-0.511 -0.578 -1.259 8
-0.46 -0.52 -1.133 7
-0.46 -0.481 -1.223 10
-0.405 -0.479 -1.259 9
-0.307 -0.547 -1.131 8
-0.182 -0.667 -0.85 8
-0.079 -0.747 -0.512 9
-0.069 -0.76 -0.205 8
-0.121 -0.722 -0.026 8
-0.109 -0.65 -0.023 9
-0.138 -0.597 0.026 8
-0.124 -0.544 0.024 9
-0.106 -0.499 -0.01 8
-0.129 -0.447 -0.053 7
-0.185 -0.38 -0.088 10
-0.217 -0.296 -0.148 8
-0.195 -0.266 -0.133 9
-0.179 -0.125 -0.22 8
-0.149 0.069 -0.285 8
-0.12 0.26 -0.312 9
-0.06 0.435 -0.289 8
0.018 0.578 -0.171 9
0.087 0.665 0.052 8
0.078 0.599 0.046 8
0.141 0.671 0.239 9
0.205 0.758 0.307 7
0.26 0.899 0.311 10
0.318 1.072 0.28 8
0.359 1.18 0.208 8
0.36 1.269 0.15 9
0.324 1.142 0.135 8
0.29 1.283 0.202 9
0.242 1.394 0.349 8
0.195 1.446 0.553 8
0.125 1.445 0.864 9
0.012 1.391 1.164 8
-0.093 1.306 1.453 8
-0.083 1.175 1.307 7
-0.141 1.095 1.601 10
-0.179 1.028 1.673 9
-0.207 0.974 1.394 8
-0.214 0.931 0.936 8
-0.244 0.887 0.487 9
-0.336 0.864 0.061 8
-0.302 0.778 0.055 9
-0.466 0.795 -0.264 8
-0.681 0.775 -0.348 8
-0.941 0.648 -0.161 9
-1.147 0.455 0.145 8
-1.29 0.291 0.418 7
-1.446 0.167 0.696 10
-1.302 0.15 0.627 8
-1.41 0.0 0.94 9
-1.394 -0.177 1.184 8
-1.263 -0.34 1.322 9
-1.036 -0.494 1.34 8
-0.762 -0.621 1.226 8
-0.535 -0.745 1.031 9
-0.482 -0.671 0.928 8
-0.367 -0.831 0.71 9
-0.373 -0.969 0.46 8
-0.388 -1.072 0.2 7
-0.318 -1.178 0.007 10
-0.249 -1.294 -0.165 8
-0.237 -1.365 -0.347 9
-0.213 -1.229 -0.312 8
-0.196 -1.221 -0.538 8
-0.124 -1.172 -0.849 9
-0.042 -1.137 -1.1 8
0.027 -1.101 -1.236 8
0.132 -1.004 -1.314 9
0.273 -0.874 -1.321 8
0.245 -0.786 -1.188 9
0.349 -0.68 -1.137 6
0.384 -0.566 -1.031 10
0.391 -0.452 -0.878 9
0.419 -0.359 -0.7 8
0.484 -0.259 -0.545 9
0.561 -0.136 -0.441 8
0.505 -0.123 -0.397 8
0.574 -0.031 -0.331 9
0.6 0.021 -0.287 8
0.561 0.079 -0.263 9
0.46 0.127 -0.262 8
0.337 0.133 -0.266 8
0.303 0.119 -0.239 7
0.191 0.092 -0.221 10
0.08 0.056 -0.183 9
0.002 0.005 -0.144 8
0.011 -0.087 -0.112 8
0.102 -0.216 -0.089 9
0.211 -0.345 -0.056 8
0.29 -0.498 -0.023 8
0.261 -0.448 -0.02 9
0.311 -0.61 -0.019 8
0.35 -0.709 -0.039 9
0.377 -0.725 -0.068 8
0.377 -0.686 -0.143 7
0.348 -0.59 -0.294 10
0.292 -0.421 -0.506 8
0.263 -0.379 -0.455 9
0.211 -0.19 -0.643 8
0.167 -0.028 -0.753 8
0.129 0.105 -0.824 9
0.097 0.235 -0.8 8
0.052 0.361 -0.671 9
0.001 0.464 -0.526 8
0.0 0.417 -0.473 8
-0.039 0.529 -0.323 9
-0.07 0.644 -0.137 6
-0.091 0.74 0.036 11
-0.151 0.874 0.168 8
-0.281 1.022 0.303 8
-0.403 1.099 0.419 9
-0.362 0.989 0.485 8
-0.419 1.027 0.437 9
-0.39 1.072 0.517 8
-0.294 1.126 0.616 8
-0.167 1.179 0.694 9
-0.032 1.208 0.702 8
0.089 1.208 0.699 8
0.08 1.087 0.629 7
0.167 1.064 0.734 10
0.21 1.0 0.851 9
0.233 0.927 0.894 8
0.237 0.857 0.941 8
0.224 0.787 0.995 9
0.213 0.72 0.95 8
0.217 0.652 0.783 9
0.195 0.587 0.705 8
0.209 0.531 0.544 8
0.233 0.479 0.435 9
0.287 0.43 0.345 8
0.38 0.387 0.227 7
0.546 0.334 0.085 10
0.748 0.249 -0.019 8
0.673 0.224 -0.017 9
0.902 0.128 -0.024 8
1.132 0.029 0.065 9
1.282 -0.113 0.215 8
1.338 -0.301 0.466 8
1.318 -0.464 0.796 9
1.247 -0.602 1.066 8
1.122 -0.541 0.959 8
1.018 -0.71 1.146 9
0.833 -0.852 1.227 7
0.566 -0.927 1.162 10
0.264 -0.96 0.965 8
0.035 -0.986 0.632 8
-0.058 -0.992 0.128 9
-0.052 -0.892 0.115 8
-0.047 -0.884 -0.438 9
-0.009 -0.873 -0.854 8
0.0 -0.86 -1.036 8
-0.011 -0.849 -0.982 9
-0.014 -0.88 -0.798 8
0.017 -0.938 -0.644 9
0.016 -0.844 -0.58 6
0.086 -0.891 -0.541 10
0.103 -0.869 -0.547 9
0.0 -0.75 -0.57 8
-0.144 -0.565 -0.656 9
-0.254 -0.38 -0.741 8
-0.339 -0.231 -0.766 8
-0.305 -0.208 -0.69 9
-0.376 -0.109 -0.687 8
-0.419 -0.054 -0.664 9
-0.456 -0.029 -0.658 8
-0.46 -0.016 -0.676 8
-0.386 -0.019 -0.635 7
-0.314 -0.062 -0.536 10
-0.282 -0.055 -0.482 8
-0.286 -0.097 -0.416 9
-0.313 -0.105 -0.41 8
-0.316 -0.123 -0.428 9
-0.305 -0.157 -0.437 8
-0.311 -0.186 -0.422 8
-0.336 -0.189 -0.35 9
-0.302 -0.17 -0.315 8
-0.336 -0.16 -0.209 9
-0.333 -0.162 -0.169 8
-0.268 -0.178 -0.171 7
-0.188 -0.264 -0.12 10
-0.134 -0.402 -0.043 8
-0.126 -0.481 0.004 9
-0.113 -0.432 0.003 8
-0.139 -0.409 0.008 8
-0.167 -0.325 -0.054 9
-0.177 -0.217 -0.22 8
-0.165 -0.088 -0.444 9
-0.168 0.046 -0.618 8
-0.207 0.171 -0.682 8
-0.186 0.154 -0.614 9
-0.233 0.25 -0.611 6
-0.223 0.303 -0.562 11
-0.142 0.319 -0.497 8
-0.036 0.32 -0.455 8
0.055 0.313 -0.416 9
0.12 0.313 -0.362 8
0.108 0.282 -0.325 8
0.111 0.323 -0.296 9
0.097 0.415 -0.259 8
0.143 0.483 -0.163 9
0.215 0.501 -0.041 8
0.264 0.508 0.032 8
0.237 0.457 0.029 7
0.244 0.449 0.039 10
0.232 0.439 0.01 9
0.213 0.43 0.007 8
0.175 0.44 0.094 8
0.146 0.5 0.198 9
0.127 0.555 0.285 8
0.108 0.589 0.369 9
0.097 0.53 0.332 8
0.094 0.566 0.401 8
0.08 0.577 0.439 9
0.074 0.576 0.433 8
0.103 0.571 0.4 7
0.149 0.572 0.367 10
0.192 0.569 0.342 8
0.173 0.512 0.308 9
0.204 0.488 0.292 8
0.217 0.49 0.275 8
0.217 0.492 0.256 9
0.211 0.441 0.273 8
0.193 0.396 0.368 9
0.142 0.402 0.517 8
0.127 0.362 0.465 8
0.029 0.413 0.673 9
-0.132 0.482 0.856 7
-0.314 0.541 0.921 10
-0.459 0.588 0.892 8
-0.573 0.614 0.804 8
-0.639 0.6 0.688 9
-0.575 0.54 0.619 8
-0.599 0.512 0.528 9
-0.619 0.471 0.493 8
-0.68 0.428 0.503 8
-0.796 0.39 0.603 9
-0.934 0.338 0.802 8
-1.019 0.242 0.986 9
-0.917 0.217 0.887 6
-0.905 0.081 0.977 10
-0.79 -0.058 0.976 9
-0.637 -0.214 0.946 8
-0.484 -0.378 0.908 9
-0.328 -0.51 0.859 8
-0.186 -0.66 0.796 8
-0.167 -0.594 0.716 9
-0.05 -0.797 0.648 8
-0.004 -0.979 0.529 8
-0.054 -1.086 0.339 9
-0.236 -1.111 0.162 8
-0.478 -1.079 0.011 7
-0.65 -1.04 -0.172 10
-0.585 -0.936 -0.155 8
-0.621 -0.958 -0.322 9
-0.537 -1.029 -0.37 8
-0.44 -1.082 -0.329 9
-0.323 -1.113 -0.319 8
-0.159 -1.12 -0.367 8
0.023 -1.134 -0.488 9
0.02 -1.021 -0.439 8
0.146 -0.964 -0.733 9
0.213 -0.781 -0.974 8
0.244 -0.62 -0.961 7
0.266 -0.442 -0.865 10
0.303 -0.218 -0.804 8
0.363 -0.03 -0.751 9
0.327 -0.027 -0.698 8
0.414 0.086 -0.628 8
0.515 0.147 -0.626 9
0.61 0.191 -0.641 8
0.639 0.217 -0.641 8
0.583 0.207 -0.689 9
0.478 0.178 -0.828 8
0.43 0.16 -0.968 9
0.3 0.144 -0.871 6
0.149 0.135 -0.894 10
-0.013 0.11 -0.755 9
-0.155 0.067 -0.506 8
-0.203 0.0 -0.266 9
-0.137 -0.112 -0.07 8
-0.123 -0.101 0.13 8
-0.021 -0.257 0.117 9
0.05 -0.377 0.282 8
0.076 -0.439 0.408 9
0.08 -0.522 0.458 8
0.104 -0.623 0.352 8
0.094 -0.56 0.317 7
0.145 -0.621 0.116 10
0.237 -0.587 -0.046 9
0.361 -0.441 -0.113 8
0.484 -0.247 -0.09 8
0.593 -0.108 0.027 9
0.626 -0.027 0.154 8
0.566 0.041 0.175 9
0.509 0.036 0.157 8
0.441 0.11 0.045 8
0.382 0.199 -0.11 9
0.303 0.298 -0.241 8
0.225 0.389 -0.44 7
0.176 0.495 -0.708 10
0.158 0.593 -0.942 8
0.142 0.534 -0.848 9
0.144 0.589 -0.938 8
0.124 0.621 -0.862 8
0.062 0.633 -0.651 9
-0.029 0.624 -0.357 8
-0.148 0.607 -0.077 9
-0.252 0.577 0.129 8
-0.227 0.519 0.116 8
-0.29 0.511 0.245 9
-0.322 0.525 0.353 7
-0.32 0.505 0.4 10
-0.282 0.433 0.34 8
-0.227 0.336 0.236 8
-0.169 0.235 0.098 9
-0.152 0.211 0.088 8
-0.117 0.131 -0.07 9
-0.108 0.078 -0.174 8
-0.111 0.034 -0.198 8
-0.11 0.009 -0.188 9
-0.095 0.006 -0.175 8
-0.065 0.025 -0.166 9
-0.058 0.022 -0.149 6
-0.003 0.046 -0.129 10
0.054 0.075 -0.103 9
0.108 0.12 -0.069 8
0.164 0.141 0.01 8
0.208 0.137 0.116 9
0.235 0.118 0.192 8
0.212 0.106 0.172 9
0.236 0.063 0.214 8
0.27 0.004 0.229 8
0.283 -0.035 0.232 9
0.241 -0.037 0.262 8
0.178 -0.024 0.321 7
0.124 0.018 0.321 10
0.112 0.016 0.289 8
0.085 0.072 0.209 9
0.086 0.078 0.116 8
0.098 0.047 0.044 9
0.102 0.011 -0.012 8
0.078 -0.044 -0.07 8
0.032 -0.093 -0.13 9
0.029 -0.084 -0.117 8
-0.042 -0.111 -0.167 9
-0.135 -0.111 -0.197 8
-0.209 -0.076 -0.225 7
-0.237 -0.034 -0.245 10
-0.233 0.02 -0.256 8
-0.219 0.099 -0.261 9
-0.197 0.089 -0.235 8
-0.181 0.132 -0.174 8
-0.161 0.134 -0.054 9
-0.147 0.123 0.051 8
-0.146 0.104 0.12 8
-0.151 0.114 0.153 9
-0.153 0.141 0.163 8
-0.138 0.127 0.146 9
-0.144 0.185 0.144 6
-0.141 0.263 0.14 10
-0.116 0.289 0.131 9
-0.059 0.287 0.105 8
0.049 0.278 0.06 9
0.162 0.164 0.048 8
0.145 0.147 0.043 8
0.185 0.036 0.068 9
0.136 0.049 0.075 8
0.074 0.065 0.068 9
0.036 0.027 0.057 8
-0.006 0.004 0.052 8
-0.006 0.003 0.047 7
-0.044 0.015 0.079 10
-0.057 0.013 0.071 9
-0.049 -0.07 0.158 8
-0.045 -0.064 0.24 8
-0.023 -0.022 0.213 9
0.042 -0.008 0.104 8
0.126 -0.027 -0.001 8
0.113 -0.024 -0.119 9
0.147 -0.021 -0.107 8
0.085 -0.086 -0.24 9
-0.04 -0.002 -0.375 8
-0.157 0.112 -0.473 7
-0.223 0.155 -0.479 10
-0.239 0.147 -0.389 8
-0.215 0.132 -0.22 9
-0.193 0.119 -0.198 8
-0.136 0.102 -0.013 8
-0.072 0.052 0.113 9
-0.039 0.025 0.194 8
-0.033 0.058 0.247 9
-0.031 0.087 0.267 8
-0.028 0.078 0.268 8
-0.02 0.07 0.241 9
-0.002 0.023 0.218 6
0.008 0.015 0.167 11
0.005 0.015 0.108 8
0.007 0.024 0.02 8
0.016 0.044 -0.123 9
0.015 0.04 -0.111 8
0.008 0.068 -0.1 9
-0.014 0.103 -0.416 8
-0.038 0.137 -0.487 8
-0.046 0.148 -0.485 9
-0.024 0.13 -0.382 8
0.002 0.082 -0.205 8
0.002 0.074 -0.184 7
0.008 0.003 -0.019 10
-0.003 -0.069 0.11 9
-0.024 -0.122 0.196 8
-0.041 -0.155 0.229 8
-0.042 -0.178 0.229 9
-0.035 -0.187 0.21 8
-0.031 -0.168 0.189 9
-0.023 -0.163 0.17 8
-0.008 -0.125 0.063 8
0.002 -0.057 -0.05 9
-0.001 0.012 -0.149 8
-0.005 0.057 -0.174 7
0.006 0.074 -0.113 10
0.005 0.066 -0.015 8
0.02 0.07 -0.013 9
0.045 0.06 0.07 8
0.106 0.033 0.104 8
0.186 0.001 0.089 9
0.24 -0.022 0.057 8
0.226 -0.019 0.022 9
0.203 -0.017 0.02 8
0.125 0.014 -0.036 8
0.031 0.056 -0.103 9
-0.032 0.091 -0.153 7
-0.058 0.121 -0.186 10
-0.056 0.132 -0.184 8
-0.024 0.11 -0.158 8
-0.021 0.099 -0.143 9
0.024 0.061 -0.117 8
0.077 0.012 -0.079 9
0.111 -0.049 -0.015 8
0.092 -0.102 0.071 8
0.051 -0.115 0.15 9
0.013 -0.079 0.178 8
0.012 -0.071 0.16 9
-0.004 -0.049 0.144 6
0.015 -0.057 0.109 10
0.03 -0.024 0.06 9
0.008 0.011 0.039 8
-0.054 0.036 0.028 9
-0.113 0.089 -0.014 8
-0.102 0.08 -0.012 8
-0.116 0.112 -0.05 9
-0.098 0.089 -0.019 8
-0.07 0.04 0.048 9
-0.056 0.0 0.088 8
-0.059 -0.035 0.102 8
-0.053 -0.032 0.092 7
-0.061 -0.038 0.08 10
-0.066 -0.029 0.082 8
-0.083 -0.028 0.102 9
-0.117 0.023 0.102 8
-0.153 0.095 0.08 9
-0.148 0.126 0.03 8
-0.087 0.094 -0.025 8
-0.078 0.084 -0.022 9
-0.007 0.003 -0.047 8
0.027 -0.035 -0.067 9
0.028 -0.015 -0.12 8
0.025 0.006 -0.198 7
0.026 0.033 -0.25 10
0.016 0.049 -0.224 8
0.015 0.044 -0.202 9
-0.005 0.055 -0.116 8
-0.036 0.07 -0.011 8
-0.056 0.069 0.081 9
-0.063 0.06 0.127 8
-0.064 0.047 0.108 9
-0.055 0.021 0.067 8
-0.049 0.019 0.06 8
-0.038 0.0 -0.001 9
-0.027 -0.01 -0.078 6
-0.014 -0.023 -0.125 10
0.0 -0.034 -0.112 9
0.014 -0.032 -0.027 8
0.024 -0.024 0.055 9
0.022 -0.022 0.05 8
0.029 -0.018 0.088 8
0.026 0.003 0.098 9
0.006 0.031 0.088 8
-0.031 0.048 0.047 9
-0.068 0.062 0.006 8
-0.089 0.06 -0.022 8
-0.08 0.054 -0.02 7
-0.075 0.034 -0.038 10
-0.048 -0.003 -0.062 9
-0.028 -0.035 -0.114 8
-0.017 -0.05 -0.167 8
-0.008 -0.063 -0.176 9
-0.001 -0.064 -0.146 8
-0.001 -0.058 -0.131 9
0.0 -0.048 -0.081 8
-0.006 -0.039 -0.004 8
-0.025 -0.027 0.075 9
-0.047 -0.002 0.111 8
-0.055 0.027 0.095 7
-0.047 0.035 0.061 10
-0.042 0.031 0.055 8
-0.02 0.021 0.029 9
0.0 0.012 0.018 8
0.008 0.004 0.011 8
0.004 -0.001 0.003 9
-0.009 -0.003 -0.006 8
-0.031 0.003 -0.003 9
-0.027 0.003 -0.003 8
-0.048 0.021 0.013 8
-0.06 0.037 0.024 9
-0.058 0.051 -0.002 7
-0.042 0.063 -0.057 10
-0.009 0.056 -0.096 8
0.025 0.02 -0.1 8
0.023 0.018 -0.09 9
0.05 -0.032 -0.026 8
0.055 -0.074 0.09 9
0.036 -0.083 0.183 8
0.003 -0.048 0.217 8
-0.019 -0.046 0.16 9
0.005 -0.079 0.114 8
0.004 -0.071 0.102 9
0.005 -0.041 0.1 6
-0.018 0.032 0.048 10
0.007 0.052 0.022 9
0.041 0.034 0.067 8
0.049 0.045 0.118 9
0.048 0.057 0.135 8
0.043 0.052 0.121 8
0.06 0.022 0.121 9
0.074 -0.036 0.096 8
0.058 -0.078 0.008 8
0.022 -0.09 -0.136 9
-0.024 -0.057 -0.271 8
-0.021 -0.051 -0.244 7
-0.068 0.0 -0.344 10
# end
#Thu Feb 26 20:22:58 GMT+08:00 20152
