# Supplementary material for: Abnormal Gait Behavior Detection for Elderly Based on Enhanced Wigner-Ville Analysis and Cloud Incremental SVM Learning
Source: Hindawi journal article supplement (doi:10.1155/2016/5869238), 2016-01-01
Supplement: f1 [file 5869238.f1.zip › Supplementary Materials/Original Data/Climbing three steps/original__36.txt]

# Accelerometer Values
# filename:  original__36.txt
# Saving start time: Thu Feb 26 20:23:00 GMT+08:00 2015

# sensor resolution: 0.0095825195m/s^2
#Sensorvendor: KIONIX, name: KX023 Accelerometer, type: 1,version : 1, range 39.240005

# X value, Y value, Z value, time diff in ms
0.22 -0.033 -0.169 10
0.149 -0.006 -0.199 8
0.134 -0.005 -0.2 8
0.058 -0.004 -0.18 9
0.024 0.061 -0.19 8
0.046 0.049 -0.233 9
0.058 0.0 -0.264 8
0.011 -0.057 -0.251 8
-0.066 -0.091 -0.193 9
-0.06 -0.082 -0.173 8
-0.12 -0.101 -0.156 9
-0.164 -0.108 -0.02 6
-0.193 -0.083 -0.051 10
-0.185 -0.068 -0.128 9
-0.154 -0.094 -0.143 8
-0.141 -0.109 -0.059 8
-0.127 -0.075 0.083 9
-0.114 -0.068 0.075 8
-0.203 -0.03 0.217 9
-0.215 -0.033 0.306 8
-0.214 -0.026 0.331 8
-0.227 0.015 0.308 9
-0.255 0.046 0.256 8
-0.229 0.041 0.23 7
-0.245 0.04 0.163 10
-0.242 0.034 0.094 8
-0.229 0.047 0.046 9
-0.194 0.044 0.026 8
-0.152 0.026 0.043 9
-0.142 0.026 0.066 8
-0.128 0.024 0.06 8
-0.161 0.033 0.054 9
-0.192 0.034 0.015 8
-0.21 0.028 -0.02 9
-0.239 0.028 -0.046 8
-0.28 0.067 -0.088 7
-0.326 0.122 -0.218 10
-0.294 0.109 -0.196 8
-0.309 0.139 -0.176 9
-0.271 0.135 -0.5 8
-0.21 0.101 -0.505 8
-0.152 0.065 -0.448 9
-0.103 0.055 -0.329 8
-0.046 0.052 -0.135 8
-0.042 0.047 -0.122 9
0.005 0.048 0.107 8
0.014 0.067 0.293 9
0.011 0.087 0.379 6
0.036 0.09 0.389 10
0.094 0.075 0.355 9
0.152 0.054 0.313 8
0.137 0.049 0.282 9
0.168 0.035 0.26 8
0.184 0.024 0.237 8
0.197 0.011 0.182 9
0.203 -0.001 0.087 8
0.187 -0.033 -0.019 9
0.127 -0.08 -0.112 8
0.114 -0.072 -0.101 8
0.035 -0.116 -0.193 7
0.002 -0.201 -0.277 10
0.021 -0.333 -0.296 9
0.048 -0.435 -0.248 8
0.068 -0.492 -0.14 8
0.088 -0.53 -0.04 9
0.079 -0.477 -0.036 8
0.097 -0.475 -0.032 9
0.099 -0.416 -0.118 8
0.085 -0.317 -0.19 8
0.069 -0.201 -0.267 9
0.07 -0.103 -0.35 8
0.063 -0.092 -0.315 7
0.072 0.006 -0.345 10
0.065 0.006 -0.311 8
0.041 0.063 -0.185 9
0.051 0.118 -0.027 8
0.092 0.182 0.102 8
0.133 0.251 0.21 9
0.146 0.308 0.303 8
0.138 0.347 0.367 9
0.124 0.312 0.33 8
0.114 0.347 0.379 8
0.103 0.413 0.451 9
0.081 0.529 0.599 6
0.053 0.668 0.799 11
0.034 0.792 0.956 8
0.028 0.866 1.038 8
0.025 0.779 0.934 9
0.038 0.797 1.007 8
0.072 0.779 1.117 9
0.109 0.764 1.24 8
0.141 0.786 1.305 8
0.145 0.81 1.284 9
0.125 0.809 1.164 8
0.113 0.728 1.048 8
0.107 0.701 0.817 7
0.168 0.649 0.524 10
0.283 0.601 0.298 9
0.426 0.578 0.153 8
0.571 0.659 0.055 8
0.655 0.797 0.03 9
0.589 0.717 0.027 8
0.661 0.737 0.065 9
0.885 0.502 0.089 8
1.187 0.139 0.075 8
1.321 -0.13 0.085 9
1.296 -0.325 0.236 8
1.166 -0.292 0.212 7
1.051 -0.502 0.499 10
0.851 -0.709 0.768 8
0.576 -0.844 0.947 9
0.273 -0.881 0.983 8
0.062 -0.873 0.87 9
0.063 -0.936 0.618 8
0.206 -1.111 0.27 8
0.185 -1.0 0.243 9
0.307 -1.196 -0.075 8
0.367 -1.335 -0.285 9
0.381 -1.453 -0.376 8
0.347 -1.583 -0.376 7
0.246 -1.708 -0.335 10
0.029 -1.751 -0.312 8
0.026 -1.575 -0.281 9
-0.241 -1.506 -0.301 8
-0.515 -1.343 -0.422 8
-0.768 -1.148 -0.661 9
-0.923 -1.0 -0.904 8
-0.973 -0.938 -1.044 8
-0.931 -0.948 -1.115 9
-0.838 -0.853 -1.004 8
-0.709 -0.882 -1.066 9
-0.524 -0.906 -1.055 6
-0.326 -0.952 -0.954 10
-0.179 -0.985 -0.836 9
-0.127 -0.945 -0.768 8
-0.114 -0.85 -0.751 9
-0.082 -0.785 -0.676 8
-0.065 -0.725 -0.743 8
-0.094 -0.622 -0.868 9
-0.144 -0.479 -0.935 8
-0.187 -0.369 -0.907 9
-0.207 -0.316 -0.805 8
-0.186 -0.284 -0.724 8
-0.18 -0.256 -0.574 7
-0.118 -0.228 -0.403 10
0.004 -0.224 -0.279 9
0.128 -0.224 -0.226 8
0.196 -0.166 -0.201 8
0.198 -0.077 -0.141 9
0.178 -0.069 -0.127 8
0.14 0.044 -0.044 8
0.117 0.212 -0.011 9
0.132 0.408 -0.034 8
0.143 0.592 -0.085 9
0.144 0.726 -0.144 8
0.129 0.653 -0.13 7
0.137 0.754 -0.168 10
0.157 0.859 -0.157 8
0.18 0.992 -0.074 9
0.193 1.185 0.051 8
0.186 1.397 0.193 8
0.17 1.571 0.316 9
0.158 1.7 0.377 8
0.142 1.53 0.339 9
0.133 1.607 0.41 8
0.107 1.627 0.542 8
0.047 1.593 0.722 9
-0.044 1.515 0.913 6
-0.141 1.423 1.101 11
-0.193 1.362 1.294 8
-0.173 1.226 1.164 8
-0.222 1.163 1.341 9
-0.285 1.075 1.478 8
-0.35 1.047 1.564 8
-0.434 1.055 1.561 9
-0.486 1.036 1.467 8
-0.483 0.956 1.222 9
-0.435 0.861 1.1 8
-0.436 0.774 0.675 8
-0.476 0.707 0.205 7
-0.578 0.632 -0.221 10
-0.714 0.485 -0.55 9
-0.884 0.272 -0.673 8
-1.052 0.073 -0.549 8
-0.947 0.065 -0.494 9
-1.091 -0.148 -0.156 8
-1.251 -0.411 0.368 9
-1.359 -0.659 0.987 8
-1.301 -0.894 1.505 8
-1.061 -1.138 1.771 9
-0.738 -1.328 1.757 8
-0.664 -1.195 1.581 7
-0.31 -1.293 1.259 10
0.045 -1.309 0.686 8
0.269 -1.322 0.016 9
0.333 -1.379 -0.614 8
0.295 -1.47 -1.088 8
0.231 -1.564 -1.302 9
0.208 -1.407 -1.172 8
0.182 -1.497 -1.017 9
0.156 -1.582 -0.681 8
0.117 -1.612 -0.453 8
0.125 -1.473 -0.409 9
0.208 -1.252 -0.586 7
0.325 -1.032 -0.861 10
0.292 -0.929 -0.775 8
0.395 -0.671 -1.0 8
0.451 -0.397 -1.143 9
0.448 -0.199 -1.171 8
0.406 -0.081 -1.046 9
0.345 0.003 -0.843 8
0.292 0.087 -0.659 8
0.263 0.079 -0.593 9
0.264 0.116 -0.407 8
0.308 0.081 -0.223 9
0.331 0.037 -0.092 6
0.284 0.016 -0.103 10
0.2 0.007 -0.228 9
0.151 -0.024 -0.338 8
0.136 -0.022 -0.305 9
0.107 -0.095 -0.423 8
0.076 -0.169 -0.512 8
0.04 -0.213 -0.511 9
0.023 -0.239 -0.45 8
0.045 -0.276 -0.374 8
0.103 -0.308 -0.33 9
0.092 -0.277 -0.297 8
0.143 -0.244 -0.308 7
0.16 -0.126 -0.336 10
0.172 -0.001 -0.347 8
0.216 0.086 -0.321 9
0.273 0.163 -0.289 8
0.3 0.247 -0.272 9
0.27 0.222 -0.245 8
0.256 0.319 -0.219 8
0.229 0.396 -0.218 9
0.204 0.447 -0.228 8
0.137 0.516 -0.19 9
0.044 0.65 -0.121 8
0.039 0.585 -0.109 7
-0.043 0.796 -0.041 10
-0.098 0.994 0.04 8
-0.136 1.109 0.141 9
-0.164 1.249 0.314 8
-0.169 1.417 0.635 8
-0.126 1.502 0.995 9
-0.057 1.503 1.283 8
-0.051 1.353 1.155 9
0.03 1.315 1.363 8
0.097 1.238 1.471 8
0.129 1.145 1.552 9
0.145 1.049 1.631 6
0.139 0.954 1.648 10
0.169 0.861 1.584 9
0.152 0.775 1.426 8
0.273 0.694 1.299 9
0.378 0.623 1.087 8
0.385 0.572 0.789 8
0.34 0.532 0.374 9
0.266 0.501 -0.043 8
0.234 0.439 -0.265 9
0.211 0.395 -0.238 8
0.271 0.241 -0.117 8
0.359 -0.019 0.268 7
0.448 -0.314 0.718 10
0.557 -0.58 1.103 9
0.641 -0.842 1.306 8
0.646 -1.076 1.289 8
0.581 -0.968 1.16 9
0.55 -1.123 0.912 8
0.438 -1.194 0.415 9
0.282 -1.219 -0.2 8
0.188 -1.241 -0.663 8
0.129 -1.265 -0.856 9
0.059 -1.244 -0.89 8
0.053 -1.119 -0.801 7
-0.009 -1.062 -0.768 10
-0.043 -1.018 -0.692 8
-0.05 -0.993 -0.61 9
-0.038 -0.95 -0.589 8
-0.013 -0.885 -0.745 8
0.019 -0.805 -1.016 9
0.017 -0.725 -0.914 8
0.041 -0.637 -1.095 9
0.035 -0.513 -1.138 8
0.009 -0.332 -1.187 8
-0.023 -0.151 -1.353 9
-0.065 -0.034 -1.524 7
-0.114 0.019 -1.571 10
-0.102 0.017 -1.414 8
-0.163 0.017 -1.366 8
-0.227 -0.01 -1.254 9
-0.264 -0.065 -1.13 8
-0.278 -0.168 -0.997 9
-0.308 -0.311 -0.824 8
-0.366 -0.453 -0.62 8
-0.33 -0.408 -0.558 9
-0.418 -0.526 -0.351 8
-0.486 -0.608 -0.13 8
-0.496 -0.597 -0.063 7
-0.43 -0.485 -0.144 10
-0.349 -0.383 -0.206 9
-0.297 -0.334 -0.281 8
-0.267 -0.301 -0.253 8
-0.229 -0.272 -0.358 9
-0.228 -0.254 -0.405 8
-0.251 -0.25 -0.323 9
-0.276 -0.253 -0.13 8
-0.301 -0.213 0.072 8
-0.308 -0.083 0.15 9
-0.277 -0.074 0.135 8
-0.227 0.115 0.001 7
-0.119 0.305 -0.25 10
-0.007 0.476 -0.509 8
0.038 0.624 -0.738 9
0.008 0.769 -0.849 8
-0.049 0.897 -0.747 9
-0.044 0.807 -0.673 8
-0.084 0.894 -0.423 8
-0.067 0.977 -0.16 9
0.01 1.059 0.12 8
0.097 1.097 0.409 9
0.193 1.094 0.61 8
0.174 0.984 0.549 7
0.262 1.006 0.659 10
0.273 1.078 0.801 8
0.218 1.191 0.934 9
0.172 1.292 1.057 8
0.139 1.312 1.2 8
0.096 1.268 1.272 9
0.092 1.209 1.258 8
0.082 1.088 1.132 9
0.113 1.011 1.063 8
0.148 0.9 0.956 8
0.158 0.794 0.845 9
0.101 0.698 0.811 6
-0.032 0.606 0.815 10
-0.198 0.488 0.768 9
-0.178 0.439 0.691 8
-0.347 0.311 0.581 9
-0.531 0.223 0.44 8
-0.752 0.188 0.304 8
-0.962 0.194 0.174 9
-1.078 0.182 -0.017 8
-1.082 0.103 -0.227 9
-0.973 0.093 -0.204 8
-0.917 -0.072 -0.272 8
-0.835 -0.302 -0.142 7
-0.738 -0.556 0.109 10
-0.62 -0.85 0.418 9
-0.496 -1.132 0.827 8
-0.356 -1.338 1.213 8
-0.32 -1.204 1.091 9
-0.189 -1.307 1.31 8
-0.107 -1.268 1.297 8
-0.064 -1.126 1.117 9
-0.066 -0.964 0.855 8
-0.064 -0.835 0.556 9
-0.029 -0.75 0.368 8
-0.026 -0.675 0.331 7
0.007 -0.655 0.323 10
0.047 -0.707 0.41 8
0.082 -0.791 0.506 9
0.109 -0.86 0.521 8
0.157 -0.873 0.368 8
0.227 -0.79 -0.025 9
0.205 -0.711 -0.022 8
0.282 -0.562 -0.571 9
0.343 -0.37 -1.078 8
0.373 -0.166 -1.381 8
0.376 0.0 -1.448 9
0.354 0.132 -1.402 6
0.313 0.228 -1.302 11
0.281 0.206 -1.172 8
0.255 0.213 -1.064 8
0.254 0.15 -0.953 9
0.263 0.067 -0.854 8
0.249 -0.028 -0.773 9
0.189 -0.126 -0.703 8
0.086 -0.199 -0.637 8
0.077 -0.179 -0.573 9
-0.05 -0.237 -0.52 8
-0.149 -0.29 -0.478 8
-0.175 -0.321 -0.441 7
-0.144 -0.331 -0.412 10
-0.097 -0.359 -0.378 9
-0.038 -0.408 -0.33 8
-0.034 -0.367 -0.297 8
0.038 -0.422 -0.254 9
0.106 -0.501 -0.216 8
0.153 -0.593 -0.184 9
0.172 -0.645 -0.141 8
0.162 -0.649 -0.081 8
0.133 -0.619 -0.01 9
0.12 -0.557 -0.009 8
0.087 -0.513 0.001 7
0.053 -0.434 -0.053 10
0.024 -0.275 -0.095 8
0.011 -0.011 -0.13 9
0.012 0.274 -0.203 8
0.016 0.478 -0.281 9
0.014 0.43 -0.252 8
0.021 0.547 -0.227 8
-0.007 0.578 -0.113 9
-0.089 0.583 0.066 8
-0.179 0.593 0.338 8
-0.269 0.626 0.561 9
-0.242 0.563 0.504 7
-0.303 0.604 0.62 10
-0.277 0.632 0.604 8
-0.154 0.692 0.343 8
0.0 0.733 0.011 9
0.115 0.716 -0.192 8
0.165 0.705 -0.271 9
0.164 0.712 -0.266 8
0.147 0.641 -0.24 8
0.129 0.628 -0.212 9
0.123 0.552 -0.186 8
0.093 0.443 -0.166 9
-0.008 0.425 -0.159 6
-0.159 0.498 -0.18 10
-0.272 0.525 -0.243 9
-0.245 0.472 -0.218 8
-0.245 0.382 -0.293 9
-0.123 0.191 -0.345 8
0.045 -0.007 -0.388 8
0.21 -0.154 -0.432 9
0.358 -0.241 -0.464 8
0.451 -0.269 -0.425 9
0.406 -0.242 -0.383 8
0.398 -0.22 -0.288 8
0.292 -0.137 -0.202 7
0.164 -0.005 -0.134 10
0.064 0.144 -0.093 8
0.015 0.246 -0.084 9
0.019 0.247 -0.074 8
0.017 0.223 -0.067 9
0.051 0.166 -0.033 8
0.08 0.086 0.01 8
0.1 0.005 0.056 9
0.104 -0.042 0.122 8
0.083 -0.046 0.179 9
0.045 -0.039 0.204 8
0.041 -0.035 0.183 7
0.025 -0.039 0.185 10
0.026 -0.038 0.174 8
0.012 -0.005 0.155 9
-0.01 0.048 0.139 8
-0.03 0.11 0.14 8
-0.035 0.178 0.135 9
-0.031 0.16 0.121 8
-0.025 0.241 0.099 9
-0.019 0.317 0.08 8
-0.007 0.322 0.069 8
0.024 0.269 0.062 9
0.073 0.197 0.053 6
0.098 0.115 0.047 11
0.088 0.103 0.042 8
0.078 0.022 0.04 8
0.058 -0.071 0.039 9
0.032 -0.147 0.039 8
-0.006 -0.176 0.041 8
-0.033 -0.194 0.039 9
-0.033 -0.214 0.034 8
-0.03 -0.192 0.03 9
-0.012 -0.198 0.013 8
0.008 -0.184 -0.014 8
0.024 -0.142 -0.064 7
0.035 -0.133 -0.078 10
0.019 -0.137 -0.037 9
-0.014 -0.104 -0.001 8
-0.012 -0.093 -0.001 8
-0.04 -0.035 0.025 9
-0.049 0.022 0.04 8
-0.027 0.041 0.056 9
0.01 0.045 0.079 8
0.051 0.049 0.084 8
0.071 0.022 0.086 9
0.064 0.02 0.077 8
0.047 -0.03 0.118 7
0.014 -0.046 0.135 10
0.004 -0.049 0.086 8
0.023 -0.069 0.029 9
0.022 -0.057 -0.027 8
0.015 -0.023 -0.061 8
0.013 -0.02 -0.055 9
-0.011 0.04 -0.05 8
-0.061 0.17 -0.039 9
-0.067 0.266 -0.003 8
-0.04 0.261 0.104 8
-0.012 0.249 0.264 9
-0.011 0.224 0.237 7
0.013 0.262 0.36 10
0.046 0.305 0.408 8
0.09 0.315 0.361 8
0.129 0.271 0.198 9
0.17 0.195 0.003 8
0.181 0.096 -0.147 9
0.131 -0.019 -0.25 8
0.118 -0.017 -0.225 8
0.041 -0.121 -0.269 9
-0.035 -0.153 -0.27 8
# end
#Thu Feb 26 20:23:05 GMT+08:00 20158
