# Supplementary material for: Abnormal Gait Behavior Detection for Elderly Based on Enhanced Wigner-Ville Analysis and Cloud Incremental SVM Learning
Source: Hindawi journal article supplement (doi:10.1155/2016/5869238), 2016-01-01
Supplement: f1 [file 5869238.f1.zip › Supplementary Materials/Original Data/Climbing three steps/original__37.txt]

# Accelerometer Values
# filename:  original__37.txt
# Saving start time: Thu Feb 26 20:23:09 GMT+08:00 2015

# sensor resolution: 0.0095825195m/s^2
#Sensorvendor: KIONIX, name: KX023 Accelerometer, type: 1,version : 1, range 39.240005

# X value, Y value, Z value, time diff in ms
-0.065 0.038 -0.161 9
-0.082 0.037 -0.127 8
-0.083 0.036 -0.064 9
-0.066 0.033 -0.028 8
-0.06 0.025 -0.032 8
-0.054 0.022 -0.029 9
0.021 0.002 -0.032 8
0.065 -0.027 -0.025 8
0.06 -0.032 0.001 9
0.009 -0.009 0.054 8
0.008 -0.008 0.048 7
-0.042 0.016 0.049 10
-0.066 0.014 0.044 8
-0.062 0.016 -0.039 9
-0.065 0.008 -0.127 8
-0.084 0.016 -0.182 9
-0.102 0.029 -0.225 8
-0.1 0.038 -0.266 8
-0.09 0.034 -0.239 9
-0.073 0.044 -0.288 8
-0.056 0.053 -0.341 9
-0.048 0.055 -0.356 8
-0.041 0.049 -0.31 7
-0.038 0.036 -0.185 10
-0.04 0.022 0.0 8
-0.036 0.02 0.0 9
-0.044 0.002 0.188 8
-0.058 -0.004 0.315 8
-0.075 -0.007 0.34 9
-0.087 -0.006 0.24 8
-0.095 0.002 0.07 8
-0.101 0.011 -0.067 9
-0.09 0.01 -0.06 8
-0.093 0.011 -0.1 9
-0.094 0.008 -0.023 6
-0.093 0.006 0.122 10
-0.088 0.002 0.249 9
-0.079 0.002 0.314 8
-0.081 0.007 0.295 9
-0.073 0.006 0.266 8
-0.093 0.012 0.154 8
-0.115 0.024 -0.027 9
-0.122 0.039 -0.177 8
-0.126 0.04 -0.237 9
-0.14 0.027 -0.268 8
-0.161 0.014 -0.308 8
-0.144 0.012 -0.277 7
-0.167 0.018 -0.333 10
-0.168 0.027 -0.391 9
-0.151 0.022 -0.42 8
-0.142 0.018 -0.43 8
-0.123 0.036 -0.417 9
-0.065 0.06 -0.319 8
-0.059 0.054 -0.287 9
0.019 0.086 -0.07 8
0.1 0.133 0.146 8
0.182 0.181 0.229 9
0.249 0.197 0.188 8
0.288 0.169 0.061 7
0.293 0.135 -0.063 10
0.264 0.121 -0.057 8
0.244 0.094 -0.134 9
0.203 0.06 -0.185 8
0.144 0.019 -0.207 8
0.093 -0.023 -0.203 9
0.056 -0.071 -0.2 8
0.034 -0.11 -0.233 9
0.03 -0.099 -0.209 8
0.033 -0.134 -0.312 8
0.03 -0.179 -0.491 9
-0.002 -0.2 -0.684 7
-0.048 -0.195 -0.823 10
-0.086 -0.191 -0.82 8
-0.121 -0.216 -0.641 8
-0.109 -0.194 -0.577 9
-0.151 -0.224 -0.295 8
-0.199 -0.208 -0.006 9
-0.223 -0.183 0.197 8
-0.204 -0.153 0.3 8
-0.158 -0.105 0.345 9
-0.106 -0.035 0.352 8
-0.096 -0.032 0.317 8
-0.055 0.07 0.284 7
-0.034 0.191 0.222 10
-0.02 0.311 0.183 9
-0.017 0.408 0.225 8
-0.055 0.471 0.374 8
-0.113 0.515 0.589 9
-0.102 0.463 0.53 8
-0.13 0.505 0.768 9
-0.124 0.544 1.039 8
-0.077 0.586 1.281 8
0.015 0.635 1.339 9
0.134 0.732 1.158 8
0.121 0.658 1.042 7
0.251 0.775 0.76 10
0.363 0.833 0.52 8
0.406 0.864 0.39 9
0.375 0.866 0.395 8
0.318 0.801 0.524 9
0.237 0.735 0.691 8
0.139 0.742 0.738 8
0.125 0.668 0.664 9
0.076 0.721 0.512 8
0.087 0.756 0.278 9
0.142 0.734 0.048 8
0.284 0.6 -0.138 7
0.512 0.332 -0.226 10
0.673 0.029 -0.207 8
0.606 0.026 -0.187 8
0.631 -0.203 0.019 9
0.543 -0.347 0.379 8
0.402 -0.492 0.787 9
0.291 -0.701 1.128 8
0.251 -0.891 1.269 8
0.279 -0.976 1.184 9
0.251 -0.878 1.065 8
0.335 -0.897 0.794 9
0.404 -0.902 0.48 6
0.388 -0.872 0.216 10
0.302 -0.783 -0.008 9
0.157 -0.71 -0.123 8
0.015 -0.732 -0.092 9
0.014 -0.658 -0.083 8
-0.053 -0.807 0.014 8
-0.064 -1.009 0.089 9
-0.053 -1.171 0.108 8
-0.051 -1.283 0.047 9
-0.074 -1.363 -0.145 8
-0.129 -1.383 -0.441 8
-0.116 -1.245 -0.397 7
-0.206 -1.195 -0.644 10
-0.286 -1.082 -0.805 9
-0.323 -0.958 -0.968 8
-0.306 -0.872 -1.137 8
-0.215 -0.838 -1.248 9
-0.093 -0.868 -1.272 8
-0.084 -0.781 -1.145 8
0.018 -0.898 -1.118 9
0.094 -1.009 -1.038 8
0.117 -1.043 -0.939 9
0.082 -1.056 -0.842 8
0.011 -1.044 -0.751 7
-0.089 -0.958 -0.682 10
-0.08 -0.862 -0.614 8
-0.163 -0.728 -0.625 9
-0.174 -0.599 -0.737 8
-0.099 -0.524 -0.861 8
0.022 -0.496 -0.888 9
0.134 -0.5 -0.754 8
0.178 -0.473 -0.491 9
0.161 -0.426 -0.442 8
0.133 -0.351 -0.179 8
0.082 -0.272 0.017 9
0.037 -0.175 0.109 6
0.007 0.041 0.091 11
0.01 0.39 0.024 8
0.089 0.736 -0.04 8
0.08 0.662 -0.036 9
0.225 0.977 -0.075 8
0.346 1.285 -0.036 9
0.392 1.499 0.13 8
0.335 1.633 0.388 8
0.184 1.78 0.612 9
0.025 1.89 0.85 8
0.023 1.701 0.765 8
-0.093 1.727 1.091 7
-0.157 1.697 1.32 10
-0.176 1.717 1.371 9
-0.161 1.783 1.315 8
-0.145 1.842 1.192 8
-0.188 1.861 1.048 9
-0.169 1.675 0.943 8
-0.261 1.638 0.856 9
-0.349 1.543 0.802 8
-0.413 1.416 0.738 8
-0.456 1.235 0.67 9
-0.511 0.99 0.572 8
-0.46 0.891 0.515 7
-0.546 0.614 0.38 10
-0.606 0.32 0.275 8
-0.633 0.062 0.235 9
-0.657 -0.092 0.248 8
-0.702 -0.164 0.294 8
-0.747 -0.205 0.466 9
-0.763 -0.281 0.829 8
-0.686 -0.253 0.746 9
-0.677 -0.406 1.126 8
-0.638 -0.62 1.414 8
-0.58 -0.874 1.555 9
-0.512 -1.138 1.451 7
-0.466 -1.335 1.137 10
-0.448 -1.41 0.642 8
-0.403 -1.269 0.578 8
-0.393 -1.274 -0.024 9
-0.364 -1.263 -0.568 8
-0.313 -1.273 -0.883 9
-0.256 -1.265 -0.928 8
-0.162 -1.236 -0.81 8
0.031 -1.228 -0.591 9
0.028 -1.106 -0.532 8
0.267 -1.121 -0.334 9
0.437 -1.07 -0.244 6
0.511 -0.918 -0.317 10
0.507 -0.719 -0.552 9
0.464 -0.522 -0.792 8
0.417 -0.352 -0.938 9
0.376 -0.316 -0.844 8
0.353 -0.187 -0.961 8
0.336 -0.104 -1.033 9
0.32 -0.056 -1.017 8
0.284 -0.028 -1.011 9
0.185 -0.002 -1.077 8
0.036 0.0 -1.162 8
0.032 0.0 -1.046 7
-0.13 -0.015 -1.083 10
-0.315 -0.036 -0.98 8
-0.463 -0.094 -0.708 9
-0.53 -0.179 -0.362 8
-0.533 -0.269 -0.086 9
-0.484 -0.367 0.12 8
-0.435 -0.33 0.108 8
-0.298 -0.421 0.244 9
-0.09 -0.465 0.234 8
0.088 -0.474 0.151 9
0.219 -0.465 0.072 8
0.197 -0.418 0.065 7
0.41 -0.524 -0.024 10
0.369 -0.472 -0.021 8
0.415 -0.478 0.008 9
0.441 -0.434 0.031 8
0.475 -0.34 -0.013 8
0.497 -0.213 -0.228 9
0.492 -0.076 -0.486 8
0.452 0.035 -0.619 9
0.407 0.031 -0.557 8
0.34 0.119 -0.583 8
0.27 0.198 -0.532 9
0.204 0.285 -0.452 6
0.145 0.366 -0.419 10
0.093 0.422 -0.439 9
0.044 0.484 -0.466 8
0.04 0.435 -0.419 9
-0.014 0.534 -0.437 8
-0.063 0.644 -0.399 8
-0.094 0.735 -0.318 9
-0.098 0.776 -0.24 8
-0.085 0.784 -0.116 9
-0.066 0.796 0.073 8
-0.059 0.716 0.065 8
-0.025 0.745 0.274 7
-0.024 0.772 0.448 10
-0.08 0.83 0.533 9
-0.135 0.923 0.546 8
-0.149 0.988 0.499 8
-0.134 0.889 0.352 9
-0.109 0.8 0.317 8
-0.043 0.988 0.117 9
0.051 0.93 -0.017 8
0.124 0.849 -0.035 8
0.155 0.813 0.083 9
0.17 0.801 0.264 8
0.153 0.721 0.237 7
0.175 0.707 0.401 10
0.209 0.679 0.483 8
0.244 0.648 0.443 9
0.27 0.651 0.342 8
0.272 0.68 0.247 8
0.263 0.699 0.188 9
0.237 0.629 0.169 8
0.243 0.65 0.161 9
0.225 0.669 0.302 8
0.182 0.695 0.568 8
0.185 0.709 0.786 9
0.247 0.686 0.89 7
0.362 0.624 0.948 10
0.326 0.561 0.853 8
0.485 0.452 1.004 8
0.624 0.27 1.199 9
0.759 0.048 1.285 8
0.949 -0.145 1.144 9
1.143 -0.343 0.796 8
1.253 -0.535 0.401 8
1.127 -0.481 0.361 9
1.158 -0.653 0.085 8
1.098 -0.823 0.037 9
0.922 -0.978 0.239 6
0.581 -1.054 0.505 10
0.174 -1.047 0.632 9
-0.125 -1.067 0.606 8
-0.112 -0.96 0.545 8
-0.245 -1.038 0.366 9
-0.237 -1.105 0.102 8
-0.187 -1.123 -0.197 9
-0.139 -1.101 -0.531 8
-0.104 -1.058 -0.788 8
-0.074 -1.011 -0.884 9
-0.067 -0.91 -0.795 8
-0.033 -0.892 -0.734 7
-0.001 -0.865 -0.592 10
0.014 -0.78 -0.496 8
0.006 -0.673 -0.49 9
-0.011 -0.592 -0.498 8
-0.031 -0.508 -0.479 9
-0.028 -0.457 -0.431 8
-0.072 -0.371 -0.424 8
-0.155 -0.296 -0.432 9
-0.289 -0.224 -0.443 8
-0.419 -0.145 -0.488 9
-0.498 -0.045 -0.611 8
-0.449 -0.04 -0.549 7
-0.454 0.059 -0.741 10
-0.373 0.111 -0.879 8
-0.264 0.093 -0.846 9
-0.222 0.07 -0.714 8
-0.243 0.019 -0.547 8
-0.247 -0.082 -0.341 9
-0.249 -0.179 -0.184 8
-0.224 -0.161 -0.166 8
-0.249 -0.284 -0.088 9
-0.268 -0.427 -0.043 8
-0.277 -0.553 -0.018 9
-0.281 -0.633 -0.062 6
-0.26 -0.675 -0.181 10
-0.201 -0.629 -0.347 9
-0.181 -0.566 -0.312 8
-0.122 -0.465 -0.453 9
-0.084 -0.402 -0.508 8
-0.036 -0.396 -0.487 8
0.046 -0.481 -0.349 9
0.116 -0.592 -0.118 8
0.072 -0.539 0.073 9
0.065 -0.485 0.065 8
-0.096 -0.246 0.129 8
-0.256 0.038 0.063 7
-0.356 0.277 -0.036 10
-0.402 0.454 -0.072 9
-0.373 0.611 -0.016 8
-0.275 0.728 0.012 8
-0.247 0.655 0.011 9
-0.12 0.698 -0.115 8
0.031 0.683 -0.284 8
0.196 0.644 -0.373 9
0.313 0.611 -0.395 8
0.351 0.595 -0.345 9
0.335 0.602 -0.222 8
0.302 0.542 -0.2 7
0.279 0.576 -0.064 10
0.274 0.6 0.055 8
0.245 0.591 0.155 9
0.195 0.553 0.208 8
0.186 0.486 0.217 8
0.219 0.385 0.203 9
0.197 0.346 0.183 8
0.231 0.264 0.146 9
0.261 0.238 0.02 8
0.283 0.196 -0.112 8
0.278 0.141 -0.192 9
0.185 0.174 -0.267 6
-0.001 0.291 -0.295 11
-0.001 0.261 -0.265 8
-0.2 0.358 -0.243 8
-0.33 0.383 -0.146 9
-0.332 0.354 0.027 8
-0.236 0.281 0.245 9
-0.117 0.201 0.43 8
-0.011 0.157 0.519 8
-0.01 0.141 0.467 9
0.038 0.12 0.483 8
0.01 0.119 0.456 8
-0.069 0.133 0.421 7
-0.182 0.135 0.382 10
-0.291 0.131 0.329 9
-0.349 0.12 0.219 8
-0.314 0.108 0.197 8
-0.308 0.057 0.029 9
-0.275 -0.036 -0.134 8
-0.262 -0.084 -0.225 9
-0.281 -0.044 -0.209 8
-0.302 0.013 -0.138 8
-0.293 0.033 -0.09 9
-0.264 0.03 -0.081 8
-0.218 0.02 -0.097 7
-0.136 0.004 -0.142 10
-0.046 -0.045 -0.147 8
0.018 -0.112 -0.123 9
0.032 -0.169 -0.114 8
0.005 -0.212 -0.109 9
0.005 -0.191 -0.098 8
-0.038 -0.227 -0.079 8
-0.075 -0.245 -0.066 9
-0.112 -0.185 -0.078 8
-0.161 -0.05 -0.064 9
-0.184 0.085 0.024 8
-0.166 0.077 0.021 7
-0.157 0.161 0.147 10
-0.122 0.183 0.251 8
-0.052 0.173 0.3 8
0.028 0.142 0.308 9
0.079 0.123 0.288 8
0.085 0.112 0.249 9
0.06 0.105 0.208 8
0.054 0.095 0.187 8
0.027 0.079 0.156 9
0.016 0.028 0.131 8
0.039 -0.02 0.14 9
0.041 -0.034 0.163 6
-0.014 -0.009 0.173 10
-0.074 0.047 0.172 9
-0.067 0.042 0.154 8
-0.094 0.076 0.145 9
-0.088 0.062 0.118 8
-0.065 0.014 0.049 8
-0.048 -0.022 -0.041 9
-0.047 -0.028 -0.128 8
-0.063 -0.031 -0.204 9
-0.057 -0.028 -0.184 8
-0.083 -0.003 -0.236 8
-0.107 0.042 -0.241 7
-0.126 0.084 -0.211 10
-0.125 0.104 -0.164 8
-0.086 0.088 -0.11 9
-0.039 0.063 -0.075 8
-0.035 0.057 -0.068 9
-0.01 0.05 -0.049 8
-0.012 0.065 -0.037 8
-0.024 0.086 -0.043 9
-0.03 0.098 -0.072 8
-0.023 0.088 -0.082 9
-0.014 0.062 -0.056 8
-0.012 0.055 -0.051 7
-0.026 0.046 0.013 10
-0.059 0.052 0.094 8
-0.085 0.057 0.153 9
-0.091 0.055 0.18 8
-0.069 0.045 0.17 8
-0.035 0.024 0.14 9
-0.031 0.022 0.126 8
-0.009 0.002 0.084 9
-0.006 0.0 0.034 8
-0.004 0.003 0.0 8
0.009 -0.002 -0.012 9
0.008 -0.001 -0.011 6
0.077 0.007 0.01 11
0.069 0.007 0.009 8
0.099 0.005 0.0 8
0.104 -0.013 -0.006 9
0.088 -0.031 0.0 8
0.064 -0.062 0.014 8
0.017 -0.063 0.077 9
-0.061 -0.013 0.144 8
-0.055 -0.012 0.129 9
-0.109 0.024 0.153 8
-0.098 0.033 0.145 8
-0.059 0.04 0.104 7
-0.016 0.053 0.044 10
0.018 0.051 0.015 9
0.016 0.046 0.013 8
0.027 0.031 0.012 8
0.036 0.021 0.075 9
0.054 -0.005 0.065 8
0.065 -0.06 0.008 9
0.056 -0.096 -0.088 8
# end
#Thu Feb 26 20:23:13 GMT+08:00 20151
