# Supplementary material for: Abnormal Gait Behavior Detection for Elderly Based on Enhanced Wigner-Ville Analysis and Cloud Incremental SVM Learning
Source: Hindawi journal article supplement (doi:10.1155/2016/5869238), 2016-01-01
Supplement: f1 [file 5869238.f1.zip › Supplementary Materials/Original Data/Climbing three steps/original__38.txt]

# Accelerometer Values
# filename:  original__38.txt
# Saving start time: Thu Feb 26 20:23:15 GMT+08:00 2015

# sensor resolution: 0.0095825195m/s^2
#Sensorvendor: KIONIX, name: KX023 Accelerometer, type: 1,version : 1, range 39.240005

# X value, Y value, Z value, time diff in ms
-0.129 0.089 -0.469 8
-0.158 0.12 -0.399 9
-0.118 0.11 -0.291 7
-0.034 0.062 -0.169 10
0.048 0.0 -0.022 8
0.095 -0.056 0.138 8
0.101 -0.108 0.262 9
0.091 -0.097 0.236 8
0.068 -0.136 0.286 9
0.037 -0.154 0.263 8
0.012 -0.151 0.171 8
-0.004 -0.118 0.014 9
-0.017 -0.06 -0.168 8
-0.024 -0.009 -0.319 9
-0.022 -0.008 -0.287 6
-0.02 0.018 -0.378 10
-0.027 0.041 -0.412 9
-0.027 0.05 -0.398 8
-0.018 0.038 -0.33 9
-0.007 0.023 -0.214 8
0.009 0.002 -0.09 8
0.008 0.001 -0.081 9
0.032 -0.051 0.013 8
0.053 -0.115 0.077 8
0.053 -0.132 0.135 9
0.028 -0.08 0.188 8
0.025 -0.072 0.169 7
0.013 0.04 0.177 10
0.012 0.036 0.159 8
0.033 0.044 0.146 9
0.036 0.035 0.182 8
0.001 0.044 0.243 9
-0.057 0.069 0.271 8
-0.098 0.095 0.247 8
-0.091 0.106 0.191 9
-0.082 0.095 0.172 8
-0.043 0.087 0.089 9
0.0 0.074 0.0 8
0.033 0.062 -0.037 7
0.058 0.043 -0.011 10
0.07 0.007 0.046 8
0.063 -0.031 0.084 9
0.057 -0.028 0.075 8
0.065 -0.054 0.085 8
0.038 -0.052 0.07 9
-0.006 -0.025 0.017 8
-0.044 0.003 -0.059 9
-0.052 0.026 -0.129 8
-0.047 0.024 -0.116 8
-0.039 0.039 -0.168 9
-0.023 0.036 -0.168 6
0.002 0.01 -0.126 11
0.024 -0.022 -0.065 8
0.025 -0.043 -0.001 8
0.006 -0.06 0.029 9
0.006 -0.054 0.026 8
-0.034 -0.06 0.032 8
-0.093 -0.039 0.033 9
-0.161 -0.007 0.046 8
-0.203 0.014 0.076 9
-0.201 0.021 0.082 8
-0.161 0.023 0.041 8
-0.144 0.021 0.037 7
-0.104 -0.013 -0.05 10
-0.095 -0.062 -0.165 9
-0.124 -0.074 -0.242 8
-0.19 -0.072 -0.261 8
-0.258 -0.058 -0.211 9
-0.32 -0.028 -0.111 8
-0.288 -0.025 -0.1 9
-0.356 0.008 0.004 8
-0.405 0.033 0.109 8
-0.419 0.036 0.181 9
-0.394 0.033 0.181 8
-0.371 0.04 0.105 7
-0.376 0.056 -0.01 10
-0.338 0.051 -0.009 8
-0.334 0.076 -0.132 9
-0.311 0.109 -0.248 8
-0.268 0.137 -0.334 8
-0.181 0.134 -0.397 9
-0.09 0.112 -0.433 8
-0.041 0.078 -0.43 9
-0.037 0.07 -0.387 8
0.001 0.018 -0.331 8
0.05 -0.027 -0.198 9
0.099 -0.04 -0.027 7
0.164 -0.036 0.121 10
0.263 -0.037 0.242 8
0.349 -0.029 0.342 8
0.314 -0.026 0.308 9
0.35 0.005 0.347 8
0.343 0.034 0.281 9
0.313 0.036 0.145 8
0.254 0.03 0.009 8
0.179 0.03 -0.088 9
0.13 0.022 -0.126 8
0.117 0.02 -0.114 9
0.099 0.003 -0.127 6
0.103 -0.021 -0.125 10
0.11 -0.066 -0.073 9
0.111 -0.12 -0.02 8
0.141 -0.182 -0.026 9
0.204 -0.286 -0.076 8
0.184 -0.258 -0.068 8
0.242 -0.373 -0.108 9
0.254 -0.409 -0.14 8
0.231 -0.366 -0.184 8
0.205 -0.317 -0.213 9
0.173 -0.302 -0.213 8
0.156 -0.271 -0.192 7
0.113 -0.258 -0.15 10
0.062 -0.212 -0.064 8
0.0 -0.125 0.018 9
-0.048 -0.001 0.064 8
-0.056 0.123 0.071 9
-0.023 0.219 0.062 8
0.036 0.276 0.089 8
0.033 0.248 0.08 9
0.086 0.279 0.168 8
0.113 0.288 0.305 9
0.112 0.325 0.431 8
0.093 0.407 0.489 7
0.071 0.501 0.498 10
0.073 0.608 0.536 8
0.066 0.547 0.482 9
0.098 0.643 0.607 8
0.148 0.704 0.682 8
0.217 0.742 0.61 9
0.296 0.79 0.486 8
0.402 0.829 0.384 8
0.518 0.856 0.396 9
0.466 0.77 0.356 8
0.489 0.862 0.504 9
0.372 0.981 0.714 6
0.196 1.046 0.954 10
0.009 1.064 1.226 9
-0.161 1.071 1.467 8
-0.294 1.147 1.471 9
-0.264 1.033 1.324 8
-0.305 1.183 1.004 8
-0.239 1.278 0.428 9
-0.031 1.248 -0.197 8
0.342 1.016 -0.722 9
0.785 0.648 -1.006 8
1.108 0.267 -0.884 8
0.997 0.24 -0.795 7
1.11 -0.153 -0.275 10
1.097 -0.507 0.531 9
1.022 -0.858 1.409 8
0.897 -1.221 2.088 8
0.692 -1.522 2.387 9
0.412 -1.715 2.251 8
0.37 -1.544 2.025 8
0.13 -1.608 1.463 9
-0.008 -1.599 0.58 8
-0.065 -1.582 -0.36 9
-0.103 -1.529 -1.029 8
-0.165 -1.449 -1.346 7
-0.225 -1.392 -1.439 10
-0.202 -1.253 -1.295 8
-0.251 -1.247 -1.24 9
-0.3 -1.239 -1.106 8
-0.361 -1.172 -0.983 8
-0.459 -1.057 -0.894 9
-0.568 -0.911 -0.863 8
-0.612 -0.774 -0.87 9
-0.551 -0.696 -0.783 8
-0.529 -0.674 -0.803 8
-0.458 -0.707 -0.873 9
-0.343 -0.708 -0.961 6
-0.204 -0.767 -0.974 11
-0.073 -0.889 -0.967 8
0.037 -0.973 -0.95 8
0.033 -0.875 -0.855 9
0.113 -0.924 -0.797 8
0.132 -0.938 -0.652 9
0.07 -0.905 -0.398 8
-0.037 -0.854 -0.101 8
-0.135 -0.82 0.115 9
-0.161 -0.828 0.211 8
-0.145 -0.745 0.19 9
-0.11 -0.736 0.186 6
-0.081 -0.66 0.064 10
-0.091 -0.563 -0.19 9
-0.144 -0.454 -0.521 8
-0.213 -0.343 -0.879 8
-0.255 -0.233 -1.192 9
-0.229 -0.21 -1.072 8
-0.245 -0.086 -1.218 9
-0.243 0.079 -1.205 8
-0.236 0.295 -1.109 8
-0.208 0.498 -0.906 9
-0.127 0.637 -0.636 8
-0.114 0.574 -0.573 7
0.021 0.693 -0.361 10
0.187 0.829 -0.211 8
0.349 0.996 -0.056 9
0.45 1.155 0.111 8
0.455 1.274 0.328 9
0.389 1.343 0.605 8
0.278 1.403 0.824 8
0.25 1.262 0.742 9
0.188 1.345 0.848 8
0.178 1.431 0.865 9
0.132 1.494 0.836 8
0.08 1.537 0.776 7
0.069 1.607 0.701 10
0.076 1.694 0.63 8
0.068 1.524 0.567 9
0.093 1.586 0.515 8
0.105 1.544 0.534 8
0.035 1.424 0.637 9
-0.09 1.289 0.72 8
-0.242 1.116 0.771 8
-0.218 1.004 0.868 9
-0.367 0.904 0.781 8
-0.485 0.577 0.79 9
-0.619 0.451 0.57 6
-0.783 0.366 0.259 10
-0.966 0.239 0.022 9
-1.127 0.092 -0.105 8
-1.014 0.083 -0.094 9
-1.212 0.002 -0.147 8
-1.381 0.028 -0.154 8
-1.363 0.034 -0.098 9
-1.166 -0.042 0.127 8
-0.877 -0.124 0.534 9
-0.63 -0.269 1.052 8
-0.567 -0.242 0.947 8
-0.404 -0.471 1.429 7
-0.243 -0.743 1.727 10
-0.078 -1.082 1.771 8
0.055 -1.387 1.531 9
0.125 -1.541 1.075 8
0.08 -1.6 0.524 9
0.072 -1.44 0.471 8
-0.056 -1.456 -0.066 8
-0.164 -1.419 -0.508 9
-0.191 -1.347 -0.759 8
-0.102 -1.219 -0.867 9
0.091 -1.041 -0.893 8
0.082 -0.937 -0.804 7
0.293 -0.77 -0.784 10
0.451 -0.627 -0.738 8
0.539 -0.514 -0.685 9
0.593 -0.445 -0.68 8
0.624 -0.405 -0.823 8
0.605 -0.368 -1.073 9
0.527 -0.324 -1.36 8
0.474 -0.292 -1.224 9
0.361 -0.257 -1.554 8
0.218 -0.267 -1.772 8
0.071 -0.345 -1.802 9
-0.054 -0.458 -1.703 6
-0.144 -0.572 -1.417 11
-0.196 -0.697 -0.925 8
-0.176 -0.628 -0.832 8
-0.193 -0.776 -0.335 9
-0.181 -0.883 0.094 8
-0.136 -0.949 0.426 9
-0.028 -1.024 0.586 8
0.124 -1.059 0.51 8
0.262 -1.031 0.224 9
0.236 -0.928 0.201 8
0.334 -0.855 -0.142 8
0.375 -0.686 -0.482 7
0.358 -0.473 -0.784 10
0.289 -0.265 -0.964 9
0.172 0.023 -0.931 8
-0.002 0.371 -0.703 8
-0.002 0.334 -0.633 9
-0.201 0.616 -0.307 8
-0.342 0.822 -0.004 9
-0.387 1.0 0.209 8
-0.331 1.171 0.376 8
-0.23 1.311 0.472 9
-0.17 1.399 0.489 8
-0.153 1.259 0.44 7
-0.198 1.383 0.441 10
-0.313 1.525 0.488 8
-0.396 1.608 0.602 9
-0.429 1.613 0.748 8
-0.442 1.569 0.991 8
-0.437 1.523 1.334 9
-0.393 1.371 1.2 8
-0.372 1.351 1.563 9
-0.307 1.321 1.826 8
-0.146 1.255 1.9 8
0.08 1.15 1.764 9
0.3 1.036 1.375 7
0.472 0.943 0.834 10
0.425 0.849 0.751 8
0.511 0.78 0.254 8
0.499 0.724 -0.07 9
0.418 0.652 -0.129 8
0.313 0.536 0.032 9
0.245 0.387 0.247 8
0.27 0.233 0.379 8
0.243 0.209 0.341 9
0.363 0.087 0.38 8
0.568 -0.049 0.354 9
0.811 -0.216 0.301 6
1.009 -0.424 0.26 10
1.158 -0.634 0.248 9
1.25 -0.784 0.315 8
1.125 -0.705 0.284 9
1.085 -0.853 0.547 8
0.892 -0.992 0.889 8
0.673 -1.06 1.082 9
0.504 -1.06 1.102 8
0.386 -1.059 0.975 9
0.334 -1.067 0.699 8
0.3 -0.96 0.629 8
0.304 -0.956 0.235 7
0.393 -0.936 -0.178 10
0.573 -0.93 -0.525 8
0.742 -0.958 -0.734 9
0.823 -0.996 -0.779 8
0.797 -0.994 -0.737 9
0.717 -0.895 -0.664 8
0.591 -0.84 -0.63 8
0.365 -0.725 -0.68 9
0.1 -0.554 -0.773 8
-0.096 -0.381 -0.818 9
-0.22 -0.249 -0.844 8
-0.198 -0.224 -0.759 7
-0.323 -0.134 -0.802 10
-0.467 -0.072 -0.798 8
-0.578 0.0 -0.797 9
-0.607 0.084 -0.853 8
-0.536 0.122 -0.861 8
-0.43 0.096 -0.766 9
-0.368 0.057 -0.611 8
-0.331 0.051 -0.55 9
-0.303 0.015 -0.366 8
-0.3 -0.022 -0.198 8
-0.333 -0.054 -0.085 9
-0.372 -0.074 -0.002 6
-0.345 -0.099 0.132 11
-0.265 -0.17 0.301 8
-0.238 -0.153 0.271 8
-0.19 -0.232 0.345 9
-0.208 -0.215 0.237 8
-0.254 -0.13 0.046 8
-0.246 -0.065 -0.146 9
-0.179 -0.044 -0.357 8
-0.099 -0.064 -0.537 9
-0.089 -0.058 -0.484 8
-0.025 -0.119 -0.588 8
-0.005 -0.171 -0.579 7
-0.047 -0.199 -0.529 10
-0.073 -0.204 -0.468 9
-0.053 -0.186 -0.359 8
-0.036 -0.149 -0.24 8
-0.032 -0.134 -0.216 9
-0.022 -0.07 -0.135 8
-0.01 -0.023 -0.162 9
-0.003 0.018 -0.313 8
0.058 0.054 -0.468 8
0.105 0.081 -0.749 9
0.004 0.211 -1.1 8
0.003 0.19 -0.99 7
-0.093 0.375 -1.087 10
-0.141 0.537 -1.041 8
-0.18 0.613 -0.906 9
-0.144 0.505 -0.566 8
-0.054 0.344 -0.214 8
0.033 0.272 0.05 9
0.03 0.245 0.045 8
0.076 0.28 0.281 9
0.176 0.332 0.541 8
0.347 0.313 0.728 8
0.459 0.386 0.625 9
0.467 0.63 0.315 7
0.329 0.883 0.088 10
0.296 0.794 0.079 8
0.09 0.991 0.03 8
-0.03 1.09 0.162 9
-0.069 1.101 0.4 8
-0.057 1.062 0.619 9
-0.004 0.974 0.814 8
0.026 0.86 1.012 8
0.024 0.774 0.911 9
-0.009 0.653 1.091 8
-0.08 0.569 1.155 9
-0.15 0.56 1.092 6
-0.214 0.554 0.916 10
-0.265 0.532 0.667 9
-0.282 0.502 0.422 8
-0.253 0.451 0.38 9
-0.276 0.419 0.155 8
-0.32 0.389 0.004 8
-0.373 0.358 -0.026 9
-0.429 0.312 0.064 8
-0.502 0.217 0.247 8
-0.592 0.078 0.428 9
-0.532 0.07 0.385 8
-0.622 -0.055 0.503 7
-0.741 -0.185 0.569 10
-0.862 -0.334 0.702 8
-0.905 -0.451 0.999 9
-0.891 -0.524 1.326 8
-0.841 -0.575 1.554 9
-0.756 -0.517 1.399 8
-0.686 -0.602 1.538 8
-0.605 -0.7 1.581 9
-0.464 -0.785 1.446 8
-0.244 -0.86 1.126 9
-0.049 -0.914 0.77 8
-0.044 -0.822 0.693 7
0.048 -0.875 0.438 10
0.043 -0.913 0.365 8
-0.071 -0.93 0.389 9
-0.232 -0.909 0.359 8
-0.331 -0.849 0.163 8
-0.339 -0.774 -0.205 9
-0.224 -0.686 -0.632 8
-0.201 -0.617 -0.569 8
-0.006 -0.522 -0.983 9
0.166 -0.423 -1.272 8
0.287 -0.335 -1.392 9
0.342 -0.244 -1.447 6
0.353 -0.145 -1.463 10
0.356 -0.065 -1.404 9
0.32 -0.058 -1.264 8
0.336 -0.012 -1.174 9
0.358 0.003 -1.079 8
0.354 -0.006 -0.997 8
0.327 -0.037 -0.927 9
0.282 -0.081 -0.899 8
0.223 -0.12 -0.901 9
0.201 -0.108 -0.811 8
0.135 -0.145 -0.769 8
0.066 -0.186 -0.66 7
-0.023 -0.222 -0.554 10
-0.114 -0.255 -0.442 9
-0.174 -0.295 -0.304 8
-0.193 -0.346 -0.18 8
-0.174 -0.312 -0.162 9
-0.147 -0.375 -0.071 8
-0.086 -0.432 -0.006 9
-0.012 -0.486 0.054 8
0.053 -0.556 0.091 8
0.102 -0.613 0.102 9
0.15 -0.657 0.106 8
0.135 -0.591 0.095 7
0.197 -0.644 0.063 10
0.231 -0.61 -0.048 8
0.199 -0.404 -0.185 9
0.107 -0.112 -0.252 8
0.017 0.135 -0.227 8
0.002 0.296 -0.165 9
0.002 0.266 -0.149 8
0.074 0.342 -0.05 9
0.169 0.327 0.084 8
0.213 0.3 0.197 8
0.21 0.315 0.326 9
0.192 0.321 0.479 7
0.164 0.323 0.488 10
0.148 0.291 0.439 8
0.1 0.371 0.244 8
0.035 0.525 -0.053 9
-0.022 0.712 -0.392 8
-0.078 0.882 -0.64 9
-0.143 0.995 -0.683 8
-0.19 1.086 -0.535 8
-0.171 0.978 -0.482 9
-0.169 1.034 -0.235 8
-0.082 0.921 0.006 8
0.062 0.679 0.166 7
0.165 0.426 0.231 10
0.155 0.227 0.244 9
0.032 0.138 0.201 8
0.029 0.124 0.181 8
-0.131 0.113 0.02 9
-0.237 0.129 -0.258 8
-0.261 0.147 -0.513 9
-0.228 0.155 -0.699 8
-0.136 0.153 -0.81 8
-0.012 0.128 -0.771 9
-0.011 0.115 -0.694 8
0.097 0.043 -0.539 7
0.177 -0.075 -0.311 10
0.222 -0.182 -0.035 8
0.23 -0.233 0.195 9
0.216 -0.223 0.297 8
0.181 -0.19 0.298 9
0.163 -0.171 0.268 8
0.109 -0.142 0.248 8
0.055 -0.102 0.232 9
0.024 -0.026 0.184 8
0.008 0.042 0.129 9
0.001 0.048 0.116 8
0.001 0.043 0.104 7
0.004 0.047 0.159 10
0.002 0.073 0.25 8
-0.012 0.126 0.348 9
-0.029 0.167 0.438 8
-0.082 0.161 0.459 8
-0.126 0.171 0.385 9
-0.093 0.184 0.278 8
-0.083 0.165 0.25 8
-0.011 0.116 0.163 9
0.035 0.034 0.106 8
0.045 0.0 0.045 9
0.033 0.032 -0.027 6
-0.042 0.096 -0.027 10
-0.038 0.159 0.04 9
-0.034 0.143 0.036 8
-0.236 0.195 0.072 9
-0.236 0.213 0.039 8
-0.19 0.193 -0.007 8
-0.124 0.152 -0.022 9
-0.04 0.103 -0.034 8
-0.036 0.093 -0.031 9
0.035 0.055 -0.06 8
0.082 0.035 -0.086 8
0.118 -0.002 -0.118 7
0.13 -0.033 -0.158 10
0.085 0.005 -0.134 9
0.005 0.074 -0.038 8
0.004 0.067 -0.034 8
-0.027 0.088 0.029 9
0.016 0.049 0.051 8
0.08 -0.031 0.073 8
0.131 -0.093 0.066 9
0.149 -0.109 0.009 8
0.142 -0.083 -0.049 9
0.128 -0.075 -0.044 8
0.103 -0.01 -0.092 7
0.066 0.057 -0.107 10
0.021 0.102 -0.051 8
-0.032 0.117 0.038 9
-0.058 0.109 0.105 8
-0.04 0.092 0.138 8
-0.036 0.083 0.125 9
0.004 0.069 0.135 8
0.043 0.041 0.118 9
0.075 0.01 0.039 8
0.091 0.015 -0.096 8
0.085 0.055 -0.215 9
0.077 0.049 -0.193 6
0.053 0.082 -0.235 11
0.034 0.085 -0.199 8
0.039 0.066 -0.127 8
0.061 0.015 -0.072 9
0.08 -0.055 -0.048 8
0.077 -0.134 -0.069 8
0.063 -0.184 -0.03 9
0.056 -0.166 -0.027 8
-0.016 -0.113 0.071 9
-0.127 0.0 0.096 8
-0.159 0.083 0.037 8
-0.108 0.126 -0.05 7
-0.014 0.136 -0.067 10
0.054 0.134 0.008 9
0.049 0.12 0.008 8
0.057 0.124 0.105 8
0.041 0.117 0.165 9
0.035 0.092 0.171 8
0.04 0.063 0.104 9
0.03 0.036 -0.018 8
# end
#Thu Feb 26 20:23:20 GMT+08:00 2015.
