# Supplementary material for: Abnormal Gait Behavior Detection for Elderly Based on Enhanced Wigner-Ville Analysis and Cloud Incremental SVM Learning
Source: Hindawi journal article supplement (doi:10.1155/2016/5869238), 2016-01-01
Supplement: f1 [file 5869238.f1.zip › Supplementary Materials/Original Data/Climbing three steps/original__39.txt]

# Accelerometer Values
# filename:  original__39.txt
# Saving start time: Thu Feb 26 20:23:23 GMT+08:00 2015

# sensor resolution: 0.0095825195m/s^2
#Sensorvendor: KIONIX, name: KX023 Accelerometer, type: 1,version : 1, range 39.240005

# X value, Y value, Z value, time diff in ms
-0.006 0.019 0.085 8
0.028 -0.007 -0.058 9
0.041 -0.024 -0.174 8
0.042 -0.044 -0.215 8
0.047 -0.07 -0.192 9
0.054 -0.072 -0.158 8
0.049 -0.064 -0.142 7
0.049 -0.049 -0.133 10
0.05 -0.044 -0.16 8
0.065 -0.042 -0.188 9
0.091 -0.054 -0.173 8
0.102 -0.093 -0.101 9
0.082 -0.124 0.008 8
0.074 -0.112 0.008 8
0.038 -0.09 0.103 9
0.0 -0.025 0.137 8
-0.025 0.023 0.102 9
-0.03 0.044 0.026 8
-0.024 0.059 -0.076 7
-0.019 0.066 -0.165 10
-0.017 0.06 -0.148 8
-0.015 0.06 -0.163 9
-0.019 0.065 -0.15 8
-0.022 0.07 -0.152 8
-0.018 0.063 -0.103 9
-0.015 0.046 0.005 8
-0.022 0.035 0.123 8
-0.02 0.031 0.111 9
-0.035 0.032 0.202 8
-0.039 0.031 0.245 9
-0.02 0.024 0.225 6
0.002 0.016 0.135 10
0.01 0.01 -0.011 9
0.01 0.009 -0.15 8
0.009 0.008 -0.135 9
0.006 0.011 -0.222 8
0.0 0.014 -0.23 8
0.0 0.01 -0.165 9
0.003 -0.001 -0.07 8
-0.001 -0.017 0.006 9
0.0 -0.027 0.051 8
0.0 -0.024 0.046 8
0.017 -0.039 0.088 7
0.034 -0.061 0.122 10
0.031 -0.069 0.143 9
0.017 -0.051 0.147 8
0.0 -0.019 0.105 8
-0.016 0.011 0.0 9
-0.014 0.01 0.0 8
-0.019 0.036 -0.15 8
-0.017 0.049 -0.285 9
-0.019 0.05 -0.339 8
-0.014 0.037 -0.292 9
0.0 0.004 -0.184 8
0.0 0.004 -0.166 7
0.006 -0.034 -0.053 10
0.007 -0.065 0.039 8
0.009 -0.08 0.123 9
0.004 -0.084 0.18 8
0.001 -0.07 0.186 8
-0.011 -0.039 0.168 9
-0.045 -0.012 0.136 8
-0.041 -0.011 0.123 9
-0.085 0.013 0.09 8
-0.128 0.029 0.067 8
-0.163 0.041 0.04 9
-0.196 0.056 -0.009 6
-0.202 0.069 -0.062 11
-0.158 0.072 -0.084 8
-0.142 0.065 -0.076 8
-0.066 0.045 -0.072 9
0.009 0.01 -0.048 8
0.044 -0.016 0.012 9
0.035 -0.017 0.114 8
-0.004 -0.008 0.216 8
-0.043 -0.009 0.269 9
-0.038 -0.008 0.242 8
-0.051 -0.009 0.238 8
-0.057 0.003 0.19 7
-0.052 0.025 0.128 10
-0.055 0.055 0.039 9
-0.107 0.102 -0.09 8
-0.193 0.156 -0.2 8
-0.173 0.14 -0.18 9
-0.271 0.165 -0.209 8
-0.367 0.146 -0.133 9
-0.448 0.105 -0.016 8
-0.506 0.059 0.063 8
-0.551 0.025 0.048 9
-0.561 -0.006 -0.095 8
-0.505 -0.005 -0.085 7
-0.488 -0.034 -0.289 10
-0.465 -0.044 -0.426 8
-0.44 -0.041 -0.442 9
-0.404 -0.041 -0.376 8
-0.365 -0.038 -0.255 9
-0.321 -0.03 -0.102 8
-0.289 -0.027 -0.092 8
-0.245 -0.013 0.055 9
-0.193 0.0 0.184 8
-0.111 0.015 0.259 9
-0.001 0.025 0.242 8
0.119 0.025 0.176 7
0.234 0.018 0.111 10
0.211 0.016 0.1 8
0.31 0.012 0.009 9
0.385 0.019 -0.133 8
0.414 0.03 -0.274 8
0.405 0.036 -0.354 9
0.38 0.029 -0.381 8
0.339 -0.02 -0.383 8
0.305 -0.018 -0.345 9
0.244 -0.093 -0.338 8
0.175 -0.138 -0.315 9
0.135 -0.163 -0.279 6
0.146 -0.174 -0.26 10
0.199 -0.16 -0.278 9
0.262 -0.135 -0.305 8
0.236 -0.121 -0.275 9
0.283 -0.094 -0.293 8
0.304 -0.077 -0.256 8
0.284 -0.107 -0.149 9
0.225 -0.185 0.0 8
0.138 -0.262 0.176 9
0.025 -0.298 0.311 8
0.022 -0.268 0.28 8
-0.065 -0.265 0.341 7
-0.099 -0.256 0.364 10
-0.087 -0.216 0.344 8
-0.017 -0.113 0.251 9
0.085 0.008 0.122 8
0.164 0.102 0.01 9
0.147 0.091 0.009 8
0.178 0.155 -0.015 8
0.166 0.179 0.068 9
0.11 0.17 0.185 8
0.012 0.175 0.303 9
-0.113 0.194 0.399 8
-0.101 0.175 0.359 7
-0.2 0.228 0.398 10
-0.204 0.342 0.382 8
-0.114 0.474 0.315 9
0.022 0.581 0.225 8
0.161 0.655 0.14 8
0.268 0.694 0.083 9
0.241 0.696 0.094 8
0.217 0.627 0.085 9
0.317 0.609 0.151 8
0.277 0.585 0.224 8
0.202 0.554 0.267 9
0.14 0.529 0.28 6
0.11 0.535 0.281 11
0.099 0.482 0.366 8
0.1 0.434 0.329 8
0.1 0.596 0.629 9
0.06 0.697 1.102 8
-0.035 0.865 1.535 8
-0.173 1.053 1.759 9
-0.254 1.2 1.802 8
-0.228 1.08 1.622 9
-0.16 1.13 1.548 8
0.055 1.002 1.287 8
0.396 0.805 0.883 7
0.715 0.619 0.584 10
0.893 0.374 0.462 9
0.977 0.039 0.456 8
0.88 0.035 0.41 8
0.914 -0.272 0.532 9
0.963 -0.505 0.667 8
1.033 -0.765 0.744 9
1.037 -1.021 0.777 8
0.926 -1.165 0.736 8
0.702 -1.229 0.501 9
0.631 -1.106 0.451 8
0.43 -1.161 0.016 7
0.382 -1.225 -0.518 10
0.447 -1.309 -0.999 8
0.508 -1.383 -1.287 9
0.47 -1.395 -1.339 8
0.321 -1.34 -1.217 8
0.288 -1.206 -1.095 9
0.137 -1.163 -0.867 8
0.072 -1.169 -0.559 9
0.055 -1.21 -0.28 8
0.006 -1.206 -0.128 8
-0.089 -1.119 -0.131 9
-0.08 -1.007 -0.118 7
-0.225 -0.888 -0.218 10
-0.396 -0.773 -0.374 8
-0.491 -0.7 -0.521 8
-0.491 -0.693 -0.632 9
-0.466 -0.709 -0.801 8
-0.45 -0.733 -1.023 9
-0.432 -0.808 -1.166 8
-0.388 -0.727 -1.049 8
-0.368 -0.812 -1.081 9
-0.365 -0.852 -1.057 8
-0.363 -0.851 -1.046 9
-0.332 -0.821 -1.108 6
-0.256 -0.807 -1.128 10
-0.125 -0.855 -1.0 9
-0.112 -0.769 -0.9 8
0.001 -0.796 -0.731 9
0.048 -0.693 -0.602 8
0.081 -0.553 -0.524 8
0.15 -0.461 -0.462 9
0.214 -0.418 -0.387 8
0.237 -0.411 -0.282 8
0.214 -0.369 -0.254 9
0.193 -0.338 -0.114 8
0.131 -0.253 0.062 7
0.027 -0.132 0.214 10
-0.097 0.086 0.234 8
-0.181 0.406 0.106 9
-0.208 0.697 -0.032 8
-0.188 0.627 -0.029 9
-0.15 0.818 -0.088 8
-0.016 0.929 -0.099 8
0.131 0.994 -0.025 9
0.206 1.043 0.184 8
0.229 1.139 0.441 9
0.23 1.259 0.626 8
0.207 1.133 0.563 7
0.201 1.221 0.679 10
0.198 1.295 0.719 8
0.184 1.374 0.653 9
0.147 1.45 0.53 8
0.065 1.5 0.427 8
-0.066 1.476 0.366 9
-0.06 1.328 0.329 8
-0.197 1.264 0.345 9
-0.291 1.174 0.445 8
-0.308 1.079 0.588 8
-0.297 1.008 0.75 9
-0.3 0.994 0.864 6
-0.28 1.043 0.882 10
-0.252 0.938 0.793 9
-0.181 0.982 0.732 8
-0.058 0.938 0.543 9
0.051 0.818 0.318 8
0.057 0.663 0.212 8
-0.086 0.521 0.214 9
-0.321 0.392 0.258 8
-0.288 0.352 0.232 9
-0.543 0.235 0.337 8
-0.826 0.139 0.459 8
-1.106 0.054 0.536 7
-1.349 -0.055 0.643 10
-1.547 -0.178 0.8 9
-1.635 -0.284 0.96 8
-1.471 -0.256 0.864 8
-1.432 -0.347 1.012 9
-1.234 -0.437 1.087 8
-0.902 -0.552 1.059 9
-0.551 -0.696 0.962 8
-0.257 -0.873 0.861 8
-0.034 -1.047 0.786 9
-0.03 -0.943 0.708 8
0.112 -1.096 0.623 7
0.172 -1.193 0.442 10
0.171 -1.249 0.144 8
0.152 -1.3 -0.175 9
0.138 -1.312 -0.433 8
0.119 -1.278 -0.677 8
0.107 -1.15 -0.61 9
0.077 -1.116 -0.849 8
0.052 -1.061 -1.026 9
0.054 -0.982 -1.11 8
0.103 -0.891 -1.102 8
0.167 -0.785 -1.048 9
0.15 -0.706 -0.943 7
0.187 -0.584 -0.884 10
0.184 -0.436 -0.805 8
0.173 -0.301 -0.715 8
0.197 -0.21 -0.631 9
0.259 -0.144 -0.564 8
0.323 -0.085 -0.507 9
0.356 -0.053 -0.438 8
0.32 -0.048 -0.394 8
0.324 -0.047 -0.34 9
0.311 -0.054 -0.319 8
0.29 -0.074 -0.328 9
0.256 -0.132 -0.391 6
0.206 -0.207 -0.465 10
0.145 -0.27 -0.523 9
0.13 -0.243 -0.471 8
0.049 -0.289 -0.514 8
-0.024 -0.319 -0.485 9
-0.046 -0.37 -0.408 8
0.0 -0.418 -0.342 9
0.072 -0.443 -0.245 8
0.135 -0.482 -0.096 8
0.121 -0.434 -0.086 9
0.157 -0.449 0.014 8
0.174 -0.374 0.018 7
0.196 -0.217 -0.046 10
0.241 -0.066 -0.135 8
0.276 0.039 -0.23 9
0.257 0.146 -0.326 8
0.232 0.131 -0.293 9
0.165 0.256 -0.347 8
0.092 0.366 -0.327 8
0.032 0.436 -0.267 9
-0.013 0.483 -0.183 8
-0.039 0.547 -0.072 9
-0.041 0.629 0.059 8
-0.037 0.566 0.053 7
-0.018 0.632 0.169 10
0.006 0.714 0.232 8
0.02 0.83 0.248 9
0.019 0.917 0.247 8
0.0 0.955 0.244 8
-0.047 0.968 0.259 9
-0.043 0.871 0.233 8
-0.085 0.884 0.312 8
-0.097 0.878 0.443 9
-0.107 0.874 0.584 8
-0.132 0.878 0.734 9
-0.15 0.855 0.841 6
-0.126 0.819 0.85 10
-0.114 0.737 0.765 9
-0.037 0.705 0.7 8
0.068 0.66 0.577 9
0.174 0.63 0.428 8
0.253 0.613 0.336 8
0.271 0.607 0.333 9
0.202 0.628 0.379 8
0.182 0.565 0.341 9
0.071 0.596 0.387 8
-0.022 0.59 0.397 8
-0.083 0.549 0.376 7
-0.12 0.489 0.343 10
-0.152 0.444 0.296 9
-0.17 0.417 0.237 8
-0.153 0.375 0.214 8
-0.123 0.351 0.123 9
-0.038 0.32 -0.014 8
0.071 0.277 -0.139 8
0.185 0.23 -0.209 9
0.279 0.193 -0.209 8
0.345 0.124 -0.07 9
0.311 0.112 -0.063 8
0.372 -0.057 0.161 7
0.462 -0.293 0.443 10
0.573 -0.499 0.798 8
0.646 -0.722 1.069 9
0.696 -0.996 1.184 8
0.781 -1.221 1.173 8
0.703 -1.099 1.056 9
0.816 -1.238 0.935 8
0.882 -1.298 0.632 9
0.854 -1.313 0.184 8
0.739 -1.308 -0.261 8
0.604 -1.313 -0.65 9
0.544 -1.181 -0.585 6
0.434 -1.241 -0.89 11
0.341 -1.34 -1.045 8
0.281 -1.39 -1.066 8
0.258 -1.369 -1.016 9
0.206 -1.312 -0.938 8
0.087 -1.199 -0.858 9
-0.044 -1.047 -0.78 8
-0.039 -0.942 -0.702 8
-0.206 -0.75 -0.597 9
-0.393 -0.479 -0.431 8
-0.513 -0.185 -0.256 8
-0.549 0.043 -0.112 7
-0.507 0.2 0.001 10
-0.409 0.314 0.066 9
-0.368 0.283 0.06 8
-0.251 0.349 0.082 8
-0.159 0.364 0.087 9
-0.134 0.362 0.078 8
-0.158 0.362 0.046 9
-0.196 0.356 -0.058 8
-0.231 0.36 -0.242 8
-0.208 0.324 -0.217 9
-0.217 0.33 -0.367 8
-0.218 0.315 -0.433 7
-0.224 0.288 -0.446 10
-0.214 0.243 -0.41 8
-0.178 0.175 -0.349 9
-0.129 0.097 -0.285 8
-0.116 0.088 -0.256 9
-0.085 0.021 -0.19 8
-0.08 -0.051 -0.137 8
-0.085 -0.135 -0.124 9
-0.117 -0.205 -0.135 8
-0.18 -0.243 -0.154 8
-0.24 -0.255 -0.177 9
-0.216 -0.23 -0.159 7
-0.236 -0.226 -0.203 10
-0.215 -0.207 -0.28 8
-0.172 -0.167 -0.342 8
-0.135 -0.097 -0.363 9
-0.113 -0.016 -0.376 8
-0.066 0.047 -0.398 9
-0.06 0.042 -0.358 8
-0.003 0.071 -0.394 8
0.016 0.076 -0.443 9
-0.014 0.082 -0.485 8
-0.052 0.099 -0.483 9
-0.047 0.089 -0.434 6
-0.024 0.172 -0.494 10
-0.022 0.154 -0.445 9
0.036 0.209 -0.466 8
0.079 0.282 -0.402 9
0.084 0.373 -0.19 8
0.058 0.47 0.1 8
0.025 0.553 0.324 9
0.015 0.642 0.534 8
0.013 0.577 0.48 9
0.033 0.68 0.668 8
0.083 0.741 0.694 8
0.211 0.773 0.547 7
0.377 0.794 0.348 10
0.478 0.826 0.213 8
0.515 0.863 0.149 9
0.464 0.777 0.134 8
0.456 0.774 0.215 9
0.414 0.732 0.502 8
0.358 0.669 0.897 8
0.301 0.59 1.277 9
0.23 0.546 1.542 8
0.084 0.553 1.616 9
0.075 0.498 1.454 8
-0.135 0.525 1.353 7
-0.353 0.537 1.126 10
-0.555 0.554 0.946 8
-0.756 0.589 0.889 9
-0.918 0.612 0.817 8
-1.037 0.602 0.742 8
-0.934 0.542 0.668 9
-1.05 0.51 0.697 8
-1.101 0.466 0.746 9
-1.074 0.396 0.782 8
-1.002 0.261 0.844 8
-0.908 0.029 0.936 9
-0.818 0.026 0.843 6
-0.742 -0.226 0.934 11
-0.68 -0.414 0.949 8
-0.618 -0.584 0.873 8
-0.545 -0.762 0.737 9
-0.419 -0.877 0.537 8
-0.213 -0.927 0.302 8
-0.01 -0.991 0.106 9
-0.009 -0.891 0.095 8
0.13 -0.958 -0.008 9
0.228 -1.01 -0.094 8
0.296 -1.096 -0.24 8
0.316 -1.192 -0.427 7
0.283 -1.338 -0.574 10
0.241 -1.485 -0.693 9
0.217 -1.336 -0.624 8
0.153 -1.317 -0.773 8
0.056 -1.08 -0.939 9
-0.013 -0.801 -1.159 8
-0.029 -0.618 -1.348 9
-0.005 -0.464 -1.454 8
0.026 -0.326 -1.463 8
0.023 -0.294 -1.317 9
0.057 -0.224 -1.216 8
0.108 -0.218 -1.061 7
0.16 -0.249 -0.922 10
0.215 -0.308 -0.809 8
0.291 -0.33 -0.727 9
0.262 -0.297 -0.655 8
0.291 -0.227 -0.589 8
0.256 -0.123 -0.516 9
0.184 0.006 -0.471 8
0.08 0.157 -0.437 9
-0.024 0.249 -0.409 8
-0.063 0.269 -0.402 8
-0.057 0.242 -0.407 9
-0.033 0.217 -0.366 7
0.006 0.091 -0.355 10
0.041 -0.043 -0.294 8
0.038 -0.173 -0.216 8
0.016 -0.279 -0.148 9
0.012 -0.322 -0.077 8
0.011 -0.29 -0.04 9
0.039 -0.261 -0.036 8
0.097 -0.41 -0.045 8
0.17 -0.454 -0.055 9
0.27 -0.38 -0.033 8
0.388 -0.348 -0.017 9
0.349 -0.313 -0.015 6
0.433 -0.319 0.005 10
0.413 -0.287 0.004 9
0.311 0.156 -0.012 8
0.231 0.341 -0.024 9
0.218 0.424 0.057 8
0.22 0.441 0.193 8
0.164 0.461 0.282 9
0.147 0.514 0.331 8
0.041 0.463 0.298 8
-0.043 0.544 0.2 9
-0.049 0.624 -0.029 8
0.0 0.638 -0.257 7
0.021 0.612 -0.471 10
-0.038 0.679 -0.644 8
-0.034 0.827 -0.753 9
-0.166 0.745 -0.677 8
-0.308 0.853 -0.709 9
-0.375 0.866 -0.644 8
-0.338 0.818 -0.462 8
-0.227 0.729 -0.226 9
-0.094 0.559 -0.021 8
-0.084 0.323 0.118 9
-0.076 0.291 0.107 8
0.147 0.085 0.204 7
0.227 -0.071 0.323 10
0.287 -0.186 0.367 8
0.289 -0.237 0.279 9
0.227 -0.251 0.187 8
0.175 -0.265 0.134 8
0.157 -0.238 0.121 9
0.17 -0.237 0.0 8
0.222 -0.211 -0.256 9
0.263 -0.158 -0.511 8
0.269 -0.086 -0.655 8
0.253 -0.013 -0.702 9
0.227 -0.011 -0.631 6
0.229 0.047 -0.598 10
0.235 0.081 -0.462 9
0.21 0.125 -0.257 8
0.154 0.161 -0.015 9
0.101 0.12 0.223 8
0.079 0.046 0.386 8
0.071 0.02 0.428 9
0.064 0.018 0.385 8
0.101 0.032 0.345 9
0.117 0.082 0.276 8
0.111 0.135 0.171 8
0.099 0.204 0.045 7
0.093 0.273 -0.047 10
0.084 0.302 -0.082 9
0.075 0.272 -0.074 8
0.068 0.278 -0.04 8
0.033 0.227 0.061 9
-0.035 0.194 0.14 8
-0.115 0.178 0.17 9
-0.163 0.1 0.18 8
-0.144 0.094 0.165 8
-0.129 0.084 0.148 9
-0.107 0.118 0.125 8
-0.128 0.117 0.088 7
-0.164 0.175 0.027 10
-0.192 0.256 -0.046 8
-0.191 0.291 -0.11 9
-0.165 0.284 -0.146 8
-0.149 0.255 -0.132 8
-0.142 0.242 -0.144 9
-0.148 0.233 -0.145 8
-0.152 0.221 -0.121 9
-0.146 0.202 -0.056 8
-0.127 0.169 0.0 8
-0.103 0.13 0.035 9
-0.092 0.117 0.031 7
-0.067 0.079 0.054 10
-0.04 0.023 0.049 8
-0.004 -0.058 0.051 8
0.034 -0.119 0.069 9
0.043 -0.151 0.095 8
0.013 -0.146 0.133 9
0.012 -0.131 0.12 8
-0.033 -0.054 0.141 8
-0.064 0.038 0.139 9
-0.061 0.082 0.096 8
-0.033 0.081 -0.018 8
-0.03 0.073 -0.017 7
0.011 0.043 -0.287 10
0.01 0.039 -0.259 9
0.016 0.002 -0.288 8
0.024 -0.017 -0.228 8
0.033 -0.037 -0.105 9
0.033 -0.057 -0.006 8
0.022 -0.046 0.029 9
-0.001 -0.015 0.06 8
-0.001 -0.014 0.054 8
-0.032 0.02 0.1 9
-0.059 0.043 0.141 8
-0.079 0.053 0.157 7
-0.075 0.055 0.149 10
-0.053 0.041 0.135 8
-0.047 0.021 0.12 9
-0.042 0.019 0.108 8
-0.055 0.025 0.099 9
-0.084 0.061 0.095 8
-0.105 0.075 0.088 8
-0.1 0.069 0.067 9
-0.082 0.066 -0.007 8
-0.056 0.029 -0.092 9
-0.05 0.026 -0.083 8
-0.024 -0.016 -0.067 7
-0.033 -0.006 0.0 10
-0.044 0.021 0.03 8
-0.028 -0.002 0.05 9
-0.007 -0.029 0.064 8
0.002 0.0 0.069 8
0.002 0.0 0.062 9
0.005 0.04 0.065 8
0.01 0.05 0.064 8
0.015 0.03 0.066 9
0.002 0.008 0.071 8
-0.02 0.002 0.059 9
-0.018 0.002 0.053 6
-0.03 -0.009 0.006 10
-0.028 -0.037 -0.078 9
-0.023 -0.05 -0.171 8
-0.026 -0.025 -0.217 9
-0.029 0.004 -0.219 8
# end
#Thu Feb 26 20:23:28 GMT+08:00 20153
