# Supplementary material for: Abnormal Gait Behavior Detection for Elderly Based on Enhanced Wigner-Ville Analysis and Cloud Incremental SVM Learning
Source: Hindawi journal article supplement (doi:10.1155/2016/5869238), 2016-01-01
Supplement: f1 [file 5869238.f1.zip › Supplementary Materials/Original Data/Climbing three steps/original__40.txt]

# Accelerometer Values
# filename:  original__40.txt
# Saving start time: Thu Feb 26 20:23:37 GMT+08:00 2015

# sensor resolution: 0.0095825195m/s^2
#Sensorvendor: KIONIX, name: KX023 Accelerometer, type: 1,version : 1, range 39.240005

# X value, Y value, Z value, time diff in ms
0.12 -0.097 -0.283 9
0.207 -0.095 -0.167 8
0.372 -0.118 -0.04 9
0.545 -0.165 0.067 8
0.648 -0.206 0.115 8
0.685 -0.201 0.121 9
0.617 -0.181 0.109 8
0.594 -0.109 0.057 9
0.52 0.011 -0.106 8
0.434 0.128 -0.333 8
0.349 0.209 -0.601 7
0.24 0.253 -0.849 10
0.133 0.292 -0.996 9
0.12 0.263 -0.896 8
0.097 0.285 -0.868 8
0.1 0.263 -0.581 9
0.008 0.253 -0.227 8
-0.151 0.292 0.05 9
-0.308 0.337 0.268 8
-0.443 0.378 0.385 8
-0.399 0.34 0.347 9
-0.486 0.376 0.317 8
-0.501 0.343 0.167 7
-0.459 0.244 -0.016 10
-0.406 0.144 -0.235 8
-0.364 0.067 -0.486 9
-0.323 0.002 -0.677 8
-0.29 0.002 -0.609 8
-0.231 -0.068 -0.663 9
-0.132 -0.199 -0.496 8
-0.045 -0.404 -0.176 9
-0.029 -0.581 0.145 8
-0.063 -0.677 0.399 8
-0.098 -0.712 0.539 9
-0.088 -0.64 0.485 6
-0.054 -0.636 0.506 11
0.067 -0.604 0.396 8
0.195 -0.524 0.239 8
0.236 -0.401 0.17 9
0.191 -0.252 0.215 8
0.155 -0.115 0.323 9
0.139 -0.103 0.291 8
0.145 -0.043 0.429 8
0.164 -0.024 0.541 9
0.17 0.049 0.625 8
0.159 0.18 0.682 8
0.156 0.296 0.639 7
0.192 0.381 0.526 10
0.173 0.343 0.473 9
0.184 0.448 0.367 8
0.121 0.595 0.301 8
0.039 0.711 0.27 9
-0.028 0.796 0.239 8
-0.092 0.849 0.227 9
-0.152 0.847 0.294 8
-0.137 0.762 0.264 8
-0.189 0.734 0.47 9
-0.24 0.689 0.744 8
-0.3 0.649 0.948 7
-0.395 0.607 1.068 10
-0.499 0.557 1.062 8
-0.572 0.528 0.948 9
-0.514 0.475 0.854 8
-0.565 0.473 0.758 9
-0.614 0.494 0.701 8
-0.692 0.532 0.747 8
-0.792 0.548 0.859 9
-0.861 0.529 0.954 8
-0.915 0.428 0.995 8
-0.824 0.386 0.896 9
-0.953 0.236 0.865 7
-1.117 0.123 0.854 10
-1.257 0.035 0.929 8
-1.322 -0.076 1.068 8
-1.288 -0.237 1.263 9
-1.188 -0.425 1.446 8
-1.069 -0.383 1.301 9
-0.87 -0.547 1.384 8
-0.495 -0.641 1.251 8
-0.124 -0.711 0.862 9
0.078 -0.817 0.387 8
0.163 -0.968 0.021 9
0.146 -0.871 0.018 6
0.173 -1.044 -0.146 10
0.169 -1.185 -0.147 9
0.16 -1.336 -0.083 8
0.195 -1.534 -0.045 9
0.351 -1.711 -0.062 8
0.585 -1.781 -0.127 8
0.778 -1.725 -0.255 9
0.701 -1.552 -0.23 8
0.818 -1.439 -0.462 9
0.883 -1.312 -0.729 8
0.912 -1.199 -0.962 8
0.858 -1.097 -1.177 7
0.716 -0.987 -1.349 10
0.505 -0.861 -1.431 8
0.454 -0.775 -1.288 9
0.208 -0.675 -1.306 8
-0.025 -0.621 -1.327 9
-0.202 -0.593 -1.372 8
-0.289 -0.56 -1.369 8
-0.294 -0.529 -1.255 9
-0.232 -0.522 -1.056 8
-0.209 -0.47 -0.95 9
-0.127 -0.481 -0.785 8
-0.041 -0.479 -0.681 7
0.08 -0.516 -0.583 10
0.199 -0.584 -0.497 8
0.248 -0.603 -0.466 9
0.195 -0.499 -0.469 8
0.175 -0.449 -0.422 8
0.09 -0.274 -0.441 9
0.058 -0.15 -0.479 8
0.106 -0.066 -0.514 9
0.195 0.025 -0.467 8
0.268 0.139 -0.338 8
0.311 0.33 -0.209 9
0.28 0.297 -0.188 6
0.298 0.561 -0.06 10
0.293 0.796 0.064 9
0.271 0.992 0.149 8
0.22 1.246 0.17 9
0.155 1.505 0.147 8
0.105 1.666 0.13 8
0.095 1.499 0.117 9
0.072 1.64 0.164 8
0.078 1.745 0.345 9
0.122 1.735 0.65 8
0.209 1.654 1.071 8
0.188 1.489 0.964 7
0.43 1.537 2.097 10
0.387 1.383 1.887 9
0.425 1.382 2.249 8
0.443 1.45 2.362 8
0.515 1.496 2.254 9
0.637 1.465 1.925 8
0.721 1.347 1.429 9
0.729 1.162 0.878 8
0.656 1.046 0.79 8
0.628 0.834 0.21 9
0.591 0.588 -0.281 8
0.546 0.358 -0.643 7
0.503 0.121 -0.929 10
0.484 -0.192 -0.952 8
0.485 -0.542 -0.518 9
0.436 -0.488 -0.466 8
0.417 -0.841 0.4 8
0.357 -1.122 1.421 9
0.303 -1.274 2.193 8
0.324 -1.337 2.414 9
0.451 -1.368 2.058 8
0.405 -1.231 1.229 8
0.548 -1.281 1.106 9
0.604 -1.359 0.024 7
0.595 -1.402 -0.998 10
0.534 -1.406 -1.641 8
0.387 -1.443 -1.778 8
0.186 -1.46 -1.576 9
0.168 -1.314 -1.418 8
-0.013 -1.269 -1.141 9
-0.163 -1.184 -0.937 8
-0.334 -1.077 -0.881 8
-0.545 -0.944 -0.989 9
-0.732 -0.795 -1.142 8
-0.834 -0.61 -1.301 9
-0.751 -0.549 -1.17 6
-0.738 -0.374 -1.411 10
-0.624 -0.26 -1.603 9
-0.473 -0.178 -1.68 8
-0.35 -0.096 -1.666 9
-0.28 -0.004 -1.515 8
-0.264 0.086 -1.23 8
-0.237 0.077 -1.107 9
-0.235 0.16 -0.695 8
-0.232 0.172 -0.19 8
-0.234 0.112 0.241 9
-0.193 0.066 0.465 8
-0.092 0.004 0.457 7
0.049 -0.116 0.302 10
0.044 -0.104 0.272 8
0.161 -0.247 0.092 9
0.142 -0.345 -0.028 8
0.0 -0.376 -0.114 9
-0.169 -0.389 -0.185 8
-0.313 -0.396 -0.235 8
-0.407 -0.373 -0.276 9
-0.366 -0.336 -0.248 8
-0.433 -0.284 -0.319 9
-0.469 -0.199 -0.367 8
-0.439 -0.079 -0.316 7
-0.335 0.054 -0.239 10
-0.194 0.181 -0.225 8
-0.063 0.317 -0.279 9
-0.056 0.285 -0.251 8
0.038 0.432 -0.334 8
0.092 0.554 -0.39 9
0.124 0.627 -0.442 8
0.169 0.67 -0.506 9
0.234 0.717 -0.534 8
0.296 0.829 -0.517 8
0.267 0.746 -0.465 9
0.325 0.954 -0.4 6
0.393 1.127 -0.232 10
0.442 1.201 -0.006 9
0.442 1.214 0.17 8
0.415 1.169 0.299 9
0.366 1.123 0.389 8
0.329 1.011 0.35 8
0.263 1.042 0.385 9
0.22 1.11 0.378 8
0.227 1.17 0.356 9
0.241 1.192 0.328 8
0.227 1.162 0.297 8
0.204 1.046 0.268 7
0.166 0.996 0.244 10
0.116 0.932 0.222 9
0.056 0.869 0.194 8
0.018 0.801 0.17 8
0.025 0.711 0.181 9
0.023 0.614 0.339 8
-0.011 0.529 0.643 9
-0.01 0.476 0.579 8
-0.088 0.399 0.951 8
-0.188 0.281 1.337 9
-0.293 0.118 1.591 8
-0.434 -0.013 1.634 7
-0.586 -0.06 1.508 10
-0.703 -0.074 1.203 8
-0.633 -0.067 1.083 9
-0.681 -0.081 0.614 8
-0.657 -0.099 0.051 8
-0.633 -0.152 -0.441 9
-0.653 -0.234 -0.699 8
-0.719 -0.317 -0.716 9
-0.83 -0.395 -0.42 8
-0.747 -0.356 -0.378 8
-0.846 -0.513 0.246 9
-0.856 -0.76 1.0 7
-0.781 -0.991 1.687 10
-0.649 -1.141 2.161 8
-0.496 -1.23 2.303 8
-0.366 -1.262 2.096 9
-0.33 -1.136 1.886 8
-0.27 -1.079 1.402 9
-0.219 -0.99 0.8 8
-0.158 -0.921 0.212 8
-0.152 -0.86 -0.313 9
-0.207 -0.863 -0.581 8
-0.285 -0.973 -0.515 9
-0.257 -0.876 -0.463 6
-0.329 -1.038 -0.243 10
-0.369 -1.135 -0.045 9
-0.378 -1.135 0.048 8
-0.342 -1.081 -0.007 8
-0.227 -0.989 -0.247 9
-0.048 -0.869 -0.542 8
-0.043 -0.782 -0.487 9
0.113 -0.64 -0.714 8
0.205 -0.455 -0.837 8
0.24 -0.301 -0.817 9
0.228 -0.185 -0.707 8
0.184 -0.059 -0.573 7
0.144 0.043 -0.491 10
0.13 0.038 -0.441 8
0.125 0.099 -0.436 9
0.126 0.156 -0.446 8
0.094 0.243 -0.397 9
0.062 0.306 -0.27 8
0.065 0.298 -0.12 8
0.071 0.253 -0.011 9
0.064 0.227 -0.01 8
0.072 0.204 0.022 9
0.086 0.225 0.01 8
0.11 0.199 0.002 7
0.124 0.169 -0.014 10
0.072 0.166 -0.032 8
-0.002 0.075 0.064 9
-0.002 0.067 0.058 8
-0.042 -0.088 0.25 8
-0.053 -0.278 0.52 9
-0.039 -0.464 0.817 8
0.026 -0.596 1.016 8
0.114 -0.646 1.001 9
0.24 -0.644 0.835 8
0.216 -0.579 0.752 9
0.429 -0.572 0.437 6
0.667 -0.517 -0.084 10
0.87 -0.399 -0.664 9
0.988 -0.226 -1.133 8
1.008 0.005 -1.359 9
0.946 0.2 -1.365 8
0.851 0.18 -1.228 8
0.722 0.306 -1.082 9
0.499 0.386 -0.842 8
0.231 0.459 -0.61 9
-0.017 0.543 -0.479 8
-0.238 0.603 -0.481 8
-0.214 0.542 -0.433 7
-0.402 0.584 -0.527 10
-0.526 0.659 -0.627 9
-0.571 0.751 -0.706 8
-0.528 0.769 -0.752 8
-0.383 0.684 -0.708 9
-0.205 0.543 -0.584 8
-0.083 0.4 -0.462 8
-0.075 0.36 -0.416 9
-0.041 0.261 -0.301 8
-0.109 0.201 -0.152 9
-0.185 0.172 0.008 8
-0.209 0.161 0.084 7
-0.177 0.152 0.079 10
-0.07 0.115 0.074 8
-0.063 0.103 0.067 9
0.061 0.04 -0.001 8
0.162 0.005 -0.122 8
0.212 0.02 -0.216 9
0.206 0.056 -0.275 8
0.156 0.1 -0.287 9
0.073 0.171 -0.265 8
0.066 0.154 -0.239 8
-0.029 0.218 -0.199 9
-0.063 0.227 -0.163 7
0.02 0.151 -0.123 10
0.199 0.025 -0.017 8
0.416 -0.055 0.182 8
0.553 -0.074 0.389 9
0.498 -0.066 0.35 8
0.482 -0.034 0.415 9
0.398 0.061 0.276 8
0.352 0.182 0.046 8
0.359 0.251 -0.136 9
0.351 0.268 -0.205 8
0.253 0.281 -0.12 8
0.227 0.253 -0.108 7
0.061 0.314 0.091 10
-0.089 0.411 0.221 9
-0.126 0.402 0.158 8
-0.037 0.225 0.007 8
0.075 0.003 -0.11 9
0.085 -0.13 -0.256 8
0.076 -0.117 -0.23 9
-0.047 -0.112 -0.494 8
-0.215 0.008 -0.775 8
-0.34 0.17 -0.998 9
-0.384 0.32 -1.144 8
-0.346 0.288 -1.029 7
-0.263 0.369 -0.87 10
-0.236 0.332 -0.783 8
-0.198 0.286 -0.543 9
-0.165 0.244 -0.279 8
-0.135 0.157 0.029 9
-0.101 0.026 0.299 8
-0.067 -0.096 0.528 8
-0.061 -0.165 0.673 9
-0.055 -0.148 0.606 8
-0.039 -0.172 0.665 8
-0.041 -0.154 0.633 9
-0.034 -0.116 0.513 7
-0.036 -0.092 0.379 10
-0.047 -0.05 0.241 8
-0.042 -0.045 0.15 8
-0.05 -0.04 0.135 9
-0.062 0.102 0.09 8
-0.066 0.136 0.089 9
-0.063 0.104 0.123 8
-0.067 0.089 0.174 8
-0.087 0.129 0.235 9
-0.079 0.116 0.212 8
-0.091 0.154 0.291 9
-0.073 0.126 0.324 6
-0.029 0.037 0.282 10
0.011 -0.01 0.189 9
0.036 -0.031 0.075 8
0.061 -0.057 0.016 9
0.055 -0.051 0.014 8
0.09 -0.066 -0.013 8
0.128 -0.092 -0.058 9
0.159 -0.121 -0.099 8
0.141 -0.108 -0.116 9
0.063 -0.034 -0.12 8
-0.013 0.081 -0.133 8
-0.012 0.073 -0.12 7
-0.051 0.155 -0.157 10
-0.057 0.161 -0.162 8
-0.046 0.114 -0.116 9
-0.021 0.05 -0.055 8
0.021 -0.027 0.03 9
0.092 -0.11 0.167 8
0.083 -0.099 0.15 8
0.146 -0.148 0.267 9
0.147 -0.167 0.325 8
0.065 -0.16 0.352 9
-0.069 -0.041 0.261 8
-0.183 0.169 0.066 7
-0.194 0.254 -0.084 10
-0.174 0.229 -0.075 8
-0.101 0.124 -0.143 9
-0.03 -0.004 -0.164 8
0.0 -0.044 -0.159 8
0.0 -0.034 -0.12 9
-0.002 -0.029 -0.047 8
0.005 -0.042 -0.016 9
0.004 -0.038 -0.014 8
0.026 -0.056 -0.038 8
0.041 -0.054 -0.06 9
0.041 -0.033 -0.083 6
0.058 -0.042 -0.099 11
0.041 -0.013 -0.066 8
-0.059 0.133 0.0 8
-0.053 0.119 0.0 9
-0.13 0.281 0.068 8
-0.109 0.341 0.163 8
-0.04 0.306 0.237 9
0.032 0.234 0.233 8
0.066 0.14 0.209 9
0.06 0.048 0.24 8
0.054 0.043 0.216 8
0.031 -0.012 0.257 7
0.002 -0.023 0.197 10
# end
#Thu Feb 26 20:23:41 GMT+08:00 20150
