# Supplementary material for: Abnormal Gait Behavior Detection for Elderly Based on Enhanced Wigner-Ville Analysis and Cloud Incremental SVM Learning
Source: Hindawi journal article supplement (doi:10.1155/2016/5869238), 2016-01-01
Supplement: f1 [file 5869238.f1.zip › Supplementary Materials/Original Data/Forward fall Ending lying flat/original__62.txt]

# Accelerometer Values
# filename:  original__62.txt
# Saving start time: Thu Feb 26 20:29:19 GMT+08:00 2015

# sensor resolution: 0.0095825195m/s^2
#Sensorvendor: KIONIX, name: KX023 Accelerometer, type: 1,version : 1, range 39.240005

# X value, Y value, Z value, time diff in ms
0.349 0.057 -0.268 9
0.646 0.202 -0.398 8
0.836 0.278 -0.416 9
0.871 0.317 -0.377 8
0.798 0.324 -0.26 8
0.673 0.302 -0.073 9
0.605 0.272 -0.065 8
0.48 0.295 0.137 9
0.253 0.327 0.167 8
-0.006 0.376 0.057 7
-0.091 0.384 0.035 10
0.165 -0.001 0.025 8
0.149 0.0 0.023 9
0.48 -0.327 -0.075 8
0.603 -0.197 -0.2 8
0.673 -0.03 -0.213 9
0.703 0.025 -0.068 8
0.66 0.034 0.114 8
0.536 0.035 0.206 9
0.482 0.032 0.185 8
0.306 0.022 0.236 9
0.159 -0.016 0.354 6
0.063 -0.062 0.613 10
-0.022 -0.146 0.807 9
-0.063 -0.283 0.766 8
-0.045 -0.428 0.524 9
-0.04 -0.385 0.472 8
0.02 -0.435 0.18 8
0.073 -0.311 -0.003 9
0.109 -0.174 -0.13 8
0.1 -0.104 -0.221 9
0.006 -0.064 -0.201 8
-0.142 -0.064 -0.067 8
-0.128 -0.058 -0.06 7
-0.309 -0.107 0.133 10
-0.464 -0.155 0.352 9
-0.549 -0.205 0.427 8
-0.478 -0.312 0.314 8
-0.239 -0.354 0.187 9
0.055 -0.282 0.047 8
0.05 -0.254 0.042 8
0.299 -0.154 -0.106 9
0.366 -0.009 -0.162 8
0.202 0.034 -0.168 9
-0.09 -0.065 -0.125 8
-0.081 -0.058 -0.112 7
-0.357 -0.2 0.396 10
-0.321 -0.18 0.356 8
-0.625 -0.173 0.556 9
-0.595 -0.226 0.512 8
-0.378 -0.247 0.38 8
-0.047 -0.151 0.264 9
0.213 -0.036 0.107 8
0.192 -0.032 0.096 9
0.279 -0.003 -0.169 8
0.225 -0.028 -0.357 8
0.119 0.063 -0.308 9
0.053 0.166 -0.207 6
0.085 0.173 -0.183 11
0.179 0.213 -0.196 8
0.161 0.192 -0.176 8
0.229 0.271 -0.217 9
0.23 0.302 -0.26 8
0.252 0.349 -0.233 9
0.236 0.335 -0.188 8
0.242 0.189 -0.177 8
0.45 0.059 -0.055 9
0.405 0.053 -0.05 8
0.568 0.095 0.044 9
0.5 0.199 -0.044 6
0.446 0.212 -0.203 10
0.419 0.243 -0.325 9
0.298 0.286 -0.384 8
0.201 0.284 -0.364 8
0.18 0.256 -0.327 9
0.135 0.21 -0.163 8
0.098 0.042 0.027 9
0.113 -0.278 0.104 8
0.225 -0.549 0.078 8
0.354 -0.61 0.028 9
0.412 -0.429 -0.031 8
0.371 -0.386 -0.028 7
0.368 -0.066 -0.037 10
0.346 0.087 0.032 8
0.318 -0.01 0.045 9
0.283 -0.078 0.027 8
0.258 -0.007 0.089 9
0.253 -0.003 0.095 8
0.227 -0.002 0.086 8
0.295 -0.151 0.044 9
0.493 -0.277 0.089 8
0.759 -0.287 0.195 8
0.797 -0.228 0.084 9
0.718 -0.205 0.076 7
0.373 0.077 -0.291 10
-0.159 0.546 -0.512 8
-0.547 0.742 -0.636 8
-0.6 0.616 -0.789 9
-0.42 0.431 -0.743 8
-0.22 0.249 -0.46 9
-0.089 0.025 -0.105 8
-0.08 0.023 -0.094 8
0.062 -0.182 0.255 9
0.332 -0.31 0.613 8
0.602 -0.303 0.885 9
0.574 -0.227 0.977 6
0.234 -0.269 0.926 10
-0.161 -0.336 0.767 9
-0.145 -0.302 0.69 8
-0.27 -0.277 0.399 9
-0.151 -0.192 0.023 8
-0.004 -0.125 -0.439 8
0.087 -0.085 -0.873 9
0.078 -0.068 -0.953 8
0.01 -0.127 -0.671 9
0.009 -0.114 -0.604 8
-0.045 -0.203 -0.179 8
-0.06 -0.275 0.189 7
-0.05 -0.326 0.4 10
-0.012 -0.334 0.38 8
0.037 -0.317 0.217 9
0.042 -0.299 0.054 8
0.037 -0.269 0.049 9
0.008 -0.251 -0.124 8
-0.021 -0.236 -0.381 8
-0.013 -0.226 -0.514 9
0.142 -0.225 -0.36 8
0.425 -0.221 -0.231 9
0.591 -0.206 -0.181 8
0.532 -0.186 -0.162 7
0.513 -0.166 -0.08 10
0.417 -0.141 0.065 8
0.251 -0.15 0.161 9
0.164 -0.144 0.15 8
0.285 -0.232 0.135 8
0.256 -0.209 0.121 9
0.414 -0.336 0.202 8
0.506 -0.355 0.456 9
0.605 -0.489 0.7 8
0.661 -0.56 0.853 8
0.603 -0.438 1.063 9
0.543 -0.394 0.957 6
0.461 -0.239 0.978 11
0.452 -0.111 0.529 8
0.448 -0.019 -0.005 8
0.368 0.059 -0.241 9
0.27 0.061 -0.197 8
0.221 -0.045 0.069 8
0.209 -0.133 0.572 9
0.188 -0.12 0.515 8
0.194 -0.28 1.041 9
0.214 -0.478 1.305 8
0.248 -0.482 1.281 8
0.276 -0.356 0.968 7
0.233 -0.185 0.495 10
0.16 -0.044 0.091 9
0.144 -0.039 0.082 8
0.094 0.058 -0.158 8
0.035 0.135 -0.237 9
-0.091 -0.031 -0.089 8
-0.091 -0.152 0.064 9
0.078 -0.078 0.098 8
0.278 -0.125 0.061 8
0.25 -0.113 0.054 9
0.388 -0.035 -0.174 8
0.316 0.053 -0.469 7
0.123 0.043 -0.729 10
-0.085 0.137 -0.85 8
-0.26 0.219 -0.79 9
-0.347 0.204 -0.67 8
-0.312 0.183 -0.603 8
-0.313 0.206 -0.51 9
-0.161 0.077 -0.569 8
0.106 -0.181 -0.716 9
0.291 -0.227 -0.717 8
0.286 -0.189 -0.583 8
0.258 -0.17 -0.525 9
0.104 -0.119 -0.387 7
-0.029 -0.006 -0.356 10
-0.078 0.092 -0.521 8
-0.086 0.166 -0.826 8
-0.1 0.177 -1.194 9
-0.119 0.137 -1.553 8
-0.107 0.123 -1.398 9
-0.082 0.011 -1.639 8
0.061 -0.183 -1.75 8
0.339 -0.359 -1.712 9
0.527 -0.499 -1.526 8
0.434 -0.652 -1.33 9
0.391 -0.587 -1.197 6
0.117 -0.705 -1.057 10
-0.303 -0.854 -1.071 9
-0.615 -0.876 -1.155 8
-0.458 -0.841 -1.231 8
-0.074 -0.947 -1.479 9
0.124 -0.983 -1.863 8
0.088 -0.964 -2.058 9
0.079 -0.868 -1.852 8
-0.116 -0.858 -1.84 8
-0.371 -0.806 -1.772 9
-0.516 -0.725 -1.663 8
-0.498 -0.652 -1.619 7
-0.361 -0.567 -1.853 10
-0.222 -0.485 -2.403 8
-0.199 -0.437 -2.162 9
-0.247 -0.387 -2.7 8
-0.478 -0.36 -2.878 9
-0.62 -0.467 -2.611 8
-0.453 -0.765 -1.814 8
-0.085 -1.037 -0.502 9
0.214 -1.257 0.99 8
0.192 -1.131 0.891 9
0.263 -1.299 2.205 8
0.086 -1.27 3.032 7
-0.224 -1.064 3.08 10
-0.5 -0.78 2.44 8
-0.578 -0.446 1.491 9
-0.52 -0.402 1.342 8
-0.276 -0.034 0.399 8
0.32 0.268 -0.277 9
1.11 0.447 -0.408 8
1.782 0.504 -0.001 9
2.164 0.498 0.732 8
2.246 0.471 1.633 8
2.022 0.424 1.47 9
1.925 0.42 2.324 6
1.793 0.606 2.861 10
1.782 0.978 2.806 9
1.969 1.366 2.234 8
2.31 1.692 1.486 9
2.667 1.887 0.808 8
2.4 1.698 0.728 8
2.703 1.809 0.435 9
2.907 1.871 0.639 8
3.003 1.864 1.237 9
2.924 1.793 2.006 8
2.587 1.808 2.532 8
2.328 1.627 2.279 7
1.841 1.862 2.0 10
1.419 2.209 0.822 9
1.419 2.485 -0.535 8
1.865 2.559 -1.411 8
2.521 2.405 -1.58 9
2.993 2.091 -1.047 8
2.816 1.765 -0.109 9
2.535 1.589 -0.098 8
1.666 1.38 0.804 8
0.215 1.437 1.253 9
-1.345 1.757 0.901 8
-2.35 2.09 -0.124 7
-2.536 2.267 -1.09 10
-1.697 2.27 -1.454 8
-1.527 2.043 -1.309 9
0.023 2.074 -1.235 8
1.227 2.226 -0.822 8
1.413 2.366 -0.11 9
0.649 2.438 0.362 8
-0.518 2.323 0.196 9
-0.467 2.091 0.176 8
-1.252 1.586 -0.424 8
-1.08 0.954 -1.091 9
-0.124 0.537 -1.694 7
0.56 0.288 -2.183 10
0.271 -0.088 -1.88 8
-0.467 -0.641 -0.321 8
-0.421 -0.577 -0.289 9
-0.886 -1.06 2.126 8
-0.807 -1.53 4.698 9
0.06 -2.117 6.368 8
1.361 -2.848 6.176 8
2.998 -3.633 4.203 9
4.718 -3.834 1.616 8
4.246 -3.451 1.454 8
5.232 -3.019 -0.595 7
5.294 -2.489 -1.738 10
4.764 -1.87 -1.875 9
4.131 -1.451 -1.126 8
3.374 -1.538 0.17 8
2.373 -1.908 1.574 9
2.136 -1.718 1.417 8
1.841 -2.19 2.452 9
2.676 -2.511 3.361 8
2.636 -2.399 4.0 8
0.297 -1.927 3.259 9
-3.295 -1.557 1.089 8
-2.965 -1.401 0.98 7
-5.7 -1.47 -1.364 10
-6.368 -1.998 -3.23 8
-5.731 -2.758 -4.569 9
-4.452 -3.508 -5.32 8
-2.311 -4.008 -5.223 9
0.416 -4.128 -4.052 8
2.548 -4.134 -2.618 8
2.293 -3.721 -2.356 9
2.637 -3.51 -1.863 8
1.601 -2.999 -2.276 9
0.878 -2.549 -2.567 8
1.141 -2.3 -2.259 7
1.834 -2.223 -1.453 10
1.651 -2.001 -1.308 8
2.122 -2.009 -0.035 8
2.241 -1.974 1.519 9
1.995 -1.816 2.769 8
1.175 -1.505 3.46 9
-0.431 -1.026 3.46 8
-2.536 -0.393 2.567 8
-2.282 -0.354 2.31 9
-3.89 0.212 1.023 8
-4.397 0.52 0.243 9
-4.155 0.719 0.195 6
-3.626 0.926 0.305 10
-3.084 1.166 0.399 9
-2.702 1.412 0.58 8
-2.431 1.271 0.522 9
-2.344 1.294 0.588 8
-2.436 0.937 0.429 8
-2.562 0.417 0.172 9
-2.805 0.009 -0.182 8
-3.01 -0.083 -0.587 9
-2.815 0.153 -0.833 8
-2.533 0.138 -0.75 8
-2.085 0.525 -0.666 7
-1.641 0.846 -0.335 10
-1.374 0.967 -0.012 9
-1.348 0.851 0.112 8
-1.719 0.659 -0.145 8
-2.57 0.647 -0.492 9
-2.313 0.582 -0.443 8
-3.032 0.632 -0.127 8
-3.063 0.55 1.057 9
-2.529 0.498 2.658 8
-1.658 0.766 3.828 9
-0.819 1.229 3.645 8
-0.737 1.106 3.28 7
-0.186 1.642 1.764 10
0.185 2.071 -0.285 8
0.695 2.047 -1.954 9
1.269 1.801 -2.862 8
1.309 1.475 -3.245 8
0.649 1.005 -3.359 9
-0.313 0.397 -2.935 8
-0.282 0.357 -2.642 9
-1.427 -0.454 -1.346 8
-1.438 -0.086 -1.828 8
1.25 2.083 -1.084 9
3.87 3.622 6.451 6
5.312 3.944 14.718 11
4.781 3.55 13.246 8
4.727 1.895 14.991 8
1.629 -0.381 10.765 9
-2.318 -1.308 3.856 8
-4.988 -2.238 -2.647 9
-6.193 -2.7 -6.859 8
-6.531 -2.264 -8.664 8
-5.878 -2.038 -7.798 9
-5.27 -1.419 -6.867 8
-3.502 -1.314 -3.802 8
-1.471 -1.504 -0.349 7
-0.178 -1.613 2.221 10
0.185 -1.495 3.448 9
-0.232 -1.014 3.291 8
-0.209 -0.913 2.961 8
-0.98 -0.347 1.762 9
-1.638 0.157 0.245 8
-1.656 0.571 -1.143 9
-0.563 0.569 -2.13 8
0.976 0.233 -2.447 8
1.906 -0.261 -2.321 9
1.715 -0.235 -2.088 8
1.629 -0.8 -1.641 7
0.694 -1.285 -0.888 10
-0.425 -1.589 -0.12 8
-1.269 -1.456 0.63 9
-1.757 -0.903 1.272 8
-1.849 -0.243 1.424 8
-1.664 -0.218 1.282 9
-1.192 0.189 0.954 8
-0.16 0.358 0.335 9
0.933 0.385 -0.441 8
1.653 0.371 -1.211 8
2.017 0.264 -1.687 9
1.816 0.237 -1.518 7
1.671 0.003 -1.548 10
0.953 -0.021 -1.149 8
0.342 -0.102 -0.556 8
-0.026 -0.259 -0.052 9
-0.192 -0.294 0.264 8
-0.016 -0.426 0.472 9
0.058 -0.463 0.714 8
0.052 -0.417 0.642 8
-0.218 -0.355 0.705 9
-0.56 -0.369 0.491 8
-0.771 -0.338 0.159 9
-0.829 -0.138 -0.245 6
-0.783 0.177 -0.444 10
-0.635 0.366 -0.391 9
-0.572 0.33 -0.351 8
-0.462 0.224 -0.415 9
-0.458 0.066 -0.402 8
-0.131 0.071 -0.075 8
0.472 -0.034 0.35 9
0.698 -0.179 0.583 8
0.629 -0.161 0.525 9
0.472 -0.127 0.424 8
0.306 0.018 0.232 8
0.175 0.234 0.082 7
0.078 0.381 -0.419 10
0.11 0.446 -1.11 8
0.168 0.458 -1.412 9
0.151 0.412 -1.271 8
0.14 0.376 -1.27 9
0.088 0.251 -0.963 8
-0.043 0.088 -0.281 8
-0.197 -0.062 0.362 9
-0.334 -0.211 0.796 8
-0.51 -0.266 1.129 9
-0.459 -0.24 1.016 8
-0.531 -0.305 1.088 7
-0.521 -0.386 0.97 10
-0.691 -0.313 0.761 8
-0.923 -0.199 0.271 9
-1.037 -0.166 -0.127 8
-1.061 -0.141 -0.1 8
-0.955 -0.127 -0.09 9
-1.023 0.083 0.952 8
-1.225 0.741 1.444 9
-1.16 1.119 0.427 8
-0.65 0.777 -0.25 8
-0.197 0.477 -0.309 9
-0.177 0.429 -0.278 6
-0.037 0.506 -0.217 10
0.029 0.685 -0.314 9
0.132 0.743 -0.544 8
0.282 0.716 -0.864 9
0.457 0.636 -1.225 8
0.536 0.536 -1.408 8
0.483 0.393 -1.301 9
0.434 0.353 -1.171 8
0.244 0.118 -0.791 9
-0.051 -0.103 -0.215 8
-0.259 -0.185 0.305 8
-0.209 -0.21 0.568 7
0.01 -0.303 0.538 10
0.242 -0.397 0.458 9
0.218 -0.357 0.412 8
0.272 -0.319 0.439 8
0.137 -0.218 0.46 9
-0.059 -0.18 0.493 8
-0.265 -0.197 0.511 9
-0.366 -0.172 0.441 8
-0.278 -0.116 0.386 8
-0.25 -0.104 0.348 9
-0.068 -0.127 0.411 8
0.084 -0.263 0.517 7
0.171 -0.467 0.587 10
0.164 -0.631 0.583 8
0.093 -0.666 0.471 9
0.084 -0.6 0.424 8
0.016 -0.504 0.249 8
-0.054 -0.371 0.042 9
-0.111 -0.248 -0.138 8
-0.088 -0.08 -0.168 9
-0.027 0.025 -0.103 8
0.006 -0.073 -0.043 8
0.005 -0.065 -0.039 9
-0.026 -0.232 0.0 7
-0.093 -0.312 -0.008 10
-0.166 -0.286 -0.03 8
-0.12 -0.17 -0.083 8
0.069 0.023 -0.176 9
0.211 0.221 -0.309 8
0.19 0.199 -0.278 9
0.23 0.226 -0.348 8
0.144 0.096 -0.216 8
-0.125 0.034 0.069 9
-0.39 -0.027 0.317 8
-0.498 -0.122 0.317 9
-0.448 -0.11 0.286 6
-0.429 -0.093 0.13 10
-0.301 0.009 -0.096 9
-0.143 0.148 -0.413 8
0.016 0.27 -0.697 9
0.116 0.371 -0.83 8
0.113 0.405 -0.775 8
0.032 0.338 -0.52 9
0.028 0.304 -0.468 8
-0.105 0.216 -0.117 8
-0.148 0.038 0.122 9
-0.068 -0.165 0.253 8
-0.034 -0.199 0.339 7
-0.062 -0.097 0.278 10
-0.039 0.043 0.082 8
-0.035 0.039 0.074 9
0.02 0.188 -0.196 8
0.012 0.342 -0.417 9
-0.077 0.441 -0.488 8
-0.177 0.401 -0.467 8
-0.198 0.295 -0.434 9
-0.091 0.218 -0.434 8
-0.082 0.196 -0.39 9
0.04 0.138 -0.402 8
0.083 0.09 -0.362 7
0.052 0.049 -0.252 10
-0.043 0.01 -0.063 8
-0.133 -0.029 0.189 9
-0.116 -0.105 0.395 8
-0.104 -0.094 0.356 8
0.0 -0.239 0.532 9
0.024 -0.374 0.738 8
-0.08 -0.413 0.856 9
-0.178 -0.395 0.765 8
-0.2 -0.306 0.507 8
-0.139 -0.124 0.245 9
-0.125 -0.112 0.221 6
0.063 0.05 0.073 10
0.305 0.115 0.059 9
0.425 0.094 0.121 8
0.399 -0.019 0.261 9
0.318 -0.184 0.505 8
0.287 -0.165 0.454 8
0.13 -0.31 0.668 9
-0.123 -0.331 0.59 8
-0.322 -0.245 0.243 9
-0.456 -0.079 -0.196 8
-0.507 0.106 -0.604 8
-0.456 0.096 -0.544 7
-0.379 0.167 -0.735 10
-0.16 0.182 -0.657 9
0.121 0.19 -0.377 8
0.291 0.169 -0.093 8
0.335 0.137 0.079 9
0.26 0.117 0.204 8
0.165 0.112 0.291 9
0.148 0.101 0.262 8
0.08 0.1 0.261 8
-0.057 0.098 0.261 9
-0.224 0.089 0.29 8
-0.325 0.053 0.327 7
-0.312 0.001 0.242 10
-0.197 -0.016 -0.067 8
-0.177 -0.014 -0.061 9
-0.104 0.026 -0.451 8
-0.122 0.114 -0.786 8
-0.204 0.29 -0.884 9
-0.293 0.446 -0.668 8
-0.331 0.426 -0.199 9
-0.317 0.27 0.252 8
-0.286 0.243 0.227 8
-0.21 0.066 0.497 9
-0.053 -0.066 0.53 7
0.152 -0.126 0.359 10
0.187 -0.056 0.147 8
0.051 0.157 -0.108 8
-0.093 0.444 -0.367 9
-0.084 0.399 -0.331 8
-0.184 0.595 -0.427 9
-0.163 0.612 -0.36 8
-0.077 0.542 -0.366 8
0.13 0.382 -0.253 9
0.351 0.122 0.02 8
0.279 0.12 0.146 9
0.251 0.108 0.132 6
0.016 0.282 0.097 10
-0.176 0.353 -0.08 9
-0.29 0.369 -0.183 8
-0.376 0.336 -0.259 8
-0.482 0.307 -0.394 9
-0.434 0.258 -0.414 8
-0.467 0.232 -0.372 9
-0.31 0.111 -0.269 8
-0.024 0.02 -0.109 8
0.227 0.057 -0.012 9
0.289 0.188 -0.046 8
0.26 0.169 -0.041 7
0.096 0.295 -0.04 10
-0.303 0.341 0.046 8
-0.769 0.295 0.078 9
-1.026 0.05 0.064 8
-1.016 -0.284 0.15 9
-0.964 -0.248 0.33 8
-0.769 -0.031 0.528 8
-0.692 -0.028 0.475 9
-0.272 0.016 0.677 8
0.197 -0.016 0.774 8
0.655 -0.155 0.696 9
0.853 -0.304 0.448 7
0.639 -0.181 0.153 10
0.205 0.198 -0.12 8
0.184 0.178 -0.108 8
-0.213 0.682 -0.26 9
-0.521 0.993 -0.307 8
-0.425 0.936 -0.223 9
# end
#Thu Feb 26 20:29:24 GMT+08:00 2015:
