# Supplementary material for: Abnormal Gait Behavior Detection for Elderly Based on Enhanced Wigner-Ville Analysis and Cloud Incremental SVM Learning
Source: Hindawi journal article supplement (doi:10.1155/2016/5869238), 2016-01-01
Supplement: f1 [file 5869238.f1.zip › Supplementary Materials/Original Data/Forward fall Ending lying flat/original__63.txt]

# Accelerometer Values
# filename:  original__63.txt
# Saving start time: Thu Feb 26 20:29:34 GMT+08:00 2015

# sensor resolution: 0.0095825195m/s^2
#Sensorvendor: KIONIX, name: KX023 Accelerometer, type: 1,version : 1, range 39.240005

# X value, Y value, Z value, time diff in ms
0.201 0.111 0.008 8
0.2 0.135 -0.002 9
0.166 0.16 -0.047 8
0.11 0.158 -0.098 9
0.099 0.142 -0.117 8
0.03 0.128 -0.106 7
-0.031 0.011 -0.09 10
-0.05 -0.085 -0.028 8
-0.024 -0.158 0.062 9
0.029 -0.211 0.132 8
0.099 -0.238 0.177 8
0.089 -0.214 0.159 9
0.134 -0.208 0.194 8
0.134 -0.171 0.195 9
0.106 -0.127 0.149 8
0.064 -0.085 0.048 8
0.02 -0.048 -0.07 9
0.018 -0.043 -0.063 6
-0.005 -0.047 -0.145 10
-0.012 -0.069 -0.179 9
-0.025 -0.083 -0.163 8
-0.044 -0.09 -0.097 9
-0.055 -0.075 -0.013 8
-0.045 -0.048 0.056 8
-0.007 -0.028 0.107 9
-0.006 -0.025 0.096 8
0.037 -0.018 0.113 9
0.063 -0.017 0.076 8
0.05 0.001 -0.019 8
0.002 0.035 -0.129 7
-0.044 0.066 -0.194 10
-0.054 0.105 -0.187 9
-0.049 0.094 -0.168 8
-0.029 0.107 -0.104 8
-0.016 0.071 -0.006 9
-0.026 0.046 0.085 8
-0.035 0.046 0.129 9
-0.031 0.042 0.104 8
-0.023 0.037 0.032 8
-0.021 0.033 0.029 9
-0.024 0.043 -0.059 8
-0.031 0.065 -0.145 7
-0.041 0.08 -0.194 10
-0.047 0.077 -0.208 8
-0.038 0.048 -0.189 9
-0.034 0.044 -0.17 8
-0.016 -0.011 -0.127 8
0.005 -0.064 -0.078 9
0.007 -0.1 -0.006 8
-0.028 -0.116 0.058 9
-0.079 -0.112 0.095 8
-0.109 -0.091 0.093 8
-0.098 -0.082 0.084 9
-0.081 -0.03 0.044 7
-0.045 0.021 -0.009 10
-0.044 0.06 -0.049 8
-0.081 0.076 -0.05 8
-0.133 0.062 -0.025 9
-0.163 0.047 0.007 8
-0.147 0.042 0.006 9
-0.134 0.036 0.033 8
-0.096 0.029 0.041 8
-0.04 0.036 0.049 9
0.036 0.062 0.073 8
0.126 0.074 0.067 9
0.114 0.067 0.06 6
0.173 0.08 -0.007 10
0.155 0.115 -0.094 9
0.076 0.139 -0.183 8
-0.011 0.126 -0.279 8
-0.07 0.092 -0.337 9
-0.089 0.067 -0.292 8
-0.084 0.037 -0.162 9
-0.076 0.034 -0.146 8
-0.063 0.003 0.01 8
-0.041 -0.012 0.142 9
-0.017 -0.024 0.211 8
0.012 -0.039 0.191 7
0.037 -0.025 0.113 10
0.033 -0.023 0.024 8
0.05 -0.02 0.022 9
0.062 0.076 -0.082 8
0.062 0.111 -0.189 9
0.036 0.104 -0.306 8
0.04 0.081 -0.341 8
0.079 0.043 -0.307 9
0.071 0.038 -0.276 8
0.09 -0.029 -0.255 9
0.084 -0.112 -0.216 8
0.066 -0.184 -0.118 7
0.073 -0.22 0.022 10
0.122 -0.218 0.141 8
0.169 -0.21 0.229 9
0.152 -0.189 0.206 8
0.154 -0.186 0.267 8
0.067 -0.187 0.31 9
-0.048 -0.159 0.347 8
-0.088 0.154 0.523 8
-0.105 0.423 0.415 9
-0.119 0.138 -0.116 8
-0.107 0.124 -0.104 9
0.119 -0.368 -0.466 6
0.436 -0.55 -0.55 10
0.6 -0.409 -0.384 9
0.599 -0.232 -0.117 8
0.423 -0.092 -0.002 9
0.175 -0.015 -0.101 8
0.157 -0.014 -0.091 8
-0.17 -0.08 -0.299 9
-0.532 -0.298 -0.431 8
-0.768 -0.592 -0.34 9
-0.746 -0.813 -0.117 8
-0.416 -0.886 -0.026 8
-0.374 -0.798 -0.024 7
0.118 -0.79 -0.126 10
0.553 -0.674 -0.123 9
0.765 -0.483 0.129 8
0.733 -0.382 0.462 8
0.596 -0.355 0.779 9
0.51 -0.377 0.847 8
0.486 -0.448 0.468 9
0.438 -0.403 0.421 8
0.454 -0.443 -0.291 8
0.563 -0.422 -1.004 9
0.85 -0.264 -1.393 8
1.205 0.106 -1.458 7
1.37 0.486 -1.275 10
1.233 0.438 -1.147 8
1.034 0.569 -0.874 9
0.535 0.423 -0.597 8
-0.057 0.15 -0.368 8
-0.529 -0.123 -0.003 9
-0.667 -0.341 0.678 8
-0.465 -0.492 1.257 9
-0.419 -0.443 1.132 8
0.014 -0.463 1.293 8
0.501 -0.366 1.187 9
0.677 -0.279 1.017 6
0.492 -0.254 0.846 11
0.314 -0.243 0.585 8
0.268 -0.313 0.39 8
0.241 -0.282 0.351 9
0.32 -0.466 0.44 8
0.317 -0.616 0.606 8
0.217 -0.662 0.859 9
0.24 -0.596 1.254 8
0.351 -0.581 1.501 9
0.455 -0.65 1.46 8
0.409 -0.585 1.314 8
0.42 -0.605 1.022 7
0.381 -0.569 0.469 10
0.453 -0.491 -0.169 9
0.618 -0.27 -0.887 8
0.876 -0.022 -1.609 8
1.045 0.105 -1.913 9
0.94 0.095 -1.722 8
0.799 0.138 -1.505 9
0.422 0.057 -0.999 8
-0.024 -0.14 -0.296 8
-0.432 -0.321 0.431 9
-0.767 -0.456 0.875 8
-0.69 -0.41 0.787 7
-0.914 -0.428 0.836 10
-0.947 -0.344 0.248 8
-0.745 -0.318 -0.776 9
-0.308 -0.373 -1.686 8
0.22 -0.614 -2.261 9
0.567 -0.973 -2.441 8
0.511 -0.875 -2.197 8
0.432 -1.097 -1.824 9
0.145 -1.107 -1.24 8
-0.181 -0.989 -0.411 8
-0.422 -1.001 0.681 9
-0.445 -1.1 1.445 7
-0.471 -1.101 1.638 10
-0.423 -0.991 1.474 8
-0.455 -0.92 1.028 8
-0.404 -0.739 0.189 9
-0.314 -0.481 -0.65 8
-0.216 -0.252 -1.313 9
-0.051 -0.103 -1.885 8
-0.004 -0.002 -2.39 8
-0.003 -0.002 -2.151 9
-0.182 0.175 -2.474 8
-0.41 0.444 -2.737 9
-0.507 0.535 -3.243 6
-0.497 0.422 -3.827 10
-0.477 0.169 -4.178 9
-0.406 -0.181 -4.124 8
-0.366 -0.162 -3.712 9
-0.054 -0.589 -3.19 8
0.526 -1.074 -2.155 8
1.128 -1.495 -0.872 9
1.54 -1.751 0.373 8
1.572 -1.792 1.301 9
1.304 -1.655 1.683 8
1.174 -1.49 1.515 8
0.951 -1.255 1.197 7
0.992 -0.923 0.432 10
1.282 -0.542 -0.335 8
1.842 -0.185 -1.063 9
2.793 0.145 -1.653 8
2.514 0.13 -1.488 9
3.536 0.414 -1.661 8
4.167 0.669 -1.32 8
4.223 0.955 -0.674 9
3.717 1.191 0.004 8
3.113 1.29 0.338 9
2.919 1.272 0.293 8
2.627 1.144 0.264 7
2.987 1.041 -0.058 10
3.936 0.862 -0.568 8
5.457 0.56 -1.024 9
6.948 0.193 -1.081 8
7.573 -0.058 -0.454 8
6.948 -0.127 0.509 9
6.254 -0.114 0.458 8
4.921 0.147 1.089 9
3.762 0.548 0.97 8
3.277 0.859 0.281 8
3.489 1.05 -0.357 9
4.473 0.989 -0.473 6
5.909 0.691 -0.033 11
5.318 0.622 -0.03 8
6.082 0.452 0.806 8
5.412 0.561 1.867 9
3.666 0.814 2.911 8
1.562 1.106 3.565 8
-0.277 1.391 3.411 9
-1.544 1.654 2.08 8
-1.39 1.488 1.872 9
-2.312 1.646 -0.272 8
-2.676 1.692 -2.064 8
-2.531 1.718 -2.783 7
-2.845 1.955 -2.413 10
-3.78 2.299 -1.067 9
-3.402 2.069 -0.96 8
-4.287 2.342 0.708 8
-4.082 2.347 1.855 9
-2.396 1.984 2.256 8
-0.513 1.548 2.087 9
0.157 1.111 1.502 8
-0.295 0.517 0.819 8
-0.265 0.466 0.737 9
-1.395 -0.252 0.549 8
-2.752 -0.972 1.123 7
-3.518 -1.692 2.021 10
-3.157 -2.369 2.573 8
-1.906 -2.968 2.512 9
-0.399 -3.523 2.22 8
-0.359 -3.171 1.998 8
1.221 -3.703 2.261 9
1.863 -4.026 2.804 8
0.987 -3.83 2.883 9
0.142 -3.367 2.657 8
0.234 -3.018 2.324 8
0.406 -2.843 1.83 9
0.365 -2.559 1.647 7
-0.183 -2.731 1.163 10
-1.108 -2.983 0.944 8
-1.487 -3.194 1.194 8
-1.245 -3.194 1.703 9
-1.021 -2.715 1.995 8
-0.871 -1.968 1.651 9
-0.784 -1.772 1.486 8
-0.332 -1.265 0.427 8
0.082 -1.184 -0.983 9
0.057 -1.27 -2.244 8
-0.043 -1.393 -2.772 9
-0.039 -1.253 -2.495 6
-0.444 -1.352 -2.212 10
-1.248 -1.364 -1.403 9
-1.893 -1.341 -0.317 8
-1.889 -1.368 0.704 9
-1.27 -1.352 1.469 8
-0.646 -1.196 1.787 8
-0.335 -0.937 1.548 9
-0.302 -0.843 1.393 8
-0.504 -0.398 0.917 8
-1.187 0.141 0.592 9
-1.688 0.589 0.326 8
-1.574 0.894 0.022 7
-1.034 1.054 -0.213 10
-0.376 1.089 -0.6 8
-0.338 0.98 -0.54 9
0.173 0.812 -1.126 8
0.329 0.462 -1.641 9
0.166 0.169 -1.781 8
-0.099 0.046 -1.388 8
-0.319 0.195 -0.653 9
-0.5 0.567 -0.051 8
-0.45 0.51 -0.046 9
-0.641 0.864 0.1 8
-0.915 1.044 -0.012 7
-1.385 1.043 -0.108 10
-2.0 0.97 -0.231 8
-2.426 0.86 -0.495 9
-2.436 0.816 -0.928 8
-2.192 0.734 -0.835 8
-1.94 0.909 -1.306 9
-1.587 1.187 -1.504 8
-1.384 1.435 -1.239 9
-1.514 1.607 -0.419 8
-1.813 1.566 0.838 8
-2.111 1.443 2.323 9
-1.9 1.298 2.09 6
-2.215 1.339 3.379 11
-2.326 1.383 3.792 8
-2.239 1.522 3.219 8
-2.146 1.883 2.282 9
-1.993 2.274 1.593 8
-1.922 2.566 1.222 8
-1.73 2.309 1.1 9
-2.096 2.404 0.66 8
-2.6 2.192 -0.362 9
-2.591 1.554 -1.775 8
-1.901 0.417 -2.823 8
-1.711 0.375 -2.541 7
-0.625 -0.949 -1.107 10
0.228 -0.854 -0.996 9
0.556 -2.794 0.654 8
0.402 -3.175 1.883 8
0.048 -3.217 2.321 9
-0.126 -2.666 1.807 8
-0.218 -1.829 0.463 9
-0.196 -1.646 0.417 8
-0.18 -0.968 -1.227 8
-0.069 -0.47 -1.875 9
-0.211 0.008 -0.887 8
-1.701 1.67 1.744 7
-1.542 1.16 5.075 10
2.003 -1.673 7.241 8
1.803 -1.506 6.517 9
5.137 -2.997 6.799 8
6.278 -5.03 4.369 8
4.778 -6.518 -0.363 9
0.633 -3.499 -3.249 8
-3.912 0.958 -4.271 9
-6.726 3.048 -6.002 8
-6.054 2.743 -5.401 8
-7.161 3.719 -6.094 9
-6.316 3.165 -4.878 7
-4.145 1.356 -2.572 10
-1.874 -0.143 -0.234 8
-0.261 -0.976 1.218 8
0.59 -1.497 1.877 9
0.531 -1.347 1.689 8
0.875 -1.627 2.077 9
1.272 -1.982 2.456 8
1.825 -2.628 2.868 8
1.902 -2.84 3.021 9
1.264 -1.836 3.18 8
0.206 -0.07 3.42 9
0.186 -0.063 3.078 6
-0.608 1.279 2.579 10
-0.217 1.504 1.4 9
1.355 0.822 -0.115 8
3.206 0.109 -1.768 8
4.227 -0.283 -3.167 9
3.817 -0.397 -3.891 8
3.435 -0.357 -3.502 9
1.759 0.009 -3.138 8
-0.616 0.431 -2.365 8
-2.638 0.389 -1.893 9
-3.629 0.084 -1.548 8
-3.266 0.075 -1.393 7
-1.812 -0.798 -0.589 10
-1.63 -0.718 -0.53 8
0.293 -0.823 0.172 9
1.499 -0.561 1.058 8
1.424 -0.157 2.166 9
0.176 0.145 2.662 8
-1.187 0.14 2.253 8
-1.068 0.126 2.027 9
-1.685 0.01 1.559 8
-1.496 -0.124 0.963 9
-0.826 -0.165 -0.002 8
-0.3 0.022 -0.799 7
-0.024 -0.109 -1.233 10
0.129 -0.476 -1.24 8
0.116 -0.428 -1.116 9
-0.045 -0.426 -0.804 8
-0.471 -0.096 -0.34 8
-1.136 0.138 0.138 9
-2.036 0.178 0.291 8
-2.408 -0.086 0.417 8
-2.09 -0.561 0.766 9
-1.881 -0.505 0.689 8
-1.449 -0.854 1.027 9
-0.577 -0.99 1.224 6
0.462 -0.559 0.674 10
0.933 0.393 -0.611 9
0.738 1.252 -1.554 8
0.172 1.609 -1.838 9
0.155 1.448 -1.654 8
-0.36 1.436 -1.434 8
-0.401 1.047 -0.649 9
-0.113 0.35 0.341 8
0.136 -0.254 0.992 9
0.304 -0.623 1.013 8
0.346 -0.633 0.339 8
0.312 -0.57 0.305 7
0.176 -0.12 -0.652 10
-0.093 0.483 -1.187 9
-0.356 0.715 -1.027 8
-0.673 0.341 -0.416 8
-0.699 -0.2 0.349 9
-0.378 -0.3 0.971 8
-0.34 -0.27 0.874 8
-0.018 -0.196 1.109 9
0.407 -0.198 0.93 8
0.759 -0.04 0.473 9
0.668 0.244 -0.096 8
0.601 0.22 -0.087 7
-0.28 0.017 -0.792 10
-0.252 0.015 -0.713 8
-0.42 -0.185 -0.082 9
-0.521 -0.221 0.688 8
-0.515 -0.32 0.995 8
-0.472 -0.301 1.035 9
-0.522 -0.08 0.99 8
-0.606 0.076 0.64 9
-0.546 0.068 0.576 8
-0.492 0.092 -0.148 8
-0.407 0.183 -0.835 9
-0.508 0.32 -1.071 6
-0.67 0.313 -0.885 11
-0.753 0.154 -0.477 8
-0.677 0.138 -0.43 8
-0.616 -0.07 0.057 9
-0.378 -0.235 0.459 8
-0.085 -0.274 0.633 9
0.127 -0.122 0.503 8
0.242 0.116 0.246 8
0.277 0.343 0.091 9
0.249 0.309 0.082 8
0.245 0.429 0.019 8
0.246 0.336 -0.003 7
0.241 0.107 -0.013 10
0.247 -0.133 -0.023 9
0.268 -0.267 -0.014 8
0.277 -0.272 0.017 8
0.249 -0.245 0.015 9
0.269 -0.142 0.017 8
0.268 -0.005 -0.131 9
0.143 0.185 -0.203 8
-0.025 0.346 -0.127 8
-0.116 0.259 -0.201 9
-0.157 0.084 -0.305 8
-0.141 0.075 -0.274 7
-0.126 0.018 -0.258 10
-0.027 0.052 -0.249 8
0.142 0.142 -0.262 9
0.273 0.219 -0.184 8
0.269 0.221 -0.061 9
0.169 0.218 0.038 8
0.152 0.196 0.034 8
0.055 0.221 0.059 9
0.04 0.176 -0.08 8
0.087 0.075 -0.298 8
0.096 -0.067 -0.409 9
0.0 -0.261 -0.253 7
-0.179 -0.372 0.172 10
-0.161 -0.334 0.155 8
-0.369 -0.308 0.636 8
-0.424 -0.279 0.941 9
-0.305 -0.285 1.028 8
-0.162 -0.235 0.975 9
-0.044 -0.228 0.715 8
0.027 -0.261 0.312 8
0.024 -0.235 0.281 9
0.029 -0.174 -0.012 8
0.013 -0.043 -0.177 9
0.002 0.133 -0.366 6
0.009 0.252 -0.595 10
0.049 0.23 -0.748 9
0.044 0.207 -0.772 8
0.068 0.186 -0.695 9
0.052 0.221 -0.581 8
0.004 0.108 -0.355 8
-0.075 0.033 -0.172 9
-0.172 0.094 -0.136 8
-0.201 0.198 -0.183 9
-0.181 0.178 -0.164 8
-0.095 0.202 -0.173 8
-0.002 0.098 -0.135 7
0.019 -0.003 -0.025 10
0.007 -0.082 0.115 8
-0.035 -0.158 0.183 9
-0.117 -0.179 0.185 8
-0.105 -0.161 0.167 9
-0.199 -0.138 0.152 8
-0.24 -0.163 0.142 8
-0.19 -0.238 0.081 9
-0.081 -0.31 0.031 8
0.029 -0.338 0.061 9
0.117 -0.326 0.101 8
0.106 -0.293 0.091 7
0.154 -0.276 0.163 10
0.141 -0.241 0.284 8
0.096 -0.205 0.336 9
0.07 -0.163 0.289 8
0.102 -0.105 0.193 8
0.186 -0.065 0.055 9
0.167 -0.058 0.05 8
0.336 -0.067 -0.062 9
0.426 -0.055 -0.055 8
0.303 -0.036 0.029 8
0.069 -0.065 0.095 9
-0.183 -0.095 0.09 6
-0.356 -0.111 -0.039 11
-0.321 -0.099 -0.035 8
-0.31 -0.069 -0.202 8
-0.172 0.038 -0.353 9
-0.056 0.193 -0.488 8
-0.018 0.274 -0.5 8
-0.095 0.224 -0.379 9
-0.253 0.099 -0.231 8
-0.228 0.089 -0.208 9
-0.413 -0.055 -0.073 8
-0.573 -0.188 0.051 8
-0.653 -0.255 0.124 7
-0.65 -0.216 0.124 10
-0.537 -0.134 0.077 9
-0.336 -0.053 0.067 8
-0.302 -0.047 0.06 8
-0.087 0.003 0.11 9
0.046 0.003 0.157 8
0.054 -0.006 0.177 9
0.025 -0.013 0.168 8
0.025 0.001 0.149 8
0.022 0.001 0.134 9
0.097 0.041 0.113 8
0.202 0.126 0.086 7
0.271 0.208 0.059 10
0.302 0.217 0.052 8
0.289 0.175 0.08 9
0.26 0.128 0.105 8
0.234 0.115 0.095 8
0.183 0.057 0.109 9
0.077 0.075 0.099 8
-0.005 0.165 0.018 9
0.012 0.223 -0.136 8
0.08 0.263 -0.288 8
0.104 0.249 -0.365 9
0.093 0.224 -0.328 7
0.021 0.164 -0.284 10
-0.132 0.126 -0.123 8
-0.258 0.108 0.034 8
-0.28 0.098 0.119 9
-0.211 0.082 0.126 8
-0.083 0.083 -0.004 9
-0.075 0.075 -0.003 8
0.055 0.1 -0.257 8
0.071 0.112 -0.449 9
-0.064 0.136 -0.427 8
-0.271 0.125 -0.245 9
-0.443 0.033 -0.013 6
-0.514 -0.075 0.196 10
-0.463 -0.067 0.176 9
-0.464 -0.134 0.314 8
-0.38 -0.185 0.33 9
-0.207 -0.206 0.259 8
-0.034 -0.167 0.195 8
0.075 -0.076 0.148 9
0.123 0.019 0.13 8
0.111 0.017 0.117 9
0.128 0.044 0.125 8
0.113 0.035 0.155 8
0.0 0.117 0.15 7
-0.049 0.171 0.092 10
0.031 0.155 -0.051 8
0.076 0.19 -0.242 9
0.069 0.171 -0.218 8
0.135 0.184 -0.339 9
0.188 0.261 -0.33 8
0.205 0.352 -0.149 8
0.193 0.333 0.032 9
0.077 0.277 0.106 8
0.069 0.127 0.148 9
0.062 0.114 0.133 8
-0.205 0.023 0.13 7
-0.335 0.071 0.076 10
-0.277 0.104 0.009 8
-0.09 0.151 -0.067 9
0.017 0.22 -0.168 8
0.016 0.198 -0.151 8
-0.017 0.206 -0.282 9
0.285 -0.107 -0.393 8
0.516 -0.34 -0.467 9
0.151 -0.074 -0.281 8
-0.317 0.277 0.213 8
-0.595 0.466 0.546 9
-0.536 0.419 0.491 6
-0.47 0.28 0.516 10
-0.223 -0.031 0.39 9
-0.046 -0.256 0.186 8
-0.066 -0.356 -0.074 9
-0.218 -0.31 -0.224 8
-0.513 -0.32 -0.202 8
-0.462 -0.288 -0.182 9
-0.876 -0.288 -0.103 8
-1.231 -0.1 0.005 9
-1.247 -0.079 0.075 8
-0.92 -0.254 0.039 8
-0.672 -0.278 -0.01 7
-0.561 -0.221 0.011 10
-0.505 -0.199 0.01 9
-0.466 -0.152 0.057 8
-0.427 -0.028 0.059 8
-0.275 0.118 -0.037 9
-0.002 0.218 -0.165 8
0.284 0.286 -0.209 9
0.522 0.311 -0.175 8
0.469 0.28 -0.157 8
0.594 0.277 -0.05 9
0.563 0.277 0.086 8
0.453 0.252 0.198 7
0.315 0.186 0.244 10
0.211 0.131 0.206 8
0.148 0.119 0.126 9
0.133 0.107 0.114 8
0.11 0.046 -0.068 8
0.109 -0.085 -0.355 9
0.094 -0.205 -0.544 8
-0.027 -0.205 -0.563 9
# end
#Thu Feb 26 20:29:39 GMT+08:00 2015�
