# Supplementary material for: Abnormal Gait Behavior Detection for Elderly Based on Enhanced Wigner-Ville Analysis and Cloud Incremental SVM Learning
Source: Hindawi journal article supplement (doi:10.1155/2016/5869238), 2016-01-01
Supplement: f1 [file 5869238.f1.zip › Supplementary Materials/Original Data/Forward fall Ending lying flat/original__64.txt]

# Accelerometer Values
# filename:  original__64.txt
# Saving start time: Thu Feb 26 20:29:42 GMT+08:00 2015

# sensor resolution: 0.0095825195m/s^2
#Sensorvendor: KIONIX, name: KX023 Accelerometer, type: 1,version : 1, range 39.240005

# X value, Y value, Z value, time diff in ms
-0.215 -0.123 0.213 8
-0.194 -0.111 0.192 8
-0.217 -0.148 0.096 7
-0.221 -0.175 -0.04 10
-0.2 -0.203 -0.158 9
-0.085 -0.214 -0.206 8
0.111 -0.2 -0.178 8
0.249 -0.216 -0.105 9
0.224 -0.194 -0.095 8
0.214 -0.204 0.021 9
0.067 -0.162 0.169 8
-0.07 -0.123 0.27 8
-0.126 -0.109 0.255 9
-0.14 -0.112 0.154 8
-0.126 -0.101 0.138 7
-0.121 -0.103 0.007 10
-0.05 -0.085 -0.12 8
0.058 -0.048 -0.216 9
0.139 0.003 -0.276 8
0.167 0.074 -0.299 8
0.158 0.169 -0.28 9
0.142 0.152 -0.252 8
0.14 0.224 -0.221 9
0.174 0.263 -0.195 8
0.218 0.29 -0.166 8
0.236 0.27 -0.144 9
0.214 0.207 -0.116 7
0.169 0.141 -0.074 10
0.152 0.127 -0.067 8
0.144 0.055 -0.02 8
0.183 -0.001 0.02 9
0.21 -0.032 0.039 8
0.181 -0.02 0.082 9
0.134 0.031 0.154 8
0.127 0.083 0.198 8
0.114 0.075 0.178 9
0.143 0.098 0.165 8
0.174 0.105 0.102 9
0.21 0.122 0.043 6
0.244 0.107 0.015 10
0.242 0.035 -0.001 9
0.183 -0.033 0.011 8
0.165 -0.029 0.01 9
0.054 -0.028 0.045 8
-0.063 0.031 0.049 8
-0.121 0.08 0.007 9
-0.109 0.089 -0.046 8
-0.056 0.079 -0.076 9
0.004 0.08 -0.074 8
0.003 0.072 -0.066 8
0.069 0.087 -0.021 7
0.147 0.084 0.059 10
0.218 0.072 0.138 8
0.247 0.071 0.177 9
0.22 0.093 0.157 8
0.167 0.127 0.09 9
0.15 0.114 0.081 8
0.106 0.125 -0.004 8
0.081 0.114 -0.082 9
0.058 0.108 -0.137 8
0.044 0.123 -0.165 9
0.076 0.135 -0.173 8
0.068 0.122 -0.156 7
0.124 0.103 -0.156 10
0.149 0.075 -0.145 8
0.142 0.069 -0.131 9
0.112 0.066 -0.117 8
0.074 0.04 -0.101 8
0.033 0.009 -0.095 9
0.03 0.008 -0.101 8
-0.018 0.007 -0.091 9
-0.075 0.021 -0.111 8
-0.12 0.047 -0.138 8
-0.126 0.067 -0.164 9
-0.087 0.066 -0.189 6
-0.02 0.062 -0.198 11
-0.018 0.056 -0.178 8
0.054 0.05 -0.161 8
0.117 0.041 -0.116 9
0.139 0.032 -0.036 8
0.136 0.002 0.05 8
0.138 -0.065 0.122 9
0.144 -0.138 0.2 8
0.13 -0.124 0.18 9
0.13 -0.161 0.281 8
0.116 -0.167 0.362 8
0.089 -0.153 0.376 7
0.064 -0.11 0.331 10
0.048 -0.055 0.238 9
0.021 0.003 0.114 8
0.019 0.002 0.102 8
-0.021 0.055 -0.01 9
-0.058 0.079 -0.104 8
-0.07 0.087 -0.18 9
-0.067 0.083 -0.229 8
-0.074 0.069 -0.228 8
-0.087 0.056 -0.176 9
-0.078 0.05 -0.159 8
-0.073 0.034 -0.09 7
-0.033 0.015 -0.036 10
0.018 0.014 -0.011 8
0.045 0.031 -0.008 9
0.036 0.029 -0.02 8
0.01 0.005 -0.042 8
0.009 0.004 -0.038 9
-0.012 -0.031 -0.06 8
-0.029 -0.064 -0.065 9
-0.049 -0.077 -0.053 8
-0.051 -0.076 -0.031 8
-0.018 -0.087 -0.002 9
-0.016 -0.078 -0.002 7
0.034 -0.109 0.03 10
0.072 -0.11 0.051 8
0.087 -0.077 0.047 8
0.099 -0.049 0.024 9
0.104 -0.045 -0.014 8
0.087 -0.06 -0.038 9
0.05 -0.06 -0.025 8
0.045 -0.054 -0.022 8
0.009 -0.057 0.005 9
-0.014 -0.074 0.019 8
-0.029 -0.08 0.012 9
-0.037 -0.081 -0.006 6
-0.024 -0.085 -0.037 10
-0.022 -0.076 -0.059 9
-0.002 -0.069 -0.053 8
0.017 -0.023 -0.063 9
0.038 -0.024 -0.065 8
0.044 -0.025 -0.065 8
0.037 -0.013 -0.066 9
0.031 -0.003 -0.094 8
0.028 -0.002 -0.084 8
0.022 -0.024 -0.142 9
-0.001 -0.044 -0.19 8
-0.052 -0.047 -0.209 7
-0.125 -0.02 -0.193 10
-0.165 0.035 -0.147 8
-0.112 0.049 -0.084 9
-0.1 0.044 -0.075 8
0.019 0.03 -0.025 9
0.137 0.03 0.009 8
0.226 0.073 0.051 8
0.376 0.173 0.183 9
0.463 0.192 0.195 8
0.612 -0.029 0.07 9
0.55 -0.026 0.063 8
0.498 -0.193 0.02 7
0.032 -0.074 -0.042 10
-0.359 0.018 -0.036 8
-0.515 -0.103 0.042 9
-0.423 -0.339 0.054 8
-0.213 -0.533 0.015 8
-0.192 -0.479 0.013 9
0.019 -0.558 0.026 8
0.231 -0.557 0.192 8
0.425 -0.518 0.391 9
0.517 -0.461 0.407 8
0.479 -0.395 0.316 9
0.431 -0.356 0.285 6
0.278 -0.312 0.17 10
0.024 -0.311 -0.085 9
-0.253 -0.329 -0.491 8
-0.422 -0.329 -0.839 9
-0.409 -0.304 -0.953 8
-0.272 -0.257 -0.78 8
-0.097 -0.212 -0.412 9
-0.087 -0.191 -0.371 8
0.134 -0.17 -0.042 9
0.412 -0.209 0.175 8
0.567 -0.387 0.227 8
0.562 -0.537 0.104 7
0.537 -0.496 -0.236 10
0.556 -0.389 -0.695 9
0.5 -0.35 -0.625 8
0.565 -0.257 -1.013 8
0.594 -0.2 -1.341 9
0.57 -0.288 -1.509 8
0.512 -0.336 -1.398 9
0.434 -0.235 -0.962 8
0.39 -0.211 -0.459 8
0.321 -0.19 -0.413 9
0.27 -0.247 -0.066 8
0.242 -0.385 0.336 7
0.23 -0.442 0.675 10
0.288 -0.589 0.771 8
0.462 -0.949 0.776 9
0.416 -0.854 0.698 8
0.628 -1.212 0.675 8
0.761 -1.448 0.63 9
0.809 -1.48 0.603 8
0.892 -1.249 0.473 9
0.904 -1.004 0.079 8
0.417 -0.609 -0.494 8
0.375 -0.548 -0.444 9
-0.405 0.179 -0.663 7
-1.038 0.693 -0.458 10
-1.194 0.373 -0.329 8
-0.885 -0.329 -0.116 8
-0.629 -0.686 0.11 9
-0.424 -0.804 -0.037 8
-0.381 -0.723 -0.033 9
-0.094 -0.82 -0.401 8
0.216 -0.742 -0.817 8
0.524 -0.57 -1.155 9
0.747 -0.484 -1.24 8
0.681 -0.439 -1.134 9
0.613 -0.395 -1.021 6
0.283 -0.31 -0.793 10
-0.175 -0.073 -0.457 9
-0.648 0.318 -0.295 8
-0.865 0.733 -0.389 8
-0.669 1.119 -0.589 9
-0.141 1.428 -0.901 8
0.486 1.618 -1.207 9
0.437 1.456 -1.087 8
0.976 1.44 -1.454 8
1.26 1.233 -1.834 9
1.097 0.957 -2.141 8
0.525 0.471 -2.549 7
-0.135 -0.241 -2.816 10
-0.698 -0.804 -2.706 8
-0.628 -0.723 -2.435 9
-1.016 -0.965 -2.101 8
-1.182 -1.06 -1.656 9
-1.045 -1.151 -1.141 8
-0.533 -1.333 -0.62 8
0.138 -1.518 -0.222 9
0.685 -1.567 -0.036 8
0.617 -1.411 -0.032 9
1.075 -1.357 -0.105 8
1.452 -1.419 -0.284 7
1.207 -1.585 -0.274 10
0.505 -1.211 -0.151 8
-0.071 -0.6 -0.093 9
-0.096 -0.267 0.02 8
-0.086 -0.241 0.018 8
0.863 -0.066 0.081 9
2.634 -0.231 0.283 8
4.79 -0.837 1.087 8
6.486 -1.54 2.573 9
7.454 -2.745 4.469 8
6.709 -2.47 4.022 9
6.04 -3.16 5.765 6
3.729 -2.688 6.707 10
1.89 -2.22 6.513 9
1.609 -1.699 5.668 8
3.124 -1.512 4.759 9
4.952 -1.187 3.508 8
4.457 -1.069 3.157 8
5.468 0.033 1.303 9
6.228 1.108 -0.644 8
6.772 1.628 -1.696 9
6.553 1.847 -1.126 8
5.472 1.895 0.869 8
4.925 1.705 0.782 7
3.536 1.826 3.342 10
2.94 2.145 5.823 9
3.488 2.554 7.667 8
3.98 3.108 8.013 8
3.415 3.836 6.339 9
2.093 4.558 3.403 8
0.604 4.979 0.854 9
0.544 4.481 0.768 8
-0.923 4.431 -0.22 8
-2.213 3.805 0.33 9
-3.143 2.818 1.405 8
-3.757 1.766 2.135 7
-4.383 0.844 2.058 10
-5.115 0.163 1.078 8
-4.603 0.147 0.971 9
-5.031 -0.333 -0.067 8
-4.936 -0.796 -0.533 8
-4.499 -1.414 -0.409 9
-4.041 -2.122 0.124 8
-3.839 -2.671 0.593 9
-3.675 -2.944 0.564 8
-3.307 -2.649 0.508 8
-2.798 -2.755 -0.059 9
-1.512 -2.944 -0.889 7
0.152 -3.243 -1.77 10
0.955 -3.205 -2.776 8
0.857 -3.072 -3.98 8
0.245 -2.996 -4.922 9
0.22 -2.696 -4.43 8
-0.919 -2.099 -4.402 9
-1.737 -1.348 -3.137 8
-1.646 -0.962 -1.185 8
-1.009 -0.809 0.585 9
-0.379 -0.882 1.529 8
-0.341 -1.114 1.68 8
-0.307 -1.002 1.512 7
0.382 -1.279 1.185 10
0.358 -1.695 0.405 9
0.053 -2.316 -0.639 8
-0.564 -2.957 -1.349 8
-1.209 -3.351 -1.227 9
-1.088 -3.016 -1.105 8
-1.257 -3.054 -0.217 9
-0.605 -2.733 0.738 8
0.42 -2.07 1.026 8
1.161 -1.109 0.361 9
1.352 -0.171 -1.154 8
1.217 -0.154 -1.038 7
0.803 0.467 -2.764 10
-0.1 0.747 -3.849 8
-1.194 0.625 -3.869 9
-2.0 0.089 -2.614 8
-2.138 -0.357 -0.521 9
-1.449 -0.355 1.351 8
-0.07 -0.157 2.286 8
-0.063 -0.141 2.057 9
1.084 0.222 1.615 8
0.819 1.024 -0.263 9
-0.604 2.025 -2.926 8
-2.726 2.628 -5.354 7
-4.887 2.779 -6.772 10
-6.507 3.021 -6.203 8
-5.856 2.718 -5.582 8
-9.963 7.919 -1.306 9
-9.403 12.397 6.692 8
0.295 7.626 14.531 9
9.047 -0.633 16.745 8
12.655 -8.192 11.376 8
10.881 -10.479 3.057 9
9.793 -9.431 2.751 8
3.401 -3.789 -2.57 9
-2.762 2.55 -6.833 6
-6.438 6.142 -10.904 10
-7.64 7.16 -11.478 9
-6.407 4.976 -9.525 8
-4.522 2.121 -6.427 9
-4.069 1.909 -5.785 8
-2.35 0.164 -2.559 8
-1.031 0.01 -0.16 9
-0.24 0.578 1.176 8
0.153 0.649 1.581 9
0.27 0.0 1.622 8
0.051 -0.818 1.718 8
0.046 -0.736 1.546 7
-0.412 -1.118 1.506 10
-0.906 -0.878 1.335 9
-1.067 -0.36 1.227 8
-0.608 -0.035 1.361 8
0.015 0.019 1.91 9
0.013 0.017 2.439 8
0.286 0.015 2.195 9
-0.027 -0.522 2.143 8
-0.999 -0.81 1.571 8
-2.211 -0.83 0.994 9
-3.29 -0.827 0.612 8
-2.961 -0.744 0.551 7
-3.481 -0.695 0.331 10
-3.311 -0.714 0.113 8
-2.539 -1.227 -0.112 9
-1.285 -2.115 -0.147 8
-0.108 -2.83 0.008 8
0.382 -2.725 0.6 9
-0.108 -1.831 1.541 8
-0.097 -1.648 1.387 9
-1.115 -0.683 1.93 8
-2.042 -0.124 1.91 8
-2.491 0.056 1.604 9
-2.178 0.013 1.064 6
-1.153 -0.117 0.427 11
0.063 -0.238 -0.282 8
0.057 -0.214 -0.253 8
1.059 -0.311 -1.091 9
1.171 -0.303 -1.886 8
0.284 -0.116 -2.025 8
-0.739 0.015 -1.243 9
-1.404 0.09 0.073 8
-1.477 -0.231 1.225 9
-1.329 -0.208 1.103 8
-0.819 -0.814 1.594 8
0.021 -0.942 1.712 7
0.775 -0.726 1.57 10
0.926 -0.333 0.787 9
0.438 0.08 -0.326 8
-0.163 0.412 -0.966 8
-0.146 0.371 -0.869 9
-0.484 0.54 -0.926 8
-0.481 0.482 -0.541 9
-0.319 0.357 0.056 8
0.174 0.13 -0.135 8
0.682 0.268 -1.393 9
0.836 0.85 -2.354 8
0.752 0.765 -2.119 7
0.693 1.134 -1.804 10
0.401 1.125 -0.756 8
0.08 0.709 -0.023 9
-0.227 0.124 0.352 8
-0.513 -0.325 0.719 8
-0.68 -0.553 0.895 9
-0.612 -0.498 0.805 8
-0.543 -0.503 0.588 9
-0.203 -0.333 0.226 8
0.195 -0.154 -0.173 8
0.413 -0.037 -0.633 9
0.371 -0.034 -0.569 7
0.362 -0.033 -0.299 10
0.17 -0.03 -0.269 8
-0.041 -0.256 0.3 8
-0.103 -0.428 0.879 9
-0.044 -0.477 1.414 8
0.112 -0.457 1.67 9
0.347 -0.462 1.506 8
0.312 -0.416 1.355 8
0.465 -0.375 1.037 9
0.507 -0.272 0.723 8
0.595 -0.235 0.285 9
0.681 -0.238 -0.164 6
0.668 -0.251 -0.552 10
0.463 -0.174 -0.861 9
0.417 -0.157 -0.775 8
0.061 0.016 -0.908 9
-0.259 0.106 -0.94 8
-0.478 0.085 -0.946 8
-0.512 0.0 -0.943 9
-0.4 -0.077 -0.864 8
-0.29 -0.095 -0.575 9
-0.261 -0.085 -0.517 8
-0.26 -0.027 -0.149 8
-0.301 -0.018 0.095 7
-0.263 -0.222 0.207 10
-0.177 -0.397 0.155 8
-0.094 -0.486 -0.018 9
-0.087 -0.41 0.094 8
-0.078 -0.369 0.084 9
-0.096 -0.154 0.513 8
-0.114 -0.136 0.931 8
-0.246 -0.291 1.366 9
-0.419 -0.541 1.609 8
-0.538 -0.718 1.372 9
-0.61 -0.651 0.772 8
-0.549 -0.586 0.695 7
-0.596 -0.286 0.028 10
-0.61 0.058 -0.546 8
-0.562 0.244 -0.993 9
-0.449 0.303 -1.371 8
-0.327 0.318 -1.661 8
-0.22 0.31 -1.707 9
-0.198 0.279 -1.537 8
-0.08 0.308 -1.347 9
0.04 0.387 -0.951 8
0.167 0.491 -0.374 8
0.322 0.619 0.118 9
0.29 0.557 0.106 6
0.547 0.578 0.341 10
0.884 0.431 0.402 9
1.107 0.227 0.375 8
1.116 0.059 0.345 9
0.852 0.044 0.354 8
0.451 0.12 0.397 8
0.15 0.119 0.441 9
0.135 0.107 0.397 8
-0.004 0.029 0.402 9
0.002 -0.049 0.345 8
0.082 -0.092 0.262 8
0.146 -0.122 0.184 7
0.114 -0.145 0.112 10
-0.003 -0.149 0.084 9
-0.003 -0.134 0.075 8
-0.202 -0.186 0.085 8
-0.458 -0.278 0.079 9
-0.662 -0.283 0.07 8
-0.65 -0.308 0.095 9
-0.422 -0.367 0.106 8
-0.169 -0.311 0.089 8
-0.152 -0.28 0.08 9
-0.036 -0.157 0.064 8
-0.019 -0.084 0.037 7
-0.155 0.07 -0.019 10
-0.409 0.219 -0.011 8
-0.603 0.177 0.054 9
-0.687 0.07 0.069 8
-0.618 0.063 0.062 8
-0.537 -0.109 0.04 9
-0.297 -0.172 -0.079 8
-0.001 -0.014 -0.249 9
0.26 0.216 -0.368 8
0.418 0.373 -0.439 8
0.399 0.474 -0.326 9
0.359 0.426 -0.293 7
0.232 0.455 -0.044 10
0.177 0.313 0.179 8
0.108 0.253 0.254 8
-0.053 0.314 0.204 9
-0.114 0.315 0.178 8
-0.023 0.288 0.13 9
-0.021 0.259 0.117 8
0.146 0.197 0.057 8
0.271 0.177 0.052 9
0.279 0.214 0.102 8
0.168 0.194 0.103 9
0.151 0.175 0.093 6
-0.044 0.004 -0.109 10
-0.04 0.004 -0.098 9
-0.05 -0.064 -0.242 8
-0.181 -0.01 -0.237 8
-0.449 0.144 -0.128 9
-0.655 0.228 -0.071 8
-0.658 0.19 -0.05 9
-0.592 0.171 -0.045 8
-0.27 0.041 0.008 8
0.055 -0.064 -0.056 9
0.122 -0.105 -0.168 8
0.075 -0.128 -0.1 7
-0.125 -0.036 0.021 10
-0.372 0.086 0.085 8
-0.335 0.077 0.077 9
-0.278 0.015 0.078 8
-0.221 -0.042 0.099 9
-0.407 0.054 0.326 8
-0.449 0.02 0.442 8
-0.415 -0.064 0.257 9
-0.38 -0.029 0.052 8
-0.342 -0.026 0.047 9
-0.302 0.035 -0.101 8
-0.35 0.085 -0.168 7
-0.497 -0.01 -0.107 10
-0.731 -0.074 -0.006 8
-0.857 -0.078 0.003 9
-0.702 -0.106 -0.172 8
-0.632 -0.096 -0.155 8
-0.284 -0.077 -0.44 9
-0.045 -0.009 -0.609 8
-0.105 0.159 -0.545 8
-0.2 0.306 -0.258 9
-0.126 0.355 0.038 8
0.033 0.286 0.193 9
0.03 0.257 0.174 6
0.163 0.114 0.228 10
0.242 -0.009 0.143 9
0.286 -0.177 -0.088 8
0.263 -0.187 -0.203 9
0.204 0.028 -0.143 8
# end
#Thu Feb 26 20:29:47 GMT+08:00 2015
