# Supplementary material for: Abnormal Gait Behavior Detection for Elderly Based on Enhanced Wigner-Ville Analysis and Cloud Incremental SVM Learning
Source: Hindawi journal article supplement (doi:10.1155/2016/5869238), 2016-01-01
Supplement: f1 [file 5869238.f1.zip › Supplementary Materials/Original Data/Forward fall Ending lying flat/original__66.txt]

# Accelerometer Values
# filename:  original__66.txt
# Saving start time: Thu Feb 26 20:30:02 GMT+08:00 2015

# sensor resolution: 0.0095825195m/s^2
#Sensorvendor: KIONIX, name: KX023 Accelerometer, type: 1,version : 1, range 39.240005

# X value, Y value, Z value, time diff in ms
-0.152 -0.172 -0.255 8
-0.137 -0.155 -0.23 7
-0.112 -0.123 -0.231 10
-0.036 -0.136 -0.159 8
0.119 -0.128 -0.021 9
0.267 -0.108 0.109 8
0.33 -0.103 0.235 8
0.337 -0.106 0.35 9
0.303 -0.096 0.315 8
0.252 -0.1 0.369 9
0.114 -0.086 0.317 8
-0.032 -0.063 0.183 8
-0.103 -0.046 0.051 9
-0.122 -0.024 -0.061 7
-0.139 0.032 -0.177 10
-0.125 0.029 -0.159 8
-0.142 0.11 -0.257 8
-0.108 0.179 -0.265 9
0.052 0.234 -0.133 8
0.103 0.127 -0.071 9
0.028 -0.132 -0.091 8
0.059 -0.235 0.091 8
0.053 -0.211 0.082 9
0.131 -0.19 0.327 8
0.222 -0.17 0.431 9
0.281 -0.08 0.458 6
0.272 -0.031 0.369 10
0.193 -0.14 0.199 9
0.069 -0.228 0.1 8
0.062 -0.205 0.09 9
-0.019 -0.095 0.109 8
-0.225 -0.04 0.086 8
-0.373 -0.125 -0.026 9
-0.245 -0.182 -0.098 8
0.023 -0.125 -0.081 8
0.315 0.067 -0.029 9
0.283 0.061 -0.026 8
0.448 0.228 -0.047 7
0.485 0.305 -0.088 10
0.399 0.238 -0.123 8
0.297 0.163 -0.125 9
0.145 0.106 -0.08 8
-0.009 -0.086 -0.082 9
-0.008 -0.078 -0.073 8
0.014 -0.306 -0.131 8
0.182 -0.419 -0.127 9
0.449 -0.357 -0.06 8
0.774 -0.151 -0.028 9
1.023 0.088 -0.063 8
0.921 0.079 -0.056 7
0.933 0.262 -0.122 10
0.744 0.401 -0.161 8
0.456 0.461 -0.173 9
0.174 0.413 -0.192 8
-0.02 0.275 -0.271 8
-0.107 0.06 -0.418 9
-0.067 -0.17 -0.485 8
-0.061 -0.153 -0.437 8
0.081 -0.306 -0.361 9
0.345 -0.305 -0.2 8
0.601 -0.21 -0.009 9
0.718 -0.149 0.127 6
0.722 -0.117 0.171 10
0.65 -0.105 0.154 9
0.52 0.003 0.155 8
0.262 0.108 0.139 9
-0.004 0.125 0.04 8
-0.177 0.11 -0.116 8
-0.24 0.085 -0.227 9
-0.237 0.103 -0.227 8
-0.213 0.093 -0.205 9
-0.194 0.083 -0.077 8
-0.154 -0.118 0.078 8
-0.088 -0.326 0.154 7
0.036 -0.253 0.154 10
0.235 0.018 0.052 9
0.422 0.232 -0.214 8
0.38 0.208 -0.192 8
0.497 0.329 -0.522 9
0.54 0.391 -0.748 8
0.513 0.39 -0.83 9
0.331 0.317 -0.769 8
0.037 0.17 -0.49 8
-0.215 0.08 -0.049 9
-0.193 0.072 -0.044 8
-0.345 -0.102 0.222 7
-0.371 -0.401 0.191 10
-0.309 -0.55 0.155 8
-0.213 -0.48 0.276 9
-0.106 -0.368 0.387 8
-0.026 -0.367 0.392 8
-0.024 -0.331 0.353 9
-0.045 -0.343 0.272 8
-0.184 -0.312 -0.085 9
-0.426 -0.136 -0.797 8
-0.701 0.069 -1.493 8
-0.898 0.197 -1.977 9
-0.808 0.177 -1.78 7
-0.852 0.314 -2.154 10
-0.714 0.413 -2.289 8
-0.445 0.453 -1.946 8
-0.194 0.331 -1.236 9
-0.051 0.01 -0.364 8
-0.02 -0.29 0.617 9
-0.187 -0.432 1.381 8
-0.168 -0.389 1.243 8
-0.484 -0.401 1.479 9
-0.833 -0.352 1.327 8
-1.117 -0.307 0.995 9
-1.0 -0.296 0.491 6
-0.464 -0.294 -0.048 10
-0.417 -0.265 -0.043 9
0.232 -0.217 -0.628 8
0.68 -0.002 -1.248 8
0.94 0.143 -1.663 9
1.04 0.006 -1.718 8
0.755 -0.134 -1.428 9
0.311 -0.206 -1.016 8
0.28 -0.185 -0.914 8
-0.001 -0.254 -0.629 9
-0.012 -0.326 -0.484 8
0.164 -0.396 -0.465 7
0.489 -0.535 -0.563 10
0.838 -0.739 -0.53 8
0.979 -0.866 -0.217 9
0.881 -0.779 -0.196 8
0.836 -0.8 0.357 9
0.692 -0.749 1.035 8
0.462 -0.627 1.443 8
0.36 -0.424 1.262 9
0.63 -0.33 0.631 8
1.052 -0.39 0.015 9
0.946 -0.351 0.013 8
1.223 -0.518 -0.322 7
1.239 -0.784 -0.281 10
1.005 -1.069 0.086 8
0.644 -1.367 0.61 8
0.295 -1.554 1.057 9
0.009 -1.516 1.254 8
0.008 -1.365 1.129 9
-0.009 -1.444 0.854 8
0.282 -1.594 0.171 8
0.576 -1.481 -0.452 9
0.747 -1.252 -0.984 8
0.745 -1.068 -1.4 9
0.671 -0.961 -1.26 6
0.395 -0.808 -1.458 10
-0.041 -0.729 -1.56 9
-0.406 -0.759 -1.505 8
-0.691 -0.787 -1.15 9
-0.86 -0.735 -0.569 8
-0.796 -0.527 0.096 8
-0.464 -0.21 0.618 9
-0.417 -0.189 0.556 8
-0.027 0.149 0.943 9
0.581 0.236 1.344 8
1.366 0.105 1.856 8
1.808 0.024 2.284 7
1.802 0.008 2.287 10
1.622 0.016 1.935 9
1.46 0.014 1.742 8
0.853 -0.107 1.303 8
0.464 -0.294 0.946 9
0.19 -0.41 0.724 8
0.325 -0.543 0.925 8
0.745 -0.686 1.762 9
0.671 -0.617 1.585 8
0.996 -0.662 2.645 9
1.033 -0.6 3.399 8
0.729 -0.511 3.841 7
0.412 -0.472 4.08 10
0.25 -0.569 4.189 8
0.247 -0.808 4.336 9
0.223 -0.727 3.902 8
0.659 -1.012 4.393 8
1.362 -1.236 5.202 9
1.607 -1.318 5.653 8
1.298 -1.286 5.221 9
1.016 -1.217 4.156 8
1.059 -1.188 3.169 8
0.953 -1.069 2.852 9
1.005 -1.066 2.338 6
1.168 -1.077 2.312 11
0.986 -1.053 2.384 8
0.137 -0.847 2.238 8
-0.376 -0.444 2.214 9
-0.801 0.086 1.935 8
-0.721 0.077 1.742 9
-1.482 0.58 0.669 8
-1.855 0.987 -0.57 8
-1.799 1.002 -1.474 9
-1.548 0.767 -2.018 8
-1.422 0.646 -2.433 8
-1.28 0.581 -2.19 7
-1.467 0.495 -2.747 10
-1.592 0.402 -3.049 9
-1.53 0.274 -3.028 8
-1.279 0.171 -2.523 8
-1.011 0.068 -1.772 9
-0.57 0.115 -1.159 8
-0.14 0.238 -0.657 9
-0.126 0.214 -0.591 8
0.088 0.146 -0.304 8
0.247 0.133 -0.123 9
0.222 0.234 -0.062 8
0.052 0.283 -0.153 7
-0.093 0.293 -0.309 10
-0.084 0.215 -0.663 8
-0.075 0.193 -0.596 9
-0.047 0.064 -1.181 8
0.161 0.017 -1.662 8
0.356 -0.076 -1.891 9
0.505 -0.07 -1.937 8
0.431 0.081 -1.841 9
0.388 0.073 -1.657 8
-0.135 0.029 -1.54 8
-0.884 -0.28 -1.466 9
-1.198 -0.344 -1.274 7
-1.038 -0.02 -1.039 10
-0.731 0.064 -1.103 8
-0.246 0.073 -1.068 8
-0.221 0.065 -0.961 9
0.211 0.341 -0.528 8
0.214 0.736 -0.19 9
0.172 0.819 -0.021 8
0.451 0.504 0.297 8
0.773 0.161 0.819 9
0.983 -0.101 1.478 8
0.884 -0.091 1.33 9
0.982 -0.307 1.919 6
0.797 -0.294 2.093 10
0.389 -0.059 1.69 9
0.002 0.105 0.926 8
-0.403 0.187 0.201 9
-0.73 0.199 -0.29 8
-0.657 0.179 -0.261 8
-0.745 0.134 -0.464 9
-0.552 0.089 -0.466 8
-0.224 0.078 -0.514 9
0.014 0.089 -0.659 8
0.077 0.123 -0.842 8
0.069 0.11 -0.758 7
-0.034 0.206 -0.957 10
-0.197 0.332 -1.197 8
-0.299 0.438 -1.419 9
-0.345 0.504 -1.497 8
-0.347 0.446 -1.432 9
-0.285 0.256 -1.248 8
-0.155 0.064 -1.008 8
-0.14 0.058 -0.907 9
-0.02 -0.069 -0.736 8
-0.035 -0.176 -0.711 9
-0.155 -0.33 -0.759 8
-0.221 -0.493 -0.704 7
-0.165 -0.628 -0.504 10
0.0 -0.734 -0.373 8
0.0 -0.661 -0.336 9
0.16 -0.73 -0.514 8
0.174 -0.771 -0.995 8
0.065 -0.82 -1.641 9
-0.036 -0.888 -2.295 8
-0.073 -0.992 -2.779 9
-0.066 -1.131 -2.979 8
-0.059 -1.018 -2.681 8
-0.351 -1.164 -2.651 9
-0.381 -1.367 -3.139 6
0.638 -0.599 -3.133 10
2.6 3.591 3.202 9
3.622 7.39 12.055 8
3.26 6.651 10.849 9
2.897 5.197 13.747 8
2.318 0.589 11.132 8
1.053 -2.695 6.055 9
-1.429 -2.63 1.299 8
-3.131 -2.27 -2.444 9
-3.498 -2.566 -5.1 8
-3.148 -2.309 -4.59 8
-3.121 -1.633 -5.843 7
-2.748 -0.654 -5.6 10
-2.221 -0.052 -4.076 9
-1.699 0.23 -1.984 8
-1.285 0.246 -0.167 8
-0.851 0.161 0.849 9
-0.766 0.145 0.764 8
-0.288 0.111 0.917 9
0.062 0.139 0.51 8
0.263 0.2 -0.046 8
0.413 0.23 -0.613 9
0.501 0.188 -1.065 8
0.451 0.169 -0.959 7
0.422 0.12 -1.149 10
0.329 0.09 -0.988 8
0.254 0.053 -0.653 9
0.309 0.001 -0.581 8
0.346 0.025 -0.737 8
0.284 0.113 -0.817 9
0.213 0.213 -0.579 8
0.192 0.192 -0.521 9
0.045 0.214 -0.122 8
-0.191 0.163 0.104 8
-0.395 0.141 0.212 9
-0.418 0.178 0.389 7
-0.341 0.41 0.655 10
-0.206 0.68 0.447 8
-0.185 0.612 0.402 8
0.093 0.745 -0.4 9
0.329 0.908 -1.179 8
0.32 1.084 -1.519 9
0.169 1.068 -1.413 8
0.032 0.886 -1.122 8
-0.061 0.643 -0.803 9
-0.055 0.579 -0.722 8
-0.138 0.386 -0.347 9
-0.281 0.278 0.073 6
-0.474 0.204 0.39 10
-0.646 0.129 0.478 9
-0.764 0.076 0.409 8
-0.822 0.073 0.341 8
-0.74 0.065 0.307 9
-0.758 0.084 0.29 8
-0.692 0.082 0.269 9
-0.527 0.071 0.205 8
-0.345 0.08 0.019 8
-0.205 0.117 -0.253 9
-0.083 0.166 -0.549 8
-0.075 0.149 -0.494 7
0.097 0.154 -0.622 10
0.29 0.11 -0.401 8
0.404 0.06 0.01 9
0.422 0.004 0.374 8
0.358 -0.084 0.594 9
0.22 -0.164 0.717 8
0.198 -0.148 0.645 8
0.133 -0.173 0.706 9
0.186 -0.162 0.656 8
0.232 -0.13 0.493 9
0.236 -0.057 0.236 8
0.212 -0.051 0.212 7
0.193 0.023 -0.037 10
0.139 0.041 -0.244 8
0.025 0.024 -0.395 9
-0.082 -0.019 -0.423 8
-0.085 -0.075 -0.348 8
0.023 -0.09 -0.183 9
0.137 -0.069 0.022 8
0.123 -0.062 0.019 8
0.171 -0.07 0.198 9
0.162 -0.109 0.309 8
0.097 -0.137 0.339 9
0.037 -0.128 0.309 6
0.045 -0.075 0.194 10
0.085 0.007 0.0 9
0.077 0.007 0.0 8
0.125 0.069 -0.151 9
0.191 0.062 -0.167 8
0.205 0.016 -0.121 8
0.12 -0.018 -0.071 9
0.009 -0.066 -0.03 8
-0.042 -0.113 -0.046 9
-0.037 -0.101 -0.041 8
-0.047 -0.12 -0.129 8
-0.033 -0.121 -0.199 7
-0.014 -0.099 -0.168 10
-0.063 -0.046 -0.063 9
-0.132 -0.089 0.061 8
-0.173 -0.217 0.164 8
-0.155 -0.195 0.147 9
-0.164 -0.321 0.205 8
-0.108 -0.372 0.234 9
-0.057 -0.292 0.258 8
-0.038 -0.203 0.236 8
-0.08 -0.108 0.144 9
-0.141 -0.096 0.032 8
-0.127 -0.087 0.029 7
-0.163 -0.186 -0.082 10
-0.169 -0.249 -0.156 8
-0.082 -0.267 -0.164 9
0.04 -0.179 -0.167 8
0.107 -0.016 -0.133 8
0.143 0.051 -0.025 9
0.129 0.046 -0.022 8
0.158 0.023 0.065 9
0.145 -0.091 0.127 8
0.075 -0.267 0.189 8
0.008 -0.382 0.229 9
0.007 -0.344 0.206 6
0.062 -0.402 0.197 11
0.056 -0.362 0.177 8
0.102 -0.32 0.122 8
0.14 -0.276 0.127 9
0.152 -0.185 0.172 8
0.118 -0.093 0.203 8
0.064 -0.121 0.195 9
0.057 -0.108 0.175 8
-0.053 -0.19 0.158 9
-0.238 -0.229 0.012 8
-0.391 -0.235 -0.064 8
-0.464 -0.22 -0.076 7
-0.446 -0.191 -0.03 10
-0.38 -0.153 0.035 9
-0.342 -0.138 0.031 8
-0.286 -0.124 0.03 8
-0.223 -0.126 -0.031 9
-0.153 -0.111 -0.043 8
-0.087 -0.081 0.002 9
0.025 -0.04 0.064 8
0.168 -0.011 0.111 8
0.151 -0.01 0.1 9
0.219 0.034 0.114 8
0.22 0.074 0.072 7
0.188 0.069 -0.069 10
0.103 0.027 -0.229 8
-0.02 -0.027 -0.333 9
-0.13 -0.039 -0.397 8
-0.117 -0.035 -0.357 9
-0.176 0.0 -0.396 8
-0.206 0.006 -0.399 8
-0.183 -0.038 -0.296 9
-0.153 -0.067 -0.055 8
-0.193 -0.065 0.165 8
-0.246 -0.06 0.245 9
-0.221 -0.054 0.22 7
-0.225 -0.031 0.165 10
-0.175 0.044 0.024 8
-0.152 0.098 -0.046 8
-0.159 0.061 0.011 9
-0.131 0.004 0.12 8
-0.089 -0.034 0.191 9
-0.08 -0.03 0.172 8
-0.032 -0.06 0.191 8
0.011 -0.058 0.187 9
0.049 -0.056 0.163 8
0.083 -0.067 0.109 9
0.08 -0.059 0.025 6
0.061 -0.041 -0.069 10
0.055 -0.037 -0.062 9
0.028 -0.007 -0.1 8
-0.015 0.025 -0.079 9
0.001 0.024 -0.061 8
0.108 -0.001 -0.014 8
0.225 -0.019 0.064 9
0.301 -0.029 0.126 8
0.271 -0.026 0.113 9
0.307 -0.03 0.143 8
0.299 -0.026 0.128 8
0.247 -0.013 0.072 7
0.201 0.019 -0.001 10
0.187 0.079 -0.066 8
0.177 0.13 -0.122 9
0.159 0.117 -0.11 8
0.14 0.125 -0.151 9
0.105 0.086 -0.152 8
0.054 0.043 -0.119 8
0.015 0.028 -0.092 9
-0.003 0.042 -0.107 8
-0.003 0.038 -0.096 9
-0.007 0.089 -0.124 8
0.005 0.143 -0.131 7
0.029 0.175 -0.11 10
0.065 0.171 -0.022 8
0.052 0.103 0.102 9
-0.028 -0.002 0.186 8
-0.025 -0.002 0.167 8
-0.153 -0.074 0.203 9
-0.269 -0.109 0.207 8
-0.326 -0.126 0.175 9
-0.311 -0.116 0.106 8
-0.279 -0.058 -0.017 8
-0.24 0.041 -0.185 9
-0.216 0.037 -0.167 6
-0.162 0.19 -0.274 11
-0.098 0.327 -0.266 8
-0.019 0.376 -0.24 8
-0.022 0.368 -0.253 9
-0.104 0.286 -0.178 8
-0.192 0.124 -0.043 8
-0.173 0.111 -0.038 9
-0.238 -0.048 0.031 8
-0.249 -0.143 0.078 9
-0.228 -0.155 0.125 8
-0.179 -0.105 0.175 8
-0.105 -0.015 0.219 7
-0.045 0.086 0.225 10
-0.04 0.078 0.202 9
-0.038 0.101 0.18 8
-0.143 -0.007 0.105 8
-0.292 -0.145 -0.009 9
-0.388 -0.206 -0.114 8
-0.405 -0.224 -0.191 9
-0.364 -0.215 -0.253 8
-0.327 -0.193 -0.227 8
-0.226 -0.17 -0.161 9
-0.076 -0.125 0.026 8
0.019 -0.093 0.159 7
-0.008 -0.103 0.217 10
-0.096 -0.129 0.227 8
-0.182 -0.159 0.176 9
-0.164 -0.143 0.159 8
-0.201 -0.15 0.045 9
-0.161 -0.123 -0.058 8
-0.099 -0.094 -0.083 8
-0.029 -0.053 -0.009 9
0.023 -0.011 0.088 8
0.276 0.096 0.134 8
0.249 0.086 0.12 9
0.396 0.04 0.036 7
-0.046 -0.11 -0.094 10
-0.608 -0.018 -0.107 8
-0.871 -0.005 -0.132 8
-0.926 -0.212 -0.262 9
-0.834 -0.39 -0.258 8
-0.75 -0.351 -0.232 9
-0.725 -0.427 -0.018 8
-0.525 -0.406 0.298 8
-0.299 -0.337 0.598 9
-0.123 -0.29 0.721 8
-0.032 -0.208 0.704 9
-0.028 -0.187 0.634 6
0.018 -0.092 0.38 10
0.084 -0.004 0.082 9
0.128 0.088 -0.137 8
0.144 0.137 -0.337 9
0.13 0.158 -0.4 8
0.071 0.153 -0.336 8
0.063 0.138 -0.302 9
-0.011 0.13 -0.179 8
-0.065 0.131 -0.119 8
-0.04 0.137 -0.135 9
0.051 0.158 -0.196 8
0.141 0.184 -0.237 7
0.155 0.201 -0.211 10
0.139 0.181 -0.19 8
0.084 0.153 -0.104 9
0.005 0.09 -0.034 8
-0.086 0.04 -0.034 9
# end
#Thu Feb 26 20:30:06 GMT+08:00 20156
