# Supplementary material for: Abnormal Gait Behavior Detection for Elderly Based on Enhanced Wigner-Ville Analysis and Cloud Incremental SVM Learning
Source: Hindawi journal article supplement (doi:10.1155/2016/5869238), 2016-01-01
Supplement: f1 [file 5869238.f1.zip › Supplementary Materials/Original Data/Forward fall Ending lying flat/original__67.txt]

# Accelerometer Values
# filename:  original__67.txt
# Saving start time: Thu Feb 26 20:30:09 GMT+08:00 2015

# sensor resolution: 0.0095825195m/s^2
#Sensorvendor: KIONIX, name: KX023 Accelerometer, type: 1,version : 1, range 39.240005

# X value, Y value, Z value, time diff in ms
-0.264 -0.118 -0.297 9
-0.238 -0.106 -0.267 8
-0.619 0.615 -0.081 8
-0.509 0.709 0.065 9
-0.024 0.228 0.143 8
0.3 -0.003 0.207 9
0.406 -0.038 0.289 8
0.37 -0.059 0.359 8
0.333 -0.053 0.323 9
0.206 -0.026 0.339 6
0.117 -0.022 0.305 10
0.111 -0.014 0.238 9
0.221 -0.013 0.19 8
0.351 -0.105 0.146 9
0.452 -0.209 0.157 8
0.407 -0.188 0.141 8
0.471 -0.201 0.268 9
0.475 -0.191 0.411 8
0.457 -0.172 0.513 9
0.413 -0.12 0.588 8
0.29 -0.09 0.54 8
0.261 -0.081 0.486 7
0.018 -0.137 0.262 10
-0.214 -0.223 0.053 9
-0.307 -0.238 -0.031 8
-0.286 -0.242 -0.076 8
-0.197 -0.207 -0.11 9
-0.024 -0.219 -0.176 8
0.139 -0.326 -0.248 9
0.125 -0.294 -0.223 8
0.19 -0.303 -0.171 8
0.272 -0.224 0.07 9
0.243 -0.12 0.27 8
0.064 0.005 0.188 7
0.051 0.051 -0.003 10
0.228 0.059 -0.141 8
0.205 0.053 -0.127 9
0.38 0.112 -0.194 8
0.431 0.133 -0.221 8
0.35 0.07 -0.26 9
0.162 -0.036 -0.281 8
-0.091 -0.118 -0.226 9
-0.179 -0.2 -0.052 8
-0.161 -0.18 -0.046 8
-0.194 -0.258 0.106 9
-0.23 -0.221 0.187 7
0.041 -0.192 0.266 10
0.442 -0.204 0.248 8
0.719 -0.111 0.201 8
0.647 -0.1 0.233 9
0.743 -0.09 0.21 8
0.648 -0.068 0.236 9
0.439 -0.149 0.231 8
0.158 -0.188 0.288 8
-0.131 -0.158 0.329 9
-0.281 -0.122 0.188 8
-0.253 -0.11 0.169 9
-0.197 -0.105 -0.051 6
0.011 -0.093 -0.177 10
0.28 -0.081 -0.136 9
0.502 -0.083 0.075 8
0.567 -0.106 0.333 8
0.435 -0.126 0.527 9
0.391 -0.114 0.474 8
0.152 -0.111 0.573 9
-0.087 -0.103 0.581 8
-0.255 -0.089 0.519 8
-0.314 -0.062 0.334 9
-0.29 -0.023 0.04 8
-0.261 -0.021 0.036 7
-0.167 0.007 -0.215 10
0.001 0.004 -0.35 8
0.166 -0.023 -0.366 9
0.252 -0.053 -0.266 8
0.246 -0.067 -0.09 9
0.193 -0.067 0.052 8
0.119 -0.061 0.097 8
0.107 -0.055 0.088 9
0.024 -0.051 0.081 8
-0.056 -0.051 0.031 9
-0.087 -0.052 -0.042 8
-0.037 -0.062 -0.089 7
0.032 -0.086 -0.132 10
0.069 -0.128 -0.124 8
0.062 -0.115 -0.111 9
0.07 -0.143 0.031 8
0.069 -0.158 0.208 8
0.053 -0.176 0.291 9
0.004 -0.165 0.292 8
-0.08 -0.126 0.212 8
-0.196 -0.075 0.075 9
-0.177 -0.067 0.068 8
-0.275 -0.039 -0.059 9
-0.313 -0.036 -0.147 6
-0.284 -0.042 -0.201 10
-0.194 -0.057 -0.241 9
-0.1 -0.053 -0.233 8
-0.038 -0.027 -0.15 9
-0.034 -0.024 -0.135 8
0.017 -0.001 -0.051 8
0.066 0.014 -0.02 9
0.084 0.016 -0.031 8
0.052 0.012 -0.055 9
0.007 0.002 -0.103 8
0.006 0.002 -0.092 8
0.002 -0.026 -0.151 7
0.046 -0.075 -0.167 10
0.1 -0.136 -0.169 9
0.13 -0.181 -0.208 8
0.133 -0.181 -0.262 8
0.118 -0.145 -0.29 9
0.106 -0.13 -0.261 8
0.106 -0.107 -0.275 8
0.126 -0.095 -0.294 9
0.131 -0.072 -0.315 8
0.081 -0.059 -0.318 9
-0.021 -0.079 -0.311 8
-0.019 -0.071 -0.279 7
-0.119 -0.113 -0.307 10
-0.17 -0.148 -0.388 8
-0.178 -0.156 -0.461 9
-0.161 -0.139 -0.443 8
-0.097 -0.111 -0.34 8
0.061 -0.112 -0.252 9
0.289 -0.122 -0.208 8
0.26 -0.11 -0.187 9
0.417 -0.082 -0.167 8
0.417 -0.018 -0.189 8
0.288 0.071 -0.198 9
0.132 0.136 -0.229 6
0.045 0.148 -0.284 11
0.045 0.168 -0.293 8
0.041 0.151 -0.263 8
0.15 0.117 -0.386 9
0.391 0.04 -0.47 8
0.633 0.067 -0.428 9
0.765 0.142 -0.464 8
0.797 0.171 -0.57 8
0.734 0.185 -0.636 9
0.66 0.167 -0.573 8
0.481 0.18 -0.54 8
0.198 0.174 -0.504 7
-0.059 0.134 -0.495 10
-0.224 0.059 -0.468 9
-0.228 -0.029 -0.483 8
-0.017 -0.09 -0.627 8
-0.016 -0.081 -0.564 9
0.294 -0.118 -0.673 8
0.601 -0.169 -0.533 9
0.722 -0.297 -0.311 8
0.517 -0.472 -0.103 8
0.152 -0.561 0.196 9
0.136 -0.545 0.462 8
0.123 -0.491 0.416 7
-0.702 -0.522 0.318 10
-0.924 -0.605 0.005 8
-0.747 -0.492 -0.2 9
-0.273 -0.139 -0.454 8
0.307 0.167 -0.784 9
0.277 0.15 -0.706 8
0.803 0.284 -0.919 8
1.138 0.299 -1.052 9
1.226 0.171 -1.174 8
1.006 -0.054 -1.268 8
0.526 -0.255 -1.296 9
0.474 -0.23 -1.166 7
-0.094 -0.428 -1.022 10
-0.55 -0.63 -0.719 8
-0.735 -0.784 -0.432 8
-0.771 -0.988 -0.284 9
-0.739 -1.149 -0.121 8
-0.6 -1.166 0.134 9
-0.386 -1.204 0.263 8
-0.347 -1.083 0.236 8
-0.085 -1.157 0.156 9
0.169 -1.123 -0.072 8
0.375 -0.997 -0.438 9
0.515 -0.854 -0.863 6
0.563 -0.768 -1.106 10
0.475 -0.785 -0.989 9
0.428 -0.707 -0.89 8
0.22 -0.817 -0.537 9
0.008 -0.985 -0.142 8
-0.139 -1.245 0.255 8
-0.278 -1.485 0.598 9
-0.553 -1.509 0.723 8
-0.769 -1.317 0.856 9
-0.692 -1.185 0.77 8
-0.68 -0.922 0.753 8
-0.409 -0.778 0.746 7
0.055 -0.811 1.462 10
0.129 -0.867 2.303 8
0.085 -0.973 2.779 9
0.344 -1.001 3.22 8
0.309 -0.901 2.898 9
0.806 -0.746 3.141 8
1.524 -0.687 2.99 8
1.988 -0.697 2.65 9
1.85 -0.48 2.293 8
1.36 -0.103 2.228 9
1.224 -0.093 2.486 8
0.871 0.08 2.238 7
0.752 0.016 2.771 10
0.895 -0.176 3.319 8
1.114 -0.428 3.553 9
1.101 -0.648 3.451 8
1.024 -0.828 3.025 8
0.921 -0.745 2.722 9
0.865 -0.859 2.226 8
0.842 -0.88 1.908 9
0.947 -0.628 1.877 8
1.313 -0.634 1.946 8
1.206 -0.573 1.519 9
1.085 -0.515 1.367 6
0.469 -0.056 0.242 11
0.535 0.015 -0.846 8
1.227 -0.097 -1.066 8
2.097 -0.323 -0.165 9
2.334 -0.48 1.375 8
2.002 -1.235 2.879 8
1.655 -2.04 3.913 9
1.489 -1.836 3.522 8
1.136 -1.711 3.957 9
0.787 -1.26 3.647 8
0.533 -1.076 2.327 8
0.168 -1.002 0.417 7
-0.489 -0.578 -1.062 10
-0.951 -0.222 -1.264 9
-0.856 -0.2 -1.138 8
-1.08 -0.017 -0.281 8
-1.249 0.097 0.719 9
-1.409 0.167 1.108 8
-1.528 0.195 0.747 9
-1.486 0.293 0.097 8
-1.291 0.473 -0.42 8
-1.162 0.426 -0.378 9
-0.954 0.57 -0.461 8
-0.649 0.633 -0.03 7
-0.192 0.59 0.574 10
0.378 0.619 0.939 8
0.985 0.717 0.773 9
1.412 0.791 -0.008 8
1.271 0.711 -0.007 8
1.218 0.982 -1.011 9
0.563 1.216 -1.992 8
-0.49 1.199 -2.839 9
-1.649 0.968 -3.289 8
-2.598 0.605 -3.305 8
-2.338 0.243 -2.807 9
-2.104 0.219 -2.526 7
-2.525 -0.096 -1.8 10
-2.207 -0.403 -1.359 8
-1.859 -0.554 -1.357 8
-1.597 -0.314 -1.611 9
-0.906 -0.091 -1.703 8
-0.815 -0.082 -1.533 9
0.122 0.135 -1.361 8
0.32 0.663 -1.299 8
0.197 0.921 -1.184 9
0.11 0.725 -0.444 8
-0.205 0.453 0.627 9
-0.185 0.408 0.564 6
-0.457 0.091 1.45 10
-0.408 -0.158 2.062 9
-0.255 -0.214 2.185 8
-0.084 -0.071 1.69 9
0.104 0.279 0.832 8
0.087 0.549 -0.123 8
-0.203 0.572 -0.978 9
-0.182 0.515 -0.88 8
-0.706 0.268 -1.584 9
-1.05 -0.117 -1.946 8
-1.078 -0.196 -1.684 8
-1.113 -0.071 -1.198 7
-1.042 -0.009 -0.893 10
-0.852 0.043 -0.886 8
-0.767 0.038 -0.798 9
-0.646 0.071 -1.058 8
-0.591 0.277 -1.192 9
-0.455 0.468 -1.081 8
-0.215 0.492 -0.85 8
-0.062 0.395 -0.548 9
0.048 0.141 -0.297 8
0.043 0.127 -0.268 9
0.117 -0.218 -0.174 8
0.172 -0.272 -0.153 7
0.27 0.13 -0.175 10
0.313 0.494 -0.29 8
0.363 1.095 0.544 9
0.336 2.037 2.425 8
0.302 1.833 2.182 8
0.451 1.89 2.594 9
0.899 0.655 1.219 8
1.101 -0.602 0.089 9
0.793 -1.098 -0.246 8
0.312 -1.137 -0.222 8
-0.143 -1.085 -0.18 9
-0.129 -0.976 -0.162 6
-0.588 -0.864 -0.235 10
-0.916 -0.601 -0.397 9
-1.007 -0.368 -0.534 8
-0.911 -0.345 -0.582 9
-0.763 -0.348 -0.565 8
-0.586 -0.307 -0.547 8
-0.527 -0.276 -0.492 9
-0.381 -0.263 -0.542 8
-0.296 -0.181 -0.625 9
-0.087 0.023 -0.732 8
0.196 0.256 -0.876 8
0.176 0.231 -0.789 7
0.324 0.468 -0.872 10
0.352 0.773 -0.757 9
0.323 0.863 -0.563 8
0.223 0.734 -0.43 8
0.054 0.652 -0.319 9
0.016 0.526 -0.231 8
0.14 0.452 -0.151 9
0.126 0.407 -0.136 8
0.238 0.487 -0.046 8
0.321 0.616 -0.016 9
0.4 0.71 -0.14 8
0.419 0.731 -0.321 7
0.327 0.642 -0.447 10
0.15 0.451 -0.5 8
0.135 0.406 -0.45 9
-0.087 0.182 -0.462 8
-0.246 -0.064 -0.431 8
-0.304 -0.279 -0.283 9
-0.307 -0.335 -0.001 8
-0.231 -0.285 0.276 9
-0.081 -0.272 0.446 8
-0.073 -0.245 0.401 8
0.063 -0.246 0.448 9
0.112 -0.218 0.411 7
0.096 -0.25 0.364 10
0.026 -0.249 0.31 8
-0.035 -0.163 0.22 8
-0.008 -0.138 0.068 9
-0.007 -0.125 0.061 8
0.057 -0.131 -0.127 9
0.119 -0.093 -0.207 8
0.212 -0.058 -0.088 8
0.391 -0.097 0.09 9
0.591 -0.189 0.204 8
0.705 -0.298 0.26 8
0.634 -0.269 0.234 7
0.644 -0.358 0.24 10
0.535 -0.343 0.215 9
0.331 -0.245 0.187 8
0.097 -0.117 0.119 8
-0.069 -0.008 -0.029 9
-0.062 -0.007 -0.026 8
-0.186 0.048 -0.143 9
-0.335 0.081 -0.172 8
-0.446 0.061 -0.196 8
-0.455 0.01 -0.178 9
-0.357 -0.05 -0.105 8
-0.321 -0.045 -0.094 7
-0.172 -0.1 -0.02 10
-0.055 -0.115 0.045 8
0.034 -0.1 0.085 9
0.14 -0.063 0.113 8
0.264 -0.038 0.129 9
0.316 -0.032 0.128 8
0.228 -0.024 0.117 8
0.205 -0.021 0.105 9
0.089 -0.033 0.045 8
0.014 -0.039 -0.034 9
-0.032 -0.017 -0.068 8
-0.05 -0.01 -0.068 7
-0.053 -0.013 -0.029 10
-0.05 -0.048 0.031 8
-0.045 -0.044 0.028 8
-0.046 -0.063 0.052 9
-0.057 0.002 0.047 8
-0.042 0.02 0.036 9
0.021 -0.01 -0.016 8
0.128 0.038 -0.112 8
0.204 0.113 -0.173 9
0.183 0.102 -0.155 8
0.141 0.112 -0.153 9
0.0 0.039 -0.101 6
-0.206 -0.057 0.003 10
-0.322 -0.164 0.067 9
-0.224 -0.267 0.088 8
-0.086 -0.157 0.14 9
-0.078 -0.141 0.126 8
0.062 -0.028 0.093 8
0.201 -0.049 0.022 9
0.259 0.001 0.057 8
0.225 0.046 0.11 9
0.1 0.056 0.085 8
0.0 0.072 0.001 8
0.0 0.064 0.001 7
-0.043 0.115 -0.107 10
-0.046 0.167 -0.279 9
-0.016 0.151 -0.408 8
-0.007 0.124 -0.353 8
-0.028 0.1 -0.237 9
-0.025 0.09 -0.122 8
-0.033 0.081 -0.11 8
-0.045 -0.014 0.052 9
-0.084 -0.074 0.19 8
-0.124 -0.186 0.242 9
-0.151 -0.245 0.244 8
-0.136 -0.22 0.219 7
-0.155 -0.207 0.194 10
-0.16 -0.173 0.13 8
-0.166 -0.137 0.053 9
-0.153 -0.091 0.01 8
-0.106 -0.049 0.005 8
-0.068 -0.052 0.025 9
-0.064 -0.078 0.06 8
-0.058 -0.07 0.054 9
-0.058 -0.086 0.081 8
-0.024 -0.075 0.069 8
0.02 -0.029 0.024 9
0.072 0.044 -0.03 6
0.175 0.119 -0.079 11
0.32 0.186 -0.133 8
0.288 0.167 -0.12 8
0.406 0.22 -0.158 9
0.454 0.243 -0.156 8
0.406 0.242 -0.141 8
0.268 0.22 -0.117 9
0.101 0.178 -0.039 8
-0.048 0.093 0.073 9
-0.043 0.084 0.066 8
-0.137 -0.054 0.112 8
-0.168 -0.202 0.12 7
-0.18 -0.28 0.145 10
-0.21 -0.292 0.162 9
-0.282 -0.278 0.166 8
-0.331 -0.212 0.163 8
-0.298 -0.19 0.147 9
-0.22 -0.075 0.129 8
-0.109 0.028 0.027 9
-0.1 0.053 -0.165 8
-0.199 0.025 -0.358 8
-0.338 -0.024 -0.479 9
-0.451 -0.083 -0.494 8
-0.406 -0.074 -0.444 7
-0.467 -0.109 -0.333 10
-0.431 -0.099 -0.091 8
-0.291 -0.073 0.142 9
-0.111 -0.049 0.253 8
0.036 -0.038 0.289 8
0.033 -0.036 0.297 9
0.029 -0.033 0.267 8
0.103 -0.038 0.25 9
0.054 -0.066 0.181 8
0.033 -0.098 0.096 8
0.016 -0.13 0.072 9
0.014 -0.117 0.065 7
0.007 -0.136 0.084 10
0.069 -0.12 0.107 8
0.154 -0.04 0.122 8
0.248 0.063 0.112 9
0.392 0.198 0.058 8
0.573 0.321 -0.058 9
0.656 0.358 -0.119 8
0.59 0.322 -0.107 8
0.474 0.314 -0.102 9
0.282 0.263 -0.186 8
0.201 0.2 -0.338 9
0.254 0.181 -0.463 6
0.368 0.196 -0.452 10
0.453 0.195 -0.231 9
0.407 0.175 -0.208 8
0.428 0.145 0.055 9
0.411 0.021 0.214 8
0.274 -0.165 0.377 8
0.006 -0.293 0.47 9
-0.229 -0.365 0.381 8
-0.428 -0.393 0.262 9
-0.385 -0.354 0.236 8
-0.552 -0.318 0.162 8
-0.597 -0.235 0.096 7
-0.525 -0.121 0.018 10
-0.414 0.034 -0.083 8
-0.304 0.179 -0.169 9
-0.206 0.249 -0.184 8
-0.185 0.224 -0.166 9
-0.109 0.245 -0.14 8
-0.041 0.239 -0.125 8
0.006 0.229 -0.13 9
0.036 0.226 -0.101 8
0.057 0.223 -0.023 9
0.068 0.212 0.011 8
0.061 0.19 0.009 7
0.071 0.17 0.005 10
0.058 0.142 0.022 8
0.024 0.068 0.015 9
-0.01 -0.04 -0.027 8
-0.061 -0.134 -0.075 8
-0.054 -0.121 -0.063 9
-0.115 -0.208 -0.057 8
-0.181 -0.251 0.004 9
-0.204 -0.237 0.068 8
-0.137 -0.184 0.128 8
-0.046 -0.079 0.165 9
-0.041 -0.071 0.148 6
0.023 -0.003 0.195 10
0.036 -0.078 0.225 9
-0.08 -0.197 0.213 8
-0.304 -0.304 0.191 9
-0.505 -0.414 0.166 8
-0.619 -0.461 0.134 8
-0.617 -0.418 0.101 9
-0.555 -0.376 0.091 8
-0.45 -0.24 0.073 9
-0.265 -0.043 0.074 8
-0.015 0.157 0.086 8
0.176 0.285 0.066 7
0.179 0.278 0.009 10
0.024 0.137 -0.032 9
0.022 0.124 -0.029 8
-0.2 -0.032 -0.062 8
-0.376 -0.128 -0.118 9
-0.445 -0.176 -0.162 8
-0.428 -0.146 -0.137 9
-0.34 -0.015 -0.123 8
-0.186 0.137 -0.151 8
-0.167 0.124 -0.136 9
-0.019 0.23 -0.175 8
0.05 0.288 -0.176 7
0.062 0.206 -0.078 10
-0.013 -0.002 0.022 8
-0.196 -0.171 0.075 9
-0.418 -0.279 0.106 8
-0.376 -0.251 0.096 8
-0.597 -0.32 0.115 9
-0.729 -0.345 0.135 8
-0.689 -0.338 0.227 9
-0.478 -0.314 0.486 8
-0.217 -0.275 0.721 8
-0.062 -0.218 0.667 9
-0.055 -0.197 0.6 7
-0.006 -0.193 0.314 10
-0.101 -0.014 -0.102 8
-0.126 0.124 -0.559 8
-0.031 0.167 -0.766 9
0.086 0.307 -0.583 8
0.327 0.378 -0.278 9
0.294 0.34 -0.25 8
0.535 0.389 -0.003 8
0.665 0.392 0.116 9
0.656 0.309 0.082 8
0.45 0.154 0.003 9
0.405 0.138 0.003 6
-0.343 -0.239 -0.261 10
-0.308 -0.215 -0.235 9
-0.518 -0.439 -0.206 8
-0.571 -0.528 -0.068 9
-0.443 -0.507 0.138 8
-0.108 -0.279 0.473 8
0.1 -0.176 0.625 9
0.09 -0.354 0.775 8
0.042 -0.318 0.697 8
0.026 -0.424 0.93 9
0.122 -0.544 0.988 8
0.278 -1.076 1.227 7
# end
#Thu Feb 26 20:30:13 GMT+08:00 2015
