# Supplementary material for: Abnormal Gait Behavior Detection for Elderly Based on Enhanced Wigner-Ville Analysis and Cloud Incremental SVM Learning
Source: Hindawi journal article supplement (doi:10.1155/2016/5869238), 2016-01-01
Supplement: f1 [file 5869238.f1.zip › Supplementary Materials/Original Data/Forward fall Ending lying flat/original__68.txt]

# Accelerometer Values
# filename:  original__68.txt
# Saving start time: Thu Feb 26 20:30:17 GMT+08:00 2015

# sensor resolution: 0.0095825195m/s^2
#Sensorvendor: KIONIX, name: KX023 Accelerometer, type: 1,version : 1, range 39.240005

# X value, Y value, Z value, time diff in ms
-0.367 -0.145 -0.203 9
-0.195 -0.152 -0.225 8
-0.001 -0.102 -0.197 9
0.121 -0.053 -0.132 8
0.151 -0.021 -0.045 8
0.136 -0.019 -0.041 9
0.091 -0.009 0.013 6
-0.029 -0.019 0.011 11
-0.16 -0.024 -0.024 8
-0.177 -0.041 -0.06 8
-0.093 -0.064 -0.09 9
-0.008 -0.078 -0.112 8
-0.007 -0.07 -0.101 8
0.05 -0.078 -0.102 9
0.108 -0.077 -0.067 8
0.17 -0.06 -0.03 9
0.196 -0.041 0.003 8
0.166 -0.049 0.046 8
0.15 -0.044 0.041 7
0.084 -0.074 0.078 10
0.001 -0.108 0.094 9
-0.071 -0.136 0.065 8
-0.102 -0.146 0.003 8
-0.071 -0.131 -0.068 9
0.046 -0.097 -0.114 8
0.041 -0.039 -0.119 9
0.037 -0.035 -0.107 8
0.296 -0.004 -0.096 8
0.262 0.001 -0.028 9
0.175 0.004 0.096 8
0.081 -0.014 0.212 7
-0.012 -0.041 0.304 10
-0.01 -0.037 0.273 8
-0.1 -0.074 0.315 9
-0.162 -0.106 0.294 8
-0.173 -0.129 0.216 8
-0.126 -0.147 0.101 9
-0.056 -0.141 0.012 8
0.007 -0.119 -0.051 9
0.007 -0.107 -0.046 8
0.06 -0.077 -0.086 8
0.095 -0.048 -0.077 9
0.119 -0.044 -0.04 7
0.138 -0.053 0.005 10
0.179 -0.045 0.05 8
0.224 -0.025 0.082 8
0.201 -0.023 0.073 9
0.206 -0.028 0.116 8
0.149 -0.037 0.186 9
0.065 -0.009 0.225 8
0.036 0.032 0.187 8
0.06 0.06 0.106 9
0.088 0.079 0.038 8
0.079 0.071 0.034 9
0.069 0.1 -0.005 6
0.032 0.135 -0.031 10
0.001 0.16 -0.055 9
-0.007 0.174 -0.071 8
0.013 0.135 -0.064 9
0.04 0.045 -0.038 8
0.036 0.041 -0.034 8
0.046 -0.049 0.017 9
0.08 -0.112 0.103 8
0.152 -0.141 0.235 9
0.218 -0.159 0.335 8
0.236 -0.152 0.348 8
0.212 -0.137 0.313 7
0.172 -0.083 0.245 10
0.105 -0.024 0.084 8
0.048 0.026 -0.088 9
0.031 0.066 -0.22 8
0.058 0.102 -0.316 9
0.082 0.14 -0.353 8
0.077 0.145 -0.329 8
0.07 0.131 -0.296 9
0.033 0.098 -0.249 8
-0.006 0.06 -0.19 9
-0.03 0.041 -0.157 8
-0.04 0.05 -0.177 7
-0.017 0.066 -0.218 10
0.03 0.066 -0.252 8
0.027 0.06 -0.227 9
0.068 0.071 -0.227 8
0.081 0.087 -0.185 8
0.094 0.071 -0.107 9
0.104 0.043 0.004 8
0.077 0.014 0.107 9
0.013 -0.024 0.176 8
0.011 -0.021 0.158 8
-0.055 -0.061 0.189 9
-0.095 -0.091 0.168 6
-0.114 -0.101 0.112 10
-0.111 -0.11 0.058 9
-0.091 -0.106 0.012 8
-0.048 -0.077 -0.028 9
-0.043 -0.069 -0.025 8
0.019 -0.033 -0.054 8
0.064 -0.008 -0.08 9
0.077 0.01 -0.103 8
0.066 0.047 -0.086 9
0.049 0.058 -0.054 8
0.044 0.052 -0.048 8
0.03 0.029 -0.04 7
0.012 0.006 -0.053 10
0.001 0.006 -0.072 9
-0.001 0.02 -0.074 8
0.008 0.022 -0.061 8
0.035 0.02 -0.022 9
0.032 0.018 -0.019 8
0.061 0.018 0.038 9
0.081 -0.015 0.088 8
0.085 -0.051 0.113 8
0.084 -0.064 0.113 9
0.09 -0.079 0.102 8
0.081 -0.071 0.092 7
0.092 -0.079 0.077 10
0.101 -0.072 0.054 8
0.107 -0.048 0.033 9
0.097 -0.004 0.014 8
0.063 0.028 -0.017 8
0.013 0.042 -0.085 9
-0.038 0.019 -0.163 8
-0.034 0.017 -0.147 9
-0.092 -0.029 -0.181 8
-0.135 -0.061 -0.159 8
-0.112 -0.093 -0.072 9
0.06 0.149 0.221 7
0.225 0.383 0.468 10
0.228 0.101 0.298 8
0.206 0.091 0.269 8
0.182 -0.292 0.093 9
0.103 -0.311 0.23 8
-0.027 -0.091 0.446 9
-0.053 0.057 0.473 8
0.016 0.063 0.203 8
0.147 -0.001 -0.21 9
0.132 0.0 -0.189 8
0.25 0.02 -0.546 9
0.239 0.112 -0.749 6
0.13 0.121 -0.752 10
-0.003 0.039 -0.596 9
-0.092 -0.063 -0.374 8
-0.085 -0.14 -0.149 8
-0.076 -0.126 -0.134 9
0.032 -0.14 0.173 8
0.263 -0.061 0.581 9
0.543 0.019 0.809 8
0.699 0.04 0.781 8
0.699 0.01 0.6 9
0.555 -0.021 0.286 8
0.499 -0.019 0.257 7
0.281 0.076 -0.064 10
0.125 0.108 -0.39 8
0.11 -0.022 -0.831 9
0.235 -0.123 -1.193 8
0.391 -0.164 -1.273 9
0.352 -0.148 -1.145 8
0.501 -0.162 -0.975 8
0.524 -0.151 -0.749 9
0.474 -0.098 -0.585 8
0.624 0.103 -0.486 9
0.795 0.251 -0.689 8
0.715 0.226 -0.62 7
0.717 0.18 -1.054 10
0.596 0.058 -1.263 8
0.368 -0.083 -0.998 9
0.08 -0.165 -0.432 8
-0.223 -0.202 0.189 8
-0.399 -0.202 0.804 9
-0.367 -0.172 1.195 8
-0.33 -0.155 1.076 8
-0.181 -0.12 1.007 9
0.006 -0.101 0.666 8
0.18 -0.144 0.317 9
0.249 -0.282 0.281 6
0.191 -0.484 0.625 10
0.067 -0.666 0.837 9
0.06 -0.599 0.753 8
0.005 -0.658 0.683 9
0.048 -0.509 0.497 8
0.173 -0.271 0.188 8
0.305 -0.088 -0.293 9
0.196 0.171 -0.929 8
-0.035 0.666 -1.253 9
-0.031 0.6 -1.127 8
-0.133 1.029 -0.896 8
-0.145 0.966 -0.572 7
-0.113 0.532 -0.473 10
0.019 0.179 -0.691 9
0.118 0.081 -0.759 8
0.235 0.001 -0.635 8
0.212 0.001 -0.572 9
0.325 -0.229 -0.626 8
0.299 -0.361 -0.835 9
0.535 -0.28 -0.771 8
0.684 -0.369 -0.605 8
0.355 -0.426 -0.812 9
0.32 -0.383 -0.73 8
-0.011 -0.297 -1.215 7
-0.125 -0.403 -1.942 10
-0.045 -0.654 -2.428 8
-0.06 -0.934 -2.44 9
-0.309 -1.247 -2.054 8
-0.635 -1.478 -1.239 8
-0.571 -1.33 -1.115 9
-0.807 -1.403 -0.149 8
-0.798 -1.47 0.377 9
-0.735 -1.493 0.35 8
-0.677 -1.362 0.047 8
-0.454 -1.126 -0.648 9
-0.409 -1.013 -0.584 6
-0.117 -0.668 -1.627 11
0.155 -0.166 -2.575 8
0.5 0.31 -3.336 8
1.068 0.511 -3.67 9
1.738 0.423 -3.193 8
2.23 0.223 -2.099 9
2.487 0.046 -0.719 8
2.238 0.042 -0.647 8
2.299 -0.186 0.621 9
2.01 -0.457 1.437 8
1.362 -0.657 1.91 8
0.652 -0.84 2.167 7
0.107 -1.067 2.242 10
-0.31 -1.273 2.12 9
-0.279 -1.146 1.908 8
-0.681 -1.303 1.43 8
-0.836 -1.379 0.689 9
-0.322 -1.456 0.193 8
0.256 -1.599 -0.083 9
0.259 -1.688 -0.382 8
-0.019 -1.642 -0.585 8
-0.017 -1.477 -0.526 9
-0.494 -1.334 -0.65 8
-1.018 -1.184 -0.574 7
-1.222 -1.12 -0.286 10
-1.077 -1.163 0.0 8
-0.625 -1.136 0.117 9
0.074 -0.749 0.029 8
0.066 -0.674 0.026 9
0.833 -0.09 -0.136 8
1.482 0.44 -0.233 8
1.673 0.882 -0.044 9
1.338 1.125 0.527 8
0.963 1.069 1.531 9
0.908 0.695 2.783 8
0.817 0.626 2.505 7
1.059 0.22 3.659 10
1.558 0.001 4.558 8
2.155 0.178 5.112 8
3.059 0.612 5.143 9
3.796 1.22 4.459 8
3.416 1.098 4.013 9
3.256 1.898 3.612 8
2.739 2.102 1.542 8
2.339 1.645 1.079 9
1.94 0.946 1.426 8
1.908 -0.125 2.548 9
1.717 -0.112 2.293 6
2.026 -1.1 3.686 10
2.336 -1.482 4.506 9
2.731 -1.567 4.664 8
2.862 -1.538 4.44 9
2.657 -1.661 4.359 8
2.28 -2.274 4.79 8
1.775 -3.52 5.448 9
1.598 -3.168 4.904 8
1.024 -4.911 5.463 9
0.296 -6.363 5.738 8
-0.43 -6.907 5.627 8
-1.009 -6.347 5.064 7
-1.717 -4.962 3.805 10
-2.492 -3.633 1.965 9
-2.243 -3.27 1.768 8
-2.452 -2.793 0.634 8
-1.754 -2.719 1.212 9
0.174 -2.465 2.067 8
5.342 0.237 0.493 8
9.291 3.331 4.48 9
8.584 2.94 12.255 8
7.725 2.646 11.029 9
2.783 2.415 8.57 8
-3.341 3.565 -3.131 7
-5.58 4.667 -14.569 10
-5.62 5.513 -20.279 8
-6.309 6.151 -19.935 9
-8.246 6.07 -15.452 8
-7.421 5.463 -13.906 8
-9.386 4.514 -8.411 9
-10.094 3.226 -3.572 8
-8.676 1.325 -0.88 9
-5.945 -0.421 -0.748 8
-3.089 -1.577 -1.676 8
-0.726 -2.189 -1.632 9
-0.653 -1.97 -1.469 6
0.937 -1.834 -0.064 11
1.525 -0.893 1.714 8
0.952 0.231 2.75 8
-0.351 0.97 2.616 9
-1.936 1.285 1.726 8
-1.743 1.157 0.965 8
-3.083 1.041 0.868 9
-3.269 -0.013 0.627 8
-2.713 -1.24 0.141 9
-2.49 -1.305 -0.694 8
-2.432 -0.529 -1.226 8
-2.188 -0.476 -1.103 7
-1.839 0.226 -1.067 10
-1.198 0.696 -0.617 9
-0.517 1.019 -0.186 8
0.088 1.119 -0.088 8
0.724 0.845 -0.395 9
1.281 0.256 -1.05 8
1.567 -0.292 -1.592 9
1.411 -0.263 -1.433 8
1.483 -0.563 -1.325 8
1.35 -0.591 -0.542 9
0.929 -0.393 0.509 8
0.325 -0.137 1.369 7
-0.23 -0.006 1.681 10
-0.654 0.003 1.361 8
-0.588 0.002 1.225 9
-0.926 -0.05 0.53 8
-1.194 -0.189 -0.24 8
-1.23 -0.359 -0.756 9
-1.001 -0.432 -0.815 8
-0.561 -0.425 -0.535 9
-0.036 -0.336 -0.259 8
-0.032 -0.302 -0.233 8
0.379 -0.153 -0.135 9
0.657 -0.076 -0.273 7
0.693 -0.012 -0.537 10
0.497 -0.004 -0.653 8
0.146 -0.11 -0.479 8
-0.274 -0.232 -0.163 9
-0.247 -0.209 -0.147 8
-0.615 -0.304 0.136 9
-0.929 -0.337 0.407 8
-1.069 -0.329 0.614 8
-0.986 -0.33 0.589 9
-0.785 -0.363 0.32 8
-0.57 -0.372 -0.057 9
-0.513 -0.334 -0.051 6
-0.311 -0.295 -0.373 10
-0.117 -0.234 -0.453 9
0.022 -0.168 -0.279 8
0.089 -0.137 -0.053 9
0.082 -0.128 0.061 8
-0.039 -0.09 0.106 8
-0.035 -0.081 0.096 9
-0.224 -0.032 0.16 8
-0.284 -0.072 0.307 8
-0.162 -0.218 0.451 9
0.035 -0.405 0.438 8
0.032 -0.364 0.394 7
0.172 -0.483 0.088 10
0.196 -0.425 0.08 8
0.166 -0.31 -0.001 9
0.104 -0.2 -0.043 8
0.036 -0.107 -0.08 9
0.017 -0.051 -0.128 8
0.045 0.002 -0.169 8
0.041 0.001 -0.152 9
0.072 0.067 -0.178 8
0.081 0.136 -0.222 9
0.06 0.166 -0.275 8
0.025 0.142 -0.264 7
-0.005 0.096 -0.16 10
-0.014 0.019 -0.038 8
-0.012 0.017 -0.034 9
0.016 -0.103 0.04 8
-0.01 -0.137 0.071 8
-0.108 -0.063 0.079 9
-0.211 0.013 0.077 8
-0.249 0.051 0.045 9
-0.24 0.069 -0.056 8
-0.216 0.062 -0.051 8
-0.225 0.081 -0.182 9
-0.169 0.05 -0.289 6
-0.024 -0.01 -0.374 11
0.137 -0.06 -0.421 8
0.289 -0.058 -0.343 8
0.395 -0.012 -0.159 9
0.355 -0.011 -0.143 8
0.349 0.022 0.022 8
0.12 -0.199 0.055 9
-0.134 -0.471 0.0 8
-0.294 -0.335 0.182 9
-0.371 -0.264 0.44 8
-0.296 -0.307 0.463 8
-0.266 -0.276 0.416 7
-0.135 -0.249 0.3 10
-0.004 -0.367 0.166 9
0.047 -0.461 0.056 8
-0.018 -0.412 -0.009 8
-0.143 -0.197 0.019 9
-0.186 0.067 0.086 8
-0.167 0.06 0.078 9
-0.125 0.259 0.142 8
-0.004 0.304 0.317 8
0.194 0.183 0.589 9
0.283 0.152 0.666 8
0.2 0.202 0.401 7
-0.054 0.298 0.066 10
-0.048 0.268 0.059 8
-0.163 0.365 -0.143 9
-0.016 0.366 -0.346 8
0.098 0.38 -0.624 8
0.257 0.407 -1.037 9
0.505 0.447 -1.685 8
0.719 0.612 -2.321 9
0.647 0.551 -2.089 8
0.77 0.807 -1.596 8
0.359 0.968 1.091 9
-0.182 0.966 2.435 7
-0.184 0.617 0.667 10
0.192 0.038 -0.814 8
0.173 0.034 -0.732 8
0.563 -0.222 -0.533 9
0.652 0.025 0.304 8
0.669 0.243 0.54 9
0.744 0.155 0.367 8
0.718 0.082 0.378 8
0.569 0.049 0.47 9
0.512 0.044 0.423 8
0.25 -0.062 0.331 9
-0.131 -0.167 0.075 6
-0.443 -0.197 -0.071 10
-0.621 -0.167 0.0 9
-0.685 -0.137 0.056 8
-0.587 -0.157 0.059 8
-0.528 -0.141 0.053 9
-0.375 -0.153 0.066 8
-0.251 -0.148 0.055 9
-0.092 -0.18 0.114 8
-0.04 -0.253 0.228 8
-0.17 -0.351 0.27 9
-0.313 -0.455 0.242 8
-0.282 -0.409 0.217 7
-0.379 -0.447 0.238 10
-0.289 -0.379 0.383 8
0.044 -0.314 0.476 9
0.343 -0.226 0.346 8
0.491 -0.111 0.107 9
0.468 -0.01 -0.113 8
0.421 -0.009 -0.101 8
0.242 0.073 -0.252 9
0.038 0.072 -0.305 8
-0.119 0.035 -0.288 9
-0.152 0.011 -0.229 8
-0.137 0.009 -0.206 7
-0.094 -0.108 -0.049 10
-0.085 -0.097 -0.044 8
-0.131 -0.151 0.035 9
-0.191 -0.264 0.091 8
-0.228 -0.286 0.095 8
-0.185 -0.28 -0.057 9
-0.067 -0.302 -0.094 8
-0.06 -0.271 -0.085 9
0.006 -0.183 -0.076 8
0.004 -0.141 0.178 8
-0.039 -0.176 0.199 9
-0.064 -0.24 0.245 6
-0.062 -0.305 0.471 10
-0.068 -0.328 0.651 9
-0.061 -0.295 0.585 8
-0.058 -0.229 0.502 9
-0.071 -0.009 0.226 8
-0.141 0.248 -0.119 8
-0.223 0.417 -0.449 9
-0.248 0.477 -0.684 8
-0.257 0.426 -0.725 9
-0.232 0.384 -0.653 8
-0.252 0.174 -0.494 8
-0.243 -0.145 -0.318 7
-0.205 -0.424 -0.188 10
-0.253 -0.516 0.003 9
-0.329 -0.492 0.28 8
-0.332 -0.401 0.533 8
-0.299 -0.361 0.479 9
-0.253 -0.259 0.434 8
-0.167 -0.185 0.132 8
-0.052 -0.095 -0.062 9
0.064 -0.024 -0.081 8
0.111 0.074 -0.055 9
0.109 0.181 -0.104 8
0.098 0.163 -0.094 7
0.107 0.245 -0.236 10
0.162 0.315 -0.321 8
0.245 0.346 -0.284 9
0.342 0.337 -0.136 8
0.448 0.308 0.032 8
0.593 0.247 0.124 9
0.534 0.222 0.111 8
0.626 0.202 0.148 9
0.564 0.188 0.152 8
0.376 0.149 0.133 8
0.114 0.138 0.096 9
0.103 0.123 0.019 6
-0.22 0.101 -0.086 11
-0.198 0.091 -0.077 8
-0.219 0.054 -0.081 8
-0.216 0.033 0.01 9
-0.184 0.014 0.07 8
-0.078 -0.001 0.089 9
0.067 0.026 0.048 8
0.176 0.066 -0.017 8
0.159 0.059 -0.016 9
0.174 0.089 -0.012 8
0.15 0.072 0.033 8
0.089 0.076 0.019 7
-0.02 0.113 -0.07 10
-0.181 0.15 -0.162 9
-0.163 0.135 -0.146 8
-0.406 0.164 -0.245 8
-0.629 0.118 -0.277 9
-0.794 0.021 -0.158 8
-0.869 -0.064 0.001 9
-0.77 -0.14 0.112 8
-0.556 -0.197 0.158 8
-0.5 -0.178 0.142 9
-0.253 -0.161 0.151 8
0.005 -0.09 0.123 7
0.199 -0.017 0.038 10
0.357 0.065 -0.02 8
0.487 0.142 -0.002 9
0.543 0.16 0.046 8
0.489 0.144 0.041 9
0.474 0.053 0.124 8
0.431 -0.153 0.529 8
0.492 -0.237 1.122 9
0.65 -0.153 1.106 8
0.755 -0.076 0.548 8
0.749 0.045 0.089 9
0.674 0.04 0.08 7
0.587 0.181 -0.254 10
0.425 0.255 -0.6 8
0.172 0.378 -0.741 9
-0.078 0.481 -0.637 8
-0.246 0.404 -0.486 8
-0.389 0.244 -0.412 9
-0.35 0.22 -0.371 8
-0.495 0.043 -0.291 8
-0.593 -0.116 -0.104 9
-0.599 -0.183 0.041 8
-0.485 -0.202 0.077 9
-0.323 -0.179 0.08 6
-0.156 -0.047 0.103 10
-0.14 -0.042 0.093 9
0.148 0.086 0.102 8
0.478 0.169 0.035 9
0.646 0.27 -0.179 8
0.68 0.332 -0.375 8
0.621 0.344 -0.405 9
0.478 0.3 -0.33 8
0.43 0.27 -0.297 9
0.212 0.175 -0.133 8
-0.04 0.092 0.032 8
-0.219 0.02 0.121 7
-0.306 -0.036 0.175 10
-0.324 -0.096 0.209 9
-0.297 -0.152 0.212 8
-0.267 -0.137 0.19 8
-0.219 -0.157 0.223 9
-0.169 -0.164 0.248 8
-0.144 -0.172 0.233 8
-0.144 -0.166 0.206 9
-0.137 -0.137 0.174 8
-0.123 -0.106 0.137 9
-0.097 -0.095 0.123 8
-0.125 -0.048 0.081 7
-0.208 -0.027 0.045 10
-0.365 -0.042 0.023 8
-0.587 -0.054 0.015 9
-0.746 -0.068 0.008 8
-0.671 -0.061 0.007 8
-0.71 -0.032 0.002 9
-0.567 0.04 0.012 8
-0.295 0.104 0.019 9
-0.069 0.127 0.021 8
0.026 0.117 0.015 8
-0.01 0.105 0.01 9
-0.009 0.095 0.009 6
-0.189 0.078 -0.081 11
-0.449 0.057 -0.281 8
-0.754 0.073 -0.516 8
-1.015 0.078 -0.683 9
-1.083 0.054 -0.566 8
-0.943 0.033 -0.228 8
-0.849 0.029 -0.205 9
-0.609 0.013 0.084 8
-0.376 0.001 0.282 9
-0.222 -0.03 0.35 8
-0.163 -0.068 0.279 8
-0.174 -0.077 0.152 7
-0.283 -0.06 -0.014 10
-0.255 -0.054 -0.013 9
-0.447 -0.018 -0.19 8
-0.597 0.024 -0.267 8
-0.649 0.075 -0.178 9
-0.591 0.114 -0.099 8
-0.464 0.135 -0.092 9
-0.34 0.121 -0.075 8
-0.306 0.109 -0.068 8
-0.29 0.053 -0.033 9
-0.373 -0.002 0.001 8
-0.467 -0.058 -0.008 7
-0.56 -0.106 -0.017 10
-0.598 -0.139 0.069 8
-0.577 -0.154 0.169 9
-0.519 -0.138 0.152 8
-0.451 -0.137 0.201 9
-0.309 -0.108 0.228 8
-0.052 -0.056 0.217 8
0.21 0.006 0.185 9
0.342 0.056 0.153 8
0.316 0.086 0.134 8
0.285 0.078 0.12 9
0.15 0.151 -0.001 7
0.055 0.237 -0.27 10
-0.002 0.343 -0.494 8
-0.034 0.463 -0.599 8
0.025 0.528 -0.581 9
0.123 0.552 -0.427 8
0.111 0.497 -0.384 9
0.165 0.413 -0.204 8
0.088 0.234 -0.072 8
-0.109 0.057 0.032 9
-0.302 -0.106 0.0 8
-0.42 -0.214 -0.164 9
-0.378 -0.192 -0.147 6
-0.426 -0.209 -0.143 10
-0.43 -0.165 0.014 9
# end
#Thu Feb 26 20:30:22 GMT+08:00 20154
