# Supplementary material for: Abnormal Gait Behavior Detection for Elderly Based on Enhanced Wigner-Ville Analysis and Cloud Incremental SVM Learning
Source: Hindawi journal article supplement (doi:10.1155/2016/5869238), 2016-01-01
Supplement: f1 [file 5869238.f1.zip › Supplementary Materials/Original Data/Forward fall Ending lying flat/original__69.txt]

# Accelerometer Values
# filename:  original__69.txt
# Saving start time: Thu Feb 26 20:30:26 GMT+08:00 2015

# sensor resolution: 0.0095825195m/s^2
#Sensorvendor: KIONIX, name: KX023 Accelerometer, type: 1,version : 1, range 39.240005

# X value, Y value, Z value, time diff in ms
0.01 0.02 -0.283 10
0.062 0.027 -0.326 9
0.099 0.0 -0.321 8
0.068 -0.047 -0.29 9
0.062 -0.042 -0.261 8
-0.015 -0.094 -0.197 8
-0.098 -0.149 -0.089 9
-0.182 -0.194 0.008 8
-0.223 -0.215 0.046 9
-0.193 -0.204 0.024 8
-0.133 -0.158 -0.035 8
-0.12 -0.142 -0.032 7
-0.073 -0.082 -0.092 10
-0.066 -0.046 -0.122 9
-0.117 -0.057 -0.107 8
-0.222 -0.092 -0.072 8
-0.315 -0.132 -0.053 9
-0.359 -0.158 -0.032 8
-0.323 -0.142 -0.029 8
-0.326 -0.137 -0.001 9
-0.295 -0.12 -0.018 8
-0.254 -0.084 -0.068 9
-0.198 -0.02 -0.11 8
-0.034 0.038 -0.113 7
0.175 0.063 -0.066 10
0.157 0.057 -0.059 8
0.258 0.037 0.0 9
0.215 -0.023 0.095 8
0.055 -0.081 0.222 8
-0.116 -0.111 0.292 9
-0.21 -0.144 0.262 8
-0.243 -0.159 0.176 9
-0.219 -0.143 0.159 8
-0.22 -0.128 0.055 8
-0.184 -0.101 -0.035 9
-0.116 -0.055 -0.062 6
-0.011 -0.024 -0.04 11
0.106 -0.027 0.027 8
0.127 -0.041 0.101 8
0.115 -0.037 0.091 9
0.046 -0.058 0.145 8
-0.05 -0.077 0.165 9
-0.131 -0.081 0.13 8
-0.167 -0.07 0.088 8
-0.176 -0.059 0.072 9
-0.16 -0.073 0.065 8
-0.144 -0.065 0.059 8
-0.064 -0.084 0.048 7
0.119 -0.072 0.023 10
0.326 -0.04 0.022 9
0.445 -0.026 0.032 8
0.437 -0.046 0.008 8
0.32 -0.056 0.006 9
0.288 -0.05 0.005 8
0.125 -0.041 0.037 9
-0.014 -0.033 0.064 8
-0.073 -0.041 0.078 8
-0.069 -0.058 0.102 9
-0.066 -0.066 0.144 8
-0.06 -0.06 0.129 7
-0.028 -0.061 0.164 10
0.051 -0.062 0.166 8
0.132 -0.062 0.141 9
0.236 -0.059 0.086 8
0.314 -0.055 0.014 9
0.293 -0.05 -0.007 8
0.264 -0.045 -0.006 8
0.185 -0.041 0.075 9
0.112 -0.038 0.218 8
0.074 -0.038 0.314 8
0.063 -0.041 0.342 9
0.066 -0.041 0.338 7
0.122 -0.037 0.257 10
0.11 -0.033 0.231 8
0.203 -0.032 0.087 8
0.272 -0.029 0.008 9
0.287 -0.02 0.033 8
0.243 -0.011 0.094 9
0.181 -0.006 0.1 8
0.142 -0.004 0.033 8
0.127 -0.003 0.03 9
0.103 -0.001 -0.072 8
0.088 0.0 -0.164 9
0.086 0.001 -0.22 6
0.08 0.003 -0.252 10
0.075 0.003 -0.257 9
0.069 0.002 -0.245 8
0.062 0.002 -0.22 9
0.028 -0.002 -0.184 8
-0.02 -0.005 -0.056 8
-0.036 -0.012 0.117 9
-0.015 -0.029 0.259 8
0.009 -0.031 0.351 9
0.02 -0.017 0.365 8
0.018 -0.016 0.328 8
0.003 -0.003 0.276 7
-0.015 0.009 0.15 10
-0.009 0.034 -0.012 8
0.024 0.07 -0.151 9
0.065 0.096 -0.244 8
0.089 0.108 -0.294 9
0.08 0.097 -0.264 8
0.087 0.096 -0.268 8
0.081 0.074 -0.232 9
0.06 0.045 -0.193 8
0.046 0.03 -0.145 9
0.05 0.021 -0.08 8
0.045 0.019 -0.072 7
0.051 0.001 0.018 10
0.043 -0.005 0.163 8
0.031 -0.003 0.304 9
0.038 -0.006 0.381 8
0.071 -0.019 0.385 8
0.123 -0.036 0.333 9
0.111 -0.032 0.3 8
0.147 -0.038 0.21 9
0.138 -0.038 0.094 8
0.068 -0.036 0.004 8
-0.039 -0.037 -0.035 9
-0.131 -0.035 -0.055 6
-0.182 -0.034 -0.091 10
-0.164 -0.03 -0.082 9
-0.181 -0.028 -0.123 8
-0.183 -0.024 -0.147 9
-0.167 -0.024 -0.166 8
-0.108 -0.025 -0.187 8
-0.047 -0.024 -0.203 9
-0.028 -0.02 -0.195 8
-0.025 -0.018 -0.175 9
-0.025 -0.014 -0.158 8
-0.028 -0.011 -0.154 8
-0.027 -0.008 -0.16 7
-0.028 -0.003 -0.154 10
-0.035 0.001 -0.132 9
-0.051 0.003 -0.091 8
-0.046 0.003 -0.082 8
-0.057 0.001 -0.017 9
-0.037 0.0 0.029 8
0.013 -0.003 0.039 9
0.078 -0.008 0.061 8
0.14 -0.009 0.136 8
0.182 -0.009 0.218 9
0.164 -0.008 0.196 8
0.17 -0.01 0.228 7
0.151 -0.017 0.256 10
0.12 -0.019 0.298 8
0.089 -0.022 0.32 9
0.075 -0.019 0.301 8
0.074 -0.012 0.233 8
0.066 -0.011 0.21 9
0.085 -0.005 0.124 8
0.127 -0.002 0.046 9
0.17 0.008 0.011 8
0.195 0.016 0.006 8
0.189 0.021 -0.013 9
0.17 0.019 -0.012 7
0.132 0.029 -0.031 10
0.075 0.038 -0.061 8
0.029 0.041 -0.106 8
0.001 0.034 -0.119 9
-0.002 0.022 -0.099 8
0.007 0.013 -0.079 9
0.009 0.005 -0.051 8
0.008 0.005 -0.046 8
0.008 0.001 -0.021 9
0.026 -0.004 0.006 8
0.061 -0.006 -0.008 9
0.098 -0.007 -0.08 6
0.117 -0.009 -0.153 10
0.105 -0.01 -0.172 9
0.095 -0.009 -0.155 8
0.024 -0.007 -0.117 9
-0.053 -0.011 -0.069 8
-0.138 -0.015 -0.016 8
-0.199 -0.014 -0.017 9
-0.22 -0.012 -0.093 8
-0.198 -0.011 -0.084 8
-0.178 -0.005 -0.154 9
-0.116 0.003 -0.201 8
-0.042 0.008 -0.223 7
0.01 0.006 -0.196 10
0.029 0.002 -0.12 8
0.03 -0.003 -0.012 9
0.027 -0.002 -0.011 8
0.01 -0.002 0.069 9
-0.027 0.005 0.066 8
-0.061 0.016 -0.022 8
-0.065 0.04 -0.12 9
-0.055 0.067 -0.179 8
-0.027 0.078 -0.192 9
-0.025 0.07 -0.173 8
0.031 0.058 -0.135 7
0.09 0.028 -0.066 10
0.135 0.003 0.001 8
0.145 -0.013 0.023 9
0.114 -0.02 0.017 8
0.058 -0.017 0.017 8
0.052 -0.015 0.015 9
-0.015 -0.008 0.027 8
-0.066 -0.011 0.063 8
-0.097 -0.017 0.103 9
-0.113 -0.021 0.147 8
-0.084 -0.024 0.17 9
-0.075 -0.022 0.153 6
0.01 -0.023 0.1 10
0.117 -0.018 -0.028 9
0.242 0.001 -0.17 8
0.475 0.131 -0.185 9
0.53 0.152 -0.216 8
0.27 0.039 -0.254 8
-0.068 0.082 -0.105 9
-0.062 0.073 -0.094 8
-0.382 0.181 0.031 9
-0.672 0.492 0.121 8
-0.845 0.758 0.02 8
-0.787 0.569 -0.32 7
-0.511 0.162 -0.551 10
-0.146 -0.177 -0.57 9
-0.131 -0.16 -0.513 8
0.143 -0.296 -0.345 8
0.368 -0.325 0.009 9
0.597 -0.362 0.379 8
0.796 -0.356 0.585 8
0.891 -0.282 0.624 9
0.851 -0.186 0.564 8
0.766 -0.167 0.507 9
0.619 -0.1 0.493 8
0.447 -0.068 0.507 7
0.292 -0.088 0.479 10
0.199 -0.13 0.498 8
0.334 -0.148 0.528 9
0.301 -0.133 0.339 8
0.29 -0.094 0.305 8
0.041 -0.038 -0.096 9
-0.04 -0.004 -0.438 8
-0.003 0.104 -0.705 9
0.066 0.322 -0.932 8
0.16 0.544 -1.023 8
0.144 0.49 -0.921 9
0.275 0.583 -0.918 7
0.384 0.519 -0.768 10
0.406 0.395 -0.514 8
0.404 0.266 -0.381 8
0.412 0.149 -0.354 9
0.414 0.119 -0.338 8
0.372 0.107 -0.304 9
0.408 0.139 -0.449 8
0.488 0.204 -0.719 8
0.535 0.299 -0.849 9
0.414 0.229 -0.878 8
0.072 -0.031 -0.808 8
0.065 -0.028 -0.727 7
-0.335 -0.251 -0.325 10
-0.597 -0.355 0.238 9
-0.675 -0.36 0.516 8
-0.561 -0.264 0.455 8
-0.283 -0.041 0.422 9
0.099 0.294 0.689 8
0.564 0.427 0.759 9
0.507 0.385 0.683 8
0.874 0.169 0.334 8
0.922 -0.085 0.073 9
0.776 -0.244 0.228 8
0.575 -0.417 0.601 7
0.398 -0.594 0.814 10
0.38 -0.681 0.788 8
0.342 -0.613 0.709 9
0.47 -0.578 0.403 8
0.574 -0.43 -0.199 9
0.52 -0.236 -0.788 8
0.412 -0.053 -0.974 8
0.228 0.085 -0.652 9
-0.01 0.378 -0.113 8
-0.009 0.34 -0.102 8
-0.108 0.443 0.173 9
-0.111 0.118 0.11 7
-0.123 -0.112 0.032 10
-0.148 -0.127 0.026 8
-0.076 -0.096 -0.092 8
-0.069 -0.086 -0.3 9
0.194 -0.077 -0.27 8
0.573 -0.088 -0.391 9
0.841 -0.097 -0.367 8
0.808 -0.121 -0.225 8
0.544 -0.157 -0.064 9
0.201 -0.149 -0.102 8
0.181 -0.134 -0.092 9
-0.127 0.073 -0.24 6
-0.3 0.256 -0.644 10
-0.32 0.175 -1.274 9
-0.177 0.073 -1.672 8
0.081 0.064 -1.924 9
0.253 0.165 -2.059 8
0.228 0.149 -1.853 8
0.261 0.299 -1.794 9
0.261 0.334 -1.713 8
0.258 0.229 -1.762 9
0.298 0.042 -1.801 8
0.345 -0.102 -1.685 8
0.31 -0.092 -1.516 7
0.244 -0.193 -1.276 10
-0.052 -0.358 -1.013 8
-0.418 -0.539 -0.844 9
-0.627 -0.685 -0.821 8
-0.691 -0.798 -0.981 9
-0.565 -0.877 -1.257 8
-0.189 -0.976 -1.467 8
-0.17 -0.878 -1.32 9
0.141 -0.797 -1.414 8
0.34 -0.716 -1.395 9
0.57 -0.862 -1.274 8
0.671 -0.987 -0.906 7
0.642 -1.111 -0.344 10
0.467 -1.174 0.241 8
0.421 -1.057 0.217 9
0.143 -1.051 0.679 8
-0.108 -1.017 0.869 8
-0.26 -0.954 0.807 9
-0.374 -0.885 0.5 8
-0.505 -0.716 0.024 9
-0.518 -0.613 -0.556 8
-0.466 -0.552 -0.5 8
-0.419 -0.575 -1.048 9
-0.426 -0.584 -1.501 6
-0.383 -0.762 -1.91 10
-0.218 -1.117 -2.206 9
-0.005 -1.481 -2.241 8
0.113 -1.762 -2.067 9
0.102 -1.586 -1.861 8
0.121 -1.834 -1.616 8
0.104 -2.102 -1.168 9
0.16 -2.269 -0.504 8
0.324 -2.252 0.332 9
0.486 -2.162 1.168 8
0.438 -1.945 1.782 8
0.478 -1.988 1.604 7
0.194 -2.079 2.093 10
-0.568 -1.908 2.358 9
-1.517 -1.552 2.168 8
-2.063 -1.406 1.343 8
-1.793 -1.349 0.218 9
-1.613 -1.214 0.196 8
-0.19 -1.216 -0.46 9
2.256 -1.413 -0.129 8
4.794 -1.656 1.272 8
6.44 -1.805 3.515 9
6.601 -1.751 6.282 8
5.941 -1.576 5.653 7
4.826 -1.286 8.203 10
3.216 -0.801 9.691 8
2.117 -0.311 10.268 9
2.0 -0.1 10.242 8
2.456 -0.118 9.434 8
3.54 -0.244 7.879 9
4.807 -0.35 5.804 8
4.326 -0.315 5.223 9
4.488 0.014 2.798 8
3.352 0.672 0.058 8
2.138 0.867 -2.49 9
1.78 0.65 -3.805 7
2.087 0.513 -3.279 10
2.7 0.24 -1.141 8
2.43 0.216 -1.027 8
2.577 0.166 1.81 9
2.232 -0.207 4.332 8
2.021 -0.898 6.24 9
1.726 -0.856 7.647 8
1.027 -0.354 7.759 8
0.016 0.116 5.808 9
0.015 0.105 5.227 8
-1.006 0.282 2.174 9
-2.015 0.446 -0.472 6
-2.356 -0.162 -2.241 10
-2.13 -0.988 -3.332 9
-2.066 -0.806 -3.945 8
-1.971 -0.497 -4.453 9
-1.774 -0.448 -4.008 8
-2.024 -0.256 -4.521 8
-2.999 0.092 -4.772 9
-4.471 0.731 -4.345 8
-5.539 1.128 -2.646 9
-5.614 0.888 0.351 8
-5.138 0.639 3.483 8
-4.624 0.575 3.134 7
-3.849 0.798 5.213 10
-2.812 1.455 5.559 8
-1.718 2.599 3.992 9
-0.769 3.956 0.934 8
-0.152 4.888 -2.321 9
0.054 5.163 -4.438 8
0.048 4.647 -3.994 8
0.05 4.066 -4.837 9
0.148 2.552 -4.494 8
0.105 0.753 -3.224 9
-0.244 -0.625 -1.519 8
-0.219 -0.562 -1.367 7
-0.754 -1.436 0.306 10
-1.211 -1.904 0.276 8
-1.543 -1.957 0.947 9
-1.837 -1.688 -0.49 8
-1.826 -1.352 -2.156 8
-1.552 -1.178 -3.238 9
-1.213 -1.391 -3.55 8
-1.092 -1.252 -3.195 9
-0.748 -1.648 -2.837 8
-0.327 -1.796 -2.003 8
0.032 -1.56 -0.805 9
-0.016 -0.96 0.446 6
-0.34 -0.344 1.073 10
-0.872 -0.151 0.897 9
-0.784 -0.136 0.807 8
-1.512 -0.354 0.31 9
-1.878 -0.793 -0.143 8
-1.736 -1.198 -0.516 8
-1.418 -1.32 -0.87 9
-0.878 -1.11 -1.179 8
-0.169 -0.265 -1.14 9
-0.152 -0.238 -1.026 8
0.554 0.858 -0.689 8
1.148 1.523 -0.37 7
1.517 1.712 -0.184 10
1.54 1.729 -0.136 9
1.268 1.769 -0.364 8
0.83 1.775 -0.806 8
0.747 1.597 -0.725 9
0.163 1.516 -1.065 8
-0.212 1.182 -1.017 9
-0.494 0.756 -0.674 8
-0.866 0.438 -0.399 8
-1.257 0.173 -0.269 9
-1.366 0.2 -0.015 8
-1.229 0.18 -0.013 7
-0.905 0.542 0.264 10
-0.612 0.647 0.343 8
-0.373 0.546 0.298 9
-0.137 0.501 0.054 8
0.051 0.199 -0.207 8
-0.019 0.221 -0.045 9
-0.017 0.199 -0.041 8
-0.143 0.387 0.348 9
0.054 -0.114 0.476 8
0.268 -0.841 0.369 8
0.225 -0.988 0.233 9
0.202 -0.889 0.21 7
-0.355 0.286 -0.399 10
-0.319 0.257 -0.359 8
-0.282 0.557 -0.889 8
-0.306 0.688 -0.872 9
-0.499 0.861 -0.213 8
-0.509 0.817 -0.12 9
-0.604 0.476 -0.803 8
-0.543 0.429 -0.722 8
-0.993 0.314 -1.06 9
-1.346 0.488 -0.58 8
-1.441 0.568 0.226 9
-1.285 0.307 0.549 6
-1.028 -0.027 0.432 10
-0.577 -0.173 0.42 9
-0.52 -0.155 0.378 8
0.17 -0.255 0.716 8
0.775 -0.464 1.18 9
1.107 -0.758 1.481 8
1.177 -0.949 1.6 9
0.934 -0.941 1.5 8
0.507 -0.797 1.255 8
0.456 -0.717 1.13 9
0.18 -0.54 0.759 8
0.079 -0.384 0.229 7
0.04 -0.19 -0.264 10
-0.022 0.038 -0.525 8
-0.119 0.145 -0.592 9
-0.181 0.112 -0.619 8
-0.163 0.101 -0.557 9
-0.214 0.061 -0.547 8
-0.244 0.061 -0.497 8
-0.236 0.086 -0.456 9
-0.207 0.126 -0.406 8
-0.16 0.17 -0.347 9
-0.11 0.191 -0.337 8
-0.099 0.172 -0.303 7
-0.092 0.172 -0.365 10
-0.188 0.152 -0.451 8
-0.344 0.104 -0.521 9
-0.463 0.096 -0.562 8
-0.487 0.114 -0.565 8
-0.377 0.09 -0.528 9
-0.339 0.081 -0.475 8
-0.146 0.027 -0.354 8
0.022 -0.064 -0.077 9
0.121 -0.205 0.246 8
0.171 -0.349 0.57 9
0.165 -0.481 0.86 6
0.108 -0.587 0.996 10
0.097 -0.529 0.896 9
-0.013 -0.575 0.873 8
-0.138 -0.513 0.686 9
-0.131 -0.371 0.401 8
-0.021 -0.196 0.163 8
0.069 -0.01 0.034 9
0.175 0.116 -0.04 8
0.157 0.104 -0.036 9
0.242 0.165 -0.149 8
0.224 0.193 -0.3 8
0.119 0.154 -0.429 7
-0.049 0.041 -0.552 10
-0.242 -0.047 -0.647 9
-0.218 -0.042 -0.669 8
-0.337 -0.038 -0.602 8
-0.325 -0.06 -0.557 9
-0.204 0.064 -0.381 8
-0.008 0.138 -0.059 9
0.215 0.034 0.34 8
0.34 -0.175 0.667 8
0.306 -0.157 0.6 9
0.307 -0.43 0.696 8
0.19 -0.6 0.763 7
-0.028 -0.495 0.713 10
-0.186 -0.334 0.422 8
-0.279 -0.202 0.166 9
-0.345 -0.074 -0.003 8
-0.31 -0.066 -0.003 8
-0.404 0.029 -0.134 9
-0.505 0.097 -0.294 8
-0.566 0.107 -0.44 9
-0.653 0.093 -0.494 8
-0.688 0.054 -0.447 8
-0.618 0.006 -0.276 9
-0.556 0.005 -0.248 6
-0.422 -0.037 -0.025 11
-0.24 -0.087 0.135 8
-0.111 -0.094 0.257 8
-0.051 -0.065 0.284 9
0.0 -0.065 0.194 8
0.012 -0.058 0.058 9
0.011 -0.052 0.052 8
-0.02 -0.027 -0.088 8
-0.055 -0.041 -0.198 9
-0.089 -0.077 -0.273 8
-0.122 -0.102 -0.283 8
-0.133 -0.081 -0.239 7
-0.048 -0.013 -0.169 10
-0.043 -0.012 -0.152 9
0.179 0.077 -0.02 8
0.398 0.17 0.124 8
0.508 0.217 0.199 9
0.544 0.212 0.217 8
0.563 0.109 0.216 9
0.53 -0.013 0.204 8
0.477 -0.012 0.184 8
0.389 -0.066 0.169 9
0.275 -0.106 0.157 8
0.157 -0.113 0.139 7
0.084 -0.101 0.093 10
0.046 -0.043 -0.019 8
0.065 0.04 -0.202 9
0.058 0.036 -0.182 8
0.121 0.091 -0.291 9
0.163 0.097 -0.214 8
0.178 0.031 -0.055 8
0.157 -0.067 0.077 9
0.124 -0.115 0.142 8
0.111 -0.104 0.128 9
0.111 -0.093 0.141 8
0.127 -0.049 0.113 7
0.13 0.016 0.083 10
0.132 0.068 0.075 8
0.136 0.062 0.083 8
0.085 -0.026 0.104 9
0.076 -0.023 0.094 8
-0.096 -0.16 0.1 9
-0.371 -0.269 0.087 8
-0.64 -0.303 0.035 8
-0.814 -0.299 0.0 9
-0.875 -0.279 0.026 8
-0.841 -0.232 0.083 9
-0.757 -0.209 0.075 6
-0.716 -0.144 0.102 10
-0.666 -0.083 0.09 9
-0.556 -0.102 0.079 8
-0.472 -0.147 0.07 9
-0.4 -0.184 0.083 8
-0.329 -0.114 0.08 8
-0.296 -0.103 0.072 9
-0.127 -0.016 0.062 8
0.143 0.042 0.075 9
0.371 0.171 0.064 8
0.593 0.223 0.04 8
0.703 0.239 -0.022 7
0.665 0.284 -0.167 10
0.599 0.256 -0.15 8
0.504 0.251 -0.273 9
0.339 0.204 -0.292 8
0.094 0.178 -0.251 9
-0.163 0.157 -0.193 8
-0.389 0.149 -0.104 8
-0.523 0.147 0.0 9
-0.471 0.132 0.0 8
-0.509 0.11 0.072 9
-0.538 0.088 0.106 8
-0.583 0.054 0.117 7
-0.635 -0.004 0.093 10
-0.65 -0.069 0.059 8
-0.662 -0.102 0.029 9
-0.596 -0.092 0.026 8
-0.649 -0.049 -0.035 8
-0.618 0.062 -0.11 9
-0.48 0.198 -0.109 8
-0.324 0.303 -0.054 9
-0.243 0.378 0.004 8
-0.219 0.34 0.004 8
-0.126 0.254 0.003 9
-0.055 0.095 0.425 6
-0.096 0.071 0.357 11
-0.152 0.088 0.061 8
-0.241 0.102 -0.29 8
-0.225 0.003 -0.394 9
-0.203 0.003 -0.355 8
-0.382 0.001 -0.385 8
-0.819 0.242 -0.448 9
-0.873 0.375 -0.421 8
-0.654 0.379 -0.465 9
-0.477 0.394 -0.397 8
-0.27 0.386 -0.147 8
-0.243 0.347 -0.132 7
-0.041 0.322 0.058 10
0.072 0.288 0.092 9
0.09 0.259 -0.03 8
0.08 0.213 -0.173 8
0.018 0.147 -0.268 9
-0.088 0.064 -0.265 8
-0.079 0.058 -0.238 9
-0.124 0.011 -0.027 8
-0.049 0.024 0.228 8
0.166 0.026 0.449 9
0.413 -0.084 0.554 8
0.339 -0.183 0.469 7
-0.009 -0.106 0.353 10
# end
#Thu Feb 26 20:30:31 GMT+08:00 2015 
