# Supplementary material for: Abnormal Gait Behavior Detection for Elderly Based on Enhanced Wigner-Ville Analysis and Cloud Incremental SVM Learning
Source: Hindawi journal article supplement (doi:10.1155/2016/5869238), 2016-01-01
Supplement: f1 [file 5869238.f1.zip › Supplementary Materials/Original Data/Forward fall Ending on the knees/original__51.txt]

# Accelerometer Values
# filename:  original__51.txt
# Saving start time: Thu Feb 26 20:27:01 GMT+08:00 2015

# sensor resolution: 0.0095825195m/s^2
#Sensorvendor: KIONIX, name: KX023 Accelerometer, type: 1,version : 1, range 39.240005

# X value, Y value, Z value, time diff in ms
-0.026 -0.058 -0.047 8
-0.011 -0.048 -0.128 9
-0.01 -0.043 -0.116 8
-0.006 -0.025 -0.173 8
0.03 -0.022 -0.161 9
0.113 -0.032 -0.054 8
0.18 -0.039 0.073 7
0.18 -0.046 0.181 10
0.111 -0.044 0.264 8
0.1 -0.039 0.238 9
-0.001 -0.012 0.254 8
-0.094 0.016 0.172 9
-0.136 0.028 0.042 8
-0.12 0.046 -0.05 8
-0.072 0.056 -0.09 9
-0.008 0.044 -0.088 8
-0.008 0.04 -0.08 9
0.059 0.003 0.011 8
0.108 -0.035 0.161 7
0.109 -0.051 0.256 10
0.046 -0.035 0.282 8
-0.059 0.008 0.256 9
-0.053 0.007 0.23 8
-0.142 0.056 0.136 8
-0.174 0.084 -0.004 9
-0.159 0.076 -0.138 8
-0.146 0.036 -0.212 8
-0.136 -0.009 -0.189 9
-0.089 -0.047 -0.067 8
-0.08 -0.042 -0.06 9
-0.02 -0.069 0.082 6
-0.018 -0.079 0.155 10
-0.086 -0.061 0.144 9
-0.171 -0.024 0.061 8
-0.214 0.01 -0.061 9
-0.206 0.027 -0.15 8
-0.185 0.024 -0.135 8
-0.112 0.027 -0.15 9
0.009 0.028 -0.09 8
0.125 0.022 -0.024 9
0.21 0.013 0.026 8
0.274 0.004 0.073 8
0.247 0.004 0.065 7
0.276 0.002 0.092 10
0.248 0.005 0.121 9
0.17 0.0 0.158 8
0.072 -0.004 0.203 8
-0.016 -0.015 0.233 9
-0.077 -0.027 0.217 8
-0.109 -0.028 0.114 9
-0.098 -0.025 0.103 8
-0.108 -0.007 -0.06 8
-0.094 0.022 -0.218 9
-0.07 0.046 -0.323 8
-0.046 0.048 -0.363 7
-0.052 0.041 -0.359 10
-0.047 0.037 -0.312 8
-0.066 0.033 -0.281 9
-0.066 -0.005 -0.215 8
-0.05 -0.03 -0.163 8
-0.027 -0.042 -0.14 9
-0.015 -0.04 -0.118 8
-0.009 -0.028 -0.081 9
-0.008 -0.025 -0.073 8
0.012 -0.003 -0.035 8
0.041 0.025 0.015 9
0.057 0.033 0.051 7
0.048 0.018 0.052 10
0.027 0.011 0.02 8
0.02 0.004 -0.034 8
0.018 0.004 -0.031 9
0.035 0.004 -0.087 8
0.069 0.013 -0.107 9
0.096 0.018 -0.118 8
0.095 0.029 -0.128 8
0.041 0.038 -0.082 9
-0.045 0.039 0.004 8
-0.041 0.035 0.004 8
-0.084 0.018 0.082 7
-0.07 -0.008 0.102 10
-0.041 -0.022 0.081 9
-0.016 -0.012 0.085 8
0.016 0.006 0.084 8
0.031 0.024 0.049 9
0.028 0.021 0.044 8
-0.005 0.033 0.026 9
-0.049 0.025 0.018 8
-0.058 -0.003 0.019 8
-0.046 -0.043 0.057 9
-0.033 -0.084 0.114 8
-0.029 -0.076 0.102 7
-0.026 -0.101 0.165 10
-0.047 -0.091 0.237 8
-0.06 -0.056 0.276 9
-0.028 -0.003 0.215 8
0.016 0.061 0.073 9
0.056 0.13 -0.095 8
0.051 0.117 -0.086 8
0.086 0.168 -0.223 9
0.101 0.172 -0.275 8
0.083 0.128 -0.254 9
0.044 0.064 -0.133 8
0.017 0.017 0.064 7
0.03 -0.011 0.22 10
0.027 -0.01 0.198 8
0.064 -0.026 0.241 8
0.107 -0.019 0.189 9
0.133 -0.013 0.056 8
0.126 0.002 -0.129 9
0.091 0.012 -0.3 8
0.032 0.008 -0.414 8
0.029 0.007 -0.373 9
-0.034 -0.011 -0.424 8
-0.107 -0.032 -0.385 9
-0.164 -0.039 -0.277 6
-0.168 -0.038 -0.152 10
-0.142 -0.042 -0.043 9
-0.101 -0.051 0.049 8
-0.091 -0.046 0.044 9
-0.023 -0.061 0.137 8
0.038 -0.08 0.194 8
0.065 -0.086 0.18 9
0.047 -0.063 0.115 8
-0.003 -0.006 0.028 9
-0.049 0.049 -0.037 8
-0.044 0.044 -0.033 8
-0.064 0.067 -0.059 7
-0.068 0.057 -0.04 10
-0.06 0.018 0.013 9
-0.04 -0.025 0.07 8
0.007 -0.049 0.143 8
0.006 -0.044 0.129 9
0.082 -0.038 0.184 8
0.138 0.001 0.149 8
0.147 0.045 0.062 9
0.104 0.082 -0.009 8
0.028 0.107 -0.064 9
-0.039 0.093 -0.098 8
-0.035 0.084 -0.088 7
-0.082 0.029 -0.082 10
-0.114 -0.041 -0.04 8
-0.114 -0.091 0.0 9
-0.076 -0.107 0.053 8
0.0 -0.105 0.112 8
0.072 -0.09 0.122 9
0.065 -0.081 0.11 8
0.085 -0.056 0.098 9
0.068 -0.034 0.066 8
0.04 -0.022 0.004 8
0.016 -0.028 -0.058 9
-0.02 -0.051 -0.126 6
-0.067 -0.068 -0.201 11
-0.06 -0.061 -0.181 8
-0.073 -0.049 -0.229 8
-0.029 -0.031 -0.216 9
0.043 -0.02 -0.13 8
0.098 -0.007 -0.022 8
0.127 -0.006 0.074 9
0.13 -0.004 0.179 8
0.117 -0.004 0.161 9
0.099 -0.011 0.228 8
0.049 -0.036 0.23 8
-0.036 -0.065 0.208 7
-0.142 -0.087 0.153 10
-0.215 -0.088 0.114 9
-0.193 -0.079 0.102 8
-0.236 -0.074 0.162 8
-0.286 -0.071 0.261 9
-0.31 -0.092 0.324 8
-0.332 -0.072 0.385 9
-0.279 -0.009 0.316 8
-0.091 0.019 0.169 8
-0.082 0.017 0.152 9
0.129 0.091 0.035 8
0.317 0.208 -0.246 7
0.474 0.253 -0.556 10
0.561 0.146 -0.706 8
0.632 0.058 -0.61 9
0.499 0.035 -0.49 8
0.449 0.031 -0.441 9
0.14 -0.069 -0.4 8
0.004 -0.128 -0.088 8
0.017 -0.126 0.348 9
0.137 -0.143 0.539 8
0.356 -0.201 0.487 8
0.533 -0.299 0.395 9
0.479 -0.269 0.355 7
0.451 -0.365 0.332 10
0.231 -0.419 0.365 8
-0.041 -0.438 0.466 8
-0.271 -0.499 0.599 9
-0.403 -0.596 0.722 8
-0.422 -0.61 0.831 9
-0.38 -0.549 0.748 8
-0.323 -0.604 0.614 8
-0.214 -0.764 0.165 9
-0.127 -0.816 -0.255 8
-0.122 -0.724 -0.39 9
-0.11 -0.652 -0.351 6
-0.121 -0.568 -0.207 10
-0.076 -0.522 0.162 9
0.002 -0.537 0.521 8
0.112 -0.575 0.662 9
0.251 -0.546 0.665 8
0.365 -0.482 0.482 8
0.42 -0.415 0.093 9
0.378 -0.374 0.084 8
0.379 -0.282 -0.204 9
0.339 -0.21 -0.238 8
0.286 -0.301 -0.194 8
0.415 -0.494 -0.142 7
0.465 -0.664 -0.176 10
0.282 -0.812 -0.352 8
0.254 -0.731 -0.316 9
0.267 -0.774 -0.193 8
0.449 -0.733 0.268 9
0.6 -0.726 0.582 8
0.619 -0.788 0.602 8
0.526 -0.87 0.45 9
0.401 -0.965 0.264 8
0.361 -0.869 0.238 9
0.154 -0.953 0.05 8
-0.183 -0.924 0.161 7
-0.578 -0.757 0.89 10
-0.952 -0.555 1.699 8
-1.233 -0.395 2.012 9
-1.32 -0.244 1.987 8
-1.188 -0.22 1.789 8
-1.131 -0.097 1.651 9
-0.934 -0.029 1.473 8
-0.785 0.018 1.201 9
-0.915 0.024 0.737 8
-1.126 0.004 0.461 8
-1.013 0.004 0.415 9
-1.169 0.02 0.373 6
-1.268 0.034 0.465 10
-1.289 0.055 0.502 9
-1.257 0.184 0.532 8
-1.186 0.438 0.344 9
-0.732 0.222 -0.026 8
-0.659 0.2 -0.024 8
0.027 -0.307 -0.359 9
0.398 -0.392 -0.528 8
0.406 -0.308 -0.541 9
0.144 -0.414 -0.496 8
-0.096 -0.464 -0.2 8
-0.086 -0.418 -0.18 7
0.134 -0.344 0.321 10
0.658 -0.495 0.801 9
0.992 -0.654 1.001 8
1.023 -0.608 0.684 8
0.798 -0.51 -0.074 9
0.522 -0.449 -0.908 8
0.406 -0.422 -1.445 9
0.365 -0.38 -1.3 8
0.401 -0.322 -1.528 8
0.522 -0.247 -1.377 9
0.727 -0.241 -0.9 8
0.919 -0.281 -0.414 7
1.025 -0.344 -0.118 10
0.974 -0.369 -0.076 8
0.877 -0.332 -0.068 9
0.754 -0.299 -0.419 8
0.817 -0.253 -0.997 8
1.024 -0.196 -1.535 9
1.064 -0.161 -1.832 8
0.917 -0.205 -1.847 9
0.657 -0.377 -1.654 8
0.591 -0.339 -1.489 8
0.135 -0.521 -1.039 9
-0.393 -0.723 -0.503 7
-0.624 -0.779 -0.026 10
-0.27 -0.485 0.36 8
0.27 -0.389 0.489 8
0.243 -0.35 0.177 9
0.579 -0.343 0.159 8
0.789 -0.232 -0.447 9
0.782 -0.244 -1.003 8
0.583 -0.273 -1.313 8
0.307 -0.388 -1.255 9
0.193 -0.624 -0.881 8
0.174 -0.561 -0.793 9
0.218 -0.778 -0.355 6
0.135 -0.934 -0.039 10
0.143 -1.236 0.135 9
0.308 -1.541 0.242 8
0.449 -1.652 0.245 8
0.647 -1.682 0.01 9
0.583 -1.513 0.009 8
0.737 -1.504 -0.312 9
0.656 -1.393 -0.497 8
0.443 -1.066 -0.553 8
0.214 -0.693 -0.431 9
-0.083 -0.436 -0.121 8
-0.075 -0.393 -0.108 7
-0.554 -0.136 0.353 10
-1.074 0.169 0.864 8
-1.321 0.445 1.354 9
-1.119 0.565 1.906 8
-0.391 0.551 2.515 9
0.678 0.51 3.06 8
1.631 0.494 3.421 8
1.468 0.445 3.079 9
1.968 0.48 3.187 8
1.997 0.612 2.976 9
1.721 0.951 2.595 8
1.229 1.13 2.167 7
0.738 1.143 2.04 10
0.362 1.205 2.264 8
0.325 1.085 2.038 8
0.083 1.054 2.279 9
0.027 0.981 2.455 8
0.093 0.875 2.474 9
0.16 0.825 2.297 8
0.168 0.921 2.043 8
0.151 0.829 1.839 9
0.135 0.998 1.633 8
0.127 1.1 1.514 9
0.122 1.121 1.421 6
0.083 1.075 1.135 10
0.0 0.956 0.499 9
-0.023 0.644 -0.138 8
-0.021 0.58 -0.124 9
0.029 0.206 -0.337 8
0.092 -0.128 -0.351 8
0.161 -0.362 -0.404 9
0.151 -0.291 -0.519 8
0.064 -0.044 -0.654 9
0.018 0.192 -0.647 8
0.016 0.173 -0.583 8
0.103 0.269 -0.491 7
0.268 0.219 -0.307 10
0.436 0.022 0.036 9
0.535 -0.309 0.474 8
0.441 -0.584 0.783 8
0.178 -0.645 0.848 9
0.161 -0.58 0.763 8
-0.081 -0.395 0.548 9
-0.115 -0.116 0.128 8
0.232 0.08 -0.25 8
0.813 0.246 -0.547 9
1.165 0.402 -0.793 8
1.048 0.362 -0.714 7
1.004 0.436 -0.748 10
0.783 0.412 -0.536 8
0.523 0.349 -0.348 9
0.216 0.298 -0.349 8
0.097 0.225 -0.438 8
0.362 0.098 -0.535 9
0.326 0.088 -0.481 8
0.846 -0.097 -0.574 9
1.428 -0.358 -0.607 8
1.819 -0.602 -0.579 8
1.941 -0.664 -0.325 9
1.852 -0.639 0.35 6
1.493 -0.673 1.463 11
1.344 -0.605 1.317 8
1.101 -0.73 2.545 8
1.288 -0.977 3.383 9
1.516 -1.24 3.437 8
1.483 -1.415 2.589 9
1.358 -1.548 1.291 8
1.404 -1.729 0.146 8
1.264 -1.556 0.131 9
1.403 -1.851 -0.538 8
1.305 -2.192 -0.848 8
0.72 -2.429 -1.09 7
-0.27 -2.433 -1.239 10
-1.13 -2.255 -1.301 9
-1.645 -1.792 -1.399 8
-1.48 -1.612 -1.259 8
-1.883 -0.772 -1.561 9
-2.246 0.408 -2.102 8
-2.444 1.113 -3.083 9
-2.546 1.372 -3.973 8
-2.611 1.744 -4.099 8
-2.608 1.896 -3.806 9
-2.347 1.706 -3.425 8
-2.271 1.681 -2.933 7
-1.992 1.623 -2.376 10
-1.431 1.707 -1.866 8
-0.497 1.861 -1.247 9
0.507 1.886 -0.588 8
0.456 1.697 -0.529 9
1.083 1.502 -0.068 8
1.274 1.006 0.1 8
1.131 0.258 0.101 9
0.701 -0.549 0.11 8
0.099 -1.19 0.0 8
-0.576 -1.543 -0.342 9
-0.518 -1.389 -0.307 7
-0.945 -1.589 -0.822 10
-0.723 -1.879 -1.379 8
-0.386 -2.008 -1.648 8
-0.43 -1.857 -1.72 9
-0.566 -1.826 -1.624 8
-0.7 -1.927 -1.098 9
-0.63 -1.734 -0.988 8
-0.766 -1.825 -0.274 8
-0.832 -1.804 0.354 9
-0.71 -1.628 0.952 8
-0.291 -1.368 1.551 9
0.306 -1.091 1.916 6
0.814 -0.808 2.001 10
0.733 -0.727 1.801 9
1.028 -0.454 1.689 8
1.129 -0.199 1.29 9
1.085 0.125 0.84 8
1.003 0.1 0.315 8
1.045 -0.095 0.077 9
1.075 0.0 0.506 8
0.968 0.0 0.455 9
0.912 0.09 1.304 8
0.895 0.068 2.38 8
0.886 -0.021 3.475 7
0.835 -0.061 4.364 10
0.775 -0.086 4.631 8
0.698 -0.077 4.168 9
0.672 -0.027 3.751 8
0.633 0.075 3.073 9
0.548 0.127 1.858 8
0.351 0.262 0.706 8
-0.094 0.368 -0.223 9
-0.687 0.397 -1.067 8
-0.618 0.357 -0.96 9
-1.132 0.412 -1.663 8
-1.586 0.452 -2.237 7
-1.908 0.453 -2.759 10
-1.865 0.307 -2.996 8
-1.731 0.068 -2.87 9
-1.38 0.054 -2.332 8
-1.242 0.049 -2.099 8
-0.558 0.119 -1.381 9
-0.312 0.185 -0.728 8
-0.342 -0.031 -0.203 9
-0.267 -0.408 -0.019 8
-0.298 -0.427 0.012 8
-0.371 -0.332 -0.031 9
-0.334 -0.299 -0.028 6
-0.351 -0.149 -0.152 11
-0.191 0.16 -0.036 8
0.05 0.581 0.284 8
0.213 0.694 0.56 9
0.404 0.415 0.727 8
0.588 0.084 0.823 8
0.529 0.076 0.74 9
0.615 -0.23 0.827 8
0.62 -0.51 0.901 9
0.546 -0.63 0.807 8
0.193 -0.282 0.446 8
0.174 0.126 0.049 7
-0.464 0.253 -0.152 10
-0.418 0.228 -0.137 9
-0.487 0.336 -0.119 8
-0.488 0.383 0.139 8
-0.482 0.28 0.528 9
-0.634 0.115 0.838 8
-0.933 0.029 0.984 9
-0.839 0.026 0.885 8
-1.029 -0.033 0.797 8
-1.026 -0.081 0.56 9
-0.954 -0.08 0.236 8
-0.89 -0.097 0.067 7
-0.844 -0.135 0.124 10
-0.797 -0.157 0.245 8
-0.717 -0.141 0.221 9
-0.703 -0.142 0.157 8
-0.607 -0.085 0.084 8
-0.353 0.056 0.014 9
-0.228 0.223 -0.294 8
-0.314 0.358 -0.749 9
-0.389 0.51 -0.951 8
-0.35 0.459 -0.856 8
-0.364 0.571 -0.695 9
-0.349 0.537 -0.477 7
-0.324 0.413 -0.304 10
-0.304 0.299 -0.196 8
-0.308 0.223 -0.149 8
-0.289 0.146 -0.134 9
-0.26 0.131 -0.121 8
-0.22 0.099 -0.157 9
-0.174 0.13 -0.264 8
-0.054 0.147 -0.367 8
0.167 0.11 -0.367 9
0.406 0.071 -0.243 8
0.508 -0.008 -0.126 9
0.457 -0.007 -0.113 6
0.379 -0.092 -0.049 10
0.29 -0.023 0.051 9
0.144 0.069 0.094 8
-0.12 0.048 0.044 9
-0.388 -0.061 -0.014 8
-0.588 -0.141 -0.097 8
-0.529 -0.126 -0.088 9
-0.693 -0.065 -0.236 8
-0.719 -0.043 -0.327 8
-0.507 -0.172 -0.28 9
-0.278 -0.24 -0.145 8
-0.123 -0.295 -0.005 7
0.0 -0.468 0.04 10
0.0 -0.422 0.036 8
0.059 -0.5 -0.038 9
0.033 -0.361 -0.223 8
-0.04 -0.231 -0.371 9
-0.194 -0.134 -0.349 8
-0.328 -0.105 -0.174 8
-0.295 -0.218 0.025 9
-0.265 -0.196 0.023 8
-0.168 -0.236 0.133 9
-0.074 -0.151 0.17 8
-0.007 -0.06 0.13 7
0.011 0.008 -0.027 10
-0.01 0.059 -0.284 8
-0.009 0.055 -0.479 9
-0.008 0.05 -0.431 8
-0.123 0.01 -0.465 8
-0.194 -0.031 -0.339 9
-0.23 -0.075 -0.105 8
-0.196 -0.104 0.116 9
-0.123 -0.115 0.252 8
-0.11 -0.104 0.227 8
-0.025 -0.101 0.274 9
0.073 -0.071 0.269 6
0.101 -0.037 0.239 10
0.017 -0.04 0.154 9
-0.122 -0.055 0.034 8
-0.253 -0.042 -0.029 9
-0.228 -0.038 -0.026 8
-0.281 -0.005 -0.066 8
-0.246 0.022 -0.113 9
-0.149 0.03 -0.124 8
0.017 0.028 -0.059 9
0.171 0.047 0.074 8
0.245 0.063 0.177 8
0.22 0.056 0.159 7
0.228 0.071 0.197 10
0.186 0.103 0.199 9
0.155 0.159 0.189 8
0.099 0.221 0.182 8
-0.057 0.239 0.17 9
-0.243 0.198 0.15 8
-0.218 0.179 0.135 9
-0.297 0.119 0.154 8
-0.172 0.206 0.345 8
-0.023 0.553 0.367 9
0.285 0.664 -0.065 8
0.792 0.379 -0.546 7
0.923 0.141 -0.561 10
0.83 0.127 -0.505 8
0.331 0.202 -0.23 9
-0.445 0.409 -0.17 8
-0.909 0.42 -0.069 8
-1.064 0.309 0.101 9
-1.005 0.208 0.17 8
-0.637 0.023 0.501 9
-0.573 0.021 0.451 8
-0.1 -0.26 0.88 8
0.239 -0.484 0.975 9
0.375 -0.596 0.715 7
0.42 -0.571 0.252 10
0.464 -0.506 -0.141 8
0.488 -0.433 -0.31 8
0.44 -0.39 -0.279 9
0.385 -0.298 -0.237 8
0.281 -0.271 0.009 9
0.105 -0.336 0.423 8
-0.203 -0.384 0.84 8
-0.51 -0.355 1.053 9
-0.632 -0.438 0.893 8
-0.568 -0.394 0.803 9
-0.596 -0.409 0.322 6
-0.615 -0.228 -0.193 10
-0.608 -0.044 -0.644 9
-0.548 0.03 -0.973 8
-0.455 0.053 -1.1 8
-0.409 0.048 -1.06 9
-0.391 0.043 -0.954 8
-0.457 0.015 -0.704 9
-0.483 -0.091 -0.339 8
-0.431 -0.118 -0.081 8
-0.284 -0.198 0.014 9
-0.088 -0.274 -0.043 8
-0.079 -0.247 -0.038 7
0.016 -0.14 -0.249 10
0.061 -0.017 -0.485 8
0.082 0.047 -0.583 9
0.03 0.085 -0.491 8
-0.057 0.092 -0.272 9
-0.115 0.055 -0.025 8
-0.103 0.049 -0.022 8
-0.129 0.057 0.153 9
-0.095 0.037 0.232 8
0.029 -0.1 0.25 9
0.086 -0.125 0.196 8
0.055 -0.037 0.099 7
0.059 0.043 -0.034 10
0.053 0.038 -0.031 8
0.129 0.15 -0.198 8
0.256 0.271 -0.353 9
0.292 0.354 -0.435 8
0.202 0.37 -0.375 9
0.064 0.316 -0.222 8
-0.028 0.211 -0.053 8
-0.026 0.19 -0.048 9
-0.075 0.168 0.069 8
-0.044 0.176 0.113 9
0.178 0.056 0.106 6
0.428 -0.028 0.049 10
0.484 0.065 0.027 9
0.384 0.111 0.097 8
0.346 0.1 0.087 9
0.17 -0.006 0.211 8
-0.038 -0.115 0.425 8
-0.189 -0.168 0.599 9
-0.259 -0.181 0.543 8
-0.249 -0.177 0.371 9
-0.162 -0.187 0.207 8
-0.146 -0.168 0.186 8
-0.05 -0.184 0.106 7
-0.035 -0.192 0.098 10
-0.086 -0.203 0.155 9
-0.18 -0.179 0.239 8
-0.311 -0.124 0.22 8
-0.427 -0.065 0.12 9
-0.384 -0.058 0.108 8
-0.426 -0.011 0.053 8
-0.402 -0.002 0.042 9
-0.316 -0.048 -0.017 8
-0.199 -0.082 -0.089 9
-0.111 -0.072 -0.112 8
-0.1 -0.064 -0.101 7
0.0 -0.028 -0.18 10
0.072 0.037 -0.301 8
0.08 0.107 -0.33 9
0.054 0.161 -0.289 8
0.027 0.181 -0.25 8
-0.001 0.16 -0.158 9
-0.001 0.144 -0.142 8
-0.042 0.093 -0.128 9
-0.056 0.026 0.094 8
-0.007 -0.027 0.103 8
0.092 -0.044 0.05 9
0.232 -0.028 0.011 6
0.347 0.022 0.028 11
0.312 0.02 0.025 8
0.347 0.062 0.051 8
0.287 0.064 0.088 9
0.135 0.029 0.121 8
-0.038 -0.013 0.137 9
-0.165 -0.028 0.145 8
-0.189 -0.014 0.131 8
-0.17 -0.013 0.118 9
-0.075 0.022 0.085 8
0.109 0.094 -0.009 8
0.308 0.159 -0.159 7
0.4 0.178 -0.258 10
0.313 0.166 -0.287 9
0.137 0.128 -0.261 8
0.123 0.115 -0.235 8
-0.005 0.092 -0.123 9
-0.062 0.091 0.024 8
-0.044 0.082 0.119 9
-0.002 0.079 0.156 8
0.045 0.097 0.162 8
0.131 0.108 0.152 9
0.118 0.097 0.137 8
0.201 0.142 0.063 7
0.27 0.21 -0.092 10
0.304 0.246 -0.189 8
0.265 0.256 -0.219 9
0.183 0.268 -0.215 8
0.088 0.272 -0.147 9
0.079 0.245 -0.133 8
-0.023 0.212 -0.076 8
-0.089 0.175 -0.038 9
-0.076 0.178 0.017 8
0.001 0.204 0.005 8
0.15 0.211 -0.084 9
0.135 0.19 -0.076 7
0.26 0.167 -0.073 10
0.21 0.098 0.042 8
0.062 -0.044 0.141 8
-0.066 -0.145 0.25 9
-0.201 -0.088 0.332 8
-0.314 -0.053 0.197 9
-0.361 -0.093 0.0 8
-0.325 -0.084 0.0 8
-0.327 -0.077 -0.041 9
-0.258 -0.107 -0.045 8
-0.177 -0.209 0.031 9
-0.227 -0.22 0.294 6
-0.396 -0.235 0.476 10
-0.536 -0.363 0.399 9
-0.483 -0.327 0.359 8
-0.567 -0.363 0.195 9
-0.562 -0.279 0.09 8
-0.566 -0.168 0.018 8
-0.671 -0.117 -0.091 9
-0.737 -0.13 -0.175 8
-0.664 -0.142 -0.168 9
-0.659 -0.127 -0.151 8
-0.598 -0.115 -0.098 8
-0.452 -0.052 -0.029 7
-0.251 0.012 0.018 10
-0.1 0.049 0.038 8
-0.035 0.112 0.04 9
-0.032 0.1 0.036 8
-0.037 0.158 -0.001 9
-0.156 0.193 -0.056 8
-0.316 0.234 -0.1 8
-0.394 0.238 -0.127 9
-0.411 0.251 -0.16 8
-0.384 0.264 -0.198 9
-0.345 0.237 -0.178 8
-0.205 0.235 -0.156 7
0.049 0.235 -0.086 10
0.267 0.197 -0.052 8
0.355 0.191 -0.087 9
0.317 0.134 -0.112 8
0.185 0.193 -0.051 8
0.167 0.173 -0.046 9
0.121 0.013 0.128 8
-0.07 -0.258 0.489 9
-0.471 -0.034 0.65 8
-0.501 0.053 0.301 8
-0.188 0.007 -0.061 9
-0.169 0.007 -0.055 6
0.123 0.128 -0.168 11
0.331 0.204 -0.147 8
0.407 0.221 -0.079 8
0.291 0.218 -0.051 9
0.02 0.21 -0.123 8
-0.217 0.193 -0.301 8
-0.323 0.175 -0.385 9
-0.291 0.157 -0.346 8
-0.319 0.123 -0.304 9
-0.27 0.022 -0.21 8
-0.187 -0.1 -0.045 8
-0.118 -0.189 0.103 7
-0.087 -0.256 0.188 10
-0.091 -0.297 0.221 9
-0.082 -0.267 0.199 8
-0.106 -0.277 0.194 8
-0.133 -0.258 0.166 9
# end
#Thu Feb 26 20:27:07 GMT+08:00 2015-
