# Supplementary material for: Abnormal Gait Behavior Detection for Elderly Based on Enhanced Wigner-Ville Analysis and Cloud Incremental SVM Learning
Source: Hindawi journal article supplement (doi:10.1155/2016/5869238), 2016-01-01
Supplement: f1 [file 5869238.f1.zip › Supplementary Materials/Original Data/Forward fall Ending on the knees/original__52.txt]

# Accelerometer Values
# filename:  original__52.txt
# Saving start time: Thu Feb 26 20:27:11 GMT+08:00 2015

# sensor resolution: 0.0095825195m/s^2
#Sensorvendor: KIONIX, name: KX023 Accelerometer, type: 1,version : 1, range 39.240005

# X value, Y value, Z value, time diff in ms
0.049 -0.27 -0.107 9
0.03 -0.253 -0.088 8
-0.009 -0.21 -0.029 9
-0.03 -0.166 -0.003 8
-0.053 -0.123 -0.035 8
-0.118 -0.058 -0.13 9
-0.106 -0.052 -0.117 7
-0.167 0.001 -0.254 10
-0.173 0.039 -0.383 8
-0.117 0.071 -0.463 8
-0.014 0.088 -0.475 9
0.094 0.096 -0.407 8
0.176 0.098 -0.265 9
0.158 0.088 -0.238 8
0.194 0.076 -0.094 8
0.177 0.045 0.013 9
0.139 0.014 0.115 8
0.09 0.017 0.216 9
0.042 0.04 0.272 6
0.031 0.046 0.268 10
0.027 0.041 0.241 9
0.062 0.055 0.21 8
0.111 0.069 0.16 9
0.128 0.057 0.093 8
0.103 0.051 0.057 8
0.057 0.071 0.069 9
0.024 0.051 0.095 8
0.021 0.045 0.085 9
0.012 -0.01 0.129 8
0.012 -0.042 0.19 8
0.008 -0.073 0.229 7
0.016 -0.096 0.213 10
0.052 -0.079 0.161 8
0.082 -0.055 0.086 9
0.074 -0.049 0.077 8
0.078 -0.021 -0.023 9
0.053 0.017 -0.154 8
0.015 0.066 -0.278 8
-0.007 0.11 -0.357 9
-0.015 0.127 -0.413 8
-0.013 0.114 -0.371 9
-0.02 0.11 -0.334 8
-0.028 0.093 -0.288 7
-0.014 0.077 -0.156 10
0.023 0.057 -0.005 8
0.071 0.007 0.155 9
0.095 -0.05 0.296 8
0.086 -0.045 0.266 8
0.064 -0.081 0.358 9
0.035 -0.115 0.402 8
0.036 -0.149 0.394 9
0.046 -0.152 0.319 8
0.047 -0.076 0.189 8
0.052 0.05 0.043 9
0.047 0.045 0.038 6
0.045 0.143 -0.131 10
0.014 0.183 -0.319 9
-0.048 0.179 -0.452 8
-0.134 0.147 -0.481 9
-0.186 0.109 -0.382 8
-0.192 0.051 -0.212 8
-0.173 0.046 -0.191 9
-0.133 -0.048 -0.032 8
-0.07 -0.119 0.081 9
-0.013 -0.109 0.149 8
0.045 -0.072 0.168 8
0.075 -0.038 0.131 7
0.065 0.03 0.06 10
0.059 0.027 0.054 9
0.031 0.104 -0.064 8
0.022 0.145 -0.206 8
0.028 0.136 -0.318 9
0.023 0.093 -0.364 8
-0.005 0.034 -0.31 9
-0.055 -0.029 -0.182 8
-0.05 -0.026 -0.164 8
-0.077 -0.054 -0.026 9
-0.063 -0.039 0.087 8
-0.018 -0.014 0.147 7
0.028 -0.011 0.16 10
0.046 -0.007 0.13 8
0.041 -0.006 0.117 9
0.043 -0.018 0.105 8
0.044 -0.069 0.014 8
0.035 -0.127 0.02 9
0.023 -0.171 0.07 8
0.01 -0.169 0.153 9
-0.017 -0.136 0.243 8
-0.016 -0.122 0.219 8
-0.028 -0.11 0.27 9
-0.009 -0.114 0.262 7
0.017 -0.11 0.187 10
0.037 -0.084 0.074 8
0.053 -0.067 -0.041 8
0.061 -0.099 -0.128 9
0.055 -0.089 -0.115 8
0.054 -0.148 -0.11 9
0.058 -0.204 -0.002 8
0.052 -0.226 0.146 8
0.037 -0.216 0.278 9
0.039 -0.203 0.345 8
0.035 -0.186 0.339 9
0.031 -0.167 0.305 6
0.007 -0.149 0.246 10
-0.033 -0.124 0.133 9
-0.068 -0.095 0.006 8
-0.067 -0.074 -0.087 8
-0.034 -0.065 -0.15 9
-0.007 -0.061 -0.132 8
-0.006 -0.055 -0.119 9
-0.001 -0.029 -0.047 8
0.007 -0.015 -0.015 8
0.02 -0.023 -0.017 9
0.012 -0.022 0.033 8
-0.001 -0.03 0.131 7
0.006 -0.056 0.204 10
0.005 -0.051 0.184 8
0.035 -0.074 0.21 9
0.069 -0.079 0.16 8
0.092 -0.057 0.036 9
0.123 0.001 -0.126 8
0.156 0.09 -0.276 8
0.159 0.17 -0.367 9
0.143 0.153 -0.33 8
0.123 0.189 -0.339 9
0.094 0.163 -0.246 8
0.088 0.103 -0.146 7
0.12 0.021 -0.114 10
0.155 -0.049 -0.099 8
0.14 -0.044 -0.089 8
0.138 -0.075 -0.077 9
0.11 -0.094 -0.05 8
0.083 -0.094 0.015 9
0.049 -0.095 0.102 8
-0.009 -0.1 0.164 8
-0.067 -0.104 0.181 9
-0.06 -0.093 0.163 8
-0.04 -0.095 0.12 9
0.058 -0.089 0.018 6
0.165 -0.086 -0.098 10
0.219 -0.086 -0.22 9
0.274 -0.023 -0.208 8
0.221 -0.017 -0.191 9
0.199 -0.015 -0.172 8
-0.014 -0.236 -0.31 8
-0.184 -0.317 -0.315 9
-0.215 -0.178 -0.061 8
0.045 -0.309 0.243 9
0.18 -0.411 0.365 8
0.02 -0.23 0.334 8
0.018 -0.207 0.301 7
0.073 -0.164 0.364 10
0.297 -0.204 0.533 9
0.452 -0.182 0.558 8
0.577 -0.227 0.404 8
0.714 -0.382 0.063 9
0.816 -0.572 -0.481 8
0.735 -0.515 -0.433 9
0.903 -0.828 -0.925 8
1.016 -0.929 -0.755 8
0.851 -0.7 -0.115 9
0.516 -0.554 0.209 8
0.465 -0.498 0.188 7
0.196 -0.52 0.123 10
0.177 -0.468 0.111 8
0.237 -0.474 -0.168 9
0.294 -0.498 -0.421 8
0.28 -0.548 -0.396 8
0.153 -0.577 -0.157 9
-0.058 -0.615 0.052 8
-0.052 -0.553 0.047 9
-0.162 -0.605 0.15 8
-0.074 -0.662 0.032 8
0.178 -0.701 -0.282 9
0.527 -0.629 -0.503 6
0.646 -0.454 -0.473 11
0.356 -0.234 -0.206 8
0.32 -0.21 -0.185 8
-0.044 -0.021 0.046 9
-0.276 0.0 -0.03 8
-0.346 -0.117 -0.449 9
-0.212 -0.091 -0.926 8
-0.01 0.202 -1.208 8
0.086 0.669 -1.388 9
0.078 0.602 -1.249 8
-0.099 1.157 -1.307 8
-0.478 1.549 -1.129 7
-1.024 1.705 -1.031 10
-1.656 1.764 -1.128 9
-2.026 1.736 -0.986 8
-2.012 1.494 -0.641 8
-1.811 1.344 -0.577 9
-1.253 0.762 -0.048 8
-0.527 0.155 0.552 9
-0.331 0.008 0.829 8
-0.493 0.098 0.775 8
-0.612 0.034 0.581 9
-0.545 -0.128 0.492 8
-0.491 -0.115 0.443 7
-0.135 -0.202 0.463 10
0.434 -0.257 0.441 8
0.928 -0.388 0.384 9
1.093 -0.635 0.319 8
0.952 -1.013 0.174 9
0.857 -0.912 0.156 8
0.653 -1.09 -0.134 8
0.42 -0.739 -0.492 9
0.125 -0.106 -0.709 8
-0.036 0.303 -0.829 8
0.134 0.242 -0.887 9
0.12 0.217 -0.798 7
0.515 -0.116 -0.725 10
0.905 -0.494 -0.537 8
1.16 -0.839 -0.375 8
1.265 -1.075 -0.316 9
1.144 -1.15 -0.335 8
0.804 -1.02 -0.537 9
0.367 -0.814 -1.014 8
0.33 -0.733 -0.913 8
-0.117 -0.515 -1.438 9
-0.327 -0.231 -1.837 8
-0.472 -0.136 -2.051 9
-0.881 0.134 -1.909 6
-1.411 0.679 -1.608 10
-1.74 0.991 -1.435 9
-1.566 0.892 -1.291 8
-1.412 0.977 -1.469 9
-0.897 0.862 -1.929 8
-0.387 0.635 -2.242 8
-0.104 0.509 -2.154 9
-0.109 0.512 -1.661 8
-0.401 0.581 -0.992 9
-0.361 0.523 -0.893 8
-0.972 0.926 -0.138 8
-1.77 1.842 0.957 7
-2.167 2.861 2.372 10
-1.548 3.363 3.893 8
-0.207 3.248 5.509 9
-0.186 2.923 4.958 8
1.23 2.545 6.407 9
2.366 2.064 7.239 8
2.916 1.694 7.355 8
2.663 1.642 6.579 9
1.763 1.983 4.944 8
0.728 2.459 2.849 9
0.655 2.213 2.564 8
-0.112 2.513 0.497 7
-0.46 2.58 -1.19 10
-0.232 2.411 -2.296 8
0.611 1.868 -2.921 9
1.632 1.119 -3.182 8
2.324 0.603 -3.14 8
2.092 0.543 -2.826 9
2.526 0.337 -2.627 8
2.589 0.368 -2.236 9
2.04 0.595 -1.751 8
1.279 0.923 -1.358 8
0.725 1.093 -1.106 9
0.653 0.984 -0.995 6
0.297 0.83 -0.931 11
0.006 0.519 -1.025 8
-0.155 0.085 -1.14 8
-0.093 -0.47 -1.099 9
0.057 -0.974 -0.823 8
0.084 -1.266 -0.322 8
-0.082 -1.291 0.344 9
-0.074 -1.161 0.309 8
-0.33 -1.023 0.995 9
-0.498 -0.818 1.52 8
-0.35 -0.713 1.936 8
0.164 -0.636 2.413 7
0.883 -0.458 2.793 10
1.568 -0.063 3.023 9
1.412 -0.057 2.721 8
1.815 0.666 3.06 8
1.928 1.508 3.451 9
2.094 2.005 3.626 8
2.284 1.899 3.598 9
2.055 1.271 3.712 8
1.849 1.144 3.341 8
1.31 0.159 3.512 9
0.752 -1.005 3.503 8
0.321 -2.194 3.322 7
0.033 -3.202 2.826 10
-0.254 -3.881 1.966 8
-0.576 -4.233 0.847 9
-0.518 -3.81 0.762 8
-0.824 -3.898 -0.449 9
-1.082 -3.767 -1.663 8
-1.359 -3.524 -2.696 8
-1.575 -3.201 -3.185 9
-1.547 -2.856 -2.978 8
-1.241 -2.505 -2.415 8
-1.117 -2.254 -2.174 9
-0.595 -1.885 -1.565 7
0.062 -1.53 -1.083 10
0.633 -1.245 -0.995 8
1.003 -0.97 -1.382 8
1.196 -0.724 -2.127 9
1.072 -0.569 -2.93 8
0.965 -0.512 -2.637 9
0.452 -0.379 -3.297 8
-0.309 -0.256 -3.609 8
-1.123 -0.186 -3.335 9
-1.75 -0.175 -2.495 8
-1.906 -0.214 -1.317 9
-1.715 -0.193 -1.185 6
-1.38 -0.251 0.048 10
-0.728 -0.333 1.012 9
-0.082 -0.427 1.484 8
0.296 -0.452 1.388 9
0.333 -0.389 0.887 8
0.108 -0.302 0.219 8
-0.277 -0.232 -0.37 9
-0.249 -0.208 -0.333 8
-0.656 -0.175 -0.595 8
-0.954 -0.209 -0.573 9
-0.953 -0.345 -0.433 8
-0.593 -0.533 -0.139 7
-0.191 -0.685 0.292 10
-0.172 -0.616 0.263 8
0.049 -0.742 0.771 9
0.062 -0.786 1.349 8
-0.112 -0.692 1.93 9
-0.209 -0.528 2.544 8
0.013 -0.359 3.139 8
0.457 -0.252 3.428 9
0.411 -0.227 3.085 8
0.867 -0.126 3.057 9
1.161 0.044 2.778 8
1.282 0.218 2.23 7
1.285 0.365 1.494 10
1.198 0.465 0.802 8
1.075 0.529 0.302 9
0.967 0.476 0.272 8
0.862 0.542 0.056 8
0.781 0.508 0.057 9
0.737 0.384 0.097 8
0.679 0.266 0.105 9
0.534 0.172 -0.025 8
0.217 0.093 -0.48 8
0.195 0.084 -0.432 9
-0.232 0.011 -1.09 6
-0.648 -0.047 -1.7 10
-1.068 -0.049 -2.083 9
-1.372 0.012 -1.962 8
-1.506 0.06 -1.452 9
-1.5 0.072 -0.831 8
-1.35 0.065 -0.748 8
-1.189 0.081 -0.211 9
-0.903 0.086 0.136 8
-0.592 0.048 0.281 9
-0.366 -0.001 0.26 8
-0.36 0.007 0.23 8
-0.324 0.006 0.207 7
-0.475 0.07 0.255 10
-0.576 0.111 0.361 9
-0.608 0.1 0.43 8
-0.605 0.042 0.434 8
-0.573 -0.036 0.351 9
-0.521 -0.105 0.167 8
-0.469 -0.095 0.151 9
-0.446 -0.118 -0.109 8
-0.475 -0.064 -0.398 8
-0.476 0.014 -0.617 9
-0.43 0.064 -0.758 8
-0.418 0.095 -0.841 7
-0.39 0.12 -0.925 10
-0.351 0.108 -0.832 8
-0.275 0.124 -1.055 9
-0.199 0.133 -1.332 8
-0.146 0.14 -1.428 8
-0.103 0.146 -1.196 9
-0.091 0.13 -0.671 8
-0.19 0.102 0.003 9
-0.171 0.092 0.002 8
-0.37 0.059 0.602 8
-0.501 -0.052 0.997 9
-0.521 -0.152 1.186 7
-0.461 -0.164 1.074 10
-0.33 -0.169 0.787 8
-0.181 -0.153 0.57 8
-0.163 -0.138 0.513 9
-0.002 -0.079 0.415 8
0.147 -0.066 0.443 9
0.223 -0.073 0.521 8
0.222 -0.038 0.489 8
0.173 -0.043 0.35 9
0.086 -0.06 0.2 8
0.077 -0.054 0.18 9
0.01 -0.06 0.052 6
-0.053 -0.066 -0.036 10
-0.142 -0.057 -0.047 9
-0.203 -0.031 -0.004 8
-0.237 -0.058 0.051 8
-0.213 -0.053 0.045 9
-0.237 -0.126 0.077 8
-0.226 -0.168 0.071 9
-0.175 -0.172 0.052 8
-0.11 -0.161 0.044 8
-0.031 -0.152 0.052 9
0.06 -0.158 0.071 8
0.054 -0.142 0.064 7
0.113 -0.16 0.108 10
0.093 -0.172 0.172 8
0.0 -0.146 0.219 9
-0.084 -0.095 0.221 8
-0.061 -0.083 0.166 9
0.045 -0.106 0.084 8
0.04 -0.095 0.076 8
0.118 -0.096 0.007 9
0.086 -0.086 -0.049 8
-0.023 -0.087 -0.093 9
-0.118 -0.11 -0.097 8
-0.17 -0.165 -0.056 7
-0.189 -0.198 -0.009 10
-0.17 -0.178 -0.008 8
-0.103 -0.141 -0.013 9
0.04 -0.076 -0.076 8
0.138 -0.004 -0.197 8
0.163 0.076 -0.388 9
0.165 0.128 -0.577 8
0.151 0.158 -0.683 8
0.136 0.142 -0.615 9
0.093 0.151 -0.586 8
0.055 0.119 -0.358 9
0.078 0.042 -0.036 6
0.147 -0.044 0.25 10
0.212 -0.085 0.462 9
0.238 -0.063 0.54 8
0.214 -0.056 0.486 9
0.192 0.001 0.406 8
0.122 0.047 0.27 8
0.054 0.079 0.19 9
0.051 0.088 0.167 8
0.087 0.059 0.147 9
0.078 0.053 0.132 8
0.097 0.0 0.092 8
0.095 -0.041 0.057 7
0.087 -0.045 0.029 10
0.079 -0.017 0.013 9
0.073 0.012 -0.004 8
0.052 0.039 -0.039 8
0.047 0.035 -0.035 9
0.001 0.067 -0.107 8
-0.029 0.082 -0.173 9
-0.02 0.075 -0.176 8
0.013 0.065 -0.118 8
0.043 0.052 -0.047 9
0.051 0.053 -0.015 8
0.046 0.048 -0.013 7
0.043 0.058 -0.049 10
0.016 0.074 -0.184 8
-0.06 0.095 -0.336 9
-0.154 0.103 -0.398 8
-0.181 0.086 -0.357 8
-0.112 0.053 -0.21 9
-0.101 0.047 -0.189 8
-0.002 0.015 -0.002 9
0.079 0.011 0.126 8
0.167 0.03 0.171 8
0.225 0.042 0.165 9
0.201 0.066 0.142 6
0.134 0.088 0.124 11
0.121 0.08 0.112 8
0.058 0.069 0.115 8
0.016 0.027 0.134 9
0.002 -0.035 0.151 8
0.0 -0.108 0.151 9
-0.01 -0.144 0.164 8
-0.017 -0.142 0.183 8
-0.015 -0.128 0.165 9
-0.015 -0.112 0.156 8
-0.005 -0.08 0.123 8
0.012 -0.049 0.085 7
0.019 -0.024 0.041 10
0.018 0.002 -0.003 9
0.001 0.031 -0.041 8
0.001 0.028 -0.037 8
-0.03 0.051 -0.045 9
-0.052 0.066 -0.019 8
-0.022 0.095 0.018 9
0.116 0.102 0.063 8
0.325 0.084 0.127 8
0.293 0.076 0.114 9
0.436 0.063 0.213 8
0.497 0.035 0.345 7
0.573 -0.011 0.478 10
0.672 -0.076 0.57 8
0.743 -0.151 0.626 9
0.764 -0.254 0.663 8
0.688 -0.229 0.596 9
0.681 -0.339 0.677 8
0.669 -0.416 0.79 8
0.673 -0.473 0.843 9
0.737 -0.531 0.809 8
0.88 -0.605 0.647 8
1.016 -0.664 0.419 9
0.915 -0.598 0.377 7
0.945 -0.601 0.189 10
0.821 -0.551 -0.005 8
0.619 -0.492 -0.177 8
0.451 -0.494 -0.222 9
0.423 -0.621 -0.166 8
0.538 -0.814 -0.117 9
0.484 -0.733 -0.105 8
0.582 -0.88 -0.114 8
0.49 -1.025 -0.231 9
0.251 -1.175 -0.477 8
-0.03 -1.21 -0.877 9
-0.33 -1.147 -1.349 6
-0.653 -1.028 -1.795 10
-0.588 -0.925 -1.615 9
-0.874 -0.794 -1.96 8
-0.97 -0.712 -2.048 9
-0.874 -0.721 -1.841 8
-0.696 -0.764 -1.447 8
-0.522 -0.765 -1.1 9
-0.412 -0.637 -0.943 8
-0.371 -0.573 -0.849 9
-0.33 -0.312 -0.943 8
-0.355 -0.045 -1.191 8
-0.467 0.172 -1.454 7
-0.597 0.411 -1.58 10
-0.666 0.667 -1.462 8
-0.638 0.885 -1.084 9
-0.575 0.796 -0.976 8
-0.381 0.95 -0.386 9
-0.058 1.093 0.214 8
0.263 1.27 0.671 8
0.553 1.4 1.024 9
0.831 1.419 1.276 8
0.748 1.277 1.149 9
0.993 1.146 1.417 8
1.093 0.916 1.743 7
0.976 0.692 2.162 10
0.715 0.482 2.64 8
0.573 0.001 3.002 9
0.479 -0.555 3.032 8
0.431 -0.5 2.729 8
0.232 -0.743 2.27 9
0.13 -0.885 1.479 8
0.153 -0.956 0.802 9
0.329 -0.967 0.684 8
0.615 -0.938 1.11 8
0.792 -0.81 1.483 9
0.713 -0.729 1.335 6
0.807 -0.8 1.493 11
0.628 -0.725 1.541 8
0.114 -0.216 1.282 8
-0.284 0.26 0.677 9
-0.225 0.559 -0.074 8
0.212 0.711 -0.614 8
0.191 0.64 -0.553 9
0.671 0.709 -0.554 8
0.863 0.885 -0.303 9
0.86 1.017 -0.011 8
0.73 0.983 0.304 8
0.315 1.087 0.248 7
-0.115 1.185 -0.209 10
-0.104 1.067 -0.188 9
-0.336 1.029 -0.858 8
-0.449 0.924 -1.367 8
-0.465 0.651 -1.241 9
-0.246 0.222 -0.613 8
0.117 -0.3 0.037 9
0.537 -1.058 0.505 8
0.483 -0.952 0.455 8
0.572 -1.577 0.575 9
-0.126 -1.531 0.383 8
-1.191 -1.163 0.115 7
-2.021 -0.773 -0.186 10
-2.46 -0.37 -0.633 8
-2.214 -0.333 -0.57 9
-2.302 0.005 -1.153 8
-1.975 0.265 -1.597 9
-1.349 0.362 -1.795 8
-0.874 0.628 -1.773 8
-0.38 0.784 -1.848 9
0.397 0.816 -2.054 8
0.357 0.735 -1.849 8
0.971 1.037 -1.967 9
1.16 1.366 -1.967 7
0.968 1.481 -1.936 10
0.636 1.198 -1.851 8
0.339 0.979 -1.23 8
0.129 1.103 -0.022 9
0.116 0.993 -0.02 8
0.041 1.161 1.229 9
0.224 1.008 2.054 8
0.541 0.679 2.301 8
0.639 0.5 2.088 9
0.422 0.35 1.6 8
0.107 0.193 1.037 9
0.096 0.173 0.934 6
-0.13 0.046 0.476 10
-0.323 -0.191 0.132 9
-0.549 -0.452 -0.29 8
-0.652 -0.462 -0.504 9
-0.503 -0.239 -0.139 8
-0.244 -0.008 0.562 8
-0.219 -0.007 0.506 9
0.036 0.103 0.989 8
0.344 0.024 1.023 8
0.775 -0.343 0.979 9
1.225 -0.945 0.837 8
1.102 -0.85 0.753 7
1.803 -1.789 0.316 10
1.623 -1.61 0.284 8
1.59 -1.6 -0.059 9
1.195 -1.203 -0.441 8
0.458 -0.595 -0.711 9
-0.341 -0.21 -0.942 8
-1.029 -0.156 -1.129 8
-0.926 -0.14 -1.016 9
-1.592 -0.126 -1.126 8
-2.056 0.0 -1.165 9
-2.144 0.121 -1.253 8
-1.885 0.213 -1.437 7
-1.477 0.291 -1.643 10
-1.142 0.3 -1.608 8
-1.027 0.27 -1.447 9
-0.87 0.189 -1.346 8
-0.811 0.079 -1.312 8
-0.841 0.001 -1.178 9
-0.937 -0.132 -1.051 8
-0.957 -0.445 -0.986 9
-0.974 -0.536 -0.85 8
-0.877 -0.483 -0.765 8
-0.975 -0.117 -0.621 9
-0.988 0.387 -0.385 6
-0.776 0.807 -0.022 10
-0.329 0.999 0.259 9
0.194 0.879 0.436 8
0.556 0.594 0.436 9
0.5 0.535 0.392 8
0.599 0.395 0.253 8
0.537 0.375 0.143 9
0.459 0.337 0.163 8
0.37 0.318 0.304 9
0.268 0.295 0.495 8
0.28 0.206 0.678 8
0.252 0.185 0.61 7
0.309 0.047 0.766 10
0.308 -0.058 0.866 9
0.289 -0.071 0.857 8
0.153 0.042 0.642 8
0.064 0.102 0.466 9
0.057 0.115 0.382 8
0.006 0.103 0.344 9
-0.164 0.168 0.294 8
-0.382 0.171 0.352 8
-0.556 0.133 0.425 9
-0.53 0.094 0.476 8
-0.477 0.085 0.428 7
-0.31 0.069 0.515 10
-0.151 0.145 0.637 8
-0.02 0.238 0.643 9
0.005 0.269 0.589 8
-0.23 0.271 0.571 8
-0.601 0.262 0.447 9
-0.87 0.252 0.163 8
-0.783 0.227 0.147 9
-0.895 0.224 -0.222 8
-0.84 0.254 -0.606 8
-0.685 0.324 -0.923 9
-0.487 0.367 -1.085 7
-0.183 0.313 -0.976 10
0.107 0.217 -0.704 8
0.096 0.195 -0.633 8
0.118 0.128 -0.403 9
-0.09 0.07 -0.242 8
-0.341 0.022 -0.104 9
-0.536 -0.016 0.018 8
-0.636 -0.056 0.145 8
-0.577 -0.074 0.172 9
-0.52 -0.067 0.154 8
-0.256 -0.06 0.045 8
0.171 -0.046 -0.036 7
0.56 -0.041 -0.181 10
0.695 -0.041 -0.484 9
0.579 -0.027 -0.843 8
0.284 -0.007 -1.133 8
0.256 -0.006 -1.02 9
-0.09 0.015 -1.166 8
-0.367 0.034 -1.173 9
-0.499 0.033 -1.089 8
-0.473 0.05 -0.995 8
-0.364 0.238 -0.91 9
-0.328 0.214 -0.819 8
-0.064 0.414 -0.677 7
0.307 0.366 -0.479 10
0.509 0.268 -0.195 8
0.454 0.254 0.014 9
0.277 0.24 -0.106 8
0.127 0.137 -0.353 9
0.114 0.123 -0.318 8
-0.021 -0.026 -0.489 8
-0.244 0.055 -0.645 9
-0.492 0.369 -0.778 8
-0.639 0.626 -0.848 9
-0.601 0.686 -0.712 8
-0.541 0.617 -0.641 7
-0.365 0.48 -0.257 10
-0.216 0.379 0.198 8
-0.157 0.351 0.555 9
-0.162 0.214 0.649 8
-0.23 0.081 0.599 8
-0.371 0.045 0.644 9
-0.568 0.047 0.711 8
-0.511 0.042 0.64 8
-0.588 0.055 0.644 9
-0.45 0.031 0.589 8
-0.207 -0.018 0.505 9
0.013 0.002 0.458 6
0.127 0.12 0.45 10
0.123 0.22 0.431 9
0.11 0.198 0.387 8
0.008 0.211 0.358 9
-0.127 0.197 0.315 8
-0.21 0.149 0.277 8
-0.256 0.048 0.293 9
-0.303 -0.035 0.392 8
-0.273 -0.032 0.353 9
-0.268 -0.069 0.472 8
-0.154 -0.106 0.48 8
-0.04 -0.098 0.409 7
-0.009 -0.042 0.436 10
-0.056 -0.005 0.389 8
-0.166 0.048 0.2 9
-0.149 0.043 0.18 8
-0.258 0.141 0.041 9
-0.29 0.213 -0.089 8
-0.325 0.195 -0.339 8
-0.391 0.082 -0.48 9
-0.396 -0.059 -0.353 8
-0.378 -0.179 -0.151 9
-0.34 -0.161 -0.136 8
-0.343 -0.169 0.093 7
-0.342 -0.069 0.249 10
-0.288 0.014 0.25 8
-0.179 -0.012 0.2 9
-0.165 0.035 0.128 8
-0.228 0.118 0.007 8
-0.205 0.106 0.007 9
-0.217 0.062 -0.07 8
-0.213 0.072 -0.071 9
-0.193 0.073 -0.051 8
-0.136 0.055 -0.018 8
-0.112 0.102 0.031 9
-0.101 0.092 0.028 6
-0.122 0.146 0.066 11
-0.111 0.142 0.121 8
-0.073 0.126 0.205 8
-0.012 0.109 0.387 9
0.016 0.082 0.623 8
# end
#Thu Feb 26 20:27:18 GMT+08:00 20152
