# Supplementary material for: Abnormal Gait Behavior Detection for Elderly Based on Enhanced Wigner-Ville Analysis and Cloud Incremental SVM Learning
Source: Hindawi journal article supplement (doi:10.1155/2016/5869238), 2016-01-01
Supplement: f1 [file 5869238.f1.zip › Supplementary Materials/Original Data/Forward fall Ending on the knees/original__53.txt]

# Accelerometer Values
# filename:  original__53.txt
# Saving start time: Thu Feb 26 20:27:23 GMT+08:00 2015

# sensor resolution: 0.0095825195m/s^2
#Sensorvendor: KIONIX, name: KX023 Accelerometer, type: 1,version : 1, range 39.240005

# X value, Y value, Z value, time diff in ms
0.024 -0.01 0.19 9
0.019 0.047 0.162 8
0.017 0.042 0.146 9
0.023 0.071 0.116 8
0.035 0.09 0.096 8
0.06 0.093 0.086 9
0.066 0.08 0.079 8
0.042 0.058 0.059 9
0.016 0.014 0.042 8
0.015 0.013 0.038 8
-0.003 -0.02 0.043 7
0.01 -0.025 0.055 10
0.07 -0.011 0.05 9
0.115 0.026 0.019 8
0.12 0.057 -0.022 8
0.126 0.084 -0.039 9
0.114 0.076 -0.035 8
0.142 0.118 -0.014 9
0.17 0.118 -0.013 8
0.134 0.078 -0.02 8
0.026 0.074 0.024 9
-0.061 0.087 0.062 8
-0.055 0.079 0.055 7
-0.092 0.064 0.038 10
-0.089 0.029 0.0 8
-0.033 -0.014 -0.038 9
0.051 -0.028 -0.078 8
0.115 -0.001 -0.126 8
0.124 -0.004 -0.17 9
0.112 -0.004 -0.153 8
0.071 -0.034 -0.174 9
0.029 -0.029 -0.165 8
-0.012 -0.021 -0.148 8
-0.074 -0.013 -0.144 9
-0.119 -0.003 -0.134 7
-0.12 -0.018 -0.126 10
-0.108 -0.016 -0.113 8
-0.088 -0.046 -0.098 8
-0.055 -0.077 -0.079 9
-0.011 -0.07 -0.09 8
0.025 -0.058 -0.124 9
0.063 -0.05 -0.125 8
0.095 -0.014 -0.065 8
0.086 -0.013 -0.058 9
0.1 0.027 0.011 8
0.105 0.046 0.057 9
0.09 0.039 0.09 6
0.032 0.04 0.129 10
-0.039 0.046 0.151 9
-0.078 0.018 0.153 8
-0.07 0.016 0.138 8
-0.057 -0.058 0.119 9
-0.012 -0.117 0.094 8
0.001 -0.094 0.08 9
-0.035 -0.025 0.052 8
-0.072 0.038 0.009 8
-0.09 0.101 -0.045 9
-0.081 0.09 -0.041 8
-0.08 0.15 -0.104 7
-0.064 0.184 -0.184 10
-0.058 0.179 -0.241 8
-0.064 0.145 -0.212 9
-0.073 0.104 -0.117 8
-0.065 0.093 -0.105 9
-0.05 0.055 0.0 8
-0.017 0.016 0.082 8
0.002 -0.003 0.156 9
0.014 0.018 0.236 8
0.046 0.055 0.287 9
0.077 0.069 0.282 8
0.069 0.062 0.253 7
0.054 0.049 0.203 10
0.009 0.029 0.12 8
-0.033 0.017 0.012 9
-0.064 0.004 -0.095 8
-0.072 -0.037 -0.175 8
-0.049 -0.09 -0.185 9
-0.044 -0.081 -0.166 8
-0.012 -0.114 -0.095 8
0.012 -0.127 0.005 9
0.014 -0.111 0.102 8
0.005 -0.07 0.155 9
-0.004 -0.03 0.13 6
-0.018 -0.011 0.026 10
-0.016 -0.01 0.024 9
-0.037 -0.009 -0.13 8
-0.048 -0.034 -0.278 9
-0.048 -0.088 -0.378 8
-0.037 -0.138 -0.403 8
-0.015 -0.17 -0.33 9
0.0 -0.166 -0.187 8
0.0 -0.15 -0.168 9
0.0 -0.102 -0.053 8
-0.008 -0.039 0.003 8
-0.031 0.033 0.006 7
-0.059 0.096 -0.045 10
-0.071 0.132 -0.096 9
-0.045 0.131 -0.09 8
-0.041 0.118 -0.081 8
-0.001 0.072 -0.019 9
0.017 0.016 0.075 8
0.017 -0.033 0.174 9
0.029 -0.066 0.258 8
0.054 -0.072 0.321 8
0.049 -0.052 0.341 9
0.067 -0.047 0.307 8
0.068 0.001 0.27 7
0.052 0.058 0.193 10
0.019 0.109 0.099 8
-0.019 0.131 0.004 9
-0.043 0.122 -0.059 8
-0.039 0.11 -0.053 8
-0.048 0.09 -0.081 9
-0.033 0.036 -0.072 8
0.003 -0.034 -0.015 9
0.045 -0.089 0.059 8
0.072 -0.11 0.101 8
0.069 -0.09 0.095 9
0.062 -0.081 0.086 7
0.052 -0.046 0.078 10
0.031 -0.009 0.07 8
0.001 0.007 0.051 8
-0.016 -0.015 0.056 9
-0.02 -0.073 0.087 8
-0.015 -0.165 0.141 9
-0.013 -0.148 0.126 8
-0.008 -0.232 0.157 8
0.0 -0.262 0.147 9
0.002 -0.241 0.103 8
-0.005 -0.153 0.033 9
0.006 -0.04 -0.038 6
0.053 0.043 -0.094 10
0.048 0.038 -0.084 9
0.071 0.072 -0.108 8
0.026 0.041 -0.098 9
-0.055 -0.022 -0.03 8
-0.116 -0.099 0.073 8
-0.102 -0.188 0.142 9
-0.05 -0.253 0.173 8
-0.045 -0.228 0.156 8
0.003 -0.234 0.17 9
0.052 -0.18 0.133 8
0.077 -0.102 0.038 7
0.062 -0.017 -0.084 10
0.031 0.048 -0.205 8
0.005 0.066 -0.293 9
0.004 0.059 -0.264 8
-0.017 0.022 -0.274 9
-0.044 -0.055 -0.19 8
-0.05 -0.13 -0.065 8
-0.015 -0.182 0.053 9
0.037 -0.205 0.144 8
0.079 -0.197 0.197 9
0.071 -0.177 0.177 8
0.109 -0.143 0.185 7
0.141 -0.067 0.173 10
0.135 0.023 0.146 8
0.085 0.092 0.073 8
0.01 0.159 -0.003 9
-0.061 0.199 -0.049 8
-0.055 0.179 -0.044 9
-0.085 0.145 -0.077 8
-0.068 0.072 -0.073 8
-0.026 -0.001 -0.026 9
0.026 -0.062 0.06 8
0.052 -0.079 0.156 9
0.047 -0.071 0.141 6
0.049 -0.059 0.194 10
0.036 -0.027 0.209 9
0.011 0.01 0.188 8
-0.013 0.025 0.124 9
-0.037 0.005 0.034 8
-0.064 -0.037 -0.051 8
-0.086 -0.077 -0.092 9
-0.078 -0.069 -0.083 8
-0.093 -0.091 -0.065 9
-0.088 -0.116 -0.018 8
-0.057 -0.13 0.036 8
-0.029 -0.095 0.085 7
-0.009 -0.038 0.115 10
0.006 0.024 0.125 9
0.006 0.022 0.113 8
0.007 0.071 0.084 8
0.0 0.077 0.037 9
-0.006 0.054 0.019 8
0.0 0.001 0.015 8
0.018 -0.058 0.021 9
0.016 -0.052 0.053 8
0.027 -0.047 0.048 9
0.033 -0.112 0.079 8
0.037 -0.092 0.091 7
0.046 -0.062 0.084 10
0.057 -0.046 0.056 8
0.046 -0.045 0.035 9
0.041 -0.041 0.031 8
0.007 -0.049 0.022 8
-0.033 -0.067 0.016 9
-0.07 -0.087 0.026 8
-0.104 -0.099 0.043 9
-0.116 -0.105 0.038 8
-0.105 -0.1 0.009 8
-0.094 -0.09 0.008 9
-0.082 -0.068 -0.042 6
-0.082 -0.029 -0.079 11
-0.08 0.029 -0.118 8
-0.054 0.098 -0.154 8
-0.01 0.158 -0.168 9
0.025 0.174 -0.158 8
0.022 0.156 -0.142 9
0.023 0.116 -0.108 8
0.006 0.056 -0.047 8
0.003 0.0 0.032 9
0.035 -0.056 0.08 8
0.082 -0.097 0.075 8
0.074 -0.088 0.067 7
0.102 -0.09 0.059 10
0.11 -0.05 0.034 9
0.118 0.026 -0.039 8
0.119 0.116 -0.13 8
0.092 0.181 -0.206 9
0.05 0.217 -0.235 8
0.005 0.199 -0.217 9
0.004 0.179 -0.195 8
-0.04 0.098 -0.149 8
-0.068 0.004 -0.066 9
-0.064 -0.071 0.025 8
-0.019 -0.113 0.087 7
0.041 -0.127 0.116 10
0.077 -0.118 0.113 8
0.069 -0.107 0.101 9
0.061 -0.067 0.087 8
0.02 -0.017 0.073 9
-0.022 0.009 0.051 8
-0.049 0.02 0.045 8
-0.072 0.007 0.067 9
-0.097 -0.036 0.105 8
-0.088 -0.032 0.094 8
-0.11 -0.071 0.133 9
-0.109 -0.093 0.141 7
-0.072 -0.102 0.106 10
-0.024 -0.106 0.019 8
0.011 -0.093 -0.088 8
0.01 -0.084 -0.079 9
0.022 -0.04 -0.171 8
0.028 0.03 -0.248 9
0.029 0.104 -0.285 8
0.012 0.144 -0.261 8
-0.013 0.143 -0.197 9
-0.031 0.119 -0.118 8
-0.028 0.107 -0.106 9
-0.037 0.056 -0.026 6
-0.016 -0.007 0.046 10
0.034 -0.043 0.077 9
0.089 -0.052 0.034 8
0.128 -0.002 -0.051 9
0.156 0.116 -0.131 8
0.141 0.104 -0.118 8
0.169 0.218 -0.164 9
0.168 0.276 -0.166 8
0.108 0.269 -0.124 9
0.021 0.211 -0.043 8
-0.047 0.115 0.055 8
-0.043 0.104 0.05 7
-0.083 -0.006 0.143 10
-0.084 -0.097 0.208 8
-0.052 -0.157 0.231 9
0.003 -0.176 0.22 8
0.068 -0.164 0.168 9
0.115 -0.14 0.08 8
0.104 -0.092 0.019 8
0.094 -0.083 0.017 9
0.027 -0.044 0.01 8
-0.052 -0.052 0.042 9
-0.131 -0.093 0.099 8
-0.19 -0.137 0.162 7
-0.243 -0.17 0.218 10
-0.278 -0.188 0.248 8
-0.25 -0.17 0.223 9
-0.212 -0.177 0.207 8
-0.111 -0.175 0.139 8
0.004 -0.153 0.026 9
0.094 -0.113 -0.088 8
0.117 -0.07 -0.139 9
0.076 -0.039 -0.141 8
0.068 -0.035 -0.126 8
0.008 -0.02 -0.113 9
-0.051 -0.013 -0.105 6
-0.101 -0.014 -0.118 10
-0.118 -0.014 -0.14 9
-0.108 -0.01 -0.189 8
-0.097 -0.009 -0.24 9
-0.06 -0.007 -0.216 8
-0.009 0.003 -0.232 8
0.042 0.033 -0.21 9
0.101 0.073 -0.16 8
0.142 0.09 -0.127 9
0.152 0.078 -0.117 8
0.137 0.07 -0.105 8
0.139 0.057 -0.126 7
0.161 0.051 -0.21 10
0.199 0.032 -0.357 9
0.22 0.01 -0.493 8
0.236 -0.007 -0.558 8
0.25 -0.033 -0.571 9
0.225 -0.03 -0.514 8
0.208 -0.044 -0.496 9
0.159 -0.052 -0.447 8
0.116 -0.065 -0.387 8
0.1 -0.079 -0.337 9
0.111 -0.12 -0.301 8
0.1 -0.108 -0.271 7
0.132 -0.202 -0.247 10
0.174 -0.311 -0.232 8
0.232 -0.448 -0.27 9
0.365 -0.538 -0.293 8
0.441 -0.61 -0.39 8
0.388 -0.744 -0.645 9
0.347 -0.797 -0.823 8
0.312 -0.717 -0.741 9
0.299 -0.676 -0.786 8
0.318 -0.64 -0.784 8
0.359 -0.636 -0.761 9
0.379 -0.665 -0.722 7
0.348 -0.724 -0.674 10
0.259 -0.825 -0.63 8
0.233 -0.742 -0.567 8
0.13 -0.836 -0.522 9
0.024 -0.919 -0.53 8
-0.066 -1.096 -0.597 9
-0.099 -1.155 -0.592 8
-0.169 -1.143 -0.677 8
-0.239 -1.248 -0.865 9
-0.215 -1.124 -0.778 8
-0.204 -1.186 -0.882 9
-0.129 -1.026 -0.806 6
0.003 -0.738 -0.661 10
0.152 -0.572 -0.629 9
0.314 -0.533 -0.631 8
0.282 -0.542 -0.605 9
0.254 -0.488 -0.545 8
0.35 -0.498 -0.539 8
0.214 -0.603 -0.624 9
0.062 -0.772 -0.766 8
-0.062 -0.849 -0.87 8
-0.155 -0.838 -0.82 9
-0.139 -0.754 -0.738 8
-0.217 -0.652 -0.498 7
-0.249 -0.438 -0.245 10
-0.222 -0.204 -0.143 8
-0.161 -0.013 -0.232 9
-0.09 0.189 -0.476 8
-0.073 0.406 -0.742 9
-0.066 0.365 -0.667 8
-0.177 0.595 -0.827 8
-0.413 0.846 -0.768 9
-0.682 1.053 -0.259 8
-0.9 1.229 0.477 9
-1.002 1.515 1.101 8
-0.902 1.364 0.99 7
-0.614 1.671 1.649 10
0.118 1.915 2.192 8
1.009 2.182 2.441 9
1.712 2.407 2.633 8
1.906 2.548 2.977 8
1.486 2.583 3.438 9
0.601 2.532 4.036 8
0.541 2.278 3.633 8
-0.351 2.255 4.23 9
-0.885 2.33 4.442 8
-1.031 2.495 4.26 9
-0.949 2.755 3.841 6
-0.736 2.996 3.282 10
-0.442 3.053 2.734 9
-0.397 2.748 2.461 8
-0.109 2.654 2.032 9
0.049 2.416 1.672 8
-0.115 2.053 1.303 8
-0.548 1.579 0.848 9
-1.129 1.164 0.444 8
-1.826 0.844 0.224 9
-1.644 0.76 0.201 8
-2.099 0.249 0.147 8
-1.854 -0.462 0.132 7
-1.169 -0.912 0.073 10
-0.414 -0.974 -0.01 9
0.314 -0.928 -0.121 8
0.77 -0.941 -0.238 8
0.693 -0.847 -0.214 9
0.802 -0.941 -0.229 8
0.606 -1.133 -0.135 9
0.252 -1.448 -0.057 8
-0.082 -1.76 -0.123 8
-0.371 -1.965 -0.366 9
-0.334 -2.111 -0.827 8
-0.301 -1.9 -0.745 7
-0.525 -1.905 -1.264 10
-0.317 -1.644 -1.624 8
-0.108 -1.259 -1.699 9
0.063 -0.913 -1.541 8
0.11 -0.688 -1.475 8
0.099 -0.619 -1.327 9
-0.012 -0.472 -1.486 8
-0.333 -0.393 -1.765 9
-0.685 -0.381 -1.813 8
-0.701 -0.461 -1.505 8
-0.345 -0.728 -1.194 9
-0.311 -0.655 -1.074 7
0.135 -0.918 -1.001 10
0.484 -0.973 -1.006 8
0.712 -0.948 -0.963 8
0.849 -0.851 -0.777 9
0.954 -0.639 -0.204 8
1.124 -0.513 0.748 9
1.364 -0.623 1.762 8
1.228 -0.561 1.586 8
1.347 -0.892 2.456 9
1.195 -1.393 3.037 8
0.866 -1.888 3.236 9
0.579 -2.149 3.158 6
0.544 -2.147 2.967 10
0.885 -2.055 2.836 9
0.797 -1.85 2.553 8
1.354 -1.767 2.645 8
1.9 -1.68 2.674 9
2.275 -1.676 2.331 8
2.308 -1.79 1.789 9
2.032 -1.9 1.094 8
1.654 -1.9 0.198 8
1.489 -1.71 0.178 9
1.215 -1.566 -0.786 8
1.058 -1.199 -1.727 7
1.023 -0.763 -2.554 10
1.077 -0.503 -3.075 8
0.889 -0.251 -3.03 9
0.411 0.209 -2.16 8
0.37 0.188 -1.944 9
0.035 0.434 -0.492 8
-0.096 0.295 0.89 8
-0.189 -0.088 2.011 9
-0.197 -0.461 2.751 8
0.062 -0.615 2.841 9
0.056 -0.553 2.557 8
0.584 -0.561 1.942 7
1.02 -0.353 0.842 10
1.218 -0.031 -0.154 8
1.148 0.288 -0.772 8
0.542 0.557 -1.033 9
-0.589 0.744 -0.902 8
-0.53 0.669 -0.812 9
-1.721 0.555 -0.27 8
-2.367 0.221 0.537 8
-2.223 -0.069 1.09 9
-1.533 -0.603 1.341 8
-0.88 -0.942 1.546 9
-0.792 -0.848 1.391 6
-0.499 -0.544 1.548 10
-0.58 -0.008 1.464 9
-1.213 0.671 1.069 8
-2.303 1.365 0.555 9
-3.4 1.748 0.102 8
-3.95 1.783 -0.104 8
-3.495 1.41 -0.047 9
-3.146 1.269 -0.042 8
-1.762 0.459 0.129 9
0.064 -0.513 0.281 8
1.811 -1.34 0.242 8
3.113 -1.882 -0.143 7
3.808 -2.125 -0.848 10
3.919 -2.023 -1.707 9
3.527 -1.821 -1.536 8
3.509 -1.778 -2.318 8
3.391 -2.192 -2.973 9
2.791 -2.63 -3.4 8
1.76 -2.66 -3.336 9
0.829 -2.568 -2.939 8
0.341 -2.547 -2.448 8
0.307 -2.292 -2.203 9
0.11 -2.171 -1.671 8
0.211 -1.969 -1.109 7
0.683 -1.745 -0.532 10
1.37 -1.625 0.074 8
2.0 -1.7 0.653 9
2.355 -1.867 1.224 8
2.119 -1.68 1.101 8
2.226 -1.844 1.663 9
2.086 -1.655 2.076 8
1.628 -1.056 2.066 9
1.069 -0.296 1.456 8
0.548 0.435 0.581 8
0.493 0.961 -0.145 9
0.444 0.864 -0.13 6
-0.342 1.135 -0.448 11
-0.457 1.183 -0.262 8
-0.407 1.086 0.276 8
-0.278 0.966 0.869 9
-0.229 0.947 1.233 8
-0.206 0.853 1.109 8
-0.313 0.996 1.066 9
-0.594 1.226 0.637 8
-0.928 1.446 0.135 9
-1.126 1.582 -0.204 8
-1.173 1.525 -0.334 8
-1.056 1.373 -0.301 7
-0.972 1.126 -0.272 10
-0.76 0.822 -0.212 9
-0.492 0.559 -0.214 8
-0.312 0.366 -0.325 8
-0.327 0.325 -0.471 9
-0.465 0.441 -0.497 8
-0.549 0.699 -0.391 9
-0.494 0.629 -0.352 8
-0.445 0.956 -0.272 8
-0.322 1.242 -0.451 9
-0.199 1.518 -0.956 8
0.013 1.769 -1.456 7
0.153 1.978 -1.823 10
0.103 1.985 -2.082 8
0.093 1.786 -1.874 9
0.04 1.608 -1.797 8
-0.098 1.467 -1.465 8
-0.302 1.362 -1.086 9
-0.382 1.187 -0.756 8
-0.216 1.031 -0.281 9
0.0 1.048 0.439 8
0.0 0.943 0.395 8
-0.056 0.913 0.954 9
-0.282 0.451 1.162 7
-0.545 -0.274 1.342 10
-0.936 -0.891 1.419 8
-1.379 -1.287 1.192 8
-1.508 -1.467 1.068 9
-1.357 -1.32 0.961 8
-0.97 -1.275 1.073 9
-0.381 -1.161 1.219 8
0.104 -1.382 1.276 8
0.487 -1.878 1.243 9
0.705 -2.244 1.153 8
0.634 -2.02 1.038 9
0.589 -2.212 0.934 6
0.368 -2.313 0.486 10
0.156 -2.318 0.092 9
0.066 -2.062 -0.046 8
0.122 -1.446 0.17 9
0.275 -0.891 0.46 8
0.248 -0.802 0.414 8
0.515 -0.828 0.528 9
0.706 -1.035 0.559 8
0.654 -1.011 0.554 8
0.443 -0.912 0.345 9
0.182 -0.767 -0.096 8
0.164 -0.691 -0.086 7
-0.094 -0.465 -0.632 10
-0.275 -0.196 -1.058 8
-0.352 0.099 -1.286 9
-0.357 0.344 -1.373 8
-0.234 0.428 -1.28 9
-0.026 0.458 -1.097 8
0.138 0.482 -0.971 8
0.124 0.434 -0.874 9
0.259 0.449 -0.786 8
0.423 0.499 -0.692 9
0.524 0.612 -0.635 8
0.562 0.773 -0.605 7
0.547 0.891 -0.574 10
0.296 0.925 -0.509 8
0.266 0.833 -0.458 9
-0.172 0.875 -0.374 8
-0.524 0.946 -0.33 8
-0.446 1.045 -0.257 9
-0.021 1.164 -0.237 8
0.502 1.207 -0.224 9
1.241 0.837 0.431 8
1.117 0.753 0.388 8
1.57 -0.064 1.046 9
1.178 -0.521 0.977 6
0.447 -0.556 0.876 10
-0.189 -0.489 0.883 9
-0.672 -0.189 0.774 8
-0.878 0.213 0.521 9
-0.79 0.191 0.469 8
-0.721 0.565 0.142 8
-0.415 0.84 -0.228 9
-0.083 0.91 -0.53 8
-0.052 0.748 -0.663 9
-0.274 0.434 -0.688 8
-0.247 0.39 -0.619 8
-0.491 0.098 -0.596 7
-0.653 -0.066 -0.67 10
-0.672 -0.12 -0.826 9
-0.577 -0.089 -0.78 8
-0.417 -0.063 -0.564 8
-0.263 -0.048 -0.345 9
-0.237 -0.043 -0.31 8
-0.189 -0.044 -0.031 9
-0.301 -0.151 0.298 8
-0.589 -0.38 0.511 8
-0.886 -0.572 0.473 9
-0.996 -0.62 0.114 8
-0.896 -0.558 0.103 7
-0.861 -0.522 -0.465 10
-0.749 -0.469 -0.923 8
-0.59 -0.447 -1.102 9
-0.412 -0.494 -0.857 8
-0.304 -0.617 -0.148 8
-0.169 -0.791 0.665 9
0.055 -0.945 1.263 8
0.05 -0.85 1.137 9
0.215 -0.886 1.366 8
0.235 -0.789 1.155 8
0.004 -0.595 0.73 9
-0.388 -0.349 0.283 7
-0.78 -0.118 -0.116 10
-1.082 0.008 -0.313 8
-0.974 0.007 -0.282 8
-1.134 -0.008 -0.193 9
-1.007 -0.131 0.112 8
-0.479 -0.274 0.413 9
0.21 -0.299 0.53 8
0.731 -0.212 0.482 8
0.658 -0.046 0.402 9
0.592 -0.041 0.361 8
0.493 0.157 0.292 9
-0.001 0.308 0.239 6
-0.435 0.404 0.274 10
-0.762 0.428 0.289 9
-0.887 0.333 0.364 8
-0.798 0.3 0.328 9
-0.63 0.159 0.59 8
-0.313 0.07 0.815 8
0.083 0.096 0.926 9
0.486 0.052 0.786 8
0.68 -0.024 0.521 8
0.517 0.044 0.261 9
0.465 0.039 0.235 8
0.126 0.114 -0.08 7
-0.192 0.159 -0.357 10
-0.437 0.155 -0.551 8
-0.569 0.078 -0.579 9
-0.538 -0.079 -0.435 8
-0.374 -0.278 -0.26 9
-0.336 -0.25 -0.234 8
-0.178 -0.49 -0.096 8
0.117 -0.697 0.034 9
0.636 -0.796 0.073 8
1.229 -0.832 0.018 9
1.623 -0.828 0.073 8
1.461 -0.745 0.066 7
1.38 -0.684 0.219 10
0.948 -0.632 0.322 8
0.407 -0.625 0.333 9
-0.136 -0.637 0.285 8
-0.551 -0.709 0.289 8
-0.782 -0.793 0.377 9
-0.821 -0.836 0.37 8
-0.739 -0.753 0.333 8
-0.605 -0.787 0.093 9
-0.29 -0.795 -0.192 8
0.121 -0.652 -0.408 9
0.576 -0.388 -0.541 6
# end
#Thu Feb 26 20:27:29 GMT+08:00 20158
