# Supplementary material for: Abnormal Gait Behavior Detection for Elderly Based on Enhanced Wigner-Ville Analysis and Cloud Incremental SVM Learning
Source: Hindawi journal article supplement (doi:10.1155/2016/5869238), 2016-01-01
Supplement: f1 [file 5869238.f1.zip › Supplementary Materials/Original Data/Forward fall Ending on the knees/original__55.txt]

# Accelerometer Values
# filename:  original__55.txt
# Saving start time: Thu Feb 26 20:28:10 GMT+08:00 2015

# sensor resolution: 0.0095825195m/s^2
#Sensorvendor: KIONIX, name: KX023 Accelerometer, type: 1,version : 1, range 39.240005

# X value, Y value, Z value, time diff in ms
-0.134 -0.05 0.144 10
-0.252 -0.092 0.199 8
-0.318 -0.16 0.269 9
-0.302 -0.168 0.26 8
-0.2 -0.09 0.151 8
-0.053 -0.01 0.021 9
0.065 0.056 -0.07 8
0.059 0.05 -0.063 9
0.11 0.106 -0.109 8
0.118 0.14 -0.107 8
0.099 0.131 -0.065 9
0.048 0.096 -0.009 7
-0.011 0.076 0.04 10
-0.01 0.068 0.036 8
-0.042 0.047 0.037 8
-0.031 0.053 -0.004 9
0.0 0.101 -0.055 8
0.022 0.123 -0.09 9
0.022 0.103 -0.103 8
0.025 0.083 -0.099 8
0.023 0.075 -0.089 9
0.053 0.06 -0.072 8
0.085 0.017 -0.059 8
0.093 -0.017 -0.055 7
0.063 -0.006 -0.047 10
0.009 0.034 -0.044 9
-0.05 0.079 -0.048 8
-0.045 0.071 -0.043 8
-0.095 0.082 -0.035 9
-0.129 0.044 -0.016 8
-0.146 -0.008 -0.007 9
-0.135 -0.024 -0.022 8
-0.1 -0.004 -0.059 8
-0.05 0.017 -0.094 9
-0.045 0.015 -0.084 8
0.016 0.026 -0.086 7
0.067 0.02 -0.064 10
0.084 -0.004 -0.038 8
0.077 -0.035 -0.019 9
0.037 -0.034 -0.027 8
-0.032 -0.007 -0.024 9
-0.029 -0.006 -0.022 8
-0.085 0.023 -0.002 8
-0.087 0.051 -0.007 9
-0.039 0.064 -0.024 8
0.016 0.057 -0.036 9
0.052 0.04 -0.076 8
0.047 0.036 -0.068 7
0.058 0.028 -0.162 10
0.049 0.036 -0.275 8
0.031 0.042 -0.349 8
0.018 0.038 -0.36 9
-0.02 0.043 -0.305 8
-0.085 0.049 -0.199 9
-0.076 0.044 -0.179 8
-0.123 0.026 -0.161 8
-0.147 -0.003 -0.078 9
-0.15 -0.009 -0.083 8
-0.156 0.01 -0.088 9
-0.184 0.017 -0.021 6
-0.209 -0.039 0.116 10
-0.188 -0.035 0.104 9
-0.176 -0.125 0.185 8
-0.129 -0.168 0.165 9
-0.11 -0.14 0.099 8
-0.136 -0.089 0.069 8
-0.176 -0.081 0.077 9
-0.188 -0.093 0.08 8
-0.169 -0.083 0.072 9
-0.139 -0.101 0.056 8
-0.1 -0.114 0.017 8
-0.08 -0.13 -0.032 7
-0.066 -0.196 -0.078 10
-0.037 -0.276 -0.171 9
0.015 -0.313 -0.314 8
0.014 -0.282 -0.283 8
0.057 -0.301 -0.431 9
0.078 -0.34 -0.548 8
0.08 -0.386 -0.613 8
0.059 -0.434 -0.637 9
0.032 -0.484 -0.628 8
0.0 -0.518 -0.594 9
0.0 -0.466 -0.535 8
-0.03 -0.473 -0.494 7
-0.071 -0.454 -0.445 10
-0.133 -0.435 -0.398 8
-0.2 -0.457 -0.373 9
-0.245 -0.513 -0.448 8
-0.272 -0.564 -0.684 8
-0.245 -0.507 -0.616 9
-0.272 -0.539 -0.881 8
-0.258 -0.522 -1.036 9
-0.195 -0.544 -1.147 8
-0.126 -0.634 -1.202 8
-0.064 -0.707 -1.119 9
-0.058 -0.636 -1.007 6
-0.03 -0.706 -0.832 11
-0.017 -0.845 -0.644 8
0.005 -1.047 -0.509 8
0.035 -1.195 -0.429 9
0.042 -1.158 -0.391 8
0.003 -0.89 -0.473 8
0.003 -0.801 -0.426 9
-0.035 -0.392 -0.614 8
-0.006 -0.016 -0.725 9
0.09 0.127 -0.617 8
0.225 0.066 -0.316 8
0.4 -0.041 0.137 7
0.601 -0.177 0.629 10
0.541 -0.159 0.566 9
0.702 -0.273 0.977 8
0.745 -0.337 1.175 8
0.625 -0.342 1.038 9
0.351 -0.206 0.787 8
0.015 0.016 0.576 9
-0.313 0.207 0.449 8
-0.282 0.186 0.404 8
-0.561 0.321 0.385 9
-0.679 0.404 0.552 8
-0.601 0.364 0.897 7
-0.396 0.248 1.165 10
-0.183 0.229 1.242 8
-0.089 0.359 1.169 9
-0.08 0.323 1.052 8
-0.188 0.557 0.903 9
-0.528 0.918 0.774 8
-0.955 1.321 0.696 8
-1.159 1.671 0.57 9
-1.038 1.95 0.392 8
-0.814 2.073 0.268 8
-0.733 1.866 0.241 9
-0.593 1.86 0.251 7
-0.558 1.73 0.392 10
-0.639 1.49 0.693 8
-0.719 1.121 1.111 8
-0.608 0.672 1.489 9
-0.304 0.235 1.713 8
-0.274 0.211 1.541 9
0.152 -0.136 1.54 8
0.72 -0.273 1.273 8
1.365 -0.147 0.758 9
1.916 0.232 0.128 8
2.124 0.746 -0.513 9
1.912 0.672 -0.462 6
1.66 1.143 -1.118 10
1.16 1.451 -1.786 9
0.816 1.658 -2.321 8
0.805 1.932 -2.586 9
1.178 2.269 -2.399 8
1.768 2.643 -1.625 8
1.591 2.379 -1.463 9
2.1 2.733 -0.274 8
2.444 3.043 1.158 9
2.08 2.875 1.994 8
1.024 2.066 2.127 8
0.337 1.298 2.147 7
0.258 0.652 1.941 10
0.233 0.587 1.747 8
0.579 -0.018 1.533 9
1.066 -0.528 1.62 8
1.29 -0.963 2.05 9
1.071 -1.302 2.581 8
0.332 -1.61 2.854 8
-0.81 -1.838 2.942 9
-0.729 -1.654 2.647 8
-1.92 -1.696 2.603 9
-2.758 -1.37 2.065 8
-2.976 -0.712 1.088 7
-2.561 -0.26 0.115 10
-1.721 -0.401 -0.557 8
-0.656 -0.934 -0.863 9
-0.59 -0.84 -0.777 8
0.427 -1.43 -0.772 8
1.109 -1.923 -0.557 9
1.282 -2.285 -0.286 8
0.897 -2.436 -0.079 9
0.109 -2.372 0.027 8
-0.809 -2.114 0.052 8
-0.728 -1.903 0.047 9
-1.626 -1.415 -0.082 6
-2.303 -0.762 -0.399 11
-2.569 -0.198 -0.758 8
-2.769 0.098 -1.17 8
-2.895 0.068 -1.517 9
-2.506 -0.117 -1.613 8
-2.256 -0.105 -1.452 8
-1.501 -0.27 -1.567 9
-0.728 -0.422 -1.825 8
-0.132 -0.505 -2.082 9
0.21 -0.5 -2.16 8
0.214 -0.47 -2.034 8
0.193 -0.423 -1.831 7
-0.007 -0.406 -1.686 10
-0.258 -0.387 -1.589 9
-0.482 -0.352 -1.529 8
-0.646 -0.313 -1.445 8
-0.742 -0.299 -1.376 9
-0.692 -0.353 -1.406 8
-0.622 -0.318 -1.266 9
-0.363 -0.41 -1.329 8
-0.011 -0.43 -1.363 8
0.238 -0.443 -1.313 9
0.371 -0.626 -1.138 8
0.354 -0.965 -0.887 7
0.104 -1.302 -0.576 10
0.094 -1.172 -0.518 8
-0.306 -1.416 -0.169 9
-0.597 -1.433 0.118 8
-0.687 -1.116 0.479 9
-0.597 -0.675 1.061 8
-0.226 -0.493 1.785 8
0.4 -0.608 2.584 9
0.36 -0.547 2.326 8
1.034 -0.68 3.089 8
1.524 -0.493 3.649 9
1.56 0.144 3.958 7
1.081 1.108 4.185 10
0.26 2.114 4.424 8
-0.712 2.768 4.606 8
-0.641 2.491 4.145 9
-1.468 2.564 4.282 8
-1.879 2.11 4.39 9
-1.885 1.298 4.479 8
-1.606 0.379 4.422 8
-1.15 -0.368 3.964 9
-0.718 -0.704 2.962 8
-0.647 -0.633 2.666 9
-0.384 -0.52 1.304 6
-0.327 -0.244 -0.13 10
-0.379 0.018 -1.285 9
-0.357 0.2 -2.091 8
-0.237 0.304 -2.655 9
-0.213 0.273 -2.389 8
-0.098 0.321 -2.695 8
-0.041 0.217 -2.685 9
-0.016 -0.016 -2.437 8
0.0 -0.313 -1.975 9
0.031 -0.645 -1.484 8
0.138 -0.864 -1.199 8
0.124 -0.778 -1.079 7
0.353 -0.851 -1.082 10
0.618 -0.828 -1.305 8
0.786 -0.752 -1.538 9
0.85 -0.659 -1.625 8
0.876 -0.519 -1.584 9
0.941 -0.32 -1.521 8
0.846 -0.288 -1.369 8
0.951 -0.12 -1.344 9
1.046 -0.123 -1.183 8
1.133 -0.319 -0.708 9
1.106 -0.644 -0.33 8
0.926 -0.863 -0.233 7
0.639 -0.728 -0.131 10
0.575 -0.655 -0.118 8
0.257 -0.31 -0.087 9
0.01 0.057 -0.235 8
-0.2 0.371 -0.411 8
-0.353 0.559 -0.48 9
-0.341 0.607 -0.516 8
-0.207 0.562 -0.547 9
-0.186 0.506 -0.492 8
-0.011 0.347 -0.349 8
0.138 0.046 0.034 9
0.176 -0.29 0.417 6
0.113 -0.612 0.606 10
0.039 -0.786 0.649 9
-0.009 -0.754 0.654 8
-0.008 -0.678 0.588 9
-0.04 -0.562 0.608 8
-0.045 -0.385 0.63 8
-0.037 -0.254 0.594 9
-0.01 -0.263 0.548 8
0.077 -0.452 0.543 9
0.237 -0.74 0.531 8
0.214 -0.666 0.478 8
0.409 -0.861 0.454 7
0.592 -0.906 0.417 10
0.7 -0.866 0.349 9
0.676 -0.774 0.273 8
0.523 -0.697 0.256 8
0.471 -0.627 0.23 9
0.222 -0.59 0.383 8
-0.039 -0.559 0.688 9
-0.18 -0.522 0.903 8
-0.158 -0.468 0.85 8
-0.05 -0.418 0.656 9
0.067 -0.404 0.413 8
0.061 -0.364 0.371 7
0.201 -0.384 0.111 10
0.338 -0.366 -0.115 8
0.406 -0.302 -0.33 9
0.346 -0.236 -0.483 8
0.156 -0.184 -0.533 8
-0.072 -0.144 -0.494 9
-0.065 -0.13 -0.445 8
-0.233 -0.099 -0.412 9
-0.276 -0.067 -0.484 8
-0.216 0.025 -0.601 8
-0.086 0.156 -0.748 9
0.08 0.232 -0.927 7
0.233 0.254 -1.024 10
0.209 0.229 -0.922 8
0.273 0.198 -0.805 8
0.199 0.095 -0.507 9
0.026 -0.015 -0.215 8
-0.146 -0.06 -0.063 9
-0.245 0.021 -0.039 8
-0.265 0.13 -0.024 8
-0.239 0.117 -0.022 9
-0.195 0.075 0.073 8
-0.135 -0.037 0.24 9
-0.07 -0.082 0.358 6
0.028 -0.098 0.368 10
0.157 -0.132 0.312 9
0.258 -0.154 0.252 8
0.232 -0.139 0.227 8
0.247 -0.12 0.198 9
0.192 0.071 0.107 8
0.107 0.387 -0.1 9
-0.003 0.489 -0.265 8
-0.129 0.323 -0.309 8
-0.179 0.205 -0.291 9
-0.161 0.185 -0.262 8
-0.116 0.343 -0.249 7
-0.102 0.579 -0.229 10
-0.161 0.66 -0.201 8
-0.183 0.66 -0.257 9
-0.136 0.736 -0.42 8
-0.123 0.662 -0.378 9
-0.091 0.696 -0.535 8
-0.072 0.383 -0.696 8
0.092 0.055 -0.701 9
0.317 -0.119 -0.421 8
0.427 -0.326 -0.133 9
0.47 -0.417 0.045 8
0.423 -0.375 0.04 7
0.449 -0.423 0.263 10
0.428 -0.492 0.502 8
0.345 -0.505 0.613 9
0.184 -0.383 0.65 8
-0.004 -0.156 0.596 8
-0.133 0.073 0.59 9
-0.119 0.066 0.531 8
-0.203 0.021 0.449 8
-0.124 -0.075 0.364 9
0.062 0.037 0.431 8
0.113 0.146 0.446 9
0.034 0.198 0.452 6
-0.155 0.189 0.446 10
-0.139 0.17 0.401 9
-0.352 0.197 0.383 8
-0.421 0.271 0.346 9
-0.372 0.273 0.141 8
-0.265 0.306 -0.2 8
-0.146 0.408 -0.415 9
-0.04 0.32 -0.351 8
-0.036 0.288 -0.316 9
0.122 0.07 -0.053 8
0.293 -0.076 0.077 8
0.391 -0.086 0.035 7
0.364 0.037 -0.024 10
0.315 0.161 -0.239 9
0.124 0.146 -0.786 8
0.112 0.131 -0.708 8
-0.119 0.211 -1.266 9
-0.128 0.437 -1.54 8
-0.064 0.46 -1.385 9
0.207 0.087 -0.372 8
0.372 -0.395 0.627 8
0.411 -0.22 1.237 9
0.37 -0.198 1.114 8
0.517 0.184 1.322 7
0.344 -0.247 0.713 10
-0.079 -0.801 0.107 8
-0.173 -0.679 -0.154 9
0.081 -0.451 -0.357 8
0.073 -0.406 -0.321 8
0.294 -0.326 -0.289 9
0.338 -0.045 -0.092 8
0.209 0.214 0.024 9
0.099 0.49 0.052 8
0.099 0.843 -0.075 8
0.08 0.825 -0.19 9
0.072 0.742 -0.171 6
0.042 0.399 -0.2 11
0.202 0.098 -0.146 8
0.518 -0.06 0.068 8
0.73 -0.182 0.305 9
0.73 -0.228 0.417 8
0.707 0.031 0.508 9
0.636 0.028 0.457 8
0.431 0.431 0.239 8
-0.04 0.707 -0.302 9
-0.5 0.889 -0.511 8
-0.81 0.976 -0.359 8
-0.81 0.995 -0.261 7
-0.554 0.948 -0.471 10
-0.499 0.853 -0.424 9
-0.248 0.67 -1.074 8
-0.099 0.369 -1.957 8
0.043 -0.185 -2.428 9
0.512 -1.161 -1.089 8
1.097 -2.449 0.888 9
1.383 -3.238 1.777 8
1.244 -2.914 1.599 8
1.07 -2.332 1.755 9
0.476 -0.835 1.243 8
-0.053 0.385 0.393 7
-0.216 0.828 -0.3 10
0.035 0.768 -0.445 8
0.357 0.508 -0.409 9
0.321 0.457 -0.368 8
0.417 0.149 -0.382 9
0.392 -0.12 -0.128 8
0.385 -0.285 0.305 8
0.45 -0.377 0.749 9
0.533 -0.531 1.181 8
0.48 -0.478 1.063 9
0.529 -0.625 0.956 8
0.482 -0.567 1.12 7
0.326 -0.285 0.614 10
0.175 0.265 0.11 8
-0.052 0.738 -0.339 8
-0.301 0.807 -0.555 9
-0.271 0.726 -0.499 8
-0.258 0.646 -0.492 9
0.013 0.471 -0.577 8
0.273 0.292 -0.812 8
0.446 0.164 -0.954 9
0.562 -0.011 -0.84 8
0.516 -0.226 -0.575 9
0.464 -0.203 -0.517 6
0.264 -0.288 -0.211 10
-0.026 -0.266 -0.048 9
-0.346 -0.2 0.0 8
-0.577 0.027 0.151 9
-0.67 0.194 0.241 8
-0.472 0.1 0.174 8
-0.425 0.09 0.157 9
0.144 -0.155 0.192 8
0.694 -0.46 0.378 9
0.878 -0.701 0.532 8
0.645 -0.633 0.595 8
0.048 -0.293 0.61 7
-0.578 -0.014 0.587 10
-0.52 -0.012 0.528 8
-0.763 0.281 0.56 9
-0.625 0.549 0.49 8
-0.328 0.49 0.149 9
-0.002 0.246 -0.189 8
0.183 -0.042 -0.32 8
0.164 -0.257 -0.05 9
0.148 -0.232 -0.045 8
0.065 -0.242 0.325 9
-0.024 -0.189 0.449 8
-0.122 -0.039 0.447 7
-0.25 0.252 0.338 10
-0.353 0.44 0.084 8
-0.318 0.396 -0.255 9
-0.168 0.356 -0.23 8
0.311 -0.03 -0.429 8
0.924 -0.229 -0.462 9
1.352 -0.341 -0.41 8
1.297 -0.312 -0.43 9
0.778 -0.188 -0.511 8
0.7 -0.169 -0.46 8
0.084 0.111 -0.307 9
-0.457 0.418 0.032 6
-0.739 0.564 0.399 11
-0.642 0.543 0.697 8
-0.399 0.357 0.676 8
-0.16 0.204 0.312 9
-0.144 0.184 0.281 8
0.046 0.25 -0.192 8
0.167 0.38 -0.651 9
0.3 0.43 -1.013 8
0.305 0.541 -1.213 9
0.138 0.74 -1.291 8
0.053 0.77 -1.411 8
0.047 0.693 -1.27 7
0.09 0.663 -1.527 10
0.225 0.772 -1.711 9
0.277 0.852 -1.739 8
0.342 0.685 -1.551 8
0.507 0.178 -1.132 9
0.509 -0.472 -0.407 8
0.458 -0.424 -0.366 9
0.281 -0.737 0.566 8
0.008 -0.31 1.292 8
-0.445 0.253 1.472 9
-0.848 0.347 1.025 8
-0.763 0.313 0.48 7
-0.536 0.474 0.159 10
-0.482 0.427 0.143 8
-0.17 0.087 -0.064 9
0.117 -0.326 -0.254 8
0.439 -0.582 -0.37 8
0.761 -0.603 -0.166 9
0.943 -0.609 0.185 8
0.848 -0.548 0.45 9
0.924 -0.623 0.405 8
0.845 -0.662 0.586 8
0.629 -0.606 0.594 9
0.448 -0.289 0.476 7
0.316 0.09 0.538 10
0.32 0.221 0.777 8
0.288 0.199 0.699 8
0.466 0.0 0.823 9
0.682 -0.301 0.737 8
0.806 -0.495 0.575 9
0.826 -0.623 0.518 8
0.637 -0.642 0.523 8
0.251 -0.412 0.516 9
0.226 -0.371 0.465 8
-0.128 0.02 0.449 9
-0.307 0.159 0.362 6
-0.266 0.005 0.199 10
-0.064 -0.045 0.055 9
0.152 -0.035 -0.139 8
0.214 -0.065 -0.406 9
0.193 -0.059 -0.366 8
0.138 -0.019 -0.466 8
0.071 -0.092 -0.262 9
-0.008 -0.3 0.095 8
-0.057 -0.426 0.369 8
-0.007 -0.476 0.441 9
0.104 -0.491 0.288 8
0.093 -0.442 0.259 7
0.197 -0.415 0.056 10
0.155 -0.373 -0.052 8
-0.04 -0.329 -0.165 9
-0.266 -0.29 -0.226 8
-0.423 -0.225 -0.12 9
-0.485 -0.105 0.019 8
-0.436 -0.094 0.017 8
-0.446 -0.024 0.018 9
-0.366 -0.066 -0.091 8
-0.261 -0.111 -0.151 9
-0.227 -0.157 -0.129 8
-0.204 -0.141 -0.116 7
-0.148 -0.34 0.001 10
-0.133 -0.306 0.001 8
-0.042 -0.249 0.024 9
-0.071 -0.161 0.098 8
-0.239 -0.096 0.179 8
-0.423 -0.007 0.205 9
-0.526 0.099 0.072 8
-0.563 0.197 -0.136 9
-0.507 0.177 -0.123 8
-0.544 0.273 -0.265 8
-0.573 0.39 -0.358 9
-0.599 0.508 -0.381 6
-0.647 0.591 -0.291 10
-0.705 0.567 -0.142 9
-0.635 0.51 -0.128 8
-0.624 0.356 -0.043 9
-0.501 0.184 -0.098 8
-0.355 0.102 -0.194 8
-0.265 0.097 -0.211 9
-0.22 0.103 -0.172 8
-0.189 0.042 -0.127 9
-0.17 0.038 -0.114 8
-0.17 -0.133 -0.05 8
-0.189 -0.282 0.026 7
-0.18 -0.313 0.114 10
-0.139 -0.305 0.253 9
-0.086 -0.245 0.4 8
-0.037 -0.118 0.497 8
-0.033 -0.107 0.447 9
-0.003 0.01 0.467 8
0.006 0.139 0.414 9
0.01 0.287 0.406 8
0.009 0.34 0.459 8
-0.003 0.249 0.528 9
-0.007 0.111 0.575 8
-0.006 0.1 0.517 7
-0.019 -0.057 0.401 10
-0.079 -0.123 0.257 8
-0.221 0.137 0.356 9
-0.481 0.615 0.674 8
-0.885 0.93 0.954 8
-1.288 0.959 1.04 9
-1.159 0.863 0.936 8
-1.356 0.723 0.975 9
-1.371 0.493 0.997 8
-1.298 0.184 1.043 8
-1.144 -0.131 0.931 9
-0.899 -0.363 0.488 7
-0.581 -0.525 -0.019 10
-0.522 -0.473 -0.017 8
-0.208 -0.559 -0.284 8
-0.015 -0.605 -0.132 9
0.062 -0.674 0.203 8
0.099 -0.76 0.428 9
0.093 -0.782 0.556 8
0.084 -0.684 0.55 8
0.075 -0.616 0.495 9
0.315 -0.457 0.333 8
0.684 -0.299 -0.095 9
1.14 -0.086 -0.801 6
1.55 0.21 -1.52 10
1.766 0.461 -2.012 9
1.59 0.415 -1.811 8
1.586 0.507 -2.091 8
1.356 0.469 -2.166 9
0.916 0.449 -1.971 8
0.326 0.505 -1.548 9
-0.251 0.576 -1.005 8
-0.722 0.611 -0.506 8
-0.65 0.55 -0.455 9
-0.924 0.561 -0.207 8
-0.934 0.628 -0.277 7
-0.737 0.752 -0.521 10
-0.439 0.82 -0.757 8
-0.113 0.806 -0.902 9
0.129 0.722 -0.845 8
0.116 0.65 -0.761 9
0.169 0.458 -0.45 8
0.043 0.237 0.06 8
-0.195 0.108 0.632 9
-0.47 0.045 1.106 8
-0.703 0.023 1.335 9
-0.848 0.011 1.339 8
-0.763 0.009 1.205 7
-0.793 -0.012 1.113 10
-0.687 -0.056 0.925 8
-0.614 -0.128 0.866 9
-0.909 -0.149 1.056 8
-1.05 -0.084 1.129 8
-0.714 -0.05 0.748 9
-0.643 -0.045 0.674 8
-0.257 -0.112 -0.084 8
0.028 -0.272 -0.809 9
0.18 -0.442 -1.155 8
0.25 -0.581 -1.205 9
0.225 -0.523 -1.084 6
0.391 -0.451 -1.424 10
0.352 -0.406 -1.282 9
0.316 -0.122 -1.34 8
0.19 0.096 -1.255 9
0.047 0.168 -1.159 8
-0.087 0.161 -1.161 8
-0.211 0.178 -1.144 9
-0.19 0.161 -1.03 8
-0.392 0.269 -0.927 9
-0.679 0.436 -0.525 8
-0.862 0.57 -0.195 8
-0.93 0.658 0.007 7
-0.955 0.736 0.177 10
-0.827 0.754 0.482 8
-0.745 0.679 0.434 9
-0.511 0.489 0.704 8
-0.184 0.158 0.796 9
0.226 -0.127 0.701 8
0.577 -0.397 0.546 8
0.802 -0.613 0.419 9
0.873 -0.63 0.277 8
0.786 -0.567 0.25 9
0.689 -0.427 0.04 8
0.417 -0.256 0.016 7
0.088 -0.131 0.257 10
-0.132 -0.051 0.374 8
-0.15 0.003 0.257 9
-0.016 0.038 -0.054 8
-0.015 0.034 -0.049 8
0.14 0.055 -0.337 9
0.249 0.071 -0.341 8
0.299 0.083 -0.166 9
0.296 0.08 -0.02 8
0.248 0.082 0.016 8
0.181 0.103 -0.008 9
0.163 0.092 -0.007 6
0.089 0.066 -0.038 11
0.01 -0.009 -0.114 8
-0.046 -0.069 -0.147 8
-0.085 -0.086 -0.044 9
-0.07 -0.063 0.164 8
-0.063 -0.015 0.411 9
-0.056 -0.013 0.37 8
0.162 0.04 0.437 8
0.192 0.061 0.225 9
0.186 0.076 -0.026 8
0.191 0.127 -0.225 8
0.172 0.114 -0.202 7
0.191 0.15 -0.394 10
0.219 0.171 -0.524 9
0.244 0.233 -0.499 8
0.226 0.257 -0.363 8
0.163 0.253 -0.248 9
0.101 0.297 -0.196 8
0.042 0.342 -0.19 9
0.038 0.308 -0.171 8
-0.028 0.366 -0.093 8
-0.111 0.436 0.029 9
-0.206 0.476 0.124 8
-0.309 0.492 0.209 7
-0.447 0.496 0.164 10
-0.613 0.502 0.071 8
-0.551 0.451 0.064 9
-0.648 0.447 0.12 8
-0.613 0.407 0.236 9
-0.466 0.349 0.283 8
-0.314 0.295 0.273 8
-0.269 0.257 0.261 9
-0.346 0.244 0.22 8
-0.311 0.22 0.198 8
-0.313 0.225 -0.057 9
-0.059 0.198 -0.433 7
0.302 0.065 -0.654 10
0.654 -0.197 -0.71 8
0.911 -0.441 -0.684 8
0.927 -0.472 -0.6 9
0.834 -0.425 -0.54 8
0.597 -0.222 -0.305 9
0.166 0.038 0.068 8
-0.306 0.223 0.335 8
-0.655 0.409 0.41 9
-0.79 0.522 0.394 8
-0.771 0.531 0.191 9
-0.694 0.478 0.172 6
-0.644 0.544 -0.112 10
-0.574 0.593 -0.238 9
-0.466 0.499 -0.311 8
-0.276 0.344 -0.367 9
-0.061 0.191 -0.38 8
-0.055 0.172 -0.342 8
0.108 0.043 -0.325 9
0.257 -0.017 -0.257 8
0.392 -0.057 -0.205 9
0.513 -0.118 -0.204 8
0.65 -0.216 -0.186 8
0.585 -0.195 -0.167 7
0.712 -0.253 -0.099 10
0.765 -0.211 -0.054 9
0.705 -0.135 -0.116 8
0.539 -0.073 -0.23 8
0.344 -0.031 -0.292 9
0.204 0.003 -0.259 8
0.138 0.015 -0.123 8
0.124 0.013 -0.11 9
0.124 -0.002 0.032 8
0.166 -0.018 0.099 9
0.187 -0.019 0.097 8
0.155 -0.009 -0.038 7
0.088 0.16 -0.479 10
-0.037 0.463 -0.777 8
-0.033 0.417 -0.699 9
-0.113 0.456 -0.478 8
-0.088 0.233 -0.035 8
-0.062 0.071 0.387 9
-0.033 0.07 0.536 8
0.013 0.151 0.363 9
0.038 0.193 0.13 8
0.034 0.173 0.117 8
0.027 0.168 -0.014 9
0.001 0.182 -0.058 6
0.006 0.209 -0.043 11
0.095 0.155 -0.015 8
0.211 0.006 0.112 8
0.276 -0.142 0.329 9
0.248 -0.127 0.296 8
0.234 -0.196 0.448 8
0.113 -0.176 0.541 9
-0.027 -0.082 0.575 8
-0.105 -0.011 0.536 9
-0.128 -0.009 0.43 8
-0.115 -0.008 0.215 8
-0.087 -0.023 0.193 7
-0.023 -0.019 -0.031 10
0.011 0.023 -0.144 9
-0.017 0.088 -0.18 8
-0.039 0.127 -0.199 8
-0.014 0.129 -0.215 9
-0.012 0.116 -0.194 8
0.026 0.088 -0.189 9
0.048 0.055 -0.156 8
0.053 0.019 -0.117 8
0.047 0.014 -0.141 9
0.033 0.071 -0.238 8
0.03 0.064 -0.214 7
0.022 0.117 -0.303 10
0.001 0.158 -0.347 8
-0.037 0.182 -0.37 9
-0.046 0.143 -0.376 8
-0.029 0.075 -0.33 8
-0.046 0.082 -0.237 9
-0.152 0.205 -0.093 8
-0.136 0.184 -0.083 9
-0.3 0.35 0.046 8
-0.387 0.469 0.032 8
-0.326 0.526 -0.067 9
-0.204 0.524 -0.127 7
-0.111 0.472 -0.094 10
-0.056 0.347 0.026 8
-0.051 0.312 0.023 8
-0.011 0.127 0.116 9
0.036 -0.016 0.184 8
0.068 -0.107 0.237 9
0.047 -0.127 0.259 8
-0.018 -0.007 0.288 8
-0.075 0.139 0.26 9
-0.068 0.125 0.234 8
-0.058 0.199 0.096 9
0.01 0.21 -0.077 6
0.093 0.141 -0.219 10
0.167 0.009 -0.306 9
0.239 -0.107 -0.307 8
0.262 -0.174 -0.205 9
0.236 -0.157 -0.184 8
0.158 -0.17 0.02 8
0.018 -0.108 0.259 9
-0.114 0.021 0.382 8
-0.216 0.16 0.289 8
-0.244 0.245 0.044 9
-0.22 0.22 0.04 8
-0.178 0.239 -0.345 7
-0.112 0.217 -0.755 10
-0.075 0.179 -0.919 8
-0.099 0.028 -0.807 9
-0.196 -0.059 -0.486 8
-0.407 0.081 -0.141 9
-0.366 0.072 -0.127 8
-0.646 0.18 0.073 8
-0.773 0.115 0.429 9
-0.668 -0.087 0.788 8
-0.36 -0.322 0.816 9
-0.001 -0.431 0.695 8
0.0 -0.388 0.626 7
0.18 -0.367 0.466 10
0.187 -0.312 0.297 8
0.128 -0.264 0.204 9
0.048 -0.251 0.159 8
-0.073 -0.239 0.126 8
-0.183 -0.199 0.108 9
-0.166 -0.224 0.104 8
-0.149 -0.202 0.093 9
-0.027 -0.332 0.038 8
# end
#Thu Feb 26 20:28:17 GMT+08:00 20151
