# Supplementary material for: Abnormal Gait Behavior Detection for Elderly Based on Enhanced Wigner-Ville Analysis and Cloud Incremental SVM Learning
Source: Hindawi journal article supplement (doi:10.1155/2016/5869238), 2016-01-01
Supplement: f1 [file 5869238.f1.zip › Supplementary Materials/Original Data/Forward fall Ending on the knees/original__56.txt]

# Accelerometer Values
# filename:  original__56.txt
# Saving start time: Thu Feb 26 20:28:20 GMT+08:00 2015

# sensor resolution: 0.0095825195m/s^2
#Sensorvendor: KIONIX, name: KX023 Accelerometer, type: 1,version : 1, range 39.240005

# X value, Y value, Z value, time diff in ms
0.194 0.127 -0.17 8
0.174 0.114 -0.153 8
0.267 0.1 -0.138 9
0.299 0.097 -0.02 8
0.32 0.087 -0.074 7
0.273 0.057 -0.147 10
0.15 0.049 -0.184 8
0.031 0.037 -0.185 9
0.028 0.033 -0.166 8
-0.031 -0.018 -0.124 9
-0.052 -0.083 -0.048 8
-0.049 -0.163 0.047 8
-0.036 -0.219 0.158 9
-0.028 -0.223 0.245 8
-0.021 -0.194 0.284 8
-0.019 -0.174 0.255 9
-0.001 -0.116 0.25 7
0.028 -0.05 0.237 10
0.042 -0.031 0.215 8
0.103 -0.057 0.239 8
0.101 -0.094 0.201 9
-0.046 -0.086 0.083 8
-0.042 -0.078 0.075 9
-0.144 -0.06 0.052 8
-0.135 -0.103 0.037 8
-0.094 -0.142 -0.014 9
-0.053 -0.102 -0.008 8
-0.01 -0.046 0.035 9
-0.009 -0.042 0.031 6
0.036 0.002 0.074 10
0.052 0.003 0.074 9
0.032 -0.039 0.056 8
0.013 -0.049 0.078 9
-0.001 -0.062 0.074 8
-0.004 -0.08 0.059 8
0.0 -0.088 0.03 9
0.0 -0.079 0.027 8
0.06 0.009 0.0 9
0.181 0.126 -0.046 8
0.267 0.115 -0.098 8
0.241 0.068 -0.08 7
0.121 0.042 -0.058 10
0.006 0.022 -0.026 9
0.006 0.02 -0.023 8
-0.09 0.007 0.038 8
-0.142 0.007 0.065 9
-0.121 0.016 0.025 8
-0.073 0.039 -0.045 8
0.008 0.058 -0.098 9
0.155 0.063 -0.143 8
0.139 0.057 -0.129 9
0.287 0.057 -0.152 8
0.366 0.059 -0.121 7
0.372 0.051 -0.1 10
0.289 0.033 -0.116 8
0.115 0.044 -0.124 9
0.104 0.039 -0.08 8
-0.056 0.035 -0.072 8
-0.135 0.15 -0.033 9
-0.159 0.15 -0.027 8
-0.165 0.125 -0.008 9
-0.167 0.073 0.027 8
-0.16 -0.009 0.071 8
-0.144 -0.008 0.064 9
-0.108 -0.085 0.105 6
-0.023 -0.15 0.118 11
0.081 -0.181 0.131 8
0.119 -0.163 0.131 8
0.085 -0.124 0.128 9
0.07 -0.075 0.172 8
0.063 -0.067 0.155 8
0.129 -0.021 0.161 9
0.225 0.0 0.086 8
0.253 -0.002 -0.017 9
0.207 0.007 -0.128 8
0.144 0.044 -0.214 8
0.13 0.039 -0.193 7
0.095 0.083 -0.211 10
0.057 0.099 -0.169 9
-0.026 0.091 -0.081 8
-0.114 0.07 -0.002 8
-0.168 0.031 0.011 9
-0.185 -0.008 0.005 8
-0.149 -0.028 0.019 9
-0.134 -0.026 0.017 8
-0.031 -0.041 0.029 8
0.1 -0.072 0.034 9
0.195 -0.1 0.043 8
0.218 -0.099 0.059 7
0.152 -0.07 0.086 10
0.045 -0.037 0.106 8
0.04 -0.034 0.096 9
-0.023 -0.013 0.086 8
-0.004 -0.018 0.049 8
0.063 -0.027 0.0 9
0.118 -0.031 -0.06 8
0.148 -0.041 -0.098 9
0.16 -0.059 -0.101 8
0.144 -0.053 -0.091 8
0.131 -0.067 -0.071 9
0.087 -0.068 -0.034 7
0.047 -0.064 -0.006 10
0.012 -0.067 0.0 8
-0.042 -0.074 -0.022 8
-0.033 -0.049 -0.078 9
-0.03 -0.044 -0.07 8
0.069 -0.017 -0.149 9
0.18 -0.016 -0.214 8
0.242 -0.032 -0.209 8
0.219 -0.059 -0.147 9
0.14 -0.08 -0.061 8
0.126 -0.072 -0.055 9
0.003 -0.081 -0.049 6
-0.079 -0.079 0.186 10
-0.033 -0.075 0.212 9
0.063 -0.069 0.141 8
0.154 -0.061 0.05 9
0.223 -0.06 -0.018 8
0.201 -0.054 -0.017 8
0.227 -0.057 -0.084 9
0.212 -0.057 -0.127 8
0.142 -0.052 -0.144 9
0.03 -0.058 -0.145 8
-0.098 -0.062 -0.006 8
-0.088 -0.055 -0.005 7
-0.215 -0.045 0.116 10
-0.232 -0.062 0.016 8
-0.122 -0.121 -0.165 9
0.049 -0.147 -0.342 8
0.263 -0.102 -0.396 9
0.524 -0.043 -0.269 8
0.664 -0.026 -0.189 8
0.598 -0.024 -0.17 9
0.546 -0.098 -0.297 8
0.408 -0.25 -0.569 9
0.207 -0.462 -0.949 8
0.022 -0.661 -1.513 7
-0.039 -0.81 -1.776 10
0.025 -0.882 -1.054 8
0.022 -0.794 -0.948 9
0.112 -0.652 0.234 8
0.105 -0.372 0.852 8
-0.008 -0.316 0.57 9
-0.145 -0.611 -0.178 8
-0.273 -0.972 -0.788 9
-0.413 -1.092 -0.954 8
-0.371 -0.983 -0.858 8
-0.453 -0.817 -0.577 9
-0.366 -0.551 -0.158 6
-0.172 -0.374 -0.088 10
0.009 -0.271 -0.415 9
0.12 -0.224 -0.811 8
0.167 -0.106 -1.123 9
0.15 -0.095 -1.011 8
0.065 0.018 -0.968 8
-0.16 0.029 -0.787 9
-0.276 0.069 -0.627 8
-0.16 0.014 -0.379 9
-0.005 -0.215 -0.32 8
0.074 -0.494 -0.266 8
0.066 -0.445 -0.24 7
0.111 -0.646 0.003 10
0.117 -0.69 0.479 9
0.174 -0.633 1.138 8
0.154 -0.666 1.237 8
-0.084 -0.719 0.691 9
-0.309 -0.627 0.13 8
-0.278 -0.564 0.117 9
-0.296 -0.308 -0.206 8
-0.27 0.045 -0.207 8
-0.282 0.105 -0.087 9
-0.218 -0.133 0.156 8
-0.196 -0.12 0.141 7
-0.225 -0.241 0.43 10
-0.32 -0.183 0.387 8
-0.232 -0.136 0.762 9
-0.004 -0.146 0.887 8
0.154 -0.173 0.82 8
0.207 -0.139 0.854 9
0.203 -0.112 1.267 8
0.182 -0.101 1.14 9
0.109 -0.154 1.686 8
0.03 -0.198 2.136 8
0.047 -0.007 2.174 9
0.197 0.536 1.525 7
0.364 1.116 0.243 10
0.672 1.755 -0.918 8
0.605 1.579 -0.826 8
1.272 2.075 -1.235 9
1.799 2.042 -0.619 8
1.581 1.633 0.332 9
0.678 1.146 0.804 8
-0.371 0.785 1.078 8
-1.107 0.612 1.345 9
-0.996 0.551 1.211 8
-1.145 0.573 1.247 9
-0.657 0.726 0.971 6
0.071 0.994 0.749 10
0.567 1.297 0.995 9
0.722 1.503 1.628 8
0.582 1.527 1.998 9
0.524 1.374 1.798 8
0.227 1.469 1.783 8
0.014 1.689 1.564 9
0.027 1.912 1.113 8
0.242 2.142 0.626 8
0.488 2.288 0.371 9
0.618 2.286 0.486 8
0.556 2.057 0.437 7
0.621 1.935 0.807 10
0.656 1.731 1.131 8
0.639 1.556 1.279 9
0.47 1.578 0.972 8
0.035 1.71 0.062 9
-0.546 1.731 -0.939 8
-0.491 1.558 -0.845 8
-0.824 1.426 -1.507 9
-0.687 1.173 -1.644 8
-0.319 0.78 -1.175 9
-0.031 0.135 -0.43 8
-0.028 0.122 -0.387 7
0.753 -0.596 1.015 10
0.677 -0.537 0.913 8
0.892 -0.642 0.986 9
0.525 -0.62 0.436 8
0.03 -0.532 -0.214 8
-0.408 -0.479 -0.82 9
-0.923 -0.439 -1.399 8
-0.831 -0.395 -1.259 8
-1.463 -0.362 -1.556 9
-1.785 -0.627 -1.478 8
-1.706 -1.104 -1.088 9
-1.57 -1.519 -0.678 6
-1.514 -1.835 -0.64 10
-1.475 -1.932 -1.069 9
-1.327 -1.738 -0.962 8
-1.246 -1.705 -1.721 9
-1.121 -1.58 -2.32 8
-0.717 -1.523 -2.437 8
0.012 -1.706 -2.03 9
0.668 -1.862 -1.153 8
1.158 -1.83 -0.059 9
1.042 -1.647 -0.053 8
1.371 -1.563 0.925 8
1.359 -1.46 1.476 7
1.047 -1.347 1.592 10
0.719 -1.263 1.472 9
0.541 -1.299 1.323 8
0.597 -1.431 1.254 8
0.537 -1.288 1.128 9
0.806 -1.437 1.257 8
1.083 -1.467 1.527 9
1.396 -1.355 1.469 8
1.678 -0.944 0.926 8
2.109 -0.436 0.054 9
2.723 -0.177 -0.997 8
2.451 -0.159 -0.898 7
2.622 0.176 -1.726 10
2.265 0.536 -2.159 8
1.733 0.669 -2.256 9
1.266 0.694 -2.129 8
0.975 0.667 -2.003 8
0.805 0.616 -1.897 9
0.724 0.554 -1.708 8
0.612 0.506 -1.621 9
0.646 0.438 -1.597 8
0.767 0.366 -1.526 8
0.66 0.382 -1.283 9
0.472 0.377 -1.116 7
0.374 0.323 -1.127 10
0.337 0.29 -1.014 8
0.434 0.264 -0.862 8
0.543 0.191 -0.461 9
0.551 0.081 0.05 8
0.677 -0.142 0.569 9
0.921 -0.431 0.975 8
1.094 -0.709 1.097 8
0.984 -0.638 0.988 9
0.96 -0.946 0.678 8
0.854 -1.133 0.117 9
0.644 -1.229 -0.497 6
0.393 -1.294 -0.945 10
0.243 -1.41 -0.859 9
-0.054 -1.621 -0.184 8
-0.049 -1.459 -0.165 8
-0.338 -1.676 0.874 9
-0.067 -1.89 1.836 8
0.709 -1.797 2.287 9
1.48 -1.282 2.137 8
1.811 -0.56 1.632 8
1.63 -0.504 1.469 9
1.62 0.31 1.39 8
1.341 0.966 2.211 7
0.801 1.218 3.659 10
0.049 1.034 5.154 8
-0.804 0.476 6.105 9
-1.333 -0.253 6.29 8
-1.199 -0.228 5.661 9
-0.969 -0.997 5.372 8
0.122 -1.364 5.095 8
1.467 -1.291 4.82 9
2.254 -1.225 4.088 8
2.264 -1.17 2.769 8
1.505 -1.117 0.995 9
1.355 -1.005 0.895 7
0.326 -0.989 -0.75 10
-0.466 -1.044 -1.574 8
-1.158 -1.21 -1.366 8
-1.671 -1.529 -0.553 9
-1.761 -1.604 0.234 8
-1.481 -1.04 0.582 9
-1.333 -0.936 0.523 8
-1.141 -0.12 0.285 8
-1.051 0.098 -0.61 9
-0.971 -0.105 -1.673 8
-1.093 -0.066 -2.266 9
-1.284 0.0 -2.447 6
-1.483 -0.039 -2.396 10
-1.335 -0.035 -2.156 9
-1.756 0.101 -1.904 8
-1.999 0.174 -1.648 9
-1.781 0.012 -1.607 8
-1.427 -0.022 -1.682 8
-0.99 0.027 -1.937 9
-0.631 0.032 -2.377 8
-0.568 0.029 -2.139 9
-0.472 0.084 -2.341 8
-0.638 0.268 -1.962 8
-0.935 0.339 -1.194 7
-1.057 0.22 -0.535 10
-0.903 0.078 -0.207 9
-0.541 -0.001 -0.045 8
-0.487 -0.001 -0.04 8
-0.06 -0.022 0.049 9
0.237 -0.028 0.032 8
0.304 -0.058 -0.196 8
0.0 -0.069 -0.461 9
-0.616 -0.009 -0.393 8
-0.554 -0.008 -0.119 9
-1.105 0.021 -0.107 8
-1.324 -0.048 0.072 7
-1.205 -0.126 0.169 10
-0.802 -0.155 0.195 8
-0.335 -0.169 0.147 9
-0.026 -0.144 -0.053 8
-0.023 -0.129 -0.047 8
0.057 -0.054 -0.369 9
-0.078 -0.003 -0.537 8
-0.331 -0.009 -0.446 9
-0.543 -0.017 -0.202 8
-0.576 -0.004 0.03 8
-0.422 0.009 0.105 9
-0.379 0.008 0.094 6
-0.13 0.063 -0.068 10
0.071 0.234 -0.359 9
0.169 0.444 -0.592 8
0.187 0.557 -0.658 9
0.151 0.544 -0.551 8
0.063 0.398 -0.294 8
0.057 0.358 -0.265 9
-0.055 0.149 0.07 8
-0.14 -0.024 0.307 9
-0.179 -0.119 0.329 8
-0.141 -0.155 0.191 8
-0.059 -0.169 0.073 7
-0.086 -0.1 0.066 10
-0.077 -0.09 0.06 9
-0.196 -0.015 0.123 8
-0.319 0.042 0.228 8
-0.37 0.063 0.322 9
-0.274 -0.001 0.391 8
-0.086 -0.04 0.416 9
0.111 -0.047 0.359 8
0.099 -0.042 0.323 8
0.219 -0.025 0.249 9
0.238 0.019 0.134 8
0.141 0.095 -0.005 7
-0.007 0.142 -0.084 10
-0.088 0.123 -0.102 8
-0.105 0.144 -0.073 9
-0.095 0.13 -0.066 8
-0.035 0.133 0.0 9
0.065 0.048 0.065 8
0.131 -0.001 0.104 8
0.174 0.018 0.098 9
0.206 0.055 0.081 8
0.228 0.016 0.089 8
0.205 0.014 0.08 9
0.226 -0.084 0.106 7
0.234 -0.16 0.134 10
0.217 -0.212 0.168 8
0.178 -0.215 0.184 8
0.153 -0.183 0.148 9
0.228 -0.172 0.107 8
0.205 -0.155 0.097 9
0.367 -0.152 0.078 8
0.451 -0.142 0.084 8
0.358 -0.155 0.137 9
0.189 -0.241 0.205 8
0.072 -0.327 0.207 9
0.064 -0.294 0.187 6
0.014 -0.288 0.118 10
-0.001 -0.189 0.04 9
0.052 -0.14 -0.016 8
0.189 -0.194 -0.079 9
0.282 -0.305 -0.088 8
0.161 -0.329 0.222 8
0.145 -0.296 0.2 9
-0.039 -0.226 0.483 8
-0.085 -0.183 0.279 8
-0.067 -0.116 -0.151 9
-0.066 -0.025 -0.536 8
-0.095 0.054 -0.735 7
-0.123 0.094 -0.694 10
-0.11 0.084 -0.624 8
-0.127 0.086 -0.455 9
-0.131 0.098 -0.325 8
-0.089 0.112 -0.284 9
-0.03 0.114 -0.301 8
-0.011 0.101 -0.322 8
-0.009 0.076 -0.251 9
-0.008 0.068 -0.225 8
0.043 0.02 -0.079 9
0.09 -0.061 0.085 8
0.068 -0.127 0.221 7
0.028 -0.163 0.284 10
-0.013 -0.153 0.277 8
-0.045 -0.067 0.176 9
-0.04 -0.06 0.158 8
-0.061 0.054 -0.016 8
-0.069 0.13 -0.187 9
-0.057 0.162 -0.289 8
-0.021 0.169 -0.28 9
0.039 0.154 -0.187 8
0.165 0.119 -0.071 8
0.149 0.107 -0.063 9
0.307 0.061 0.07 6
0.301 0.0 0.197 10
0.136 -0.134 0.264 9
-0.078 -0.174 0.282 8
-0.337 -0.03 0.281 9
-0.481 0.091 0.261 8
-0.433 0.082 0.235 8
-0.33 0.138 0.118 9
-0.094 0.166 -0.146 8
0.077 0.252 -0.312 9
0.102 0.381 -0.256 8
0.083 0.323 -0.099 8
0.075 0.291 -0.089 7
0.045 0.137 0.073 10
-0.017 0.05 0.167 9
-0.053 -0.017 0.208 8
-0.101 -0.018 0.198 8
-0.155 0.077 0.107 9
-0.194 0.148 0.074 8
-0.175 0.133 0.067 9
-0.251 0.088 0.191 8
-0.333 0.019 0.336 8
-0.375 0.008 0.325 9
-0.336 0.029 0.143 8
-0.193 0.035 -0.093 7
-0.119 0.121 -0.336 10
-0.107 0.109 -0.303 8
-0.106 0.201 -0.393 9
-0.192 0.203 -0.3 8
-0.345 0.154 -0.095 8
-0.432 0.06 0.101 9
-0.496 0.032 0.149 8
-0.512 0.074 0.068 9
-0.461 0.067 0.061 8
-0.396 0.045 0.011 8
-0.302 -0.036 0.016 9
-0.258 -0.075 -0.016 7
-0.17 -0.079 -0.072 10
-0.054 -0.087 -0.145 8
0.013 -0.108 -0.162 8
0.011 -0.097 -0.146 9
-0.041 -0.112 -0.117 8
-0.233 -0.104 -0.097 9
-0.422 -0.091 -0.03 8
-0.565 -0.084 0.061 8
-0.598 -0.077 0.115 9
-0.467 -0.069 0.134 8
-0.42 -0.062 0.121 9
-0.244 -0.049 0.103 6
-0.105 -0.014 0.044 10
-0.028 0.025 -0.037 9
-0.076 0.06 -0.161 8
-0.205 0.054 -0.241 8
-0.34 -0.005 -0.152 9
-0.306 -0.005 -0.137 8
-0.379 -0.056 0.049 9
-0.308 -0.09 0.262 8
-0.157 -0.106 0.481 8
-0.019 -0.094 0.595 9
0.03 -0.059 0.491 8
0.027 -0.053 0.442 7
0.0 0.023 0.232 10
-0.066 0.119 -0.065 8
-0.094 0.172 -0.397 9
-0.022 0.157 -0.6 8
0.124 0.082 -0.652 9
0.25 0.009 -0.475 8
0.225 0.008 -0.428 8
0.262 -0.024 -0.103 9
0.183 -0.042 0.164 8
-0.039 -0.063 0.371 9
-0.351 -0.068 0.521 8
-0.643 -0.046 0.538 7
-0.794 -0.009 0.404 10
-0.715 -0.008 0.364 8
-0.718 0.033 0.158 9
-0.589 0.08 -0.113 8
-0.306 0.119 -0.41 8
0.038 0.092 -0.593 9
0.31 0.011 -0.641 8
0.482 -0.042 -0.593 8
0.434 -0.038 -0.534 9
0.459 -0.055 -0.382 8
0.339 -0.033 -0.106 9
0.184 0.015 0.14 6
0.05 0.064 0.258 10
-0.082 0.078 0.302 9
-0.195 0.044 0.304 8
-0.176 0.04 0.274 9
-0.225 0.003 0.228 8
-0.151 -0.002 0.14 8
0.04 -0.013 0.047 9
0.31 -0.029 -0.05 8
0.523 -0.027 -0.104 9
0.525 -0.003 -0.05 8
0.472 -0.002 -0.045 8
0.266 0.042 0.066 7
-0.057 0.058 0.154 10
-0.347 0.042 0.197 9
-0.49 0.033 0.203 8
-0.488 0.032 0.178 8
-0.394 0.047 0.094 9
-0.355 0.042 0.084 8
-0.22 0.093 -0.072 9
-0.054 0.165 -0.237 8
0.145 0.202 -0.336 8
0.333 0.2 -0.335 9
0.458 0.213 -0.272 8
0.412 0.192 -0.245 7
0.406 0.211 -0.204 10
0.244 0.235 -0.182 8
0.027 0.243 -0.142 9
-0.141 0.184 -0.058 8
-0.197 0.104 0.063 8
-0.148 0.031 0.175 9
-0.133 0.028 0.157 8
-0.082 0.001 0.235 9
-0.048 0.056 0.241 8
0.029 0.031 0.232 8
0.091 0.053 0.194 9
0.171 0.136 0.121 7
0.266 0.137 0.091 10
0.239 0.124 0.082 8
0.233 0.14 0.038 8
0.121 0.165 -0.061 9
-0.06 0.139 -0.175 8
-0.27 0.09 -0.184 9
-0.352 0.011 -0.085 8
-0.215 -0.132 0.038 8
-0.194 -0.119 0.034 9
0.036 -0.233 0.143 8
0.283 -0.266 0.182 8
0.502 -0.233 0.184 7
0.627 -0.147 0.172 10
0.659 -0.038 0.134 9
0.617 0.004 0.062 8
0.555 0.004 0.056 8
0.458 -0.045 -0.008 9
0.281 -0.124 0.011 8
0.087 -0.191 0.079 9
-0.04 -0.271 0.113 8
-0.132 -0.307 0.126 8
-0.188 -0.305 0.125 9
-0.169 -0.274 0.112 8
-0.169 -0.342 0.098 7
# end
#Thu Feb 26 20:28:24 GMT+08:00 20152
