# Supplementary material for: Abnormal Gait Behavior Detection for Elderly Based on Enhanced Wigner-Ville Analysis and Cloud Incremental SVM Learning
Source: Hindawi journal article supplement (doi:10.1155/2016/5869238), 2016-01-01
Supplement: f1 [file 5869238.f1.zip › Supplementary Materials/Original Data/Forward fall Ending on the knees/original__57.txt]

# Accelerometer Values
# filename:  original__57.txt
# Saving start time: Thu Feb 26 20:28:28 GMT+08:00 2015

# sensor resolution: 0.0095825195m/s^2
#Sensorvendor: KIONIX, name: KX023 Accelerometer, type: 1,version : 1, range 39.240005

# X value, Y value, Z value, time diff in ms
-0.016 -0.121 -0.15 9
0.15 -0.028 -0.14 8
0.336 0.014 -0.083 8
0.426 -0.007 0.013 9
0.39 -0.048 0.114 8
0.26 -0.076 0.221 7
0.131 -0.08 0.331 10
0.118 -0.072 0.298 8
0.048 -0.066 0.352 9
0.016 -0.049 0.321 8
-0.006 -0.022 0.259 8
-0.025 -0.011 0.192 9
-0.023 -0.018 0.124 8
0.007 -0.034 0.057 9
0.006 -0.03 0.051 8
0.052 -0.041 -0.023 8
0.08 -0.024 -0.105 9
0.06 0.022 -0.163 7
0.008 0.066 -0.166 10
-0.034 0.083 -0.124 8
-0.062 0.078 -0.082 8
-0.056 0.07 -0.074 9
-0.072 0.06 -0.052 8
-0.092 0.052 -0.056 9
-0.109 0.04 -0.081 8
-0.073 0.032 -0.089 8
-0.013 0.041 -0.08 9
0.007 0.04 -0.077 8
0.006 0.036 -0.069 9
-0.026 0.04 -0.052 6
-0.104 0.051 -0.035 10
-0.185 0.058 -0.036 9
-0.217 0.058 -0.074 8
-0.196 0.055 -0.141 9
-0.154 0.045 -0.188 8
-0.139 0.04 -0.169 8
-0.094 0.031 -0.188 9
-0.015 0.046 -0.189 8
0.079 0.08 -0.186 8
0.132 0.108 -0.198 9
0.135 0.141 -0.214 8
0.122 0.127 -0.193 7
0.098 0.188 -0.199 10
0.086 0.236 -0.185 8
0.104 0.229 -0.137 9
0.118 0.175 -0.069 8
0.098 0.097 -0.002 9
0.052 0.047 0.038 8
0.047 0.074 0.03 8
0.042 0.066 0.027 9
0.001 0.134 -0.022 8
0.052 0.192 -0.096 9
0.087 0.224 -0.182 8
0.085 0.239 -0.245 7
0.062 0.239 -0.289 10
0.055 0.215 -0.26 8
0.037 0.197 -0.261 9
0.053 0.166 -0.187 8
0.096 0.138 -0.08 8
0.114 0.1 0.013 9
0.079 0.057 0.085 8
0.026 0.033 0.156 8
0.023 0.029 0.141 9
-0.002 0.021 0.184 8
-0.001 0.009 0.166 9
0.003 -0.001 0.111 6
-0.002 0.002 0.043 10
-0.017 0.008 -0.016 9
-0.027 0.012 -0.054 8
-0.024 0.01 -0.048 9
-0.032 0.01 -0.06 8
-0.052 0.006 -0.057 8
-0.104 0.019 -0.049 9
-0.189 0.038 -0.02 8
-0.228 0.037 0.015 9
-0.186 0.023 0.036 8
-0.167 0.02 0.033 8
-0.089 -0.001 0.036 7
-0.019 -0.017 0.014 10
0.037 -0.028 -0.03 9
0.093 -0.006 -0.082 8
0.121 0.039 -0.106 8
0.097 0.062 -0.113 9
0.087 0.056 -0.102 8
0.033 0.064 -0.098 8
-0.024 0.062 -0.084 9
-0.07 0.047 -0.09 8
-0.082 0.021 -0.118 9
-0.063 0.0 -0.141 8
-0.057 0.0 -0.127 7
-0.023 -0.027 -0.145 10
0.023 -0.064 -0.193 8
0.081 -0.068 -0.252 9
0.121 -0.026 -0.317 8
0.115 0.029 -0.354 8
0.084 0.057 -0.339 9
0.045 0.062 -0.289 8
0.041 0.056 -0.26 9
0.003 0.037 -0.194 8
-0.041 -0.005 -0.131 8
-0.086 -0.072 -0.098 9
-0.091 -0.17 -0.113 6
-0.049 -0.261 -0.126 11
-0.044 -0.309 -0.056 8
-0.039 -0.278 -0.051 8
0.048 -0.294 0.081 9
0.073 -0.286 0.193 8
0.111 -0.277 0.242 9
0.133 -0.268 0.198 8
0.109 -0.225 0.096 8
0.098 -0.202 0.087 9
0.06 -0.201 -0.088 8
0.038 -0.238 -0.374 8
0.084 -0.239 -0.578 7
0.327 -0.077 -0.434 10
0.472 -0.049 -0.362 9
0.406 -0.207 -0.429 8
0.365 -0.186 -0.386 8
0.347 -0.059 -0.15 9
0.26 0.14 0.114 8
0.16 0.065 0.197 9
0.167 -0.141 0.167 8
0.259 -0.226 0.142 8
0.456 -0.201 0.157 9
0.41 -0.181 0.141 8
0.619 -0.206 -0.015 7
0.68 -0.337 -0.387 10
0.528 -0.469 -0.834 8
0.328 -0.69 -1.187 9
0.397 -0.975 -1.269 8
0.725 -1.186 -1.145 9
0.652 -1.067 -1.031 8
1.005 -1.238 -0.943 8
1.213 -1.37 -0.982 9
1.233 -1.495 -1.157 8
1.039 -1.579 -1.381 8
0.656 -1.57 -1.494 9
0.59 -1.413 -1.344 7
0.149 -1.395 -1.368 10
-0.229 -1.412 -1.385 8
-0.412 -1.453 -1.446 8
-0.388 -1.428 -1.45 9
-0.251 -1.267 -1.388 8
-0.077 -1.064 -1.404 9
0.042 -0.912 -1.405 8
0.038 -0.821 -1.265 8
0.019 -0.652 -0.969 9
-0.116 -0.477 -0.432 8
-0.24 -0.422 0.005 9
-0.285 -0.514 0.19 6
-0.334 -0.677 0.124 10
-0.321 -0.851 -0.016 9
-0.289 -0.766 -0.014 8
-0.081 -0.886 -0.044 9
0.219 -0.722 0.162 8
0.488 -0.291 0.579 8
0.519 0.028 0.767 9
0.371 0.07 0.785 8
0.334 0.063 1.33 9
0.114 0.057 1.197 8
-0.286 0.455 1.982 8
-0.698 0.781 2.119 7
-0.971 0.922 1.66 10
-1.08 1.116 1.153 9
-0.95 1.342 0.887 8
-0.855 1.208 0.798 8
-0.5 1.722 1.026 9
-0.017 2.756 1.761 8
0.553 3.796 2.598 8
1.306 3.95 3.236 9
1.998 3.319 3.73 8
2.268 2.725 4.118 9
2.041 2.452 3.706 8
1.957 1.991 3.835 7
1.528 1.665 3.372 10
0.82 1.645 2.371 8
0.119 1.737 1.354 9
-0.319 1.667 0.594 8
-0.487 1.559 0.214 8
-0.439 1.403 0.192 9
-0.426 1.429 0.208 8
-0.096 1.519 0.43 9
0.289 1.481 0.582 8
0.271 1.141 0.516 8
-0.057 0.728 0.274 9
-0.051 0.655 0.247 6
-0.421 0.364 -0.318 11
-0.549 0.118 -1.367 8
-0.369 0.081 -2.467 8
-0.111 0.526 -2.895 9
-0.115 1.269 -2.28 8
-0.587 1.995 -0.819 8
-1.349 2.481 0.987 9
-1.214 2.233 0.888 8
-2.094 2.34 2.508 9
-2.805 1.978 3.451 8
-2.767 1.272 3.727 8
-1.932 0.296 3.075 7
-0.816 -0.798 1.296 10
0.179 -1.367 -0.845 9
0.161 -1.23 -0.76 8
0.869 -1.278 -2.429 8
1.057 -1.43 -3.477 9
0.668 -1.624 -3.839 8
-0.114 -1.3 -3.159 9
-1.009 -0.445 -1.453 8
-1.537 0.217 0.627 8
-1.383 0.195 0.564 9
-0.887 -0.4 2.15 8
0.48 -1.755 2.896 7
1.781 -2.52 3.003 10
2.606 -2.677 2.762 8
2.936 -2.567 2.249 9
2.642 -2.31 2.024 8
2.472 -2.131 1.107 8
1.794 -1.92 0.001 9
0.944 -1.722 -0.923 8
0.434 -1.583 -1.414 9
0.461 -1.502 -1.409 8
0.96 -1.452 -1.258 8
0.864 -1.306 -1.132 9
1.521 -1.142 -1.121 7
2.046 -0.877 -1.15 10
2.512 -0.909 -1.067 8
2.764 -1.289 -1.034 8
2.497 -1.609 -0.998 9
1.71 -1.551 -0.775 8
1.539 -1.395 -0.697 9
0.561 -1.155 -0.568 8
-0.227 -1.012 -0.636 8
-0.691 -0.993 -0.911 9
-0.923 -1.065 -1.472 8
-0.926 -1.02 -2.022 9
-0.834 -0.918 -1.82 6
-0.667 -0.603 -1.979 10
-0.381 -0.198 -1.501 9
-0.054 0.0 -0.715 8
0.119 -0.184 -0.199 8
0.033 -0.539 -0.031 9
-0.264 -0.712 0.123 8
-0.695 -0.614 0.347 9
-0.625 -0.552 0.312 8
-0.961 -0.287 0.287 8
-0.966 -0.042 -0.064 9
-0.694 0.151 -0.593 8
-0.358 0.308 -1.108 7
-0.096 0.407 -1.372 10
0.13 0.46 -1.347 8
0.117 0.414 -1.212 9
0.311 0.442 -0.973 8
0.403 0.429 -0.452 9
0.478 0.325 0.339 8
0.681 -0.052 1.19 8
0.988 -0.685 1.798 9
1.232 -1.205 2.039 8
1.108 -1.084 1.835 9
0.953 -1.047 1.989 8
0.187 -0.36 2.213 7
-0.79 0.507 2.481 10
-1.517 1.074 2.874 8
-1.907 1.265 3.527 9
-1.906 1.146 4.303 8
-1.715 1.032 3.873 8
-1.314 0.725 4.519 9
-0.615 0.34 4.669 8
0.205 -0.167 4.336 9
0.972 -0.627 3.877 8
1.525 -0.916 3.397 8
1.372 -0.825 3.057 9
1.653 -1.016 2.598 6
1.652 -1.2 2.062 10
1.373 -1.283 1.296 9
0.837 -1.094 0.279 8
0.149 -0.766 -0.868 9
-0.502 -0.496 -1.961 8
-0.452 -0.446 -1.764 8
-0.925 -0.256 -2.595 9
-0.954 -0.046 -2.907 8
-0.634 -0.064 -2.827 9
-0.387 -0.401 -2.528 8
-0.295 -0.753 -2.125 8
-0.266 -0.678 -1.912 7
-0.3 -0.957 -1.657 10
-0.505 -1.167 -1.465 9
-0.796 -1.265 -1.078 8
-1.095 -1.006 -0.384 8
-1.17 -0.664 0.246 9
-0.992 -0.596 0.454 8
-0.839 -0.564 0.169 9
-0.755 -0.507 0.152 8
-0.649 -0.288 -0.505 8
-0.46 0.032 -1.122 9
-0.164 0.248 -1.467 8
0.061 0.364 -1.505 7
0.141 0.375 -1.219 10
0.096 0.204 -0.757 8
0.086 0.184 -0.681 9
-0.029 -0.137 -0.347 8
-0.116 -0.448 -0.194 8
-0.038 -0.692 -0.087 9
0.293 -0.865 0.225 8
0.807 -0.991 0.624 9
1.201 -1.089 0.797 8
1.081 -0.98 0.717 8
1.229 -1.082 0.638 9
1.052 -0.999 0.255 7
0.514 -0.479 -0.35 10
-0.113 0.219 -0.84 8
-0.585 0.655 -1.044 8
-0.863 0.796 -1.196 9
-0.776 0.717 -1.077 8
-0.984 0.782 -1.26 9
-1.127 0.778 -1.274 8
-1.074 0.593 -0.938 8
-0.83 0.332 -0.379 9
-0.47 0.108 0.052 8
-0.117 -0.067 0.261 9
-0.106 -0.061 0.235 6
0.121 -0.156 0.261 10
0.215 -0.142 0.155 9
0.19 -0.007 0.065 8
0.067 0.171 -0.005 8
-0.117 0.324 -0.107 9
-0.105 0.292 -0.096 8
-0.283 0.41 -0.132 9
-0.415 0.438 -0.133 8
-0.569 0.405 -0.217 8
-0.694 0.387 -0.265 9
-0.625 0.373 -0.255 8
-0.563 0.336 -0.229 7
-0.372 0.275 -0.27 10
-0.171 0.102 -0.285 8
0.038 -0.138 -0.193 9
0.15 -0.331 -0.046 8
0.08 -0.43 0.132 9
-0.049 -0.452 0.328 8
-0.136 -0.441 0.49 8
-0.122 -0.397 0.441 9
-0.173 -0.383 0.521 8
-0.173 -0.355 0.503 9
-0.145 -0.326 0.449 8
-0.142 -0.298 0.379 7
-0.159 -0.273 0.313 10
-0.231 -0.291 0.278 8
-0.208 -0.262 0.25 9
-0.279 -0.288 0.22 8
-0.226 -0.25 0.18 8
-0.104 -0.188 0.107 9
-0.017 -0.15 0.037 8
0.011 -0.111 0.014 8
-0.02 -0.071 -0.018 9
-0.018 -0.064 -0.016 8
-0.097 -0.035 -0.08 9
-0.132 -0.002 -0.163 6
-0.069 0.057 -0.221 10
0.012 0.105 -0.299 9
0.057 0.084 -0.375 8
0.076 0.045 -0.312 9
0.069 0.041 -0.28 8
0.065 0.009 -0.14 8
0.044 -0.026 -0.011 9
0.011 -0.052 0.113 8
-0.024 -0.071 0.212 9
-0.044 -0.084 0.254 8
-0.053 -0.085 0.263 8
-0.047 -0.077 0.237 7
-0.031 -0.066 0.226 10
0.02 -0.05 0.195 9
0.062 -0.035 0.106 8
0.067 -0.017 -0.012 8
0.05 -0.012 -0.089 9
0.045 -0.018 -0.085 8
0.041 -0.016 -0.077 8
0.034 -0.023 -0.038 9
0.036 -0.025 -0.005 8
0.039 -0.019 0.011 9
0.039 -0.004 0.0 8
0.035 -0.003 0.0 7
0.032 0.024 -0.007 10
0.024 0.039 -0.032 8
0.007 0.045 -0.065 9
-0.01 0.061 -0.082 8
0.001 0.072 -0.121 8
0.03 0.061 -0.196 9
0.048 0.042 -0.233 8
0.043 0.038 -0.209 9
0.047 0.021 -0.193 8
0.011 0.022 -0.166 8
-0.048 -0.007 -0.111 9
-0.158 -0.043 -0.034 6
-0.242 -0.043 -0.002 11
-0.192 -0.043 0.001 8
-0.172 -0.039 0.0 8
-0.113 -0.034 0.018 9
-0.114 -0.038 0.023 8
-0.148 0.007 0.025 9
-0.142 0.029 0.052 8
-0.055 -0.06 0.04 8
0.034 -0.099 -0.015 9
0.03 -0.089 -0.013 8
0.069 -0.048 -0.011 8
0.081 -0.029 0.015 7
0.068 -0.019 0.045 10
0.023 -0.011 0.126 9
-0.039 -0.015 0.207 8
-0.047 -0.014 0.239 8
-0.042 -0.013 0.215 9
-0.086 0.011 0.214 8
-0.128 0.002 0.168 9
-0.083 -0.043 0.086 8
-0.09 -0.034 0.017 8
-0.078 -0.007 -0.005 9
0.001 0.003 0.019 8
0.001 0.003 0.017 7
0.027 0.057 0.077 10
0.044 0.059 0.123 8
0.091 0.01 0.138 9
0.104 -0.005 0.138 8
0.072 -0.004 0.125 9
0.055 -0.002 0.102 8
0.05 -0.001 0.091 8
0.062 -0.001 0.063 9
0.043 0.002 0.01 8
-0.015 0.001 -0.059 8
-0.108 0.004 -0.083 9
-0.097 0.004 -0.075 7
-0.303 0.015 -0.034 10
-0.272 0.013 -0.03 8
-0.288 0.003 -0.016 8
-0.268 -0.002 -0.065 9
-0.226 -0.01 -0.162 8
-0.173 -0.013 -0.234 9
-0.068 -0.012 -0.266 8
-0.062 -0.01 -0.239 8
-0.014 -0.006 -0.215 9
-0.087 -0.001 -0.172 8
-0.195 -0.005 -0.109 9
-0.285 -0.01 -0.056 6
-0.284 -0.008 -0.074 10
-0.191 -0.002 -0.113 9
-0.171 -0.001 -0.101 8
-0.096 0.008 -0.076 9
-0.044 0.074 -0.031 8
0.072 0.084 0.005 8
0.199 0.015 0.028 9
0.203 0.012 0.048 8
0.137 0.028 0.04 9
0.123 0.025 0.036 8
0.04 0.03 -0.01 8
-0.05 0.021 -0.159 7
-0.08 -0.006 -0.131 10
-0.048 -0.021 0.112 8
-0.007 -0.028 0.207 9
0.046 -0.04 0.217 8
0.041 -0.036 0.195 9
0.033 -0.04 0.206 8
-0.041 -0.024 0.211 8
-0.091 0.002 0.195 9
-0.1 0.041 0.156 8
-0.054 0.079 0.042 9
-0.021 0.092 -0.092 8
-0.019 0.083 -0.083 7
-0.031 0.057 -0.136 10
-0.044 0.011 -0.09 8
-0.064 -0.03 0.022 9
-0.095 -0.066 0.125 8
-0.135 -0.072 0.175 8
-0.127 -0.059 0.162 9
-0.114 -0.053 0.146 8
-0.011 -0.042 0.074 9
0.119 -0.025 -0.024 8
0.189 -0.003 -0.124 8
0.145 0.018 -0.191 9
0.026 0.027 -0.204 6
-0.097 0.023 -0.175 11
-0.087 0.021 -0.157 8
-0.19 0.015 -0.08 8
-0.216 0.003 0.008 9
-0.137 -0.012 0.071 8
-0.018 -0.017 0.115 8
0.084 -0.018 0.124 9
0.106 -0.019 0.119 8
0.095 -0.017 0.107 9
0.022 -0.018 0.116 8
-0.061 -0.021 0.119 8
-0.106 -0.018 0.116 7
-0.101 -0.007 0.091 10
-0.069 0.001 0.022 9
-0.062 0.005 -0.036 8
-0.056 0.004 -0.032 8
0.029 0.004 -0.034 9
0.032 0.001 0.009 8
0.011 -0.01 0.065 9
0.008 -0.029 0.105 8
0.005 -0.041 0.125 8
0.004 -0.037 0.112 9
0.0 -0.053 0.114 8
-0.01 -0.055 0.096 7
-0.006 -0.037 0.065 10
-0.007 -0.012 0.0 8
0.0 0.005 -0.092 9
0.025 0.014 -0.159 8
0.022 0.013 -0.143 8
0.015 0.02 -0.197 9
-0.004 0.022 -0.23 8
-0.017 0.013 -0.184 9
-0.028 0.002 -0.063 8
-0.06 -0.018 0.057 8
-0.148 -0.041 0.13 9
-0.133 -0.037 0.117 7
-0.227 -0.044 0.136 10
-0.243 -0.036 0.126 8
-0.169 -0.009 0.019 8
-0.028 0.032 -0.178 9
0.139 0.112 -0.381 8
0.257 0.202 -0.505 9
0.231 0.182 -0.455 8
0.216 0.232 -0.463 8
0.096 0.207 -0.422 9
-0.055 0.116 -0.248 8
-0.188 0.028 0.014 9
-0.26 -0.033 0.148 6
-0.256 -0.065 0.18 10
-0.231 -0.059 0.162 9
-0.208 -0.067 0.159 8
-0.143 -0.054 0.098 8
0.012 -0.032 -0.05 9
0.134 -0.018 -0.106 8
0.052 -0.017 0.032 9
-0.159 -0.037 0.168 8
-0.143 -0.033 0.152 8
-0.353 -0.07 0.221 9
-0.536 -0.07 0.246 8
-0.549 -0.079 0.248 7
-0.42 -0.092 0.227 10
-0.22 -0.08 0.139 8
-0.032 -0.059 -0.007 9
-0.028 -0.053 -0.006 8
0.018 -0.022 -0.045 9
-0.035 -0.008 0.058 8
-0.065 -0.036 0.161 8
-0.066 -0.13 0.371 9
-0.211 -0.121 0.474 8
-0.19 -0.109 0.426 9
-0.386 -0.015 0.24 8
-0.464 0.082 -0.002 7
-0.461 0.133 -0.106 10
-0.544 0.119 -0.111 8
-0.649 0.163 -0.161 9
-0.56 0.159 -0.147 8
-0.504 0.143 -0.132 8
-0.276 0.085 -0.036 9
-0.047 0.052 0.041 8
0.075 0.038 0.072 9
0.079 0.034 0.055 8
-0.003 0.02 0.034 8
-0.179 0.002 0.048 9
-0.161 0.002 0.043 6
-0.359 -0.015 0.053 10
-0.454 -0.031 0.053 9
-0.463 -0.022 0.052 8
-0.334 0.001 0.013 9
-0.093 0.021 -0.086 8
0.123 0.065 -0.171 8
0.11 0.059 -0.154 9
0.262 0.076 -0.172 8
0.292 0.04 -0.173 9
0.186 -0.011 -0.124 8
-0.001 -0.075 -0.02 8
-0.223 -0.171 0.119 7
-0.406 -0.193 0.226 10
-0.365 -0.173 0.203 9
-0.385 -0.178 0.188 8
-0.203 -0.207 0.134 8
0.065 -0.188 0.083 9
0.302 -0.204 0.01 8
0.481 -0.251 -0.052 9
0.619 -0.276 -0.053 8
0.557 -0.248 -0.048 8
0.64 -0.268 0.0 9
0.637 -0.3 0.065 8
0.485 -0.34 0.169 7
0.241 -0.359 0.38 10
0.071 -0.374 0.602 8
0.067 -0.409 0.688 9
0.061 -0.368 0.619 8
0.257 -0.409 0.667 8
0.541 -0.438 0.72 9
0.742 -0.427 0.706 8
0.827 -0.371 0.669 9
0.835 -0.317 0.62 8
0.751 -0.285 0.547 8
0.719 -0.256 0.492 9
# end
#Thu Feb 26 20:28:33 GMT+08:00 20152
