# Supplementary material for: Abnormal Gait Behavior Detection for Elderly Based on Enhanced Wigner-Ville Analysis and Cloud Incremental SVM Learning
Source: Hindawi journal article supplement (doi:10.1155/2016/5869238), 2016-01-01
Supplement: f1 [file 5869238.f1.zip › Supplementary Materials/Original Data/Forward fall Ending on the knees/original__58.txt]

# Accelerometer Values
# filename:  original__58.txt
# Saving start time: Thu Feb 26 20:28:38 GMT+08:00 2015

# sensor resolution: 0.0095825195m/s^2
#Sensorvendor: KIONIX, name: KX023 Accelerometer, type: 1,version : 1, range 39.240005

# X value, Y value, Z value, time diff in ms
-0.06 -0.048 -0.169 8
-0.054 -0.044 -0.152 9
0.101 -0.062 -0.122 8
0.112 -0.052 -0.073 7
0.106 -0.042 -0.019 10
0.098 -0.044 0.026 8
0.085 -0.046 0.055 9
0.077 -0.041 0.049 8
0.069 -0.027 0.063 9
0.073 -0.004 0.052 8
0.067 0.01 0.021 8
0.046 0.02 -0.024 9
0.039 0.024 -0.07 8
0.052 0.01 -0.088 9
0.047 0.009 -0.079 8
0.058 -0.009 -0.061 7
0.057 -0.02 -0.011 10
0.05 -0.028 0.042 8
0.04 -0.053 0.078 9
0.024 -0.073 0.089 8
0.006 -0.056 0.092 8
0.006 -0.051 0.082 9
-0.005 -0.014 0.086 8
-0.016 0.008 0.068 9
-0.025 0.008 0.038 8
-0.037 0.0 0.015 8
-0.03 -0.009 -0.001 9
-0.027 -0.008 -0.001 6
0.018 -0.019 -0.006 10
0.087 -0.028 0.006 9
0.139 -0.049 0.028 8
0.147 -0.083 0.059 9
0.115 -0.116 0.087 8
0.09 -0.141 0.11 8
0.12 -0.156 0.127 9
0.108 -0.141 0.115 8
0.162 -0.156 0.095 9
0.164 -0.156 0.061 8
0.104 -0.12 0.034 8
0.046 -0.065 -0.007 7
0.03 -0.007 -0.065 10
0.046 0.051 -0.112 9
0.042 0.046 -0.1 8
0.049 0.078 -0.114 8
0.009 0.077 -0.095 9
-0.047 0.054 -0.057 8
-0.091 -0.003 -0.02 9
-0.104 -0.051 0.004 8
-0.094 -0.067 0.02 8
-0.085 -0.06 0.018 9
0.05 -0.051 0.02 8
0.08 -0.007 0.015 7
0.053 0.022 0.0 10
0.024 0.003 -0.024 8
0.028 -0.058 -0.041 9
0.025 -0.052 -0.037 8
0.046 -0.124 -0.038 8
0.056 -0.171 -0.024 9
0.043 -0.202 -0.012 8
0.003 -0.205 -0.003 9
-0.057 -0.184 0.01 8
-0.117 -0.153 0.019 8
-0.105 -0.138 0.017 9
-0.157 -0.094 0.008 6
-0.222 -0.057 -0.018 11
-0.279 -0.056 -0.054 8
-0.275 -0.084 -0.075 8
-0.203 -0.116 -0.073 9
-0.098 -0.138 -0.049 8
-0.088 -0.124 -0.044 9
0.012 -0.147 -0.009 8
0.09 -0.176 0.019 8
0.143 -0.224 0.041 9
0.181 -0.293 0.067 8
0.198 -0.328 0.092 8
0.178 -0.295 0.083 7
0.184 -0.278 0.09 10
0.183 -0.229 0.073 9
0.193 -0.178 0.054 8
0.221 -0.147 0.042 8
0.252 -0.14 0.039 9
0.29 -0.157 0.046 8
0.34 -0.162 0.056 9
0.306 -0.146 0.051 8
0.358 -0.113 0.051 8
0.369 -0.047 0.02 9
0.319 0.057 -0.052 8
0.244 0.196 -0.162 7
0.181 0.317 -0.288 10
0.143 0.39 -0.334 8
0.129 0.351 -0.3 9
0.109 0.362 -0.199 8
0.106 0.284 0.011 9
0.118 0.148 0.314 8
0.121 -0.001 0.625 8
0.107 -0.146 0.802 9
0.096 -0.131 0.722 8
0.068 -0.26 0.751 8
0.038 -0.337 0.683 9
0.01 -0.345 0.579 7
-0.009 -0.326 0.51 10
-0.011 -0.322 0.51 8
-0.003 -0.334 0.529 9
-0.003 -0.301 0.476 8
-0.009 -0.307 0.479 8
-0.013 -0.305 0.448 9
-0.015 -0.291 0.342 8
-0.023 -0.269 0.151 8
-0.042 -0.246 -0.029 9
-0.075 -0.224 -0.132 8
-0.067 -0.202 -0.119 9
-0.11 -0.189 -0.152 6
-0.153 -0.182 -0.125 10
-0.171 -0.177 -0.082 9
-0.162 -0.169 -0.054 8
-0.143 -0.166 -0.049 9
-0.129 -0.167 -0.078 8
-0.116 -0.151 -0.07 8
-0.109 -0.145 -0.111 9
-0.093 -0.138 -0.163 8
-0.045 -0.142 -0.238 9
0.028 -0.145 -0.34 8
0.087 -0.127 -0.443 8
0.079 -0.114 -0.399 7
0.101 -0.076 -0.498 10
0.106 -0.055 -0.622 8
0.123 -0.088 -0.782 9
0.173 -0.167 -0.974 8
0.245 -0.276 -1.114 9
0.294 -0.44 -1.123 8
0.314 -0.607 -0.994 8
0.283 -0.547 -0.895 9
0.273 -0.662 -0.691 8
0.211 -0.744 -0.537 9
0.125 -0.801 -0.54 8
0.072 -0.83 -0.655 7
0.089 -0.829 -0.847 10
0.08 -0.825 -1.042 8
0.17 -0.742 -0.937 9
0.252 -0.851 -1.129 8
0.336 -1.009 -1.242 8
0.418 -1.074 -1.214 9
0.446 -1.076 -1.154 8
0.377 -1.084 -1.073 9
0.339 -0.976 -0.966 8
0.131 -1.014 -0.882 8
-0.111 -1.013 -0.793 9
-0.277 -0.997 -0.74 6
-0.34 -1.018 -0.819 11
-0.314 -0.928 -1.014 8
-0.254 -0.662 -1.182 8
-0.229 -0.596 -1.064 9
-0.12 -0.356 -1.101 8
0.03 -0.217 -0.964 8
0.1 -0.016 -0.67 9
0.1 0.095 -0.509 8
0.198 0.151 -0.574 9
0.388 0.496 -0.471 8
0.349 0.446 -0.424 8
0.288 0.759 -0.204 7
0.001 0.844 -0.036 10
-0.162 1.009 0.236 9
-0.139 1.199 0.605 8
0.046 1.249 0.788 8
0.238 1.267 0.739 9
0.214 1.14 0.665 8
0.244 1.196 0.631 9
0.039 1.292 0.731 8
-0.379 1.319 0.969 8
-0.823 1.186 1.317 9
-1.091 1.128 1.723 8
-0.981 1.015 1.55 7
-1.162 1.06 1.745 10
-1.309 0.841 1.873 8
-1.473 0.748 1.74 9
-1.578 1.211 1.327 8
-1.456 1.719 1.022 8
-1.24 1.988 0.569 9
-1.052 2.23 0.128 8
-0.947 2.007 0.115 9
-0.793 2.352 0.051 8
-0.529 2.687 0.204 8
-0.242 2.832 0.167 9
-0.061 2.659 -0.083 7
0.031 2.167 -0.244 10
0.028 1.95 -0.024 8
0.035 1.755 -0.021 8
0.016 0.891 0.583 9
0.024 0.619 1.357 8
0.122 0.303 2.173 9
0.361 0.128 2.868 8
0.696 0.244 3.242 8
0.627 0.22 2.918 9
1.053 0.508 3.028 8
1.536 0.663 2.754 9
1.802 0.606 2.218 6
1.533 0.442 1.76 10
0.739 0.181 1.511 9
-0.32 -0.237 1.375 8
-0.288 -0.213 1.237 9
-1.295 -0.76 1.253 8
-2.007 -1.168 1.551 8
-2.169 -1.2 1.921 9
-1.713 -1.139 2.07 8
-0.916 -1.408 1.818 8
-0.037 -1.573 1.254 9
-0.034 -1.415 1.129 8
0.679 -1.24 0.661 7
1.119 -1.194 0.621 10
1.359 -1.312 0.795 8
1.486 -1.4 0.943 9
1.557 -1.56 1.229 8
1.648 -1.805 1.406 9
1.483 -1.625 1.266 8
1.62 -1.786 1.015 8
1.684 -1.737 0.336 9
1.688 -1.543 -0.579 8
1.74 -1.352 -1.416 9
1.762 -1.192 -1.922 8
1.586 -1.073 -1.73 7
1.396 -0.936 -1.713 10
0.858 -0.841 -1.353 8
0.173 -0.793 -1.027 9
-0.212 -0.723 -0.793 8
-0.15 -0.564 -0.922 8
0.185 -0.352 -1.656 9
0.568 -0.101 -2.565 8
0.511 -0.091 -2.309 9
0.817 0.228 -2.942 8
0.939 0.529 -3.357 8
0.848 0.591 -3.686 9
0.62 0.428 -3.718 6
0.209 0.261 -3.341 10
-0.208 0.115 -2.742 9
-0.188 0.103 -2.467 8
-0.191 -0.046 -2.034 9
0.266 -0.168 -2.027 8
0.914 -0.215 -2.28 8
1.416 -0.143 -2.402 9
1.681 -0.044 -2.092 8
1.725 -0.105 -1.552 9
1.552 -0.094 -1.396 8
1.316 -0.273 -0.999 8
0.846 -0.434 -0.566 7
0.295 -0.541 -0.036 10
-0.143 -0.695 0.463 9
-0.333 -0.948 0.783 8
-0.346 -1.156 0.837 8
-0.312 -1.041 0.753 9
-0.291 -0.977 0.904 8
-0.285 -0.768 1.266 9
-0.273 -0.677 1.718 8
-0.214 -0.732 2.218 8
-0.198 -0.76 2.721 9
-0.178 -0.684 3.205 8
-0.215 -0.615 2.884 7
-0.212 -0.019 3.207 10
-0.328 0.469 3.231 8
-0.717 1.055 3.081 9
-1.255 1.508 2.871 8
-1.682 1.701 2.679 8
-1.514 1.53 2.411 9
-1.649 1.5 2.408 8
-1.534 1.248 2.709 9
-1.318 0.956 3.218 8
-0.985 0.68 3.688 8
-0.547 0.345 3.931 9
-0.493 0.311 3.538 7
0.01 -0.114 3.521 10
0.608 -0.671 3.262 8
1.192 -1.175 2.733 8
1.612 -1.316 1.915 9
1.821 -1.067 0.837 8
1.926 -0.606 -0.441 9
1.955 -0.107 -1.648 8
1.76 -0.096 -1.483 8
1.664 0.229 -2.433 9
1.398 0.215 -3.133 8
0.956 -0.085 -3.442 9
0.43 -0.56 -3.134 6
-0.048 -1.024 -2.441 10
-0.536 -1.368 -1.812 9
-0.483 -1.231 -1.631 8
-0.929 -1.456 -1.186 8
-1.16 -1.467 -0.775 9
-1.208 -1.372 -0.383 8
-1.202 -1.182 -0.128 9
-1.119 -0.889 0.197 8
-0.818 -0.692 0.564 8
-0.736 -0.622 0.508 9
-0.255 -0.666 0.504 8
0.206 -0.876 0.097 7
0.481 -1.034 -0.531 10
0.544 -1.03 -1.233 8
0.452 -0.854 -1.767 9
0.303 -0.627 -1.959 8
0.273 -0.564 -1.763 9
0.136 -0.514 -1.699 8
0.049 -0.532 -1.398 8
-0.022 -0.505 -0.887 9
-0.092 -0.515 -0.247 8
-0.158 -0.568 0.294 9
-0.263 -0.652 0.449 8
-0.237 -0.587 0.404 7
-0.368 -0.592 0.314 10
-0.406 -0.497 0.171 8
-0.39 -0.486 -0.056 9
-0.443 -0.501 -0.377 8
-0.371 -0.341 -0.492 8
-0.172 -0.092 -0.242 9
-0.155 -0.083 -0.217 8
-0.028 -0.034 0.201 8
0.052 -0.288 0.533 9
-0.036 -0.573 0.726 8
-0.332 -0.687 0.915 9
-0.299 -0.618 0.948 6
-0.998 -0.597 0.667 10
-0.898 -0.537 0.6 9
-1.018 -0.196 0.249 8
-0.956 0.122 -0.053 9
-0.684 0.207 -0.37 8
-0.21 0.153 -0.407 8
0.35 0.01 -0.146 9
0.853 -0.315 0.234 8
0.767 -0.284 0.21 9
1.114 -0.64 0.563 8
1.167 -0.826 0.608 8
0.902 -0.829 0.399 7
0.425 -0.727 0.255 10
-0.079 -0.626 0.164 9
-0.071 -0.563 0.147 8
-0.473 -0.502 -0.009 8
-0.744 -0.439 -0.123 9
-0.822 -0.321 -0.201 8
-0.665 -0.131 -0.29 8
-0.346 0.1 -0.336 9
0.011 0.255 -0.338 8
0.01 0.229 -0.304 9
0.268 0.187 -0.278 8
0.334 0.013 -0.191 7
0.181 -0.121 -0.119 10
-0.052 -0.118 -0.084 8
-0.18 -0.017 -0.112 9
-0.161 0.116 -0.236 8
-0.145 0.104 -0.212 8
0.023 0.279 -0.356 9
0.167 0.444 -0.477 8
0.233 0.518 -0.456 9
0.152 0.49 -0.321 8
-0.118 0.415 -0.139 8
-0.37 0.29 0.07 9
-0.333 0.261 0.063 6
-0.455 0.17 0.189 11
-0.393 0.148 0.237 8
-0.146 0.074 0.218 8
0.19 0.046 0.167 9
0.451 0.117 0.09 8
0.49 0.193 -0.028 9
0.441 0.173 -0.025 8
0.237 0.227 -0.115 8
-0.058 0.237 -0.109 9
-0.322 0.212 -0.051 8
-0.428 0.178 0.021 8
-0.391 0.138 0.085 7
-0.31 0.086 0.106 10
-0.279 0.077 0.096 9
-0.171 0.056 0.072 8
-0.081 0.083 -0.047 8
0.004 0.044 -0.193 9
0.014 0.019 -0.211 8
-0.051 0.056 -0.095 9
-0.103 0.062 0.017 8
-0.092 0.056 0.015 8
-0.126 0.066 0.076 9
-0.148 0.071 0.105 8
-0.145 0.069 0.054 7
-0.095 0.062 -0.084 10
-0.007 0.053 -0.233 8
0.081 0.042 -0.386 9
0.073 0.038 -0.348 8
0.179 0.027 -0.479 9
0.244 0.027 -0.517 8
0.203 0.034 -0.458 8
0.132 0.03 -0.299 9
0.096 0.029 -0.086 8
0.131 0.032 0.082 8
0.118 0.029 0.074 9
0.206 0.019 0.182 7
0.303 -0.001 0.261 10
0.335 -0.027 0.292 8
0.279 -0.073 0.278 8
0.183 -0.111 0.257 9
0.055 -0.089 0.237 8
0.049 -0.08 0.213 9
-0.1 -0.029 0.177 8
-0.208 0.012 0.148 8
-0.254 0.029 0.142 9
-0.253 0.026 0.135 8
-0.216 0.0 0.123 9
-0.194 0.0 0.11 6
-0.088 -0.028 0.07 10
0.071 -0.027 -0.006 9
0.176 -0.011 -0.094 8
0.149 -0.001 -0.144 9
0.009 -0.003 -0.118 8
-0.136 0.0 -0.022 8
-0.123 0.0 -0.02 9
-0.26 -0.023 0.042 8
-0.37 -0.119 0.073 9
-0.482 -0.136 0.136 8
-0.511 -0.061 0.154 8
-0.366 -0.002 0.049 7
-0.207 0.045 -0.056 10
-0.186 0.04 -0.05 8
-0.079 0.064 -0.051 9
-0.018 0.064 -0.008 8
0.004 0.043 0.048 9
0.0 0.016 0.101 8
-0.044 -0.016 0.118 8
-0.142 -0.063 0.049 9
-0.127 -0.057 0.044 8
-0.24 -0.052 -0.014 9
-0.351 -0.008 0.019 8
-0.398 -0.01 0.046 7
-0.314 -0.011 0.041 10
-0.131 -0.004 0.013 8
0.05 -0.002 -0.032 9
0.045 -0.002 -0.029 8
0.145 0.011 -0.104 8
0.182 0.024 -0.205 9
0.165 0.036 -0.295 8
0.125 0.04 -0.365 9
0.098 0.032 -0.385 8
0.1 0.021 -0.303 8
0.09 0.019 -0.273 9
0.118 0.001 -0.15 6
0.173 -0.02 0.006 11
0.239 -0.037 0.158 8
0.279 -0.063 0.228 8
0.265 -0.083 0.245 9
0.218 -0.09 0.229 8
0.196 -0.081 0.206 8
0.156 -0.057 0.14 9
0.164 -0.002 0.014 8
0.234 0.04 -0.069 9
0.247 0.06 -0.035 8
0.15 0.033 0.058 8
0.135 0.03 0.052 7
0.01 -0.055 0.126 10
-0.075 -0.153 0.188 9
-0.11 -0.185 0.267 8
-0.114 -0.201 0.308 8
-0.106 -0.201 0.283 9
-0.077 -0.156 0.22 8
-0.055 -0.072 0.143 9
-0.05 -0.064 0.129 8
-0.07 0.042 0.016 8
-0.103 0.102 -0.144 9
-0.14 0.126 -0.252 8
-0.177 0.14 -0.327 7
-0.169 0.144 -0.422 10
-0.09 0.162 -0.343 8
-0.081 0.146 -0.309 9
-0.046 0.151 -0.15 8
-0.153 0.125 -0.096 8
-0.31 0.11 -0.01 9
-0.403 0.127 0.084 8
-0.429 0.147 0.055 9
-0.357 0.127 -0.064 8
-0.321 0.114 -0.057 8
-0.15 0.089 -0.064 9
-0.006 0.087 -0.008 7
-0.034 0.075 -0.03 10
-0.208 0.047 -0.118 8
-0.402 0.024 -0.183 8
-0.576 0.011 -0.092 9
-0.519 0.01 -0.082 8
-0.671 -0.003 0.061 9
-0.721 -0.034 0.136 8
-0.626 -0.054 0.17 8
-0.474 -0.035 0.198 9
-0.342 0.0 0.296 8
-0.322 0.045 0.239 9
-0.29 0.041 0.215 6
-0.337 0.007 -0.113 10
-0.407 -0.049 -0.371 9
-0.428 -0.023 -0.425 8
-0.305 0.01 -0.268 9
-0.218 0.027 -0.13 8
-0.207 0.015 -0.102 8
-0.187 0.013 -0.092 9
-0.267 -0.019 0.036 8
-0.503 -0.138 0.183 8
-0.76 -0.221 0.282 9
-0.799 -0.234 0.279 8
-0.719 -0.21 0.251 7
-0.435 -0.131 0.192 10
-0.391 -0.118 0.173 8
0.303 -0.04 0.144 9
0.697 0.009 0.201 8
0.944 0.026 0.243 9
0.97 0.023 0.319 8
0.867 -0.035 0.524 8
0.78 -0.031 0.717 9
0.491 -0.084 0.645 8
0.148 -0.087 0.682 9
-0.101 -0.113 0.551 8
-0.173 -0.16 0.415 7
-0.013 -0.218 0.345 10
0.295 -0.27 0.407 8
0.266 -0.243 0.366 9
0.578 -0.286 0.502 8
0.85 -0.311 0.577 8
# end
#Thu Feb 26 20:28:42 GMT+08:00 20150
