# Supplementary material for: Abnormal Gait Behavior Detection for Elderly Based on Enhanced Wigner-Ville Analysis and Cloud Incremental SVM Learning
Source: Hindawi journal article supplement (doi:10.1155/2016/5869238), 2016-01-01
Supplement: f1 [file 5869238.f1.zip › Supplementary Materials/Original Data/Forward fall Ending on the knees/original__59.txt]

# Accelerometer Values
# filename:  original__59.txt
# Saving start time: Thu Feb 26 20:28:45 GMT+08:00 2015

# sensor resolution: 0.0095825195m/s^2
#Sensorvendor: KIONIX, name: KX023 Accelerometer, type: 1,version : 1, range 39.240005

# X value, Y value, Z value, time diff in ms
0.076 0.129 0.034 8
0.16 0.188 0.005 8
0.155 0.206 0.01 9
0.086 0.188 0.03 8
-0.01 0.139 0.055 9
-0.009 0.125 0.05 6
-0.069 0.058 0.049 10
-0.062 0.002 0.001 9
-0.003 -0.031 -0.075 8
0.074 -0.035 -0.147 8
0.156 -0.011 -0.172 9
0.205 -0.003 -0.138 8
0.179 -0.04 -0.056 9
0.161 -0.036 -0.05 8
0.088 -0.098 0.068 8
-0.011 -0.127 0.17 9
-0.076 -0.122 0.249 8
-0.082 -0.112 0.277 7
-0.078 -0.096 0.234 10
-0.053 -0.105 0.192 8
-0.047 -0.094 0.173 9
0.002 -0.15 0.134 8
0.072 -0.196 0.061 9
0.142 -0.196 -0.056 8
0.167 -0.169 -0.188 8
0.133 -0.126 -0.341 9
0.06 -0.057 -0.521 8
0.054 -0.051 -0.469 8
-0.068 0.045 -0.589 9
-0.213 0.128 -0.557 7
-0.282 0.133 -0.383 10
-0.237 0.065 -0.142 8
-0.111 -0.019 0.107 8
0.037 -0.088 0.32 9
0.034 -0.079 0.288 8
0.155 -0.079 0.367 9
0.237 -0.033 0.302 8
0.287 0.011 0.205 8
0.282 0.027 0.116 9
0.202 0.013 0.036 8
0.048 0.026 -0.025 9
0.043 0.024 -0.022 6
-0.145 0.049 -0.055 10
-0.278 0.087 -0.05 9
-0.262 0.121 -0.051 8
-0.126 0.13 -0.091 9
0.032 0.143 -0.148 8
0.213 0.159 -0.183 8
0.192 0.143 -0.165 9
0.386 0.161 -0.148 8
0.48 0.158 -0.088 9
0.428 0.148 -0.017 8
0.262 0.151 0.039 8
0.235 0.136 0.035 7
0.024 0.134 0.131 10
-0.176 0.122 0.117 9
-0.323 0.106 0.134 8
-0.377 0.094 0.098 8
-0.355 0.098 0.01 9
-0.25 0.112 -0.081 8
-0.052 0.119 -0.154 8
-0.047 0.107 -0.139 9
0.14 0.102 -0.172 8
0.193 0.089 -0.116 9
0.13 0.075 0.007 8
0.043 0.047 0.133 7
-0.016 -0.003 0.236 10
-0.075 -0.045 0.273 8
-0.067 -0.04 0.245 9
-0.154 -0.044 0.198 8
-0.213 -0.041 0.096 8
-0.175 -0.048 -0.008 9
-0.087 -0.041 -0.089 8
-0.002 -0.038 -0.124 9
0.088 -0.03 -0.117 8
0.079 -0.027 -0.105 8
0.151 0.005 -0.069 9
0.173 0.038 -0.021 6
0.147 0.048 0.015 11
0.082 0.054 0.044 8
0.033 0.061 0.058 8
0.033 0.063 0.041 9
0.029 0.056 0.037 8
0.059 0.052 0.003 8
0.095 0.041 -0.031 9
0.135 0.028 -0.062 8
0.177 0.027 -0.079 9
0.215 0.034 -0.071 8
0.243 0.034 -0.04 8
0.218 0.031 -0.036 7
0.217 0.028 -0.001 10
0.158 0.02 0.042 9
0.064 0.008 0.099 8
-0.012 -0.02 0.118 8
-0.025 -0.065 0.077 9
0.0 -0.078 0.009 8
0.0 -0.07 0.008 9
0.026 -0.047 -0.054 8
0.051 -0.017 -0.092 8
0.085 -0.004 -0.094 9
0.115 0.001 -0.066 8
0.103 0.001 -0.059 7
0.085 0.037 0.024 10
0.077 0.034 0.021 8
0.034 0.029 0.059 9
-0.019 0.013 0.065 8
-0.072 -0.012 0.043 9
-0.125 -0.029 0.024 8
-0.178 -0.031 0.013 8
-0.19 -0.033 0.0 9
-0.171 -0.029 0.0 8
-0.138 -0.012 -0.026 8
-0.078 0.018 -0.055 9
-0.009 0.043 -0.066 7
0.046 0.059 -0.046 10
0.089 0.064 -0.012 8
0.08 0.058 -0.011 8
0.101 0.05 0.01 9
0.082 0.035 0.018 8
0.03 0.015 0.015 9
-0.036 -0.019 0.008 8
-0.08 -0.05 0.003 8
-0.09 -0.057 -0.009 9
-0.081 -0.051 -0.008 8
-0.057 -0.046 -0.021 9
-0.04 -0.021 -0.028 6
-0.068 0.013 -0.02 10
-0.093 0.031 -0.006 9
-0.081 0.024 0.004 8
-0.056 0.001 0.006 9
-0.05 0.001 0.006 8
-0.024 -0.029 -0.004 8
0.01 -0.055 -0.023 9
0.033 -0.061 -0.045 8
0.053 -0.044 -0.071 9
0.083 -0.016 -0.101 8
0.104 0.013 -0.12 8
0.094 0.012 -0.108 7
0.101 0.04 -0.098 10
0.108 0.055 -0.069 8
0.122 0.052 -0.034 9
0.133 0.036 0.0 8
0.122 0.01 0.028 9
0.086 -0.01 0.044 8
0.077 -0.009 0.04 8
0.049 -0.036 0.044 9
0.041 -0.065 0.039 8
0.052 -0.073 0.048 9
0.068 -0.072 0.069 8
0.072 -0.063 0.087 7
0.059 -0.054 0.093 10
0.053 -0.049 0.084 8
0.031 -0.056 0.082 9
0.018 -0.071 0.069 8
-0.001 -0.085 0.044 8
-0.03 -0.092 0.015 9
-0.035 -0.09 -0.014 8
-0.024 -0.063 -0.023 9
-0.021 -0.056 -0.021 8
-0.007 -0.004 -0.008 8
0.009 0.017 0.011 9
0.009 0.014 0.035 6
-0.02 0.011 0.057 10
-0.057 -0.005 0.071 9
-0.072 -0.035 0.064 8
-0.064 -0.031 0.057 9
-0.07 -0.045 0.039 8
-0.07 -0.035 0.014 8
-0.071 -0.009 -0.015 9
-0.091 0.023 -0.036 8
-0.102 0.046 -0.041 9
-0.092 0.041 -0.037 8
-0.071 0.042 -0.033 8
-0.029 0.039 -0.033 7
0.017 0.025 -0.012 10
0.063 0.001 0.013 9
0.123 -0.016 0.04 8
0.193 -0.037 0.067 8
0.173 -0.033 0.06 9
0.21 -0.058 0.09 8
0.203 -0.053 0.108 9
0.181 -0.026 0.094 8
0.16 -0.026 0.053 8
0.135 -0.047 -0.001 9
0.102 -0.049 -0.049 8
0.092 -0.044 -0.044 7
0.061 -0.04 -0.076 10
0.043 -0.066 -0.089 8
0.033 -0.097 -0.088 9
0.02 -0.125 -0.078 8
-0.004 -0.138 -0.067 8
-0.029 -0.138 -0.063 9
-0.026 -0.124 -0.057 8
-0.035 -0.124 -0.062 9
-0.03 -0.121 -0.068 8
-0.013 -0.112 -0.063 8
0.003 -0.106 -0.057 9
0.01 -0.1 -0.058 7
-0.004 -0.097 -0.057 10
-0.003 -0.087 -0.051 8
-0.022 -0.111 -0.043 8
-0.046 -0.141 -0.037 9
-0.088 -0.151 -0.028 8
-0.128 -0.135 -0.019 9
-0.137 -0.115 -0.031 8
-0.102 -0.1 -0.056 8
-0.091 -0.09 -0.05 9
-0.038 -0.069 -0.083 8
0.005 -0.036 -0.107 9
0.04 -0.013 -0.096 6
0.086 -0.043 -0.057 10
0.124 -0.103 -0.01 9
0.131 -0.16 0.044 8
0.118 -0.144 0.04 8
0.099 -0.208 0.086 9
0.066 -0.273 0.124 8
0.041 -0.311 0.167 9
0.036 -0.312 0.198 8
0.059 -0.289 0.186 8
0.105 -0.258 0.125 9
0.094 -0.232 0.113 8
0.145 -0.205 0.04 7
0.184 -0.193 -0.019 10
0.196 -0.197 -0.063 8
0.168 -0.224 -0.067 9
0.12 -0.252 -0.035 8
0.075 -0.265 0.04 9
0.068 -0.239 0.036 8
0.012 -0.244 0.172 8
-0.038 -0.247 0.297 9
-0.069 -0.247 0.373 8
-0.065 -0.235 0.376 9
-0.031 -0.221 0.271 8
-0.028 -0.199 0.244 7
0.037 -0.194 0.081 10
0.115 -0.192 -0.062 8
0.172 -0.196 -0.177 9
0.227 -0.2 -0.24 8
0.268 -0.218 -0.213 8
0.305 -0.282 -0.117 9
0.274 -0.254 -0.105 8
0.284 -0.323 -0.001 8
0.217 -0.435 -0.042 9
0.114 -0.573 -0.108 8
-0.008 -0.598 -0.033 9
-0.085 -0.571 0.066 6
0.0 -0.564 0.178 10
0.0 -0.508 0.16 9
0.218 -0.514 0.13 8
0.453 -0.517 -0.017 9
0.611 -0.472 -0.081 8
0.68 -0.378 -0.191 8
0.684 -0.291 -0.593 9
0.637 -0.22 -1.125 8
0.574 -0.198 -1.013 9
0.533 -0.144 -1.365 8
0.484 -0.117 -1.568 8
0.416 -0.132 -1.659 7
0.358 -0.193 -1.645 10
0.307 -0.272 -1.615 9
0.263 -0.379 -1.547 8
0.237 -0.341 -1.392 8
0.224 -0.487 -1.264 9
0.278 -0.639 -1.158 8
0.403 -0.795 -1.151 9
0.518 -0.927 -1.246 8
0.51 -0.98 -1.448 8
0.361 -0.95 -1.791 9
0.325 -0.855 -1.612 8
0.117 -0.801 -1.975 7
-0.106 -0.753 -2.182 10
-0.327 -0.706 -2.16 8
-0.539 -0.661 -1.895 9
-0.714 -0.701 -1.505 8
-0.808 -0.826 -1.065 8
-0.727 -0.744 -0.958 9
-0.763 -0.945 -0.528 8
-0.62 -1.161 -0.145 9
-0.293 -1.195 0.136 8
-0.066 -0.995 0.131 8
-0.007 -0.783 -0.246 9
-0.006 -0.704 -0.222 6
-0.013 -0.591 -0.624 11
-0.056 -0.437 -0.782 8
-0.063 -0.237 -0.762 8
-0.042 -0.064 -0.724 9
-0.031 0.06 -0.625 8
-0.059 0.103 -0.215 9
-0.158 0.156 0.25 8
-0.142 0.141 0.225 8
-0.302 0.232 0.47 9
-0.535 0.292 0.798 8
-0.755 0.397 1.522 8
-0.761 0.514 2.528 7
-0.431 0.482 3.544 10
0.071 0.334 4.421 9
0.064 0.301 3.979 8
0.41 0.18 4.566 8
0.382 0.339 4.761 9
0.082 0.905 4.683 8
-0.157 1.623 4.475 9
-0.063 2.278 4.246 8
0.332 2.76 3.993 8
0.298 2.484 3.594 9
0.786 2.77 3.27 8
1.146 2.835 2.675 7
1.251 2.757 2.032 10
1.166 2.599 1.667 8
0.838 2.328 1.635 9
0.754 2.095 1.471 8
0.139 1.77 1.674 9
-0.581 1.524 1.973 8
-1.17 1.472 2.216 8
-1.514 1.556 2.122 9
-1.612 1.851 2.053 8
-1.698 2.305 2.201 9
-1.529 2.074 1.981 8
-1.692 2.372 2.213 7
-1.798 2.356 2.488 10
-1.826 2.092 2.671 8
-1.731 1.625 2.581 8
-1.35 0.998 2.074 9
-0.4 0.285 1.205 8
-0.36 0.257 1.084 9
1.123 -0.491 0.447 8
2.433 -1.122 0.513 8
3.071 -1.448 1.133 9
3.126 -1.435 2.017 8
2.67 -1.189 2.799 9
2.403 -1.07 2.519 6
1.795 -0.848 2.796 10
1.308 -0.825 2.414 9
0.977 -0.993 1.69 8
0.989 -1.212 0.974 9
1.496 -1.482 0.591 8
1.98 -1.844 0.41 8
1.871 -2.168 0.101 9
1.684 -1.951 0.09 8
1.068 -2.106 -0.533 9
0.263 -2.078 -1.413 8
-0.416 -2.075 -2.282 8
-0.857 -2.258 -3.069 7
-0.915 -2.393 -3.256 10
-0.581 -2.39 -2.515 9
-0.523 -2.151 -2.263 8
-0.16 -2.381 -1.234 8
-0.117 -2.568 -0.445 9
-0.339 -2.354 -0.198 8
-0.455 -1.979 -0.684 8
-0.295 -1.549 -1.777 9
-0.032 -1.14 -3.097 8
-0.029 -1.026 -2.787 9
0.145 -0.821 -3.959 8
0.233 -0.84 -4.59 7
0.309 -1.125 -4.53 10
0.28 -1.518 -3.931 8
0.211 -1.754 -3.131 9
0.238 -1.798 -2.429 8
0.214 -1.618 -2.186 8
0.204 -1.514 -1.784 9
0.138 -1.26 -1.632 8
0.145 -0.946 -1.536 9
0.206 -0.68 -1.255 8
0.257 -0.548 -0.624 8
0.374 -0.627 -0.01 9
0.337 -0.564 -0.009 6
0.564 -0.911 0.391 11
0.625 -1.242 0.704 8
0.596 -1.228 0.863 8
0.931 -0.859 1.057 9
1.493 -0.215 1.282 8
2.001 0.427 1.218 8
1.801 0.384 1.096 9
1.948 0.624 0.726 8
1.646 0.515 0.329 9
1.076 0.305 -0.124 8
0.269 -0.02 -0.688 8
-0.465 -0.27 -0.889 7
-0.898 -0.179 -0.739 10
-0.808 -0.161 -0.665 9
-0.836 0.161 -0.356 8
-0.364 0.551 0.026 8
0.308 0.871 0.201 9
0.761 1.085 0.173 8
0.79 1.244 0.166 9
0.463 1.342 0.252 8
0.417 1.207 0.227 8
-0.143 1.162 0.252 9
-0.776 0.915 0.181 8
-1.292 0.543 0.158 7
-1.601 0.168 0.231 10
-1.679 -0.063 0.306 8
-1.573 -0.185 0.317 9
-1.415 -0.166 0.285 8
-1.127 -0.206 0.302 9
-0.774 -0.193 0.348 8
-0.568 -0.181 0.408 8
-0.608 -0.183 0.58 9
-0.805 -0.176 0.769 8
-0.965 -0.152 0.748 8
-0.869 -0.136 0.674 9
-0.965 -0.096 0.426 7
-1.026 0.014 0.121 10
-1.087 0.119 -0.105 8
-1.121 0.157 -0.22 8
-1.022 0.239 -0.271 9
-0.92 0.215 -0.243 8
-0.651 0.347 -0.27 9
-0.328 0.401 -0.244 8
-0.103 0.335 -0.11 8
-0.016 0.207 0.143 9
-0.02 0.064 0.412 8
-0.097 -0.052 0.549 9
-0.088 -0.047 0.494 6
-0.244 -0.083 0.426 10
-0.376 -0.058 0.164 9
-0.425 -0.001 -0.099 8
-0.401 0.017 -0.264 9
-0.313 -0.035 -0.329 8
-0.212 -0.118 -0.311 8
-0.191 -0.107 -0.28 9
-0.19 -0.181 -0.247 8
-0.266 -0.229 -0.213 8
-0.352 -0.242 -0.189 9
-0.412 -0.214 -0.213 8
-0.387 -0.185 -0.337 7
-0.305 -0.159 -0.497 10
-0.274 -0.143 -0.448 8
-0.193 -0.134 -0.494 9
-0.127 -0.16 -0.356 8
-0.106 -0.224 -0.154 9
-0.076 -0.373 -0.045 8
-0.02 -0.45 -0.073 8
0.042 -0.313 -0.131 9
0.037 -0.282 -0.118 8
0.124 -0.132 -0.158 9
0.191 -0.117 -0.289 8
0.138 -0.14 -0.227 7
-0.039 -0.094 0.026 10
-0.17 -0.042 0.127 8
-0.21 0.004 0.051 9
-0.189 0.004 0.046 8
-0.125 0.052 -0.211 8
0.058 0.106 -0.483 9
0.296 0.162 -0.67 8
0.477 0.166 -0.69 9
0.473 0.14 -0.405 8
0.306 0.099 -0.02 8
0.275 0.089 -0.018 9
-0.007 0.034 0.23 6
-0.34 -0.011 0.356 10
-0.598 -0.064 0.406 9
-0.74 -0.151 0.391 8
-0.744 -0.247 0.335 9
-0.618 -0.328 0.28 8
-0.556 -0.295 0.252 8
-0.337 -0.354 0.216 9
-0.123 -0.363 0.156 8
-0.037 -0.355 0.087 9
-0.086 -0.345 0.054 8
-0.202 -0.319 0.063 8
-0.181 -0.287 0.057 7
-0.326 -0.273 0.08 10
-0.476 -0.267 0.093 9
-0.569 -0.241 0.096 8
-0.526 -0.209 0.096 8
-0.291 -0.195 0.096 9
0.028 -0.164 0.087 8
0.303 -0.126 0.068 9
0.273 -0.113 0.061 8
0.465 -0.08 0.032 8
0.509 -0.028 -0.024 9
0.399 0.035 -0.126 8
0.243 0.099 -0.216 7
0.101 0.173 -0.232 10
-0.006 0.222 -0.228 8
-0.006 0.2 -0.205 9
-0.065 0.213 -0.217 8
-0.084 0.23 -0.202 8
0.005 0.248 -0.184 9
0.262 0.259 -0.228 8
0.527 0.259 -0.244 9
0.475 0.233 -0.219 8
0.585 0.221 -0.185 8
0.567 0.176 -0.123 9
0.435 0.1 -0.028 7
0.201 0.006 0.065 10
-0.058 -0.101 0.149 8
-0.287 -0.141 0.192 8
-0.258 -0.127 0.173 9
-0.388 -0.111 0.197 8
-0.346 -0.075 0.174 9
-0.127 0.006 0.053 8
0.161 0.088 -0.065 8
0.36 0.111 -0.012 9
0.444 0.071 0.14 8
0.399 0.063 0.126 9
0.342 -0.001 0.162 6
0.129 -0.116 0.066 10
-0.17 -0.211 0.041 9
-0.491 -0.21 0.098 8
-0.742 -0.177 0.13 8
-0.768 -0.189 0.19 9
-0.691 -0.17 0.171 8
-0.586 -0.099 0.19 9
-0.436 -0.027 0.157 8
-0.234 -0.069 0.148 8
-0.027 -0.043 0.117 9
0.158 0.046 0.06 8
0.142 0.041 0.054 7
0.239 0.142 -0.049 10
0.201 0.213 -0.217 8
0.025 0.226 -0.386 9
-0.194 0.222 -0.422 8
-0.369 0.214 -0.329 9
-0.459 0.191 -0.211 8
-0.372 0.142 -0.073 8
-0.335 0.128 -0.066 9
-0.155 0.118 -0.029 8
0.05 0.093 0.0 9
0.225 0.06 0.116 8
0.265 0.09 0.178 7
0.232 0.087 0.212 10
0.212 0.087 0.313 8
0.191 0.078 0.282 9
0.151 0.084 0.273 8
0.058 0.032 0.134 8
-0.036 0.033 0.074 9
-0.119 0.089 0.042 8
-0.172 0.102 0.017 8
-0.203 0.096 0.003 9
-0.183 0.087 0.003 8
-0.167 0.074 0.003 9
-0.134 0.071 -0.023 6
-0.119 0.075 -0.069 10
-0.112 0.082 -0.114 9
-0.105 0.089 -0.2 8
-0.1 0.104 -0.277 9
-0.09 0.094 -0.249 8
-0.127 0.119 -0.236 8
-0.221 0.109 -0.141 9
-0.312 0.07 -0.01 8
-0.368 0.041 0.086 9
-0.372 0.017 0.113 8
-0.335 0.015 0.102 8
-0.258 0.004 0.107 7
-0.113 0.0 0.11 10
0.041 -0.007 0.112 9
0.121 -0.003 0.113 8
0.075 -0.015 0.126 8
-0.202 0.048 0.199 9
-0.181 0.043 0.179 8
-0.518 0.109 0.284 9
-0.667 0.145 0.19 8
-0.563 0.183 -0.077 8
-0.239 0.194 -0.274 9
0.061 0.216 -0.369 8
0.054 0.194 -0.332 7
0.226 0.172 -0.372 10
0.271 0.147 -0.318 8
0.214 0.131 -0.192 9
0.11 0.098 -0.07 8
0.011 0.029 0.021 8
-0.096 -0.037 0.072 9
-0.209 -0.053 0.07 8
-0.188 -0.048 0.063 9
-0.233 -0.041 0.028 8
-0.206 -0.031 -0.011 8
-0.166 0.0 -0.071 9
-0.117 0.017 -0.151 6
-0.086 0.004 -0.203 11
-0.048 -0.021 -0.178 8
-0.043 -0.018 -0.16 8
0.049 -0.052 -0.086 9
# end
#Thu Feb 26 20:28:49 GMT+08:00 2015-
