# Supplementary material for: Abnormal Gait Behavior Detection for Elderly Based on Enhanced Wigner-Ville Analysis and Cloud Incremental SVM Learning
Source: Hindawi journal article supplement (doi:10.1155/2016/5869238), 2016-01-01
Supplement: f1 [file 5869238.f1.zip › Supplementary Materials/Original Data/Forward fall Ending on the knees/original__60.txt]

# Accelerometer Values
# filename:  original__60.txt
# Saving start time: Thu Feb 26 20:28:52 GMT+08:00 2015

# sensor resolution: 0.0095825195m/s^2
#Sensorvendor: KIONIX, name: KX023 Accelerometer, type: 1,version : 1, range 39.240005

# X value, Y value, Z value, time diff in ms
0.151 -0.043 0.381 8
0.382 -0.008 0.242 9
0.344 -0.007 0.217 8
0.525 -0.006 0.065 8
0.576 -0.056 -0.074 9
0.483 -0.125 -0.167 7
0.271 -0.162 -0.247 10
0.025 -0.148 -0.319 8
-0.135 -0.083 -0.353 8
-0.122 -0.074 -0.318 9
-0.176 0.001 -0.287 8
-0.138 0.061 -0.205 9
-0.016 0.086 -0.061 8
0.096 0.071 0.175 8
0.148 0.047 0.399 9
0.133 0.042 0.359 8
0.165 0.033 0.466 8
0.18 0.044 0.419 7
0.167 0.062 0.255 10
0.149 0.084 0.041 9
0.125 0.118 -0.173 8
0.094 0.171 -0.366 8
0.084 0.154 -0.33 9
0.082 0.214 -0.522 8
0.127 0.264 -0.744 9
0.182 0.304 -0.934 8
0.225 0.327 -0.932 8
0.248 0.294 -0.705 9
0.231 0.2 -0.365 8
0.207 0.18 -0.329 7
0.188 0.072 -0.038 10
0.225 -0.013 0.202 8
0.289 -0.067 0.403 9
0.288 -0.083 0.524 8
0.205 -0.053 0.577 9
0.09 0.011 0.575 8
0.081 0.01 0.517 8
-0.005 0.096 0.432 9
-0.032 0.161 0.261 8
-0.009 0.189 0.086 9
0.007 0.202 -0.039 8
0.0 0.196 -0.117 7
-0.012 0.183 -0.154 10
-0.011 0.165 -0.138 8
0.011 0.16 -0.14 8
0.072 0.169 -0.117 9
0.165 0.198 -0.058 8
0.261 0.212 0.056 9
0.295 0.206 0.18 8
0.255 0.192 0.266 8
0.229 0.173 0.239 9
0.173 0.153 0.274 8
0.141 0.135 0.236 9
0.122 0.127 0.135 6
0.105 0.12 0.003 10
0.098 0.119 -0.098 9
0.092 0.119 -0.151 8
0.083 0.107 -0.136 9
0.083 0.101 -0.157 8
0.097 0.079 -0.159 8
0.079 0.05 -0.154 9
0.0 0.026 -0.127 8
-0.099 0.0 -0.099 9
-0.089 -0.023 -0.098 8
-0.08 -0.021 -0.088 8
-0.174 -0.033 -0.106 7
-0.165 -0.022 -0.122 10
-0.14 0.01 -0.109 8
-0.083 0.029 -0.07 9
-0.015 0.013 -0.038 8
-0.014 0.012 -0.034 9
0.012 -0.015 -0.009 8
-0.018 -0.021 0.004 8
-0.071 -0.009 -0.003 9
-0.08 -0.005 -0.037 8
-0.048 -0.015 -0.11 9
-0.031 -0.022 -0.193 8
-0.027 -0.02 -0.173 7
-0.051 -0.006 -0.227 10
-0.083 0.006 -0.24 8
-0.074 0.0 -0.207 9
-0.035 -0.021 -0.153 8
-0.016 -0.06 -0.087 8
-0.041 -0.079 -0.014 9
-0.036 -0.071 -0.012 8
-0.075 -0.066 0.036 9
-0.093 -0.069 0.062 8
-0.09 -0.081 0.074 8
-0.065 -0.075 0.078 9
-0.021 -0.031 0.072 6
0.043 0.022 0.057 11
0.039 0.019 0.051 8
0.105 0.051 0.035 8
0.131 0.059 0.023 9
0.086 0.056 0.027 8
-0.009 0.041 0.029 8
-0.093 0.015 0.032 9
-0.137 -0.021 0.054 8
-0.124 -0.019 0.048 9
-0.134 -0.054 0.07 8
-0.12 -0.078 0.092 8
-0.099 -0.075 0.107 7
-0.067 -0.044 0.106 10
-0.01 -0.031 0.083 9
0.075 -0.036 0.041 8
0.068 -0.032 0.037 8
0.145 -0.014 0.011 9
0.168 0.032 0.015 8
0.133 0.028 0.031 9
0.05 -0.028 0.074 8
-0.054 -0.078 0.148 8
-0.048 -0.07 0.134 9
-0.114 -0.091 0.2 8
-0.122 -0.103 0.209 7
-0.102 -0.126 0.15 10
-0.076 -0.14 0.063 8
-0.031 -0.109 -0.006 9
0.021 -0.036 -0.046 8
0.019 -0.033 -0.042 8
0.05 0.026 -0.061 9
0.054 0.046 -0.07 8
0.013 0.06 -0.067 9
-0.029 0.065 -0.054 8
-0.035 0.025 -0.041 8
-0.032 -0.049 -0.038 9
-0.028 -0.044 -0.034 7
-0.022 -0.105 -0.036 10
-0.01 -0.128 -0.029 8
0.029 -0.144 -0.008 8
0.101 -0.147 0.036 9
0.177 -0.149 0.084 8
0.215 -0.148 0.136 9
0.194 -0.134 0.122 8
0.163 -0.109 0.179 8
0.09 -0.102 0.19 9
0.013 -0.125 0.14 8
-0.051 -0.148 0.062 9
-0.09 -0.143 -0.013 6
-0.093 -0.121 -0.074 10
-0.083 -0.109 -0.067 9
-0.035 -0.076 -0.1 8
0.044 -0.027 -0.097 9
0.092 0.025 -0.057 8
0.09 0.046 0.012 8
0.053 0.023 0.096 9
0.002 -0.006 0.164 8
0.002 -0.006 0.147 8
-0.029 -0.026 0.167 9
-0.036 -0.024 0.156 8
-0.022 -0.008 0.124 7
0.03 0.001 0.083 10
0.106 0.028 0.046 8
0.096 0.025 0.041 9
0.167 0.072 0.01 8
0.233 0.075 -0.019 9
0.267 0.04 -0.051 8
0.239 0.031 -0.042 8
0.166 0.047 0.001 9
0.078 0.036 0.041 8
0.07 0.033 0.037 9
-0.004 -0.006 0.061 8
-0.077 -0.041 0.061 7
-0.133 -0.048 0.038 10
-0.14 -0.043 0.0 8
-0.1 -0.044 -0.053 9
-0.03 -0.046 -0.113 8
-0.027 -0.041 -0.101 8
0.042 -0.032 -0.138 9
0.084 0.0 -0.154 8
0.089 0.038 -0.154 9
0.073 0.07 -0.144 8
0.047 0.091 -0.127 8
0.007 0.083 -0.103 9
0.006 0.075 -0.093 6
-0.043 0.04 -0.069 10
-0.089 -0.003 -0.033 9
-0.1 -0.043 -0.009 8
-0.067 -0.063 -0.02 9
-0.016 -0.021 -0.039 8
0.035 0.052 -0.063 8
0.032 0.047 -0.056 9
0.084 0.086 -0.073 8
0.123 0.082 -0.072 9
0.129 0.045 -0.048 8
0.094 -0.009 0.003 8
0.013 -0.068 0.074 7
-0.084 -0.128 0.137 10
-0.076 -0.115 0.123 9
-0.159 -0.145 0.137 8
-0.188 -0.138 0.101 8
-0.158 -0.102 0.042 9
-0.095 -0.059 -0.019 8
-0.01 -0.023 -0.082 9
0.068 0.004 -0.14 8
0.061 0.004 -0.126 8
0.106 0.019 -0.183 9
0.099 0.014 -0.227 8
0.037 -0.014 -0.241 7
-0.057 -0.058 -0.235 10
-0.144 -0.077 -0.213 8
-0.183 -0.086 -0.168 9
-0.165 -0.078 -0.151 8
-0.178 -0.1 -0.105 8
-0.185 -0.118 -0.058 9
-0.16 -0.128 -0.024 8
-0.063 -0.101 -0.026 9
0.09 -0.024 -0.062 8
0.081 -0.022 -0.056 8
0.232 0.042 -0.132 9
0.33 0.072 -0.223 7
0.347 0.069 -0.29 10
0.303 0.037 -0.32 8
0.251 -0.006 -0.302 8
0.216 -0.089 -0.276 9
0.195 -0.08 -0.249 8
0.165 -0.195 -0.246 9
0.126 -0.287 -0.27 8
0.09 -0.356 -0.347 8
0.072 -0.397 -0.482 9
0.075 -0.402 -0.617 8
0.124 -0.394 -0.699 9
0.112 -0.355 -0.629 6
0.179 -0.338 -0.751 10
0.253 -0.331 -1.008 9
0.388 -0.429 -1.22 8
0.533 -0.583 -1.216 9
0.59 -0.72 -1.112 8
0.569 -0.848 -1.043 8
0.512 -0.763 -0.939 9
0.446 -0.899 -0.913 8
0.341 -1.094 -0.888 8
0.233 -1.308 -0.905 9
0.187 -1.456 -0.959 8
0.278 -1.498 -1.052 7
0.534 -1.467 -1.171 10
0.48 -1.321 -1.054 8
0.85 -1.329 -1.114 9
1.125 -1.423 -1.132 8
1.144 -1.584 -1.25 9
0.862 -1.657 -1.376 8
0.361 -1.631 -1.377 8
-0.164 -1.705 -1.256 9
-0.148 -1.534 -1.13 8
-0.536 -1.58 -0.839 9
-0.595 -1.372 -0.38 8
-0.214 -1.106 -0.004 7
0.427 -0.934 0.061 10
0.991 -0.91 -0.07 8
1.21 -1.052 -0.18 8
1.089 -0.947 -0.162 9
0.747 -0.915 -0.032 8
-0.139 -0.887 0.283 9
-1.11 -1.102 0.505 8
-1.754 -1.22 0.588 8
-1.837 -1.072 0.589 9
-1.441 -0.575 0.463 8
-1.297 -0.517 0.417 9
-0.824 0.06 -0.069 6
-0.317 0.527 -0.783 10
0.164 1.108 -1.029 9
0.319 1.867 -0.665 8
0.036 2.315 -0.131 9
0.033 2.083 0.48 8
-0.64 1.875 0.432 8
-1.529 2.122 1.163 9
-2.231 1.978 1.817 8
-2.628 1.6 2.389 9
-2.843 1.38 2.861 8
-2.844 1.406 3.186 8
-2.559 1.265 2.867 7
-2.294 1.539 3.236 10
-1.627 2.145 3.597 9
-0.601 2.766 3.935 8
0.579 2.973 4.128 8
1.482 3.108 4.186 9
1.817 3.331 4.269 8
1.635 2.997 3.842 8
1.482 3.148 3.874 9
1.15 3.211 3.659 8
0.935 3.165 3.063 9
0.631 3.314 2.153 8
0.149 3.745 1.166 7
-0.227 4.117 0.331 10
-0.204 3.706 0.298 8
-0.407 3.724 -0.202 9
-0.738 3.343 -0.407 8
-1.378 2.751 -0.286 8
-2.07 1.865 0.183 9
-2.476 0.775 0.846 8
-2.388 -0.321 1.585 9
-2.149 -0.289 1.427 8
-1.56 -1.292 2.183 8
-0.617 -1.957 2.865 9
0.57 -2.254 3.503 6
1.952 -2.555 4.074 11
3.182 -2.872 4.109 8
3.807 -2.891 3.354 8
3.426 -2.601 3.019 9
3.424 -2.389 2.062 8
3.041 -2.099 1.252 9
2.534 -1.867 0.391 8
1.928 -1.698 -0.432 8
1.301 -1.509 -0.859 9
0.945 -1.459 -0.994 8
0.85 -1.313 -0.894 8
0.974 -1.556 -1.051 7
1.34 -1.915 -1.327 10
1.517 -2.194 -1.788 9
1.341 -2.286 -2.409 8
0.957 -2.259 -2.999 8
0.473 -2.05 -3.297 9
0.426 -1.845 -2.967 8
-0.002 -1.575 -2.982 9
-0.257 -1.505 -2.926 8
-0.369 -1.564 -3.016 8
-0.365 -1.598 -3.404 9
-0.312 -1.636 -3.966 8
-0.28 -1.473 -3.57 7
-0.207 -1.495 -4.121 10
0.063 -1.446 -4.329 8
0.527 -1.453 -4.082 9
0.877 -1.511 -3.522 8
0.822 -1.473 -2.87 9
0.368 -1.317 -2.361 8
-0.058 -1.147 -1.859 8
-0.052 -1.033 -1.673 9
-0.108 -0.938 -1.283 8
0.194 -0.906 -1.216 8
0.601 -0.792 -1.123 9
0.833 -0.494 -0.679 7
0.752 -0.192 -0.06 10
0.676 -0.172 -0.054 8
0.302 0.004 0.723 8
-0.329 0.181 1.729 9
-0.933 0.423 2.847 8
-1.062 0.762 3.988 9
-0.659 1.13 4.97 8
0.085 1.325 5.656 8
0.076 1.192 5.09 9
0.884 1.009 5.54 8
1.516 0.329 5.891 9
1.919 -0.592 6.244 6
2.076 -1.321 6.256 10
2.132 -1.647 5.665 9
2.387 -1.385 4.674 8
2.148 -1.247 4.206 9
2.359 -0.354 3.056 8
2.728 0.65 1.778 8
3.204 1.139 0.405 9
2.875 1.167 -1.104 8
1.82 0.992 -2.114 9
0.601 0.447 -2.24 8
0.541 0.402 -2.016 8
-0.536 -0.496 -1.865 7
-1.265 -1.264 -1.519 10
-1.474 -1.67 -0.961 8
-1.279 -1.732 -0.759 9
-0.936 -1.34 -1.116 8
-0.809 -0.748 -1.706 9
-0.728 -0.673 -1.535 8
-0.929 -0.437 -2.055 8
-1.35 -0.46 -2.11 9
-1.854 -0.467 -1.77 8
-2.127 -0.585 -1.463 9
-2.054 -0.702 -1.178 8
-1.849 -0.632 -1.06 7
-1.598 -0.632 -0.815 10
-1.158 -0.627 -0.725 8
-0.602 -0.579 -0.716 9
-0.149 -0.402 -0.783 8
0.179 -0.163 -0.973 8
0.426 0.027 -1.129 9
0.402 0.123 -1.214 8
0.362 0.111 -1.093 9
-0.012 0.138 -1.115 8
-0.585 0.144 -0.875 8
-1.133 0.136 -0.473 9
-1.475 0.076 -0.198 6
-1.496 -0.009 -0.088 10
-1.346 -0.008 -0.079 9
-1.075 -0.009 -0.071 8
-0.719 0.071 -0.161 9
-0.334 0.173 -0.312 8
-0.02 0.304 -0.419 8
0.068 0.344 -0.352 9
-0.052 0.317 -0.125 8
-0.047 0.285 -0.112 9
-0.232 0.265 0.062 8
-0.338 0.201 0.144 8
-0.385 0.12 0.159 7
-0.428 0.035 0.045 10
-0.463 0.01 -0.188 9
-0.443 0.121 -0.399 8
-0.399 0.109 -0.359 8
-0.335 0.3 -0.507 9
-0.274 0.455 -0.584 8
-0.297 0.523 -0.575 9
-0.395 0.509 -0.456 8
-0.541 0.42 -0.235 8
-0.714 0.304 -0.05 9
-0.643 0.273 -0.045 8
-0.764 0.201 0.016 7
-0.74 0.16 0.0 10
-0.526 0.125 -0.042 8
-0.159 0.127 -0.029 9
0.212 0.108 0.097 8
0.417 0.007 0.249 8
0.375 0.006 0.224 9
0.359 -0.066 0.32 8
0.238 -0.119 0.356 9
0.129 -0.172 0.35 8
0.077 -0.151 0.328 8
0.093 -0.04 0.292 9
0.084 -0.036 0.263 7
0.128 0.107 0.173 10
0.145 0.222 0.007 8
0.119 0.29 -0.171 8
0.054 0.307 -0.318 9
-0.012 0.275 -0.433 8
-0.024 0.187 -0.461 9
-0.049 0.09 -0.341 8
-0.044 0.081 -0.307 8
-0.117 0.013 -0.096 9
-0.081 -0.163 0.03 8
-0.045 -0.294 0.1 9
-0.025 -0.281 0.201 6
0.051 -0.193 0.193 10
0.084 -0.044 0.101 9
0.075 -0.039 0.091 8
0.068 0.047 0.1 9
0.013 0.045 0.189 8
-0.114 0.11 0.255 8
-0.2 0.046 0.266 9
-0.121 -0.185 0.227 8
-0.109 -0.167 0.204 8
0.006 -0.246 0.154 9
0.068 -0.119 0.048 8
0.095 0.054 -0.134 7
0.087 0.139 -0.249 10
0.032 0.236 -0.287 8
0.034 0.155 -0.188 9
0.031 0.14 -0.169 8
0.042 0.133 0.048 9
0.045 0.29 0.123 8
0.078 0.333 0.035 8
-0.03 0.311 -0.106 9
-0.293 0.212 -0.216 8
-0.516 0.066 -0.185 9
-0.464 0.06 -0.166 8
-0.525 -0.095 -0.012 7
-0.455 -0.233 0.151 10
-0.34 -0.32 0.249 8
-0.259 -0.339 0.268 9
-0.253 -0.344 0.252 8
-0.272 -0.354 0.23 8
-0.245 -0.318 0.207 9
-0.216 -0.316 0.203 8
-0.136 -0.28 0.204 9
-0.044 -0.243 0.194 8
-0.013 -0.218 0.182 8
-0.07 -0.2 0.148 9
-0.063 -0.18 0.133 6
-0.159 -0.17 0.018 10
-0.236 -0.119 -0.173 9
-0.278 -0.029 -0.397 8
-0.252 0.071 -0.564 9
-0.175 0.13 -0.607 8
-0.119 0.115 -0.563 8
-0.103 0.063 -0.398 9
-0.092 0.057 -0.358 8
-0.11 -0.012 -0.093 9
-0.128 -0.092 0.139 8
-0.083 -0.144 0.276 8
0.069 -0.165 0.329 7
0.294 -0.184 0.335 10
0.386 -0.193 0.297 9
0.347 -0.173 0.268 8
0.161 -0.178 0.198 8
-0.153 -0.183 0.174 9
-0.459 -0.187 0.186 8
-0.702 -0.17 0.172 9
-0.786 -0.132 0.127 8
-0.645 -0.125 -0.043 8
-0.581 -0.112 -0.039 9
-0.447 -0.092 -0.245 8
-0.426 -0.058 -0.21 7
-0.443 -0.056 -0.061 10
-0.464 -0.077 0.048 8
-0.404 -0.134 0.126 9
-0.363 -0.12 0.113 8
-0.231 -0.168 0.11 8
-0.102 -0.135 0.106 9
-0.107 -0.057 0.112 8
-0.205 0.0 0.043 9
-0.322 0.037 -0.064 8
-0.412 0.063 -0.107 8
-0.371 0.057 -0.096 9
-0.469 0.063 -0.141 7
-0.54 0.042 -0.101 10
-0.454 0.008 0.048 8
-0.189 -0.015 0.128 8
0.178 -0.018 0.161 9
0.54 -0.01 0.16 8
0.486 -0.009 0.144 9
0.693 0.002 0.095 8
0.587 0.01 0.017 8
0.189 0.013 0.026 9
-0.269 0.014 0.134 8
-0.537 0.002 0.199 8
-0.483 0.002 0.179 7
-0.543 -0.06 0.16 10
-0.414 -0.118 0.105 9
-0.149 -0.111 0.079 8
0.144 -0.088 0.082 8
0.339 -0.063 0.109 9
0.386 -0.011 0.118 8
0.328 0.031 0.062 9
0.295 0.028 0.056 8
0.124 0.053 0.013 8
-0.133 0.216 -0.08 9
-0.192 0.306 -0.328 8
-0.069 0.296 -0.568 7
0.01 0.368 -0.639 10
0.054 0.395 -0.559 8
0.049 0.356 -0.503 9
0.095 0.337 -0.334 8
0.187 0.251 -0.1 9
0.262 0.092 0.101 8
0.188 -0.048 0.214 8
-0.103 -0.114 0.262 9
-0.409 -0.154 0.264 8
-0.368 -0.139 0.237 8
-0.506 -0.18 0.226 9
-0.481 -0.251 0.206 7
-0.377 -0.346 0.18 10
# end
#Thu Feb 26 20:28:56 GMT+08:00 2015-
