# Supplementary material for: Abnormal Gait Behavior Detection for Elderly Based on Enhanced Wigner-Ville Analysis and Cloud Incremental SVM Learning
Source: Hindawi journal article supplement (doi:10.1155/2016/5869238), 2016-01-01
Supplement: f1 [file 5869238.f1.zip › Supplementary Materials/Original Data/Forward fall With recovery/original__72.txt]

# Accelerometer Values
# filename:  original__72.txt
# Saving start time: Thu Feb 26 20:31:01 GMT+08:00 2015

# sensor resolution: 0.0095825195m/s^2
#Sensorvendor: KIONIX, name: KX023 Accelerometer, type: 1,version : 1, range 39.240005

# X value, Y value, Z value, time diff in ms
-0.193 0.009 -0.245 8
-0.37 0.002 -0.218 9
-0.496 0.013 -0.205 8
-0.53 0.007 -0.223 8
-0.477 0.006 -0.231 9
-0.439 -0.018 -0.208 8
-0.297 -0.066 -0.189 9
-0.126 -0.129 -0.135 8
-0.074 -0.172 -0.063 7
-0.158 -0.195 -0.01 10
-0.27 -0.198 0.0 8
-0.243 -0.179 0.0 9
-0.336 -0.165 -0.036 8
-0.455 -0.142 -0.082 8
-0.54 -0.119 -0.128 9
-0.497 -0.076 -0.203 8
-0.383 0.028 -0.306 9
-0.269 0.181 -0.445 8
-0.242 0.163 -0.401 8
-0.158 0.292 -0.613 9
-0.114 0.386 -0.778 6
-0.106 0.453 -0.822 11
-0.194 0.459 -0.795 8
-0.4 0.398 -0.734 8
-0.633 0.333 -0.67 9
-0.57 0.3 -0.603 8
-0.725 0.288 -0.548 8
-0.764 0.33 -0.48 9
-0.334 0.053 -0.48 8
0.31 -0.416 -0.62 9
0.459 -0.326 -0.722 8
0.166 0.301 -0.576 8
0.15 0.27 -0.519 7
-0.268 0.841 -0.322 10
-0.401 0.836 -0.304 9
-0.217 0.4 -0.388 8
-0.024 -0.021 -0.436 8
0.053 -0.26 -0.438 9
0.048 -0.385 -0.402 8
0.043 -0.346 -0.361 9
0.067 -0.445 -0.307 8
0.132 -0.489 -0.255 8
0.233 -0.551 -0.225 9
0.379 -0.66 -0.246 8
0.341 -0.594 -0.222 7
0.656 -0.773 -0.402 10
0.59 -0.696 -0.362 8
0.594 -0.57 -0.525 9
0.598 -0.468 -0.622 8
0.612 -0.433 -0.637 9
0.567 -0.404 -0.592 8
0.476 -0.45 -0.489 8
0.428 -0.405 -0.44 9
0.343 -0.554 -0.396 8
0.252 -0.667 -0.231 8
0.135 -0.709 -0.218 9
0.026 -0.709 -0.253 7
0.048 -0.649 -0.285 10
0.205 -0.547 -0.293 8
0.184 -0.493 -0.263 8
0.453 -0.457 -0.189 9
0.798 -0.496 0.055 8
1.052 -0.576 0.31 9
1.092 -0.76 0.472 8
0.849 -0.983 0.568 8
0.401 -1.093 0.547 9
0.361 -0.984 0.493 8
-0.059 -1.005 0.3 9
-0.293 -0.995 -0.046 6
-0.223 -1.038 -0.337 10
0.069 -1.09 -0.52 9
0.392 -0.933 -0.647 8
0.659 -0.552 -0.481 9
0.593 -0.497 -0.433 8
0.837 -0.323 0.169 8
1.028 -0.444 0.865 9
0.988 -0.499 1.317 8
0.733 -0.447 1.565 8
0.419 -0.461 1.563 9
0.142 -0.569 1.327 8
0.128 -0.512 1.194 7
0.0 -0.671 0.908 10
0.097 -0.779 0.621 8
0.335 -0.774 0.604 9
0.492 -0.805 0.859 8
0.461 -0.924 1.205 9
0.24 -0.98 1.519 8
0.216 -0.882 1.367 8
-0.178 -0.994 1.545 9
-0.599 -1.341 1.651 8
-0.929 -1.727 1.532 9
-1.118 -1.991 1.256 8
-1.006 -1.792 1.131 7
-0.379 -1.442 1.48 10
-0.341 -1.298 1.332 8
0.423 -1.001 1.739 9
1.021 -0.878 2.048 8
1.035 -0.62 2.106 8
0.641 -0.35 1.85 9
0.193 -0.167 1.277 8
0.174 -0.151 1.149 9
-0.069 0.04 0.459 8
-0.089 0.226 -0.286 8
0.033 0.279 -0.958 9
0.247 0.282 -1.227 6
0.542 0.258 -1.051 10
0.858 0.197 -0.464 9
0.772 0.177 -0.417 8
0.919 0.188 0.549 9
0.911 0.24 1.566 8
0.908 0.291 2.232 8
0.958 0.331 2.428 9
1.009 0.267 2.218 8
1.053 0.121 1.723 9
0.947 0.109 1.551 8
0.945 -0.042 1.067 8
0.814 -0.105 0.846 7
0.616 0.019 1.166 10
0.371 0.186 1.996 9
0.14 0.267 2.917 8
0.054 0.312 3.69 8
0.049 0.281 3.321 9
0.032 0.317 3.819 8
0.049 0.372 3.84 9
0.173 0.358 3.411 8
0.291 0.259 2.845 8
0.232 0.183 2.435 9
-0.037 0.064 2.138 8
-0.033 0.057 1.924 7
-0.334 -0.182 1.715 10
-0.366 -0.387 1.606 8
-0.133 -0.484 1.617 9
0.127 -0.526 1.653 8
0.413 -0.54 1.512 8
0.719 -0.616 1.115 9
0.647 -0.554 1.003 8
0.68 -0.606 0.569 9
0.416 -0.818 0.351 8
-0.012 -1.281 0.228 8
-0.661 -1.388 0.105 9
-0.595 -1.249 0.094 7
-1.21 -0.843 -0.371 10
-1.408 -0.759 -0.334 8
-1.172 0.055 -1.227 8
-0.793 0.494 -2.478 9
-0.471 0.849 -3.513 8
-0.354 1.126 -4.079 9
-0.5 1.314 -4.419 8
-0.45 1.183 -3.977 8
-0.604 1.08 -4.067 9
-0.562 0.713 -3.766 8
-0.406 0.164 -3.37 9
-0.246 -0.376 -3.005 6
-0.141 -0.739 -2.627 10
-0.226 -0.855 -2.223 9
-0.203 -0.769 -2.001 8
-0.421 -0.628 -1.462 8
-0.51 -0.47 -0.75 9
-0.38 -0.442 0.026 8
-0.152 -0.535 0.803 9
-0.005 -0.694 1.522 8
0.037 -0.784 2.014 8
0.033 -0.705 1.812 9
0.122 -0.708 1.894 8
0.3 -0.589 1.466 7
0.482 -0.34 0.674 10
0.569 -0.025 -0.111 8
0.517 0.243 -0.721 9
0.336 0.402 -1.106 8
0.302 0.361 -0.995 9
0.047 0.543 -1.127 8
-0.244 0.731 -1.114 8
-0.353 0.835 -1.066 9
-0.082 0.953 -1.062 8
0.375 1.154 -1.087 9
0.72 1.375 -1.053 8
0.648 1.238 -0.948 7
0.792 1.36 -0.973 10
0.788 1.33 -1.114 8
0.676 1.169 -1.254 9
0.484 0.896 -1.24 8
0.275 0.599 -1.058 8
0.151 0.314 -0.833 9
0.136 0.283 -0.75 8
0.154 0.079 -0.501 8
0.269 -0.006 -0.611 9
0.603 0.222 -0.766 8
0.766 0.66 -0.343 9
0.689 0.893 0.5 6
0.458 0.937 1.642 10
0.412 0.843 1.477 9
0.275 0.871 2.58 8
0.179 0.688 3.061 9
0.097 0.253 2.818 8
-0.225 -0.136 2.094 8
-0.733 -0.385 1.077 9
-1.188 -0.547 0.012 8
-1.069 -0.492 0.011 9
-1.396 -0.603 -0.945 8
-1.555 -0.617 -1.741 8
-1.514 -0.562 -2.259 7
-1.328 -0.514 -2.473 10
-1.104 -0.52 -2.432 9
-0.994 -0.468 -2.189 8
-0.819 -0.453 -1.88 8
-0.69 -0.35 -1.241 9
-0.504 -0.264 -0.483 8
-0.184 -0.278 0.155 8
0.139 -0.349 0.657 9
0.336 -0.423 0.988 8
0.303 -0.38 0.889 9
0.356 -0.426 0.971 8
0.292 -0.465 0.774 7
0.127 -0.499 0.444 10
-0.096 -0.514 0.193 8
-0.263 -0.499 0.151 9
-0.277 -0.433 0.313 8
-0.249 -0.389 0.281 8
-0.129 -0.331 0.568 9
0.048 -0.271 0.962 8
0.211 -0.195 1.328 9
0.295 -0.138 1.559 8
0.311 -0.048 1.797 8
0.294 0.067 1.95 9
0.264 0.06 1.755 6
0.239 0.169 1.881 11
0.299 0.17 2.125 8
0.554 0.026 2.383 8
0.881 -0.129 2.606 9
1.142 -0.168 2.788 8
1.304 -0.061 2.895 9
1.174 -0.055 2.606 8
1.21 0.082 2.726 8
1.083 0.14 2.768 9
0.827 0.195 2.612 8
0.593 0.283 2.283 8
0.495 0.322 1.866 7
0.512 0.335 1.507 10
0.461 0.301 1.356 9
0.507 0.317 1.09 8
0.45 0.305 0.897 8
0.225 0.28 0.825 9
-0.178 0.254 0.888 8
-0.547 0.221 1.012 9
-0.658 0.192 1.006 8
-0.592 0.173 0.905 8
-0.478 0.171 0.671 9
-0.297 0.254 0.233 8
-0.232 0.422 -0.371 7
-0.351 0.563 -1.039 10
-0.684 0.634 -1.675 8
-1.117 0.637 -2.073 9
-1.005 0.574 -1.865 8
-1.325 0.466 -1.964 9
-1.378 0.247 -1.86 8
-1.197 0.031 -1.694 8
-0.929 -0.096 -1.575 9
-0.737 -0.12 -1.543 8
-0.699 -0.045 -1.711 8
-0.629 -0.041 -1.54 9
-0.815 0.15 -1.67 7
-1.15 0.34 -1.592 10
-1.393 0.391 -1.415 8
-1.407 0.381 -1.19 8
-1.181 0.301 -1.149 9
-0.773 0.228 -1.264 8
-0.696 0.206 -1.137 9
-0.29 0.215 -1.387 8
-0.03 0.181 -1.817 8
0.038 0.147 -2.23 9
-0.09 0.166 -2.451 8
-0.256 0.124 -2.451 9
-0.23 0.111 -2.206 6
-0.308 0.047 -2.036 10
-0.315 -0.03 -1.767 9
-0.268 -0.077 -1.435 8
-0.173 0.002 -1.161 9
-0.058 0.103 -1.135 8
0.009 0.196 -1.415 8
0.008 0.176 -1.273 9
0.008 0.275 -1.675 8
0.006 0.261 -1.921 9
0.055 0.043 -1.981 8
0.095 -0.234 -1.824 8
0.012 -0.392 -1.591 7
-0.252 -0.438 -1.507 10
-0.227 -0.394 -1.356 8
-0.45 -0.373 -1.211 9
-0.531 -0.231 -0.963 8
-0.574 -0.034 -0.857 9
-0.564 0.054 -0.821 8
-0.533 -0.007 -0.81 8
-0.442 -0.138 -0.746 9
-0.398 -0.124 -0.671 8
-0.131 -0.275 -0.529 9
0.238 -0.537 -0.399 8
0.445 -0.741 -0.418 7
0.369 -0.664 -0.629 10
0.117 -0.434 -0.883 8
-0.142 -0.223 -1.041 9
-0.128 -0.2 -0.937 8
-0.303 -0.077 -1.07 8
-0.4 -0.03 -1.006 9
-0.485 -0.038 -0.515 8
-0.499 -0.151 -0.006 9
-0.431 -0.269 0.186 8
-0.343 -0.367 0.203 8
-0.309 -0.33 0.183 9
-0.23 -0.465 0.088 6
-0.202 -0.433 -0.141 11
-0.255 -0.236 -0.412 8
-0.392 -0.054 -0.613 8
-0.407 0.062 -0.677 9
-0.261 0.13 -0.37 8
-0.235 0.117 -0.333 8
-0.115 0.119 0.073 9
-0.006 0.02 0.161 8
0.064 -0.116 0.141 9
0.03 -0.102 0.067 8
-0.079 0.037 -0.161 8
-0.071 0.033 -0.145 7
-0.282 0.257 -0.415 10
-0.391 0.571 -0.669 9
-0.124 0.816 -0.807 8
0.42 1.02 -0.724 8
0.912 1.324 -0.54 9
1.114 1.503 -0.42 8
1.069 1.471 -0.341 9
0.962 1.324 -0.307 8
0.784 1.254 -0.23 8
0.483 1.109 -0.193 9
0.085 0.98 -0.181 8
-0.227 0.981 -0.235 7
-0.305 1.108 -0.253 10
-0.274 0.997 -0.227 8
-0.099 1.184 -0.152 9
0.253 1.237 -0.189 8
0.593 1.19 -0.245 8
0.687 1.197 -0.133 9
0.459 1.176 -0.004 8
0.06 1.068 0.148 9
0.054 0.961 0.133 8
-0.312 0.837 0.337 8
-0.452 0.758 0.321 9
-0.188 0.77 0.302 7
0.314 0.867 0.427 10
0.811 0.955 0.339 8
1.285 0.922 0.37 8
1.156 0.83 0.333 9
1.351 0.77 0.578 8
1.194 0.756 0.668 9
0.879 0.72 0.72 8
0.488 0.705 0.768 8
0.177 0.722 0.722 9
0.008 0.738 0.615 8
0.007 0.664 0.553 9
-0.029 0.71 0.479 6
0.09 0.762 0.446 10
0.305 0.765 0.384 9
0.473 0.749 0.293 8
0.528 0.753 0.236 8
0.508 0.755 0.18 9
0.457 0.679 0.162 8
0.404 0.679 -0.038 9
0.355 0.658 -0.432 8
0.286 0.631 -0.882 8
0.126 0.732 -1.157 9
-0.056 0.849 -1.145 8
-0.05 0.764 -1.03 7
-0.143 0.667 -0.928 10
-0.087 0.446 -0.887 8
0.068 0.271 -0.838 9
0.163 0.135 -0.77 8
0.153 0.036 -0.719 9
0.051 -0.005 -0.654 8
-0.097 -0.014 -0.549 8
-0.087 -0.013 -0.494 9
-0.17 0.008 -0.28 8
-0.166 0.03 0.054 9
-0.133 0.019 0.367 8
-0.136 -0.045 0.61 7
-0.226 -0.14 0.812 10
-0.346 -0.212 0.932 8
-0.312 -0.191 0.839 9
-0.386 -0.237 0.857 8
-0.422 -0.259 0.772 8
-0.436 -0.249 0.646 9
-0.398 -0.21 0.542 8
-0.24 -0.157 0.468 9
-0.216 -0.07 0.356 8
-0.194 -0.063 0.32 8
0.405 0.064 0.093 9
0.564 0.169 -0.189 6
0.489 0.223 -0.338 10
0.218 0.221 -0.252 9
-0.1 0.139 -0.137 8
-0.09 0.125 -0.123 9
-0.375 -0.056 -0.028 8
-0.623 -0.27 0.122 8
-0.851 -0.461 0.244 9
-0.993 -0.578 0.379 8
-0.986 -0.569 0.478 9
-0.806 -0.428 0.472 8
-0.725 -0.385 0.425 8
-0.408 -0.098 0.366 7
-0.117 0.256 0.232 10
0.031 0.582 0.028 9
0.039 0.801 -0.145 8
-0.05 0.858 -0.208 8
-0.209 0.781 -0.275 9
-0.188 0.703 -0.248 8
-0.387 0.515 -0.292 9
-0.542 0.309 -0.155 8
-0.614 0.174 0.033 8
-0.614 0.079 0.213 9
-0.563 0.018 0.356 8
-0.507 0.016 0.321 7
-0.442 -0.006 0.383 10
-0.333 -0.01 0.374 8
-0.138 0.015 0.308 9
0.041 0.042 0.199 8
0.088 0.015 0.067 8
-0.017 -0.06 -0.003 9
-0.203 -0.207 0.053 8
-0.183 -0.186 0.048 9
-0.437 -0.405 0.182 8
-0.717 -0.605 0.32 8
-0.858 -0.705 0.479 9
-0.863 -0.691 0.657 7
-0.764 -0.575 0.8 10
-0.535 -0.422 0.856 8
-0.482 -0.38 0.77 8
-0.233 -0.208 0.733 9
-0.074 -0.005 0.572 8
0.001 0.155 0.294 9
0.011 0.239 0.006 8
-0.006 0.258 -0.213 8
-0.015 0.241 -0.305 9
-0.014 0.216 -0.274 8
-0.002 0.135 -0.256 9
0.04 0.009 -0.202 6
0.085 -0.047 -0.11 10
0.111 -0.028 -0.003 9
0.125 0.0 0.065 8
0.112 0.0 0.058 8
0.117 0.027 0.069 9
0.109 0.067 0.067 8
0.095 0.056 0.029 9
-0.015 0.061 -0.002 8
-0.225 0.131 -0.014 8
-0.398 0.175 -0.123 9
-0.358 0.158 -0.111 8
-0.445 0.183 -0.303 7
-0.386 0.209 -0.57 10
-0.145 0.307 -0.875 8
0.113 0.45 -1.158 9
0.236 0.502 -1.284 8
0.218 0.452 -1.144 9
0.196 0.406 -1.029 8
0.011 0.319 -0.76 8
-0.229 0.209 -0.421 9
-0.353 0.085 -0.101 8
-0.337 -0.014 0.111 8
-0.222 -0.075 0.285 9
-0.199 -0.067 0.256 7
-0.025 -0.107 0.408 10
0.21 -0.129 0.476 8
0.468 -0.132 0.471 8
0.633 -0.128 0.452 9
0.683 -0.146 0.406 8
0.663 -0.163 0.285 9
0.534 -0.135 0.109 8
0.481 -0.121 0.098 8
0.298 -0.074 -0.06 9
0.156 -0.036 -0.161 8
0.103 -0.02 -0.153 9
0.171 -0.03 -0.005 6
0.299 -0.059 0.204 10
0.414 -0.143 0.389 9
0.372 -0.129 0.35 8
0.456 -0.226 0.466 9
0.519 -0.248 0.475 8
0.582 -0.21 0.376 8
0.598 -0.119 0.268 9
0.54 -0.007 0.216 8
0.428 0.037 0.184 9
0.386 0.033 0.166 8
0.267 -0.005 0.158 8
0.184 -0.078 0.173 7
0.177 -0.131 0.18 10
0.254 -0.145 0.178 9
0.353 -0.138 0.135 8
0.414 -0.114 0.045 8
0.372 -0.103 0.04 9
0.372 -0.058 -0.052 8
0.296 0.024 -0.129 8
0.191 0.115 -0.206 9
0.114 0.152 -0.297 8
0.074 0.15 -0.332 9
0.066 0.135 -0.271 8
0.036 0.102 -0.244 7
0.0 0.007 -0.129 10
-0.044 -0.115 0.037 8
-0.07 -0.232 0.24 9
-0.051 -0.358 0.39 8
-0.022 -0.46 0.452 8
-0.02 -0.414 0.406 9
0.018 -0.459 0.417 8
0.076 -0.435 0.373 9
0.127 -0.367 0.29 8
0.211 -0.355 0.176 8
0.283 -0.312 0.078 9
0.254 -0.281 0.07 6
0.194 -0.031 0.097 11
0.089 0.104 0.166 8
0.0 0.005 0.121 8
-0.13 -0.07 -0.015 9
-0.225 -0.099 -0.126 8
-0.176 -0.158 -0.149 8
-0.05 -0.207 -0.098 9
-0.045 -0.186 -0.088 8
0.044 -0.084 0.0 9
0.102 0.028 0.061 8
0.132 0.031 0.089 8
0.094 0.054 0.144 7
0.0 0.084 0.185 10
-0.071 0.07 0.129 9
-0.064 0.063 0.116 8
-0.091 0.072 -0.055 8
-0.144 0.139 -0.24 9
-0.23 0.198 -0.309 8
-0.252 0.177 -0.274 9
-0.293 0.216 -0.213 8
-0.333 0.209 0.008 8
-0.3 0.188 0.007 9
-0.264 0.038 0.352 8
-0.218 -0.06 0.596 7
-0.172 -0.13 0.704 10
-0.172 -0.208 0.674 8
-0.249 -0.274 0.523 9
-0.383 -0.334 0.308 8
-0.345 -0.301 0.277 8
-0.503 -0.257 0.194 9
-0.585 -0.124 0.075 8
-0.52 -0.049 -0.171 9
-0.329 0.044 -0.358 8
-0.071 0.174 -0.545 8
0.139 0.27 -0.645 9
0.125 0.243 -0.58 7
0.221 0.322 -0.528 10
0.264 0.37 -0.407 8
0.274 0.38 -0.276 8
0.162 0.357 -0.078 9
-0.08 0.198 0.249 8
-0.31 -0.058 0.573 9
-0.279 -0.052 0.516 8
-0.45 -0.232 0.675 8
-0.514 -0.288 0.679 9
-0.437 -0.253 0.56 8
-0.298 -0.175 0.363 9
# end
#Thu Feb 26 20:31:05 GMT+08:00 2015.
