# Supplementary material for: Abnormal Gait Behavior Detection for Elderly Based on Enhanced Wigner-Ville Analysis and Cloud Incremental SVM Learning
Source: Hindawi journal article supplement (doi:10.1155/2016/5869238), 2016-01-01
Supplement: f1 [file 5869238.f1.zip › Supplementary Materials/Original Data/Forward fall With recovery/original__73.txt]

# Accelerometer Values
# filename:  original__73.txt
# Saving start time: Thu Feb 26 20:31:07 GMT+08:00 2015

# sensor resolution: 0.0095825195m/s^2
#Sensorvendor: KIONIX, name: KX023 Accelerometer, type: 1,version : 1, range 39.240005

# X value, Y value, Z value, time diff in ms
-0.162 -0.16 -0.188 9
-0.113 -0.123 -0.485 8
-0.071 -0.102 -0.773 8
-0.077 -0.094 -0.934 9
-0.069 -0.085 -0.841 6
-0.104 -0.088 -0.911 11
-0.137 -0.079 -0.82 8
-0.155 -0.189 -0.643 8
-0.148 -0.289 -0.33 9
-0.117 -0.373 0.022 8
0.0 -0.425 0.295 8
0.27 -0.431 0.42 9
0.243 -0.388 0.378 8
0.543 -0.365 0.388 9
0.713 -0.289 0.311 8
0.716 -0.063 0.182 8
0.638 0.391 0.139 7
0.563 0.848 0.064 10
0.525 0.811 -0.367 9
0.473 0.73 -0.331 8
0.55 0.192 -0.868 8
0.704 -0.384 -0.99 9
0.828 -0.737 -0.609 8
0.933 -0.789 0.05 9
0.961 -0.645 0.634 8
0.841 -0.591 0.921 8
0.757 -0.531 0.829 9
0.668 -0.647 0.834 8
0.525 -0.707 0.677 7
0.246 -0.641 0.487 10
0.039 -0.503 0.287 8
0.06 -0.284 0.125 9
0.194 -0.118 -0.019 8
0.175 -0.106 -0.017 9
0.334 -0.064 -0.15 8
0.494 -0.087 -0.204 8
0.5 -0.197 -0.108 9
0.284 -0.415 0.06 8
-0.04 -0.605 0.063 8
-0.27 -0.634 -0.229 9
-0.243 -0.57 -0.206 7
-0.288 -0.493 -0.587 10
-0.215 -0.39 -0.84 8
-0.153 -0.389 -0.913 8
-0.173 -0.534 -0.808 9
-0.283 -0.74 -0.451 8
-0.465 -0.888 0.018 9
-0.418 -0.799 0.017 8
-0.663 -0.787 0.322 8
-0.692 -0.537 0.645 9
-0.538 -0.316 0.881 8
-0.428 -0.365 0.922 9
-0.385 -0.329 1.001 6
0.216 -0.382 0.97 10
0.194 -0.344 0.873 9
0.556 -0.438 0.831 8
0.734 -0.439 0.94 9
0.693 -0.294 0.971 8
0.575 -0.104 0.784 8
0.476 0.04 0.373 9
0.467 0.153 -0.035 8
0.42 0.137 -0.032 8
0.461 0.258 -0.309 9
0.365 0.442 -0.673 8
0.235 0.669 -0.982 7
0.247 0.831 -1.086 10
0.346 0.982 -1.147 8
0.311 0.884 -1.032 9
0.468 1.076 -1.119 8
0.676 1.233 -1.23 9
0.852 1.208 -1.188 8
0.914 0.875 -0.888 8
0.894 0.509 -0.261 9
0.589 0.297 0.535 8
0.53 0.267 0.481 9
-0.108 -0.363 0.993 8
-0.545 -1.349 1.257 7
-0.665 -1.603 1.072 10
-0.739 -1.187 0.381 8
-0.733 -0.794 -0.326 9
-0.61 -0.591 -0.895 8
-0.549 -0.532 -0.805 8
-0.412 -0.507 -1.158 9
-0.127 -0.837 -1.109 8
0.128 -1.315 -0.612 9
0.073 -1.587 0.125 8
-0.143 -1.736 0.821 8
-0.396 -1.712 1.107 9
-0.356 -1.541 0.997 6
-0.741 -1.289 0.582 10
-0.998 -0.917 -0.31 9
-0.734 -0.65 -1.347 8
-0.03 -0.448 -2.395 9
0.813 -0.282 -3.133 8
1.439 -0.181 -3.407 8
1.295 -0.163 -3.066 9
1.536 -0.108 -2.947 8
1.447 -0.107 -2.345 9
1.159 -0.288 -1.442 8
0.766 -0.625 -0.667 8
0.444 -0.923 -0.23 7
0.322 -1.121 -0.077 10
0.289 -1.009 -0.069 9
0.445 -1.099 -0.12 8
0.971 -1.076 -0.253 8
1.747 -1.008 -0.275 9
2.415 -0.984 -0.09 8
2.682 -0.944 0.329 9
2.483 -0.754 0.791 8
2.235 -0.679 0.712 8
1.79 -0.47 0.92 9
1.361 -0.306 0.749 8
1.221 -0.195 0.17 7
1.524 -0.211 -0.522 10
2.452 -0.374 -0.771 8
2.207 -0.337 -0.416 9
3.62 -0.713 -0.374 8
4.642 -1.062 0.521 8
4.774 -1.194 1.788 9
4.216 -1.086 2.79 8
3.326 -0.704 3.007 9
2.542 -0.175 2.689 8
2.287 -0.157 2.42 8
1.873 0.34 2.152 9
1.866 0.785 2.149 7
2.191 1.202 2.282 10
2.912 1.108 2.361 8
3.816 0.923 2.552 8
4.506 1.042 2.926 9
4.056 0.938 2.633 8
4.3 1.066 3.12 9
3.76 1.37 3.492 8
2.654 1.671 3.37 8
1.247 1.81 2.994 9
-0.127 1.751 2.845 8
-0.783 1.464 2.756 8
-0.705 1.317 2.48 7
-0.492 1.134 2.532 10
0.028 0.797 2.659 9
-0.422 0.515 2.071 8
-2.247 0.444 0.448 8
-4.079 0.023 -1.34 9
-4.669 -0.58 -2.503 8
-4.202 -0.522 -2.253 9
-3.313 -1.188 -2.433 8
-1.609 -1.892 -1.657 8
0.086 -2.352 -0.725 9
1.365 -2.497 -0.062 8
1.874 -2.417 0.354 7
1.41 -2.227 0.713 10
1.269 -2.004 0.642 8
0.105 -1.833 1.144 9
-1.226 -1.645 1.836 8
-2.174 -1.431 2.598 9
-2.401 -1.184 3.136 8
-1.969 -0.877 3.192 8
-1.101 -0.531 2.736 9
-0.991 -0.478 2.462 8
-0.037 -0.177 1.725 9
0.696 0.069 0.812 8
1.087 0.323 -0.109 7
0.95 0.584 -0.755 10
0.184 0.752 -1.106 8
0.166 0.841 -1.405 9
-1.034 0.757 -1.265 8
-2.219 0.774 -1.552 8
-3.128 0.733 -1.679 9
-3.725 0.668 -1.651 8
-3.964 0.547 -1.415 9
-3.873 0.34 -0.786 8
-3.485 0.306 -0.708 8
-3.104 0.049 0.132 9
-2.557 -0.171 0.951 6
-2.131 -0.298 1.533 10
-1.751 -0.317 1.577 9
-1.345 -0.349 0.985 8
-0.631 -0.255 0.156 9
-0.568 -0.229 0.14 8
0.38 -0.063 -0.566 8
1.177 -0.117 -1.122 9
1.829 -0.256 -1.452 8
2.132 -0.257 -1.744 9
2.03 -0.132 -1.977 8
1.553 -0.077 -2.04 8
1.397 -0.069 -1.836 7
0.805 -0.134 -1.832 10
0.357 -0.247 -1.662 9
-0.08 -0.617 -1.479 8
-0.427 -1.046 -1.16 8
-0.811 -1.365 -0.556 9
-1.31 -1.584 0.198 8
-1.179 -1.426 0.178 9
-1.313 -1.423 0.983 8
-0.969 -1.301 1.479 8
-0.497 -1.132 1.361 9
0.018 -0.88 0.618 8
0.539 -0.457 -0.239 7
0.681 -0.179 -1.015 10
0.613 -0.161 -0.914 8
0.292 -0.133 -1.548 9
-0.242 -0.175 -1.782 8
-0.866 -0.283 -1.708 8
-1.602 -0.409 -1.484 9
-1.949 -0.373 -1.062 8
-1.808 -0.088 -0.55 9
-1.627 -0.08 -0.495 8
-1.445 0.074 -0.281 8
-1.063 0.012 -0.274 9
-0.573 -0.044 -0.101 6
-0.311 -0.086 0.168 11
-0.368 -0.087 0.347 8
-0.599 -0.076 0.432 8
-0.539 -0.068 0.389 9
-0.741 -0.031 0.384 8
-0.828 0.084 0.247 9
-0.811 0.174 0.021 8
-0.77 0.164 -0.157 8
-0.74 0.077 -0.261 9
-0.666 0.07 -0.235 8
-0.594 -0.002 -0.055 8
-0.512 -0.049 0.385 7
-0.489 -0.143 0.805 10
-0.453 -0.338 1.203 9
-0.392 -0.538 1.504 8
-0.362 -0.572 1.402 8
-0.326 -0.515 1.262 9
-0.344 -0.343 0.868 8
-0.477 -0.103 0.433 9
-0.719 0.034 0.02 8
-0.839 0.093 -0.277 8
-0.765 0.104 -0.401 9
-0.59 0.069 -0.381 8
-0.531 0.062 -0.343 7
-0.319 0.009 -0.219 10
-0.115 -0.022 0.136 8
-0.028 -0.064 0.506 9
-0.1 -0.097 0.67 8
-0.224 -0.124 0.715 9
-0.419 -0.204 0.659 8
-0.377 -0.184 0.593 8
-0.397 -0.132 0.706 9
-0.119 0.072 0.948 8
0.089 0.174 0.832 9
0.145 0.207 0.52 8
0.108 0.246 0.265 7
-0.029 0.235 0.007 10
-0.026 0.211 0.006 8
-0.276 0.152 -0.227 8
-0.595 0.14 -0.104 9
-0.81 0.193 0.36 8
-0.766 0.271 0.762 9
-0.473 0.351 1.004 8
-0.118 0.445 1.091 8
-0.106 0.401 0.982 9
0.139 0.576 0.938 8
0.312 0.834 0.666 9
0.358 1.042 0.124 6
0.204 1.171 -0.531 10
-0.029 1.259 -1.059 9
-0.148 1.262 -1.288 8
-0.133 1.136 -1.16 9
-0.004 1.129 -1.133 8
0.302 1.252 -0.983 8
0.604 1.447 -0.909 9
0.77 1.548 -1.059 8
0.689 1.672 -1.382 9
0.749 1.552 -1.145 8
0.674 1.397 -1.031 8
0.779 0.72 -0.271 7
0.265 0.182 0.374 10
-0.529 0.064 0.928 8
-1.25 0.058 1.179 9
-1.724 0.272 0.896 8
-1.679 0.601 0.131 9
-1.511 0.541 0.118 8
-1.138 0.833 -0.737 8
-0.679 1.149 -1.31 9
-0.337 1.474 -1.5 8
-0.373 1.624 -1.244 9
-0.683 1.467 -0.627 8
-0.615 1.32 -0.564 7
-0.961 0.982 0.315 10
-1.324 0.958 1.271 8
-1.434 1.098 2.038 9
-0.995 0.814 2.432 8
-0.221 0.411 2.432 8
0.561 0.237 2.226 9
0.505 0.213 2.003 8
1.044 0.109 1.679 9
1.205 -0.004 1.3 8
1.015 -0.114 1.102 8
0.524 -0.175 1.183 9
-0.064 -0.039 1.347 6
-0.505 0.155 1.277 11
-0.454 0.139 1.149 8
-0.654 0.131 0.742 8
-0.506 0.291 0.477 9
0.037 0.695 0.427 8
0.653 0.985 0.254 8
1.055 1.025 0.058 9
1.232 0.818 -0.19 8
1.109 0.736 -0.171 9
1.078 0.516 -0.524 8
0.9 0.413 -0.88 8
0.62 0.401 -1.251 7
0.198 0.416 -1.472 10
-0.233 0.419 -1.389 9
-0.437 0.362 -1.207 8
-0.394 0.326 -1.086 8
-0.317 0.133 -0.925 9
-0.021 -0.257 -0.695 8
0.289 -0.605 -0.558 9
0.344 -0.738 -0.726 8
0.082 -0.702 -0.986 8
-0.403 -0.542 -1.244 9
-0.362 -0.488 -1.12 8
-0.856 -0.261 -1.335 7
-1.154 -0.006 -1.402 10
-1.174 0.171 -1.333 8
-0.97 0.194 -1.093 9
-0.593 0.076 -0.927 8
-0.177 -0.153 -1.104 8
-0.16 -0.137 -0.994 9
0.12 -0.368 -1.426 8
0.22 -0.482 -1.821 9
0.112 -0.464 -2.026 8
-0.165 -0.319 -2.079 8
-0.505 -0.193 -1.995 9
-0.455 -0.174 -1.795 7
-0.772 -0.16 -1.632 10
-0.9 -0.161 -1.468 8
-0.592 -0.403 -1.507 8
-0.3 -0.561 -1.862 9
-0.339 -0.172 -2.197 8
-0.43 0.386 -2.198 9
-0.387 0.348 -1.978 8
-0.576 0.79 -1.586 8
-0.908 0.951 -1.086 9
-1.101 0.635 -0.83 8
-1.064 0.182 -0.738 9
-1.004 0.065 -0.657 6
-0.93 0.169 -0.53 10
-0.837 0.152 -0.477 9
-0.732 0.274 -0.38 8
-0.578 0.322 -0.359 9
-0.349 0.219 -0.379 8
-0.097 -0.008 -0.358 8
0.028 -0.188 -0.255 9
0.013 -0.299 -0.12 8
0.012 -0.269 -0.108 8
-0.068 -0.389 -0.088 9
-0.175 -0.479 -0.148 8
-0.311 -0.515 -0.185 7
-0.424 -0.496 -0.199 10
-0.443 -0.45 -0.169 8
-0.392 -0.357 -0.066 9
-0.353 -0.321 -0.06 8
-0.252 -0.133 0.244 9
-0.066 0.045 0.624 8
0.18 0.104 0.854 8
0.381 0.078 0.897 9
0.494 0.004 0.829 8
0.517 -0.072 0.705 9
0.465 -0.065 0.634 8
0.41 -0.066 0.429 7
0.322 0.05 0.266 10
0.218 0.212 0.203 8
0.104 0.23 0.09 9
0.112 0.037 -0.155 8
0.313 0.031 -0.299 8
0.281 0.028 -0.269 9
0.602 0.385 -0.132 8
0.894 0.6 -0.018 9
0.923 0.575 -0.211 8
0.692 0.564 -0.441 8
0.375 0.531 -0.359 9
0.337 0.478 -0.323 6
0.045 0.392 -0.029 11
-0.195 0.256 0.246 8
-0.367 0.172 0.417 8
-0.438 0.201 0.46 9
-0.382 0.24 0.345 8
-0.239 0.242 0.11 8
-0.074 0.237 -0.157 9
-0.067 0.214 -0.141 8
0.071 0.218 -0.337 9
0.154 0.208 -0.374 8
0.13 0.207 -0.161 8
-0.018 0.221 0.192 7
-0.263 0.221 0.446 10
-0.237 0.199 0.402 9
-0.496 0.224 0.524 8
-0.656 0.304 0.523 8
-0.703 0.473 0.396 9
-0.697 0.684 0.143 8
-0.657 0.817 -0.194 9
-0.587 0.971 -0.338 8
-0.528 0.874 -0.304 8
-0.421 1.117 -0.151 9
-0.15 1.197 0.121 8
0.197 1.175 0.406 7
0.393 1.118 0.624 10
0.458 1.011 0.774 8
0.472 0.888 0.882 9
0.424 0.799 0.793 8
0.389 0.632 0.768 8
0.219 0.517 0.637 9
-0.066 0.518 0.557 8
-0.31 0.555 0.507 9
-0.393 0.607 0.403 8
-0.251 0.659 0.233 8
-0.226 0.593 0.209 9
0.076 0.603 -0.01 7
0.358 0.593 -0.232 10
0.526 0.593 -0.435 8
0.577 0.57 -0.625 8
0.686 0.203 -0.806 9
0.744 -0.16 -0.757 8
0.669 -0.144 -0.681 9
0.392 0.116 -0.35 8
-0.091 0.708 -0.025 8
-0.454 1.164 0.183 9
-0.31 1.102 0.249 8
0.201 0.655 0.193 9
0.181 0.589 0.173 6
0.51 0.286 0.138 10
0.568 0.146 0.136 9
0.564 0.031 0.166 8
0.511 -0.019 0.29 8
0.522 -0.026 0.377 9
0.657 -0.023 0.318 8
0.748 -0.018 0.218 9
0.673 -0.016 0.196 8
0.655 -0.015 0.161 8
0.494 -0.022 0.167 9
0.273 -0.023 0.155 8
0.168 -0.023 0.08 7
0.195 -0.029 -0.032 10
0.181 -0.044 -0.145 8
0.163 -0.039 -0.131 9
0.043 -0.056 -0.298 8
-0.119 -0.062 -0.293 9
-0.253 -0.043 -0.114 8
-0.261 -0.019 -0.095 8
-0.218 -0.006 -0.163 9
-0.196 0.0 -0.176 8
-0.212 0.0 -0.158 9
-0.262 -0.002 -0.171 8
-0.3 -0.025 -0.188 7
-0.305 -0.07 -0.198 10
-0.276 -0.109 -0.273 8
-0.236 -0.126 -0.436 8
-0.212 -0.113 -0.393 9
-0.2 -0.089 -0.556 8
-0.235 -0.064 -0.527 9
-0.298 -0.103 -0.233 8
-0.349 -0.217 0.15 8
-0.348 -0.358 0.499 9
-0.289 -0.444 0.825 8
-0.26 -0.4 0.743 9
-0.181 -0.436 0.983 6
-0.109 -0.451 1.061 10
-0.041 -0.471 0.995 9
0.02 -0.48 0.775 8
0.042 -0.449 0.483 9
0.009 -0.429 0.329 8
0.008 -0.386 0.296 8
-0.064 -0.377 0.293 9
-0.164 -0.365 0.275 8
-0.294 -0.321 0.156 9
-0.417 -0.227 -0.043 8
-0.462 -0.107 -0.231 8
-0.416 -0.097 -0.208 7
-0.31 -0.029 -0.318 10
-0.124 0.042 -0.396 9
-0.063 0.261 -0.43 8
-0.103 0.41 -0.304 8
-0.119 0.341 0.011 9
-0.122 0.193 0.355 8
-0.192 0.116 0.464 8
-0.173 0.105 0.417 9
-0.336 0.115 0.284 8
-0.502 0.179 0.046 9
-0.569 0.189 -0.174 8
-0.486 0.105 -0.363 7
-0.426 0.171 -0.511 10
-0.372 0.248 -0.498 8
-0.335 0.223 -0.448 9
-0.178 0.106 -0.346 8
-0.062 -0.003 -0.26 8
0.031 -0.074 -0.181 9
0.091 -0.033 -0.198 8
0.07 0.129 -0.305 9
-0.046 0.243 -0.418 8
-0.041 0.219 -0.376 8
-0.158 0.262 -0.331 9
-0.237 0.252 -0.104 6
-0.362 0.194 0.046 11
-0.456 0.067 0.081 8
-0.438 -0.081 0.036 8
-0.394 -0.078 -0.186 9
-0.355 -0.07 -0.168 8
-0.36 0.012 -0.44 9
-0.324 0.058 -0.554 8
-0.251 0.109 -0.495 8
-0.148 0.139 -0.41 9
0.037 0.17 -0.28 8
0.033 0.153 -0.252 8
0.238 0.18 0.002 7
0.247 0.167 0.203 10
0.072 0.077 0.332 9
-0.152 -0.071 0.522 8
-0.287 -0.201 0.792 8
-0.317 -0.355 0.896 9
-0.285 -0.319 0.807 8
-0.258 -0.407 0.592 9
-0.099 -0.347 0.274 8
0.199 -0.265 0.05 8
0.482 -0.172 -0.021 9
0.579 -0.049 -0.002 8
0.521 -0.044 -0.001 7
0.503 0.022 0.104 10
0.37 0.067 0.334 8
0.125 0.06 0.597 9
-0.091 -0.034 0.768 8
-0.204 -0.103 0.783 9
-0.237 -0.115 0.697 8
-0.227 -0.097 0.534 8
-0.205 -0.088 0.481 9
-0.172 -0.083 0.304 8
# end
#Thu Feb 26 20:31:12 GMT+08:00 2015-
