# Supplementary material for: Abnormal Gait Behavior Detection for Elderly Based on Enhanced Wigner-Ville Analysis and Cloud Incremental SVM Learning
Source: Hindawi journal article supplement (doi:10.1155/2016/5869238), 2016-01-01
Supplement: f1 [file 5869238.f1.zip › Supplementary Materials/Original Data/Forward fall With recovery/original__74.txt]

# Accelerometer Values
# filename:  original__74.txt
# Saving start time: Thu Feb 26 20:31:14 GMT+08:00 2015

# sensor resolution: 0.0095825195m/s^2
#Sensorvendor: KIONIX, name: KX023 Accelerometer, type: 1,version : 1, range 39.240005

# X value, Y value, Z value, time diff in ms
-0.089 -0.263 0.346 10
-0.133 -0.245 0.363 9
-0.11 -0.172 0.262 8
0.018 -0.068 0.122 9
0.188 0.018 0.012 8
0.169 0.016 0.011 8
0.244 0.053 -0.08 9
0.173 0.062 -0.119 8
0.001 0.037 -0.085 9
-0.145 -0.026 0.01 8
-0.192 -0.105 0.137 8
-0.173 -0.095 0.123 7
-0.125 -0.131 0.21 10
0.014 -0.099 0.219 9
0.174 -0.023 0.154 8
0.321 0.051 0.088 8
0.426 0.065 0.08 9
0.393 0.011 0.091 8
0.202 -0.079 0.106 8
0.181 -0.071 0.095 9
-0.057 -0.166 0.115 8
-0.216 -0.248 0.087 9
-0.268 -0.291 0.015 8
-0.229 -0.284 -0.059 7
-0.122 -0.234 -0.109 10
-0.013 -0.166 -0.126 8
-0.011 -0.15 -0.114 9
0.061 -0.101 -0.059 8
0.116 -0.1 0.05 8
0.155 -0.141 0.134 9
0.114 -0.184 0.164 8
0.007 -0.203 0.137 9
-0.097 -0.205 0.047 8
-0.087 -0.184 0.042 8
-0.163 -0.168 -0.056 9
-0.202 -0.135 -0.139 7
-0.214 -0.094 -0.19 10
-0.196 -0.033 -0.191 8
-0.086 0.321 0.091 8
0.091 0.668 0.311 9
0.082 0.602 0.279 8
0.325 0.5 0.049 9
0.386 0.21 -0.224 8
0.269 0.063 -0.38 8
0.26 0.025 -0.453 9
0.329 -0.086 -0.654 8
0.296 -0.077 -0.589 8
0.34 -0.219 -1.02 7
0.302 -0.443 -1.425 10
0.275 -0.726 -1.551 9
0.31 -0.892 -1.225 8
0.371 -0.896 -0.54 8
0.447 -0.803 0.108 9
0.402 -0.723 0.097 8
0.483 -0.56 0.392 9
0.518 -0.321 0.316 8
0.49 -0.079 -0.087 8
0.44 0.092 -0.705 9
0.374 0.17 -1.209 8
0.337 0.153 -1.088 7
0.243 0.157 -1.403 10
0.182 0.139 -1.702 8
0.139 0.12 -1.938 9
0.069 0.11 -2.049 8
-0.023 0.103 -2.085 9
-0.139 0.099 -1.992 8
-0.183 0.24 -1.716 8
-0.164 0.216 -1.545 9
-0.169 0.603 -1.244 8
-0.176 1.05 -0.779 8
-0.173 1.292 -0.309 9
-0.138 1.285 -0.142 7
-0.028 1.119 -0.144 10
0.212 1.097 -0.1 8
0.191 0.987 -0.09 8
0.54 0.959 0.034 9
0.776 0.433 0.098 8
0.75 -0.202 0.218 9
0.355 -0.511 0.33 8
-0.153 -0.598 0.278 8
-0.137 -0.538 0.251 9
-0.532 -0.538 0.049 8
-0.795 -0.49 -0.297 9
-0.804 -0.49 -0.698 6
-0.246 -0.754 -0.846 10
0.619 -1.132 -0.503 9
1.038 -1.373 0.195 8
0.935 -1.236 0.176 9
0.884 -1.391 1.031 8
0.547 -1.447 1.635 8
0.019 -1.519 1.439 9
-0.386 -1.573 0.666 8
-0.551 -1.471 -0.09 9
-0.359 -1.521 -0.632 8
-0.323 -1.369 -0.569 8
0.099 -1.67 -0.787 7
0.355 -1.87 -0.64 10
0.502 -2.022 -0.268 8
0.631 -2.117 0.107 9
0.815 -2.046 0.2 8
1.036 -1.893 -0.032 9
0.932 -1.703 -0.028 8
1.134 -1.59 -0.474 8
1.434 -1.516 -0.591 9
1.519 -1.382 -0.288 8
1.074 -1.207 -0.052 9
0.31 -0.97 0.124 8
0.279 -0.873 0.111 7
-0.416 -0.524 0.352 10
-0.838 -0.009 0.661 8
-0.825 0.442 0.865 9
-0.365 0.667 0.92 8
0.368 0.795 0.912 8
1.181 0.772 1.04 9
1.063 0.695 0.936 8
1.53 0.601 0.843 9
1.457 0.451 2.715 8
0.964 0.3 3.941 8
0.324 -0.08 4.695 9
-0.176 -0.471 4.43 6
-0.274 -0.379 3.497 10
-0.246 -0.341 3.147 9
0.416 -0.229 2.232 8
1.569 -0.186 1.713 9
2.505 -0.021 1.536 8
2.958 0.136 1.409 8
2.993 0.13 1.208 9
2.954 -0.039 0.953 8
2.659 -0.035 0.857 9
2.854 -0.354 0.654 8
3.087 -0.769 0.733 8
3.365 -0.948 1.142 7
4.113 -1.031 2.296 10
4.964 -1.175 4.428 9
5.089 -1.035 6.554 8
4.58 -0.931 5.898 8
4.004 -0.71 7.215 9
2.851 -0.659 7.355 8
1.569 -0.603 6.218 9
0.874 -0.525 4.196 8
0.508 -0.454 1.739 8
0.325 -0.566 -0.452 9
0.292 -0.51 -0.407 8
0.507 -0.748 -1.579 7
0.931 -1.026 -1.499 10
1.053 -1.462 -0.632 8
0.246 -1.75 0.156 9
-1.066 -1.775 0.706 8
-2.15 -1.587 1.083 8
-1.935 -1.428 0.974 9
-2.54 -1.0 0.971 8
-2.666 -0.341 0.341 9
-2.694 0.529 -0.877 8
-2.183 1.226 -2.06 8
-1.362 1.578 -2.782 9
-1.225 1.42 -2.504 7
-0.787 1.554 -2.699 10
-0.313 1.308 -2.32 8
0.238 0.721 -1.651 8
0.442 0.055 -1.023 9
-0.013 -0.494 -0.536 8
-0.835 -0.885 -0.021 9
-0.752 -0.797 -0.019 8
-1.569 -1.007 0.404 8
-2.151 -1.03 0.383 9
-2.111 -0.858 0.023 8
-1.679 -0.599 -0.492 9
-1.379 -0.339 -1.114 6
-0.866 -0.159 -1.495 10
-0.779 -0.143 -1.345 9
-0.137 -0.191 -1.769 8
0.183 -0.25 -2.269 9
0.197 -0.262 -2.247 8
0.06 -0.275 -1.678 8
-0.208 -0.341 -0.884 9
-0.418 -0.326 0.019 8
-0.376 -0.294 0.017 8
-0.481 0.047 0.825 9
-0.671 0.451 1.041 8
-0.904 0.794 0.831 7
-0.977 0.936 0.602 10
-0.944 0.826 0.322 8
-0.933 0.604 -0.011 9
-0.839 0.543 -0.01 8
-0.859 0.152 -0.322 9
-0.693 -0.185 -0.468 8
-0.357 -0.157 -0.202 8
-0.222 -0.11 0.047 9
-0.234 -0.268 -0.056 8
-0.286 -0.313 -0.339 9
-0.257 -0.282 -0.305 8
-0.276 -0.157 -0.788 7
-0.151 -0.017 -1.349 10
0.047 0.01 -1.705 8
0.202 -0.116 -1.703 9
0.225 -0.362 -1.333 8
0.202 -0.326 -0.725 8
0.082 -0.293 -0.652 9
-0.151 -0.803 -0.088 8
-0.401 -0.958 0.354 9
-0.427 -0.931 0.571 8
-0.175 -0.683 0.434 8
0.247 -0.363 -0.002 9
0.223 -0.326 -0.002 6
0.615 -0.171 -0.66 10
0.851 0.17 -0.903 9
0.778 0.496 -0.634 8
0.659 0.092 -0.416 9
0.705 -0.501 -0.042 8
0.688 -0.814 0.621 8
0.619 -0.733 0.559 9
0.564 -0.966 1.101 8
0.319 -0.991 1.31 9
-0.036 -0.809 1.281 8
-0.271 -0.665 0.993 8
-0.43 -0.521 0.582 7
-0.511 -0.425 0.239 10
-0.46 -0.383 0.215 9
-0.414 -0.188 0.17 8
-0.298 0.117 0.312 8
-0.282 0.351 0.087 9
-0.381 0.54 -0.468 8
-0.543 0.655 -0.936 9
-0.755 0.682 -1.208 8
-0.679 0.614 -1.087 8
-0.834 0.613 -1.3 9
-0.971 0.504 -1.643 8
-1.201 0.347 -1.908 7
-1.383 0.344 -1.724 10
-1.352 0.391 -1.275 8
-1.13 0.401 -0.956 9
-1.017 0.361 -0.86 8
-0.755 0.356 -0.813 8
-0.53 0.391 -0.851 9
-0.329 0.539 -0.806 8
-0.21 0.723 -0.658 9
-0.274 0.755 -0.543 8
-0.484 0.637 -0.438 8
-0.435 0.573 -0.394 9
-0.616 0.411 -0.103 6
-0.889 0.52 0.333 11
-1.065 0.679 0.827 8
-0.694 0.323 1.181 8
0.092 -0.324 1.313 9
0.083 -0.292 1.182 8
0.888 -0.896 1.45 9
1.32 -0.989 1.888 8
1.141 -0.421 2.214 8
0.661 0.113 2.088 9
0.194 0.332 1.604 8
-0.215 0.415 1.084 9
-0.193 0.373 0.976 6
-0.384 0.38 0.57 10
-0.329 0.403 0.414 9
-0.163 0.458 0.286 8
-0.043 0.605 -0.034 8
-0.099 0.877 -0.451 9
-0.456 1.213 -0.847 8
-0.411 1.092 -0.762 9
-0.96 1.41 -1.071 8
-1.328 1.6 -1.286 8
-1.416 1.713 -1.323 9
-1.336 1.671 -1.234 8
-1.101 1.476 -0.719 7
-0.876 1.308 0.281 10
-0.788 1.177 0.252 8
-0.623 1.03 0.998 9
-0.451 0.819 1.282 8
-0.319 0.568 1.267 9
-0.152 0.394 0.894 8
0.097 0.351 0.199 8
0.328 0.403 -0.483 9
0.295 0.363 -0.434 8
0.421 0.434 -0.823 9
0.514 0.462 -0.838 8
0.597 0.437 -0.458 7
0.691 0.346 0.215 10
0.78 0.337 0.844 8
1.013 0.285 1.137 9
0.912 0.257 1.024 8
1.163 0.208 0.934 8
0.994 0.364 0.657 9
0.455 0.51 0.385 8
-0.233 0.632 0.228 9
-0.86 0.695 0.348 8
-1.256 0.662 0.698 8
-1.13 0.596 0.628 9
-1.078 0.607 1.137 6
-0.548 0.746 1.553 10
0.03 0.946 1.619 9
0.382 1.166 1.175 8
0.522 1.367 0.315 9
0.47 1.23 0.284 8
0.428 1.325 -0.48 8
0.16 1.255 -0.797 9
-0.281 1.05 -0.68 8
-0.75 0.862 -0.338 9
-1.097 0.744 -0.142 8
-1.223 0.686 -0.248 8
-1.101 0.617 -0.223 7
-0.856 0.583 -0.28 10
-0.266 0.613 -0.276 9
0.274 0.672 -0.328 8
0.51 0.666 -0.512 8
0.185 0.503 -1.096 9
-0.488 0.347 -1.688 8
-0.439 0.313 -1.519 8
-1.012 0.387 -1.766 9
-1.512 0.494 -1.813 8
-1.74 0.391 -1.859 9
-1.667 0.146 -1.809 8
-1.463 -0.102 -1.533 7
-1.077 -0.305 -1.171 10
-0.97 -0.275 -1.054 8
-0.517 -0.373 -0.709 9
-0.145 -0.503 -0.553 8
0.042 -0.704 -0.645 8
0.056 -0.887 -0.99 9
-0.041 -0.928 -1.466 8
-0.263 -0.85 -1.984 9
-0.237 -0.765 -1.786 8
-0.566 -0.701 -2.184 8
-0.811 -0.754 -2.2 9
-0.856 -0.87 -2.0 6
-0.747 -0.893 -1.45 11
-0.409 -0.911 -0.766 8
0.112 -0.924 -0.32 8
0.101 -0.831 -0.288 9
0.511 -0.78 0.027 8
0.587 -0.742 -0.011 9
0.351 -0.657 -0.407 8
-0.055 -0.495 -0.829 8
-0.44 -0.31 -1.188 9
-0.658 -0.026 -1.441 8
-0.592 -0.023 -1.297 8
-0.687 0.222 -1.522 7
-0.697 0.227 -1.66 10
-0.525 0.083 -1.616 9
-0.243 -0.076 -1.346 8
0.385 -0.112 -0.646 8
0.346 -0.101 -0.581 9
1.01 0.108 0.328 8
1.176 0.194 0.849 9
1.225 -0.029 0.842 8
1.081 -0.041 0.449 8
0.628 0.236 -0.152 9
0.198 0.465 -0.717 8
0.178 0.418 -0.645 7
-0.094 0.559 -1.031 10
-0.295 0.58 -1.29 8
-0.434 0.52 -1.477 9
-0.547 0.464 -1.443 8
-0.591 0.264 -1.242 9
-0.76 0.361 -0.957 8
-0.684 0.324 -0.861 8
-0.811 0.547 -0.608 9
-0.52 0.33 -0.507 8
0.019 0.05 -0.398 8
0.554 -0.264 -0.333 9
0.702 -0.422 -0.45 7
0.471 -0.18 -0.476 10
0.424 -0.162 -0.429 8
0.034 0.193 -0.089 8
-0.408 0.448 0.36 9
-0.889 0.531 0.621 8
-1.296 0.469 0.687 9
-1.438 0.352 0.637 8
-1.283 0.269 0.583 8
-1.155 0.242 0.525 9
-0.824 0.279 0.469 8
-0.499 0.499 0.418 9
-0.227 0.771 0.347 6
0.066 1.011 0.236 10
0.416 1.122 0.122 9
0.709 1.001 -0.091 8
0.638 0.901 -0.082 9
0.797 0.741 -0.41 8
0.781 0.688 -0.626 8
0.571 0.751 -0.53 9
0.265 0.754 -0.188 8
-0.02 0.619 0.144 9
-0.129 0.488 0.487 8
-0.116 0.44 0.439 8
0.089 0.306 0.801 7
0.404 0.34 1.083 10
0.634 0.738 1.258 8
0.908 1.313 1.282 9
1.194 1.664 0.978 8
1.075 1.498 0.88 9
1.174 1.504 0.258 8
1.035 1.45 -0.27 8
0.692 1.337 -0.426 9
0.212 1.025 -0.341 8
-0.321 0.743 -0.056 9
-0.748 0.573 0.368 8
-0.673 0.515 0.331 7
-0.869 0.429 0.654 10
-0.829 0.491 0.82 8
-0.475 0.621 0.84 9
0.13 0.76 0.75 8
0.782 0.861 0.592 8
1.252 0.871 0.404 9
1.127 0.784 0.364 8
1.249 0.733 0.224 9
1.045 0.596 0.145 8
0.69 0.337 0.156 8
0.287 -0.034 0.222 9
-0.088 -0.351 0.23 6
-0.355 -0.49 0.184 11
-0.319 -0.441 0.166 8
-0.435 -0.484 0.094 8
-0.36 -0.454 -0.011 9
-0.057 -0.278 -0.199 8
0.315 -0.017 -0.411 9
0.539 0.15 -0.538 8
0.567 0.206 -0.56 8
0.51 0.185 -0.504 9
0.296 0.183 -0.339 8
-0.102 0.143 -0.115 8
-0.548 0.059 -0.049 7
-0.951 -0.023 -0.029 10
-1.059 -0.286 0.007 9
-0.861 -0.599 0.015 8
-0.775 -0.539 0.014 8
-0.677 -0.344 0.082 9
-0.773 0.287 0.159 8
-0.831 0.873 0.194 9
-0.5 0.68 0.17 8
-0.074 0.055 0.126 8
0.0 -0.281 0.219 9
0.0 -0.253 0.197 8
-0.095 -0.57 0.352 7
-0.279 -0.826 0.507 10
-0.461 -0.982 0.752 8
-0.507 -1.093 1.005 9
-0.423 -1.075 1.098 8
-0.38 -0.98 0.997 8
-0.342 -0.882 0.897 9
0.106 -0.799 0.695 8
0.273 -0.688 0.453 9
0.299 -0.57 0.232 8
0.193 -0.526 0.098 8
-0.072 -0.496 0.02 9
-0.065 -0.446 0.018 7
-0.349 -0.421 -0.039 10
-0.493 -0.413 -0.053 8
-0.522 -0.378 -0.009 8
-0.417 -0.326 0.051 9
-0.193 -0.256 0.095 8
0.042 -0.127 0.106 9
0.037 -0.114 0.096 8
0.229 0.047 0.022 8
0.351 0.19 -0.09 9
0.375 0.273 -0.168 8
0.268 0.261 -0.19 9
0.069 0.18 -0.163 6
-0.178 0.076 -0.129 10
-0.16 0.068 -0.116 9
-0.375 -0.036 -0.082 8
-0.468 -0.124 -0.016 9
-0.481 -0.165 0.078 8
-0.385 -0.181 0.186 8
-0.155 -0.206 0.256 9
0.119 -0.212 0.421 8
0.107 -0.191 0.379 8
0.329 -0.143 0.556 9
0.493 -0.056 0.474 8
0.626 0.048 0.241 7
0.654 0.155 -0.005 10
0.511 0.217 -0.172 8
0.246 0.222 -0.214 9
0.222 0.2 -0.193 8
-0.076 0.143 -0.152 9
-0.325 0.072 -0.082 8
-0.38 0.071 -0.086 8
-0.209 0.131 -0.161 9
-0.033 0.226 -0.186 8
0.049 0.336 -0.144 9
0.044 0.302 -0.13 8
0.107 0.377 -0.051 7
0.168 0.412 0.027 10
0.239 0.414 0.02 8
0.291 0.383 0.033 9
0.273 0.339 0.174 8
0.246 0.305 0.157 8
0.211 0.244 0.235 9
0.177 0.103 0.113 8
0.116 -0.102 0.001 9
0.065 -0.276 0.016 8
0.104 -0.407 0.005 8
0.207 -0.469 -0.077 9
0.186 -0.422 -0.069 6
0.293 -0.373 -0.169 10
0.355 -0.251 -0.263 9
0.317 -0.137 -0.269 8
0.203 -0.106 -0.041 9
0.013 -0.115 0.343 8
-0.258 -0.157 0.647 8
-0.232 -0.141 0.582 9
-0.487 -0.234 0.712 8
-0.633 -0.296 0.684 9
-0.555 -0.285 0.576 8
-0.247 -0.204 0.308 8
0.089 -0.092 -0.068 7
0.344 0.035 -0.337 10
0.31 0.031 -0.303 9
0.451 0.154 -0.437 8
0.426 0.25 -0.417 8
0.236 0.293 -0.287 9
-0.01 0.179 -0.101 8
-0.28 0.023 0.004 9
-0.553 0.018 -0.029 8
-0.497 0.016 -0.026 8
-0.645 0.014 -0.034 9
-0.665 -0.037 -0.039 8
-0.6 -0.036 -0.117 7
-0.391 0.0 -0.174 10
-0.121 0.048 -0.171 8
0.022 0.105 -0.172 9
0.02 0.094 -0.155 8
0.048 0.129 -0.174 8
0.023 0.148 -0.18 9
0.003 0.146 -0.16 8
-0.072 0.151 -0.228 9
-0.253 0.149 -0.432 8
-0.228 0.134 -0.389 8
-0.387 0.083 -0.494 9
-0.5 0.041 -0.483 7
-0.518 0.019 -0.468 10
-0.398 -0.03 -0.386 8
-0.131 -0.066 -0.17 8
0.137 -0.047 0.042 9
0.123 -0.042 0.038 8
0.219 0.0 0.111 9
0.115 0.006 0.042 8
-0.113 0.033 -0.015 8
-0.34 0.09 -0.029 9
-0.521 0.103 -0.038 8
-0.61 0.086 0.051 9
-0.549 0.078 0.046 6
-0.593 0.001 0.093 10
-0.57 -0.111 0.092 9
-0.443 -0.208 0.113 8
-0.267 -0.255 0.095 8
-0.12 -0.248 0.038 9
-0.023 -0.17 0.008 8
-0.02 -0.153 0.008 9
0.043 -0.072 0.154 8
-0.042 -0.028 0.31 8
-0.295 0.014 0.276 9
-0.53 -0.006 0.193 8
-0.477 -0.005 0.174 7
-0.399 0.093 -0.016 10
-0.359 0.084 -0.014 8
0.027 0.016 -0.169 9
0.246 -0.052 -0.109 8
0.257 -0.086 0.121 9
0.204 -0.086 0.458 8
0.166 -0.082 0.697 8
0.149 -0.073 0.628 9
0.108 -0.063 0.72 8
-0.005 -0.028 0.71 9
-0.167 0.008 0.591 8
-0.289 0.049 0.398 7
-0.356 0.094 0.198 10
-0.366 0.173 -0.003 8
-0.329 0.155 -0.003 8
# end
#Thu Feb 26 20:31:18 GMT+08:00 2015.
