# Supplementary material for: Abnormal Gait Behavior Detection for Elderly Based on Enhanced Wigner-Ville Analysis and Cloud Incremental SVM Learning
Source: Hindawi journal article supplement (doi:10.1155/2016/5869238), 2016-01-01
Supplement: f1 [file 5869238.f1.zip › Supplementary Materials/Original Data/Forward fall With recovery/original__75.txt]

# Accelerometer Values
# filename:  original__75.txt
# Saving start time: Thu Feb 26 20:31:20 GMT+08:00 2015

# sensor resolution: 0.0095825195m/s^2
#Sensorvendor: KIONIX, name: KX023 Accelerometer, type: 1,version : 1, range 39.240005

# X value, Y value, Z value, time diff in ms
0.235 -0.002 -0.16 9
0.232 0.011 -0.102 8
0.226 0.032 -0.05 9
0.227 0.032 0.023 8
0.204 0.014 0.086 8
0.224 0.012 0.078 9
0.227 -0.011 0.088 8
0.19 -0.016 0.101 9
0.14 -0.011 0.1 8
0.103 -0.019 0.053 8
0.093 -0.017 0.047 7
0.072 -0.018 -0.024 10
0.057 0.014 -0.092 9
0.049 0.064 -0.137 8
0.053 0.089 -0.15 8
0.089 0.085 -0.136 9
0.194 0.06 -0.115 8
0.284 0.034 -0.075 9
0.256 0.031 -0.068 8
0.235 0.021 0.0 8
0.144 0.01 0.062 9
0.061 0.006 0.071 8
0.006 0.015 0.042 7
-0.023 0.054 0.002 10
-0.026 0.101 -0.051 8
-0.023 0.091 -0.046 9
0.0 0.126 -0.092 8
0.035 0.155 -0.118 8
0.122 0.179 -0.107 9
0.253 0.181 -0.039 8
0.351 0.129 0.016 9
0.356 0.076 0.031 8
0.321 0.069 0.028 8
0.196 0.068 0.028 9
0.014 0.083 -0.006 7
-0.088 0.078 -0.053 10
-0.105 0.075 -0.083 8
-0.06 0.091 -0.103 8
0.019 0.126 -0.108 9
0.017 0.114 -0.098 8
0.073 0.154 -0.104 9
0.1 0.169 -0.134 8
0.107 0.185 -0.175 8
0.112 0.207 -0.201 9
0.156 0.208 -0.195 8
0.204 0.2 -0.141 9
0.184 0.18 -0.127 6
0.197 0.158 -0.077 10
0.163 0.123 -0.045 9
0.076 0.082 -0.001 8
0.006 0.049 0.04 8
0.016 0.035 0.083 9
0.015 0.031 0.074 8
0.093 0.0 0.115 9
0.166 -0.051 0.144 8
0.197 -0.061 0.156 8
0.188 -0.026 0.116 9
0.157 0.014 0.017 8
0.142 0.012 0.015 7
0.125 0.055 -0.124 10
0.143 0.094 -0.269 8
0.189 0.115 -0.383 9
0.228 0.119 -0.441 8
0.21 0.119 -0.424 9
0.153 0.115 -0.374 8
0.112 0.1 -0.318 8
0.101 0.09 -0.286 9
0.075 0.073 -0.244 8
0.059 0.059 -0.209 8
0.069 0.043 -0.21 9
0.112 0.027 -0.217 7
0.143 0.01 -0.167 10
0.143 -0.009 -0.084 8
0.129 -0.008 -0.075 8
0.142 -0.015 0.001 9
0.168 -0.005 0.05 8
0.169 0.009 0.047 9
0.134 0.028 -0.002 8
0.054 0.04 -0.057 8
-0.048 0.042 -0.082 9
-0.043 0.038 -0.074 8
-0.114 0.033 -0.081 9
-0.116 0.031 -0.071 6
-0.004 0.033 -0.057 10
0.2 0.035 -0.069 9
0.413 0.048 -0.067 8
0.515 0.061 0.016 9
0.463 0.055 0.014 8
0.401 0.046 0.134 8
0.249 0.033 0.244 9
0.059 0.033 0.294 8
0.139 0.007 0.189 9
0.137 -0.037 -0.139 8
0.123 -0.033 -0.125 8
-0.143 -0.016 -0.47 7
-0.163 0.121 -0.474 10
-0.023 0.263 -0.357 9
0.02 0.222 -0.363 8
-0.067 0.081 -0.411 8
-0.126 -0.074 -0.491 9
-0.113 -0.067 -0.442 8
-0.103 -0.269 -0.506 8
-0.037 -0.45 -0.594 9
0.0 -0.557 -0.731 8
-0.047 -0.565 -0.812 9
-0.116 -0.515 -0.708 8
-0.104 -0.463 -0.637 7
-0.167 -0.42 -0.409 10
-0.214 -0.457 -0.319 8
-0.189 -0.531 -0.479 9
-0.018 -0.501 -0.687 8
0.317 -0.332 -0.69 8
0.657 -0.151 -0.541 9
0.785 0.022 -0.389 8
0.706 0.02 -0.35 9
0.56 0.127 -0.14 8
0.257 0.059 0.066 8
-0.03 -0.114 0.127 9
-0.274 -0.263 0.001 6
-0.492 -0.286 -0.273 11
-0.595 -0.222 -0.493 8
-0.535 -0.2 -0.444 8
-0.459 -0.004 -0.548 9
-0.26 0.245 -0.602 8
-0.034 0.345 -0.68 9
0.126 0.238 -0.862 8
0.195 -0.035 -1.101 8
0.197 -0.33 -1.344 9
0.178 -0.297 -1.21 8
0.175 -0.521 -1.398 8
0.201 -0.673 -1.566 7
0.18 -0.749 -1.724 10
0.111 -0.726 -1.73 9
0.005 -0.556 -1.441 8
-0.139 -0.4 -0.863 8
-0.125 -0.36 -0.776 9
-0.133 -0.465 -0.179 8
0.137 -0.635 0.322 9
0.392 -0.777 0.563 8
0.421 -0.987 0.435 8
0.474 -1.137 0.268 9
0.427 -1.024 0.241 8
0.55 -1.195 0.325 7
0.648 -1.425 0.643 10
0.681 -1.675 0.925 8
0.586 -1.872 1.009 9
0.469 -1.858 0.978 8
0.449 -1.642 0.878 9
0.404 -1.478 0.79 8
0.357 -1.377 0.334 8
0.184 -1.573 -0.605 9
-0.019 -1.815 -0.979 8
-0.287 -1.682 -0.247 8
-0.565 -1.262 0.477 9
-0.508 -1.136 0.43 7
-0.557 -0.798 0.436 10
-0.333 -0.592 0.08 8
0.133 -0.544 -0.24 8
0.647 -0.478 -0.53 9
0.813 -0.27 -1.065 8
0.571 0.02 -1.503 9
0.221 0.243 -1.624 8
0.199 0.219 -1.462 8
-0.046 0.347 -1.487 9
-0.084 0.54 -1.37 8
0.23 0.579 -1.142 9
0.77 0.325 -0.563 6
1.129 0.018 0.482 10
1.22 -0.322 1.763 9
1.098 -0.29 1.586 8
1.099 -0.75 2.715 9
0.892 -1.147 3.341 8
0.279 -1.37 3.285 8
-0.54 -1.356 2.643 9
-0.379 -1.471 1.771 8
0.78 -1.603 1.376 9
0.702 -1.443 1.238 8
1.673 -1.269 1.535 8
2.055 -1.335 1.851 7
1.746 -1.583 2.224 10
1.63 -1.87 3.332 8
2.622 -2.456 5.399 9
2.36 -3.101 7.684 8
3.707 -2.79 6.916 9
4.857 -3.613 8.446 8
5.275 -3.825 8.976 8
4.458 -3.267 8.597 9
3.05 -2.658 7.537 8
1.706 -1.969 6.842 9
1.535 -1.772 6.158 8
0.781 -1.243 6.387 7
1.285 -0.997 6.849 10
2.853 -0.941 6.785 8
4.221 -0.806 6.016 9
4.687 -0.572 5.006 8
4.205 -0.356 4.207 8
3.785 -0.321 3.786 9
2.712 -0.096 3.36 8
1.352 0.191 3.065 9
-0.151 0.539 2.412 8
-1.587 0.954 1.071 8
-2.679 1.314 -0.702 9
-2.411 1.183 -0.632 6
-2.879 1.25 -2.193 11
-2.679 1.086 -3.411 8
-2.27 1.045 -4.707 8
-2.08 1.201 -6.046 9
-1.697 1.176 -6.982 8
-1.316 1.118 -7.323 8
-1.478 1.345 -7.281 9
-1.33 1.211 -6.552 8
-1.655 1.413 -6.295 9
-2.074 1.456 -5.772 8
-2.509 1.376 -5.16 8
-2.824 1.227 -4.417 7
-3.013 1.13 -3.426 10
-2.686 1.015 -2.274 9
-2.417 0.914 -2.046 8
-1.74 0.776 -0.973 8
-1.1 0.669 -0.227 9
-0.555 0.541 0.152 8
-0.337 0.405 0.245 9
-0.399 0.282 0.12 8
-0.359 0.254 0.108 8
-0.492 0.195 -0.041 9
-0.574 0.228 -0.203 8
-0.553 0.288 -0.415 7
-0.285 0.288 -0.488 10
0.075 0.235 -0.339 8
0.285 0.145 -0.165 9
0.257 0.13 -0.148 8
0.399 0.04 -0.145 8
0.423 0.013 -0.395 9
0.314 0.035 -0.729 8
0.125 0.081 -1.037 9
-0.144 0.117 -1.316 8
-0.435 0.126 -1.478 8
-0.391 0.113 -1.33 9
-0.6 0.08 -1.373 7
-0.613 -0.072 -1.238 10
-0.417 -0.322 -0.879 8
-0.075 -0.554 -0.474 8
0.227 -0.719 -0.216 9
0.379 -0.808 -0.087 8
0.341 -0.727 -0.078 9
0.418 -0.734 0.023 8
0.557 -0.677 0.266 8
0.789 -0.603 0.727 9
1.039 -0.542 1.358 8
1.329 -0.527 2.094 9
1.196 -0.474 1.884 6
1.46 -0.526 2.48 10
1.558 -0.614 2.603 9
1.533 -0.682 2.281 8
1.458 -0.7 1.728 9
1.354 -0.687 1.174 8
1.232 -0.724 0.798 8
1.13 -0.809 0.661 9
1.017 -0.728 0.595 8
0.965 -0.791 0.593 8
0.859 -0.822 0.508 9
0.521 -0.849 0.436 8
0.054 -0.895 0.591 7
-0.304 -0.949 0.927 10
-0.274 -0.854 0.834 8
-0.707 -0.614 0.751 9
-0.73 -0.814 1.357 8
-0.533 -0.907 1.26 9
-0.559 -0.34 0.939 8
-0.615 0.146 0.266 8
-0.771 0.629 -0.532 9
-0.694 0.566 -0.479 8
-0.764 0.847 -1.066 9
-0.772 0.895 -1.211 8
-0.857 0.772 -0.988 7
-1.013 0.615 -0.603 10
-1.092 0.475 -0.284 8
-1.025 0.416 -0.151 9
-0.923 0.375 -0.136 8
-0.684 0.449 -0.292 8
-0.423 0.654 -0.71 9
-0.317 0.927 -1.229 8
-0.42 1.196 -1.817 8
-0.712 1.467 -2.468 9
-1.052 1.616 -2.967 8
-0.947 1.455 -2.67 9
-1.286 1.366 -2.703 6
-1.478 1.163 -2.064 10
-1.573 1.293 -1.138 9
-1.33 1.168 -0.324 8
-0.518 0.498 0.299 9
0.075 0.43 0.842 8
0.067 0.387 0.758 8
0.218 0.729 1.197 9
0.183 0.894 1.287 8
-0.017 1.001 1.078 9
-0.21 1.056 0.869 8
-0.228 1.093 0.825 8
-0.206 0.984 0.742 7
-0.042 0.996 0.687 10
0.026 0.98 0.644 9
-0.117 0.966 0.69 8
-0.357 0.929 0.744 8
-0.693 0.858 0.776 9
-1.033 0.789 0.82 8
-1.165 0.738 0.933 8
-1.048 0.665 0.84 9
-0.844 0.749 1.049 8
-0.467 0.857 1.241 9
-0.258 0.851 1.207 8
-0.402 0.877 0.821 7
-0.835 0.921 0.286 10
-0.752 0.906 -0.261 8
-0.677 0.815 -0.235 9
-1.756 0.705 -0.743 8
-2.042 0.48 -1.038 8
-2.036 0.135 -1.043 9
-1.594 -0.448 -0.553 8
-1.143 -0.612 0.346 9
-1.028 -0.551 0.312 8
-0.797 -0.419 1.084 8
-0.144 -1.069 1.239 9
0.333 -1.416 0.815 7
0.187 -0.973 0.27 10
0.078 -0.638 -0.389 8
0.099 -0.399 -1.124 8
0.089 -0.359 -1.011 9
0.117 -0.2 -1.509 8
0.136 -0.127 -1.826 9
0.123 -0.13 -2.063 8
-0.013 -0.127 -2.247 8
-0.179 -0.034 -2.542 9
-0.11 0.005 -3.06 8
-0.099 0.004 -2.754 8
0.106 0.05 -3.283 7
0.073 0.315 -3.433 10
-0.138 0.538 -3.183 9
-0.456 0.658 -2.827 8
-0.697 0.537 -2.536 8
-0.793 -0.031 -2.435 9
-0.714 -0.028 -2.191 8
-0.899 -0.43 -2.001 9
-1.092 -0.46 -1.571 8
-1.294 -0.862 -1.344 8
-1.297 -1.118 -1.098 9
-1.317 -0.419 -0.63 8
-1.186 -0.377 -0.567 7
-1.24 0.358 -0.252 10
-0.932 0.541 -0.355 8
-0.493 0.392 -0.567 9
-0.132 0.169 -0.626 8
0.037 0.009 -0.652 9
0.027 -0.084 -0.687 8
-0.131 -0.118 -0.92 8
-0.118 -0.106 -0.828 9
-0.409 -0.003 -1.198 8
-0.791 0.278 -1.449 8
-1.084 0.565 -1.651 9
-1.1 0.706 -1.796 7
-0.871 0.728 -1.803 10
-0.784 0.655 -1.622 8
-0.426 0.634 -1.46 8
-0.145 0.596 -1.086 9
-0.054 0.546 -0.726 8
-0.334 0.289 -0.621 9
-0.486 0.136 -0.404 8
-0.381 0.27 0.026 8
-0.343 0.243 0.023 9
-0.493 0.341 0.219 8
-0.648 0.439 0.144 9
-0.627 0.571 -0.026 6
-0.414 0.687 -0.138 10
-0.07 0.81 -0.169 9
0.204 0.925 -0.118 8
0.184 0.833 -0.106 9
0.201 0.866 -0.061 8
0.036 0.757 -0.188 8
-0.046 0.74 -0.28 9
0.075 0.92 -0.195 8
0.139 0.994 -0.195 9
0.11 1.019 -0.226 8
0.099 0.917 -0.204 8
0.194 0.967 -0.108 7
0.423 0.936 0.121 10
0.704 0.725 0.361 9
0.967 0.731 0.716 8
1.166 0.968 1.063 8
1.177 0.986 1.102 9
1.059 0.888 0.992 8
0.924 0.855 1.036 8
0.697 0.818 1.099 9
0.454 0.799 0.929 8
0.263 0.84 0.634 9
0.213 0.899 0.4 8
0.192 0.809 0.36 7
0.302 0.889 0.158 10
0.43 0.842 -0.031 8
0.639 0.88 0.059 9
0.843 1.116 0.49 8
0.836 1.169 0.795 8
0.688 1.131 0.914 9
0.475 1.172 0.983 8
0.427 1.055 0.884 9
0.246 1.139 0.76 8
0.129 1.204 0.39 8
0.056 1.216 -0.039 9
0.023 1.212 -0.435 6
0.074 1.209 -0.786 11
0.066 1.088 -0.707 8
0.187 1.1 -0.636 8
0.249 1.174 -0.848 9
0.237 1.338 -0.648 8
0.234 1.469 -0.539 9
0.222 1.457 -0.411 8
0.145 1.371 -0.152 8
0.13 1.234 -0.137 9
-0.032 1.115 0.229 8
-0.204 0.93 0.636 8
-0.227 0.692 0.959 7
0.057 0.494 1.187 10
0.552 0.387 1.329 9
0.944 0.183 1.281 8
0.85 0.165 1.153 8
1.067 0.215 1.133 9
1.051 0.349 1.03 8
0.812 0.144 0.657 9
0.581 -0.075 0.264 8
0.443 -0.271 -0.152 8
0.371 -0.431 -0.533 9
0.334 -0.388 -0.48 8
0.303 -0.477 -0.745 7
0.277 -0.531 -0.932 10
0.25 -0.569 -0.994 8
0.255 -0.642 -0.863 9
0.267 -0.694 -0.612 8
0.179 -0.633 -0.383 8
0.161 -0.57 -0.345 9
-0.148 -0.467 -0.215 8
-0.597 -0.353 -0.223 9
-1.031 -0.215 -0.423 8
-1.325 -0.029 -0.725 8
-1.362 0.173 -0.928 9
-1.226 0.155 -0.835 7
-0.903 0.293 -0.89 10
-0.552 0.391 -0.85 8
-0.615 0.392 -0.842 8
-0.644 0.353 -0.654 9
-0.486 0.307 -0.36 8
-0.373 0.25 -0.049 9
-0.291 0.239 0.335 8
-0.262 0.215 0.302 8
-0.4 0.17 0.429 9
-0.589 0.123 0.37 8
-0.479 0.108 0.286 9
-0.174 0.091 0.077 6
0.146 0.049 -0.109 10
0.132 0.044 -0.098 9
0.331 0.036 -0.014 8
0.526 0.054 0.376 9
0.586 0.005 0.725 8
0.332 -0.1 0.621 8
0.022 -0.215 0.294 9
-0.313 -0.288 0.017 8
-0.281 -0.259 0.015 9
-0.58 -0.33 -0.281 8
-0.671 -0.365 -0.465 8
-0.463 -0.296 -0.383 7
-0.094 -0.288 -0.059 10
0.163 -0.208 0.498 8
0.337 -0.081 0.872 9
0.303 -0.073 0.785 8
0.393 -0.042 0.704 9
0.312 -0.014 0.417 8
0.127 0.011 0.129 8
-0.092 0.07 -0.035 9
-0.289 0.166 0.099 8
-0.357 0.237 0.404 9
-0.321 0.214 0.363 8
-0.257 0.287 0.328 7
-0.039 0.269 0.039 10
0.194 0.175 -0.266 8
0.237 0.172 -0.608 9
0.133 0.184 -0.814 8
-0.119 0.147 -0.734 8
-0.107 0.132 -0.66 9
-0.435 0.083 -0.423 8
-0.624 0.103 -0.176 9
-0.433 0.075 0.098 8
-0.059 -0.24 0.176 8
0.046 -0.531 0.196 9
0.042 -0.478 0.176 6
-0.144 -0.435 0.456 10
-0.377 -0.35 0.746 9
-0.495 -0.418 0.877 8
-0.489 -0.606 0.923 9
-0.428 -0.751 0.94 8
-0.387 -0.749 0.965 8
-0.348 -0.674 1.046 9
-0.305 -0.607 0.942 8
-0.185 -0.552 1.003 9
0.002 -0.49 0.996 8
0.172 -0.446 0.973 8
0.267 -0.395 0.856 7
0.314 -0.35 0.605 10
0.282 -0.315 0.544 9
0.314 -0.297 0.283 8
0.277 -0.262 0.072 8
0.18 -0.217 -0.042 9
0.087 -0.189 -0.062 8
0.032 -0.172 -0.057 9
0.048 -0.148 -0.03 8
0.043 -0.133 -0.027 8
0.105 -0.101 -0.022 9
0.177 -0.09 -0.071 8
0.249 -0.114 -0.108 7
0.245 -0.126 -0.084 10
0.195 -0.116 -0.044 8
0.161 -0.114 -0.026 9
0.145 -0.103 -0.024 8
0.121 -0.1 -0.034 8
0.095 -0.097 -0.034 9
0.055 -0.118 0.019 8
-0.001 -0.14 0.069 9
-0.025 -0.123 0.068 8
0.051 -0.113 0.032 8
0.046 -0.102 0.029 9
0.136 -0.055 -0.078 7
0.28 -0.149 -0.045 10
0.356 -0.251 0.267 8
0.246 -0.135 0.637 8
0.112 -0.064 0.842 9
-0.08 -0.025 0.81 8
-0.072 -0.022 0.729 9
-0.337 0.031 0.491 8
-0.541 0.076 0.123 8
-0.541 0.161 -0.352 9
-0.349 0.323 -0.83 8
-0.095 0.484 -1.166 9
-0.086 0.436 -1.05 6
0.078 0.524 -1.283 10
0.072 0.51 -1.335 9
-0.09 0.426 -1.1 8
-0.287 0.283 -0.657 9
-0.41 0.081 -0.161 8
-0.461 -0.066 0.2 8
-0.414 -0.06 0.18 9
-0.415 -0.127 0.299 8
-0.355 -0.158 0.296 8
-0.2 -0.165 0.232 9
0.0 -0.153 0.024 8
0.156 -0.112 -0.294 7
0.278 -0.009 -0.623 10
0.25 -0.008 -0.561 8
0.317 0.125 -0.737 9
0.256 0.191 -0.666 8
0.109 0.102 -0.36 9
0.227 -0.187 0.055 8
0.276 -0.496 0.32 8
-0.244 -0.472 0.455 9
-0.22 -0.425 0.409 8
-0.852 -0.055 0.672 9
-1.039 0.202 0.969 8
-0.653 0.013 0.951 7
-0.163 -0.178 0.668 10
0.075 -0.114 0.386 8
0.146 -0.051 0.195 9
0.132 -0.046 0.176 8
0.019 -0.015 0.112 8
-0.157 -0.017 0.142 9
-0.258 -0.076 0.183 8
-0.395 -0.101 0.046 8
-0.452 -0.109 -0.174 9
-0.354 -0.132 -0.266 8
-0.319 -0.119 -0.24 9
-0.22 -0.061 -0.263 6
-0.143 0.03 -0.13 10
-0.097 0.102 0.025 9
-0.075 0.12 0.085 8
-0.042 0.092 0.186 9
-0.038 0.083 0.167 8
-0.018 0.056 0.265 8
-0.015 0.038 0.277 9
-0.018 0.024 0.232 8
-0.025 0.052 0.177 9
-0.032 0.122 0.108 8
-0.077 0.164 0.041 8
-0.069 0.148 0.037 7
-0.088 0.137 0.015 10
-0.112 0.081 -0.029 9
-0.302 0.161 -0.059 8
-0.327 0.239 0.045 8
-0.082 0.117 0.141 9
0.17 0.01 0.145 8
0.153 0.009 0.13 9
0.366 -0.012 0.068 8
0.454 0.005 -0.07 8
0.364 0.043 -0.223 9
0.154 0.067 -0.321 8
-0.098 0.037 -0.35 7
-0.36 -0.019 -0.34 10
-0.324 -0.017 -0.306 8
-0.474 -0.063 -0.197 9
-0.546 -0.107 -0.044 8
-0.583 -0.117 0.006 8
-0.396 -0.108 -0.046 9
-0.106 -0.087 -0.028 8
0.06 -0.02 -0.062 9
0.054 -0.018 -0.056 8
0.157 0.009 -0.244 8
0.191 0.027 -0.415 9
0.148 0.084 -0.465 6
0.103 0.12 -0.345 11
0.083 0.116 -0.168 8
0.067 0.125 -0.017 8
0.061 0.112 -0.015 9
0.036 0.112 0.069 8
0.004 0.049 0.102 9
-0.026 -0.01 0.086 8
-0.009 -0.008 0.007 8
0.036 -0.011 -0.05 9
0.032 -0.056 -0.018 8
0.029 -0.051 -0.016 9
0.075 -0.091 0.013 6
0.071 -0.113 -0.018 10
0.003 -0.123 -0.09 9
-0.167 -0.124 -0.192 8
# end
#Thu Feb 26 20:31:25 GMT+08:00 2015 
