# Supplementary material for: Abnormal Gait Behavior Detection for Elderly Based on Enhanced Wigner-Ville Analysis and Cloud Incremental SVM Learning
Source: Hindawi journal article supplement (doi:10.1155/2016/5869238), 2016-01-01
Supplement: f1 [file 5869238.f1.zip › Supplementary Materials/Original Data/Forward fall With recovery/original__76.txt]

# Accelerometer Values
# filename:  original__76.txt
# Saving start time: Thu Feb 26 20:31:27 GMT+08:00 2015

# sensor resolution: 0.0095825195m/s^2
#Sensorvendor: KIONIX, name: KX023 Accelerometer, type: 1,version : 1, range 39.240005

# X value, Y value, Z value, time diff in ms
-0.006 -0.183 -0.145 10
-0.005 -0.159 -0.354 8
-0.015 -0.123 -0.501 8
-0.058 -0.093 -0.512 9
-0.052 -0.084 -0.461 8
-0.095 -0.091 -0.364 9
-0.089 -0.101 -0.192 8
-0.047 -0.107 0.007 8
0.003 -0.124 0.171 9
0.05 -0.144 0.272 8
0.257 -0.064 0.357 8
0.232 -0.057 0.321 7
0.39 0.043 0.332 10
0.26 0.202 0.334 9
0.352 0.523 0.437 8
0.461 0.537 0.369 8
0.218 0.121 0.255 9
-0.001 -0.204 0.401 8
-0.001 -0.184 0.361 9
-0.082 -0.288 0.483 8
0.002 -0.331 0.425 8
0.258 -0.234 0.268 9
0.518 -0.026 0.029 8
0.632 0.107 -0.17 7
0.547 0.104 -0.198 10
0.492 0.094 -0.178 8
0.255 -0.055 -0.01 9
-0.003 -0.289 0.321 8
-0.165 -0.463 0.622 9
-0.122 -0.548 0.68 8
0.164 -0.551 0.569 8
0.453 -0.52 0.338 9
0.407 -0.468 0.304 8
0.569 -0.48 -0.018 9
0.632 -0.435 -0.254 8
0.51 -0.321 -0.343 7
0.214 -0.213 -0.348 10
-0.13 -0.169 -0.389 8
-0.332 -0.185 -0.536 9
-0.299 -0.167 -0.483 8
-0.27 -0.179 -0.646 8
-0.085 -0.15 -0.797 9
0.15 -0.024 -0.972 8
0.379 0.14 -1.121 8
0.719 0.339 -1.106 9
0.647 0.305 -0.995 8
0.835 0.402 -0.879 9
0.647 0.208 -0.863 6
0.371 -0.042 -0.815 10
0.223 -0.163 -0.821 9
0.227 -0.213 -1.075 8
0.302 -0.269 -1.364 9
0.272 -0.242 -1.227 8
0.444 -0.314 -1.336 8
0.609 -0.306 -1.259 9
0.597 -0.173 -1.126 8
0.415 0.143 -0.794 9
0.186 0.5 -0.179 8
-0.058 0.704 0.464 8
-0.052 0.634 0.418 7
-0.536 0.559 0.863 10
-1.235 0.218 1.046 9
-1.682 -0.141 0.883 8
-1.591 -0.438 0.436 8
-1.017 -0.591 0.039 9
-0.123 -0.618 0.036 8
-0.111 -0.557 0.032 8
0.827 -0.574 0.458 9
1.303 -0.608 0.893 8
1.063 -0.587 0.978 9
0.464 -0.453 0.645 8
-0.077 -0.29 0.09 7
-0.416 -0.199 -0.514 10
-0.374 -0.179 -0.462 8
-0.434 -0.154 -1.006 9
-0.247 -0.156 -1.296 8
0.076 -0.18 -1.335 8
0.489 -0.164 -1.243 9
0.804 -0.075 -1.077 8
0.921 0.011 -0.901 9
0.829 0.009 -0.81 8
0.798 0.058 -0.687 8
0.724 0.058 -0.574 9
0.684 0.041 -0.514 6
0.652 -0.002 -0.514 11
0.504 -0.002 -0.678 8
0.453 0.0 -1.124 8
0.226 0.0 -1.012 9
0.174 -0.208 -1.697 8
0.352 -0.448 -2.427 9
0.674 -0.557 -2.9 8
0.949 -0.703 -2.949 8
0.992 -1.024 -2.595 9
0.893 -0.921 -2.335 8
0.675 -1.279 -1.735 8
0.304 -1.536 -0.996 7
-0.101 -1.785 -0.191 10
-0.486 -1.936 0.56 9
-0.786 -1.917 0.965 8
-1.012 -1.762 0.888 8
-0.911 -1.585 0.799 9
-1.006 -1.578 0.388 8
-0.738 -1.679 -0.046 9
0.042 -1.682 -0.104 8
0.928 -1.679 0.286 8
1.298 -1.594 0.771 9
1.071 -1.33 1.094 8
0.964 -1.197 0.984 7
0.478 -0.85 1.128 10
0.093 -0.477 1.054 8
-0.076 0.026 0.831 9
0.035 0.322 0.501 8
0.496 0.389 0.338 9
1.228 0.481 0.674 8
1.105 0.433 0.606 8
1.813 0.405 1.463 9
2.224 0.337 2.636 8
2.422 0.117 3.838 9
2.535 -0.187 4.915 8
2.655 -0.333 5.811 7
2.756 -0.267 6.367 10
2.48 -0.24 5.73 8
2.462 -0.225 5.551 8
2.148 -0.154 4.531 9
1.585 0.17 3.159 8
1.263 0.396 1.838 9
1.522 0.573 1.028 8
2.003 0.868 1.098 8
1.803 0.781 0.988 9
1.8 1.218 1.412 8
1.247 1.689 1.182 9
0.793 1.921 0.057 6
0.702 1.896 -1.244 10
0.651 1.796 -1.954 9
0.586 1.617 -1.758 8
0.241 1.432 -1.582 9
-0.228 1.054 -1.404 8
0.222 0.346 -0.158 8
1.59 -0.355 2.151 9
2.345 -0.776 4.292 8
1.738 -1.022 4.42 8
1.564 -0.92 3.978 9
0.422 -1.262 2.704 8
0.025 -1.915 1.882 7
0.771 -2.686 2.88 10
2.239 -3.567 5.435 8
3.739 -4.419 7.944 9
4.2 -4.739 9.151 8
3.78 -4.265 8.236 9
2.698 -3.957 7.643 8
0.638 -3.354 5.448 8
-1.438 -2.896 2.851 9
-2.706 -2.686 0.707 8
-2.955 -2.504 -0.601 9
-2.613 -1.962 -1.328 8
-2.352 -1.766 -1.195 7
-1.458 -0.902 -2.096 10
-0.415 0.216 -3.537 8
0.119 1.613 -5.092 9
0.391 2.871 -5.987 8
0.541 3.557 -5.774 8
0.53 3.576 -4.635 9
0.477 3.218 -4.172 8
0.239 2.592 -2.522 9
-0.121 1.517 -0.526 8
-0.482 0.461 1.201 8
-0.943 -0.321 2.023 9
-0.848 -0.289 1.821 6
-1.949 -0.558 0.26 11
-1.754 -0.503 0.234 8
-2.084 -0.444 -1.445 8
-2.445 -0.288 -3.038 9
-3.05 0.117 -4.472 8
-3.327 0.377 -5.386 8
-2.963 0.556 -5.52 9
-2.667 0.501 -4.968 8
-2.065 0.766 -4.456 9
-1.522 1.101 -3.279 8
-1.102 1.349 -1.808 8
-0.957 1.407 -0.615 7
-1.062 1.368 0.12 10
-1.161 1.268 0.352 9
-1.045 1.141 0.317 8
-1.029 1.042 0.076 8
-0.734 0.916 -0.155 9
-0.219 0.707 -0.022 8
0.162 0.347 0.376 9
0.28 -0.132 0.888 8
0.074 -0.509 1.592 8
0.067 -0.458 1.433 9
-0.373 -0.688 2.637 8
-0.671 -0.851 4.482 7
-0.672 -0.917 6.474 10
-0.353 -0.9 7.681 8
0.101 -0.696 7.487 9
0.503 -0.289 5.829 8
0.452 -0.26 5.246 8
0.726 0.238 2.505 9
0.723 0.681 -0.543 8
0.525 0.896 -2.847 9
0.263 0.95 -4.0 8
0.246 0.888 -4.173 8
0.474 0.574 -3.782 9
0.427 0.517 -3.404 7
0.503 0.103 -3.076 10
0.224 -0.207 -3.205 8
-0.306 -0.509 -3.745 8
-1.05 -0.699 -4.297 9
-1.966 -0.654 -4.487 8
-2.64 -0.633 -3.969 9
-2.376 -0.569 -3.572 8
-2.575 -0.765 -2.357 8
-2.285 -1.12 -0.968 9
-1.702 -1.468 0.156 8
-1.139 -1.394 0.731 9
-1.025 -1.255 0.658 6
-0.265 -1.867 -0.115 10
-0.238 -1.681 -0.103 9
0.959 -1.463 -0.872 8
0.915 -1.037 -1.528 9
0.763 -0.776 -1.796 8
0.425 -0.658 -1.505 8
-0.304 -0.276 -0.746 9
-0.274 -0.249 -0.671 8
-1.061 0.227 0.242 8
-1.124 -0.115 0.91 9
-0.527 -0.887 1.305 8
0.227 -1.401 1.635 7
1.054 -1.497 2.038 10
1.669 -1.313 2.261 8
1.502 -1.182 2.035 9
1.506 -1.029 2.0 8
0.975 -0.785 1.865 9
0.133 -0.423 1.715 8
-0.532 -0.208 1.645 8
-0.811 -0.024 1.616 9
-0.777 0.33 1.468 8
-0.699 0.297 1.321 9
-0.24 0.188 0.934 8
0.47 -0.146 0.394 7
0.991 -0.064 -0.048 10
1.296 -0.003 -0.35 8
1.301 -0.071 -0.577 9
0.992 -0.195 -0.73 8
0.893 -0.175 -0.657 8
0.931 -0.109 -0.456 9
1.122 0.129 -0.071 8
0.963 0.169 0.192 9
0.76 0.321 0.47 8
0.619 0.549 0.553 8
0.666 0.398 0.292 9
0.6 0.358 0.263 6
0.729 0.178 -0.176 10
0.546 0.389 -0.621 9
0.108 0.663 -0.985 8
-0.326 0.848 -1.232 9
-0.532 0.984 -1.29 8
-0.447 0.936 -1.06 8
-0.402 0.842 -0.954 9
-0.253 0.671 -0.28 8
-0.175 0.482 0.475 9
-0.056 0.297 0.809 8
0.136 0.211 0.738 8
0.122 0.19 0.664 7
0.255 0.63 -0.491 10
0.23 0.567 -0.442 9
0.205 1.07 -1.188 8
-0.18 1.605 -1.872 8
-0.742 2.111 -2.403 9
-1.251 2.548 -2.73 8
-1.627 2.813 -2.579 9
-1.465 2.531 -2.321 8
-1.558 2.46 -1.601 8
-1.114 1.898 -0.293 9
-0.33 1.186 1.39 8
0.354 0.626 2.728 7
0.724 0.302 3.099 10
0.667 0.228 2.512 8
0.601 0.205 2.261 9
0.216 0.292 1.235 8
-0.287 0.527 0.303 8
-0.708 0.834 -0.219 9
-0.956 1.062 -0.285 8
-0.993 1.169 -0.028 9
-0.747 1.164 0.421 8
-0.672 1.048 0.379 8
-0.168 0.817 1.138 9
0.401 0.41 2.21 7
0.506 0.042 3.163 10
0.038 -0.174 3.409 8
-0.522 -0.139 2.612 8
-0.845 0.126 1.249 9
-0.76 0.114 1.124 8
-0.795 0.457 0.011 9
-0.872 0.847 -0.628 8
-0.416 0.944 -0.843 8
0.228 0.903 -0.914 9
0.236 1.087 -1.149 8
0.116 1.173 -1.488 9
0.104 1.055 -1.34 6
-0.038 1.032 -1.702 10
-0.384 1.002 -1.959 9
-0.497 0.965 -1.754 8
-0.459 0.898 -1.278 8
-0.571 0.822 -1.112 9
-0.514 0.74 -1.309 8
-0.483 0.795 -1.178 9
-0.375 0.929 -1.612 8
-0.247 1.031 -2.032 8
-0.196 1.111 -2.181 9
-0.24 1.099 -2.041 8
-0.216 0.989 -1.837 7
-0.311 0.794 -1.56 10
-0.357 0.437 -1.265 8
-0.128 0.004 -1.056 9
0.387 -0.586 -0.898 8
0.728 -1.175 -0.461 9
0.652 -1.443 0.317 8
0.26 -1.482 1.05 8
0.234 -1.334 0.945 9
-0.171 -1.381 1.371 8
-0.398 -1.356 1.464 9
-0.491 -1.136 1.253 8
-0.452 -0.762 0.781 7
-0.335 -0.405 0.18 10
-0.139 -0.173 -0.382 8
-0.125 -0.156 -0.344 9
0.12 -0.014 -0.829 8
0.284 0.061 -1.255 8
0.296 0.089 -1.681 9
0.164 0.092 -2.183 8
-0.04 0.055 -2.653 8
-0.273 -0.075 -2.938 9
-0.246 -0.067 -2.644 8
-0.506 -0.281 -2.76 9
-0.719 -0.511 -2.793 6
-0.841 -0.713 -2.751 10
-0.914 -0.813 -2.616 9
-1.005 -0.737 -2.451 8
-1.159 -0.476 -2.31 9
-1.043 -0.428 -2.079 8
-1.193 -0.135 -2.062 8
-1.204 0.028 -2.183 9
-1.001 0.099 -2.323 8
-0.699 0.076 -2.435 9
-0.473 -0.052 -2.534 8
-0.426 -0.046 -2.509 8
-0.299 -0.236 -2.258 7
-0.282 -0.418 -1.985 10
-0.389 -0.514 -1.48 9
-0.589 -0.534 -0.809 8
-0.741 -0.466 -0.087 8
-0.652 -0.274 0.381 9
-0.586 -0.247 0.343 8
-0.269 0.039 0.423 8
0.163 0.315 0.191 9
0.579 0.508 -0.264 8
0.752 0.655 -0.694 9
0.552 0.801 -0.923 8
0.497 0.721 -0.831 7
-0.038 0.813 -0.927 10
-0.733 0.88 -1.022 8
-1.229 0.995 -0.905 9
-1.471 1.203 -0.599 8
-1.585 1.456 -0.494 8
-1.425 1.264 -0.547 9
-0.584 1.21 -0.274 8
-0.526 1.089 -0.247 9
0.773 1.617 0.344 8
1.697 1.957 0.848 8
1.941 1.988 1.349 9
1.607 1.728 1.851 6
0.898 1.376 2.354 11
0.055 1.234 2.85 8
0.049 1.11 2.565 8
-0.624 1.195 2.908 9
-0.948 1.373 2.89 8
-0.947 1.454 2.579 9
-0.656 1.374 2.121 8
-0.155 1.272 1.58 8
0.366 1.164 1.105 9
0.329 1.047 0.995 8
0.735 0.878 0.797 9
0.942 0.69 0.96 6
0.83 0.405 1.385 10
0.305 0.017 1.666 9
-0.284 -0.195 1.756 8
-0.255 -0.176 1.829 8
-0.386 0.026 1.646 9
-0.149 0.33 1.336 8
0.053 0.398 0.485 9
0.12 0.334 -0.468 8
0.148 0.254 -1.066 8
0.21 0.191 -1.14 9
0.189 0.172 -1.026 8
0.22 0.081 -0.781 7
0.139 -0.116 -0.559 10
-0.019 -0.325 -0.326 8
-0.273 -0.383 -0.022 9
-0.487 -0.474 0.056 8
-0.644 -0.543 -0.086 9
-0.579 -0.489 -0.078 8
-0.715 -0.412 -0.172 8
-0.641 -0.385 -0.384 9
-0.421 -0.373 -0.672 8
-0.183 -0.309 -0.773 8
0.028 -0.169 -0.731 9
0.025 -0.152 -0.658 7
0.208 -0.016 -0.554 10
0.299 0.212 -0.079 8
0.303 0.477 0.555 8
0.384 0.376 0.471 9
0.422 0.133 -0.081 8
0.128 0.25 -0.344 9
-0.157 0.432 -0.358 8
-0.142 0.389 -0.323 8
-0.129 0.352 -0.247 9
-0.038 0.342 -0.075 8
0.084 0.406 -0.366 9
0.201 0.395 -0.597 6
0.21 0.37 -0.14 10
0.119 0.428 0.184 9
0.107 0.385 0.166 8
-0.069 0.454 0.226 9
-0.11 0.4 0.462 8
0.114 0.08 0.783 8
0.354 -0.301 0.987 9
0.428 -0.531 1.081 8
0.385 -0.478 0.973 9
0.32 -0.581 0.875 8
0.211 -0.554 0.952 8
0.257 -0.506 0.933 7
0.49 -0.526 0.946 10
0.703 -0.596 0.838 8
0.809 -0.731 0.682 9
0.728 -0.658 0.613 8
0.725 -0.762 0.497 9
0.494 -0.704 0.416 8
0.12 -0.624 0.354 8
-0.186 -0.596 0.302 9
-0.407 -0.545 0.344 8
-0.554 -0.543 0.449 9
-0.499 -0.489 0.404 8
-0.521 -0.591 0.514 7
-0.433 -0.693 0.688 10
-0.304 -0.692 0.84 8
-0.194 -0.543 0.853 9
-0.121 -0.326 0.673 8
-0.099 -0.124 0.407 8
-0.089 -0.112 0.366 9
-0.154 0.048 0.17 8
-0.289 0.106 0.094 9
-0.462 0.083 0.198 8
-0.618 0.02 0.37 8
-0.737 -0.027 0.494 9
-0.663 -0.025 0.445 6
-0.665 -0.094 0.518 11
-0.474 -0.232 0.508 8
-0.27 -0.267 0.449 8
-0.176 -0.197 0.356 9
-0.139 -0.182 0.18 8
-0.151 -0.182 -0.023 8
-0.207 -0.154 -0.2 9
-0.186 -0.139 -0.18 8
-0.231 -0.12 -0.311 9
-0.205 -0.116 -0.35 8
-0.162 -0.096 -0.385 8
-0.064 -0.203 -0.218 7
-0.083 -0.252 0.128 10
-0.074 -0.227 0.115 9
-0.129 -0.176 0.103 8
-0.065 -0.2 0.01 8
-0.067 -0.131 -0.239 9
-0.059 -0.049 -0.497 8
-0.029 -0.009 -0.706 9
-0.008 0.007 -0.778 8
-0.007 0.006 -0.7 8
0.009 -0.043 -0.644 9
-0.014 -0.142 -0.447 8
-0.142 -0.23 -0.175 7
-0.299 -0.282 0.082 10
-0.375 -0.293 0.239 8
-0.383 -0.283 0.242 9
-0.345 -0.255 0.217 8
-0.297 -0.238 0.196 8
-0.167 -0.184 0.234 9
0.043 -0.102 0.205 8
0.234 -0.012 0.114 9
0.301 0.079 0.053 8
0.249 0.143 -0.053 8
0.224 0.129 -0.048 9
0.113 0.134 -0.258 7
-0.044 0.09 -0.439 10
-0.199 0.068 -0.471 8
-0.259 0.065 -0.389 8
-0.153 0.047 -0.282 9
0.079 0.053 -0.17 8
0.071 0.048 -0.153 9
0.275 0.073 0.025 8
0.384 0.086 0.359 8
0.451 0.079 0.678 9
0.481 0.022 0.783 8
0.444 -0.045 0.751 9
0.4 -0.04 0.676 6
0.31 -0.053 0.595 10
0.169 -0.034 0.425 9
0.023 -0.032 0.232 8
-0.072 -0.033 0.096 9
-0.097 -0.02 0.0 8
-0.025 0.004 -0.06 8
-0.022 0.004 -0.065 9
0.11 0.003 -0.058 8
0.224 0.031 -0.036 8
0.273 0.061 -0.066 9
0.249 0.112 -0.111 8
0.141 0.161 -0.15 7
-0.029 0.143 -0.196 10
-0.026 0.128 -0.176 8
-0.185 0.061 -0.189 9
-0.282 0.017 -0.195 8
-0.292 0.0 -0.196 9
-0.218 0.002 -0.153 8
-0.096 0.031 -0.155 8
-0.005 0.059 -0.202 9
-0.004 0.053 -0.182 8
-0.004 0.064 -0.133 9
-0.085 0.051 -0.018 8
-0.159 0.029 0.099 7
-0.148 0.005 0.222 10
-0.122 0.032 0.246 8
-0.064 0.071 0.234 9
-0.057 0.064 0.211 8
0.007 0.106 0.179 8
0.056 0.188 0.123 9
0.071 0.289 -0.023 8
-0.017 0.38 -0.259 9
-0.174 0.408 -0.372 8
-0.315 0.415 -0.411 8
-0.284 0.373 -0.37 9
-0.321 0.377 -0.437 6
-0.32 0.377 -0.57 10
-0.229 0.377 -0.615 9
-0.005 0.352 -0.498 8
0.173 0.324 -0.345 9
0.214 0.295 -0.217 8
0.192 0.266 -0.196 8
0.064 0.186 -0.224 9
-0.143 0.118 -0.252 8
-0.312 0.102 -0.061 9
-0.495 0.083 0.093 8
-0.688 0.03 0.26 8
-0.619 0.027 0.234 7
-0.779 0.037 0.335 10
-0.651 0.071 0.152 9
-0.246 0.065 -0.184 8
0.109 0.093 -0.545 8
0.283 0.115 -0.734 9
0.207 0.127 -0.667 8
0.187 0.114 -0.6 9
0.036 0.121 -0.398 8
0.019 0.116 -0.205 8
0.048 0.105 -0.041 9
-0.01 0.089 0.105 8
-0.142 0.063 0.252 7
-0.361 0.044 0.391 10
-0.325 0.039 0.352 8
-0.489 0.028 0.412 9
-0.444 0.024 0.337 8
-0.283 0.029 0.168 8
-0.131 0.038 -0.033 9
-0.05 0.046 -0.23 8
# end
#Thu Feb 26 20:31:32 GMT+08:00 2015.
