# Supplementary material for: Abnormal Gait Behavior Detection for Elderly Based on Enhanced Wigner-Ville Analysis and Cloud Incremental SVM Learning
Source: Hindawi journal article supplement (doi:10.1155/2016/5869238), 2016-01-01
Supplement: f1 [file 5869238.f1.zip › Supplementary Materials/Original Data/Forward fall With recovery/original__77.txt]

# Accelerometer Values
# filename:  original__77.txt
# Saving start time: Thu Feb 26 20:31:34 GMT+08:00 2015

# sensor resolution: 0.0095825195m/s^2
#Sensorvendor: KIONIX, name: KX023 Accelerometer, type: 1,version : 1, range 39.240005

# X value, Y value, Z value, time diff in ms
-0.148 -0.041 -0.156 9
-0.133 -0.062 0.026 8
-0.12 -0.056 0.024 8
0.202 -0.056 0.172 9
0.318 -0.016 0.24 8
0.378 0.042 0.258 9
0.39 0.086 0.216 8
0.376 0.103 0.119 8
0.338 0.093 0.107 7
0.307 0.097 0.021 10
0.259 0.097 -0.037 9
0.195 0.094 -0.065 8
0.113 0.088 -0.072 8
0.028 0.078 -0.08 9
0.002 0.06 -0.07 8
0.002 0.054 -0.063 9
0.07 0.036 -0.049 8
0.149 0.023 -0.024 8
0.183 0.01 0.033 9
0.187 -0.019 0.131 8
0.165 -0.086 0.234 7
0.085 -0.191 0.295 10
0.076 -0.172 0.265 8
-0.089 -0.258 0.304 9
-0.009 -0.374 0.346 8
0.333 -0.654 0.246 8
0.258 -0.625 0.026 9
-0.051 0.125 0.124 8
-0.308 0.715 0.291 9
-0.277 0.643 0.262 8
-0.334 0.51 0.21 8
-0.124 0.243 0.086 9
-0.035 0.099 -0.066 7
-0.036 0.024 -0.216 10
-0.085 0.044 -0.426 8
-0.239 0.141 -0.588 8
-0.215 0.127 -0.529 9
-0.245 0.167 -0.597 8
-0.161 -0.041 -0.696 9
-0.054 -0.42 -0.751 8
0.021 -0.611 -0.736 8
0.011 -0.525 -0.705 9
0.111 -0.335 -0.585 8
0.1 -0.301 -0.526 8
0.358 -0.097 -0.317 7
0.675 0.014 -0.172 10
0.88 0.0 -0.199 9
0.887 -0.096 -0.279 8
0.703 -0.21 -0.386 8
0.633 -0.315 -0.512 9
0.569 -0.283 -0.461 8
0.047 -0.37 -0.562 9
-0.071 -0.413 -0.587 8
-0.199 -0.461 -0.576 8
-0.308 -0.513 -0.682 9
-0.29 -0.5 -0.825 8
-0.261 -0.45 -0.742 7
-0.217 -0.357 -0.791 10
-0.15 -0.177 -0.765 8
-0.041 0.074 -0.707 9
0.101 0.287 -0.733 8
0.26 0.363 -0.91 9
0.354 0.36 -1.068 8
0.318 0.324 -0.961 8
0.25 0.22 -0.957 9
0.102 0.082 -0.885 8
0.004 0.03 -0.802 9
0.002 0.002 -0.761 8
0.147 -0.062 -0.797 7
0.37 -0.207 -0.811 10
0.333 -0.186 -0.73 8
0.523 -0.329 -0.681 8
0.627 -0.316 -0.616 9
0.66 -0.251 -0.725 8
0.592 -0.304 -1.161 9
0.289 -0.398 -1.557 8
-0.113 -0.579 -1.569 8
-0.101 -0.521 -1.412 9
-0.407 -0.81 -1.247 8
-0.662 -0.96 -1.075 9
-0.652 -0.953 -0.943 6
-0.272 -0.812 -0.856 10
0.305 -0.696 -0.87 9
0.916 -0.736 -0.93 8
0.825 -0.663 -0.837 9
1.309 -0.731 -0.633 8
1.526 -0.852 -0.073 8
1.397 -1.096 0.59 9
1.031 -1.532 1.054 8
0.435 -1.959 1.072 9
-0.463 -1.831 0.683 8
-0.416 -1.648 0.614 8
-0.881 -1.405 0.168 7
-0.415 -1.508 -0.076 10
0.544 -1.578 0.01 9
1.491 -1.579 0.346 8
1.891 -1.578 0.853 8
1.701 -1.42 0.767 9
1.385 -1.322 1.532 8
0.651 -1.275 2.095 8
-0.052 -1.247 2.163 9
-0.553 -1.04 1.805 8
-0.711 -0.787 1.13 9
-0.185 -0.485 0.42 8
-0.166 -0.437 0.378 7
0.806 -0.086 -0.172 10
1.62 0.163 -0.472 8
1.9 0.205 -0.538 9
1.554 0.095 -0.38 8
0.936 -0.129 -0.089 8
0.399 -0.343 0.432 9
0.359 -0.309 0.389 8
-0.185 -0.469 0.921 9
-0.71 -0.606 1.089 8
-0.781 -0.731 0.821 8
-0.215 -0.818 0.217 9
0.788 -0.835 -0.218 6
1.535 -0.92 -0.352 11
1.381 -0.828 -0.317 8
1.451 -1.04 -0.319 8
1.23 -1.369 -0.141 9
1.004 -1.752 0.577 8
1.029 -2.351 2.018 8
1.341 -2.964 3.531 9
2.516 -3.306 4.798 8
2.264 -2.976 4.318 9
4.354 -3.082 6.49 8
5.066 -3.029 8.8 8
3.649 -3.095 10.14 7
2.061 -3.654 12.216 10
1.436 -4.263 15.591 9
2.104 -4.956 18.455 8
1.893 -4.461 16.61 8
3.153 -4.316 16.694 9
3.437 -2.388 13.329 8
3.159 -0.865 8.238 9
2.242 0.129 3.794 8
0.347 1.07 1.186 8
-1.565 1.321 0.037 9
-1.409 1.189 0.034 8
-2.814 1.072 -0.181 7
-3.47 0.803 -0.136 10
-3.475 0.608 -0.408 8
-3.086 0.679 -1.489 9
-2.585 1.226 -3.059 8
-2.327 1.103 -2.753 8
-1.464 1.132 -4.652 9
-0.72 1.063 -6.458 8
-0.702 1.7 -7.363 9
-0.791 1.771 -7.364 8
-0.934 1.741 -6.48 8
-1.074 1.87 -5.094 9
-0.967 1.683 -4.585 7
-0.896 1.64 -3.391 10
-0.728 1.638 -2.61 8
-0.634 1.693 -2.455 8
-0.587 1.845 -2.691 9
-0.47 1.883 -2.985 8
-0.343 1.784 -3.191 9
-0.309 1.606 -2.872 8
-0.332 1.576 -3.057 8
-0.442 1.486 -3.219 9
-0.545 1.288 -3.159 8
-0.549 1.024 -2.933 9
-0.4 0.838 -2.555 6
-0.195 0.778 -2.037 10
-0.176 0.7 -1.833 9
-0.005 0.68 -1.429 8
0.137 0.71 -1.116 9
0.307 0.725 -0.761 8
0.418 0.707 -0.415 8
0.408 0.684 -0.262 9
0.318 0.645 -0.336 8
0.286 0.581 -0.302 9
0.195 0.494 -0.473 8
0.271 0.298 -0.576 8
0.411 0.055 -0.58 7
0.34 -0.148 -0.523 10
0.129 -0.32 -0.419 8
-0.046 -0.415 -0.351 9
-0.041 -0.374 -0.316 8
-0.033 -0.365 -0.326 9
0.21 -0.269 -0.448 8
0.442 -0.125 -0.796 8
0.538 -0.016 -1.208 9
0.561 -0.028 -1.278 8
0.504 -0.025 -1.15 9
0.464 -0.18 -1.035 8
0.251 -0.414 -0.503 7
-0.145 -0.612 -0.097 10
-0.551 -0.699 0.107 8
-0.818 -0.681 0.178 9
-0.907 -0.583 0.105 8
-0.816 -0.524 0.095 8
-0.826 -0.388 -0.136 9
-0.79 -0.263 -0.409 8
-0.672 -0.182 -0.616 9
-0.484 -0.167 -0.75 8
-0.194 -0.268 -0.677 8
0.139 -0.393 -0.331 9
0.125 -0.354 -0.298 6
0.258 -0.435 0.081 11
0.117 -0.468 0.368 8
-0.104 -0.474 0.655 8
-0.211 -0.508 1.023 9
-0.112 -0.544 1.433 8
0.14 -0.554 1.702 8
0.126 -0.498 1.531 9
0.414 -0.48 1.49 8
0.637 -0.408 1.168 9
0.718 -0.239 0.68 8
0.653 -0.016 0.168 8
0.61 0.177 -0.098 7
0.729 0.274 0.22 10
0.656 0.247 0.198 9
0.793 0.192 1.007 8
0.899 -0.018 1.93 8
0.998 -0.261 2.764 9
1.036 -0.453 3.358 8
1.11 -0.627 3.73 9
1.333 -0.749 3.931 8
1.2 -0.674 3.538 8
1.447 -0.745 3.578 9
1.524 -0.774 3.491 8
1.311 -0.594 3.449 7
1.081 -0.608 3.568 10
1.242 -0.869 3.886 8
1.577 -0.835 4.338 9
1.419 -0.751 3.904 8
1.648 -0.636 4.094 8
1.723 -0.592 3.689 9
1.586 -0.577 3.029 8
1.267 -0.586 2.426 9
1.088 -0.566 1.88 8
0.979 -0.509 1.692 8
0.882 -0.46 1.523 9
0.528 -0.373 0.51 7
-0.06 -0.238 -0.371 10
-0.708 -0.069 -1.416 8
-1.361 0.193 -2.466 8
-2.035 0.51 -3.423 9
-1.831 0.459 -3.08 8
-2.414 0.73 -3.856 9
-2.754 0.845 -4.2 8
-2.793 0.788 -4.058 8
-2.48 0.655 -3.714 9
-1.964 0.525 -3.441 8
-1.426 0.478 -3.383 9
-1.283 0.43 -3.045 6
-0.914 0.526 -3.142 10
-0.887 0.678 -3.268 9
-1.178 0.749 -3.165 8
-1.701 0.701 -2.677 8
-2.281 0.587 -1.926 9
-2.603 0.461 -0.977 8
-2.343 0.415 -0.879 9
-2.135 0.305 0.099 8
-1.31 0.308 0.863 8
-0.345 0.472 1.228 9
0.151 0.742 1.062 8
0.02 1.041 0.39 7
-0.513 1.252 -0.398 10
-0.462 1.127 -0.358 8
-0.99 1.208 -1.051 9
-1.242 1.187 -1.608 8
-1.144 1.134 -2.15 9
-0.833 1.097 -2.702 8
-0.568 1.104 -3.09 8
-0.438 1.094 -3.353 9
-0.394 0.984 -3.018 8
-0.346 0.958 -3.173 9
-0.351 0.972 -3.13 8
-0.424 0.993 -3.003 7
-0.418 1.004 -2.972 10
-0.266 0.911 -3.067 8
-0.196 0.86 -3.198 9
-0.177 0.774 -2.878 8
-0.229 0.823 -3.086 8
-0.323 0.778 -3.432 9
-0.434 0.557 -3.684 8
-0.423 0.187 -3.546 8
-0.439 -0.026 -2.856 9
-0.395 -0.023 -2.57 8
-0.557 -0.041 -1.565 9
-0.691 -0.108 -0.654 6
-0.684 -0.19 0.083 10
-0.594 -0.188 0.587 9
-0.549 -0.123 0.695 8
-0.555 0.067 0.371 9
-0.5 0.061 0.334 8
-0.486 0.286 -0.186 8
-0.443 0.442 -0.646 9
-0.419 0.519 -0.986 8
-0.379 0.317 -1.397 9
-0.355 0.27 -1.85 8
-0.398 0.463 -2.072 8
-0.358 0.417 -1.865 7
-0.428 0.352 -1.849 10
-0.452 0.255 -1.49 9
-0.398 0.315 -0.796 8
-0.382 0.416 0.042 8
-0.36 0.454 0.788 9
-0.237 0.441 1.203 8
-0.213 0.396 1.082 9
-0.068 0.376 1.215 8
-0.026 0.393 1.067 8
-0.139 0.504 0.611 9
-0.341 0.658 -0.039 8
-0.487 0.712 -0.606 7
-0.514 0.754 -0.787 10
-0.463 0.678 -0.709 8
-0.45 0.836 -0.507 9
-0.307 0.917 -0.175 8
-0.164 0.772 0.071 8
-0.319 0.858 0.168 9
-0.335 1.106 0.516 8
-0.035 0.801 1.149 9
-0.031 0.721 1.034 8
-0.048 0.606 1.421 8
-0.246 0.874 1.455 9
-0.252 0.85 1.206 6
-0.228 0.74 0.905 11
-0.239 0.734 0.735 8
-0.215 0.661 0.611 8
-0.197 0.594 0.55 9
-0.07 1.011 0.451 8
0.164 1.109 0.455 9
0.3 1.086 0.472 8
0.345 0.907 0.382 8
0.278 0.652 0.169 9
0.25 0.587 0.152 8
0.012 0.507 -0.435 9
-0.168 0.45 -1.286 6
-0.285 0.394 -1.43 10
-0.602 0.518 0.417 9
-0.921 0.694 2.058 8
-1.052 0.666 1.645 8
-0.947 0.6 1.481 9
-1.003 0.685 0.87 8
-0.529 0.585 0.992 9
0.269 0.207 1.37 8
0.819 0.039 1.403 8
1.131 -0.031 1.329 9
1.188 -0.068 1.277 8
1.069 -0.061 1.149 7
0.913 -0.017 0.955 10
0.695 0.066 0.568 8
0.523 0.219 0.103 9
0.428 0.449 -0.242 8
0.385 0.674 -0.426 9
0.381 0.799 -0.459 8
0.343 0.719 -0.413 8
0.416 0.72 -0.475 9
0.572 0.673 -0.565 8
0.731 0.583 -0.4 8
0.88 0.474 0.009 9
0.967 0.462 0.482 7
0.941 0.472 0.853 10
0.846 0.425 0.768 8
0.765 0.333 0.965 8
0.622 0.252 1.111 9
0.478 0.228 1.253 8
0.445 0.176 1.195 9
0.491 0.111 0.946 8
0.442 0.047 0.6 8
0.397 0.042 0.54 9
0.503 0.029 0.18 8
0.453 0.056 -0.037 9
0.327 0.098 -0.169 6
0.204 0.064 -0.267 10
0.069 0.064 -0.269 9
0.062 0.057 -0.242 8
-0.081 0.144 -0.196 9
-0.098 0.181 -0.089 8
0.032 0.191 0.002 8
0.193 0.186 -0.024 9
0.263 0.181 -0.091 8
0.266 0.179 -0.173 9
0.239 0.161 -0.156 8
0.182 0.152 -0.267 8
0.015 0.135 -0.374 7
-0.225 0.101 -0.49 10
-0.448 0.072 -0.552 9
-0.589 0.073 -0.58 8
-0.637 0.083 -0.655 8
-0.573 0.075 -0.589 9
-0.558 0.087 -0.66 8
-0.479 0.095 -0.655 8
-0.368 0.089 -0.591 9
-0.26 0.074 -0.471 8
-0.181 0.064 -0.338 9
-0.169 0.055 -0.219 8
-0.152 0.05 -0.197 7
-0.218 0.043 -0.104 10
-0.302 -0.034 -0.179 8
-0.41 -0.159 -0.174 9
-0.571 -0.217 -0.054 8
-0.696 -0.267 -0.168 8
-0.684 -0.291 -0.4 9
-0.616 -0.262 -0.36 8
-0.415 -0.199 -0.575 9
-0.12 -0.111 -0.793 8
0.117 -0.038 -0.859 8
0.211 -0.014 -0.644 9
0.19 -0.013 -0.58 6
0.051 -0.053 0.312 11
0.046 -0.048 0.281 8
-0.046 -0.042 0.573 8
-0.117 0.003 0.652 9
-0.157 0.072 0.542 8
-0.193 0.131 0.347 8
-0.253 0.166 0.118 9
-0.228 0.149 0.106 8
-0.276 0.185 -0.187 9
-0.255 0.221 -0.484 8
-0.181 0.291 -0.639 8
-0.108 0.386 -0.589 7
-0.055 0.375 -0.273 10
-0.015 0.236 0.249 9
-0.013 0.212 0.224 8
-0.028 0.06 0.783 8
-0.12 -0.065 1.233 9
-0.19 -0.15 1.466 8
-0.171 -0.177 1.452 9
-0.065 -0.17 1.142 8
0.067 -0.14 0.669 8
0.061 -0.126 0.602 9
0.136 -0.075 0.123 8
0.14 -0.049 -0.331 7
0.035 -0.063 -0.538 10
-0.149 -0.125 -0.514 8
-0.364 -0.267 -0.349 9
-0.485 -0.452 -0.1 8
-0.436 -0.407 -0.09 8
-0.492 -0.413 0.057 9
-0.546 -0.194 0.116 8
-0.436 -0.093 0.191 9
-0.208 -0.144 0.289 8
-0.02 -0.155 0.289 8
0.083 -0.087 0.17 9
0.075 -0.078 0.153 7
0.092 0.007 0.019 10
0.019 0.087 -0.097 8
-0.137 0.157 -0.275 8
-0.398 0.213 -0.435 9
-0.728 0.244 -0.331 8
-0.931 0.145 -0.038 9
-0.838 0.131 -0.034 8
-0.755 -0.06 0.232 8
-0.508 -0.214 0.433 9
-0.214 -0.322 0.537 8
0.171 -0.344 0.538 9
0.154 -0.31 0.484 6
0.495 -0.244 0.301 10
0.612 -0.22 0.271 9
0.476 0.011 0.211 8
0.18 0.084 0.181 9
-0.107 0.066 0.147 8
-0.303 0.056 0.092 8
-0.358 0.047 0.078 9
-0.322 0.043 0.071 8
-0.317 0.023 0.036 8
-0.292 0.058 -0.117 9
-0.189 0.113 -0.322 8
0.048 0.167 -0.476 7
0.364 0.22 -0.511 10
0.541 0.245 -0.461 8
0.487 0.22 -0.415 9
0.456 0.219 -0.362 8
0.307 0.209 -0.225 9
0.097 0.19 0.002 8
-0.141 0.158 0.151 8
-0.316 0.108 0.155 9
-0.358 0.053 0.083 8
-0.322 0.047 0.075 9
-0.281 0.013 -0.039 8
-0.251 0.026 -0.169 7
-0.216 0.076 -0.203 10
-0.17 0.102 -0.103 8
-0.129 0.107 0.052 9
-0.061 0.105 0.191 8
-0.055 0.094 0.172 8
0.0 0.076 0.285 9
-0.013 0.052 0.337 8
-0.054 0.046 0.309 9
-0.103 0.054 0.208 8
-0.166 0.063 0.06 8
-0.217 0.057 -0.139 9
-0.195 0.052 -0.125 6
-0.164 0.041 -0.243 10
-0.123 0.05 -0.195 9
-0.223 0.091 -0.153 8
-0.339 0.146 -0.248 9
-0.329 0.171 -0.44 8
-0.237 0.158 -0.61 8
-0.213 0.142 -0.549 9
-0.127 0.148 -0.676 8
-0.121 0.195 -0.729 9
-0.163 0.208 -0.718 8
-0.182 0.172 -0.68 8
-0.163 0.155 -0.612 7
-0.132 0.114 -0.555 10
-0.057 0.089 -0.469 9
0.02 0.052 -0.375 8
0.018 -0.013 -0.208 8
-0.082 -0.063 0.053 9
-0.138 -0.084 0.247 8
-0.1 -0.097 0.324 9
-0.09 -0.087 0.292 8
-0.023 -0.087 0.28 8
0.08 -0.084 0.186 9
0.18 -0.082 0.051 8
0.252 -0.076 -0.081 7
0.275 -0.072 -0.17 10
# end
#Thu Feb 26 20:31:38 GMT+08:00 20152
