# Supplementary material for: Abnormal Gait Behavior Detection for Elderly Based on Enhanced Wigner-Ville Analysis and Cloud Incremental SVM Learning
Source: Hindawi journal article supplement (doi:10.1155/2016/5869238), 2016-01-01
Supplement: f1 [file 5869238.f1.zip › Supplementary Materials/Original Data/Forward fall With recovery/original__78.txt]

# Accelerometer Values
# filename:  original__78.txt
# Saving start time: Thu Feb 26 20:31:40 GMT+08:00 2015

# sensor resolution: 0.0095825195m/s^2
#Sensorvendor: KIONIX, name: KX023 Accelerometer, type: 1,version : 1, range 39.240005

# X value, Y value, Z value, time diff in ms
0.014 0.128 -0.533 8
0.012 0.115 -0.48 9
0.052 0.063 -0.414 8
0.15 0.014 -0.314 8
0.298 -0.004 -0.222 9
0.388 -0.002 -0.15 8
0.352 -0.003 -0.107 9
0.317 -0.003 -0.097 6
0.204 0.006 -0.08 10
0.342 -0.063 -0.05 9
0.532 -0.255 -0.125 8
0.286 -0.152 -0.249 9
-0.144 0.172 -0.218 8
-0.334 0.214 -0.117 8
-0.265 0.007 -0.069 9
-0.238 0.006 -0.062 8
-0.062 -0.086 -0.049 9
0.169 -0.007 -0.016 8
0.276 -0.039 -0.043 8
0.337 -0.157 -0.067 7
0.307 -0.236 -0.044 10
0.276 -0.213 -0.039 8
0.073 -0.201 -0.017 9
-0.03 -0.128 0.036 8
0.039 -0.045 0.038 9
0.195 0.024 -0.112 8
0.348 0.061 -0.262 8
0.391 0.062 -0.189 9
0.352 0.056 -0.17 8
0.249 0.0 0.04 9
0.106 -0.158 0.205 8
0.008 -0.328 0.248 7
0.014 -0.396 0.017 10
0.114 -0.398 -0.545 8
0.237 -0.355 -1.198 9
0.213 -0.32 -1.078 8
0.332 -0.161 -1.491 8
0.415 0.126 -1.52 9
0.452 0.341 -1.264 8
0.442 0.348 -0.877 9
0.377 0.228 -0.542 8
0.288 0.109 -0.35 8
0.259 0.098 -0.315 9
0.185 0.047 -0.241 6
0.117 0.015 -0.217 10
0.037 0.069 -0.253 9
0.012 0.293 -0.289 8
0.067 0.476 -0.47 9
0.084 0.589 -0.792 8
0.075 0.53 -0.713 8
-0.008 0.776 -0.899 9
-0.158 1.007 -0.958 8
-0.12 0.842 -0.899 9
0.053 0.485 -0.666 8
0.204 0.245 -0.246 8
0.184 0.221 -0.221 7
0.339 0.084 0.255 10
0.492 0.102 0.611 9
0.678 0.271 0.759 8
0.778 0.395 0.595 8
0.792 0.429 0.129 9
0.681 0.477 -0.426 8
0.613 0.43 -0.384 9
0.324 0.342 -0.855 8
0.024 0.117 -1.157 8
-0.218 -0.083 -1.263 9
-0.442 -0.297 -1.23 8
-0.434 -0.546 -1.039 7
-0.065 -0.745 -0.727 10
-0.059 -0.67 -0.654 8
0.365 -0.76 -0.395 9
0.546 -0.676 -0.329 8
0.672 -0.633 -0.523 8
0.714 -0.698 -0.696 9
0.559 -0.698 -0.764 8
0.366 -0.703 -1.026 9
0.329 -0.633 -0.923 8
0.088 -0.755 -1.337 8
-0.207 -0.975 -1.639 9
-0.545 -1.128 -1.767 7
-0.789 -1.301 -1.789 10
-0.853 -1.609 -1.754 8
-0.654 -1.84 -1.691 8
-0.588 -1.656 -1.522 9
-0.107 -1.771 -1.291 8
0.373 -1.906 -0.855 9
0.68 -2.075 -0.369 8
0.726 -2.118 0.029 8
0.448 -2.107 0.175 9
0.063 -2.094 0.178 8
0.057 -1.884 0.16 9
-0.248 -1.815 0.034 6
-0.431 -1.786 -0.209 10
-0.468 -1.762 -0.378 9
-0.316 -1.664 -0.477 8
0.239 -1.492 -0.573 8
1.068 -1.204 -0.594 9
0.961 -1.083 -0.535 8
1.467 -0.779 -0.469 9
1.275 -0.58 -0.365 8
0.492 -0.441 -0.086 8
-0.469 -0.329 0.466 9
-1.14 -0.277 0.938 8
-1.026 -0.249 0.844 7
-1.259 -0.3 1.059 10
-1.113 -0.314 1.232 8
-0.626 0.037 1.373 9
0.637 0.325 1.575 8
2.416 0.307 2.034 9
3.572 0.422 2.804 8
3.215 0.38 2.524 8
3.465 0.427 3.394 9
3.149 0.134 4.13 8
2.762 -0.4 4.802 9
2.474 -0.945 5.443 8
2.148 -1.228 5.985 7
1.831 -1.266 6.04 10
1.648 -1.139 5.436 8
1.6 -0.965 4.826 9
1.981 -0.526 4.141 8
2.676 -0.383 3.562 8
2.739 -0.023 2.62 9
2.117 0.593 1.394 8
1.605 0.608 0.542 8
1.444 0.547 0.488 9
1.186 0.275 0.833 8
1.374 -0.244 2.308 9
1.744 -0.862 4.263 6
1.749 -1.195 5.787 10
1.455 -1.302 6.028 9
1.294 -1.101 4.975 8
1.165 -0.991 4.478 9
0.902 -0.08 2.943 8
0.767 0.673 1.609 8
1.157 0.646 0.686 9
1.585 0.618 0.361 8
2.184 0.56 0.909 9
1.966 0.223 2.201 8
1.769 0.201 1.981 8
3.348 -0.066 3.328 7
3.047 -0.052 3.863 10
2.087 0.148 3.241 9
0.583 0.379 1.711 8
-1.084 0.573 0.026 8
-0.975 0.515 0.024 9
-2.359 0.499 -0.958 8
-3.201 0.087 -0.933 8
-3.183 -0.595 -0.182 9
-2.558 -1.155 0.689 8
-1.82 -1.267 1.169 9
-1.066 -0.992 0.975 8
-0.96 -0.893 0.877 7
-0.381 -0.511 -0.127 10
-0.201 -0.174 -1.755 8
-0.551 0.157 -3.393 9
-1.217 0.285 -4.553 8
-1.782 -0.122 -5.16 8
-2.535 -0.499 -5.354 9
-2.281 -0.449 -4.818 8
-3.261 -0.641 -4.652 9
-3.874 -1.0 -3.665 8
-3.953 -1.36 -1.925 8
-3.536 -1.456 -0.314 9
-2.823 -1.149 0.271 7
-2.086 -0.529 -0.338 10
-1.877 -0.476 -0.304 8
-1.473 0.574 -1.691 8
-0.368 1.401 -4.255 9
1.172 1.481 -2.929 8
1.483 1.562 2.824 9
0.624 1.252 6.113 8
-0.853 0.4 5.511 8
-0.768 0.36 4.96 9
-2.141 -0.192 2.09 8
-2.651 -0.49 -0.979 8
-2.176 -0.824 -3.113 7
-1.303 -1.166 -4.21 10
-0.377 -1.399 -4.534 9
-0.34 -1.259 -4.081 8
0.611 -0.672 -3.717 8
1.466 1.032 -2.65 9
1.895 2.582 -1.42 8
1.587 3.022 -0.898 9
0.562 2.495 -1.322 8
-0.778 1.555 -2.18 8
-0.7 1.399 -1.962 9
-1.87 0.602 -2.453 8
-2.517 0.0 -2.0 7
-2.768 -0.794 -0.978 10
-2.76 -1.553 0.105 8
-2.415 -1.726 1.09 9
-1.98 -1.511 1.689 8
-1.782 -1.36 1.52 9
-1.327 -1.074 1.672 8
-0.85 -0.651 1.543 8
-0.361 -0.208 1.273 9
0.084 0.155 0.859 8
0.233 0.517 0.289 8
0.089 0.828 -0.366 9
0.08 0.745 -0.33 7
-0.182 0.884 -1.059 10
-0.524 0.827 -1.69 8
-0.858 0.691 -1.949 8
-1.096 0.541 -1.639 9
-1.164 0.289 -0.844 8
-1.047 -0.044 0.08 9
-0.943 -0.04 0.072 8
-0.696 -0.312 0.898 8
-0.332 -0.448 1.341 9
0.053 -0.456 1.178 8
0.398 -0.325 0.549 9
0.358 -0.293 0.494 6
0.613 -0.089 -0.292 10
0.799 0.067 -0.977 9
0.924 0.144 -1.296 8
0.952 0.147 -1.156 9
0.884 0.079 -0.705 8
0.799 -0.069 -0.208 8
0.742 -0.226 0.19 9
0.667 -0.203 0.171 8
0.551 -0.237 0.334 9
0.412 -0.133 0.154 8
0.256 -0.041 -0.275 8
0.09 -0.077 -0.626 7
0.033 -0.207 -0.534 10
0.108 -0.416 -0.007 8
0.098 -0.374 -0.006 9
0.236 -0.576 0.85 8
0.346 -0.679 1.809 9
0.494 -0.752 2.671 8
0.738 -0.769 3.298 8
0.957 -0.71 3.556 9
1.06 -0.684 3.587 8
0.954 -0.615 3.228 9
0.919 -0.676 3.274 8
0.707 -0.821 3.224 7
0.411 -0.993 2.907 10
0.245 -1.046 2.352 8
0.248 -0.893 1.537 9
0.315 -0.606 0.469 8
0.284 -0.546 0.422 8
0.478 -0.301 -0.474 9
0.685 -0.13 -1.037 8
0.719 -0.021 -1.428 9
0.549 -0.001 -1.72 8
0.176 -0.022 -1.952 8
-0.249 -0.026 -2.063 9
-0.224 -0.024 -1.857 6
-0.498 -0.044 -1.772 11
-0.503 -0.107 -1.27 8
-0.177 -0.292 -0.496 8
0.327 -0.574 0.252 9
0.719 -0.743 0.675 8
0.647 -0.668 0.607 8
0.841 -0.693 0.514 9
0.798 -0.523 0.021 8
0.582 -0.195 -0.744 9
0.343 0.073 -1.613 8
0.248 0.178 -2.139 8
0.223 0.16 -1.925 7
0.244 0.149 -1.654 10
0.21 -0.024 -0.7 9
0.112 -0.364 0.505 8
-0.238 -0.266 1.492 8
-0.133 -0.434 1.893 9
0.775 -0.939 1.876 8
1.685 -0.776 1.692 9
1.517 -0.698 1.522 8
2.142 -0.121 1.059 8
2.364 0.359 0.486 9
2.115 0.34 0.305 8
1.23 0.041 0.639 7
0.107 -0.354 1.168 10
-0.849 -0.548 1.47 8
-0.764 -0.493 1.323 9
-1.302 -0.199 1.642 8
-0.864 0.329 1.899 8
0.189 1.03 1.646 9
1.275 1.398 0.526 8
1.713 1.714 -1.38 9
1.249 2.267 -3.421 8
1.124 2.041 -3.079 8
0.132 2.341 -4.675 9
-1.059 2.553 -5.441 7
-1.971 2.749 -5.623 10
-2.512 2.864 -5.428 8
-2.713 2.839 -4.953 8
-2.474 2.664 -4.34 9
-2.227 2.398 -3.906 8
-1.669 2.317 -3.038 9
-1.248 2.276 -1.888 8
-0.962 1.973 -0.633 8
-0.545 1.459 0.707 9
-0.377 0.914 1.904 8
-0.666 0.518 2.681 9
-0.599 0.466 2.413 6
-0.977 0.288 2.731 10
-1.173 0.164 2.483 9
-1.143 0.065 1.711 8
-0.788 0.068 0.785 9
-0.126 0.182 -0.082 8
-0.113 0.164 -0.074 8
0.508 0.381 -0.77 9
0.802 0.572 -1.144 8
0.819 0.592 -1.181 8
0.718 0.41 -0.94 9
0.595 0.133 -0.435 8
0.536 0.119 -0.392 7
0.431 -0.097 0.248 10
0.412 -0.236 0.719 8
0.287 -0.486 1.086 9
0.279 -0.45 1.443 8
0.453 0.0 1.457 9
0.464 0.147 0.755 8
0.454 0.089 -0.477 8
0.408 0.08 -0.43 9
0.419 0.177 -1.514 8
0.407 0.325 -1.979 9
0.286 0.323 -1.732 8
-0.126 0.04 -0.988 7
-0.693 -0.41 -0.072 10
-0.763 -0.52 1.011 8
-0.687 -0.468 0.91 9
-0.241 -0.557 1.666 8
0.094 -0.504 1.489 8
0.078 -0.177 0.876 9
-0.194 -0.189 0.203 8
-0.615 -0.201 -0.299 9
-1.012 -0.178 -0.556 8
-0.91 -0.16 -0.5 8
-1.163 -0.274 -0.806 9
-1.218 -0.467 -0.912 6
-1.07 -0.641 -0.679 10
-0.73 -0.732 -0.386 9
-0.374 -0.772 -0.329 8
-0.132 -1.02 -0.467 9
-0.119 -0.918 -0.421 8
-0.174 -1.09 -0.616 8
-0.614 -0.852 -0.955 9
-1.075 -0.647 -1.219 8
-1.375 -0.512 -1.222 9
-1.556 -0.325 -0.887 8
-1.612 -0.19 -0.37 8
-1.45 -0.171 -0.333 7
-1.233 -0.112 -0.162 10
-0.719 -0.079 -0.431 9
-0.21 -0.042 -0.889 8
0.025 0.123 -1.314 8
-0.066 0.44 -1.541 9
-0.059 0.396 -1.387 8
-0.357 0.638 -1.534 9
-0.703 0.725 -1.574 8
-0.959 0.708 -1.396 8
-0.682 0.355 -1.025 9
-0.471 0.193 -0.618 8
-0.424 0.174 -0.556 7
-0.598 0.377 -0.305 10
-0.517 0.32 -0.324 8
-0.39 0.258 -0.23 9
-0.437 0.354 0.213 8
-0.562 0.438 0.56 8
-0.666 0.45 0.586 9
-0.576 0.351 0.396 8
-0.519 0.316 0.356 9
-0.258 0.108 0.148 8
-0.002 -0.08 -0.005 8
0.217 -0.07 -0.085 9
0.409 0.033 -0.035 7
0.615 0.073 0.151 10
0.763 0.052 0.267 8
0.686 0.046 0.24 8
0.739 -0.027 0.22 9
0.676 -0.071 0.265 8
0.468 -0.013 0.315 9
0.159 0.114 0.186 8
-0.117 0.219 -0.152 8
-0.277 0.258 -0.537 9
-0.249 0.232 -0.483 8
-0.323 0.246 -0.715 9
-0.343 0.286 -0.792 6
-0.33 0.388 -0.756 10
-0.26 0.49 -0.549 9
-0.1 0.521 -0.283 8
0.071 0.545 -0.019 8
0.064 0.491 -0.017 9
0.148 0.599 0.234 8
0.165 0.71 0.307 9
0.213 0.793 0.204 8
0.329 0.847 0.063 8
0.316 0.845 -0.084 9
0.145 0.835 -0.317 8
0.131 0.752 -0.285 7
-0.033 0.761 -0.498 10
-0.182 0.799 -0.561 8
-0.287 0.868 -0.489 9
-0.328 0.918 -0.225 8
-0.155 0.752 0.124 9
-0.139 0.677 0.111 8
0.377 0.233 0.249 8
0.764 0.144 0.159 9
0.74 0.608 0.153 8
0.547 1.192 0.257 9
0.274 1.696 0.305 8
0.246 1.527 0.274 7
-0.097 1.921 0.274 10
-0.457 2.027 0.232 8
-0.482 1.487 0.131 8
-0.33 0.87 -0.021 9
-0.274 0.685 -0.163 8
-0.144 0.665 -0.312 9
0.051 0.725 -0.46 8
0.046 0.653 -0.414 8
0.294 0.718 -0.457 9
0.594 0.791 -0.434 8
0.911 0.933 -0.402 9
1.101 1.06 -0.286 6
1.066 1.054 -0.197 10
0.799 0.864 0.001 9
0.719 0.778 0.001 8
0.239 0.506 0.381 9
-0.305 0.288 0.645 8
-0.691 0.123 0.73 8
-0.838 0.044 0.676 9
-0.793 0.04 0.519 8
-0.528 0.053 0.37 9
-0.475 0.048 0.333 8
-0.029 0.066 0.318 8
0.455 0.081 0.44 7
0.841 0.081 0.649 10
0.954 0.063 0.87 8
0.814 0.029 0.994 9
0.589 -0.067 0.969 8
0.53 -0.06 0.872 9
0.328 -0.224 0.743 8
0.182 -0.341 0.611 8
0.073 -0.357 0.381 9
-0.014 -0.346 -0.049 8
-0.063 -0.309 -0.591 9
-0.057 -0.278 -1.027 8
-0.079 -0.251 -0.924 7
-0.048 -0.102 -1.129 10
-0.028 0.057 -1.134 8
-0.016 0.261 -0.973 9
0.065 0.326 -0.757 8
0.112 0.3 -0.389 8
0.101 0.27 -0.35 9
0.064 0.239 0.159 8
-0.01 0.184 0.527 9
-0.099 0.129 0.604 8
-0.159 0.059 0.448 8
-0.176 -0.009 0.238 9
-0.158 -0.008 0.214 6
-0.149 -0.025 0.022 11
-0.126 0.001 -0.254 8
-0.063 -0.021 -0.518 8
-0.046 -0.02 -0.659 9
-0.129 -0.003 -0.606 8
-0.226 -0.067 -0.333 9
-0.288 -0.152 -0.013 8
-0.259 -0.137 -0.012 8
-0.193 -0.214 0.204 9
0.007 -0.271 0.229 8
0.178 -0.328 0.117 8
0.185 -0.284 0.054 7
0.059 -0.165 0.144 10
-0.122 -0.121 0.328 9
-0.11 -0.108 0.296 8
-0.298 -0.157 0.492 8
-0.464 -0.29 0.738 9
-0.586 -0.447 0.971 8
-0.637 -0.551 1.025 9
-0.601 -0.582 0.958 8
-0.513 -0.538 0.851 8
-0.462 -0.484 0.766 9
-0.297 -0.411 0.523 8
-0.063 -0.285 0.175 7
0.116 -0.129 -0.083 10
0.167 -0.019 -0.193 8
0.078 0.011 -0.16 9
-0.122 -0.048 -0.033 8
-0.109 -0.043 -0.029 9
-0.314 -0.143 0.151 8
-0.414 -0.225 0.328 8
-0.434 -0.276 0.345 9
-0.414 -0.287 0.23 8
-0.374 -0.267 0.1 8
-0.336 -0.24 -0.008 9
-0.281 -0.216 -0.008 7
-0.154 -0.187 0.002 10
0.005 -0.137 -0.043 8
0.115 -0.09 -0.192 8
0.145 -0.024 -0.238 9
0.065 0.055 -0.266 8
0.058 0.05 -0.239 9
-0.078 0.127 -0.304 8
-0.193 0.211 -0.28 8
-0.272 0.219 -0.175 9
-0.373 0.117 -0.087 8
-0.486 -0.009 -0.022 9
-0.438 -0.008 -0.02 6
-0.424 -0.094 0.035 10
-0.284 -0.114 0.087 9
-0.155 -0.083 0.079 8
-0.069 0.01 0.002 9
0.0 0.093 0.101 8
-0.077 0.127 0.219 8
-0.333 0.167 0.135 9
-0.299 0.15 0.122 8
-0.517 0.209 -0.003 9
-0.444 0.195 -0.138 8
-0.183 0.111 -0.243 8
-0.007 0.057 -0.247 7
0.078 -0.017 -0.136 10
0.108 -0.108 0.11 9
0.097 -0.097 0.099 8
0.099 -0.138 0.405 8
0.101 -0.17 0.598 9
0.092 -0.209 0.662 8
0.023 -0.21 0.643 8
-0.1 -0.19 0.465 9
-0.213 -0.18 0.194 8
-0.191 -0.162 0.175 9
-0.268 -0.159 -0.023 8
-0.285 -0.152 -0.143 7
# end
#Thu Feb 26 20:31:45 GMT+08:00 20150
