# Supplementary material for: Abnormal Gait Behavior Detection for Elderly Based on Enhanced Wigner-Ville Analysis and Cloud Incremental SVM Learning
Source: Hindawi journal article supplement (doi:10.1155/2016/5869238), 2016-01-01
Supplement: f1 [file 5869238.f1.zip › Supplementary Materials/Original Data/Forward fall With recovery/original__80.txt]

# Accelerometer Values
# filename:  original__80.txt
# Saving start time: Thu Feb 26 20:31:58 GMT+08:00 2015

# sensor resolution: 0.0095825195m/s^2
#Sensorvendor: KIONIX, name: KX023 Accelerometer, type: 1,version : 1, range 39.240005

# X value, Y value, Z value, time diff in ms
-0.088 -0.165 0.104 9
0.05 -0.18 0.208 8
0.217 -0.15 0.275 8
0.34 -0.129 0.274 9
0.306 -0.116 0.247 8
0.39 -0.082 0.238 9
0.433 -0.021 0.237 8
0.418 0.064 0.231 7
0.415 0.155 0.234 10
0.404 0.201 0.219 8
0.306 0.114 0.1 9
0.276 0.103 0.09 8
0.161 -0.015 -0.077 8
0.076 -0.014 -0.161 9
0.036 0.059 -0.173 8
0.055 0.099 -0.181 9
0.127 0.095 -0.198 8
0.232 0.109 -0.208 8
0.208 0.098 -0.187 9
0.303 0.125 -0.162 6
0.312 0.136 -0.094 11
0.262 0.125 -0.039 8
0.208 0.073 -0.029 8
0.153 0.066 0.023 9
0.124 0.111 0.041 8
0.111 0.1 0.037 8
0.349 0.045 -0.028 9
0.528 -0.067 -0.092 8
0.333 -0.037 -0.175 9
0.15 0.038 -0.117 8
0.104 0.015 0.156 8
0.093 0.014 0.141 7
0.087 -0.08 0.299 10
0.097 -0.275 0.187 9
0.112 -0.443 0.002 8
0.063 -0.411 -0.109 8
0.106 -0.316 -0.179 9
0.116 -0.225 -0.262 8
0.104 -0.203 -0.236 9
-0.033 -0.09 -0.335 8
-0.1 -0.058 -0.322 8
-0.123 -0.108 -0.15 9
-0.151 -0.134 0.027 8
-0.164 -0.143 0.087 7
-0.144 -0.226 0.062 10
-0.13 -0.203 0.056 8
-0.107 -0.334 -0.018 9
-0.079 -0.426 -0.177 8
-0.015 -0.465 -0.26 9
0.06 -0.461 -0.182 8
0.142 -0.428 -0.192 8
0.237 -0.395 -0.443 9
0.213 -0.355 -0.399 8
0.338 -0.339 -0.696 8
0.466 -0.326 -0.923 9
0.53 -0.337 -1.059 7
0.547 -0.462 -1.01 10
0.614 -0.693 -0.883 8
0.725 -0.794 -0.792 8
0.653 -0.715 -0.712 9
0.752 -0.519 -0.669 8
0.792 -0.239 -0.601 9
0.628 -0.076 -0.541 8
0.171 0.064 -0.437 8
-0.381 0.136 -0.122 9
-0.769 0.169 0.275 8
-0.692 0.152 0.247 9
-0.759 0.253 0.64 6
-0.684 0.295 0.911 10
-0.522 0.31 1.0 9
-0.14 0.316 1.03 8
0.304 0.296 1.169 9
0.721 0.251 1.408 8
0.649 0.226 1.267 8
0.947 0.105 1.43 9
0.975 0.019 1.457 8
0.765 0.017 1.26 9
0.565 0.022 0.809 8
0.575 0.163 0.4 8
0.518 0.147 0.36 7
0.719 0.391 0.077 10
0.95 0.563 -0.128 8
1.103 0.699 -0.183 9
1.196 0.746 -0.192 8
1.258 0.715 -0.183 9
1.286 0.635 -0.127 8
1.158 0.571 -0.114 8
1.236 0.548 -0.065 9
1.278 0.506 -0.122 8
1.104 0.31 -0.19 9
0.639 0.112 -0.145 8
0.034 0.01 -0.02 7
-0.396 -0.115 0.166 10
-0.356 -0.104 0.149 8
-0.552 -0.24 0.294 9
-0.593 -0.326 0.301 8
-0.498 -0.283 0.131 8
-0.275 -0.304 -0.11 9
-0.166 -0.399 -0.298 8
-0.213 -0.432 -0.488 9
-0.192 -0.389 -0.439 8
-0.08 -0.505 -0.559 8
0.036 -0.66 -0.403 9
-0.138 -0.737 -0.024 6
-0.477 -0.661 0.175 11
-0.741 -0.533 -0.18 8
-0.851 -0.488 -0.86 8
-0.766 -0.439 -0.774 9
-0.712 -0.52 -1.338 8
-0.543 -0.614 -1.556 8
-0.337 -0.597 -1.371 9
-0.111 -0.528 -1.006 8
0.139 -0.509 -0.693 9
0.275 -0.424 -0.534 8
0.248 -0.382 -0.481 8
0.308 -0.326 -0.594 7
0.26 -0.423 -0.901 10
0.0 -0.514 -1.109 9
-0.3 -0.521 -1.139 8
-0.562 -0.557 -0.945 8
-0.458 -0.717 -0.903 9
-0.412 -0.645 -0.813 8
-0.164 -0.681 -0.757 9
-0.051 -0.632 -0.588 8
0.035 -0.506 -0.544 8
0.053 -0.219 -0.666 9
0.176 -0.093 -1.257 8
0.159 -0.084 -1.131 7
0.236 -0.161 -1.816 10
0.111 -0.318 -2.208 8
-0.081 -0.495 -2.206 9
-0.346 -0.705 -1.851 8
-0.609 -0.899 -1.272 8
-0.767 -0.984 -0.647 9
-0.69 -0.886 -0.582 8
-0.71 -1.009 -0.133 9
-0.611 -1.105 0.047 8
-0.464 -1.005 -0.082 8
-0.202 -0.818 -0.556 9
0.14 -0.679 -1.285 7
0.528 -0.734 -1.948 10
0.475 -0.661 -1.753 8
0.679 -0.89 -2.1 8
0.495 -1.073 -1.966 9
0.057 -1.145 -1.347 8
-0.415 -1.23 -0.389 9
-0.73 -1.356 0.643 8
-0.764 -1.397 1.502 8
-0.687 -1.258 1.352 9
-0.479 -1.207 1.822 8
-0.073 -1.063 1.795 9
0.536 -0.78 1.535 6
1.118 -0.507 1.314 10
1.293 -0.358 0.995 9
1.015 -0.294 0.512 8
0.913 -0.265 0.461 9
0.395 -0.129 0.009 8
-0.094 0.23 -0.477 8
-0.172 0.342 -1.006 9
0.155 0.291 -1.279 8
0.734 0.38 -0.922 8
1.782 0.345 0.458 9
1.604 0.311 0.412 8
2.924 0.238 2.544 7
3.836 0.259 4.229 10
3.888 0.39 4.616 8
3.101 0.497 4.043 9
2.177 0.456 3.633 8
1.959 0.158 4.169 9
1.763 0.142 3.752 8
1.581 -0.35 5.105 8
1.686 -0.767 6.432 9
1.882 -0.869 7.055 8
1.967 -0.208 6.938 9
1.91 0.258 5.715 8
1.719 0.232 5.144 7
1.289 0.427 2.955 10
1.352 0.371 1.571 8
2.565 -0.185 2.267 9
3.614 -0.62 4.224 8
3.784 -0.92 5.851 8
2.977 -0.817 6.346 9
2.679 -0.735 5.711 8
1.541 -0.067 5.301 8
1.222 0.999 4.808 9
1.547 1.8 4.066 8
1.906 1.804 2.162 9
2.746 1.111 -0.408 6
3.667 0.144 -2.654 10
3.3 0.13 -2.388 9
3.608 -0.94 -3.396 8
2.931 -1.958 -2.711 9
1.324 -2.862 -1.077 8
-0.58 -3.678 0.43 8
-2.11 -4.261 1.173 9
-2.996 -4.284 1.325 8
-2.696 -3.855 1.193 9
-3.223 -3.483 0.745 8
-3.678 -3.128 -0.548 8
-3.697 -2.951 -1.589 7
-3.139 -2.818 -1.521 10
-2.601 -2.651 -0.829 9
-2.411 -2.443 -0.341 8
-2.17 -2.198 -0.307 8
-2.178 -1.834 -0.693 9
-2.206 -0.976 -1.82 8
-2.121 -0.385 -3.228 9
-1.986 0.399 -5.548 8
-0.251 2.476 -7.409 8
1.299 3.87 -1.546 9
1.169 3.483 -1.391 8
0.769 5.033 9.809 7
-0.571 5.771 13.978 10
-2.367 2.642 9.835 8
-4.069 -1.025 3.114 9
-5.512 -2.034 -3.279 8
-4.961 -1.831 -2.951 8
-5.29 -0.566 -7.279 9
-4.745 1.482 -9.162 8
-3.789 2.963 -9.797 9
-2.964 4.153 -9.779 8
-1.975 4.864 -9.21 8
-0.672 4.943 -8.269 9
-0.605 4.449 -7.442 7
0.56 4.432 -6.27 10
1.725 3.717 -4.712 8
2.439 2.347 -2.9 8
2.379 0.811 -0.908 9
1.682 -0.542 1.241 8
0.656 -1.509 3.157 9
0.591 -1.358 2.842 8
-0.557 -1.868 4.138 8
-1.533 -2.048 4.76 9
-2.11 -2.182 4.718 8
-2.767 -2.097 3.983 8
-3.467 -1.769 2.917 7
-4.174 -1.305 1.809 10
-3.757 -1.174 1.628 9
-4.211 -0.574 0.737 8
-3.927 -0.077 0.197 8
-3.077 0.307 -0.221 9
-1.834 0.67 -0.564 8
-0.488 0.848 -0.89 9
0.594 0.87 -1.277 8
0.535 0.783 -1.149 8
1.295 0.733 -1.46 9
1.861 0.552 -1.475 8
2.284 0.358 -1.194 7
2.541 0.224 -0.747 10
2.453 0.184 -0.314 8
2.083 0.109 -0.054 9
1.874 0.098 -0.048 8
1.47 0.0 0.057 9
1.071 -0.106 0.02 8
0.614 -0.238 -0.131 8
0.134 -0.264 -0.201 9
-0.321 -0.229 -0.091 8
-0.756 -0.162 0.087 8
-0.681 -0.146 0.078 9
-1.005 -0.03 0.291 7
-1.1 0.049 0.446 10
-0.989 0.015 0.376 8
-0.796 -0.056 0.139 8
-0.516 -0.126 -0.204 9
-0.465 -0.113 -0.509 8
-0.093 -0.102 -0.458 9
0.237 -0.048 -0.493 8
0.464 0.056 -0.298 8
0.578 0.116 -0.105 9
0.516 0.231 -0.056 8
0.297 0.337 -0.134 9
0.267 0.304 -0.121 6
-0.03 0.284 -0.282 10
-0.298 0.218 -0.407 9
-0.469 0.136 -0.386 8
-0.513 -0.013 -0.18 9
-0.405 -0.178 0.106 8
-0.223 -0.256 0.372 8
-0.201 -0.231 0.334 9
-0.051 -0.259 0.484 8
-0.008 -0.276 0.426 9
-0.107 -0.27 0.264 8
-0.204 -0.259 0.105 8
-0.164 -0.254 0.011 7
-0.009 -0.237 0.018 10
-0.008 -0.213 0.016 8
0.175 -0.168 0.084 9
0.313 -0.025 0.149 8
0.339 0.192 0.17 9
0.261 0.316 0.122 8
0.114 0.266 -0.039 8
-0.052 0.157 -0.239 9
-0.047 0.142 -0.215 8
-0.135 0.009 -0.27 9
-0.214 -0.092 -0.15 8
-0.304 -0.14 0.024 7
-0.367 -0.184 0.14 10
-0.414 -0.188 0.182 8
-0.378 -0.193 0.181 9
-0.34 -0.174 0.163 8
-0.224 -0.172 0.153 8
-0.093 -0.161 0.153 9
0.016 -0.175 0.26 8
0.053 -0.259 0.531 9
-0.033 -0.404 0.78 8
-0.03 -0.526 0.768 8
-0.238 -0.474 0.691 9
-0.556 -0.503 0.391 6
-0.943 0.126 -0.061 11
-0.978 0.922 -0.691 8
-0.389 0.5 -1.401 8
0.414 -0.684 -0.939 9
0.373 -0.615 -0.845 8
1.276 -1.364 1.724 9
2.212 -1.899 5.123 8
2.448 -2.086 7.674 8
2.449 -2.688 8.848 9
2.245 -3.258 8.714 8
1.529 -2.986 7.505 8
1.376 -2.687 6.754 7
0.637 -2.324 4.702 10
-0.245 -1.698 2.147 9
-1.026 -1.134 -0.114 8
-1.484 -0.609 -1.309 8
-1.522 -0.173 -1.643 9
-1.205 0.063 -1.718 8
-1.085 0.057 -1.546 9
-0.609 0.135 -1.383 8
0.029 0.069 -1.255 8
0.678 -0.073 -1.447 9
1.037 -0.09 -1.88 8
1.044 0.169 -2.49 7
0.886 0.623 -2.945 10
0.797 0.56 -2.65 8
0.784 1.011 -2.66 9
1.075 1.295 -2.233 8
1.628 1.334 -1.483 8
2.29 1.095 -0.491 9
2.413 1.14 0.291 8
2.43 0.573 0.467 9
2.187 0.515 0.421 8
2.188 -0.175 0.27 8
1.667 0.089 0.123 9
1.159 0.522 -0.051 7
0.744 1.096 -0.408 10
0.453 1.614 -1.032 8
0.305 1.905 -1.872 8
0.274 1.715 -1.685 9
0.258 1.763 -2.651 8
0.286 1.618 -3.66 9
0.407 1.179 -4.492 8
0.66 0.733 -4.837 8
0.671 0.575 -4.691 9
0.604 0.518 -4.222 8
0.045 0.598 -3.799 9
-0.92 0.871 -2.719 6
-1.923 1.321 -1.129 10
-2.582 1.81 0.492 9
-2.704 2.163 1.59 8
-2.51 2.375 1.857 9
-2.259 2.137 1.671 8
-2.007 2.266 1.147 8
-1.599 2.193 0.505 9
-1.052 1.729 0.289 8
-0.511 0.993 0.724 8
-0.371 0.694 1.537 9
-0.352 0.316 2.059 8
-0.317 0.284 1.853 7
0.157 -0.939 1.858 10
0.508 -1.432 1.742 8
0.473 -0.951 1.708 9
0.23 -0.428 1.502 8
-0.204 0.134 1.037 9
-0.642 0.557 0.434 8
-0.577 0.501 0.391 8
-0.761 0.692 -0.18 9
-0.589 0.746 -0.579 8
-0.269 0.717 -0.801 9
0.006 0.611 -0.946 8
0.052 0.523 -1.053 7
-0.113 0.498 -1.179 10
-0.102 0.448 -1.061 8
-0.252 0.418 -1.14 9
-0.311 0.355 -1.044 8
-0.426 0.266 -0.915 8
-0.636 0.259 -0.734 9
-0.827 0.214 -0.466 8
-0.84 -0.1 -0.256 9
-0.756 -0.09 -0.231 8
-0.628 -0.479 -0.092 8
-0.537 -0.739 -0.032 9
-0.542 -0.847 -0.143 6
-0.662 -0.893 -0.418 10
-0.726 -0.872 -0.748 9
-0.616 -0.737 -1.007 8
-0.554 -0.663 -0.906 9
-0.441 -0.544 -1.008 8
-0.516 -0.495 -0.988 8
-0.818 -0.434 -0.919 9
-1.136 -0.366 -0.917 8
-1.229 -0.343 -1.02 9
-1.106 -0.309 -0.918 8
-0.911 -0.286 -1.157 8
-0.606 -0.233 -1.57 7
-0.343 -0.195 -1.844 10
-0.216 -0.18 -1.882 9
-0.304 -0.172 -2.013 8
-0.471 -0.17 -2.187 8
-0.423 -0.153 -1.968 9
-0.553 -0.15 -1.802 8
-0.579 -0.117 -1.286 9
-0.356 -0.101 -0.862 8
-0.017 -0.103 -0.619 8
0.173 -0.045 -0.527 9
0.219 0.013 -0.666 8
0.197 0.012 -0.599 7
0.033 0.029 -0.953 10
-0.36 0.122 -1.232 8
-0.846 0.131 -1.221 9
-1.143 0.023 -0.939 8
-0.923 -0.027 -0.544 8
-0.213 -0.04 -0.231 9
-0.192 -0.036 -0.208 8
0.633 0.125 0.13 9
1.152 0.436 0.473 8
1.212 0.576 0.546 8
0.882 0.474 0.362 9
0.438 0.153 0.187 7
0.013 -0.115 0.063 10
0.012 -0.104 0.057 8
-0.405 0.0 0.023 8
-0.477 0.258 0.018 9
-0.269 0.679 -0.231 8
-0.033 1.179 -0.631 9
0.187 1.352 -0.876 8
0.297 1.239 -0.85 8
0.267 1.115 -0.765 9
0.292 1.017 0.559 8
0.291 0.897 2.137 9
0.227 0.613 1.678 6
-0.072 0.476 0.259 10
-0.439 0.673 -0.379 9
-0.395 0.606 -0.341 8
-0.626 0.906 -0.307 9
-0.607 0.869 0.498 8
-0.312 0.504 0.544 8
0.026 0.274 0.421 9
0.293 0.186 0.304 8
0.47 0.147 0.216 8
0.423 0.132 0.194 9
0.562 0.195 0.002 8
0.663 0.295 -0.224 7
0.613 0.379 -0.333 10
0.411 0.376 -0.422 8
0.177 0.335 -0.431 9
-0.027 0.364 -0.332 8
-0.024 0.327 -0.299 9
-0.111 0.368 -0.215 8
-0.069 0.37 -0.178 8
0.035 0.357 -0.168 9
0.162 0.342 -0.164 8
0.204 0.333 -0.167 9
0.134 0.348 -0.183 8
0.121 0.313 -0.164 7
0.01 0.345 -0.185 10
-0.095 0.373 -0.174 8
-0.155 0.392 -0.085 9
-0.146 0.417 0.154 8
-0.102 0.458 0.508 8
-0.038 0.478 0.827 9
-0.034 0.43 0.744 8
0.055 0.451 0.934 9
0.14 0.447 0.974 8
0.17 0.416 0.871 8
0.133 0.416 0.683 9
0.12 0.49 0.52 6
-0.185 0.595 0.413 10
-0.167 0.535 0.371 9
-0.394 0.587 0.287 8
-0.53 0.57 0.199 9
-0.534 0.514 0.14 8
-0.398 0.446 0.162 8
-0.146 0.358 0.2 9
0.131 0.245 0.162 8
0.118 0.22 0.146 9
0.382 0.163 0.074 8
0.611 0.165 0.035 8
0.705 0.196 0.02 7
0.616 0.241 0.085 10
0.431 0.256 0.195 9
0.388 0.231 0.175 8
0.21 0.228 0.204 8
0.082 0.216 0.134 9
-0.001 0.207 -0.011 8
-0.016 0.193 -0.125 9
0.009 0.176 -0.2 8
0.038 0.152 -0.318 8
0.034 0.136 -0.286 9
0.05 0.111 -0.315 8
0.064 0.097 -0.22 7
0.128 0.091 -0.127 10
0.22 0.092 -0.046 8
0.273 0.087 0.057 9
0.273 0.077 0.171 8
0.245 0.069 0.154 8
0.214 0.044 0.194 9
0.192 0.008 0.187 8
0.174 -0.014 0.181 9
0.113 -0.032 0.139 8
0.041 -0.046 0.116 8
0.003 -0.038 0.161 9
0.002 -0.034 0.145 6
0.016 -0.001 0.195 11
0.06 0.037 0.206 8
0.091 0.087 0.208 8
0.11 0.169 0.2 9
0.121 0.252 0.165 8
0.104 0.307 0.127 9
0.094 0.276 0.114 8
0.065 0.263 0.085 8
0.047 0.176 0.066 9
0.001 0.073 0.061 8
-0.05 -0.008 0.076 8
-0.06 -0.055 0.098 7
-0.026 -0.078 0.1 10
-0.023 -0.07 0.09 9
0.045 -0.078 0.063 8
0.134 -0.072 0.006 8
0.267 -0.065 -0.067 9
0.385 -0.079 -0.14 8
0.389 -0.116 -0.186 9
0.278 -0.207 -0.181 8
0.25 -0.186 -0.162 8
0.079 -0.318 -0.093 9
-0.111 -0.416 0.027 8
-0.265 -0.47 0.147 7
-0.333 -0.504 0.214 10
-0.315 -0.484 0.222 8
-0.283 -0.435 0.181 9
-0.189 -0.357 0.163 8
-0.057 -0.264 0.097 9
0.038 -0.186 0.025 8
0.095 -0.135 -0.026 8
0.154 -0.143 -0.091 9
0.172 -0.172 0.011 8
0.155 -0.155 0.009 8
0.029 -0.171 0.313 9
-0.15 -0.217 0.444 7
-0.253 -0.242 0.393 10
-0.333 -0.194 0.311 8
-0.419 -0.116 0.207 8
-0.5 -0.044 0.123 9
-0.45 -0.039 0.11 8
-0.489 0.035 0.045 9
-0.437 0.124 -0.015 8
-0.332 0.202 -0.05 8
-0.219 0.215 -0.044 9
-0.119 0.145 -0.004 8
-0.067 0.069 0.152 9
-0.061 0.062 0.136 6
-0.066 0.019 0.38 10
-0.069 -0.019 0.452 9
-0.043 -0.053 0.38 8
0.001 -0.066 0.315 9
0.055 -0.061 0.191 8
0.096 -0.047 0.023 8
0.086 -0.042 0.021 9
0.099 -0.027 -0.091 8
0.085 -0.031 -0.114 9
0.063 -0.073 -0.025 8
0.041 -0.119 0.074 8
0.027 -0.141 0.057 7
0.043 -0.199 -0.05 10
0.038 -0.179 -0.045 8
0.034 -0.171 -0.182 9
-0.019 -0.039 -0.303 8
-0.07 0.082 -0.389 9
-0.097 0.131 -0.439 8
-0.116 0.116 -0.43 8
-0.146 0.056 -0.344 9
-0.131 0.05 -0.309 8
-0.197 -0.059 -0.192 9
-0.306 -0.153 -0.067 8
-0.428 -0.143 0.062 7
-0.487 -0.127 0.163 10
-0.445 -0.193 0.15 8
-0.455 -0.201 0.03 9
-0.409 -0.181 0.027 8
-0.526 -0.061 -0.096 8
-0.594 0.043 -0.156 9
-0.575 0.096 -0.139 8
-0.493 0.129 -0.018 9
-0.279 0.006 0.264 8
-0.251 0.006 0.237 8
-0.049 -0.149 0.59 9
0.039 -0.202 0.853 6
0.119 -0.269 0.924 11
0.139 -0.316 0.814 8
0.067 -0.258 0.633 8
-0.029 -0.108 0.369 9
-0.026 -0.097 0.332 8
-0.056 0.053 0.031 9
-0.01 0.147 -0.175 8
0.032 0.163 -0.188 8
0.006 0.121 -0.024 9
-0.125 0.089 0.175 8
-0.216 0.006 0.356 8
-0.194 0.005 0.321 7
-0.148 -0.092 0.381 10
-0.051 -0.051 0.17 9
0.021 0.109 -0.136 8
0.02 0.314 -0.375 8
-0.003 0.445 -0.554 9
-0.055 0.494 -0.714 8
-0.05 0.444 -0.642 9
-0.144 0.463 -0.745 8
-0.123 0.444 -0.67 8
0.001 0.408 -0.567 9
0.126 0.382 -0.519 8
0.189 0.361 -0.456 7
0.151 0.336 -0.356 10
0.136 0.302 -0.321 8
-0.008 0.27 -0.233 9
-0.21 0.236 -0.172 8
-0.341 0.193 -0.061 8
-0.397 0.143 0.043 9
-0.39 0.095 0.115 8
-0.344 0.063 0.147 9
-0.31 0.056 0.133 8
-0.269 0.044 0.079 8
-0.239 0.037 -0.004 9
-0.227 0.04 -0.076 7
-0.235 0.058 -0.135 10
-0.242 0.064 -0.158 8
-0.218 0.062 -0.155 8
-0.196 0.055 -0.14 9
-0.157 0.053 -0.177 8
-0.12 0.048 -0.252 9
-0.089 0.034 -0.329 8
-0.062 0.016 -0.32 8
-0.037 -0.073 -0.177 9
-0.034 -0.066 -0.159 8
-0.129 -0.107 0.06 9
-0.357 -0.022 0.161 6
-0.492 0.017 0.13 10
-0.482 0.033 0.087 9
-0.329 0.043 0.029 8
-0.118 0.033 0.0 9
-0.106 0.029 0.0 8
0.012 0.031 0.016 8
0.065 0.042 0.08 9
0.088 0.057 0.169 8
0.097 0.059 0.229 9
0.072 0.055 0.226 8
0.0 0.054 0.191 8
0.0 0.048 0.172 7
-0.097 0.051 0.141 10
-0.155 0.04 0.088 8
-0.144 0.005 0.02 9
-0.124 -0.062 -0.03 8
-0.115 -0.156 -0.059 9
-0.092 -0.239 -0.074 8
# end
#Thu Feb 26 20:32:03 GMT+08:00 20155
