# Supplementary material for: Abnormal Gait Behavior Detection for Elderly Based on Enhanced Wigner-Ville Analysis and Cloud Incremental SVM Learning
Source: Hindawi journal article supplement (doi:10.1155/2016/5869238), 2016-01-01
Supplement: f1 [file 5869238.f1.zip › Supplementary Materials/Original Data/Leftward fall Ending lying/original__111.txt]

# Accelerometer Values
# filename:  original__111.txt
# Saving start time: Thu Feb 26 20:38:02 GMT+08:00 2015

# sensor resolution: 0.0095825195m/s^2
#Sensorvendor: KIONIX, name: KX023 Accelerometer, type: 1,version : 1, range 39.240005

# X value, Y value, Z value, time diff in ms
-0.203 -0.085 -0.477 8
-0.32 -0.069 -0.381 8
-0.414 -0.046 -0.158 9
-0.224 0.143 0.359 8
-0.202 0.129 0.323 7
-0.048 0.38 0.621 10
-0.077 0.194 0.318 8
-0.137 -0.11 -0.1 9
-0.242 -0.138 -0.35 8
-0.174 -0.133 -0.577 9
0.023 -0.11 -0.902 8
0.02 -0.099 -0.811 8
0.112 -0.061 -1.088 9
0.013 -0.068 -1.341 8
-0.181 -0.081 -1.475 9
-0.364 -0.081 -1.332 8
-0.328 -0.085 -1.061 7
-0.572 -0.125 -0.838 10
-0.515 -0.112 -0.754 8
-0.422 -0.176 -0.767 8
-0.206 -0.267 -1.062 9
0.114 -0.313 -1.441 8
0.358 -0.231 -1.727 9
0.419 -0.11 -1.798 8
0.377 -0.099 -1.619 8
0.299 -0.083 -1.601 9
0.17 -0.229 -1.619 8
0.031 -0.435 -1.695 9
-0.078 -0.59 -1.665 6
-0.169 -0.648 -1.26 10
-0.285 -0.61 -0.535 9
-0.257 -0.549 -0.481 8
-0.327 -0.506 0.345 9
-0.255 -0.655 1.023 8
-0.069 -1.076 1.316 8
0.161 -1.418 1.359 9
0.395 -1.436 1.534 8
0.592 -1.31 1.658 9
0.533 -1.179 1.492 8
0.616 -1.25 1.109 8
0.695 -1.505 0.531 7
0.912 -1.633 0.321 10
1.206 -1.499 0.593 9
1.527 -1.2 0.914 8
1.729 -0.898 0.857 8
1.556 -0.808 0.771 9
1.529 -0.585 0.408 8
1.327 -0.492 -0.11 8
1.114 -0.431 -0.606 9
1.016 -0.306 -0.942 8
1.075 -0.194 -1.081 9
0.968 -0.175 -0.973 8
1.049 -0.124 -1.002 7
1.032 -0.117 -0.988 10
0.976 -0.14 -1.024 8
0.981 -0.213 -1.183 9
1.048 -0.247 -1.552 8
1.014 -0.153 -1.554 8
0.912 -0.138 -1.399 9
0.707 -0.113 -0.683 8
0.194 -0.522 -0.18 9
-0.214 -1.006 0.359 8
-0.176 -1.054 1.012 8
0.023 -1.047 1.131 9
0.021 -0.942 1.018 6
0.231 -0.891 1.149 11
0.541 -0.652 1.21 8
1.004 -0.537 0.68 8
1.274 -0.422 -0.076 9
1.265 -0.297 -0.53 8
1.105 -0.291 -0.676 8
0.736 -0.219 -0.463 9
0.662 -0.197 -0.417 8
0.261 -0.01 0.101 9
0.184 0.172 0.694 8
0.576 0.276 1.211 8
1.185 0.412 1.567 7
1.854 0.553 1.786 10
1.669 0.497 1.608 9
2.401 0.555 1.447 8
3.002 0.557 1.954 8
3.477 0.469 2.069 9
3.806 0.218 2.091 8
3.856 -0.087 2.08 9
3.58 -0.266 2.136 8
3.222 -0.239 1.923 8
2.833 -0.313 2.125 9
2.551 -0.335 2.331 8
2.335 -0.223 2.527 7
2.143 0.0 2.701 10
2.232 0.119 2.791 8
2.466 0.128 2.881 9
2.219 0.115 2.593 8
2.173 0.134 2.663 8
1.828 0.154 2.658 9
1.477 0.091 2.733 8
1.286 -0.096 2.985 9
1.286 -0.267 3.271 8
1.325 -0.321 3.304 8
1.193 -0.289 2.973 9
1.077 -0.17 2.716 7
0.937 -0.073 2.34 10
0.682 0.084 1.904 8
0.404 0.34 1.409 8
0.351 0.406 1.045 9
0.316 0.365 0.94 8
0.232 0.313 0.743 9
0.184 0.171 0.611 8
0.123 -0.057 0.367 8
-0.251 -0.116 -0.206 9
-0.857 0.14 -1.026 8
-1.207 0.459 -1.865 9
-1.086 0.413 -1.679 6
-0.707 0.671 -2.321 10
-0.153 1.118 -2.572 9
-0.055 1.776 -2.489 8
-0.115 2.178 -2.208 9
-0.271 2.195 -1.906 8
-0.718 2.038 -1.815 8
-0.646 1.834 -1.634 9
-1.445 1.843 -2.006 8
-2.277 2.065 -2.707 8
-2.661 2.363 -3.477 9
-2.489 2.543 -4.02 8
-2.24 2.289 -3.618 7
-0.963 1.333 -3.355 10
-0.867 1.199 -3.02 8
0.138 -0.259 -1.384 9
0.82 -1.801 0.49 8
0.956 -3.023 1.841 9
0.63 -3.745 2.287 8
0.202 -3.92 1.828 8
0.182 -3.528 1.645 9
-0.162 -3.369 0.364 8
-0.455 -2.991 -1.425 9
-0.713 -2.425 -3.167 8
-0.756 -1.848 -4.324 7
-0.332 -1.517 -4.587 10
0.313 -1.303 -4.043 8
0.282 -1.172 -3.639 9
0.895 -1.001 -2.985 8
1.359 -0.922 -2.608 8
1.546 -0.847 -2.454 9
1.334 -0.791 -2.471 8
0.804 -0.79 -2.409 9
-0.026 -0.71 -1.969 8
-0.023 -0.639 -1.772 8
-0.881 -0.38 -1.092 9
-1.198 -0.092 -0.325 6
-0.945 0.177 0.497 10
-0.549 0.353 1.041 9
-0.211 0.459 1.156 8
-0.046 0.512 0.888 9
-0.042 0.461 0.799 8
-0.269 0.414 0.354 8
-1.046 0.413 -0.047 9
-2.249 0.747 -0.421 8
-3.163 1.377 -0.722 9
-3.182 1.83 -1.239 8
-2.864 1.647 -1.115 8
-1.875 1.952 -1.501 7
-0.424 2.386 -1.188 10
0.647 2.853 -0.735 9
0.838 3.066 -0.764 8
-0.037 2.97 -1.111 8
-1.743 2.76 -1.086 9
-1.569 2.484 -0.977 8
-3.442 2.452 -0.469 9
-4.783 2.571 0.039 8
-5.217 2.679 0.577 8
-4.534 2.625 1.727 9
-2.978 2.622 3.167 8
-2.68 2.36 2.85 7
-1.06 2.409 3.827 10
0.022 2.175 4.178 8
0.44 1.875 4.018 9
0.22 1.603 3.482 8
-0.393 1.267 2.64 8
-0.973 0.843 1.662 9
-1.297 0.356 1.036 8
-1.167 0.321 0.932 9
-1.388 -0.123 0.864 8
-1.522 -0.51 1.014 8
-1.364 -0.911 1.182 9
-0.909 -1.309 1.475 7
-0.536 -1.589 1.779 10
-0.483 -1.43 1.601 8
-0.492 -1.632 1.695 8
-0.39 -1.606 1.473 9
0.015 -1.259 0.966 8
0.46 -1.002 0.239 9
0.897 -0.999 -0.475 8
1.177 -1.125 -0.857 8
1.059 -1.013 -0.771 9
0.966 -1.322 -0.938 8
0.636 -1.488 -1.096 9
0.388 -1.222 -1.455 6
0.237 -0.742 -1.771 10
0.155 -0.198 -1.711 9
0.073 0.209 -1.571 8
0.065 0.188 -1.414 9
0.004 0.36 -1.624 8
-0.048 0.438 -2.08 8
-0.198 0.571 -1.766 9
-0.442 0.885 1.013 8
-0.503 1.036 2.706 8
-0.155 0.71 0.881 9
-0.14 0.639 0.793 8
0.501 0.169 -1.193 7
1.18 -0.047 -2.028 10
1.603 -0.01 -1.83 8
1.77 0.052 -0.916 9
1.779 0.057 -0.072 8
1.601 0.051 -0.065 9
1.531 -0.012 0.051 8
1.449 -0.135 -0.263 8
1.494 -0.193 -0.356 9
1.6 -0.126 -0.144 8
1.56 -0.032 0.031 9
1.479 0.044 0.175 8
1.331 0.04 0.157 7
1.295 0.07 0.373 10
1.169 0.06 0.51 8
0.844 0.088 0.381 9
0.388 0.26 -0.057 8
-0.111 0.558 -0.586 8
-0.52 0.751 -1.027 9
-0.468 0.676 -0.924 8
-0.816 0.962 -1.144 8
-1.12 1.451 -0.901 9
-0.897 1.547 -0.332 8
-0.131 0.949 0.173 9
-0.118 0.854 0.156 6
1.039 -0.337 1.123 10
0.935 -0.303 1.01 9
0.965 -0.734 1.443 8
0.631 -0.941 1.7 9
0.196 -1.021 1.769 8
-0.194 -1.098 1.607 8
-0.563 -0.993 1.277 9
-0.506 -0.894 1.15 8
-0.739 -0.7 0.869 9
-0.791 -0.494 0.592 8
-0.671 -0.283 0.234 8
-0.421 -0.121 -0.05 7
-0.18 -0.035 -0.149 10
-0.094 -0.025 -0.166 9
-0.085 -0.022 -0.149 8
-0.097 -0.129 -0.105 8
-0.08 -0.314 0.018 9
-0.005 -0.417 0.06 8
0.153 -0.516 -0.001 9
0.318 -0.645 -0.055 8
0.318 -0.569 -0.077 8
0.286 -0.512 -0.069 9
0.097 -0.231 -0.02 8
-0.128 -0.007 0.033 7
-0.305 0.088 0.012 10
-0.419 0.129 -0.081 8
-0.464 0.082 -0.172 9
-0.418 0.073 -0.23 8
-0.433 0.066 -0.207 8
-0.423 -0.179 -0.302 9
-0.398 -0.27 -0.357 8
-0.39 -0.338 -0.339 9
-0.394 -0.292 -0.305 8
-0.378 -0.212 -0.243 8
-0.34 -0.191 -0.219 9
-0.356 -0.117 -0.162 7
-0.433 -0.026 -0.146 10
-0.537 0.025 -0.084 8
-0.605 0.083 0.045 8
-0.489 0.202 0.104 9
-0.22 0.285 0.067 8
-0.198 0.256 0.06 9
0.086 0.28 0.014 8
0.346 0.275 0.034 8
0.529 0.199 0.131 9
0.604 0.049 0.257 8
0.573 -0.137 0.343 8
0.515 -0.123 0.309 7
0.429 -0.308 0.363 10
0.348 -0.419 0.384 9
0.297 -0.445 0.312 8
0.227 -0.413 0.2 8
0.053 -0.27 0.087 9
-0.154 -0.056 -0.027 8
-0.371 0.072 -0.131 9
-0.334 0.065 -0.118 8
-0.589 0.12 -0.206 8
-0.733 0.167 -0.265 9
-0.68 0.229 -0.311 8
-0.475 0.297 -0.307 7
-0.162 0.284 -0.185 10
-0.146 0.256 -0.166 8
0.222 0.144 0.102 9
0.511 -0.016 0.415 8
0.663 -0.213 0.652 9
0.707 -0.382 0.804 8
0.659 -0.465 0.81 8
0.52 -0.45 0.669 9
0.468 -0.405 0.602 8
0.334 -0.357 0.428 8
0.294 -0.334 0.254 9
0.313 -0.321 0.094 7
0.297 -0.285 0.036 10
0.245 -0.32 0.055 8
0.182 -0.446 0.0 8
0.164 -0.402 0.0 9
0.089 -0.453 -0.137 8
0.047 -0.373 -0.241 9
0.004 -0.236 -0.302 8
-0.073 -0.111 -0.338 8
-0.026 -0.166 -0.484 9
0.139 -0.415 -0.457 8
0.125 -0.373 -0.412 9
0.156 -0.32 -0.184 6
0.153 -0.069 -0.241 10
0.158 0.03 -0.413 9
0.025 0.111 -0.484 8
-0.196 0.153 -0.492 9
-0.176 0.138 -0.443 8
-0.356 0.163 -0.427 8
-0.418 0.183 -0.399 9
-0.377 0.177 -0.359 8
-0.286 0.146 -0.307 9
-0.237 0.116 -0.235 8
-0.243 0.107 -0.169 8
-0.219 0.096 -0.152 7
-0.208 0.081 -0.126 10
-0.203 0.063 -0.109 9
-0.219 0.05 -0.087 8
-0.222 0.019 -0.055 8
-0.225 -0.016 0.012 9
-0.219 -0.064 0.161 8
-0.197 -0.058 0.145 8
-0.162 -0.169 0.374 9
-0.098 -0.269 0.551 8
-0.035 -0.251 0.601 9
0.0 -0.165 0.53 8
0.0 -0.148 0.477 7
-0.059 0.029 0.164 10
-0.053 0.026 0.148 8
-0.078 0.125 -0.059 9
-0.088 0.22 -0.101 8
-0.089 0.246 0.131 8
-0.101 0.181 0.401 9
-0.078 0.097 0.525 8
-0.07 0.087 0.472 9
-0.054 0.064 0.344 8
-0.074 0.12 0.083 8
-0.083 0.198 -0.064 9
-0.087 0.268 -0.2 6
-0.067 0.239 -0.262 11
-0.155 0.204 -0.288 8
-0.14 0.184 -0.259 8
-0.42 0.201 -0.245 9
-0.661 0.101 -0.024 8
-0.696 -0.028 0.197 8
-0.528 -0.081 0.215 9
-0.261 -0.083 0.102 8
-0.034 -0.044 -0.047 9
-0.03 -0.04 -0.042 8
0.108 0.022 -0.155 8
0.141 0.087 -0.2 7
0.115 0.106 -0.123 10
0.01 0.111 -0.053 9
-0.192 0.15 -0.143 8
-0.32 0.119 -0.19 8
-0.288 0.107 -0.171 9
-0.256 0.096 -0.169 8
-0.117 0.175 -0.252 9
0.052 0.228 -0.327 8
0.166 0.233 -0.316 8
0.214 0.212 -0.258 9
0.193 0.19 -0.232 8
0.204 0.158 -0.141 7
0.201 0.105 -0.045 10
0.197 0.064 -0.014 8
0.197 0.058 -0.046 9
0.252 0.051 -0.024 8
0.245 0.085 -0.087 8
0.22 0.077 -0.078 9
0.111 0.101 -0.177 8
-0.009 0.066 -0.089 9
-0.076 0.043 0.002 8
-0.009 0.018 0.078 8
0.059 0.034 0.028 9
0.053 0.031 0.025 7
0.072 0.087 -0.157 10
0.078 0.127 -0.228 8
0.026 0.17 -0.21 8
-0.107 0.191 -0.176 9
-0.189 0.149 -0.099 8
-0.255 0.102 -0.115 9
-0.329 0.061 -0.181 8
-0.296 0.055 -0.163 8
-0.331 0.028 -0.248 9
-0.213 0.083 -0.195 8
0.057 0.092 0.243 9
0.092 0.079 0.587 6
-0.025 0.093 0.711 10
-0.023 0.084 0.64 9
-0.025 0.031 0.748 8
0.015 -0.019 0.756 9
0.008 -0.034 0.685 8
-0.026 -0.019 0.483 8
-0.112 0.016 0.197 9
-0.205 0.041 0.002 8
-0.184 0.037 0.002 9
-0.184 0.026 -0.063 8
-0.127 0.002 -0.041 8
-0.09 -0.038 0.054 7
-0.089 -0.017 0.197 10
-0.162 0.031 0.214 8
-0.3 -0.004 0.072 9
-0.27 -0.003 0.065 8
-0.378 0.004 -0.039 9
-0.426 0.079 -0.084 8
-0.458 0.121 -0.119 8
-0.48 0.119 -0.131 9
-0.47 -0.026 -0.126 8
-0.423 -0.023 -0.114 9
-0.471 -0.065 -0.102 8
-0.476 -0.077 -0.031 7
-0.414 -0.13 0.173 10
-0.266 -0.11 0.244 8
0.036 -0.122 0.306 9
0.34 -0.083 0.36 8
0.306 -0.075 0.324 8
0.506 -0.011 0.342 9
0.579 0.082 0.311 8
0.586 0.19 0.162 9
0.566 0.262 -0.07 8
0.52 0.295 -0.251 8
0.42 0.307 -0.346 9
0.378 0.276 -0.311 6
0.204 0.266 -0.378 11
-0.02 0.243 -0.356 8
-0.153 0.221 -0.298 8
-0.043 0.183 -0.334 9
0.171 0.119 -0.398 8
0.379 0.053 -0.397 8
0.341 0.048 -0.357 9
0.55 -0.008 -0.288 8
0.668 -0.057 -0.189 9
# end
#Thu Feb 26 20:38:06 GMT+08:00 20151
