# Supplementary material for: Abnormal Gait Behavior Detection for Elderly Based on Enhanced Wigner-Ville Analysis and Cloud Incremental SVM Learning
Source: Hindawi journal article supplement (doi:10.1155/2016/5869238), 2016-01-01
Supplement: f1 [file 5869238.f1.zip › Supplementary Materials/Original Data/Leftward fall Ending lying/original__112.txt]

# Accelerometer Values
# filename:  original__112.txt
# Saving start time: Thu Feb 26 20:38:08 GMT+08:00 2015

# sensor resolution: 0.0095825195m/s^2
#Sensorvendor: KIONIX, name: KX023 Accelerometer, type: 1,version : 1, range 39.240005

# X value, Y value, Z value, time diff in ms
-0.231 0.002 -0.659 8
-0.357 -0.03 -0.714 9
-0.429 -0.033 -0.712 8
-0.467 -0.023 -0.645 8
-0.471 -0.037 -0.541 9
-0.424 -0.033 -0.487 7
-0.382 -0.055 -0.383 10
-0.248 -0.089 -0.324 8
-0.036 -0.123 -0.318 8
0.146 -0.129 -0.322 9
0.238 -0.125 -0.285 8
0.263 -0.138 -0.207 9
0.237 -0.124 -0.186 8
0.233 -0.132 -0.092 8
0.205 -0.121 0.027 9
0.158 -0.143 0.117 8
0.051 -0.18 0.152 9
0.046 -0.162 0.137 6
-0.107 -0.152 0.074 10
-0.186 -0.137 0.067 9
-0.141 -0.016 -0.037 8
-0.037 0.047 -0.138 9
0.07 0.109 -0.203 8
0.145 0.144 -0.209 8
0.167 0.134 -0.182 9
0.151 0.121 -0.163 8
0.093 0.071 -0.127 8
-0.07 -0.001 -0.082 9
-0.256 -0.065 -0.04 8
-0.35 -0.129 -0.018 7
-0.379 -0.191 -0.018 10
-0.398 -0.219 -0.025 8
-0.358 -0.197 -0.022 9
-0.376 -0.205 -0.029 8
-0.36 -0.205 -0.035 9
-0.264 -0.198 -0.061 8
-0.127 -0.198 -0.143 8
-0.072 -0.19 -0.283 9
-0.11 -0.179 -0.467 8
-0.099 -0.161 -0.42 9
-0.138 -0.148 -0.607 8
-0.148 -0.124 -0.693 7
-0.115 -0.097 -0.658 10
0.002 -0.079 -0.526 8
0.178 -0.074 -0.342 8
0.293 -0.081 -0.185 9
0.264 -0.073 -0.166 8
0.277 -0.099 -0.097 9
0.245 -0.153 -0.196 8
0.253 -0.209 -0.389 8
0.289 -0.254 -0.516 9
0.301 -0.302 -0.559 8
0.271 -0.272 -0.503 9
0.263 -0.297 -0.525 6
0.238 -0.303 -0.581 10
0.188 -0.322 -0.733 9
0.143 -0.361 -0.895 8
0.065 -0.434 -1.074 9
0.022 -0.531 -1.277 8
0.02 -0.478 -1.149 8
0.148 -0.589 -1.171 9
0.432 -0.718 -1.048 8
0.757 -0.858 -0.916 9
0.953 -1.048 -0.807 8
1.012 -1.223 -0.732 8
0.91 -1.101 -0.659 7
0.905 -1.166 -0.555 10
0.798 -1.073 -0.405 9
0.586 -0.912 -0.297 8
0.384 -0.861 -0.345 8
0.263 -0.868 -0.577 9
0.23 -0.817 -0.837 8
0.279 -0.645 -1.08 9
0.251 -0.58 -0.972 8
0.197 -0.468 -1.442 8
0.062 -0.476 -1.991 9
-0.01 -0.414 -2.331 8
-0.163 -0.32 -2.425 7
-0.378 -0.302 -2.221 10
-0.34 -0.272 -1.999 8
-0.521 -0.303 -1.554 9
-0.702 -0.316 -1.062 8
-0.843 -0.311 -0.597 8
-0.896 -0.31 -0.19 9
-0.845 -0.291 0.053 8
-0.625 -0.235 0.095 9
-0.562 -0.211 0.086 8
-0.16 -0.081 0.095 8
0.356 0.039 0.269 9
0.834 0.011 0.644 6
1.117 -0.033 1.13 11
1.099 0.049 1.543 8
0.806 0.271 1.716 8
0.725 0.244 1.544 9
0.388 0.546 1.531 8
0.242 0.836 1.417 8
0.418 1.102 1.254 9
0.93 1.249 1.279 8
1.583 1.123 1.646 9
2.049 0.969 2.163 8
1.844 0.872 1.946 8
2.103 0.93 2.442 7
2.279 1.097 2.829 10
2.357 1.421 2.955 9
2.23 1.852 2.855 8
1.991 2.21 2.66 8
1.792 1.989 2.394 9
1.662 2.208 2.315 8
1.606 2.232 2.532 9
1.608 2.124 3.008 8
1.741 2.008 3.68 8
1.939 1.923 4.386 9
2.142 1.868 4.798 8
1.928 1.681 4.318 7
2.053 1.775 4.459 10
1.964 1.914 4.336 8
1.687 1.957 3.987 9
1.277 1.897 3.571 8
0.769 1.713 3.133 9
0.3 1.492 2.73 8
0.27 1.343 2.457 8
0.008 1.106 2.097 9
-0.056 0.776 1.606 8
0.053 0.483 1.063 8
0.074 0.274 0.516 9
-0.291 0.201 -0.049 7
-0.863 0.509 -0.412 10
-0.777 0.458 -0.371 8
-0.927 0.659 -0.496 8
-0.488 0.552 -0.584 9
0.161 0.544 -0.594 8
0.895 0.444 -0.495 9
1.604 -0.095 -0.435 8
1.443 -0.085 -0.521 8
1.76 -0.077 -0.469 9
1.361 -2.129 -0.72 8
0.361 -2.643 -0.982 9
-0.897 -2.52 -1.259 6
-2.15 -2.165 -1.849 10
-2.989 -2.131 -2.802 9
-2.69 -1.918 -2.521 8
-2.805 -1.718 -3.137 9
-2.273 -1.242 -3.026 8
-1.233 -0.957 -2.389 8
0.051 -0.94 -1.263 9
1.099 -1.153 -0.058 8
1.543 -1.306 0.574 9
1.389 -1.175 0.516 8
1.318 -1.255 0.518 8
0.816 -1.226 0.123 7
0.003 -0.977 -0.443 10
-0.699 -0.63 -0.788 8
-0.798 -0.238 -0.777 9
-0.092 0.075 -0.582 8
-0.083 0.068 -0.524 9
1.05 0.24 -0.23 8
2.157 0.063 0.145 8
2.829 -0.567 0.23 9
2.809 -1.332 -0.063 8
1.845 -1.608 -0.402 9
0.119 -1.285 -0.54 8
0.107 -1.157 -0.486 7
-1.609 -0.735 -0.655 10
-2.736 -0.291 -1.143 8
-2.816 0.084 -1.755 9
-1.699 0.274 -2.31 8
-0.058 0.411 -2.838 8
-0.053 0.37 -2.554 9
1.372 0.534 -2.986 8
1.878 0.507 -3.2 9
0.926 0.424 -3.078 8
-0.873 0.378 -2.57 8
-2.968 0.44 -1.785 9
-2.671 0.396 -1.606 6
-4.764 0.943 -0.551 11
-6.242 1.854 0.637 8
-6.566 2.733 1.595 8
-5.33 2.747 2.221 9
-3.215 1.999 2.492 8
-1.436 1.444 2.276 8
-0.394 1.101 1.643 9
-0.354 0.991 1.479 8
0.075 0.705 0.588 9
0.135 0.38 -0.314 8
0.014 0.027 -1.107 8
-0.254 -0.2 -1.769 7
-0.559 -0.304 -2.089 10
-0.733 -0.405 -2.127 9
-0.659 -0.364 -1.914 8
-0.66 -0.44 -1.696 8
-0.509 -0.395 -1.245 9
-0.254 -0.435 -0.756 8
0.017 -0.645 -0.334 9
0.194 -0.816 -0.113 8
0.174 -0.734 -0.101 8
0.302 -0.792 -0.021 9
0.388 -0.794 -0.061 8
0.339 -0.766 -0.267 7
0.156 -0.709 -0.524 10
-0.016 -0.63 -0.744 8
-0.016 -0.544 -0.9 9
-0.015 -0.489 -0.81 8
0.124 -0.423 -0.787 8
0.434 -0.357 -0.543 9
0.953 -0.221 -0.139 8
1.452 -0.014 0.095 9
1.828 0.24 -0.081 8
2.005 0.504 -0.476 8
1.805 0.453 -0.428 9
1.623 0.766 -0.818 7
1.087 1.102 -1.074 10
0.617 1.325 -1.097 8
0.61 1.149 -0.75 8
0.843 0.67 -0.478 9
1.238 0.405 -0.38 8
1.115 0.365 -0.342 9
1.685 0.226 -0.092 8
2.151 0.023 0.271 8
2.537 -0.153 0.724 9
2.756 -0.259 1.091 8
2.467 -0.125 1.179 9
2.22 -0.113 1.061 6
1.536 0.296 0.77 10
0.773 0.69 0.095 9
0.104 0.974 -0.761 8
-0.28 1.201 -1.436 8
-0.353 1.53 -1.533 9
-0.111 1.817 -1.094 8
-0.1 1.635 -0.985 9
0.455 1.458 -0.292 8
1.112 0.91 0.517 8
1.645 0.32 1.2 9
2.026 -0.197 1.536 8
2.169 -0.55 1.483 7
1.92 -0.533 1.196 10
1.728 -0.479 1.076 8
1.178 -0.191 0.577 9
0.597 0.061 -0.072 8
0.163 0.21 -0.532 9
-0.196 0.257 -0.696 8
-0.503 0.126 -0.599 8
-0.823 -0.205 -0.39 9
-0.741 -0.185 -0.351 8
-1.052 -0.516 -0.215 9
-1.198 -0.661 -0.14 8
-1.215 -0.666 -0.101 7
-1.234 -0.528 -0.19 10
-1.235 -0.312 -0.499 8
-1.112 -0.124 -0.807 9
-1.049 -0.111 -0.726 8
-0.936 0.068 -0.807 8
-0.733 0.207 -0.655 9
-0.47 0.218 -0.45 8
-0.256 0.127 -0.361 8
-0.117 0.028 -0.213 9
-0.105 0.025 -0.191 8
-0.096 -0.063 0.082 9
-0.169 -0.141 0.305 6
-0.211 -0.157 0.375 10
-0.168 -0.079 0.293 9
0.0 0.06 0.168 8
0.184 0.219 0.154 9
0.166 0.197 0.139 8
0.259 0.332 0.281 8
0.284 0.363 0.59 9
0.276 0.256 0.954 8
0.262 0.053 1.205 9
0.253 -0.178 1.306 8
0.253 -0.351 1.23 8
0.227 -0.316 1.107 7
0.275 -0.41 0.947 10
0.304 -0.472 0.801 9
0.249 -0.49 0.696 8
0.189 -0.481 0.636 8
0.207 -0.469 0.582 9
0.3 -0.46 0.495 8
0.27 -0.414 0.445 9
0.379 -0.392 0.372 8
0.418 -0.375 0.347 8
0.318 -0.346 0.352 9
0.142 -0.274 0.294 8
0.127 -0.247 0.265 7
0.0 -0.186 0.183 10
-0.058 -0.161 0.111 8
-0.051 -0.135 -0.043 9
0.105 -0.116 -0.19 8
0.294 -0.114 -0.281 8
0.342 -0.104 -0.413 9
0.222 -0.095 -0.47 8
0.199 -0.085 -0.423 9
0.0 -0.084 -0.35 8
-0.159 -0.132 -0.235 8
-0.296 -0.247 -0.058 9
-0.381 -0.349 0.126 6
-0.377 -0.406 0.176 11
-0.334 -0.422 0.072 8
-0.3 -0.38 0.065 8
-0.266 -0.348 -0.121 9
-0.334 -0.258 -0.277 8
-0.529 -0.202 -0.299 9
-0.733 -0.22 -0.163 8
-0.849 -0.238 0.04 8
-0.764 -0.254 0.19 9
-0.688 -0.228 0.171 8
-0.729 -0.259 0.231 8
-0.567 -0.258 0.207 7
-0.401 -0.214 0.104 10
-0.366 -0.177 0.034 9
-0.438 -0.138 0.09 8
-0.394 -0.124 0.081 8
-0.525 -0.103 0.191 9
-0.652 -0.112 0.279 8
-0.685 -0.101 0.323 9
-0.561 -0.051 0.313 8
-0.331 0.004 0.266 8
-0.095 0.039 0.231 9
-0.086 0.035 0.208 8
0.042 0.052 0.196 7
0.0 0.072 0.2 10
-0.096 0.101 0.19 8
-0.151 0.104 0.095 9
-0.145 0.134 -0.042 8
-0.058 0.178 -0.168 9
-0.052 0.16 -0.151 8
0.092 0.157 -0.238 8
0.224 0.133 -0.178 9
0.254 0.084 -0.012 8
0.16 0.01 0.128 9
0.052 -0.026 0.185 8
0.047 -0.023 0.167 7
-0.018 -0.002 0.088 10
-0.074 0.043 -0.038 8
-0.133 0.065 -0.102 9
-0.187 0.07 -0.114 8
-0.194 0.038 -0.11 8
-0.113 -0.024 -0.072 9
-0.102 -0.022 -0.065 8
0.049 -0.099 -0.106 8
0.207 -0.196 -0.091 9
0.274 -0.189 0.069 8
0.274 -0.116 0.072 9
0.261 -0.098 -0.003 6
0.229 -0.061 -0.048 10
0.206 -0.055 -0.043 9
0.193 -0.011 -0.129 8
0.242 0.012 -0.182 9
0.301 0.035 -0.14 8
0.311 0.058 -0.112 8
0.295 0.113 -0.223 9
0.243 0.201 -0.469 8
0.219 0.181 -0.422 9
0.141 0.227 -0.598 8
0.044 0.241 -0.465 8
-0.015 0.235 -0.25 7
-0.009 0.118 -0.147 10
-0.012 -0.031 0.006 9
-0.011 -0.028 0.005 8
-0.019 -0.11 0.005 8
0.011 -0.165 0.233 9
0.001 -0.18 0.155 8
-0.112 -0.146 -0.056 8
-0.233 -0.075 -0.315 9
-0.302 0.015 -0.389 8
-0.272 0.014 -0.35 9
-0.32 0.061 -0.203 8
-0.337 -0.009 0.0 7
-0.297 -0.147 0.201 10
-0.203 -0.237 0.367 8
-0.079 -0.248 0.449 9
0.035 -0.206 0.467 8
0.032 -0.185 0.42 8
0.105 -0.136 0.391 9
0.118 -0.093 0.327 8
0.113 -0.055 0.233 9
0.121 -0.028 0.174 8
0.062 -0.006 0.19 8
-0.082 -0.007 0.229 9
-0.074 -0.006 0.206 6
-0.195 -0.037 0.254 11
-0.247 -0.053 0.303 8
-0.261 -0.015 0.292 8
-0.25 0.065 0.204 9
-0.187 0.148 0.042 8
-0.168 0.133 0.038 8
-0.048 0.211 -0.164 9
0.102 0.289 -0.292 8
0.197 0.333 -0.277 9
0.128 0.336 -0.155 8
-0.047 0.312 0.02 8
-0.043 0.281 0.018 7
-0.177 0.23 0.222 10
-0.231 0.162 0.398 9
-0.229 0.094 0.466 8
-0.172 0.011 0.391 8
-0.065 -0.065 0.211 9
0.094 -0.098 0.003 8
0.264 -0.092 -0.245 9
0.238 -0.083 -0.221 8
0.206 -0.028 -0.537 8
0.0 -0.001 -0.52 9
-0.169 -0.07 -0.168 8
-0.238 -0.148 0.062 7
-0.218 -0.2 0.089 10
-0.163 -0.224 0.001 8
-0.147 -0.201 0.0 9
-0.104 -0.188 -0.116 8
-0.101 -0.14 -0.357 9
-0.167 0.036 -0.71 8
-0.251 0.127 -0.855 8
-0.204 -0.062 -0.779 9
-0.184 -0.056 -0.531 8
-0.137 -0.05 -0.478 8
-0.186 0.044 -0.064 9
-0.24 -0.051 0.293 7
-0.262 -0.205 0.606 10
-0.233 -0.158 0.875 8
-0.027 -0.013 0.888 8
-0.024 -0.011 0.799 9
0.444 0.031 0.597 8
0.963 0.164 0.395 9
1.292 0.29 0.299 8
1.351 0.397 0.355 8
1.229 0.55 0.522 9
1.013 0.698 0.644 8
0.912 0.628 0.58 9
0.665 0.708 0.574 6
0.36 0.786 0.43 10
0.183 0.813 0.144 9
0.218 0.725 -0.16 8
0.292 0.632 -0.407 9
0.415 0.525 -0.57 8
0.373 0.472 -0.513 8
0.543 0.282 -0.566 9
# end
#Thu Feb 26 20:38:12 GMT+08:00 20159
