# Supplementary material for: Abnormal Gait Behavior Detection for Elderly Based on Enhanced Wigner-Ville Analysis and Cloud Incremental SVM Learning
Source: Hindawi journal article supplement (doi:10.1155/2016/5869238), 2016-01-01
Supplement: f1 [file 5869238.f1.zip › Supplementary Materials/Original Data/Leftward fall Ending lying/original__113.txt]

# Accelerometer Values
# filename:  original__113.txt
# Saving start time: Thu Feb 26 20:38:15 GMT+08:00 2015

# sensor resolution: 0.0095825195m/s^2
#Sensorvendor: KIONIX, name: KX023 Accelerometer, type: 1,version : 1, range 39.240005

# X value, Y value, Z value, time diff in ms
-0.103 0.002 -0.312 8
-0.021 0.018 -0.462 9
0.005 0.022 -0.49 8
-0.027 0.017 -0.41 8
-0.091 0.011 -0.244 9
-0.152 -0.001 -0.083 8
-0.136 -0.001 -0.075 8
-0.186 -0.016 0.025 9
-0.224 -0.027 0.068 8
-0.192 -0.029 0.059 9
-0.093 -0.032 0.021 6
-0.012 -0.032 -0.02 10
0.051 -0.016 -0.017 9
0.045 -0.014 -0.015 8
0.112 -0.007 0.042 9
0.123 -0.022 0.099 8
0.053 -0.035 0.151 8
-0.063 -0.026 0.187 9
-0.142 -0.005 0.177 8
-0.13 0.011 0.124 9
-0.117 0.01 0.111 8
-0.067 0.02 0.043 8
-0.019 0.026 -0.022 7
0.021 0.032 -0.057 10
0.062 0.036 -0.066 9
0.138 0.036 -0.065 8
0.125 0.032 -0.059 8
0.213 0.032 -0.052 9
0.244 0.03 -0.024 8
0.192 0.021 0.033 8
0.097 -0.004 0.112 9
0.017 -0.047 0.195 8
-0.009 -0.112 0.255 9
-0.008 -0.101 0.229 8
0.01 -0.181 0.234 7
0.053 -0.22 0.18 10
0.095 -0.17 0.106 8
0.154 -0.095 0.022 9
0.237 -0.042 -0.063 8
0.286 0.002 -0.108 8
0.257 0.002 -0.097 9
0.242 0.024 -0.083 8
0.165 0.004 -0.027 9
0.033 -0.059 0.06 8
-0.107 -0.135 0.166 8
-0.184 -0.207 0.244 9
-0.165 -0.187 0.22 6
-0.166 -0.236 0.22 11
-0.111 -0.233 0.151 8
-0.037 -0.168 0.058 8
0.039 -0.075 -0.027 9
0.09 0.001 -0.083 8
0.104 0.04 -0.102 9
0.093 0.036 -0.091 8
0.083 0.049 -0.077 8
0.047 0.048 -0.037 9
0.004 0.057 0.011 8
-0.002 0.081 0.04 8
0.041 0.1 0.033 7
0.104 0.11 0.01 10
0.094 0.099 0.009 9
0.153 0.101 -0.01 8
0.189 0.083 -0.03 8
0.213 0.056 -0.039 9
0.24 0.022 -0.026 8
0.263 -0.013 -0.003 9
0.264 -0.045 0.024 8
0.237 -0.041 0.022 8
0.209 -0.047 0.045 9
0.164 -0.004 0.044 8
0.139 0.039 0.015 7
0.136 0.05 -0.03 10
0.135 0.049 -0.075 8
0.121 0.044 -0.068 9
0.127 0.027 -0.103 8
0.136 0.006 -0.11 9
0.126 -0.013 -0.087 8
0.081 -0.047 -0.038 8
0.009 -0.081 0.029 9
-0.06 -0.123 0.102 8
-0.054 -0.11 0.092 8
-0.096 -0.145 0.133 9
-0.092 -0.163 0.119 7
-0.061 -0.159 0.06 10
-0.04 -0.132 -0.003 8
-0.036 -0.1 -0.054 8
-0.035 -0.069 -0.078 9
-0.032 -0.062 -0.07 8
-0.023 -0.04 -0.072 9
-0.014 -0.026 -0.059 8
-0.029 0.006 -0.039 8
-0.063 0.048 -0.018 9
-0.097 0.057 0.0 8
-0.127 0.046 0.02 9
-0.115 0.042 0.018 6
-0.141 0.038 0.045 10
-0.132 0.03 0.074 9
-0.094 0.025 0.106 8
-0.045 0.019 0.134 9
0.011 0.017 0.15 8
0.009 0.015 0.135 8
0.058 0.02 0.143 9
0.103 0.011 0.126 8
0.13 0.01 0.088 9
0.127 0.029 0.054 8
0.094 0.068 0.041 8
0.084 0.061 0.037 7
0.046 0.1 0.029 10
0.016 0.113 0.003 9
-0.01 0.106 -0.026 8
-0.073 0.105 -0.055 8
-0.166 0.105 -0.077 9
-0.23 0.084 -0.089 8
-0.251 0.053 -0.098 8
-0.226 0.047 -0.088 9
-0.225 0.012 -0.092 8
-0.196 -0.036 -0.091 9
-0.174 -0.068 -0.087 8
-0.196 -0.052 -0.078 7
-0.235 -0.027 -0.071 10
-0.307 -0.006 -0.075 8
-0.276 -0.005 -0.067 9
-0.391 0.019 -0.089 8
-0.471 0.042 -0.145 8
-0.502 0.068 -0.234 9
-0.503 0.09 -0.314 8
-0.483 0.099 -0.355 9
-0.435 0.089 -0.319 8
-0.411 0.088 -0.293 8
-0.4 0.081 -0.197 9
-0.429 0.06 -0.061 6
-0.474 0.022 0.076 11
-0.492 -0.031 0.171 8
-0.46 -0.081 0.19 8
-0.414 -0.073 0.171 9
-0.33 -0.105 0.087 8
-0.231 -0.108 -0.123 8
-0.172 -0.074 -0.458 9
-0.155 -0.083 -0.738 8
-0.176 -0.154 -0.841 9
-0.246 -0.248 -0.842 8
-0.221 -0.223 -0.758 8
-0.331 -0.297 -0.724 7
-0.405 -0.307 -0.679 10
-0.289 -0.142 -0.604 9
-0.238 -0.035 -0.712 8
-0.182 -0.127 -0.818 8
0.02 -0.055 -0.788 9
0.018 -0.05 -0.709 8
0.241 0.134 -0.704 9
0.321 0.074 -0.865 8
0.13 -0.172 -1.259 8
-0.096 -0.312 -1.587 9
-0.281 -0.395 -1.793 8
-0.253 -0.356 -1.614 7
-0.301 -0.472 -1.698 10
-0.158 -0.539 -1.538 8
0.058 -0.566 -1.246 9
0.348 -0.591 -1.057 8
0.717 -0.603 -1.031 8
1.044 -0.64 -1.125 9
0.939 -0.576 -1.012 8
1.077 -0.6 -1.108 9
1.084 -0.706 -1.016 8
1.127 -1.078 -0.788 8
1.12 -1.535 -0.635 9
1.029 -1.851 -0.607 7
0.856 -1.972 -0.64 10
0.771 -1.775 -0.576 8
0.58 -1.799 -0.65 8
0.467 -1.823 -0.81 9
0.387 -1.84 -0.97 8
0.273 -1.795 -1.057 9
0.133 -1.635 -1.135 8
-0.049 -1.325 -1.245 8
-0.044 -1.192 -1.121 9
-0.283 -0.946 -1.296 8
-0.49 -0.866 -1.413 9
-0.515 -0.778 -1.384 6
-0.365 -0.547 -1.117 10
-0.191 -0.303 -0.681 9
-0.059 -0.225 -0.348 8
-0.053 -0.202 -0.313 9
-0.006 -0.264 -0.114 8
-0.152 -0.306 0.223 8
-0.4 -0.204 0.822 9
-0.496 -0.03 1.491 8
-0.246 0.154 2.026 8
-0.221 0.139 1.823 9
0.379 0.313 2.041 8
1.18 0.608 2.021 7
1.874 1.012 1.986 10
2.169 1.364 1.827 8
2.069 1.573 1.582 9
1.732 1.592 1.674 8
1.559 1.433 1.506 9
1.077 1.403 2.055 8
0.616 1.37 2.704 8
0.475 1.423 3.212 9
0.765 1.602 3.43 8
1.378 1.806 3.388 9
2.017 1.925 3.356 8
1.816 1.733 3.021 7
2.222 1.72 3.229 10
2.238 1.548 3.588 8
1.878 1.307 4.036 9
1.232 1.207 4.485 8
0.579 1.412 4.732 8
0.267 1.799 4.643 9
0.24 1.619 4.178 8
0.42 2.012 3.764 9
0.883 2.342 3.122 8
1.218 2.575 2.491 8
1.231 2.601 2.113 9
1.108 2.341 1.901 6
0.833 2.151 1.884 10
0.336 1.771 2.026 9
-0.186 1.381 2.071 8
-0.587 1.063 1.752 9
-0.909 0.806 1.045 8
-0.987 0.762 0.252 8
-0.702 0.756 -0.485 9
-0.632 0.68 -0.437 8
-0.199 0.579 -1.182 9
0.043 0.456 -1.658 8
-0.098 0.307 -1.743 8
-0.408 0.274 -1.686 7
-0.902 0.469 -1.788 10
-0.907 0.615 -1.861 9
-0.817 0.553 -1.675 8
-0.017 0.447 -1.702 8
0.946 0.492 -1.593 9
2.072 0.515 -1.093 8
3.193 0.023 -0.438 9
3.821 -0.829 0.199 8
3.588 -1.733 0.706 8
3.229 -1.56 0.635 9
2.164 -2.074 0.931 8
0.695 -2.278 0.513 7
-0.74 -2.537 -0.705 10
-2.056 -2.395 -1.709 8
-3.001 -1.922 -1.907 9
-2.701 -1.73 -1.717 8
-2.775 -1.351 -1.361 8
-1.966 -1.106 -0.679 9
-0.641 -1.089 0.187 8
0.77 -1.171 0.833 9
1.681 -1.231 0.898 8
1.882 -1.358 0.494 8
1.694 -1.222 0.444 9
1.137 -1.159 -0.212 7
0.081 -0.678 -0.779 10
-0.723 -0.12 -0.925 8
-0.798 0.236 -0.836 8
-0.254 0.335 -0.827 9
0.713 0.336 -0.671 8
0.642 0.302 -0.604 9
1.686 0.108 -0.33 8
2.24 -0.324 -0.318 8
1.941 -0.689 -0.61 9
0.919 -0.741 -1.084 8
-0.345 -0.552 -1.529 9
-0.31 -0.497 -1.376 6
-1.463 -0.123 -1.766 10
-2.014 0.391 -2.263 9
-1.792 0.748 -2.856 8
-1.129 1.101 -3.174 8
-0.703 1.619 -3.025 9
-0.853 1.918 -2.506 8
-0.768 1.726 -2.256 9
-1.265 1.526 -1.313 8
-1.995 1.086 -0.41 8
-2.56 0.579 0.053 9
-2.847 0.114 0.412 8
-2.997 0.022 0.682 7
-2.791 0.098 0.607 10
-2.512 0.088 0.546 8
-2.025 0.036 -0.021 9
-1.518 -0.016 -1.016 8
-1.193 -0.003 -2.114 9
-1.087 -0.066 -2.92 8
-1.258 -0.178 -3.204 8
-1.662 -0.249 -2.914 9
-1.496 -0.224 -2.623 8
-1.865 -0.308 -1.848 9
-2.053 -0.278 -0.891 8
-2.172 -0.047 -0.143 7
-2.092 0.072 0.321 10
-1.686 -0.041 0.559 8
-1.518 -0.17 0.566 8
-1.366 -0.153 0.509 9
-0.4 -0.24 0.375 8
0.008 -0.322 0.166 9
0.238 -0.384 -0.004 8
0.42 -0.421 0.04 8
0.744 -0.434 0.145 9
0.67 -0.39 0.131 8
1.204 -0.428 0.201 9
1.766 -0.32 0.387 6
2.086 -0.12 0.508 10
2.17 -0.14 0.429 9
2.067 -0.138 0.376 8
1.797 0.106 0.395 9
1.617 0.096 0.355 8
1.427 0.287 0.27 8
1.502 0.416 0.122 9
1.681 0.683 0.045 8
1.858 0.89 0.126 9
2.103 0.864 0.329 8
2.318 0.647 0.505 8
2.086 0.582 0.454 7
2.289 0.13 0.559 10
2.38 -0.5 0.624 9
2.144 -0.741 0.972 8
1.636 -0.541 1.379 8
1.258 -0.457 1.52 9
1.132 -0.503 1.441 8
1.019 -0.453 1.296 8
0.693 -0.313 0.898 9
0.183 0.064 0.26 8
-0.351 0.479 -0.45 9
-0.678 0.648 -1.118 8
-0.61 0.583 -1.006 7
-0.729 0.688 -1.388 10
-0.685 0.85 -1.248 8
-0.374 0.783 -0.751 9
0.067 0.46 -0.091 8
0.416 0.052 0.513 8
0.673 -0.229 0.909 9
0.89 -0.34 1.193 8
0.801 -0.306 1.074 9
0.977 -0.297 1.167 8
1.227 -0.058 1.064 8
1.533 0.3 0.89 9
1.549 0.5 0.403 6
1.212 0.578 -0.319 11
0.792 0.575 -0.86 8
0.713 0.517 -0.774 8
0.359 0.448 -0.918 9
0.021 0.369 -0.797 8
-0.177 0.26 -0.641 9
-0.12 0.109 -0.418 8
0.068 -0.014 -0.138 8
0.062 -0.013 -0.124 9
0.214 -0.103 -0.112 8
0.298 -0.195 0.103 8
0.306 -0.265 -0.07 7
0.242 -0.287 -0.412 10
0.084 -0.241 -0.847 9
-0.217 -0.125 -1.195 8
-0.195 -0.113 -1.076 8
-0.607 0.035 -1.218 9
-1.036 0.083 -1.213 8
-1.345 -0.011 -1.133 9
-1.468 -0.134 -1.03 8
-1.432 -0.156 -0.892 8
-1.263 -0.067 -0.654 9
-1.136 -0.06 -0.589 8
-0.847 0.076 -0.305 7
-0.477 0.208 -0.192 10
-0.134 0.268 -0.167 8
0.092 0.234 -0.075 9
0.174 0.161 0.0 8
0.141 0.083 0.029 9
0.126 0.074 0.026 8
-0.018 -0.013 0.048 8
-0.224 -0.064 0.174 9
-0.404 -0.045 0.371 8
-0.505 -0.022 0.506 8
-0.519 -0.045 0.498 9
-0.467 -0.04 0.449 7
-0.386 -0.073 0.327 10
-0.212 -0.101 0.195 8
0.005 -0.182 0.149 8
0.173 -0.292 0.17 9
0.171 -0.376 0.208 8
0.014 -0.427 0.35 9
0.013 -0.384 0.315 8
-0.17 -0.399 0.553 8
-0.299 -0.374 0.683 9
-0.351 -0.327 0.534 8
-0.334 -0.265 0.244 9
-0.245 -0.169 0.043 6
-0.062 -0.114 -0.052 10
-0.056 -0.103 -0.047 9
0.176 -0.075 -0.082 8
0.357 -0.01 -0.089 9
0.445 0.09 -0.092 8
0.51 0.178 -0.062 8
0.556 0.164 0.128 9
0.503 0.079 0.355 8
0.452 0.071 0.32 9
0.354 -0.04 0.41 8
0.277 -0.149 0.374 8
0.228 -0.209 0.173 7
0.203 -0.223 -0.083 10
0.184 -0.219 -0.291 8
0.17 -0.221 -0.413 9
0.153 -0.199 -0.372 8
0.133 -0.194 -0.435 9
0.106 -0.18 -0.482 8
0.062 -0.164 -0.408 8
0.0 -0.143 -0.23 9
-0.029 -0.129 -0.089 8
-0.026 -0.116 -0.08 9
-0.009 -0.108 -0.016 8
0.018 -0.093 0.005 7
0.054 -0.076 0.017 10
0.115 -0.06 0.029 8
0.293 0.005 0.01 9
0.52 0.114 -0.205 8
0.468 0.102 -0.185 8
0.59 0.154 -0.37 9
0.706 0.111 -0.11 8
0.745 0.059 0.187 9
0.59 0.044 0.266 8
0.454 0.0 0.32 8
0.426 0.0 0.248 9
0.384 0.0 0.223 6
0.416 0.063 0.035 11
0.469 0.088 -0.113 8
0.482 0.096 -0.154 8
0.436 0.131 -0.22 9
0.356 0.157 -0.351 8
0.235 0.153 -0.374 8
0.211 0.138 -0.336 9
0.051 0.117 -0.272 8
-0.14 0.055 -0.242 9
-0.278 -0.023 -0.276 8
-0.299 -0.082 -0.313 8
-0.269 -0.074 -0.282 7
-0.239 -0.103 -0.243 10
-0.159 -0.113 -0.195 9
-0.057 -0.131 -0.118 8
-0.005 -0.15 0.053 8
-0.027 -0.182 0.194 9
-0.133 -0.233 0.255 8
-0.282 -0.255 0.331 9
-0.254 -0.229 0.298 8
-0.346 -0.243 0.398 8
-0.303 -0.261 0.424 9
-0.191 -0.255 0.394 8
-0.097 -0.245 0.393 7
-0.029 -0.241 0.463 10
0.02 -0.249 0.582 8
0.018 -0.224 0.523 9
-0.02 -0.264 0.622 8
-0.166 -0.307 0.656 8
-0.385 -0.31 0.669 9
-0.633 -0.289 0.669 8
-0.802 -0.281 0.608 9
-0.862 -0.273 0.484 8
-0.776 -0.245 0.435 8
-0.702 -0.206 0.235 9
-0.438 -0.13 -0.022 7
-0.164 -0.033 -0.231 10
-0.023 0.059 -0.298 8
0.045 0.108 -0.206 8
0.041 0.097 -0.185 9
0.067 0.088 0.01 8
0.042 0.041 0.229 9
-0.062 -0.018 0.401 8
-0.204 -0.048 0.477 8
-0.26 -0.058 0.468 9
-0.229 -0.061 0.422 8
-0.206 -0.055 0.38 9
-0.171 -0.017 0.331 6
-0.156 0.009 0.307 10
-0.059 0.006 0.306 9
0.089 -0.01 0.298 8
0.16 -0.01 0.293 9
0.181 0.013 0.277 8
0.163 0.011 0.249 8
0.164 0.036 0.18 9
0.152 0.055 0.071 8
0.116 0.044 -0.021 9
0.085 -0.017 -0.062 8
-0.026 -0.016 -0.124 8
-0.023 -0.014 -0.111 7
-0.187 0.062 -0.182 10
-0.191 0.051 -0.1 8
-0.107 0.021 0.064 9
-0.032 0.016 0.163 8
0.051 -0.001 0.203 9
0.116 -0.029 0.234 8
0.105 -0.026 0.211 8
0.132 0.0 0.157 9
0.099 0.027 -0.019 8
-0.061 -0.027 -0.127 9
-0.286 -0.064 -0.074 8
-0.376 -0.075 -0.028 7
-0.264 -0.085 -0.127 10
-0.238 -0.076 -0.114 8
-0.027 -0.101 -0.217 9
0.119 -0.106 -0.215 8
0.178 -0.052 -0.209 8
0.194 -0.006 -0.234 9
0.17 0.043 -0.205 8
-0.005 0.072 -0.255 9
-0.004 0.065 -0.229 8
-0.288 0.046 -0.379 8
-0.495 0.056 -0.33 9
-0.592 0.1 -0.202 6
-0.519 0.132 -0.132 10
-0.245 0.132 -0.044 9
0.064 0.121 0.034 8
0.058 0.108 0.031 9
0.23 0.115 0.065 8
0.253 0.137 0.009 8
0.176 0.198 -0.114 9
-0.002 0.264 -0.254 8
-0.276 0.164 -0.378 9
-0.248 0.147 -0.341 8
-0.471 0.048 -0.2 8
-0.524 -0.001 0.148 7
-0.432 -0.135 0.416 10
-0.275 -0.238 0.603 9
-0.078 -0.274 0.676 8
0.057 -0.24 0.63 8
0.052 -0.216 0.567 9
0.009 -0.149 0.45 8
-0.175 -0.015 0.345 9
-0.337 0.113 0.17 8
-0.335 0.147 -0.129 8
-0.205 0.169 -0.387 9
-0.045 0.185 -0.45 8
-0.041 0.167 -0.405 7
0.081 0.162 -0.231 10
0.21 0.149 0.058 8
0.367 0.136 0.313 9
0.5 0.13 0.459 8
0.539 0.123 0.492 8
0.47 0.116 0.437 9
0.423 0.105 0.394 8
0.282 0.096 0.237 9
0.066 0.087 0.058 8
-0.147 0.082 -0.096 8
-0.241 0.074 -0.241 9
-0.217 0.066 -0.217 7
# end
#Thu Feb 26 20:38:20 GMT+08:00 2015
