# Supplementary material for: Abnormal Gait Behavior Detection for Elderly Based on Enhanced Wigner-Ville Analysis and Cloud Incremental SVM Learning
Source: Hindawi journal article supplement (doi:10.1155/2016/5869238), 2016-01-01
Supplement: f1 [file 5869238.f1.zip › Supplementary Materials/Original Data/Leftward fall Ending lying/original__114.txt]

# Accelerometer Values
# filename:  original__114.txt
# Saving start time: Thu Feb 26 20:38:23 GMT+08:00 2015

# sensor resolution: 0.0095825195m/s^2
#Sensorvendor: KIONIX, name: KX023 Accelerometer, type: 1,version : 1, range 39.240005

# X value, Y value, Z value, time diff in ms
-0.25 0.033 -0.047 10
-0.225 0.03 -0.042 9
-0.26 0.029 -0.145 8
-0.23 0.025 -0.218 8
-0.135 0.018 -0.211 9
-0.006 0.014 -0.138 8
0.11 0.009 -0.055 9
0.167 0.002 0.018 8
0.15 0.002 0.016 8
0.166 -0.016 0.071 9
0.153 -0.04 0.129 8
0.108 -0.054 0.178 7
0.059 -0.082 0.183 10
0.032 -0.126 0.159 8
0.017 -0.141 0.137 9
0.015 -0.127 0.123 8
-0.015 -0.119 0.102 9
-0.07 -0.112 0.067 8
-0.112 -0.1 0.019 8
-0.126 -0.075 -0.021 9
-0.114 -0.06 -0.067 8
-0.103 -0.058 -0.108 8
-0.081 -0.052 -0.097 9
-0.049 -0.038 -0.116 7
-0.01 -0.021 -0.105 10
0.011 -0.019 -0.081 8
0.042 -0.015 -0.058 8
0.108 0.017 -0.017 9
0.097 0.015 -0.015 8
0.143 0.057 0.038 9
0.127 0.066 0.068 8
0.055 0.056 0.09 8
-0.042 0.049 0.105 9
-0.116 0.044 0.077 8
-0.131 0.044 0.009 9
-0.118 0.04 0.008 6
-0.09 0.04 -0.078 10
-0.052 0.04 -0.176 9
-0.008 0.051 -0.279 8
0.082 0.077 -0.338 9
0.192 0.093 -0.332 8
0.255 0.086 -0.283 8
0.229 0.077 -0.255 9
0.205 0.058 -0.167 8
0.083 0.038 -0.044 9
-0.056 0.02 0.065 8
-0.116 -0.018 0.122 8
-0.104 -0.016 0.11 7
-0.075 -0.089 0.126 10
-0.019 -0.144 0.119 8
0.016 -0.155 0.105 9
0.059 -0.137 0.082 8
0.103 -0.113 0.043 9
0.118 -0.092 0.01 8
0.092 -0.06 0.002 8
0.083 -0.054 0.002 9
0.016 -0.036 0.026 8
-0.066 -0.019 0.068 9
-0.116 -0.007 0.102 8
-0.136 -0.031 0.116 7
-0.156 -0.061 0.114 10
-0.177 -0.083 0.092 8
-0.159 -0.074 0.082 9
-0.194 -0.056 0.043 8
-0.197 -0.01 -0.007 8
-0.152 0.026 -0.064 9
-0.108 0.057 -0.098 8
-0.097 0.073 -0.086 9
-0.139 0.077 -0.037 8
-0.125 0.069 -0.033 8
-0.175 0.062 0.024 9
-0.165 0.043 0.069 6
-0.14 0.033 0.091 11
-0.165 0.031 0.099 8
-0.214 0.021 0.099 8
-0.223 0.017 0.089 9
-0.2 0.015 0.08 8
-0.201 0.004 0.059 8
-0.231 -0.038 0.027 9
-0.278 -0.07 -0.028 8
-0.312 -0.067 -0.102 9
-0.316 -0.051 -0.168 8
-0.284 -0.046 -0.151 8
-0.276 -0.02 -0.198 7
-0.257 0.021 -0.208 10
-0.235 0.057 -0.175 9
-0.214 0.073 -0.133 8
-0.211 0.079 -0.114 8
-0.253 0.07 -0.139 9
-0.227 0.063 -0.125 8
-0.293 0.048 -0.214 9
-0.353 0.043 -0.375 8
-0.415 0.038 -0.559 8
-0.437 0.015 -0.681 9
-0.456 0.011 -0.66 8
-0.411 0.01 -0.594 7
-0.452 0.03 -0.373 10
-0.44 0.012 -0.1 8
-0.381 -0.031 0.104 9
-0.267 -0.088 0.235 8
-0.1 -0.146 0.216 8
0.047 -0.145 0.002 9
0.142 -0.069 -0.308 8
0.128 -0.062 -0.277 9
0.178 0.032 -0.507 8
0.199 0.091 -0.627 8
0.201 0.11 -0.726 9
0.194 0.09 -0.838 7
0.176 0.041 -0.933 10
0.158 0.037 -0.84 8
0.124 -0.057 -0.904 8
0.084 -0.21 -0.959 9
0.076 -0.401 -1.007 8
0.109 -0.594 -1.009 9
0.221 -0.71 -1.003 8
0.382 -0.758 -0.979 8
0.344 -0.682 -0.881 9
0.459 -0.771 -0.864 8
0.513 -0.902 -0.942 9
0.516 -0.981 -1.112 6
0.475 -1.017 -1.38 10
0.433 -1.023 -1.687 9
0.387 -0.956 -1.856 8
0.349 -0.86 -1.67 9
0.248 -0.684 -1.814 8
0.264 -0.57 -1.892 8
0.515 -0.649 -1.735 9
0.852 -0.781 -1.491 8
1.123 -0.966 -1.299 8
1.162 -1.082 -1.157 9
1.046 -0.974 -1.041 8
0.876 -1.079 -0.932 7
0.687 -1.345 -0.828 10
0.482 -1.663 -0.737 8
0.152 -1.711 -0.644 9
-0.149 -1.54 -0.531 8
-0.134 -1.386 -0.478 9
-0.24 -1.333 -0.311 8
-0.178 -1.295 -0.091 8
0.026 -1.212 0.065 9
0.33 -1.037 0.147 8
0.621 -0.732 0.227 9
0.789 -0.457 0.373 8
0.71 -0.411 0.336 7
0.706 -0.223 0.534 10
0.473 -0.007 0.73 8
0.119 0.215 0.947 9
-0.128 0.373 1.118 8
-0.1 0.528 1.178 8
0.29 0.678 1.209 9
0.261 0.611 1.088 8
0.951 0.753 1.159 9
1.871 0.994 1.328 8
2.779 1.229 1.608 8
3.276 1.241 1.871 9
2.948 1.117 1.684 6
2.137 1.58 1.823 11
1.924 1.422 1.641 8
1.023 1.651 1.473 8
0.36 1.726 1.458 9
0.042 1.552 1.646 8
0.032 1.146 2.193 8
0.164 0.746 3.106 9
0.148 0.671 2.796 8
0.341 0.438 4.022 9
0.535 0.35 5.247 8
0.772 0.502 6.069 8
1.074 0.855 6.316 7
1.188 1.296 6.103 10
0.912 1.7 5.635 9
0.82 1.53 5.071 8
0.257 1.779 4.409 8
-0.438 1.945 3.567 9
-1.077 2.123 2.738 8
-1.482 2.222 2.047 9
-1.44 2.174 1.504 8
-0.877 2.057 0.912 8
-0.789 1.851 0.821 9
0.118 1.721 0.22 8
1.025 1.554 -0.281 7
1.483 1.283 -0.669 10
1.237 0.882 -0.91 8
0.417 0.496 -1.022 9
-0.57 0.275 -1.103 8
-0.513 0.247 -0.993 8
-1.303 0.372 -1.251 9
-1.512 0.685 -1.524 8
-0.702 0.712 -1.777 9
0.716 0.541 -1.948 8
2.175 0.46 -1.44 8
1.957 0.414 -1.296 9
3.281 0.094 -0.178 7
3.981 -0.795 0.888 10
3.967 -1.97 1.482 8
3.273 -2.863 1.451 8
1.94 -3.297 0.886 9
0.21 -3.3 -0.071 8
0.189 -2.97 -0.064 9
-1.527 -2.368 -1.333 8
-2.718 -1.318 -2.412 8
-2.793 -0.696 -2.805 9
-1.878 -0.688 -2.55 8
-0.73 -0.874 -1.643 9
-0.657 -0.786 -1.478 6
0.234 -1.075 -0.073 10
0.689 -1.368 1.307 9
0.67 -1.492 2.162 8
0.245 -1.297 2.245 8
-0.35 -0.816 1.605 9
-0.735 -0.291 0.422 8
-0.557 0.197 -1.007 9
-0.501 0.177 -0.906 8
0.142 0.611 -2.193 8
1.003 0.83 -2.789 9
1.798 0.705 -2.558 8
2.019 0.221 -1.932 7
1.536 -0.393 -1.143 10
1.382 -0.354 -1.029 8
0.463 -0.89 -0.106 9
-0.652 -1.104 0.84 8
-1.605 -0.954 1.349 9
-2.095 -0.7 1.072 8
-2.006 -0.522 0.342 8
-1.486 -0.486 -0.393 9
-1.337 -0.437 -0.354 8
-0.688 -0.504 -0.936 9
-0.308 -0.571 -1.371 8
-0.377 -0.574 -1.786 7
-0.627 -0.397 -2.17 10
-0.944 -0.022 -2.58 8
-1.036 0.447 -3.083 9
-0.932 0.402 -2.775 8
-0.511 1.089 -3.083 8
0.114 1.816 -2.987 9
0.267 2.113 -2.763 8
-0.317 2.044 -2.381 8
-1.361 1.838 -1.553 9
-2.682 1.671 -0.49 8
-2.414 1.503 -0.441 9
-3.696 1.491 0.391 6
-4.314 1.378 0.94 10
-3.857 0.868 1.386 9
-2.674 0.3 1.699 8
-1.312 0.01 1.711 9
-1.181 0.009 1.54 8
0.145 -0.216 1.241 8
1.152 -0.394 0.679 9
1.601 -0.431 -0.127 8
1.548 -0.307 -1.023 9
1.116 -0.113 -1.746 8
0.444 0.081 -2.129 8
0.4 0.073 -1.916 7
-0.195 0.319 -1.959 10
-0.539 0.606 -1.747 9
-0.681 0.837 -1.487 8
-0.641 0.945 -1.208 8
-0.419 0.961 -0.875 9
-0.201 0.957 -0.493 8
-0.181 0.861 -0.444 8
-0.12 0.8 -0.003 9
-0.24 0.552 0.416 8
-0.517 0.131 0.755 9
-0.835 -0.304 1.008 8
-0.995 -0.596 1.141 7
-0.794 -0.651 1.129 10
-0.715 -0.586 1.016 8
-0.077 -0.49 0.931 9
0.757 -0.34 0.834 8
1.418 -0.114 0.7 8
1.782 0.146 0.41 9
1.799 0.409 -0.113 8
1.673 0.629 -0.644 9
1.506 0.566 -0.58 8
1.465 0.697 -0.866 8
1.399 0.723 -1.024 9
1.303 0.648 -1.135 6
1.303 0.489 -1.026 11
1.391 0.292 -0.7 8
1.252 0.262 -0.63 8
1.255 0.054 -0.284 9
1.029 -0.054 0.058 8
0.907 -0.092 0.516 9
1.176 -0.303 0.916 8
1.41 -0.501 0.865 8
1.499 -0.539 0.598 9
1.349 -0.485 0.539 8
1.449 -0.544 0.397 9
1.346 -0.421 0.304 6
1.07 -0.172 0.12 10
0.91 0.107 -0.164 9
0.834 0.466 -0.335 8
0.575 0.714 -0.356 8
0.518 0.643 -0.32 9
0.222 0.708 -0.304 8
0.053 0.621 -0.278 9
0.002 0.499 -0.253 8
0.086 0.424 -0.229 8
0.257 0.407 -0.19 9
0.461 0.464 -0.156 8
0.415 0.418 -0.14 7
0.576 0.493 -0.21 10
0.644 0.627 -0.3 8
0.611 0.743 -0.435 9
0.455 0.77 -0.706 8
0.218 0.837 -0.898 9
0.196 0.754 -0.808 8
-0.062 0.795 -0.841 8
-0.218 0.652 -0.738 9
-0.145 0.364 -0.523 8
0.111 0.053 -0.313 8
0.398 -0.293 -0.097 9
0.358 -0.263 -0.087 7
0.484 -0.501 0.299 10
0.429 -0.584 0.721 8
0.249 -0.634 0.94 8
-0.042 -0.625 0.8 9
-0.294 -0.6 0.351 8
-0.578 -0.61 -0.099 9
-0.957 -0.611 -0.397 8
-0.861 -0.55 -0.357 8
-1.135 -0.526 -0.542 9
-1.223 -0.53 -0.642 8
-1.216 -0.538 -0.615 9
-1.145 -0.559 -0.55 6
-0.988 -0.562 -0.548 10
-0.747 -0.43 -0.565 9
-0.672 -0.387 -0.508 8
-0.457 -0.278 -0.467 9
-0.359 -0.252 -0.302 8
-0.342 -0.29 -0.081 8
-0.378 -0.377 0.18 9
-0.434 -0.403 0.425 8
-0.39 -0.362 0.383 9
-0.376 -0.314 0.537 8
-0.26 -0.162 0.612 8
-0.137 0.042 0.609 7
-0.096 0.183 0.542 10
-0.128 0.241 0.445 8
-0.177 0.257 0.381 9
-0.159 0.231 0.343 8
-0.125 0.218 0.34 9
-0.024 0.181 0.479 8
0.047 0.114 0.733 8
0.102 0.021 0.95 9
0.126 -0.048 1.076 8
0.082 -0.069 1.088 9
0.074 -0.062 0.979 8
-0.033 -0.079 0.883 7
-0.192 -0.062 0.713 10
-0.362 -0.025 0.536 8
-0.499 -0.035 0.423 9
-0.549 -0.092 0.411 8
-0.489 -0.165 0.442 8
-0.44 -0.149 0.398 9
-0.337 -0.192 0.445 8
-0.25 -0.211 0.49 9
-0.205 -0.197 0.492 8
-0.218 -0.156 0.423 8
-0.29 -0.12 0.269 9
-0.261 -0.108 0.242 6
-0.365 -0.035 0.019 11
-0.455 0.012 -0.252 8
-0.5 -0.027 -0.48 8
-0.498 0.004 -0.581 9
-0.336 0.046 -0.547 8
-0.015 -0.025 -0.438 8
-0.013 -0.022 -0.394 9
0.246 -0.102 -0.269 8
0.321 -0.141 -0.136 9
0.243 -0.146 -0.069 8
0.11 -0.154 -0.155 8
-0.036 -0.169 -0.328 7
-0.122 -0.188 -0.437 10
-0.11 -0.169 -0.394 9
-0.076 -0.149 -0.473 8
-0.01 -0.022 -0.631 8
0.051 0.096 -0.746 9
0.139 0.123 -0.698 8
0.181 0.159 -0.53 9
0.131 0.197 -0.313 8
0.118 0.177 -0.282 8
0.047 0.122 -0.065 9
0.009 -0.019 0.156 8
0.0 -0.112 0.293 7
0.034 -0.107 0.302 10
0.144 -0.051 0.265 8
0.129 -0.046 0.238 9
0.279 0.07 0.093 8
0.395 0.212 -0.16 8
0.46 0.303 -0.382 9
0.403 0.327 -0.426 8
0.201 0.315 -0.285 9
0.015 0.308 -0.095 8
0.014 0.277 -0.085 8
-0.098 0.227 -0.007 9
-0.135 0.045 -0.021 7
-0.038 -0.166 0.146 10
0.138 -0.283 0.394 8
0.264 -0.354 0.473 8
0.296 -0.393 0.382 9
0.266 -0.353 0.343 8
0.321 -0.266 0.136 9
0.288 -0.119 -0.072 8
0.089 -0.104 -0.184 8
-0.1 -0.049 -0.108 9
-0.229 0.014 0.136 8
-0.298 -0.104 0.377 9
-0.268 -0.093 0.339 6
-0.228 -0.229 0.531 10
-0.05 -0.273 0.631 9
0.127 -0.265 0.612 8
0.156 -0.252 0.493 9
0.058 -0.099 0.355 8
0.052 -0.089 0.319 8
-0.115 -0.068 0.119 9
-0.343 -0.299 0.009 8
-0.506 -0.4 0.251 9
-0.642 -0.326 0.498 8
-0.58 -0.237 0.428 8
-0.522 -0.213 0.385 7
-0.228 -0.171 0.12 10
0.08 -0.125 -0.152 8
0.444 -0.082 -0.35 9
0.694 -0.051 -0.392 8
0.672 -0.033 -0.229 9
0.441 -0.012 0.045 8
0.159 0.008 0.326 8
0.143 0.007 0.293 9
-0.088 0.011 0.468 8
-0.255 0.0 0.469 9
-0.346 -0.004 0.316 8
-0.329 0.038 0.01 7
-0.186 0.068 -0.386 10
-0.007 0.047 -0.664 8
-0.006 0.042 -0.598 9
0.112 0.044 -0.66 8
0.147 0.046 -0.505 8
0.104 0.02 -0.165 9
0.022 -0.014 0.192 8
# end
#Thu Feb 26 20:38:26 GMT+08:00 2015 
