# Supplementary material for: Abnormal Gait Behavior Detection for Elderly Based on Enhanced Wigner-Ville Analysis and Cloud Incremental SVM Learning
Source: Hindawi journal article supplement (doi:10.1155/2016/5869238), 2016-01-01
Supplement: f1 [file 5869238.f1.zip › Supplementary Materials/Original Data/Leftward fall Ending lying/original__115.txt]

# Accelerometer Values
# filename:  original__115.txt
# Saving start time: Thu Feb 26 20:38:30 GMT+08:00 2015

# sensor resolution: 0.0095825195m/s^2
#Sensorvendor: KIONIX, name: KX023 Accelerometer, type: 1,version : 1, range 39.240005

# X value, Y value, Z value, time diff in ms
0.109 0.141 -0.41 9
0.167 0.092 -0.235 8
0.15 0.083 -0.211 7
0.255 0.057 -0.021 10
0.308 -0.02 0.161 8
0.234 -0.105 0.295 9
0.116 -0.139 0.342 8
0.042 -0.132 0.301 8
0.004 -0.111 0.187 9
0.004 -0.1 0.168 8
-0.028 -0.082 0.035 9
-0.06 -0.066 -0.075 8
-0.05 -0.057 -0.172 8
0.011 -0.03 -0.216 9
0.01 -0.027 -0.195 6
0.141 0.0 -0.181 11
0.248 -0.018 -0.142 8
0.208 -0.06 -0.081 8
0.096 -0.068 -0.019 9
0.011 -0.027 0.012 8
-0.029 0.0 0.011 8
-0.034 -0.01 -0.005 9
-0.031 -0.009 -0.004 8
-0.019 -0.027 -0.018 9
-0.014 -0.042 -0.019 8
-0.02 -0.036 -0.004 8
-0.009 -0.04 0.016 7
0.052 -0.06 0.036 10
0.157 -0.059 0.078 9
0.141 -0.053 0.071 8
0.25 -0.051 0.128 8
0.325 -0.043 0.168 9
0.329 -0.032 0.215 8
0.241 -0.027 0.25 9
0.09 -0.034 0.242 8
-0.043 -0.032 0.19 8
-0.039 -0.029 0.171 9
-0.116 -0.015 0.075 8
-0.146 0.009 -0.024 7
-0.139 0.031 -0.109 10
-0.072 0.056 -0.173 8
-0.015 0.1 -0.196 9
-0.014 0.09 -0.176 8
-0.038 0.145 -0.156 9
-0.082 0.181 -0.118 8
-0.103 0.161 -0.093 8
-0.107 0.122 -0.068 9
-0.101 0.087 -0.012 8
-0.077 0.047 0.07 8
-0.069 0.042 0.063 9
-0.035 0.005 0.124 7
-0.004 -0.028 0.128 10
0.008 -0.049 0.082 8
-0.004 -0.025 0.016 8
-0.025 0.029 -0.042 9
-0.045 0.083 -0.088 8
-0.041 0.074 -0.079 9
-0.055 0.126 -0.1 8
-0.063 0.14 -0.087 8
-0.08 0.125 -0.049 9
-0.102 0.1 -0.011 8
-0.097 0.071 0.013 9
-0.087 0.064 0.012 6
-0.059 0.049 0.011 10
-0.035 0.032 -0.012 9
-0.015 0.052 -0.033 8
-0.007 0.111 -0.039 9
-0.013 0.152 -0.037 8
-0.024 0.16 -0.045 8
-0.022 0.144 -0.04 9
-0.04 0.137 -0.069 8
-0.083 0.135 -0.109 8
-0.13 0.132 -0.156 9
-0.127 0.126 -0.218 8
-0.078 0.116 -0.257 7
-0.032 0.099 -0.237 10
-0.028 0.089 -0.214 8
-0.005 0.048 -0.104 9
-0.034 -0.009 0.055 8
-0.141 -0.058 0.194 9
-0.249 -0.098 0.272 8
-0.257 -0.128 0.239 8
-0.199 -0.116 0.135 9
-0.179 -0.104 0.122 8
-0.11 -0.042 0.007 9
-0.041 0.022 -0.107 8
0.025 0.043 -0.21 7
0.072 0.026 -0.248 10
0.065 0.0 -0.215 8
0.058 -0.049 -0.159 9
0.053 -0.044 -0.143 8
-0.113 -0.097 -0.102 8
-0.222 -0.125 -0.097 9
-0.309 -0.116 -0.17 8
-0.38 -0.074 -0.359 9
-0.437 -0.041 -0.606 8
-0.394 -0.036 -0.546 8
-0.45 -0.023 -0.734 9
-0.488 -0.053 -0.879 6
-0.469 -0.13 -1.013 10
-0.479 -0.135 -1.198 9
-0.509 -0.157 -1.372 8
-0.419 -0.311 -1.45 9
-0.377 -0.28 -1.305 8
-0.091 -0.447 -1.47 8
0.372 -0.548 -1.663 9
0.84 -0.575 -1.817 8
1.213 -0.654 -1.846 9
1.457 -0.865 -1.685 8
1.523 -1.09 -1.513 8
1.371 -0.981 -1.361 7
1.277 -1.218 -1.262 10
1.119 -1.413 -1.112 9
0.947 -1.526 -0.969 8
0.703 -1.643 -0.898 8
0.448 -1.705 -0.896 9
0.403 -1.534 -0.806 8
0.297 -1.487 -0.887 9
0.311 -1.375 -1.055 8
0.332 -1.286 -1.305 8
0.355 -1.216 -1.539 9
0.292 -1.145 -1.768 8
0.263 -1.03 -1.591 7
0.062 -0.976 -1.8 10
-0.226 -0.925 -1.805 8
-0.479 -0.878 -1.513 9
-0.662 -0.825 -1.035 8
-0.88 -0.833 -0.621 8
-1.063 -0.873 -0.404 9
-1.097 -0.734 -0.334 8
-0.987 -0.661 -0.301 9
-0.728 -0.335 -0.235 8
-0.205 -0.022 -0.145 8
0.363 0.217 -0.107 9
0.946 0.359 -0.1 7
1.435 0.317 -0.124 10
1.705 0.136 -0.223 8
1.534 0.123 -0.201 8
1.439 -0.033 -0.371 9
0.933 -0.035 -0.461 8
0.384 0.088 -0.34 9
0.064 0.399 0.043 8
0.103 0.893 0.668 8
0.093 0.803 0.601 9
0.637 1.215 0.541 8
1.553 1.402 1.764 9
2.5 1.419 1.946 6
3.125 1.343 2.062 10
3.14 1.226 2.311 9
2.457 1.245 2.828 8
2.211 1.121 2.545 8
1.353 1.236 3.311 9
0.84 1.301 3.976 8
0.824 1.413 4.429 9
1.267 1.609 4.658 8
1.823 1.838 4.771 8
2.214 2.011 5.076 9
1.993 1.81 4.568 8
2.037 1.952 5.224 7
1.672 2.06 5.938 10
1.022 2.205 6.39 8
0.317 2.412 6.348 9
-0.144 2.613 5.736 8
-0.206 2.71 4.846 9
-0.185 2.439 4.362 8
0.025 2.398 3.609 8
0.181 2.273 3.177 9
0.129 2.136 3.182 8
0.073 1.95 3.425 9
0.09 1.664 3.529 8
0.081 1.497 3.176 7
-0.116 1.107 2.845 10
-0.528 0.69 1.795 8
-1.009 0.55 0.069 9
-1.098 0.469 -1.804 8
-0.569 0.032 -3.363 8
0.002 -0.293 -4.316 9
0.002 -0.264 -3.884 8
0.434 -0.186 -3.794 8
0.871 -0.259 -2.846 9
1.286 -0.833 -1.655 8
1.577 -1.661 -0.509 9
1.616 -2.272 0.261 6
1.355 -2.515 0.359 10
1.219 -2.264 0.323 9
0.726 -2.281 -0.35 8
0.085 -2.113 -1.583 9
-0.647 -1.877 -2.713 8
-1.377 -1.649 -3.01 8
-1.807 -1.476 -2.377 9
-1.68 -1.391 -1.113 8
-1.512 -1.251 -1.002 9
-0.797 -1.276 0.56 8
0.348 -1.441 1.882 8
1.543 -1.762 2.428 7
2.316 -2.104 2.07 10
2.339 -2.278 0.94 9
2.105 -2.05 0.846 8
1.438 -2.067 -0.725 8
0.255 -1.871 -2.236 9
-1.176 -1.25 -3.136 8
-2.22 -0.46 -3.286 8
-2.302 -0.058 -2.962 9
-1.582 -0.035 -2.264 8
-1.424 -0.032 -2.037 9
-0.384 -0.106 -1.101 8
0.54 -0.213 -0.176 7
1.003 -0.297 0.494 10
0.823 -0.291 0.784 8
-0.021 -0.186 0.628 9
-1.241 0.083 0.026 8
-1.116 0.075 0.023 8
-2.276 0.489 -0.835 9
-2.857 0.957 -1.771 8
-2.557 1.293 -2.666 9
-1.654 1.46 -3.351 8
-0.578 1.466 -3.723 8
0.324 1.505 -3.618 9
0.291 1.354 -3.256 6
0.357 1.464 -2.771 11
-0.374 1.343 -1.877 8
-1.431 1.194 -0.78 8
-2.671 1.305 0.125 9
-3.631 1.605 0.86 8
-3.268 1.444 1.322 9
-3.313 1.3 1.189 8
-2.464 1.052 1.292 8
-1.406 0.737 1.092 9
-0.508 0.453 0.639 8
-0.021 0.295 -0.007 9
-0.019 0.265 -0.006 6
0.003 0.257 -0.752 10
-0.219 0.23 -1.492 9
-0.563 0.222 -2.113 8
-0.901 0.12 -2.565 8
-1.161 -0.082 -2.626 9
-1.358 -0.201 -2.177 8
-1.369 -0.269 -1.44 9
-1.232 -0.242 -1.296 8
-0.904 -0.302 -0.645 8
-0.325 -0.349 -0.276 9
0.187 -0.4 -0.129 8
0.54 -0.463 0.112 7
0.766 -0.537 0.589 10
0.838 -0.553 1.072 8
0.754 -0.498 0.965 9
0.698 -0.435 1.198 8
0.619 -0.412 1.226 9
0.551 -0.516 1.313 8
0.454 -0.669 1.4 8
0.448 -0.741 1.332 9
0.403 -0.726 1.124 8
0.362 -0.654 1.012 8
0.994 -0.595 0.737 9
1.269 -0.338 0.511 7
1.508 0.072 0.345 10
1.581 0.444 0.073 8
1.63 0.768 -0.311 8
1.467 0.691 -0.28 9
1.491 0.918 -0.731 8
1.59 0.914 -0.986 9
1.914 0.508 -0.819 8
1.946 -0.017 -0.634 8
1.497 -0.151 -0.563 9
1.206 0.0 -0.308 8
1.086 0.0 -0.277 9
1.182 0.28 0.056 6
1.324 0.581 0.096 10
1.508 0.889 -0.205 9
1.643 1.22 -0.644 8
1.424 1.42 -1.144 9
0.823 1.535 -1.513 8
0.74 1.382 -1.361 8
-0.053 1.505 -1.413 9
-0.651 1.414 -1.055 8
-0.747 0.884 -0.43 9
-0.513 0.225 0.325 8
-0.059 -0.274 1.11 8
-0.053 -0.246 0.999 7
0.614 -0.601 1.602 10
1.235 -0.837 1.855 8
1.63 -0.856 1.692 9
1.78 -0.61 1.181 8
1.75 -0.28 0.515 9
1.55 0.003 -0.182 8
1.395 0.003 -0.163 8
1.071 0.254 -0.727 9
0.833 0.269 -1.097 8
0.67 0.14 -1.4 9
0.38 0.132 -1.543 8
0.005 0.073 -1.461 7
-0.386 -0.048 -1.194 10
-0.347 -0.043 -1.075 8
-0.738 -0.151 -0.697 9
-1.0 -0.277 -0.405 8
-0.969 -0.366 -0.358 8
-0.661 -0.316 -0.435 9
-0.271 -0.195 -0.518 8
0.069 -0.184 -0.633 9
0.062 -0.165 -0.57 8
0.249 -0.21 -0.449 8
0.176 -0.137 -0.029 9
-0.152 -0.014 0.335 6
-0.626 0.082 0.564 11
-1.133 0.158 0.641 8
-1.02 0.143 0.585 8
-1.479 0.128 0.526 9
-1.668 0.218 0.308 8
-1.501 0.202 -0.082 8
-1.191 0.187 -0.456 9
-0.928 0.187 -0.728 8
-0.77 0.094 -0.789 9
-0.693 0.084 -0.71 8
-0.698 -0.066 -0.393 8
-0.827 -0.232 0.107 7
-0.887 -0.39 0.605 10
-0.69 -0.466 0.999 9
-0.357 -0.481 1.163 8
-0.077 -0.463 1.166 8
-0.069 -0.417 1.05 9
0.226 -0.326 0.95 8
0.593 -0.117 0.752 9
0.868 0.116 0.499 8
0.879 0.263 0.301 8
0.618 0.304 0.241 9
0.236 0.278 0.308 8
0.212 0.25 0.277 7
-0.101 0.18 0.366 10
-0.271 0.123 0.377 8
-0.286 0.145 0.231 9
-0.161 0.196 -0.108 8
0.034 0.279 -0.451 8
0.03 0.251 -0.406 9
0.123 0.342 -0.366 8
0.05 0.372 -0.816 9
-0.044 0.382 -0.843 8
-0.082 0.387 -0.834 8
-0.098 0.355 -0.834 9
-0.088 0.32 -0.75 7
-0.112 0.261 -0.716 10
-0.124 0.187 -0.565 8
-0.107 0.09 -0.35 8
-0.048 -0.058 -0.185 9
0.001 -0.229 -0.073 8
0.007 -0.388 0.029 9
0.075 -0.487 0.094 8
0.068 -0.438 0.085 8
0.218 -0.44 0.074 9
0.359 -0.38 0.033 8
0.455 -0.303 0.007 9
0.428 -0.215 -0.008 6
0.27 -0.16 -0.007 10
0.082 -0.184 0.028 9
0.073 -0.166 0.025 8
-0.07 -0.247 0.097 9
-0.126 -0.334 0.173 8
-0.094 -0.378 0.222 8
-0.004 -0.369 0.246 9
0.126 -0.318 0.225 8
0.304 -0.257 0.154 8
0.273 -0.231 0.138 9
0.425 -0.167 0.089 8
0.429 -0.094 0.115 7
0.291 -0.02 0.247 10
0.139 -0.009 0.388 8
0.017 -0.05 0.457 9
0.016 -0.045 0.411 8
-0.109 -0.061 0.449 9
-0.227 -0.056 0.458 8
-0.292 -0.036 0.436 8
-0.299 -0.014 0.368 9
-0.254 0.018 0.208 8
-0.108 0.096 -0.018 9
-0.097 0.087 -0.016 8
0.092 0.179 -0.212 7
0.164 0.235 -0.324 10
0.069 0.251 -0.325 8
-0.108 0.244 -0.197 9
-0.269 0.191 -0.053 8
-0.376 0.062 0.045 8
-0.339 0.056 0.041 9
-0.386 -0.051 0.144 8
-0.357 -0.091 0.2 8
-0.278 -0.099 0.171 9
-0.176 -0.111 0.093 8
-0.037 -0.132 -0.031 9
-0.034 -0.119 -0.028 6
0.138 -0.124 -0.182 10
0.242 -0.076 -0.292 9
0.193 -0.025 -0.324 8
0.049 -0.046 -0.235 9
-0.093 -0.116 0.001 8
-0.185 -0.192 0.28 8
-0.166 -0.172 0.252 9
-0.192 -0.215 0.457 8
-0.163 -0.234 0.556 9
-0.105 -0.247 0.576 8
-0.035 -0.243 0.516 8
0.005 -0.21 0.362 7
-0.002 -0.165 0.14 10
-0.002 -0.148 0.126 9
-0.039 -0.094 -0.141 8
-0.095 -0.04 -0.366 8
-0.158 -0.008 -0.479 9
-0.206 0.02 -0.51 8
-0.216 0.043 -0.487 9
-0.171 0.053 -0.427 8
-0.154 0.048 -0.384 8
-0.065 0.06 -0.28 9
0.041 0.048 -0.157 8
0.123 0.057 -0.069 7
0.124 0.134 -0.02 10
0.056 0.241 0.015 8
-0.07 0.29 -0.061 9
-0.063 0.261 -0.055 8
-0.233 0.222 -0.185 8
-0.369 0.163 -0.152 9
-0.39 0.13 -0.041 8
-0.25 0.108 0.049 9
-0.06 0.076 0.134 8
-0.054 0.068 0.12 8
0.057 0.041 0.184 9
0.087 0.03 0.224 7
0.057 0.013 0.235 10
-0.024 -0.033 0.229 8
-0.094 -0.09 0.204 8
-0.095 -0.113 0.177 9
-0.085 -0.102 0.159 8
-0.084 -0.087 0.182 9
-0.122 -0.093 0.253 8
-0.158 -0.108 0.349 8
-0.182 -0.088 0.413 9
-0.137 -0.029 0.413 8
-0.013 0.046 0.325 9
-0.012 0.042 0.292 6
0.09 0.096 0.137 10
0.137 0.146 -0.039 9
0.126 0.181 -0.214 8
0.046 0.161 -0.326 9
-0.068 0.086 -0.29 8
-0.171 -0.009 -0.123 8
-0.154 -0.008 -0.111 9
-0.21 -0.105 0.088 8
-0.217 -0.193 0.252 8
-0.17 -0.23 0.329 9
-0.03 -0.222 0.298 8
-0.027 -0.199 0.268 7
0.123 -0.168 0.15 10
0.197 -0.126 0.135 8
0.199 -0.063 -0.282 9
0.171 0.042 -0.456 8
0.124 0.125 -0.514 9
0.023 0.115 -0.483 8
-0.11 0.044 -0.314 8
-0.099 0.039 -0.283 9
-0.238 -0.025 -0.054 8
-0.3 -0.084 0.087 9
-0.229 -0.133 0.237 8
-0.087 -0.125 0.343 7
0.065 -0.067 0.3 10
0.174 0.012 0.154 8
0.156 0.011 0.139 9
0.189 0.129 -0.056 8
0.161 0.255 -0.233 8
0.104 0.318 -0.333 9
0.048 0.325 -0.341 8
0.027 0.318 -0.311 8
0.046 0.307 -0.326 9
0.042 0.276 -0.293 8
0.131 0.357 -0.244 9
0.159 0.423 -0.225 6
0.122 0.197 -0.331 10
0.193 -0.084 -0.329 9
0.291 -0.238 -0.216 8
0.262 -0.214 -0.134 9
0.232 -0.288 -0.12 8
0.234 -0.233 0.159 8
0.213 -0.128 0.534 9
0.024 -0.12 0.818 8
-0.28 -0.107 0.925 9
-0.394 -0.108 0.769 8
-0.354 -0.097 0.692 8
-0.165 -0.085 0.544 7
0.146 0.049 0.414 10
0.583 0.149 0.363 9
0.899 0.205 0.459 8
0.974 0.233 0.62 8
0.783 0.252 0.675 9
0.705 0.227 0.608 8
0.343 0.263 0.447 8
0.045 0.338 0.074 9
-0.044 0.399 -0.416 8
0.02 0.416 -0.809 9
0.118 0.451 -0.936 8
0.106 0.406 -0.843 7
0.321 0.407 -0.776 10
0.585 0.309 -0.563 8
0.812 0.184 -0.255 9
0.985 0.127 -0.007 8
# end
#Thu Feb 26 20:38:34 GMT+08:00 20153
