# Supplementary material for: Abnormal Gait Behavior Detection for Elderly Based on Enhanced Wigner-Ville Analysis and Cloud Incremental SVM Learning
Source: Hindawi journal article supplement (doi:10.1155/2016/5869238), 2016-01-01
Supplement: f1 [file 5869238.f1.zip › Supplementary Materials/Original Data/Leftward fall Ending lying/original__116.txt]

# Accelerometer Values
# filename:  original__116.txt
# Saving start time: Thu Feb 26 20:38:37 GMT+08:00 2015

# sensor resolution: 0.0095825195m/s^2
#Sensorvendor: KIONIX, name: KX023 Accelerometer, type: 1,version : 1, range 39.240005

# X value, Y value, Z value, time diff in ms
0.097 -0.013 -0.097 8
0.206 -0.012 -0.098 9
0.253 -0.002 -0.049 8
0.242 -0.018 0.022 9
0.189 -0.052 0.102 8
0.128 -0.062 0.155 8
0.078 -0.054 0.195 9
0.07 -0.049 0.176 7
0.007 -0.041 0.207 10
-0.073 -0.041 0.194 8
-0.129 -0.049 0.138 8
-0.144 -0.058 0.053 9
-0.11 -0.072 -0.028 8
-0.051 -0.098 -0.078 9
-0.045 -0.089 -0.07 8
0.002 -0.116 -0.064 8
0.035 -0.125 -0.036 9
0.052 -0.152 -0.001 8
0.052 -0.194 0.036 9
0.047 -0.175 0.032 6
0.05 -0.185 0.069 10
0.069 -0.186 0.09 9
0.066 -0.215 0.081 8
0.01 -0.251 0.075 9
-0.099 -0.265 0.086 8
-0.223 -0.238 0.104 8
-0.262 -0.197 0.1 9
-0.236 -0.178 0.09 8
-0.175 -0.125 0.045 8
-0.061 -0.05 -0.021 9
0.079 0.029 -0.092 8
0.195 0.121 -0.159 7
0.234 0.175 -0.205 10
0.188 0.152 -0.198 8
0.169 0.137 -0.178 9
0.104 0.094 -0.128 8
0.098 0.052 -0.04 9
0.137 0.011 0.054 8
0.168 -0.023 0.133 8
0.18 -0.047 0.199 9
0.201 -0.03 0.224 8
0.181 -0.027 0.202 9
0.23 0.001 0.166 8
0.255 0.006 0.088 7
0.211 0.005 0.01 10
0.107 0.008 -0.05 8
-0.005 0.011 -0.09 9
-0.004 0.01 -0.081 8
-0.086 0.012 -0.111 8
-0.112 0.002 -0.134 9
-0.106 0.0 -0.142 8
-0.091 0.006 -0.129 8
-0.055 0.013 -0.111 9
-0.013 0.013 -0.084 8
-0.011 0.012 -0.076 9
0.009 0.0 -0.035 6
0.008 -0.017 0.0 10
0.029 -0.016 0.025 9
0.066 -0.008 0.033 8
0.074 0.007 0.02 9
0.054 0.033 -0.002 8
0.049 0.03 -0.001 8
0.02 0.062 -0.018 9
-0.018 0.085 -0.023 8
-0.074 0.107 -0.027 9
-0.121 0.158 -0.036 8
-0.14 0.194 -0.059 8
-0.126 0.175 -0.053 7
-0.134 0.166 -0.093 10
-0.138 0.131 -0.124 9
-0.139 0.122 -0.126 8
-0.133 0.135 -0.079 8
-0.175 0.107 0.06 9
-0.298 0.036 0.238 8
-0.269 0.032 0.215 9
-0.394 -0.019 0.335 8
-0.462 -0.009 0.34 8
-0.489 0.048 0.214 9
-0.497 0.105 0.014 8
-0.542 0.134 -0.197 7
-0.663 0.132 -0.44 10
-0.597 0.119 -0.396 8
-0.741 0.075 -0.666 9
-0.844 0.0 -0.883 8
-0.879 -0.068 -1.053 8
-0.805 -0.096 -1.259 9
-0.545 -0.14 -1.456 8
-0.263 -0.109 -1.64 9
-0.237 -0.098 -1.476 8
-0.044 -0.018 -1.581 8
0.145 -0.122 -1.471 9
0.343 -0.314 -1.277 7
0.631 -0.353 -1.035 10
0.735 -0.469 -1.036 8
0.661 -0.422 -0.933 8
0.544 -0.633 -1.151 9
0.365 -0.626 -1.253 8
0.227 -0.556 -1.37 9
0.199 -0.548 -1.594 8
0.221 -0.596 -1.816 8
0.335 -0.692 -1.809 9
0.301 -0.622 -1.628 8
0.478 -0.785 -1.397 8
0.656 -0.978 -1.159 7
0.736 -1.144 -1.081 10
0.714 -1.348 -1.157 9
0.678 -1.591 -1.249 8
0.691 -1.755 -1.26 8
0.622 -1.58 -1.134 9
0.727 -1.603 -1.108 8
0.899 -1.5 -1.035 9
1.023 -1.417 -0.887 8
1.04 -1.393 -0.665 8
0.984 -1.396 -0.502 9
0.828 -1.42 -0.484 8
0.745 -1.278 -0.436 7
0.497 -1.332 -0.419 10
0.222 -1.356 -0.336 8
-0.02 -1.308 -0.273 9
-0.199 -1.191 -0.278 8
-0.3 -0.993 -0.33 9
-0.27 -0.894 -0.297 8
-0.31 -0.656 -0.363 8
-0.294 -0.394 -0.455 9
-0.233 -0.13 -0.522 8
-0.052 0.151 -0.448 9
0.281 0.305 -0.205 8
0.253 0.274 -0.184 7
0.574 0.292 0.271 10
0.771 0.35 0.796 8
0.835 0.453 1.137 8
0.787 0.563 1.321 9
0.772 0.678 1.511 8
0.938 0.83 1.807 9
1.29 0.929 2.04 8
1.161 0.836 1.836 8
1.584 0.866 1.908 9
1.64 0.928 1.931 8
1.27 1.123 2.23 9
0.877 1.353 2.772 6
0.658 1.566 3.164 10
0.637 1.77 3.401 9
0.573 1.593 3.061 8
0.645 1.8 3.265 9
0.783 2.037 3.401 8
0.954 2.21 3.438 8
0.934 2.274 3.432 9
0.696 2.209 3.554 8
0.626 1.988 3.199 9
0.335 1.837 3.588 8
0.034 1.708 4.234 8
-0.293 1.66 4.956 7
-0.513 1.757 5.477 10
-0.41 2.003 5.586 9
-0.108 2.286 5.229 8
-0.097 2.057 4.706 8
0.195 2.274 4.083 9
0.364 2.284 3.471 8
0.306 2.043 3.153 8
0.019 1.609 3.114 9
-0.428 1.063 3.14 8
-0.898 0.5 2.974 9
-0.808 0.45 2.677 8
-1.123 0.025 2.116 7
-1.198 -0.234 1.077 10
-1.152 -0.414 -0.226 8
-1.171 -0.556 -1.358 9
-1.323 -0.668 -2.091 8
-1.561 -0.638 -2.377 8
-1.405 -0.574 -2.139 9
-1.344 -0.469 -1.924 8
-0.568 -0.67 -1.652 9
0.625 -0.987 -1.701 8
1.715 -1.174 -1.791 8
2.338 -1.386 -1.752 9
2.104 -1.247 -1.576 6
2.064 -1.452 -1.515 11
1.435 -1.616 -1.567 8
0.465 -1.66 -1.91 8
-0.422 -1.352 -2.453 9
-1.285 -0.877 -3.284 8
-2.139 -0.142 -4.093 8
-1.925 -0.128 -3.684 9
-2.115 0.921 -3.515 8
-1.328 1.32 -2.502 9
0.075 0.676 -1.334 8
1.449 -0.477 0.075 8
2.267 -1.669 1.537 7
2.281 -2.486 2.546 10
2.053 -2.237 2.291 9
1.45 -2.521 2.704 8
0.784 -2.453 2.389 8
0.442 -2.101 1.332 9
0.428 -1.411 -0.07 8
0.676 -0.625 -1.453 9
0.99 -0.087 -2.63 8
0.891 -0.078 -2.367 8
1.196 0.08 -3.072 9
1.361 -0.13 -2.923 8
1.122 -0.609 -2.066 7
0.386 -1.126 -1.054 10
-0.771 -1.415 -0.103 8
-0.694 -1.274 0.716 9
-1.838 -1.146 0.644 8
-2.235 -1.129 1.069 8
-1.716 -0.808 0.86 9
-0.674 -0.295 0.034 8
0.348 0.366 -1.32 9
1.238 1.018 -2.745 8
1.114 0.916 -2.47 8
1.894 1.105 -3.569 9
1.975 0.853 -4.256 7
0.937 0.826 -4.161 10
-0.758 0.843 -2.921 8
-2.609 0.686 -0.988 8
-4.299 0.802 0.757 9
-3.869 0.722 0.682 8
-4.931 1.203 1.879 9
-4.94 1.673 2.558 8
-3.943 1.84 2.553 8
-2.558 1.863 1.902 9
-1.32 1.836 0.982 8
-0.421 1.674 0.083 9
-0.379 1.507 0.074 6
0.275 1.35 -0.443 10
0.836 1.174 -0.511 9
1.354 0.803 -0.495 8
1.759 0.364 -0.622 9
1.972 0.08 -0.823 8
1.775 0.072 -0.741 8
1.629 -0.055 -0.961 9
0.895 -0.105 -1.146 8
-0.146 -0.106 -1.099 9
-1.02 -0.046 -0.83 8
-1.405 0.046 -0.647 8
-1.265 0.042 -0.583 7
-1.055 0.067 -0.609 10
-0.319 -0.028 -0.741 8
0.746 -0.012 -0.795 9
1.747 0.078 -0.853 8
2.267 0.021 -1.156 9
2.198 0.005 -1.559 8
1.79 0.004 -1.891 8
1.611 0.003 -1.702 9
1.231 -0.044 -1.861 8
0.996 -0.056 -1.678 9
0.926 -0.059 -1.254 8
0.969 0.044 -0.796 7
1.325 0.298 -0.223 10
1.192 0.268 -0.2 8
2.069 0.341 0.612 9
3.021 0.036 1.216 8
3.595 -0.283 1.5 8
3.744 -0.322 1.717 9
3.486 -0.046 1.788 8
2.876 0.372 1.738 8
2.589 0.335 1.564 9
1.873 0.671 1.314 8
1.128 0.989 0.583 9
0.383 1.226 -0.62 6
-0.307 1.275 -1.992 10
-1.006 1.482 -3.086 9
-1.628 1.94 -3.444 8
-1.465 1.746 -3.1 9
-1.988 2.275 -2.481 8
-2.361 2.528 -1.216 8
-2.273 1.921 -0.041 9
-1.749 0.715 0.92 8
-1.241 -0.23 1.871 9
-0.914 -0.847 2.561 8
-0.823 -0.762 2.305 8
-0.456 -1.217 2.297 7
0.0 -1.466 1.519 10
0.305 -1.524 0.324 9
0.236 -1.393 -0.755 8
-0.1 -1.211 -1.498 8
-0.09 -1.089 -1.348 9
-0.437 -0.953 -1.807 8
-0.735 -0.842 -1.97 9
-0.877 -0.739 -1.916 8
-0.762 -0.634 -1.792 8
-0.559 -0.442 -1.684 9
-0.425 -0.131 -1.455 8
-0.383 -0.118 -1.31 7
-0.374 0.159 -0.825 10
-0.452 0.282 -0.11 8
-0.53 0.267 0.603 9
-0.542 0.181 0.976 8
-0.448 0.108 0.739 8
-0.288 0.128 0.071 9
-0.259 0.115 0.064 8
-0.108 0.283 -0.545 9
-0.036 0.526 -0.87 8
-0.131 0.67 -0.99 8
-0.407 0.631 -0.966 9
-0.366 0.568 -0.869 7
-0.84 0.305 -0.274 10
-0.756 0.275 -0.246 8
-0.723 0.105 -0.021 8
-0.521 -0.061 -0.062 9
-0.287 -0.138 -0.093 8
-0.161 -0.114 0.146 9
-0.009 -0.086 0.564 8
-0.008 -0.078 0.507 8
0.221 -0.098 0.926 9
0.48 -0.13 1.261 8
0.726 -0.114 1.494 9
0.837 -0.053 1.562 6
0.798 0.002 1.351 10
0.67 0.035 0.939 9
0.603 0.032 0.845 8
0.393 0.061 0.546 8
0.154 0.084 0.549 9
-0.028 0.043 0.765 8
-0.094 -0.065 0.977 9
0.01 -0.189 1.084 8
0.271 -0.276 1.081 8
0.244 -0.249 0.973 9
0.575 -0.252 0.848 8
0.764 -0.167 0.525 7
0.709 -0.097 0.134 10
0.414 -0.061 -0.103 8
0.019 -0.008 -0.181 9
-0.253 -0.02 -0.065 8
-0.228 -0.018 -0.058 9
-0.315 -0.096 0.175 8
-0.264 -0.144 0.337 8
-0.167 -0.186 0.445 9
-0.039 -0.283 0.513 8
0.024 -0.396 0.521 9
0.022 -0.357 0.468 8
-0.036 -0.354 0.433 7
-0.131 -0.214 0.285 10
-0.205 -0.062 -0.036 8
-0.258 0.027 -0.336 9
-0.318 0.106 -0.464 8
-0.35 0.161 -0.497 8
-0.315 0.145 -0.447 9
-0.271 0.14 -0.341 8
-0.178 0.108 -0.101 8
-0.079 0.069 0.113 9
-0.005 0.021 0.202 8
0.019 -0.028 0.194 9
0.017 -0.025 0.174 6
-0.009 -0.053 0.076 10
-0.063 -0.062 -0.147 9
-0.162 -0.035 -0.311 8
-0.282 0.014 -0.342 9
-0.323 0.02 -0.353 8
-0.274 -0.011 -0.314 8
-0.161 -0.05 -0.227 9
-0.144 -0.045 -0.204 8
-0.006 -0.086 -0.164 9
0.087 -0.122 -0.144 8
0.108 -0.142 -0.076 8
0.074 -0.143 -0.02 7
0.029 -0.149 -0.059 10
0.026 -0.134 -0.053 9
0.005 -0.105 -0.126 8
0.006 -0.034 -0.172 8
0.025 0.041 -0.2 9
0.055 0.115 -0.209 8
0.083 0.175 -0.209 8
0.113 0.207 -0.213 9
0.102 0.186 -0.192 8
0.165 0.19 -0.198 9
0.253 0.172 -0.203 8
0.304 0.151 -0.207 7
0.294 0.13 -0.178 10
0.225 0.105 -0.108 8
0.116 0.061 0.027 9
0.104 0.055 0.024 8
-0.006 -0.011 0.242 8
-0.113 -0.064 0.418 9
-0.185 -0.118 0.442 8
-0.171 -0.165 0.264 9
-0.076 -0.167 -0.003 8
-0.068 -0.14 -0.243 8
-0.061 -0.126 -0.218 9
0.223 -0.073 -0.399 6
0.222 0.005 -0.468 11
0.117 0.058 -0.4 8
-0.015 0.06 -0.251 8
-0.175 0.012 -0.105 9
-0.157 0.011 -0.094 8
-0.289 -0.041 0.093 9
-0.297 -0.077 0.266 8
-0.173 -0.095 0.281 8
0.002 -0.117 0.14 9
0.12 -0.117 0.012 8
0.13 -0.052 -0.013 8
0.117 -0.047 -0.012 7
0.066 0.003 0.029 10
-0.021 -0.024 0.155 9
-0.137 -0.106 0.308 8
-0.228 -0.195 0.375 8
-0.264 -0.264 0.34 9
-0.252 -0.286 0.174 8
-0.227 -0.258 0.157 9
-0.126 -0.231 -0.056 8
0.004 -0.129 -0.169 8
0.053 -0.031 -0.175 9
0.022 -0.057 -0.102 8
0.02 -0.051 -0.092 7
-0.11 -0.18 0.216 10
-0.099 -0.162 0.194 8
-0.078 -0.102 0.23 9
-0.014 -0.021 0.124 8
0.049 0.041 -0.048 9
0.145 0.073 -0.204 8
0.271 0.097 -0.324 8
0.244 0.087 -0.291 9
0.269 0.191 -0.318 8
0.152 0.326 -0.27 8
-0.02 0.383 -0.214 9
-0.195 0.37 -0.103 7
-0.283 0.319 0.11 10
-0.221 0.557 0.391 8
-0.199 0.502 0.352 8
-0.087 0.668 0.362 9
0.14 0.291 0.093 8
0.429 -0.171 -0.121 9
0.42 -0.459 -0.239 8
0.074 -0.567 -0.155 8
-0.413 -0.484 0.192 9
-0.371 -0.435 0.173 8
-0.74 -0.378 0.571 9
-0.831 -0.493 0.863 6
-0.763 -0.545 1.103 10
-0.499 -0.518 1.139 9
-0.08 -0.47 0.893 8
0.279 -0.358 0.491 9
0.251 -0.322 0.441 8
0.511 -0.122 -0.053 8
0.617 0.136 -0.43 9
0.522 0.327 -0.491 8
0.345 0.453 -0.279 9
0.217 0.492 0.025 8
0.195 0.442 0.022 8
0.115 0.38 0.258 7
0.064 0.304 0.368 10
0.079 0.285 0.243 8
0.273 0.243 -0.13 9
0.612 0.2 -0.555 8
0.863 0.224 -0.93 9
0.777 0.202 -0.837 8
0.872 0.245 -1.116 8
# end
#Thu Feb 26 20:38:41 GMT+08:00 20150
