# Supplementary material for: Abnormal Gait Behavior Detection for Elderly Based on Enhanced Wigner-Ville Analysis and Cloud Incremental SVM Learning
Source: Hindawi journal article supplement (doi:10.1155/2016/5869238), 2016-01-01
Supplement: f1 [file 5869238.f1.zip › Supplementary Materials/Original Data/Leftward fall Ending lying/original__117.txt]

# Accelerometer Values
# filename:  original__117.txt
# Saving start time: Thu Feb 26 20:38:56 GMT+08:00 2015

# sensor resolution: 0.0095825195m/s^2
#Sensorvendor: KIONIX, name: KX023 Accelerometer, type: 1,version : 1, range 39.240005

# X value, Y value, Z value, time diff in ms
-0.18 -0.009 0.102 8
-0.022 0.012 -0.025 9
0.119 0.033 -0.131 8
0.231 0.05 -0.198 8
0.309 0.057 -0.228 9
0.333 0.055 -0.223 8
0.3 0.049 -0.201 8
0.254 0.032 -0.161 9
0.171 -0.004 -0.115 8
0.08 -0.06 -0.071 9
-0.034 -0.114 -0.026 6
-0.158 -0.149 0.011 10
-0.228 -0.168 0.043 9
-0.205 -0.151 0.039 8
-0.208 -0.17 0.066 9
-0.181 -0.204 0.096 8
-0.161 -0.24 0.136 8
-0.16 -0.257 0.155 9
-0.16 -0.268 0.124 8
-0.186 -0.269 0.048 9
-0.167 -0.242 0.043 8
-0.223 -0.226 -0.078 8
-0.256 -0.207 -0.239 7
-0.262 -0.188 -0.373 10
-0.25 -0.172 -0.406 9
-0.229 -0.183 -0.337 8
-0.206 -0.164 -0.223 8
-0.192 -0.148 -0.2 9
-0.201 -0.235 -0.078 8
-0.257 -0.302 -0.012 8
-0.308 -0.404 -0.118 9
-0.286 -0.459 -0.388 8
-0.222 -0.412 -0.652 9
-0.2 -0.371 -0.586 8
-0.145 -0.185 -0.811 7
-0.11 0.117 -0.969 10
-0.061 0.355 -0.985 8
0.101 0.395 -0.836 9
0.574 -0.008 -0.63 8
1.106 -0.443 -0.577 8
0.995 -0.399 -0.52 9
1.252 -0.407 -0.806 8
1.156 -0.312 -1.302 9
0.838 -0.276 -1.564 8
0.512 -0.274 -1.417 8
0.193 -0.266 -1.087 9
0.174 -0.24 -0.978 6
-0.091 -0.255 -0.731 11
-0.279 -0.313 -0.591 8
-0.335 -0.401 -0.501 8
-0.203 -0.544 -0.439 9
0.072 -0.738 -0.448 8
0.346 -0.939 -0.57 9
0.311 -0.845 -0.513 8
0.517 -1.107 -0.462 8
0.596 -1.381 -0.88 9
0.519 -1.537 -1.078 8
0.37 -1.542 -1.283 9
0.262 -1.481 -1.392 6
0.247 -1.424 -1.328 10
0.223 -1.282 -1.195 9
0.307 -1.274 -1.033 8
0.421 -1.345 -0.81 8
0.492 -1.445 -0.546 9
0.557 -1.467 -0.282 8
0.635 -1.397 -0.096 9
0.63 -1.146 -0.087 8
0.567 -1.031 -0.078 8
0.42 -0.668 -0.206 9
0.11 -0.448 -0.416 8
-0.151 -0.338 -0.56 7
-0.184 -0.257 -0.65 10
-0.159 -0.287 -0.989 8
-0.22 -0.235 -1.257 9
-0.198 -0.212 -1.131 8
-0.274 -0.004 -0.755 9
-0.234 0.154 -0.034 8
0.03 0.229 0.662 8
0.377 0.421 1.343 9
0.602 0.745 1.776 8
0.542 0.671 1.895 9
0.847 0.604 1.705 8
1.21 1.26 1.717 7
1.5 1.488 1.834 10
1.826 1.555 2.109 8
2.142 1.603 2.354 8
2.294 1.718 2.449 9
2.064 1.547 2.204 8
1.968 1.714 2.315 9
1.727 1.924 2.524 8
1.572 2.111 2.729 8
1.633 2.216 2.914 9
1.916 2.288 3.109 8
2.322 2.31 3.27 9
2.089 2.079 2.943 6
2.523 2.061 3.168 10
2.747 1.946 3.537 9
2.62 1.782 3.974 8
2.209 1.62 4.309 9
1.745 1.445 4.387 8
1.251 1.461 4.224 8
1.126 1.315 3.802 9
0.613 1.3 3.472 8
0.337 1.067 2.998 9
0.268 1.071 2.444 8
0.311 1.215 1.692 8
0.28 1.093 1.522 7
0.357 1.33 -0.007 10
0.321 1.197 -0.006 8
0.287 1.092 -0.603 9
0.252 0.637 -0.973 8
-0.154 0.41 -1.082 9
-0.866 0.557 -0.953 8
-1.395 0.289 -0.814 8
-1.255 0.26 -0.733 9
-1.559 -0.229 -0.612 8
-1.837 -0.289 -0.518 9
-1.817 -0.322 -0.725 8
-1.556 -0.479 -1.127 7
-1.343 -0.571 -1.66 10
-1.088 -0.669 -2.32 8
-0.98 -0.602 -2.088 9
-0.392 -0.826 -2.459 8
0.582 -1.23 -2.457 8
1.323 -1.446 -2.345 9
1.43 -1.172 -2.158 8
1.221 -0.611 -1.793 9
1.009 -0.054 -1.436 8
0.908 -0.049 -1.292 8
0.74 0.256 -1.229 9
0.396 0.494 -1.283 6
0.092 0.267 -1.424 11
-0.373 -0.118 -1.678 8
-1.031 -0.208 -1.863 8
-1.241 -0.431 -1.878 9
-1.117 -0.388 -1.691 8
-0.766 -0.696 -1.381 8
0.06 -1.005 -0.706 9
1.182 -1.241 0.1 8
2.274 -1.346 0.539 9
2.714 -1.219 0.312 8
2.443 -1.097 0.281 8
2.581 -1.063 -0.266 7
2.427 -1.209 -0.661 10
1.666 -1.268 -0.714 9
0.739 -1.195 -0.389 8
0.151 -1.123 0.157 8
0.067 -0.91 0.701 9
0.06 -0.819 0.63 8
0.479 -0.401 0.933 9
1.31 -0.021 0.944 8
2.164 0.288 0.936 8
2.891 0.475 0.844 9
3.24 0.531 0.531 8
2.916 0.477 0.478 7
2.682 0.368 0.085 10
1.861 0.018 -0.248 8
0.477 -0.257 -0.473 9
-0.947 -0.455 -0.507 8
-1.946 -0.687 -0.435 8
-2.39 -0.763 -0.176 9
-2.177 -0.911 0.376 8
-1.959 -0.82 0.339 9
-1.467 -0.994 0.851 8
-1.036 -1.012 0.944 8
-0.873 -0.958 0.544 9
-1.105 -0.785 -0.003 7
-1.677 -0.498 -0.538 10
-1.509 -0.448 -0.484 8
-2.17 -0.163 -1.059 8
-2.648 0.049 -1.585 9
-2.86 0.167 -1.926 8
-2.758 0.215 -1.968 9
-2.475 0.316 -1.732 8
-2.336 0.549 -1.47 8
-2.102 0.494 -1.323 9
-2.202 0.733 -1.081 8
-2.376 0.898 -0.736 9
-2.589 1.128 -0.257 6
-2.835 1.453 0.482 10
-2.836 1.72 1.424 9
-2.419 1.837 2.34 8
-2.177 1.653 2.106 9
-1.594 1.681 2.855 8
-1.024 1.731 3.288 8
-0.457 1.666 3.289 9
0.064 1.536 2.787 8
0.387 1.495 1.783 8
0.531 1.325 0.48 9
0.478 1.192 0.432 8
0.51 0.908 -0.793 7
0.473 0.656 -1.682 10
0.369 0.468 -2.093 8
0.239 0.347 -2.106 9
0.121 0.249 -1.868 8
0.109 0.224 -1.681 9
-0.016 0.14 -1.21 8
-0.189 0.053 -0.667 8
-0.389 -0.041 -0.255 9
-0.635 -0.158 -0.011 8
-0.963 -0.326 0.088 9
-1.232 -0.551 0.143 8
-1.109 -0.496 0.128 7
-1.301 -0.737 0.242 10
-1.537 -0.964 0.433 8
-1.719 -1.144 0.596 9
-1.717 -1.257 0.602 8
-1.495 -1.311 0.431 8
-0.938 -1.293 0.192 9
-0.844 -1.164 0.173 8
0.017 -1.096 0.021 9
0.817 -0.889 0.122 8
1.14 -0.712 0.312 8
0.941 -0.648 0.314 9
0.847 -0.483 0.315 6
0.517 -0.382 0.286 10
0.465 -0.344 0.257 9
0.582 -0.405 0.111 8
0.67 -0.364 -0.009 9
0.689 -0.187 -0.131 8
0.671 0.006 -0.288 8
0.553 0.145 -0.484 9
0.498 0.13 -0.436 8
0.278 0.203 -0.708 9
0.063 0.277 -1.007 8
-0.056 0.375 -1.222 8
-0.01 0.476 -1.372 7
0.289 0.519 -1.555 10
0.728 0.597 -1.657 9
0.655 0.537 -1.491 8
1.061 0.571 -1.556 8
1.399 0.536 -1.614 9
1.642 0.53 -1.59 8
1.775 0.4 -1.55 9
1.788 0.178 -1.437 8
1.699 0.017 -1.221 8
1.529 0.015 -1.099 9
1.427 -0.117 -0.724 8
1.332 -0.286 -0.3 7
1.249 -0.306 -0.038 10
1.218 -0.199 0.136 8
1.097 0.245 0.209 9
1.027 0.737 0.212 8
0.925 0.663 0.191 8
1.188 0.427 0.033 9
1.421 0.074 -0.3 8
1.331 0.16 -0.558 9
0.984 0.119 -0.746 8
0.67 -0.108 -0.801 8
0.603 -0.097 -0.721 9
0.459 -0.191 -0.655 7
0.128 -0.237 -0.603 10
-0.429 -0.262 -0.534 8
-0.928 -0.253 -0.446 8
-1.238 -0.169 -0.277 9
-1.338 0.065 0.179 8
-1.204 0.058 0.161 9
-1.037 0.207 0.728 8
-0.6 0.063 0.858 8
-0.106 -0.175 0.677 9
0.341 -0.303 0.696 8
0.666 -0.283 0.925 9
0.6 -0.255 0.833 6
0.758 -0.239 1.034 10
0.776 -0.246 0.932 9
0.658 -0.202 0.378 8
0.262 -0.237 -0.355 9
-0.437 -0.378 -0.836 8
-0.923 -0.089 -0.816 8
-1.007 0.4 -0.451 9
-0.906 0.36 -0.406 8
-0.825 0.268 -0.135 8
-0.631 0.003 0.022 9
-0.355 -0.02 0.24 8
-0.029 0.048 0.501 7
0.352 0.2 0.501 10
0.317 0.18 0.45 8
0.669 0.41 0.141 9
0.815 0.552 -0.262 8
0.673 0.604 -0.585 9
0.331 0.624 -0.513 8
0.063 0.525 -0.084 8
0.02 0.374 0.46 9
0.018 0.337 0.414 8
0.242 0.21 0.91 9
0.636 0.0 1.284 8
1.034 -0.248 1.539 7
1.277 -0.443 1.685 10
1.233 -0.584 1.753 8
0.894 -0.544 1.706 8
0.804 -0.489 1.535 9
0.34 -0.347 1.313 8
-0.075 -0.278 0.907 9
-0.377 -0.279 0.494 8
-0.548 -0.327 0.203 8
-0.723 -0.399 -0.013 9
-0.879 -0.457 -0.17 8
-0.791 -0.411 -0.153 9
-0.918 -0.436 -0.247 6
-1.094 -0.379 -0.344 10
-1.257 -0.244 -0.376 9
-1.333 -0.126 -0.301 8
-1.344 -0.048 -0.261 9
-1.21 -0.043 -0.235 8
-1.239 0.014 -0.313 8
-1.35 0.043 -0.333 9
-1.496 0.066 -0.229 8
-1.585 0.072 -0.164 9
-1.578 0.073 -0.221 8
-1.438 0.084 -0.451 8
-1.294 0.076 -0.405 7
-0.991 0.071 -0.622 10
-0.67 0.098 -0.615 9
-0.485 0.165 -0.534 8
-0.387 0.148 -0.376 8
-0.36 0.081 -0.024 9
-0.373 0.046 0.337 8
-0.335 0.041 0.304 8
-0.357 0.018 0.556 9
-0.376 0.008 0.712 8
-0.312 0.011 0.72 9
-0.131 0.014 0.636 8
-0.118 0.013 0.572 7
0.292 0.016 0.377 10
0.263 0.014 0.339 8
0.433 -0.002 0.111 9
0.513 -0.013 -0.024 8
0.514 -0.028 -0.079 8
0.439 -0.053 -0.071 9
0.283 -0.098 0.017 8
0.254 -0.089 0.016 9
0.077 -0.179 0.089 8
-0.052 -0.275 0.115 8
-0.075 -0.339 0.085 9
-0.008 -0.36 0.01 6
0.086 -0.337 -0.069 11
0.152 -0.318 -0.115 8
0.136 -0.286 -0.103 8
0.155 -0.266 -0.132 9
0.142 -0.225 -0.15 8
0.081 -0.206 -0.144 8
-0.055 -0.201 -0.125 9
-0.249 -0.184 -0.084 8
-0.412 -0.158 -0.009 9
-0.37 -0.142 -0.008 8
-0.402 -0.116 0.072 9
-0.296 -0.088 0.111 6
-0.144 -0.051 0.152 10
0.002 0.019 0.2 9
0.142 0.098 0.221 8
0.231 0.165 0.21 8
0.208 0.149 0.189 9
0.238 0.216 0.143 8
0.227 0.257 0.033 9
0.189 0.264 -0.146 8
0.136 0.25 -0.319 8
0.091 0.22 -0.416 9
0.082 0.198 -0.374 8
0.077 0.169 -0.411 7
0.101 0.14 -0.371 10
0.103 0.099 -0.341 8
0.078 0.085 -0.261 9
0.077 0.091 -0.091 8
0.099 0.085 -0.021 9
0.089 0.077 -0.019 8
0.109 0.083 -0.013 8
0.122 0.071 0.068 9
0.101 0.03 0.204 8
0.041 -0.039 0.326 8
-0.05 -0.108 0.39 9
-0.045 -0.098 0.351 7
-0.125 -0.093 0.339 10
-0.094 -0.031 0.303 8
0.034 0.035 0.219 8
0.165 0.078 0.044 9
0.293 0.096 -0.141 8
0.393 0.105 -0.293 9
0.376 0.109 -0.157 8
0.339 0.098 -0.141 8
0.189 0.109 0.23 9
0.029 0.107 0.565 8
-0.022 0.079 0.857 9
0.059 0.044 1.028 6
0.239 0.008 1.073 10
0.215 0.007 0.966 9
0.452 -0.027 0.99 8
0.671 -0.053 1.126 9
0.773 -0.081 1.24 8
0.792 -0.187 1.219 8
0.728 -0.191 1.058 9
0.728 -0.117 0.704 8
0.655 -0.105 0.634 8
0.809 -0.107 0.194 9
0.876 -0.111 -0.06 8
0.782 -0.124 -0.042 7
0.75 -0.074 0.019 10
0.911 0.02 0.046 8
1.15 0.048 0.034 9
1.035 0.043 0.031 8
1.178 0.068 -0.104 9
1.075 0.115 -0.111 8
0.7 0.194 0.063 8
0.228 0.281 0.16 9
# end
#Thu Feb 26 20:39:00 GMT+08:00 20158
