# Supplementary material for: Abnormal Gait Behavior Detection for Elderly Based on Enhanced Wigner-Ville Analysis and Cloud Incremental SVM Learning
Source: Hindawi journal article supplement (doi:10.1155/2016/5869238), 2016-01-01
Supplement: f1 [file 5869238.f1.zip › Supplementary Materials/Original Data/Leftward fall Ending lying/original__118.txt]

# Accelerometer Values
# filename:  original__118.txt
# Saving start time: Thu Feb 26 20:39:02 GMT+08:00 2015

# sensor resolution: 0.0095825195m/s^2
#Sensorvendor: KIONIX, name: KX023 Accelerometer, type: 1,version : 1, range 39.240005

# X value, Y value, Z value, time diff in ms
-0.794 0.191 -0.922 9
-0.799 0.208 -1.12 8
-0.719 0.187 -1.008 7
-0.642 0.104 -1.033 10
-0.506 -0.013 -0.908 8
-0.31 -0.175 -0.643 9
-0.059 -0.368 -0.338 8
0.179 -0.497 -0.087 8
0.335 -0.536 0.051 9
0.413 -0.526 0.048 8
0.372 -0.474 0.043 9
0.389 -0.438 0.038 8
0.352 -0.397 0.045 8
0.283 -0.372 -0.045 9
0.175 -0.357 -0.188 6
-0.037 -0.331 -0.343 11
-0.287 -0.294 -0.453 8
-0.258 -0.264 -0.407 8
-0.404 -0.248 -0.475 9
-0.378 -0.284 -0.533 8
-0.171 -0.345 -0.503 8
0.096 -0.426 -0.331 9
0.377 -0.554 -0.105 8
0.667 -0.664 0.083 9
0.6 -0.597 0.074 8
0.806 -0.679 0.153 8
0.839 -0.758 0.039 7
0.683 -0.823 -0.179 10
0.41 -0.845 -0.382 9
0.178 -0.879 -0.663 8
0.16 -0.791 -0.597 8
0.075 -0.88 -0.947 9
0.07 -0.93 -1.206 8
0.137 -0.976 -1.337 9
0.313 -1.068 -1.332 8
0.528 -1.101 -1.22 8
0.66 -1.088 -1.183 9
0.594 -0.979 -1.064 8
0.621 -0.991 -1.163 7
0.609 -0.935 -1.243 10
0.577 -0.815 -1.287 8
0.548 -0.708 -1.402 9
0.561 -0.586 -1.587 8
0.631 -0.449 -1.735 8
0.568 -0.404 -1.562 9
0.634 -0.261 -1.643 8
0.684 -0.232 -1.622 9
0.78 -0.343 -1.528 8
0.796 -0.545 -1.394 8
0.602 -0.847 -1.276 9
0.542 -0.762 -1.148 7
0.213 -0.979 -1.095 10
-0.18 -0.996 -1.028 8
-0.586 -0.917 -0.906 8
-0.841 -0.752 -0.712 9
-0.766 -0.411 -0.233 8
-0.433 -0.015 0.421 9
-0.39 -0.014 0.379 8
0.014 0.277 0.719 8
0.502 0.502 0.577 9
1.076 0.769 0.231 8
1.557 1.101 -0.071 9
1.878 1.389 -0.169 6
2.002 1.56 0.068 10
1.801 1.404 0.061 9
1.682 1.455 0.564 8
1.416 1.436 1.27 9
1.124 1.461 2.12 8
0.886 1.623 2.841 8
0.796 1.812 3.181 9
0.883 1.869 3.059 8
0.795 1.682 2.753 8
0.962 1.678 2.344 9
1.076 1.821 2.018 8
1.197 2.082 2.189 7
1.324 2.16 2.791 10
1.475 2.054 3.625 8
1.759 1.872 4.521 9
1.583 1.685 4.069 8
2.078 1.473 4.7 9
2.708 1.28 4.919 8
3.158 1.215 4.818 8
3.318 1.337 4.547 9
3.261 1.56 4.328 8
2.935 1.404 3.895 9
2.676 1.594 3.802 8
2.208 1.703 3.654 7
1.578 1.809 3.345 10
1.09 1.921 2.723 8
0.895 1.965 1.737 9
0.771 1.91 0.681 8
0.694 1.719 0.613 8
0.527 1.605 -0.234 9
0.281 1.414 -0.737 8
-0.115 1.061 -0.915 8
-0.636 0.571 -0.943 9
-1.225 0.127 -0.87 8
-1.879 -0.183 -0.78 9
-1.691 -0.165 -0.702 6
-2.275 -0.355 -0.698 10
-2.86 -0.411 -0.891 9
-3.252 -0.209 -1.137 8
-2.918 -0.158 -1.257 9
-2.102 -0.42 -1.465 8
-1.303 -0.592 -1.674 8
-1.172 -0.532 -1.507 9
-0.533 -0.507 -1.545 8
0.036 -0.316 -1.5 9
0.624 -0.317 -1.64 8
1.094 -0.51 -2.037 8
0.984 -0.459 -1.833 7
1.16 -0.648 -2.258 10
1.085 -0.583 -2.032 9
0.978 -1.323 -1.666 8
0.962 -1.775 -1.135 8
0.945 -2.291 -0.558 9
0.795 -2.593 -0.202 8
0.505 -2.487 -0.172 9
0.455 -2.238 -0.155 8
0.0 -1.841 -0.48 8
-0.638 -1.394 -1.116 9
-1.176 -1.028 -1.748 8
-1.397 -0.703 -1.99 7
-1.346 -0.473 -1.743 10
-0.979 -0.452 -1.224 8
-0.881 -0.407 -1.102 9
-0.306 -0.539 -0.606 8
0.344 -0.679 -0.082 8
0.918 -0.944 0.404 9
1.115 -1.284 0.578 8
0.896 -1.362 0.452 9
0.451 -1.082 0.163 8
0.406 -0.974 0.147 8
-0.077 -0.475 -0.249 9
-0.498 0.134 -0.745 7
-0.757 0.616 -1.234 10
-0.798 0.813 -1.708 8
-0.75 0.789 -2.051 8
-0.847 0.566 -2.099 9
-0.762 0.51 -1.889 8
-1.08 0.171 -1.561 9
-1.47 -0.097 -0.675 8
-1.725 -0.132 0.621 8
-1.629 0.03 1.705 9
-1.0 0.255 2.112 8
-0.9 0.229 1.901 9
-0.009 0.413 1.688 6
0.739 0.643 1.032 10
1.203 0.977 0.277 9
1.058 1.19 -0.559 8
0.282 1.276 -1.402 8
-0.653 1.502 -1.831 9
-0.587 1.352 -1.648 8
-1.082 1.627 -1.474 9
-1.182 1.926 -1.021 8
-1.125 2.074 -0.722 8
-0.774 2.124 -0.138 9
-0.607 2.222 0.424 8
-0.546 1.999 0.381 7
-0.737 1.628 0.227 10
-1.046 1.055 -0.178 8
-1.422 0.641 -0.231 9
-1.7 0.185 0.134 8
-1.801 -0.34 0.752 9
-1.673 -0.838 1.435 8
-1.432 -1.258 1.77 8
-1.289 -1.132 1.593 9
-0.898 -1.422 1.543 8
-0.308 -1.37 1.276 9
0.372 -1.182 0.822 8
1.157 -1.281 0.339 7
1.57 -1.459 -0.057 10
1.413 -1.313 -0.051 8
1.159 -1.297 -0.046 8
0.471 -1.197 -0.364 9
-0.331 -1.081 -0.437 8
-0.928 -0.874 -0.681 9
-1.22 -0.58 -0.979 8
-1.281 -0.351 -1.134 8
-1.153 -0.316 -1.021 9
-1.069 -0.28 -1.038 8
-0.919 -0.417 -0.918 9
-0.767 -0.591 -0.584 6
-0.606 -0.71 -0.155 10
-0.378 -0.786 0.128 9
-0.131 -0.764 0.194 8
-0.118 -0.688 0.174 9
0.093 -0.593 0.053 8
0.285 -0.503 -0.225 8
0.486 -0.421 -0.548 9
0.642 -0.339 -0.905 8
0.704 -0.284 -1.274 9
0.639 -0.272 -1.508 8
0.575 -0.245 -1.357 8
0.381 -0.233 -1.486 7
0.32 -0.215 -1.521 10
0.459 -0.195 -1.537 9
0.729 -0.131 -1.456 8
1.189 -0.095 -1.094 8
1.463 -0.016 -0.515 9
1.316 -0.014 -0.463 8
1.201 0.181 0.067 8
0.944 0.386 0.456 9
0.668 0.596 0.624 8
0.444 0.786 0.512 9
0.343 0.9 0.371 8
0.308 0.81 0.333 7
0.334 1.034 0.395 10
0.508 1.318 0.655 8
0.8 1.365 0.88 9
1.07 1.17 1.032 8
1.343 0.811 1.318 8
1.415 0.419 1.599 9
1.273 0.377 1.439 8
1.115 0.121 1.567 9
1.034 0.006 1.574 8
1.086 -0.026 1.404 8
1.173 -0.035 1.041 9
1.252 -0.059 0.615 6
1.26 -0.069 0.29 11
1.134 -0.062 0.261 8
0.999 -0.057 0.001 8
0.744 -0.068 -0.176 9
0.375 -0.069 -0.148 8
0.041 -0.055 0.044 8
-0.037 -0.048 0.298 9
0.15 -0.049 0.565 8
0.135 -0.044 0.508 9
0.376 -0.047 0.722 8
0.556 -0.111 0.873 8
0.636 -0.276 1.049 7
0.568 -0.51 1.19 10
0.374 -0.725 1.228 9
0.337 -0.652 1.105 8
-0.006 -0.785 1.091 8
-0.477 -0.893 1.056 9
-0.964 -0.994 0.988 8
-1.326 -1.046 0.858 9
-1.505 -1.051 0.714 8
-1.506 -1.014 0.624 8
-1.355 -0.912 0.562 9
-1.216 -0.867 0.525 8
-0.993 -0.857 0.49 7
-0.743 -0.841 0.417 10
-0.531 -0.774 0.283 8
-0.415 -0.662 0.078 9
-0.397 -0.504 -0.14 8
-0.358 -0.453 -0.126 8
-0.406 -0.27 -0.276 9
-0.459 -0.088 -0.394 8
-0.465 0.049 -0.524 9
-0.425 0.138 -0.648 8
-0.384 0.187 -0.726 8
-0.345 0.2 -0.754 9
-0.31 0.18 -0.679 7
-0.254 0.167 -0.655 10
-0.19 0.139 -0.617 8
-0.114 0.104 -0.596 8
-0.058 0.089 -0.53 9
-0.042 0.089 -0.417 8
-0.037 0.08 -0.294 9
-0.052 0.072 -0.265 8
-0.11 0.03 -0.134 8
-0.196 0.031 -0.022 9
-0.28 0.022 0.064 8
-0.321 -0.013 0.131 9
-0.289 -0.012 0.118 6
-0.277 -0.034 0.081 10
-0.253 -0.011 -0.084 9
-0.228 0.028 -0.281 8
-0.218 0.066 -0.411 9
-0.227 0.093 -0.479 8
-0.222 0.104 -0.495 8
-0.238 0.103 -0.447 9
-0.214 0.093 -0.402 8
-0.26 0.082 -0.328 9
-0.282 0.064 -0.282 8
-0.249 0.048 -0.265 8
-0.179 0.046 -0.246 7
-0.102 0.05 -0.186 10
-0.072 0.031 -0.047 8
-0.065 0.028 -0.042 9
-0.102 -0.024 0.166 8
-0.142 -0.104 0.375 9
-0.128 -0.153 0.464 8
-0.059 -0.15 0.364 8
0.005 -0.116 0.177 9
0.018 -0.074 0.035 8
0.016 -0.067 0.031 9
-0.005 -0.048 -0.058 8
-0.023 -0.038 -0.095 7
-0.039 -0.025 -0.089 10
-0.065 -0.032 -0.066 8
-0.087 -0.047 -0.043 9
-0.078 -0.043 -0.039 8
-0.08 -0.042 -0.033 8
-0.062 -0.024 -0.053 9
-0.009 -0.005 -0.079 8
0.068 0.021 -0.093 9
0.119 0.053 -0.106 8
0.117 0.067 -0.08 8
0.105 0.06 -0.072 9
0.048 0.056 -0.007 6
-0.032 0.03 0.053 10
-0.099 0.008 0.108 9
-0.121 0.009 0.145 8
-0.079 0.01 0.142 9
0.008 0.019 0.114 8
0.007 0.017 0.102 8
0.094 0.012 0.074 9
0.169 -0.01 0.06 8
0.227 -0.01 0.067 9
0.241 0.004 0.111 8
0.195 0.02 0.206 8
0.175 0.018 0.186 7
0.095 0.013 0.31 10
-0.003 -0.023 0.401 9
-0.118 -0.066 0.437 8
-0.202 -0.095 0.433 8
-0.22 -0.095 0.395 9
-0.164 -0.106 0.235 8
-0.147 -0.095 0.212 9
-0.035 -0.08 0.082 8
0.06 0.014 -0.015 8
0.129 0.101 -0.237 9
0.167 0.139 -0.355 8
0.146 0.153 -0.257 7
0.09 0.149 -0.047 10
0.081 0.134 -0.042 8
0.025 0.119 0.168 9
-0.007 0.101 0.296 8
-0.015 0.082 0.309 8
-0.027 0.059 0.267 9
-0.083 0.03 0.251 8
-0.182 0.006 0.256 9
-0.164 0.005 0.23 8
-0.245 -0.04 0.234 8
-0.263 -0.081 0.247 9
-0.214 -0.068 0.173 7
-0.112 -0.029 -0.07 10
-0.026 0.006 -0.332 8
-0.024 0.005 -0.515 8
-0.001 0.005 -0.464 9
-0.025 0.03 -0.583 8
-0.113 0.029 -0.595 9
-0.255 0.016 -0.494 8
-0.33 -0.022 -0.345 8
-0.261 -0.07 -0.223 9
-0.235 -0.063 -0.201 8
-0.098 -0.096 -0.134 9
0.013 -0.1 -0.116 6
0.075 -0.07 -0.119 10
0.084 -0.022 -0.092 9
0.037 -0.006 -0.027 8
-0.057 -0.026 0.075 8
-0.051 -0.024 0.067 9
-0.158 -0.052 0.214 8
-0.215 -0.073 0.347 9
-0.168 -0.072 0.365 8
-0.05 -0.049 0.22 8
0.043 -0.018 0.013 9
0.058 0.021 -0.129 8
0.052 0.019 -0.116 7
0.029 0.066 -0.222 10
0.022 0.095 -0.311 8
0.018 0.101 -0.334 9
0.003 0.099 -0.263 8
-0.042 0.086 -0.116 9
-0.037 0.077 0.109 8
-0.121 0.07 0.098 8
-0.234 -0.035 0.204 9
-0.382 0.004 0.048 8
-0.457 0.065 -0.19 9
-0.382 0.084 -0.413 8
-0.344 0.075 -0.372 7
-0.265 0.098 -0.453 10
-0.246 0.109 -0.291 8
-0.251 0.088 -0.081 9
-0.169 0.059 0.194 8
-0.036 0.041 0.457 8
0.028 0.03 0.564 9
-0.008 0.025 0.589 8
-0.007 0.023 0.53 8
-0.124 0.027 0.441 9
-0.366 0.037 0.269 8
-0.643 0.047 0.243 9
-0.662 0.036 0.285 6
-0.42 0.127 0.247 10
-0.1 0.013 0.081 9
-0.09 0.012 0.073 8
0.266 -0.273 -0.039 9
0.498 -0.228 0.098 8
0.403 -0.066 0.228 8
0.06 0.008 0.468 9
-0.438 0.106 0.668 8
-0.64 0.139 0.617 9
-0.576 0.125 0.555 8
-0.403 0.09 0.402 8
-0.063 0.123 0.162 7
0.383 0.174 -0.107 10
0.77 0.234 -0.261 9
1.137 0.302 -0.183 8
1.023 0.272 -0.165 8
1.309 0.31 0.099 9
1.238 0.303 0.479 8
0.853 0.32 0.811 9
0.458 0.329 0.94 8
0.189 0.313 0.88 8
0.064 0.317 0.702 9
0.057 0.286 0.631 8
0.087 0.272 0.377 7
# end
#Thu Feb 26 20:39:06 GMT+08:00 20153
