# Supplementary material for: Abnormal Gait Behavior Detection for Elderly Based on Enhanced Wigner-Ville Analysis and Cloud Incremental SVM Learning
Source: Hindawi journal article supplement (doi:10.1155/2016/5869238), 2016-01-01
Supplement: f1 [file 5869238.f1.zip › Supplementary Materials/Original Data/Leftward fall Ending lying/original__119.txt]

# Accelerometer Values
# filename:  original__119.txt
# Saving start time: Thu Feb 26 20:39:08 GMT+08:00 2015

# sensor resolution: 0.0095825195m/s^2
#Sensorvendor: KIONIX, name: KX023 Accelerometer, type: 1,version : 1, range 39.240005

# X value, Y value, Z value, time diff in ms
-0.023 -0.026 0.109 8
-0.021 -0.023 0.098 7
0.188 -0.028 0.031 10
0.393 -0.043 -0.003 8
0.565 -0.033 -0.005 9
0.571 0.0 0.018 8
0.393 0.035 0.047 8
0.133 0.053 0.057 9
-0.149 0.055 0.052 8
-0.134 0.05 0.047 9
-0.382 0.037 0.03 8
-0.521 0.01 0.005 8
-0.501 -0.017 -0.03 9
-0.334 -0.035 -0.09 7
-0.097 -0.022 -0.132 10
-0.087 -0.019 -0.119 8
0.122 0.02 -0.113 8
0.253 0.042 -0.095 9
0.272 0.036 -0.061 8
0.155 0.014 0.008 9
-0.046 -0.018 0.071 8
-0.238 -0.057 0.095 8
-0.215 -0.051 0.085 9
-0.318 -0.091 0.063 8
-0.314 -0.107 0.007 8
-0.26 -0.109 -0.057 7
-0.214 -0.122 -0.115 10
-0.192 -0.115 -0.15 9
-0.161 -0.088 -0.168 8
-0.145 -0.08 -0.151 8
-0.073 -0.03 -0.119 9
0.051 0.011 -0.053 8
0.187 0.01 -0.016 9
0.256 -0.001 0.039 8
0.239 -0.008 0.12 8
0.215 -0.007 0.108 9
0.159 -0.023 0.174 8
0.114 -0.058 0.224 7
0.109 -0.115 0.286 10
0.115 -0.176 0.37 8
0.1 -0.198 0.444 9
0.07 -0.193 0.455 8
0.063 -0.173 0.409 9
0.031 -0.175 0.358 8
0.008 -0.177 0.257 8
-0.008 -0.181 0.126 9
-0.031 -0.153 0.012 8
-0.061 -0.077 -0.078 9
-0.112 0.006 -0.156 8
-0.101 0.005 -0.141 7
-0.19 0.104 -0.197 10
-0.339 0.199 -0.219 8
-0.486 0.257 -0.217 8
-0.547 0.279 -0.228 9
-0.538 0.284 -0.258 8
-0.512 0.278 -0.273 9
-0.461 0.25 -0.246 8
-0.441 0.23 -0.226 8
-0.417 0.198 -0.172 9
-0.39 0.154 -0.13 8
-0.362 0.092 -0.153 9
-0.325 0.083 -0.138 6
-0.293 -0.014 -0.254 10
-0.257 -0.128 -0.484 9
-0.228 -0.225 -0.735 8
-0.216 -0.305 -0.956 9
-0.262 -0.379 -1.182 8
-0.413 -0.447 -1.38 8
-0.595 -0.526 -1.479 9
-0.536 -0.474 -1.331 8
-0.661 -0.561 -1.332 9
-0.696 -0.612 -1.291 8
-0.665 -0.648 -1.281 8
-0.587 -0.722 -1.317 7
-0.465 -0.796 -1.339 10
-0.234 -0.804 -1.366 9
-0.21 -0.724 -1.229 8
0.061 -0.686 -1.283 8
0.313 -0.698 -1.312 9
0.423 -0.67 -1.397 8
0.366 -0.603 -1.463 8
0.325 -0.684 -1.349 9
0.292 -0.615 -1.214 8
0.294 -0.81 -1.069 9
0.367 -1.007 -0.97 8
0.512 -1.167 -0.813 7
0.679 -1.31 -0.612 10
0.824 -1.399 -0.463 8
0.924 -1.41 -0.358 9
0.831 -1.269 -0.322 8
0.914 -1.281 -0.238 8
0.963 -1.301 -0.186 9
0.919 -1.314 -0.202 8
0.775 -1.244 -0.229 9
0.551 -1.2 -0.272 8
0.281 -1.297 -0.259 8
0.253 -1.167 -0.233 9
-0.036 -1.249 -0.138 6
-0.324 -1.225 -0.16 11
-0.547 -1.122 -0.369 8
-0.73 -0.882 -0.623 8
-0.851 -0.525 -0.764 9
-0.766 -0.473 -0.687 8
-0.695 -0.425 -0.618 8
-0.376 0.058 -0.293 9
0.124 0.106 0.121 8
0.711 0.088 0.519 9
1.207 -0.009 0.913 8
1.376 -0.258 1.322 8
1.238 -0.232 1.19 7
0.992 -0.422 1.491 10
0.457 -0.286 1.587 9
-0.071 0.058 1.648 8
-0.237 0.517 1.619 8
0.043 0.999 1.373 9
0.688 1.391 1.106 8
0.619 1.251 0.996 9
1.555 1.697 1.066 8
2.451 2.125 1.344 8
2.981 2.298 1.337 9
2.972 2.335 1.039 8
2.675 2.101 0.933 7
2.162 2.882 1.156 10
1.945 2.594 1.04 8
1.727 2.73 1.353 9
1.876 2.848 1.819 8
2.323 3.048 2.472 9
2.765 3.037 3.037 8
3.048 2.794 3.541 8
2.743 2.514 3.187 9
2.684 2.385 3.894 8
2.306 2.277 4.665 8
1.913 2.035 5.231 9
1.649 1.756 5.446 7
1.662 1.531 5.181 10
1.938 1.338 4.343 8
1.745 1.204 3.909 8
2.033 1.057 2.684 9
2.052 0.881 1.384 8
1.646 0.572 0.332 9
0.794 0.168 -0.321 8
-0.372 -0.223 -0.544 8
-1.558 -0.454 -0.425 9
-1.402 -0.409 -0.382 8
-2.486 -0.493 -0.286 9
-3.259 -0.424 -0.558 6
-3.126 -0.015 -0.891 10
-1.882 0.67 -1.053 9
0.051 1.093 -1.129 8
0.046 1.001 -1.092 9
0.041 0.901 -0.983 8
3.357 0.633 -0.782 8
3.294 0.206 -0.243 9
2.388 -0.573 0.439 8
1.061 -1.576 0.893 9
-0.386 -2.292 1.212 8
-0.348 -2.063 1.091 8
-1.408 -2.259 1.268 7
-1.482 -2.27 0.955 10
-0.845 -2.101 0.231 8
-0.134 -1.764 -0.652 9
0.28 -1.563 -1.47 8
0.199 -1.454 -1.882 9
0.179 -1.309 -1.694 8
-0.246 -1.272 -1.554 8
-0.665 -1.241 -1.093 9
-0.893 -1.217 -0.662 8
-0.933 -1.263 -0.486 9
-0.813 -1.333 -0.603 8
-0.731 -1.2 -0.543 7
-0.538 -1.347 -0.906 10
-0.432 -1.477 -1.422 8
-0.408 -1.214 -1.895 9
-0.282 -0.581 -2.342 8
-0.047 0.124 -2.721 8
0.2 0.727 -2.632 9
0.18 0.654 -2.369 8
0.177 0.943 -1.828 9
-0.174 0.948 -1.13 8
-0.596 0.896 -0.21 8
-0.714 0.918 0.728 9
-0.34 0.926 1.16 6
0.184 0.683 1.104 10
0.165 0.615 0.993 9
0.626 0.16 0.759 8
0.688 -0.385 0.385 9
-0.02 -0.964 -0.016 8
-1.22 -1.316 0.047 8
-2.485 -1.325 0.538 9
-3.345 -1.078 0.952 8
-3.01 -0.971 0.857 9
-3.136 -0.535 1.065 8
-2.425 -0.04 0.894 8
-0.934 0.425 0.516 7
0.63 0.766 -0.18 10
1.65 1.033 -1.35 9
1.485 0.93 -1.215 8
2.07 1.036 -2.309 8
1.838 0.879 -3.006 9
0.696 0.641 -3.076 8
-0.778 0.353 -2.561 9
-2.274 0.317 -1.769 8
-3.375 0.727 -0.845 8
-3.037 0.655 -0.761 9
-2.999 0.721 0.116 8
-1.947 0.214 0.628 7
-0.555 -0.252 0.823 10
0.845 -0.52 0.894 8
1.661 -0.547 0.773 9
1.966 -0.532 0.698 8
1.769 -0.479 0.629 8
1.931 -0.821 0.641 9
1.588 -1.178 0.392 8
0.768 -1.067 0.04 9
0.009 -0.784 -0.244 8
-0.551 -0.515 -0.583 8
-0.927 -0.248 -0.921 9
-0.834 -0.223 -0.829 7
-0.947 -0.03 -1.023 10
-0.854 0.083 -1.034 8
-0.605 0.081 -0.935 8
-0.298 0.032 -0.702 9
-0.058 0.0 -0.441 8
-0.052 0.0 -0.397 9
0.202 -0.041 -0.172 8
0.355 -0.084 0.026 8
0.251 -0.11 0.169 9
0.02 -0.122 0.326 8
-0.177 -0.12 0.457 9
-0.159 -0.108 0.411 6
-0.195 -0.097 0.464 10
-0.096 -0.069 0.44 9
0.07 -0.033 0.365 8
0.38 -0.006 0.282 8
0.756 0.024 0.2 9
0.986 0.059 0.158 8
1.031 0.055 0.289 9
0.927 0.05 0.26 8
0.809 0.007 0.519 8
0.532 -0.063 0.788 9
0.193 -0.173 0.985 8
-0.087 -0.262 1.011 7
-0.283 -0.287 0.847 10
-0.255 -0.258 0.558 8
-0.365 -0.232 0.502 9
-0.392 -0.208 0.154 8
-0.359 -0.125 -0.143 9
-0.293 -0.081 -0.282 8
-0.209 -0.108 -0.226 8
-0.162 -0.129 -0.028 9
-0.146 -0.116 -0.025 8
-0.15 -0.114 0.109 9
-0.175 -0.079 0.12 8
-0.204 -0.015 0.009 7
-0.215 0.029 -0.176 10
-0.232 0.057 -0.31 8
-0.306 0.052 -0.351 9
-0.275 0.047 -0.316 8
-0.38 -0.018 -0.286 8
-0.409 -0.127 -0.236 9
-0.358 -0.203 -0.178 8
-0.316 -0.218 -0.116 8
-0.317 -0.233 -0.03 9
-0.361 -0.256 0.119 8
-0.325 -0.23 0.107 9
-0.338 -0.234 0.226 6
-0.259 -0.212 0.237 10
-0.149 -0.159 0.185 9
-0.044 -0.105 0.088 8
0.046 -0.056 -0.047 9
0.042 -0.051 -0.042 8
0.078 -0.005 -0.172 8
0.03 -0.001 -0.229 9
-0.053 -0.037 -0.194 8
-0.123 -0.096 -0.076 9
-0.207 -0.192 0.089 8
-0.267 -0.28 0.252 8
-0.24 -0.252 0.227 7
-0.216 -0.265 0.336 10
-0.103 -0.171 0.34 9
0.098 -0.057 0.243 8
0.33 0.042 0.165 8
0.469 0.159 0.17 9
0.458 0.233 0.205 8
0.412 0.21 0.184 9
0.291 0.227 0.246 8
0.121 0.201 0.294 8
-0.048 0.158 0.262 9
-0.181 0.136 0.094 8
-0.163 0.122 0.084 7
-0.21 0.165 -0.539 10
-0.189 0.148 -0.485 8
-0.074 0.143 -0.671 9
0.069 0.125 -0.77 8
0.23 0.079 -0.799 8
0.351 0.039 -0.723 9
0.327 -0.004 -0.539 8
0.294 -0.003 -0.485 9
0.169 -0.097 -0.195 8
-0.004 -0.235 0.143 8
-0.171 -0.355 0.379 9
-0.277 -0.411 0.479 6
-0.305 -0.41 0.478 11
-0.261 -0.361 0.356 8
-0.235 -0.325 0.321 8
-0.125 -0.274 0.099 9
-0.002 -0.176 -0.031 8
0.07 -0.061 -0.009 8
0.111 0.012 0.064 9
0.123 0.085 0.154 8
0.126 0.138 0.221 9
0.114 0.124 0.199 8
0.126 0.146 0.266 9
0.14 0.154 0.299 6
0.156 0.171 0.242 10
0.176 0.204 0.083 9
0.219 0.258 -0.105 8
0.197 0.232 -0.095 8
0.231 0.287 -0.224 9
0.193 0.312 -0.286 8
0.108 0.308 -0.299 9
0.023 0.285 -0.259 8
-0.048 0.236 -0.015 8
-0.085 0.162 0.3 9
-0.076 0.146 0.27 8
-0.068 0.043 0.397 7
-0.039 -0.073 0.403 10
-0.019 -0.162 0.371 8
-0.014 -0.188 0.293 9
-0.01 -0.165 0.183 8
-0.01 -0.146 0.075 9
-0.009 -0.132 0.067 8
-0.07 -0.132 0.011 8
-0.206 -0.157 0.031 9
-0.403 -0.18 0.1 8
-0.599 -0.202 0.183 8
-0.671 -0.261 0.261 9
-0.604 -0.235 0.234 7
-0.476 -0.311 0.307 10
-0.236 -0.344 0.315 8
-0.005 -0.342 0.249 8
0.167 -0.317 0.185 9
0.236 -0.28 0.146 8
0.212 -0.244 0.109 9
0.191 -0.219 0.098 8
0.095 -0.192 0.062 8
-0.034 -0.156 0.025 9
-0.189 -0.129 -0.003 8
-0.352 -0.131 -0.022 9
-0.472 -0.128 -0.077 6
-0.512 -0.112 -0.192 10
-0.461 -0.1 -0.173 9
-0.416 -0.086 -0.286 8
-0.285 -0.029 -0.362 9
-0.112 0.049 -0.4 8
0.031 0.115 -0.385 8
0.096 0.191 -0.363 9
0.119 0.217 -0.351 8
0.107 0.195 -0.316 9
0.11 0.199 -0.355 8
-0.047 0.325 -0.333 8
-0.201 0.394 -0.153 7
-0.208 0.284 -0.045 10
-0.162 0.155 0.014 8
-0.146 0.14 0.013 9
-0.136 0.089 0.041 8
-0.207 0.123 0.029 9
-0.227 0.144 0.087 8
-0.043 0.12 0.125 8
0.189 0.122 0.054 9
0.281 0.068 0.126 8
0.253 0.061 0.114 9
0.273 -0.052 0.401 8
0.238 -0.126 0.503 7
0.081 -0.149 0.385 10
-0.167 -0.088 0.205 8
-0.35 0.011 0.023 9
-0.39 0.073 -0.097 8
-0.351 0.065 -0.087 8
-0.353 0.105 -0.256 9
-0.279 0.212 -0.309 8
-0.163 0.3 -0.268 9
-0.092 0.085 -0.425 8
-0.034 -0.041 -0.457 8
-0.124 0.147 -0.249 9
-0.112 0.132 -0.224 6
-0.251 0.211 0.005 11
-0.341 0.139 0.29 8
-0.372 -0.05 0.613 8
-0.455 -0.155 1.033 9
-0.568 -0.049 1.249 8
-0.511 -0.044 1.124 8
-0.392 0.077 0.953 9
-0.161 0.187 0.612 8
0.051 0.321 0.222 9
0.264 0.456 -0.052 8
0.374 0.589 -0.17 8
0.337 0.53 -0.153 7
0.257 0.64 -0.15 10
0.057 0.718 -0.127 9
-0.193 0.799 -0.134 8
-0.479 0.866 -0.195 8
-0.728 0.881 -0.354 9
-0.927 0.845 -0.477 8
-1.038 0.783 -0.455 9
-0.934 0.705 -0.41 8
-0.92 0.609 -0.315 8
-0.756 0.464 -0.179 9
# end
#Thu Feb 26 20:39:11 GMT+08:00 2015#
