# Supplementary material for: Abnormal Gait Behavior Detection for Elderly Based on Enhanced Wigner-Ville Analysis and Cloud Incremental SVM Learning
Source: Hindawi journal article supplement (doi:10.1155/2016/5869238), 2016-01-01
Supplement: f1 [file 5869238.f1.zip › Supplementary Materials/Original Data/Leftward fall Ending lying/original__120.txt]

# Accelerometer Values
# filename:  original__120.txt
# Saving start time: Thu Feb 26 20:39:14 GMT+08:00 2015

# sensor resolution: 0.0095825195m/s^2
#Sensorvendor: KIONIX, name: KX023 Accelerometer, type: 1,version : 1, range 39.240005

# X value, Y value, Z value, time diff in ms
0.241 -0.39 0.25 8
0.132 -0.359 0.259 9
0.032 -0.332 0.326 6
-0.051 -0.306 0.376 11
-0.046 -0.276 0.338 8
-0.093 -0.245 0.354 8
-0.082 -0.211 0.302 9
-0.006 -0.178 0.147 8
0.105 -0.14 -0.047 8
0.19 -0.093 -0.207 9
0.215 -0.031 -0.349 8
0.194 -0.028 -0.314 9
0.151 0.04 -0.386 8
0.048 0.077 -0.358 8
-0.087 0.048 -0.28 7
-0.218 -0.011 -0.185 10
-0.303 -0.06 -0.105 9
-0.273 -0.054 -0.095 8
-0.306 -0.084 -0.085 8
-0.284 -0.097 -0.072 9
-0.211 -0.09 -0.122 8
-0.097 -0.071 -0.174 9
0.034 -0.053 -0.224 8
0.123 -0.043 -0.233 8
0.111 -0.039 -0.209 9
0.123 -0.033 -0.155 8
0.08 -0.027 -0.05 7
0.029 -0.029 0.11 10
0.023 -0.041 0.263 8
0.051 -0.046 0.339 9
0.075 -0.043 0.332 8
0.067 -0.038 0.299 8
0.1 -0.026 0.189 9
0.14 -0.005 0.03 8
0.169 0.012 -0.099 9
0.173 0.013 -0.19 8
0.144 0.004 -0.231 8
0.087 0.003 -0.215 9
0.078 0.003 -0.193 7
0.029 0.005 -0.144 10
0.018 0.006 -0.09 8
0.047 0.013 -0.028 8
0.079 0.004 0.032 9
0.088 -0.008 0.06 8
0.071 -0.003 0.051 9
0.064 -0.003 0.046 8
0.037 0.023 0.013 8
0.009 0.052 -0.028 9
-0.014 0.078 -0.076 8
-0.044 0.114 -0.116 9
-0.04 0.103 -0.104 6
-0.087 0.135 -0.118 10
-0.136 0.14 -0.126 9
-0.172 0.125 -0.134 8
-0.191 0.102 -0.133 9
-0.196 0.066 -0.127 8
-0.203 0.027 -0.098 8
-0.203 -0.011 -0.067 9
-0.183 -0.01 -0.06 8
-0.162 -0.028 -0.063 8
-0.131 -0.001 -0.093 9
-0.123 0.065 -0.128 8
-0.142 0.149 -0.155 7
-0.149 0.219 -0.175 10
-0.143 0.249 -0.177 8
-0.129 0.224 -0.159 9
-0.135 0.228 -0.116 8
-0.143 0.204 -0.018 9
-0.139 0.14 0.099 8
-0.132 0.04 0.211 8
-0.133 -0.038 0.305 9
-0.137 -0.078 0.309 8
-0.123 -0.07 0.278 9
-0.122 -0.089 0.189 8
-0.134 -0.072 0.061 7
-0.154 -0.032 -0.064 10
-0.197 0.023 -0.154 8
-0.284 0.079 -0.204 9
-0.383 0.116 -0.219 8
-0.345 0.104 -0.197 8
-0.412 0.126 -0.18 9
-0.447 0.134 -0.152 8
-0.47 0.122 -0.113 9
-0.475 0.106 -0.1 8
-0.479 0.093 -0.129 8
-0.431 0.084 -0.116 9
-0.472 0.065 -0.145 6
-0.57 0.054 -0.16 10
-0.685 0.035 -0.149 9
-0.775 -0.039 -0.109 8
-0.846 -0.153 -0.052 9
-0.877 -0.243 -0.009 8
-0.789 -0.219 -0.008 8
-0.774 -0.262 -0.013 9
-0.727 -0.265 -0.067 8
-0.669 -0.252 -0.167 9
-0.611 -0.228 -0.317 8
-0.542 -0.199 -0.513 8
-0.488 -0.179 -0.462 7
-0.386 -0.164 -0.7 10
-0.231 -0.157 -0.919 9
-0.093 -0.145 -1.113 8
-0.041 -0.132 -1.257 8
-0.05 -0.121 -1.332 9
-0.013 -0.124 -1.369 8
0.219 -0.237 -1.32 9
0.197 -0.213 -1.188 8
0.188 -0.335 -1.185 8
-0.035 -0.448 -1.184 9
0.097 -0.595 -1.133 8
0.386 -0.713 -1.117 7
0.676 -0.86 -1.128 10
0.609 -0.774 -1.015 8
0.843 -1.039 -1.216 9
0.988 -1.285 -1.628 8
1.131 -1.356 -2.002 8
1.275 -1.362 -2.159 9
1.39 -1.391 -2.128 8
1.384 -1.5 -1.99 9
1.246 -1.35 -1.791 8
1.136 -1.546 -1.607 8
0.968 -1.706 -1.414 9
0.784 -1.761 -1.278 7
0.607 -1.703 -1.182 10
0.469 -1.588 -1.059 8
0.404 -1.465 -0.84 8
0.363 -1.318 -0.756 9
0.398 -1.148 -0.545 8
0.519 -0.952 -0.461 9
0.654 -0.803 -0.375 8
0.762 -0.749 -0.174 8
0.815 -0.721 -0.073 9
0.719 -0.581 -0.275 8
0.647 -0.522 -0.247 9
0.43 -0.342 -0.714 6
0.331 -0.245 -1.168 10
0.505 -0.307 -1.285 9
0.769 -0.348 -0.945 8
0.991 -0.055 -0.24 8
1.204 0.493 0.551 9
1.083 0.443 0.496 8
1.225 1.039 1.131 9
1.37 1.411 1.51 8
1.631 1.309 1.636 8
1.864 0.893 1.494 9
1.874 0.702 1.23 8
1.686 0.632 1.107 7
1.398 0.922 1.031 10
0.978 1.243 1.085 8
0.719 1.373 1.132 9
0.606 1.509 1.482 8
0.498 1.694 2.409 9
0.532 2.029 3.474 8
0.479 1.826 3.126 8
0.963 2.355 3.912 9
2.002 2.792 4.246 8
3.391 3.03 4.226 9
4.551 3.017 4.446 8
4.994 2.737 5.155 7
4.768 2.413 6.153 10
4.292 2.171 5.537 8
3.676 1.821 6.505 8
2.979 1.346 7.1 9
2.434 1.152 7.324 8
2.088 1.195 7.174 9
1.939 1.18 6.933 8
1.595 1.051 6.452 8
1.435 0.946 5.807 9
0.91 0.844 4.985 8
0.553 0.897 3.752 9
0.448 1.111 2.276 6
0.302 1.185 0.514 10
-0.06 1.191 -1.45 9
-0.704 1.42 -3.279 8
-0.633 1.278 -2.951 9
-1.567 1.531 -4.452 8
-2.026 1.485 -5.103 8
-1.557 0.817 -4.851 9
-0.863 0.062 -3.635 8
-0.269 -0.348 -1.818 9
-0.242 -0.313 -1.636 8
0.395 -0.727 0.131 8
0.975 -1.231 1.476 7
1.204 -1.503 1.894 10
0.809 -1.477 0.991 9
-0.17 -1.207 -0.901 8
-1.489 -0.685 -2.98 8
-1.34 -0.616 -2.682 9
-2.265 -0.634 -4.713 8
-2.45 -1.18 -6.238 8
-2.52 -1.428 -6.577 9
-2.522 -1.62 -5.79 8
-1.973 -2.079 -4.419 9
-0.958 -2.558 -2.957 8
-0.862 -2.302 -2.661 7
0.179 -2.551 -1.625 10
0.94 -2.499 -1.479 8
1.365 -2.231 -2.117 9
1.302 -1.842 -3.127 8
0.848 -1.341 -3.968 8
0.763 -1.206 -3.571 9
0.404 -0.538 -3.214 8
0.698 0.193 -3.137 9
1.882 0.78 -1.893 8
3.502 1.061 -0.469 8
4.746 1.117 0.709 9
4.271 1.005 0.638 6
4.961 0.606 0.937 11
5.189 -0.434 0.625 8
4.21 -1.134 0.409 8
2.015 -1.064 0.507 9
-0.262 -0.69 0.748 8
-1.905 -0.283 0.873 9
-2.248 0.135 0.95 8
-2.023 0.121 0.855 8
-1.143 0.482 0.758 9
0.092 0.716 0.324 8
0.842 0.812 -0.33 8
0.595 0.737 -1.051 7
-0.35 0.515 -1.348 10
-1.464 0.492 -0.773 9
-1.318 0.443 -0.696 8
-1.975 0.743 0.417 8
-1.344 1.177 1.551 9
0.321 1.526 2.243 8
1.975 1.577 2.243 9
2.616 1.461 1.534 8
2.354 1.315 1.38 8
1.505 1.033 1.242 9
-0.449 0.461 -1.691 8
-2.918 -0.189 -2.971 7
-5.36 -0.566 -3.46 10
-7.196 -0.658 -3.106 8
-8.013 -0.61 -1.991 9
-7.212 -0.549 -1.792 8
-6.832 -0.389 -0.135 9
-5.438 -0.127 1.611 8
-3.768 0.172 3.146 8
-2.379 0.411 3.964 9
-1.584 0.842 3.865 8
-1.395 1.285 3.041 8
-1.255 1.157 2.737 9
-1.341 1.247 1.388 7
-1.543 1.031 -0.202 10
-1.82 0.836 -1.53 8
-2.099 0.684 -2.367 8
-2.332 0.351 -2.634 9
-2.23 -0.127 -2.187 8
-2.007 -0.114 -1.968 9
-1.56 -0.694 -1.019 8
-0.899 -1.131 0.133 8
0.018 -1.212 1.151 9
0.769 -1.0 1.681 8
1.001 -0.786 1.758 9
0.901 -0.707 1.582 6
0.825 -0.654 1.44 10
0.613 -0.665 1.083 9
0.412 -0.64 0.649 8
0.281 -0.601 0.314 9
0.315 -0.553 0.1 8
0.482 -0.505 -0.091 8
0.434 -0.454 -0.082 9
0.623 -0.438 -0.159 8
0.812 -0.456 -0.044 9
0.959 -0.468 0.251 8
0.997 -0.463 0.658 8
0.909 -0.47 1.023 7
0.748 -0.465 1.2 10
0.673 -0.418 1.08 8
0.54 -0.355 0.957 9
0.459 -0.234 0.513 8
0.44 -0.119 -0.044 9
0.55 -0.024 -0.58 8
0.742 0.096 -0.986 8
0.865 0.197 -1.061 9
0.778 0.177 -0.955 8
0.79 0.212 -0.727 9
0.698 0.18 -0.337 8
0.503 0.102 0.13 7
0.276 0.019 0.531 10
0.116 -0.042 0.735 8
0.104 -0.038 0.661 9
0.033 -0.067 0.67 8
0.083 -0.076 0.463 8
0.264 -0.075 0.132 9
0.432 -0.067 -0.121 8
0.483 -0.027 -0.253 9
0.468 0.015 -0.364 8
0.421 0.013 -0.327 8
0.344 0.01 -0.404 9
0.136 -0.019 -0.349 6
-0.127 -0.054 -0.179 10
-0.341 -0.101 0.07 9
-0.493 -0.169 0.361 8
-0.562 -0.244 0.584 9
-0.506 -0.22 0.526 8
-0.495 -0.289 0.615 8
-0.377 -0.319 0.554 9
-0.2 -0.285 0.384 8
-0.042 -0.217 0.233 9
0.023 -0.174 0.135 8
-0.04 -0.158 0.12 8
-0.036 -0.142 0.108 7
-0.198 -0.122 0.193 10
-0.374 -0.106 0.276 9
-0.507 -0.111 0.286 8
-0.549 -0.116 0.202 8
-0.494 -0.117 0.087 9
-0.445 -0.106 0.078 8
-0.361 -0.097 -0.013 9
-0.29 -0.066 -0.091 8
-0.216 -0.026 -0.167 8
-0.094 0.004 -0.226 9
0.049 0.043 -0.277 8
0.044 0.039 -0.249 7
0.095 0.074 -0.286 10
0.019 0.092 -0.247 8
-0.085 0.085 -0.123 9
-0.176 0.04 0.049 8
-0.226 -0.012 0.167 8
-0.22 -0.043 0.176 9
-0.185 -0.042 0.092 8
-0.166 -0.037 0.083 9
-0.12 -0.013 -0.059 8
-0.065 0.013 -0.196 8
-0.02 0.024 -0.267 9
0.0 0.013 -0.205 7
-0.01 -0.007 -0.045 10
-0.031 -0.051 0.146 8
-0.028 -0.045 0.131 8
-0.071 -0.109 0.326 9
-0.17 -0.158 0.445 8
-0.264 -0.191 0.479 9
-0.299 -0.177 0.443 8
-0.271 -0.123 0.274 8
-0.244 -0.11 0.246 9
-0.172 -0.036 -0.021 8
-0.075 0.063 -0.278 9
0.02 0.147 -0.459 6
0.08 0.184 -0.512 10
0.09 0.194 -0.413 9
0.062 0.185 -0.141 8
0.056 0.166 -0.127 9
0.013 0.134 0.196 8
-0.037 0.083 0.406 8
-0.072 0.054 0.466 9
-0.081 0.043 0.353 8
-0.065 0.079 0.067 8
-0.098 0.196 -0.272 9
-0.088 0.177 -0.245 8
0.055 0.067 -0.52 7
0.268 -0.081 -0.623 10
0.232 0.004 -0.497 8
0.118 0.059 -0.307 9
-0.072 0.07 -0.189 8
-0.33 0.04 -0.152 9
-0.297 0.036 -0.137 8
-0.433 -0.044 -0.175 8
-0.441 -0.071 -0.228 9
-0.409 -0.017 -0.189 8
-0.286 0.024 -0.081 9
-0.108 0.023 0.057 8
-0.097 0.021 0.051 7
0.008 0.041 0.278 10
0.039 0.078 0.46 8
0.071 0.069 0.502 9
0.039 -0.056 0.412 8
-0.043 -0.147 0.377 8
-0.17 -0.103 0.505 9
-0.153 -0.093 0.455 8
-0.467 -0.001 0.521 8
-0.661 0.072 0.506 9
-0.459 0.042 0.451 8
-0.079 -0.002 0.226 9
0.202 -0.407 -0.228 6
0.049 -1.038 -0.226 10
0.044 -0.935 -0.203 9
-0.373 -1.09 0.429 8
-0.62 -0.895 0.675 9
-0.671 -0.482 0.575 8
-0.6 0.025 0.736 8
-0.398 0.171 0.971 9
-0.075 0.0 0.914 8
-0.068 0.0 0.822 9
0.333 -0.192 0.458 8
0.807 -0.434 0.06 8
1.229 -0.701 -0.231 7
1.36 -0.778 -0.389 10
1.075 -0.626 -0.52 9
0.968 -0.564 -0.468 8
0.518 -0.297 -0.619 8
0.094 -0.108 -0.732 9
-0.316 -0.039 -0.756 8
-0.609 0.0 -0.606 9
-0.724 -0.008 -0.311 8
-0.713 -0.121 0.032 8
-0.641 -0.109 0.029 9
-0.578 -0.313 0.341 8
-0.513 -0.455 0.557 7
-0.493 -0.338 0.633 10
-0.49 -0.062 0.512 8
-0.454 0.109 0.243 9
-0.414 0.164 -0.033 8
-0.372 0.148 -0.029 8
-0.336 0.117 -0.136 9
-0.316 0.094 -0.024 8
-0.302 0.064 0.187 9
-0.09 -0.267 0.285 8
0.272 -0.769 0.465 8
0.321 -0.801 0.828 9
0.289 -0.721 0.745 7
0.131 -0.599 0.873 10
0.015 -0.585 0.792 8
-0.089 -0.421 0.658 8
-0.177 -0.23 0.321 9
-0.154 -0.003 -0.123 8
-0.138 -0.002 -0.111 9
0.136 0.156 -0.512 8
0.392 0.17 -0.69 8
0.294 0.113 -0.485 9
-0.099 0.0 -0.077 8
-0.574 -0.136 0.274 9
-0.516 -0.122 0.247 6
-0.9 -0.196 0.296 10
-1.079 -0.293 0.095 9
-1.084 -0.431 -0.097 8
-0.917 -0.505 -0.172 8
-0.536 -0.545 -0.154 9
-0.076 -0.639 -0.036 8
0.237 -0.713 0.088 9
0.214 -0.641 0.079 8
0.285 -0.557 0.141 8
0.197 -0.36 0.173 9
0.089 -0.062 0.07 8
0.034 0.331 -0.19 7
0.086 0.642 -0.543 10
0.259 0.791 -0.549 8
0.233 0.712 -0.494 9
0.269 0.762 -0.127 8
0.149 0.684 0.142 9
0.228 0.506 0.346 8
0.488 0.324 0.48 8
0.708 0.265 0.459 9
0.637 0.238 0.413 8
0.74 0.295 0.264 8
0.736 0.339 0.026 9
0.606 0.342 -0.193 7
0.368 0.324 -0.312 10
0.125 0.297 -0.35 8
0.069 0.257 -0.336 8
0.062 0.231 -0.302 9
0.202 0.21 -0.343 8
0.339 0.203 -0.509 9
0.323 0.198 -0.682 8
0.146 0.188 -0.778 8
-0.134 0.165 -0.774 9
-0.443 0.137 -0.647 8
-0.399 0.124 -0.582 9
-0.665 0.124 -0.355 6
-0.894 0.113 -0.332 10
-1.046 0.095 -0.329 9
-1.095 0.157 -0.113 8
-1.059 0.209 0.027 9
-0.986 0.18 0.101 8
-0.887 0.162 0.091 8
-0.859 0.09 0.219 9
-0.838 -0.058 0.472 8
-0.768 -0.276 0.737 9
-0.648 -0.411 0.885 8
-0.48 -0.428 0.918 8
-0.432 -0.386 0.826 7
-0.245 -0.373 0.746 10
-0.022 -0.337 0.66 9
0.141 -0.236 0.4 8
0.221 -0.159 -0.023 8
0.246 -0.167 -0.228 9
0.205 -0.207 -0.198 8
0.184 -0.186 -0.179 9
0.204 -0.235 0.0 8
0.291 -0.301 0.234 8
0.433 -0.372 0.428 9
0.672 -0.368 0.531 8
0.924 -0.301 0.516 7
1.054 -0.238 0.381 10
# end
#Thu Feb 26 20:39:18 GMT+08:00 20157
