# Supplementary material for: Abnormal Gait Behavior Detection for Elderly Based on Enhanced Wigner-Ville Analysis and Cloud Incremental SVM Learning
Source: Hindawi journal article supplement (doi:10.1155/2016/5869238), 2016-01-01
Supplement: f1 [file 5869238.f1.zip › Supplementary Materials/Original Data/Leftward fall Ending recovery/original__121.txt]

# Accelerometer Values
# filename:  original__121.txt
# Saving start time: Thu Feb 26 20:39:22 GMT+08:00 2015

# sensor resolution: 0.0095825195m/s^2
#Sensorvendor: KIONIX, name: KX023 Accelerometer, type: 1,version : 1, range 39.240005

# X value, Y value, Z value, time diff in ms
-0.199 -0.004 -0.295 8
-0.153 0.016 -0.395 8
-0.138 0.014 -0.356 9
-0.084 0.009 -0.341 8
-0.058 -0.04 -0.231 8
-0.061 -0.106 -0.026 7
-0.069 -0.148 0.219 10
-0.066 -0.172 0.4 9
-0.059 -0.169 0.422 8
-0.053 -0.152 0.38 8
-0.045 -0.131 0.251 9
-0.03 -0.115 0.053 8
0.009 -0.091 -0.128 9
0.082 -0.057 -0.257 8
0.171 -0.03 -0.303 8
0.22 -0.021 -0.25 9
0.198 -0.018 -0.225 8
0.181 -0.025 -0.081 7
0.113 -0.041 0.112 10
0.03 -0.062 0.26 8
-0.031 -0.07 0.305 9
-0.06 -0.062 0.235 8
-0.07 -0.048 0.094 9
-0.063 -0.044 0.084 8
-0.058 -0.028 -0.06 8
-0.014 -0.008 -0.173 9
0.07 -0.001 -0.226 8
0.133 0.0 -0.206 8
0.12 0.0 -0.111 9
0.108 0.0 -0.1 7
0.05 0.011 0.014 10
0.0 0.024 0.098 8
-0.011 0.012 0.121 8
-0.022 0.008 0.1 9
-0.049 0.023 0.067 8
-0.074 0.036 0.025 9
-0.067 0.033 0.023 8
-0.071 0.032 -0.026 8
-0.031 0.015 -0.078 9
0.06 0.017 -0.11 8
0.16 0.024 -0.102 9
0.206 0.011 -0.069 6
0.183 -0.006 -0.02 10
0.165 -0.005 -0.018 9
0.097 -0.015 0.03 8
0.017 -0.006 0.064 9
-0.033 0.002 0.062 8
-0.038 0.0 0.027 8
-0.05 -0.008 -0.02 9
-0.064 -0.01 -0.066 8
-0.058 -0.009 -0.06 9
-0.035 -0.005 -0.094 8
0.002 -0.001 -0.111 8
0.003 -0.01 -0.105 7
-0.044 -0.027 -0.074 10
-0.093 -0.023 -0.042 8
-0.084 -0.021 -0.038 9
-0.084 -0.008 -0.045 8
-0.057 -0.022 -0.07 9
-0.069 -0.047 -0.064 8
-0.119 -0.057 -0.013 8
-0.169 -0.052 0.045 9
-0.186 -0.046 0.07 8
-0.167 -0.041 0.063 9
-0.147 -0.04 0.054 8
-0.121 -0.036 0.041 7
-0.11 -0.025 0.056 10
-0.096 -0.019 0.093 8
-0.061 -0.025 0.122 9
-0.025 -0.034 0.137 8
-0.022 -0.031 0.123 8
-0.006 -0.034 0.134 9
-0.014 -0.031 0.133 8
-0.025 -0.013 0.1 9
-0.022 -0.005 0.032 8
-0.014 -0.005 -0.031 8
-0.013 -0.006 -0.049 9
-0.016 -0.005 -0.044 6
-0.023 0.002 -0.023 10
-0.032 0.027 0.002 9
-0.058 0.051 0.014 8
-0.126 0.07 0.023 9
-0.24 0.096 0.039 8
-0.216 0.086 0.035 8
-0.334 0.094 0.031 9
-0.445 0.063 -0.004 8
-0.582 0.014 -0.041 9
-0.725 -0.023 0.035 8
-0.812 -0.052 0.263 8
-0.731 -0.047 0.237 7
-0.755 -0.073 0.371 10
-0.751 -0.089 0.226 9
-0.758 -0.09 -0.076 8
-0.798 -0.079 -0.323 8
-0.837 -0.068 -0.458 9
-0.822 -0.081 -0.524 8
-0.827 -0.142 -0.523 9
-0.744 -0.128 -0.47 8
-0.829 -0.212 -0.424 8
-0.815 -0.275 -0.319 9
-0.439 -0.309 -0.133 8
-0.325 -0.454 -0.188 7
-0.67 -0.641 -0.43 10
-0.603 -0.577 -0.387 8
-0.758 -0.543 -0.412 9
-0.708 -0.433 -0.396 8
-0.562 -0.443 -0.576 8
-0.48 -0.416 -0.883 9
-0.492 -0.187 -1.265 8
-0.464 0.079 -1.606 9
-0.418 0.071 -1.446 8
-0.379 0.212 -1.69 8
-0.341 0.286 -1.87 9
-0.249 0.311 -1.963 7
0.017 0.295 -2.001 10
0.431 0.215 -2.097 8
0.936 -0.021 -2.21 8
0.842 -0.019 -1.989 9
1.307 -0.265 -2.111 8
1.552 -0.266 -2.174 9
1.594 -0.134 -2.09 8
1.453 -0.041 -1.924 8
1.23 -0.067 -1.707 9
1.107 -0.24 -1.508 8
0.996 -0.216 -1.357 9
0.641 -0.451 -1.256 6
0.532 -0.711 -1.184 10
0.553 -0.943 -1.155 9
0.703 -1.092 -1.263 8
0.966 -1.195 -1.452 9
0.869 -1.076 -1.307 8
1.056 -1.127 -1.421 8
0.839 -1.066 -1.178 9
0.223 -0.863 -0.526 8
-0.366 -0.643 0.332 8
-0.7 -0.593 0.991 9
-0.781 -0.523 1.04 8
-0.703 -0.47 0.936 7
-0.602 -0.398 0.517 10
-0.494 -0.47 0.022 8
-0.252 -0.443 -0.181 9
0.13 -0.308 0.049 8
0.533 -0.486 0.565 9
0.964 -1.045 1.137 8
0.868 -0.941 1.023 8
1.096 -1.312 1.442 9
1.068 -1.294 1.569 8
0.96 -1.171 1.508 9
0.841 -0.912 1.124 8
0.757 -0.82 1.011 7
0.779 -0.378 0.517 10
1.021 -0.015 0.413 8
1.419 0.17 0.586 9
2.03 0.307 1.171 8
2.855 0.446 2.11 8
3.612 0.466 2.859 9
4.101 0.276 3.314 8
3.691 0.249 2.983 8
3.908 -0.035 3.171 9
3.763 -0.179 2.726 8
3.273 0.24 1.842 9
2.735 1.057 0.895 6
2.703 1.653 0.214 10
3.229 2.088 0.276 9
2.906 1.879 0.248 8
3.592 2.243 1.042 9
4.253 2.401 2.321 8
4.674 2.547 3.708 8
4.742 2.488 4.783 9
4.568 2.321 5.221 8
4.032 2.367 4.922 9
3.628 2.13 4.429 8
2.913 2.221 3.587 8
2.302 2.254 2.438 7
1.881 2.337 1.47 10
1.751 2.236 0.808 9
1.859 1.895 0.41 8
1.673 1.706 0.369 8
1.741 1.381 0.253 9
1.457 1.059 0.223 8
0.681 0.841 0.216 9
-0.165 0.507 0.12 8
-0.833 0.039 -0.234 8
-1.47 -0.255 -0.775 9
-1.323 -0.229 -0.697 8
-1.931 -0.397 -1.147 7
-2.342 -0.606 -1.347 10
-2.481 -0.649 -1.32 8
-1.844 -0.726 -1.166 9
0.089 -1.493 -1.034 8
1.953 -2.316 -0.749 8
1.758 -2.085 -0.674 9
2.247 -2.095 -0.082 8
1.566 -1.498 0.525 9
0.334 -0.864 0.858 8
-0.954 -0.322 0.659 8
-2.268 0.274 -0.144 9
-2.042 0.247 -0.13 7
-2.95 0.744 -1.154 10
-2.903 0.68 -2.353 8
-2.628 0.317 -3.728 8
-2.543 -0.162 -4.443 9
-2.071 -1.091 -3.433 8
-1.288 -2.004 -0.914 9
-1.159 -1.803 -0.823 8
-0.499 -2.402 1.936 8
0.05 -2.575 3.98 9
0.834 -2.829 4.866 8
1.625 -3.026 4.444 9
1.755 -2.669 2.694 6
1.573 -2.429 0.026 10
1.416 -2.186 0.024 9
1.169 -2.189 -2.813 8
0.932 -2.184 -4.809 8
0.994 -2.15 -5.3 9
1.143 -2.005 -4.449 8
1.299 -1.82 -2.893 9
1.499 -1.707 -1.229 8
1.349 -1.537 -1.106 8
1.655 -1.502 0.28 9
2.003 -1.401 1.112 8
2.116 -1.156 1.276 7
1.662 -0.844 0.701 10
1.005 -0.579 -0.283 8
0.332 -0.423 -1.252 9
0.299 -0.38 -1.127 8
-0.383 -0.218 -1.927 9
-0.696 0.014 -2.437 8
-0.569 0.43 -2.508 8
0.045 0.97 -2.221 9
0.92 1.507 -1.833 8
0.828 1.356 -1.65 8
1.414 1.901 -1.118 9
1.425 2.282 -0.496 7
0.968 2.43 0.126 10
0.288 2.412 0.731 8
-0.289 2.25 1.295 8
-0.626 1.971 1.705 9
-0.564 1.774 1.534 8
-0.562 1.423 1.656 9
-0.076 1.016 1.533 8
0.633 0.614 1.342 8
0.989 0.207 1.228 9
0.648 -0.165 1.13 8
-0.236 -0.411 0.943 9
-0.213 -0.37 0.848 6
-1.252 -0.533 0.564 10
-2.2 -0.71 0.224 9
-2.931 -0.936 -0.089 8
-3.401 -1.132 -0.435 9
-3.629 -1.283 -0.824 8
-3.266 -1.154 -0.742 8
-3.409 -1.329 -1.082 9
-3.417 -1.461 -1.445 8
-3.099 -1.527 -1.805 9
-2.607 -1.472 -1.901 8
-2.277 -1.31 -1.757 8
-2.05 -1.179 -1.581 7
-2.047 -0.993 -1.419 10
-2.268 -0.715 -1.255 9
-2.508 -0.379 -1.175 8
-2.541 -0.018 -1.347 8
-2.443 0.43 -1.735 9
-1.916 0.662 -2.058 8
-1.15 0.711 -2.205 8
-1.035 0.64 -1.984 9
-0.622 0.879 -2.046 8
-0.442 1.214 -2.076 9
-0.364 1.546 -2.091 8
-0.238 1.861 -1.945 7
-0.102 2.052 -1.449 10
0.011 2.074 -0.558 8
0.01 1.867 -0.502 9
0.251 1.837 0.594 8
0.604 1.845 1.605 8
0.867 1.849 2.216 9
0.978 1.773 2.267 8
0.958 1.668 1.729 9
0.862 1.501 0.933 8
0.791 1.408 0.84 8
0.683 1.332 0.273 9
0.475 1.277 0.024 6
0.324 1.223 0.111 11
0.412 1.119 0.443 8
0.716 0.95 0.766 8
0.645 0.855 0.69 9
1.026 0.703 0.803 8
1.242 0.513 0.6 8
1.27 0.227 0.221 9
1.28 -0.14 -0.045 8
1.358 -0.539 -0.213 9
1.165 -0.833 -0.477 8
1.048 -0.75 -0.429 8
0.706 -1.0 -0.58 7
0.447 -1.331 -0.572 10
0.158 -1.435 -0.565 9
0.048 -1.332 -0.473 8
-0.09 -1.175 -0.269 8
-0.04 -1.134 0.029 9
-0.036 -1.021 0.026 8
0.115 -1.127 0.405 9
0.19 -1.118 0.877 8
0.551 -1.103 1.299 8
0.909 -1.047 1.447 9
1.176 -0.926 1.387 8
1.059 -0.833 1.249 7
1.022 -0.647 0.88 10
0.682 -0.405 0.192 8
0.373 -0.178 -0.363 9
0.101 0.023 -0.63 8
-0.122 0.151 -0.695 8
-0.13 0.058 -0.654 9
-0.117 0.052 -0.588 8
0.122 -0.157 -0.528 9
0.666 -0.298 -0.398 8
1.134 -0.381 -0.235 8
1.07 -0.432 -0.236 9
0.734 -0.471 -0.271 7
0.39 -0.507 -0.097 10
0.351 -0.456 -0.088 8
0.243 -0.542 0.224 8
0.361 -0.694 0.472 9
0.407 -0.834 0.499 8
0.182 -0.922 0.219 9
-0.183 -1.02 -0.176 8
-0.388 -1.029 -0.425 8
-0.349 -0.926 -0.382 9
-0.416 -0.873 -0.51 8
-0.408 -0.885 -0.473 9
-0.283 -0.973 -0.129 6
-0.146 -1.129 0.402 10
-0.012 -1.07 1.013 9
-0.011 -0.963 1.507 8
-0.085 -0.866 1.356 9
-0.2 -0.356 1.456 8
0.001 -0.547 1.288 8
0.226 -0.42 1.033 9
0.383 -0.101 0.641 8
0.576 0.196 0.199 8
0.518 0.176 0.179 9
0.636 0.53 -0.101 8
0.488 0.864 -0.268 7
0.094 1.204 -0.275 10
-0.251 1.499 -0.102 8
-0.496 1.66 0.125 9
-0.675 1.755 0.424 8
-0.608 1.579 0.381 9
-0.694 1.595 0.703 8
-0.705 1.445 0.975 8
-0.711 1.238 1.219 9
-0.867 1.16 1.422 8
-1.181 1.234 1.477 9
-1.359 1.453 1.32 8
-1.223 1.308 1.188 7
-1.002 1.692 1.089 10
-0.584 2.135 1.106 8
-0.307 2.311 1.025 9
-0.305 2.222 1.011 8
-0.858 2.244 1.102 8
-1.765 2.134 1.419 9
-1.588 1.921 1.277 8
-2.671 1.443 1.709 9
-3.369 1.578 2.541 8
-3.158 2.351 3.733 8
-2.427 2.578 4.319 9
-2.185 2.32 3.887 6
-1.309 1.84 3.76 10
-0.441 0.974 3.21 9
0.388 0.015 2.453 8
1.173 -0.857 1.707 9
1.805 -1.512 1.367 8
2.107 -2.104 1.534 8
2.006 -2.525 1.987 9
1.805 -2.272 1.789 8
1.185 -2.324 2.144 9
0.186 -1.944 2.058 8
-0.696 -1.421 1.639 8
-1.101 -0.989 1.634 7
-1.11 -0.622 1.92 10
-1.009 -0.536 1.623 9
-0.908 -0.482 1.461 8
-0.87 -0.68 1.037 8
-1.046 -0.703 1.02 9
-1.285 -0.441 1.042 8
-1.142 -0.216 0.684 9
-0.628 -0.146 -0.134 8
-0.217 -0.037 -1.199 8
-0.196 -0.034 -1.079 9
-0.072 0.052 -2.076 8
-0.338 0.173 -2.641 7
-1.064 0.345 -2.759 10
-1.928 0.213 -2.675 8
-2.629 -0.21 -2.455 9
-2.366 -0.189 -2.21 8
-2.854 -0.596 -1.907 8
-3.056 -0.539 -1.63 9
-2.969 -0.056 -1.421 8
-2.553 0.155 -1.323 9
-2.071 0.099 -1.415 8
-1.899 0.236 -1.503 8
-1.709 0.213 -1.353 9
-1.797 0.403 -1.295 7
-1.963 0.483 -1.16 10
-2.041 0.498 -1.077 8
-1.881 0.483 -1.093 8
-1.456 0.454 -1.195 9
-0.978 0.418 -1.395 8
-0.88 0.376 -1.255 9
-0.589 0.345 -1.425 8
-0.519 0.341 -1.441 8
-0.637 0.364 -1.365 9
-0.83 0.381 -1.229 8
-0.99 0.4 -1.0 9
-0.891 0.36 -0.9 6
-0.667 0.156 -0.742 10
-0.067 -0.278 -0.859 9
0.192 -0.327 -1.138 8
-0.079 0.124 -1.407 8
-0.512 0.591 -1.665 9
-0.898 0.694 -1.943 8
-0.982 0.356 -2.183 9
-0.884 0.32 -1.965 8
-0.76 -0.029 -2.107 8
-0.694 -0.1 -2.121 9
-0.622 -0.062 -1.969 8
-0.507 -0.021 -1.753 7
-0.286 0.006 -1.56 10
-0.257 0.005 -1.404 8
0.013 -0.003 -1.255 9
0.2 -0.02 -1.129 8
0.248 -0.046 -1.024 9
0.178 -0.147 -0.941 8
0.084 -0.302 -0.879 8
0.008 -0.455 -0.986 9
0.008 -0.41 -0.887 8
-0.035 -0.544 -1.038 9
-0.146 -0.569 -0.994 8
-0.19 -0.509 -0.961 7
-0.093 -0.491 -0.993 10
-0.12 -0.485 -0.973 8
-0.255 -0.444 -0.842 9
-0.229 -0.399 -0.758 8
-0.375 -0.327 -0.574 8
-0.519 -0.195 -0.498 9
-0.624 -0.034 -0.633 8
-0.688 0.081 -0.917 8
-0.514 -0.029 -1.163 9
-0.463 -0.026 -1.047 8
-0.195 -0.243 -1.246 9
-0.312 -0.182 -1.321 6
-0.682 0.082 -0.942 10
-1.0 0.288 -0.3 9
-1.085 0.394 0.109 8
-0.817 0.413 0.273 9
-0.736 0.372 0.245 8
-0.237 0.341 0.256 8
0.286 0.31 0.138 9
0.592 0.314 0.006 8
0.554 0.414 -0.009 9
0.381 0.446 0.159 8
0.277 0.307 0.339 8
0.249 0.276 0.305 7
0.157 0.169 0.457 10
0.099 0.135 0.759 9
0.151 0.117 1.129 8
0.356 0.106 1.458 8
0.62 0.096 1.809 9
0.771 0.082 2.092 8
0.694 0.074 1.883 9
0.727 0.052 1.982 8
0.626 0.023 1.895 8
0.35 0.011 1.673 9
-0.028 0.026 1.45 8
-0.025 0.023 1.305 7
-0.461 0.06 1.23 10
-0.832 0.128 1.144 8
-0.989 0.172 0.89 9
-0.968 0.196 0.571 8
-0.767 0.247 0.244 8
-0.363 0.256 -0.043 9
0.139 0.262 -0.281 8
0.125 0.235 -0.253 9
0.512 0.312 -0.423 8
0.665 0.459 -0.466 8
0.612 0.631 -0.356 9
0.39 0.735 -0.1 7
0.165 0.705 0.185 10
-0.058 0.64 0.358 8
-0.052 0.576 0.322 8
-0.296 0.505 0.418 9
-0.435 0.348 0.491 8
-0.375 0.197 0.515 9
-0.202 0.212 0.368 8
0.066 0.338 0.11 8
0.455 0.484 -0.103 9
0.409 0.435 -0.093 8
0.643 0.676 -0.244 8
0.569 0.889 -0.287 7
0.287 1.012 -0.222 10
-0.065 1.058 -0.132 9
-0.415 1.029 -0.145 8
-0.374 0.926 -0.131 8
-0.516 0.856 -0.204 9
-0.322 0.722 -0.327 8
0.067 0.559 -0.498 9
0.407 0.42 -0.572 8
0.464 0.28 -0.432 8
0.222 0.072 -0.099 9
0.199 0.065 -0.089 8
-0.197 -0.17 0.322 7
-0.562 -0.34 0.664 10
-0.768 -0.441 0.84 8
-0.809 -0.467 0.878 9
-0.699 -0.461 0.85 8
-0.402 -0.497 0.753 9
-0.361 -0.447 0.678 8
-0.032 -0.397 0.549 8
0.237 -0.263 0.322 9
0.493 -0.156 -0.053 8
0.521 0.023 -0.353 8
0.3 0.253 -0.44 9
0.27 0.228 -0.396 7
-0.051 0.371 -0.196 10
-0.303 0.377 0.204 8
-0.268 0.311 0.573 9
-0.012 0.247 0.808 8
0.301 0.082 0.871 8
0.489 -0.127 0.87 9
0.44 -0.114 0.783 8
0.468 -0.224 0.796 8
0.5 -0.274 0.692 9
0.567 -0.28 0.513 8
0.621 -0.247 0.361 9
0.621 -0.216 0.233 6
# end
#Thu Feb 26 20:39:26 GMT+08:00 20152
