# Supplementary material for: Abnormal Gait Behavior Detection for Elderly Based on Enhanced Wigner-Ville Analysis and Cloud Incremental SVM Learning
Source: Hindawi journal article supplement (doi:10.1155/2016/5869238), 2016-01-01
Supplement: f1 [file 5869238.f1.zip › Supplementary Materials/Original Data/Leftward fall Ending recovery/original__122.txt]

# Accelerometer Values
# filename:  original__122.txt
# Saving start time: Thu Feb 26 20:39:29 GMT+08:00 2015

# sensor resolution: 0.0095825195m/s^2
#Sensorvendor: KIONIX, name: KX023 Accelerometer, type: 1,version : 1, range 39.240005

# X value, Y value, Z value, time diff in ms
-0.243 -0.108 -0.525 8
-0.227 -0.081 -0.609 7
-0.194 -0.043 -0.7 10
-0.174 -0.039 -0.63 8
-0.093 -0.006 -0.66 9
0.009 -0.032 -0.548 8
0.04 -0.126 -0.229 9
0.009 -0.254 0.154 8
0.029 -0.371 0.46 8
0.152 -0.459 0.709 9
0.137 -0.413 0.638 8
0.295 -0.449 0.792 8
0.369 -0.415 0.79 9
0.413 -0.359 0.733 7
0.566 -0.382 0.712 10
0.507 -0.282 0.666 8
0.23 0.047 0.699 8
0.207 0.042 0.629 9
0.118 0.187 0.538 8
0.075 0.064 0.12 9
-0.092 -0.046 -0.31 8
-0.292 -0.055 -0.678 8
-0.555 0.03 -0.94 9
-0.499 0.027 -0.846 8
-0.809 0.153 -0.969 9
-0.946 0.199 -1.023 6
-0.794 0.17 -0.975 10
-0.387 0.095 -0.853 9
0.043 0.008 -0.718 8
0.268 -0.033 -0.534 9
0.241 -0.03 -0.481 8
0.296 -0.043 -0.362 8
0.209 -0.036 -0.382 9
0.05 -0.063 -0.343 8
-0.104 -0.13 -0.166 9
-0.313 -0.233 0.005 8
-0.435 -0.355 0.016 8
-0.391 -0.32 0.014 7
-0.262 -0.391 -0.13 10
0.08 -0.414 -0.287 8
0.433 -0.427 -0.498 9
0.652 -0.467 -0.612 8
0.747 -0.501 -0.511 9
0.702 -0.547 -0.572 8
0.632 -0.492 -0.515 8
0.463 -0.561 -0.686 9
0.235 -0.542 -0.636 8
-0.004 -0.493 -0.505 9
-0.199 -0.509 -0.604 8
-0.179 -0.458 -0.543 7
-0.176 -0.396 -0.738 10
0.009 -0.176 -0.77 8
0.222 0.065 -0.593 9
0.47 0.122 -0.281 8
0.695 -0.209 -0.149 8
0.873 -0.558 -0.11 9
0.988 -0.686 0.069 8
0.889 -0.617 0.062 9
0.798 -0.775 0.229 8
0.517 -0.922 0.275 8
0.158 -0.944 0.14 9
0.004 -0.972 -0.212 6
0.101 -1.033 -0.775 11
0.189 -1.049 -1.494 8
0.17 -0.944 -1.345 8
0.201 -0.989 -1.893 9
0.169 -1.02 -2.071 8
0.065 -1.023 -2.026 8
-0.02 -1.072 -1.829 9
-0.051 -1.113 -1.488 8
-0.053 -1.025 -1.173 9
-0.048 -0.923 -1.056 8
0.041 -0.742 -0.976 8
0.259 -0.581 -1.03 7
0.415 -0.474 -1.061 10
0.493 -0.318 -1.037 9
0.702 -0.203 -0.999 8
0.632 -0.183 -0.899 8
0.956 -0.081 -0.936 9
1.361 0.167 -0.957 8
1.863 0.494 -0.844 9
2.386 0.757 -0.631 8
2.772 0.87 -0.258 8
2.881 0.963 0.236 9
2.593 0.866 0.212 8
2.439 0.992 0.53 7
2.158 1.031 0.59 10
1.936 1.075 0.483 8
1.79 1.343 0.298 9
1.744 1.931 0.104 8
2.165 2.353 -0.175 9
1.948 2.118 -0.157 8
2.813 2.128 -0.389 8
3.547 2.049 -0.122 9
3.974 1.981 0.718 8
4.048 1.82 1.808 8
3.723 1.576 2.967 9
3.351 1.418 2.67 7
2.813 1.299 3.75 10
2.162 1.309 4.539 8
1.659 1.329 5.008 8
1.709 1.299 5.218 9
2.193 1.212 5.193 8
2.684 1.1 5.045 9
2.415 0.99 4.541 8
2.581 0.886 4.379 8
2.203 0.757 3.95 9
1.217 0.68 3.137 8
0.027 0.735 1.993 9
-0.917 0.751 0.665 6
-1.472 0.726 -0.622 10
-1.325 0.654 -0.56 9
-1.27 0.707 -1.626 8
-0.672 0.926 -2.242 9
0.489 1.015 -2.018 8
2.069 0.403 -0.918 8
2.964 -0.273 0.604 9
2.556 -0.281 1.967 8
2.3 -0.253 1.77 9
1.346 -0.127 2.721 8
0.338 -0.265 3.065 8
-0.305 -0.379 2.726 7
-0.166 -0.371 2.088 10
0.212 -0.293 1.268 8
0.191 -0.264 1.142 9
0.409 -0.434 0.157 8
0.576 -1.182 -0.769 9
0.623 -2.198 -1.261 8
0.346 -2.97 -1.053 8
-0.288 -3.457 -0.398 9
-0.865 -3.777 0.455 8
-0.778 -3.399 0.409 9
-0.935 -3.504 1.434 8
-0.788 -3.31 2.235 7
-0.224 -2.938 2.518 10
0.657 -2.598 2.195 8
1.605 -2.352 1.567 9
2.551 -2.074 1.266 8
2.296 -1.866 1.14 8
2.979 -1.378 1.271 9
3.012 -0.546 1.28 8
2.784 0.084 1.066 9
2.909 -0.179 0.544 8
3.09 -1.041 -0.503 8
2.781 -1.85 -1.801 9
2.503 -1.665 -1.621 6
1.315 -1.727 -2.979 10
-0.768 -1.352 -4.119 9
-2.465 -1.496 -4.862 8
-3.637 -1.777 -5.082 9
-4.338 -1.704 -4.725 8
-3.905 -1.534 -4.252 8
-3.892 -1.321 -3.623 9
-3.197 -1.119 -3.084 8
-2.3 -0.972 -2.714 9
-1.707 -0.773 -2.414 8
-1.488 -0.491 -2.161 8
-1.34 -0.442 -1.944 7
-1.507 -0.157 -1.752 10
-1.878 0.084 -1.574 9
-2.084 0.234 -1.405 8
-1.943 0.333 -1.257 8
-1.626 0.455 -1.175 9
-1.293 0.571 -1.34 8
-0.952 0.63 -1.724 9
-0.857 0.567 -1.551 8
-0.605 0.543 -1.675 8
-0.523 0.539 -1.28 9
-0.631 0.604 -0.663 8
-0.814 0.616 -0.037 7
-1.007 0.614 0.55 10
-0.906 0.637 1.008 8
-1.035 0.573 0.907 9
-1.014 0.573 1.175 8
-0.903 0.527 1.209 8
-0.715 0.487 0.976 9
-0.499 0.47 0.713 8
-0.407 0.272 0.603 9
-0.367 0.245 0.543 8
-0.201 0.135 0.65 8
-0.01 0.29 0.797 9
-0.034 0.39 0.622 7
-0.162 0.421 0.317 10
-0.353 0.412 0.096 8
-0.539 0.392 -0.037 8
-0.485 0.353 -0.033 9
-0.68 0.343 -0.061 8
-0.693 0.274 0.119 9
-0.402 0.183 0.503 8
-0.17 -0.03 0.805 8
-0.037 -0.113 1.048 9
0.065 0.073 1.164 8
0.058 0.066 1.047 9
0.041 0.132 0.853 6
0.068 0.127 0.576 10
0.232 0.142 0.334 9
0.447 0.133 0.024 8
0.5 0.062 -0.297 8
0.341 -0.074 -0.537 9
0.307 -0.067 -0.484 8
0.093 -0.273 -0.67 9
-0.194 -0.49 -0.748 8
-0.527 -0.606 -0.71 8
-0.743 -0.597 -0.634 9
-0.814 -0.454 -0.501 8
-0.732 -0.409 -0.451 7
-0.608 -0.218 -0.258 10
-0.25 -0.027 0.073 8
0.078 0.171 0.483 9
0.155 0.335 0.717 8
0.066 0.514 0.608 9
-0.047 0.7 0.193 8
-0.042 0.63 0.174 8
-0.195 0.756 -0.3 9
-0.374 0.813 -0.57 8
-0.497 0.82 -0.531 9
-0.603 0.793 -0.228 8
-0.727 0.767 0.268 7
-0.844 0.777 0.854 10
-0.76 0.699 0.769 8
-0.828 0.727 1.305 9
-0.768 0.761 1.596 8
-0.635 0.811 1.729 8
-0.595 0.884 1.879 9
-0.715 0.964 2.052 8
-0.882 1.022 2.283 8
-0.794 0.92 2.055 9
-0.893 0.988 2.288 8
-0.886 1.07 2.529 9
-0.75 1.202 2.782 6
-0.543 1.335 3.054 10
-0.401 1.391 3.409 9
-0.361 1.252 3.068 8
-0.237 1.177 3.427 9
-0.005 0.968 3.728 8
0.227 0.803 4.064 8
0.387 0.715 4.44 9
0.661 0.658 4.648 8
1.085 0.667 4.59 9
0.977 0.6 4.131 8
1.441 0.65 3.96 8
1.828 0.657 3.676 7
2.019 0.635 3.337 10
2.004 0.577 3.025 9
1.854 0.438 2.719 8
1.578 0.249 2.353 8
1.42 0.224 2.118 9
0.972 0.066 1.653 8
0.487 0.032 0.953 9
0.156 0.087 0.002 8
-0.053 0.14 -1.112 8
-0.262 0.154 -2.205 9
-0.509 0.066 -3.111 8
-0.458 0.059 -2.8 7
-0.675 -0.117 -3.474 10
-0.87 -0.334 -3.815 8
-1.343 -0.49 -3.81 9
-2.026 -0.497 -3.58 8
-2.508 -0.48 -3.218 8
-2.257 -0.516 -2.629 9
-2.031 -0.465 -2.366 8
-2.477 -0.574 -1.701 9
-2.383 -0.711 -1.168 8
-2.466 -0.778 -0.892 8
-2.692 -0.78 -1.051 9
-2.423 -0.702 -0.946 6
-2.608 -0.646 -1.485 11
-2.633 -0.46 -2.036 8
-2.58 -0.196 -2.366 8
-2.462 -0.057 -2.35 9
-2.37 -0.079 -2.031 8
-2.224 -0.232 -1.588 9
-1.931 -0.494 -1.095 8
-1.737 -0.445 -0.985 8
-1.46 -0.718 -0.572 9
-1.316 -0.857 -0.303 8
-1.345 -0.838 -0.152 8
-1.375 -0.693 -0.105 7
-1.195 -0.455 -0.146 10
-0.875 -0.227 -0.428 9
-0.787 -0.204 -0.385 8
-0.526 -0.035 -1.051 8
-0.463 0.088 -1.87 9
-0.496 -0.06 -2.647 8
-0.685 -0.502 -3.167 9
-1.176 -0.852 -3.276 8
-1.769 -0.995 -3.134 8
-1.592 -0.895 -2.82 9
-2.093 -0.93 -2.61 8
-2.309 -0.879 -2.358 7
-2.21 -0.756 -2.15 10
-1.724 -0.358 -2.041 8
-0.877 0.341 -2.092 9
-0.789 0.306 -1.883 8
-0.073 0.787 -2.403 9
0.387 1.002 -2.861 8
0.764 1.117 -2.849 8
0.786 0.99 -2.88 9
0.5 0.658 -2.997 8
0.175 0.178 -2.941 8
0.158 0.16 -2.647 9
-0.253 -0.382 -2.295 7
-0.922 -0.857 -1.798 10
-1.425 -1.05 -1.04 8
-1.357 -1.001 -0.026 8
-1.005 -0.918 0.845 9
-0.541 -0.819 1.389 8
-0.487 -0.737 1.25 9
0.125 -0.655 1.443 8
0.832 -0.605 1.566 8
1.296 -0.556 1.772 9
1.285 -0.507 2.005 8
0.868 -0.727 2.146 9
0.781 -0.654 1.931 6
0.115 -0.639 1.915 10
-0.41 -0.299 1.829 9
-0.571 -0.184 1.502 8
-0.565 -0.148 0.861 9
-0.433 -0.113 0.211 8
-0.108 0.021 -0.207 8
-0.097 0.019 -0.186 9
0.386 0.297 -0.253 8
0.857 0.687 -0.103 9
1.17 1.064 -0.019 8
1.264 1.234 -0.157 8
1.174 1.123 0.019 7
0.963 0.87 0.644 10
0.867 0.783 0.58 8
0.515 0.593 0.633 9
-0.006 0.567 -0.058 8
-0.567 0.785 -0.637 9
-0.931 1.317 -0.731 8
-1.057 2.058 -0.623 8
-1.061 2.614 -0.597 9
-0.955 2.353 -0.538 8
-0.905 2.486 -0.513 9
-0.735 2.03 -0.496 8
-0.533 1.402 -0.443 7
-0.474 1.065 -0.178 10
-0.462 0.88 0.186 8
-0.416 0.792 0.564 9
-0.296 0.713 0.507 8
-0.009 0.526 0.877 8
0.407 0.403 1.123 9
0.856 0.293 1.247 8
1.259 0.186 1.32 9
1.53 0.042 1.367 8
1.377 0.038 1.23 8
1.428 -0.084 1.294 9
1.227 -0.145 1.359 6
0.915 -0.178 1.319 11
0.636 -0.187 1.13 8
0.454 -0.156 0.842 8
0.399 -0.111 0.563 9
0.359 -0.1 0.507 8
0.371 -0.026 0.317 8
0.389 0.006 0.213 9
0.419 -0.121 0.183 8
0.431 -0.267 0.23 9
0.362 -0.214 0.361 8
0.294 -0.1 0.474 8
0.264 -0.09 0.426 7
0.285 -0.047 0.413 10
0.356 -0.013 0.294 9
0.378 0.001 0.169 8
0.312 -0.074 -0.007 8
0.13 -0.159 -0.028 9
-0.12 -0.087 0.074 8
-0.108 -0.078 0.067 9
-0.212 0.043 -0.066 8
-0.175 0.14 -0.318 8
-0.175 0.289 -0.484 9
-0.212 0.422 -0.518 8
-0.191 0.38 -0.466 7
-0.189 0.434 -0.43 10
-0.072 0.438 -0.374 8
0.1 0.396 -0.276 9
0.173 0.339 -0.161 8
0.101 0.283 -0.097 8
-0.048 0.254 -0.152 9
-0.184 0.221 -0.255 8
-0.165 0.199 -0.229 9
-0.272 0.18 -0.234 8
-0.292 0.201 -0.34 8
-0.137 0.202 -0.561 9
0.078 0.186 -0.658 7
0.24 0.139 -0.602 10
0.356 0.058 -0.393 8
0.321 0.052 -0.354 8
0.377 -0.045 -0.095 9
0.335 -0.145 0.129 8
0.214 -0.176 0.301 9
0.025 -0.198 0.395 8
-0.269 -0.259 0.5 8
-0.547 -0.288 0.631 9
-0.492 -0.259 0.568 8
-0.596 -0.304 0.648 9
-0.395 -0.345 0.652 6
0.082 -0.37 0.685 10
0.573 -0.377 0.827 9
0.834 -0.315 0.947 8
0.751 -0.284 0.852 9
0.732 -0.235 0.859 8
0.491 -0.198 0.797 8
0.102 -0.148 0.718 9
-0.327 -0.125 0.661 8
-0.632 -0.093 0.586 8
-0.76 -0.06 0.34 9
-0.684 -0.054 0.306 8
-0.686 -0.065 0.016 7
-0.502 -0.034 -0.155 10
-0.14 0.062 -0.31 8
0.254 0.152 -0.457 9
0.47 0.228 -0.518 8
0.416 0.288 -0.454 9
0.375 0.259 -0.408 8
0.155 0.249 -0.246 8
-0.103 0.152 -0.058 9
-0.258 0.095 0.152 8
-0.337 0.053 0.177 9
-0.331 -0.035 0.002 8
-0.297 -0.032 0.002 7
-0.174 -0.041 -0.081 10
0.035 0.062 -0.162 8
0.339 0.196 -0.289 9
0.588 0.291 -0.4 8
0.682 0.33 -0.442 8
0.584 0.339 -0.374 9
0.526 0.305 -0.337 8
0.287 0.295 -0.222 9
0.054 0.26 -0.136 8
-0.115 0.205 -0.102 8
-0.209 0.14 -0.121 9
-0.196 0.093 -0.193 6
-0.099 0.06 -0.27 10
-0.089 0.054 -0.243 9
0.037 0.001 -0.257 8
0.17 -0.058 -0.185 9
0.301 -0.06 -0.091 8
0.393 0.009 -0.017 8
0.364 0.072 0.032 9
0.187 0.101 0.095 8
0.168 0.091 0.085 9
-0.101 0.076 0.206 8
-0.371 -0.039 0.361 8
-0.539 -0.187 0.419 7
-0.598 -0.289 0.261 10
-0.471 -0.319 0.177 9
-0.175 -0.286 0.154 8
-0.158 -0.257 0.138 8
0.09 -0.21 0.067 9
0.166 -0.083 0.057 8
0.12 0.03 0.048 9
0.003 0.025 0.064 8
-0.187 -0.004 0.117 8
-0.169 -0.004 0.194 9
-0.353 -0.052 0.175 8
-0.437 -0.098 0.236 7
-0.376 -0.096 0.241 10
-0.265 -0.073 0.174 8
-0.2 -0.121 0.175 9
-0.218 -0.186 0.268 8
-0.196 -0.168 0.242 8
-0.256 -0.179 0.243 9
-0.338 -0.156 0.174 8
-0.426 -0.107 0.112 9
-0.468 -0.04 0.043 8
-0.488 0.025 -0.008 8
-0.497 0.075 -0.033 9
-0.447 0.067 -0.03 7
# end
#Thu Feb 26 20:39:33 GMT+08:00 20151
