# Supplementary material for: Abnormal Gait Behavior Detection for Elderly Based on Enhanced Wigner-Ville Analysis and Cloud Incremental SVM Learning
Source: Hindawi journal article supplement (doi:10.1155/2016/5869238), 2016-01-01
Supplement: f1 [file 5869238.f1.zip › Supplementary Materials/Original Data/Leftward fall Ending recovery/original__123.txt]

# Accelerometer Values
# filename:  original__123.txt
# Saving start time: Thu Feb 26 20:39:34 GMT+08:00 2015

# sensor resolution: 0.0095825195m/s^2
#Sensorvendor: KIONIX, name: KX023 Accelerometer, type: 1,version : 1, range 39.240005

# X value, Y value, Z value, time diff in ms
-0.12 0.042 -0.111 10
0.025 0.046 -0.266 9
0.171 0.075 -0.335 8
0.271 0.057 -0.279 9
0.277 -0.018 -0.172 8
0.205 -0.125 -0.064 8
0.185 -0.112 -0.057 9
0.066 -0.192 0.056 8
-0.043 -0.253 0.164 8
-0.116 -0.324 0.233 9
-0.158 -0.384 0.246 8
-0.143 -0.346 0.221 7
-0.14 -0.337 0.16 10
-0.126 -0.303 0.144 8
-0.056 -0.209 0.038 9
0.038 -0.135 -0.077 8
0.103 -0.068 -0.161 9
0.111 -0.007 -0.204 8
0.061 0.036 -0.22 8
0.055 0.032 -0.198 9
0.006 0.047 -0.189 8
0.0 0.016 -0.139 9
0.016 -0.033 -0.053 8
0.03 -0.08 0.061 7
0.052 -0.102 0.177 10
0.086 -0.102 0.25 8
0.078 -0.091 0.225 9
0.121 -0.085 0.223 8
0.158 -0.083 0.151 8
0.182 -0.061 0.054 9
0.202 -0.022 -0.03 8
0.201 0.0 -0.083 8
0.146 0.005 -0.099 9
0.131 0.004 -0.089 8
0.032 0.004 -0.068 9
-0.052 0.013 -0.024 6
-0.085 0.015 0.009 10
-0.047 0.01 0.033 9
0.031 0.012 0.04 8
0.089 0.01 0.031 9
0.08 0.009 0.028 8
0.1 0.004 0.021 8
0.114 0.001 0.007 9
0.134 0.02 -0.025 8
0.167 0.066 -0.07 9
0.198 0.12 -0.099 8
0.178 0.108 -0.089 8
0.195 0.163 -0.098 7
0.202 0.192 -0.089 10
0.191 0.179 -0.059 9
0.141 0.139 0.003 8
0.085 0.081 0.077 8
0.079 0.033 0.129 9
0.071 0.029 0.116 8
0.111 -0.024 0.152 8
0.151 -0.098 0.167 9
0.15 -0.132 0.155 8
0.099 -0.111 0.115 9
0.024 -0.049 0.037 8
0.022 -0.044 0.033 7
-0.016 0.036 -0.058 10
0.002 0.089 -0.144 8
0.038 0.117 -0.205 9
0.052 0.134 -0.225 8
0.037 0.123 -0.198 8
0.019 0.093 -0.145 9
0.017 0.084 -0.083 8
0.012 0.031 -0.075 9
0.002 -0.029 -0.02 8
-0.021 -0.069 0.034 8
-0.051 -0.094 0.074 9
-0.063 -0.105 0.068 7
-0.031 -0.106 0.025 10
-0.028 -0.095 0.022 8
0.016 -0.084 -0.023 8
0.031 -0.063 -0.05 9
-0.003 -0.039 -0.049 8
-0.064 -0.029 -0.025 9
-0.12 -0.031 0.016 8
-0.155 -0.042 0.065 8
-0.14 -0.038 0.058 9
-0.158 -0.05 0.107 8
-0.157 -0.055 0.145 9
-0.143 -0.055 0.159 6
-0.094 -0.038 0.145 10
0.0 0.017 0.104 9
0.09 0.11 0.046 8
0.081 0.099 0.042 8
0.114 0.186 -0.014 9
0.081 0.235 -0.06 8
-0.019 0.251 -0.094 9
-0.163 0.228 -0.129 8
-0.332 0.154 -0.16 8
-0.299 0.139 -0.144 9
-0.48 0.053 -0.13 8
-0.598 -0.04 -0.083 7
-0.685 -0.128 -0.009 10
-0.846 -0.232 0.085 8
-1.056 -0.386 0.173 9
-1.18 -0.51 0.197 8
-1.062 -0.459 0.177 9
-0.969 -0.522 0.06 8
-0.663 -0.536 -0.173 8
-0.343 -0.502 -0.426 9
-0.141 -0.447 -0.616 8
0.226 -0.553 -0.58 9
0.281 -0.639 -0.441 8
0.253 -0.575 -0.397 7
-0.295 -0.255 0.0 10
-0.638 0.179 0.428 8
-0.671 0.253 0.259 8
-0.348 -0.125 -0.265 9
0.074 -0.452 -0.881 8
0.24 -0.397 -1.568 9
0.216 -0.357 -1.411 8
0.283 -0.216 -2.002 8
0.251 -0.12 -2.215 9
0.19 -0.046 -2.109 8
0.141 -0.008 -1.811 9
0.127 -0.007 -1.63 6
0.047 -0.041 -1.159 10
0.042 -0.037 -1.043 9
0.064 -0.042 -1.074 8
0.151 0.04 -1.106 9
0.247 0.295 -0.923 8
0.324 0.533 -0.653 8
0.373 0.587 -0.389 9
0.336 0.528 -0.35 8
0.325 0.382 -0.152 9
0.284 0.082 -0.1 8
0.295 -0.236 -0.143 8
0.427 -0.547 -0.244 7
0.645 -0.649 -0.439 10
0.882 -0.497 -0.558 9
0.794 -0.447 -0.502 8
1.028 -0.442 -0.599 8
1.202 -0.697 -0.728 9
1.333 -1.006 -0.711 8
1.391 -1.202 -0.602 8
1.385 -1.241 -0.481 9
1.386 -1.12 -0.355 8
1.248 -1.008 -0.32 9
1.291 -0.723 -0.112 8
1.233 -0.366 0.215 7
0.91 -0.081 0.427 10
0.488 -0.047 0.43 8
0.062 -0.22 0.443 9
-0.363 -0.471 0.497 8
-0.327 -0.424 0.447 8
-0.728 -0.667 0.334 9
-1.025 -0.771 0.074 8
-1.125 -0.705 -0.172 9
-0.982 -0.492 -0.358 8
-0.475 -0.296 -0.386 8
0.096 -0.14 -0.437 9
0.086 -0.126 -0.393 6
0.44 -0.138 -0.384 11
0.559 -0.299 -0.033 8
0.475 -0.424 0.462 8
0.265 -0.437 0.72 9
0.137 -0.241 0.476 8
0.123 -0.217 0.428 9
0.304 0.108 -0.236 8
0.813 0.542 -0.989 8
1.433 1.02 -1.639 9
2.004 1.462 -2.106 8
2.631 1.683 -2.057 8
2.368 1.515 -1.851 7
2.823 1.544 -1.387 10
2.913 1.495 -0.654 9
2.767 1.278 0.227 8
2.38 0.967 1.016 8
1.956 0.695 1.715 9
1.65 0.681 2.167 8
1.398 1.014 1.891 9
1.259 0.912 1.702 8
1.078 1.267 0.725 8
1.012 1.541 -0.213 9
1.225 1.801 -0.585 8
1.874 1.837 -0.143 7
2.734 1.601 1.178 10
3.431 1.162 2.785 8
3.088 1.046 2.506 9
3.478 0.544 3.821 8
3.559 0.186 4.282 8
3.488 0.074 3.637 9
3.352 0.133 2.273 8
3.233 0.245 0.659 9
2.909 0.221 0.593 8
2.876 0.369 -0.722 8
2.728 0.554 -1.353 9
2.508 0.416 -1.346 7
2.093 0.181 -0.871 10
1.458 0.187 -0.283 8
0.973 0.078 -0.141 8
0.876 0.071 -0.127 9
0.593 0.11 -0.459 8
0.661 0.65 -0.875 9
1.853 0.913 -1.274 8
3.837 0.634 -1.5 8
5.189 0.496 -1.308 9
5.45 0.484 -0.548 8
4.905 0.436 -0.493 9
4.373 0.163 0.927 6
3.293 -0.484 2.403 10
1.598 -1.153 3.03 9
-0.679 -1.583 2.52 8
-2.768 -1.647 1.096 9
-3.788 -1.556 -0.527 8
-3.409 -1.401 -0.474 8
-3.389 -1.686 -1.778 9
-2.803 -1.885 -2.006 8
-1.53 -1.75 -0.625 9
0.495 -1.71 1.396 8
2.11 -1.36 2.809 8
1.899 -1.224 2.528 7
2.656 -1.251 2.721 10
2.97 -2.154 1.945 8
2.586 -2.523 0.623 9
2.213 -2.454 -1.114 8
2.444 -2.616 -2.513 9
2.455 -2.548 -3.086 8
2.209 -2.293 -2.777 8
1.844 -1.758 -2.856 9
1.633 -1.099 -2.745 8
1.85 -0.647 -2.364 9
2.161 -0.151 -1.596 8
2.065 0.294 -0.94 7
1.493 0.368 -0.612 10
1.344 0.331 -0.551 8
0.549 0.106 -0.499 9
-0.335 -0.186 -0.552 8
-1.09 -0.412 -0.424 8
-1.684 -0.595 0.005 9
-2.271 -0.811 0.61 8
-2.763 -1.036 1.172 9
-2.486 -0.932 1.055 8
-2.91 -1.077 1.447 8
-3.353 -1.177 1.545 9
-3.773 -1.267 1.343 6
-4.252 -1.261 0.92 10
-4.485 -1.219 0.442 9
-4.182 -1.106 -0.158 8
-3.764 -0.995 -0.142 9
-2.972 -0.823 -0.981 8
-1.865 -0.599 -1.691 8
-0.98 -0.239 -2.052 9
-0.583 0.131 -2.107 8
-0.647 0.375 -1.892 9
-0.582 0.337 -1.702 8
-0.872 0.358 -1.353 8
-1.102 0.21 -0.981 7
-0.95 0.011 -0.729 10
-0.376 -0.111 -0.586 9
0.557 -0.086 -0.514 8
1.613 -0.032 -0.561 8
1.452 -0.029 -0.505 9
2.349 -0.027 -0.592 8
2.87 -0.023 -0.679 9
2.775 -0.054 -0.667 8
2.159 -0.096 -0.281 8
1.349 -0.058 0.348 9
0.667 -0.021 0.953 8
0.6 -0.019 0.858 7
0.218 -0.083 1.345 10
0.091 -0.115 1.576 8
0.223 -0.056 1.439 9
0.457 -0.002 1.018 8
0.492 0.125 0.564 8
0.341 0.298 0.165 9
0.307 0.268 0.148 8
0.122 0.332 -0.2 9
-0.19 0.307 -0.433 8
-0.628 0.3 -0.494 8
-1.054 0.312 -0.421 9
-0.948 0.281 -0.379 7
-1.399 0.145 -0.339 10
-1.837 -0.089 -0.361 8
-2.208 -0.238 -0.302 8
-2.413 -0.341 -0.19 9
-2.377 -0.438 -0.06 8
-2.112 -0.489 0.099 9
-1.897 -0.25 0.254 8
-1.707 -0.225 0.229 8
-1.631 0.04 0.506 9
-1.359 -0.237 0.766 8
-0.857 -0.628 0.761 9
-0.603 -0.581 0.596 6
-0.703 -0.398 0.347 10
-0.935 -0.398 0.069 9
-0.841 -0.358 0.062 8
-1.189 -0.414 -0.176 9
-1.424 -0.458 -0.274 8
-1.476 -0.515 -0.185 8
-1.391 -0.538 0.089 9
-1.158 -0.55 0.637 8
-0.885 -0.555 1.28 8
-0.796 -0.499 1.152 9
-0.484 -0.335 1.556 8
-0.358 -0.055 1.587 7
-0.701 0.071 1.29 10
-1.333 0.124 0.837 8
-2.033 0.166 0.49 9
-1.83 0.149 0.357 8
-2.322 0.182 0.321 9
-2.325 0.324 0.414 8
-1.9 0.515 0.609 8
-1.336 0.705 0.761 9
-0.908 0.892 0.728 8
-0.766 1.035 0.541 9
-0.69 0.931 0.487 8
-1.023 1.274 0.423 7
-1.334 1.371 0.506 10
-1.226 1.102 0.647 8
-1.19 1.001 0.832 9
-1.38 1.262 1.229 8
-1.42 1.745 1.44 8
-1.278 1.571 1.296 9
-0.955 2.068 1.42 8
-0.49 2.383 1.715 8
-0.282 2.271 1.666 9
-0.277 2.126 1.32 8
-0.122 2.117 0.988 9
-0.11 1.905 0.89 6
0.186 1.88 0.73 10
0.546 2.012 0.654 9
0.876 2.281 0.682 8
1.006 2.541 0.868 9
0.958 2.937 1.161 8
0.823 3.302 1.758 8
0.74 3.38 2.563 9
0.666 3.042 2.306 8
1.12 2.838 2.925 9
1.663 2.261 3.05 8
2.247 1.574 2.883 8
2.497 1.03 2.665 7
1.782 0.902 2.191 10
1.604 0.812 1.972 9
0.412 0.739 1.485 8
-0.58 0.268 1.199 8
-1.098 -0.285 1.28 9
-0.836 -0.52 1.901 8
-0.103 -0.349 2.441 9
0.372 -0.134 2.414 8
0.335 -0.121 2.172 8
0.353 0.027 1.732 9
0.005 0.102 0.971 8
-0.647 0.198 0.267 7
-1.242 0.361 -0.345 10
-1.692 0.353 -1.087 8
-1.865 0.201 -1.425 9
-1.679 0.181 -1.282 8
-1.539 -0.061 -0.861 8
-1.397 -0.477 -0.205 9
-1.453 -0.857 0.271 8
-1.673 -1.095 0.627 9
-1.819 -1.132 0.748 8
-1.734 -0.973 0.488 8
-1.561 -0.875 0.439 9
-1.29 -0.715 -0.157 7
-1.016 -0.558 -1.074 10
-0.873 -0.372 -2.149 8
-0.928 -0.247 -3.187 8
-1.245 -0.281 -4.037 9
-1.12 -0.252 -3.634 8
-1.681 -0.488 -4.198 9
-2.373 -0.816 -4.36 8
-2.861 -1.08 -4.043 8
-2.811 -1.331 -3.48 9
-2.308 -1.291 -2.522 8
-1.501 -0.658 -1.147 9
-1.351 -0.592 -1.032 6
-0.647 -0.012 -0.181 10
-0.145 -0.297 -0.076 9
-0.013 -0.978 -0.349 8
-0.222 -1.547 -0.921 8
-0.471 -2.062 -1.587 9
-0.956 -2.246 -2.054 8
-0.86 -2.021 -1.849 9
-1.622 -1.712 -1.927 8
-2.564 -1.065 -1.799 8
-3.206 -0.429 -1.774 9
-2.963 0.022 -1.733 8
-1.97 0.234 -1.641 7
-0.874 0.221 -1.621 10
-0.787 0.199 -1.459 8
-0.062 0.029 -1.553 9
0.236 -0.213 -1.502 8
0.148 -0.445 -1.271 9
-0.146 -0.645 -1.088 8
-0.421 -0.819 -0.97 8
-0.684 -0.903 -0.925 9
-0.615 -0.812 -0.833 8
-0.818 -0.808 -0.907 8
-0.779 -0.772 -1.03 9
-0.561 -0.713 -1.134 7
-0.291 -0.667 -1.106 10
0.009 -0.743 -0.895 8
0.008 -0.669 -0.805 8
0.221 -0.812 -0.608 9
0.258 -0.873 -0.403 8
0.122 -0.85 -0.138 9
-0.162 -0.769 0.052 8
-0.412 -0.676 0.134 8
-0.67 -0.617 0.085 9
-0.603 -0.555 0.076 8
-0.98 -0.487 0.001 9
-1.337 -0.332 0.046 6
-1.455 -0.19 0.127 10
-1.183 -0.131 0.151 9
-0.673 -0.017 0.131 8
-0.114 0.218 0.07 9
-0.103 0.196 0.063 8
0.401 0.43 0.034 8
0.762 0.54 0.004 9
0.853 0.551 -0.076 8
0.647 0.538 -0.055 9
0.217 0.537 0.034 8
-0.238 0.536 0.114 8
-0.214 0.483 0.103 7
-0.49 0.566 0.19 10
-0.587 0.746 0.2 9
-0.502 0.908 0.119 8
-0.179 1.011 0.0 8
0.174 1.143 -0.156 9
0.156 1.029 -0.14 8
0.343 1.179 -0.264 8
0.391 1.279 -0.237 9
0.261 1.344 -0.073 8
0.016 1.319 0.163 9
-0.215 1.205 0.483 8
-0.193 1.084 0.435 7
-0.378 0.959 0.746 10
-0.45 0.86 0.936 8
-0.319 0.823 0.996 9
-0.014 0.81 0.941 8
0.27 0.757 0.9 8
0.416 0.689 0.954 9
0.473 0.601 1.044 8
0.425 0.541 0.939 9
0.423 0.432 1.046 8
0.375 0.342 1.157 8
0.322 0.296 1.228 9
0.273 0.285 1.215 6
0.226 0.275 1.13 11
0.176 0.263 1.001 8
0.159 0.237 0.901 8
0.147 0.178 0.777 9
0.155 0.156 0.784 8
0.179 0.217 0.85 8
0.311 0.259 0.799 9
0.487 0.298 0.685 8
0.53 0.375 0.572 9
0.477 0.338 0.515 8
0.353 0.386 0.405 8
0.174 0.395 0.317 7
0.067 0.384 0.252 10
0.028 0.337 0.2 9
0.009 0.255 0.176 8
0.008 0.229 0.159 8
-0.02 0.116 0.186 9
-0.049 0.034 0.255 8
-0.066 -0.038 0.281 9
-0.081 -0.112 0.217 8
-0.088 -0.214 0.15 8
-0.086 -0.281 0.176 9
-0.078 -0.253 0.158 8
-0.039 -0.191 0.168 7
0.141 -0.09 0.072 10
0.415 -0.011 -0.043 8
0.651 0.071 -0.204 9
0.793 0.157 -0.48 8
0.797 0.296 -0.746 9
0.718 0.267 -0.672 8
0.612 0.413 -0.8 8
0.41 0.481 -0.793 9
0.2 0.43 -0.623 8
0.077 0.245 -0.341 8
-0.023 0.148 -0.017 9
-0.021 0.134 -0.015 7
-0.059 0.081 0.328 10
0.027 -0.035 0.569 8
0.129 -0.072 0.585 8
0.221 -0.007 0.435 9
0.317 0.077 0.172 8
0.378 0.147 -0.167 9
0.34 0.132 -0.15 8
0.357 0.134 -0.439 8
0.215 0.207 -0.577 9
-0.098 0.307 -0.401 8
-0.302 0.135 -0.088 9
-0.29 -0.091 0.088 6
-0.194 -0.184 0.204 10
-0.175 -0.166 0.184 9
-0.045 -0.194 0.204 8
0.174 -0.203 0.088 9
0.347 -0.186 -0.178 8
0.335 -0.056 -0.469 8
0.236 0.087 -0.613 9
0.128 0.119 -0.644 8
0.115 0.107 -0.58 9
-0.026 0.117 -0.56 8
-0.271 0.184 -0.424 8
-0.481 0.157 -0.093 7
-0.539 0.004 0.219 10
-0.529 -0.108 0.346 8
-0.399 -0.149 0.409 9
-0.359 -0.134 0.368 8
-0.045 -0.115 0.341 9
0.357 -0.041 0.187 8
0.651 0.011 0.025 8
0.706 0.002 -0.012 9
0.557 -0.05 0.053 8
0.502 -0.045 0.036 9
0.204 -0.04 0.032 8
-0.158 -0.046 0.088 7
-0.421 0.0 0.197 10
-0.552 0.034 0.135 8
-0.534 0.062 -0.01 9
-0.299 0.013 -0.189 8
-0.269 0.011 -0.17 8
0.034 -0.084 -0.181 9
0.186 -0.136 0.028 8
0.159 -0.155 0.272 9
0.029 -0.201 0.439 8
-0.175 -0.203 0.694 8
-0.366 -0.155 0.841 9
-0.329 -0.14 0.757 6
-0.41 -0.126 0.535 11
-0.399 -0.116 0.233 8
-0.303 -0.1 0.01 8
-0.139 -0.068 -0.127 9
0.021 -0.023 -0.18 8
0.115 -0.011 -0.124 8
0.103 -0.01 -0.112 9
0.06 -0.027 0.041 8
-0.115 -0.038 0.208 9
-0.271 -0.054 0.291 8
-0.398 -0.083 0.284 8
-0.358 -0.075 0.255 7
-0.598 -0.081 0.066 10
-0.538 -0.073 0.059 9
-0.465 -0.047 -0.186 8
-0.368 -0.004 -0.466 8
# end
#Thu Feb 26 20:39:39 GMT+08:00 2015.
