# Supplementary material for: Abnormal Gait Behavior Detection for Elderly Based on Enhanced Wigner-Ville Analysis and Cloud Incremental SVM Learning
Source: Hindawi journal article supplement (doi:10.1155/2016/5869238), 2016-01-01
Supplement: f1 [file 5869238.f1.zip › Supplementary Materials/Original Data/Leftward fall Ending recovery/original__124.txt]

# Accelerometer Values
# filename:  original__124.txt
# Saving start time: Thu Feb 26 20:39:41 GMT+08:00 2015

# sensor resolution: 0.0095825195m/s^2
#Sensorvendor: KIONIX, name: KX023 Accelerometer, type: 1,version : 1, range 39.240005

# X value, Y value, Z value, time diff in ms
-0.029 0.011 -0.136 9
-0.026 0.009 -0.123 6
0.195 0.035 -0.286 10
0.335 0.037 -0.35 9
0.332 0.011 -0.3 8
0.202 -0.023 -0.166 8
0.037 -0.048 -0.018 9
-0.094 -0.063 0.094 8
-0.157 -0.07 0.167 9
-0.142 -0.063 0.15 8
-0.12 -0.071 0.187 8
-0.048 -0.089 0.185 9
0.051 -0.089 0.161 8
0.174 -0.068 0.127 7
0.286 -0.053 0.06 10
0.336 -0.042 -0.004 8
0.302 -0.037 -0.004 9
0.28 -0.015 -0.042 8
0.211 0.0 -0.073 9
0.107 0.0 -0.073 8
-0.02 -0.005 -0.034 8
-0.11 -0.007 0.023 9
-0.134 -0.01 0.056 8
-0.12 -0.009 0.05 8
-0.093 -0.01 0.048 9
-0.029 -0.013 0.013 7
0.039 -0.01 -0.018 10
0.086 -0.003 -0.024 8
0.105 0.002 -0.025 8
0.103 0.001 -0.022 9
0.093 0.001 -0.02 8
0.073 -0.001 -0.01 9
0.041 -0.002 -0.003 8
0.021 -0.001 0.0 8
0.003 -0.002 -0.004 9
-0.028 0.0 -0.01 8
-0.025 0.0 -0.009 9
-0.043 -0.001 -0.01 6
-0.045 -0.003 -0.025 10
-0.024 -0.009 -0.057 9
0.048 -0.018 -0.093 8
0.133 -0.009 -0.109 9
0.187 0.006 -0.093 8
0.169 0.005 -0.084 8
0.177 0.012 -0.044 9
0.115 0.01 0.026 8
0.02 0.005 0.104 9
-0.07 -0.001 0.158 8
-0.134 -0.01 0.187 8
-0.121 -0.009 0.168 7
-0.136 -0.029 0.174 10
-0.106 -0.051 0.164 8
-0.074 -0.052 0.157 9
-0.056 -0.047 0.146 8
-0.027 -0.058 0.121 9
-0.001 -0.076 0.092 8
-0.01 -0.073 0.06 8
-0.009 -0.065 0.054 9
-0.044 -0.038 0.011 8
-0.076 -0.017 -0.06 9
-0.113 -0.001 -0.164 8
-0.156 0.006 -0.264 7
-0.228 0.013 -0.307 10
-0.342 0.018 -0.266 8
-0.308 0.016 -0.24 9
-0.42 0.013 -0.15 8
-0.467 0.002 -0.065 8
-0.466 -0.013 -0.016 9
-0.446 -0.036 -0.021 8
-0.417 -0.045 -0.067 9
-0.375 -0.041 -0.061 8
-0.351 -0.031 -0.129 8
-0.346 -0.025 -0.204 9
-0.362 -0.02 -0.256 6
-0.427 -0.008 -0.246 10
-0.547 0.001 -0.18 9
-0.689 -0.004 -0.076 8
-0.62 -0.004 -0.068 9
-0.762 -0.061 0.058 8
-0.856 -0.188 0.176 8
-0.883 -0.333 0.317 9
-0.85 -0.473 0.484 8
-0.744 -0.611 0.527 9
-0.464 -0.679 0.395 8
-0.417 -0.611 0.355 8
-0.031 -0.558 0.156 7
0.241 -0.374 -0.135 10
0.368 -0.103 -0.545 9
0.686 0.166 -0.87 8
0.821 0.409 -1.148 8
0.484 0.709 -1.351 9
0.435 0.638 -1.215 8
0.055 0.916 -0.879 9
-0.093 1.139 -0.17 8
-0.025 1.194 0.067 8
-0.098 0.675 -0.434 9
-0.092 -0.18 -1.03 8
-0.083 -0.162 -0.927 7
0.088 -0.721 -1.185 10
0.16 -0.883 -1.262 8
0.147 -0.814 -1.219 9
0.116 -0.673 -1.072 8
0.11 -0.565 -0.815 8
0.14 -0.488 -0.565 9
0.126 -0.439 -0.508 8
0.235 -0.449 -0.509 9
0.409 -0.514 -0.702 8
0.574 -0.541 -0.973 8
0.701 -0.53 -1.197 9
0.737 -0.556 -1.227 7
0.625 -0.693 -1.051 10
0.563 -0.624 -0.946 8
0.335 -0.848 -0.705 8
0.09 -1.05 -0.531 9
-0.148 -1.297 -0.417 8
-0.431 -1.612 -0.325 9
-0.638 -1.841 -0.33 8
-0.646 -1.924 -0.515 8
-0.581 -1.731 -0.463 9
-0.466 -1.621 -0.861 8
-0.313 -1.406 -1.42 9
-0.101 -1.318 -1.961 6
0.263 -1.254 -2.284 10
0.489 -1.077 -2.269 9
0.244 -0.958 -1.959 8
0.22 -0.862 -1.763 9
-0.31 -0.863 -1.308 8
-0.809 -0.774 -0.832 8
-1.414 -0.604 -0.555 9
-1.993 -0.462 -0.329 8
-2.28 -0.225 -0.163 8
-2.239 0.121 -0.085 9
-2.015 0.109 -0.076 8
-1.46 0.054 0.112 7
-0.595 -0.519 0.364 10
0.236 -0.949 0.608 8
1.003 -0.986 0.952 9
1.605 -0.763 1.418 8
1.445 -0.429 1.637 9
1.678 -0.386 1.473 8
1.562 -0.021 1.174 8
1.412 0.56 0.866 9
1.452 1.168 0.721 8
1.78 1.501 0.43 9
2.508 1.632 0.325 8
2.257 1.469 0.292 7
3.174 1.504 0.429 10
3.911 1.466 0.661 8
4.347 1.55 1.128 9
4.673 1.626 1.635 8
4.931 1.597 1.928 8
4.887 1.825 2.186 9
4.398 1.643 1.968 8
4.265 2.034 2.144 9
4.092 2.406 2.194 8
3.919 2.459 2.231 8
3.747 2.211 2.305 9
3.37 2.091 2.63 6
2.841 1.986 3.256 10
2.557 1.787 2.93 9
2.091 1.646 3.588 8
1.941 1.586 3.86 9
2.172 1.654 3.71 8
2.457 1.78 3.177 8
2.446 1.971 2.268 9
1.975 2.29 1.35 8
1.778 2.061 1.215 9
1.277 1.968 0.43 8
0.893 1.608 -0.241 8
0.68 1.532 -0.538 7
0.812 1.455 -0.464 10
1.128 1.3 -0.351 9
1.015 1.17 -0.457 8
1.322 1.053 -0.411 8
1.407 0.329 -0.579 9
1.233 -0.233 -0.533 8
0.713 -0.571 -0.321 9
0.309 -0.604 0.101 8
0.801 -0.797 0.639 8
0.72 -0.718 0.575 9
1.936 -0.967 1.223 8
3.073 -0.965 1.993 7
3.594 -0.893 2.62 10
3.357 -0.89 2.74 8
2.442 -1.028 2.0 9
0.893 -1.189 0.449 8
0.804 -1.07 0.404 8
-1.298 -0.914 -1.452 9
-2.797 -1.1 -3.124 8
-2.751 -1.738 -4.309 9
-1.691 -2.117 -4.458 8
-0.661 -2.307 -3.438 8
-0.372 -2.412 -1.716 9
-0.334 -2.171 -1.544 7
-0.599 -2.262 0.437 10
-1.026 -2.08 2.221 8
-1.366 -1.856 3.438 8
-1.295 -2.2 3.758 9
-0.864 -2.863 3.176 8
-0.995 -3.13 1.862 9
-0.896 -2.817 1.676 8
-1.384 -2.924 -0.107 8
-1.554 -3.042 -1.727 9
-1.612 -2.783 -2.791 8
-1.439 -2.049 -3.273 9
-1.295 -1.844 -2.946 6
0.042 -0.253 -3.732 10
0.038 -0.227 -3.358 9
0.683 0.663 -3.265 8
1.024 1.139 -2.81 8
1.295 0.713 -2.299 9
1.273 -0.232 -1.923 8
0.882 -1.211 -1.659 9
0.794 -1.09 -1.493 8
-0.288 -1.382 -1.282 8
-1.644 -1.243 -1.158 9
-2.222 -1.326 -1.104 8
-2.161 -1.446 -0.876 7
-1.912 -1.397 -0.61 10
-1.45 -1.267 -0.536 8
-1.305 -1.141 -0.483 9
-1.019 -0.676 -0.344 8
-0.707 -0.268 -0.25 9
-0.024 -0.277 -0.255 8
0.609 -0.278 0.054 8
0.814 -0.041 0.548 9
0.651 0.251 0.966 8
0.586 0.226 0.87 9
0.421 0.227 1.149 8
0.325 0.01 1.183 7
0.328 -0.236 1.004 10
0.469 -0.4 0.663 8
0.689 -0.532 0.381 8
0.871 -0.661 0.508 9
0.784 -0.595 0.457 8
0.841 -0.728 0.9 9
0.794 -0.949 1.385 8
0.633 -1.27 1.826 8
0.272 -1.517 2.022 9
0.103 -1.431 1.895 8
0.264 -0.979 1.577 9
0.238 -0.881 1.419 6
0.155 -0.308 1.072 10
-0.193 -0.003 0.787 9
-0.645 0.011 0.698 8
-1.132 0.039 0.912 9
-1.475 0.073 1.191 8
-1.327 0.066 1.072 8
-1.539 0.085 1.332 9
-1.609 0.158 1.397 8
-1.593 0.234 1.124 9
-1.461 0.201 0.71 8
-1.205 0.212 0.337 8
-1.085 0.191 0.303 7
-0.875 0.086 0.036 10
-0.708 0.272 0.125 9
-0.752 0.724 0.362 8
-0.889 0.612 0.33 8
-0.938 0.464 0.285 9
-0.968 0.546 0.194 8
-0.915 0.614 -0.058 9
-0.824 0.553 -0.052 8
-0.724 0.608 -0.387 8
-0.511 0.528 -0.674 9
-0.27 0.394 -0.656 8
-0.035 0.228 -0.339 7
0.102 0.068 0.115 10
-0.023 0.01 0.49 8
-0.021 0.009 0.441 9
-0.276 -0.001 0.594 8
-0.445 0.003 0.455 8
-0.497 0.085 0.005 9
-0.496 0.19 -0.573 8
-0.43 0.238 -1.033 9
-0.229 0.295 -1.198 8
-0.206 0.266 -1.078 8
0.127 0.209 -0.902 9
0.135 0.443 -0.386 6
-0.2 0.686 0.03 11
0.116 0.394 0.307 8
0.854 -0.139 0.73 8
0.769 -0.125 0.657 9
0.966 -0.486 0.591 8
0.735 -0.451 0.814 8
0.383 -0.297 0.813 9
0.081 -0.134 0.829 8
-0.213 0.208 0.819 9
-0.317 0.522 0.941 8
-0.286 0.47 0.847 8
-0.046 0.505 1.025 7
0.133 0.397 0.895 10
0.159 0.198 0.501 9
0.167 0.001 0.185 8
0.148 -0.074 0.232 8
0.043 -0.025 0.598 9
0.039 -0.022 0.538 8
0.024 -0.024 0.586 9
0.305 -0.13 0.131 8
0.73 -0.227 -0.405 8
1.018 -0.295 -0.889 9
1.009 -0.356 -1.294 8
0.908 -0.321 -1.165 7
0.555 -0.34 -1.498 10
0.001 -0.358 -1.846 8
-0.496 -0.346 -2.077 9
-0.814 -0.239 -1.993 8
-0.934 -0.145 -1.671 9
-0.933 -0.125 -1.399 8
-0.885 -0.125 -1.219 8
-0.796 -0.113 -1.097 9
-0.786 -0.108 -0.886 8
-0.784 -0.086 -0.651 8
-0.699 -0.049 -0.481 9
-0.576 -0.027 -0.446 7
-0.484 0.002 -0.479 10
-0.435 0.095 -0.468 8
-0.392 0.085 -0.421 8
-0.226 0.207 -0.432 9
-0.16 0.321 -0.577 8
-0.193 0.431 -0.799 9
-0.237 0.48 -0.938 8
-0.258 0.415 -0.967 8
-0.232 0.374 -0.87 9
-0.245 0.163 -0.846 8
-0.244 -0.061 -0.733 9
-0.189 -0.154 -0.551 6
0.018 -0.149 -0.305 10
0.362 -0.046 0.054 9
0.651 0.178 0.394 8
0.586 0.16 0.354 9
0.761 0.393 0.574 8
0.865 0.54 0.712 8
0.842 0.606 0.682 9
0.669 0.612 0.477 8
0.346 0.625 0.206 9
-0.081 0.709 -0.001 8
-0.073 0.638 -0.001 8
-0.519 0.79 -0.01 7
-0.919 1.021 0.242 10
-1.113 1.241 0.717 8
-1.037 1.387 1.257 9
-0.757 1.547 1.629 8
-0.289 1.656 1.725 9
-0.26 1.49 1.552 8
0.233 1.523 1.405 8
0.55 1.567 1.006 9
0.682 1.806 0.729 8
0.67 2.162 0.591 9
0.629 2.446 0.358 8
0.566 2.202 0.322 7
0.584 2.409 0.221 10
0.709 2.456 0.339 8
0.879 2.334 0.587 9
0.881 2.091 0.809 8
0.658 1.82 1.038 8
0.247 1.484 1.323 9
0.222 1.336 1.19 8
-0.252 1.02 1.409 9
-0.688 0.829 1.466 8
-1.07 0.57 1.487 8
-1.312 0.338 1.607 9
-1.323 0.458 1.778 6
-1.04 0.732 1.77 10
-0.936 0.659 1.593 9
-0.52 0.757 1.179 8
-0.159 0.603 0.501 9
0.06 0.255 -0.036 8
0.039 -0.096 -0.318 8
-0.237 -0.524 -0.453 9
-0.645 -0.926 -0.392 8
-0.581 -0.833 -0.353 9
-1.048 -0.86 0.158 8
-1.476 -0.826 0.887 8
-1.671 -0.833 1.248 7
-1.645 -0.596 1.018 10
-1.42 -0.299 0.441 9
-1.165 0.013 -0.169 8
-1.048 0.012 -0.152 8
-0.99 0.395 -0.782 9
-1.075 0.727 -1.299 8
-1.198 0.788 -1.459 9
-1.178 0.277 -1.522 8
-1.342 -0.134 -1.493 8
-1.207 -0.121 -1.344 9
-1.758 -0.058 -1.016 8
-2.296 0.004 -0.554 7
-2.654 0.016 -0.116 10
-2.762 0.036 0.233 8
-2.667 0.16 0.392 9
-2.472 0.445 0.294 8
-2.225 0.401 0.265 8
-1.754 0.641 0.044 9
-1.027 0.631 -0.398 8
-0.593 0.491 -1.008 9
-0.606 0.376 -1.392 8
-0.894 0.295 -1.484 8
-1.186 0.175 -1.411 9
-1.068 0.158 -1.27 7
-1.18 0.016 -1.162 10
-1.149 -0.091 -1.095 8
-1.016 -0.192 -1.106 8
-0.784 -0.285 -1.234 9
-0.446 -0.386 -1.419 8
-0.13 -0.458 -1.616 9
-0.117 -0.412 -1.454 8
0.009 -0.433 -1.748 8
-0.135 -0.507 -1.834 9
-0.173 -0.835 -1.582 8
-0.239 -1.115 -1.315 9
-0.215 -1.004 -1.183 6
-1.264 -0.754 -0.647 10
-1.137 -0.678 -0.582 9
-1.363 -0.507 -0.499 8
-1.343 -0.607 -0.712 9
-1.076 -0.898 -0.996 8
-0.783 -1.132 -1.093 8
-0.643 -1.2 -1.0 9
-0.579 -1.08 -0.9 8
-0.588 -1.151 -0.951 8
-0.725 -1.151 -1.081 9
-0.801 -1.088 -1.085 8
-0.715 -1.14 -1.06 7
-0.55 -1.185 -1.067 10
-0.285 -1.118 -1.082 8
-0.257 -1.006 -0.974 9
-0.053 -1.04 -1.14 8
-0.153 -1.16 -1.359 9
-0.371 -1.176 -1.27 8
-0.553 -1.075 -0.867 8
-0.775 -0.959 -0.528 9
-0.966 -0.849 -0.384 8
-0.869 -0.764 -0.345 9
-0.752 -0.721 -0.253 8
-0.459 -0.738 -0.196 7
-0.232 -0.707 -0.149 10
0.056 -0.646 -0.079 8
0.398 -0.562 -0.026 9
0.618 -0.425 0.014 8
0.557 -0.383 0.013 8
0.548 -0.216 0.098 9
0.312 -0.084 0.253 8
0.0 -0.002 0.391 8
-0.213 0.043 0.443 9
-0.308 0.065 0.393 8
-0.278 0.059 0.279 9
-0.3 0.053 0.251 6
-0.252 0.355 0.183 10
-0.145 0.5 0.176 9
-0.013 0.592 0.223 8
0.14 0.674 0.38 9
0.353 0.78 0.55 8
0.317 0.702 0.495 8
0.51 0.816 0.575 9
0.595 0.92 0.591 8
0.623 0.99 0.576 9
0.652 1.0 0.541 8
0.648 1.007 0.495 8
0.584 0.906 0.445 7
0.554 0.955 0.405 10
0.529 1.007 0.366 9
0.45 1.026 0.323 8
0.328 0.997 0.282 8
0.221 0.932 0.258 9
0.13 0.842 0.267 8
0.077 0.747 0.352 9
0.07 0.672 0.317 8
0.073 0.597 0.488 8
0.106 0.556 0.663 9
0.222 0.545 0.783 8
0.418 0.527 0.848 7
0.609 0.462 0.778 10
0.719 0.407 0.781 8
0.647 0.366 0.703 9
0.652 0.378 0.821 8
0.611 0.352 0.76 8
0.489 0.334 0.611 9
0.254 0.36 0.493 8
-0.003 0.352 0.402 9
-0.003 0.317 0.361 8
-0.182 0.312 0.297 8
-0.254 0.342 0.2 9
-0.181 0.388 0.051 7
0.034 0.426 -0.069 10
0.271 0.457 -0.056 8
0.406 0.461 0.096 8
0.365 0.414 0.087 9
0.346 0.364 0.3 8
0.196 0.288 0.592 9
-0.008 0.202 0.919 8
-0.126 0.129 1.094 8
-0.063 0.112 1.06 9
0.141 0.137 0.839 8
0.127 0.123 0.755 8
0.421 0.139 0.41 7
0.756 0.163 0.047 10
1.02 0.209 -0.292 9
1.088 0.244 -0.516 8
0.949 0.241 -0.552 8
0.699 0.179 -0.433 9
0.629 0.161 -0.39 8
0.342 0.046 -0.17 9
0.035 -0.129 0.087 8
-0.221 -0.295 0.329 8
-0.348 -0.368 0.466 9
-0.298 -0.352 0.406 8
-0.268 -0.317 0.365 7
-0.087 -0.237 0.152 10
0.111 -0.111 -0.145 8
0.254 0.026 -0.518 9
0.364 0.03 -0.819 8
0.292 0.113 -0.87 9
-0.057 0.368 -0.67 8
-0.051 0.331 -0.603 8
-0.414 0.364 -0.321 9
-0.605 0.214 -0.106 8
-0.638 0.126 0.03 8
-0.538 0.093 0.069 9
-0.337 0.085 0.011 7
-0.076 0.095 -0.127 10
-0.068 0.086 -0.115 8
0.224 0.093 -0.249 9
0.47 0.09 -0.227 8
0.556 0.086 -0.09 8
0.438 0.07 0.051 9
0.25 -0.001 0.202 8
0.072 -0.068 0.296 8
0.065 -0.061 0.266 9
-0.168 0.0 0.256 8
-0.373 0.071 0.189 9
-0.371 0.062 0.066 6
-0.16 0.044 -0.099 10
0.176 0.036 -0.311 9
0.159 0.033 -0.28 8
0.51 0.032 -0.44 9
0.658 0.032 -0.383 8
0.495 0.026 -0.239 8
0.209 0.024 -0.017 9
-0.055 0.022 0.364 8
-0.377 -0.006 0.631 9
-0.34 -0.006 0.568 8
-0.594 -0.069 0.589 8
-0.539 -0.126 0.446 7
-0.252 -0.124 0.225 10
0.097 -0.082 -0.011 9
0.425 -0.037 -0.173 8
0.539 -0.012 -0.138 8
0.485 -0.01 -0.124 9
0.318 -0.006 0.052 8
0.007 -0.032 0.303 8
-0.319 -0.122 0.477 9
-0.499 -0.171 0.55 8
-0.458 -0.163 0.683 9
-0.378 -0.163 0.674 8
-0.34 -0.147 0.607 7
-0.306 -0.131 0.367 10
-0.265 -0.098 0.109 8
-0.236 -0.041 -0.116 9
-0.215 0.018 -0.348 8
-0.2 0.055 -0.358 8
-0.18 0.049 -0.322 9
-0.305 0.021 -0.173 8
-0.589 0.014 -0.064 9
-0.724 0.038 -0.05 8
-0.626 0.025 -0.15 8
-0.403 0.044 -0.288 9
-0.362 0.04 -0.259 6
-0.077 0.073 -0.367 11
0.117 0.09 -0.302 8
0.186 0.094 -0.118 8
0.189 0.092 0.064 9
0.119 0.076 0.234 8
-0.079 0.037 0.382 8
-0.323 -0.046 0.55 9
-0.291 -0.042 0.495 8
-0.513 -0.071 0.456 9
-0.642 -0.026 0.112 8
-0.601 0.003 -0.3 8
-0.466 0.023 -0.695 7
-0.311 0.02 -0.926 10
-0.169 0.003 -0.914 9
-0.152 0.003 -0.822 8
-0.033 -0.003 -0.588 8
0.016 -0.003 -0.233 9
# end
#Thu Feb 26 20:39:46 GMT+08:00 2015-
