# Supplementary material for: Abnormal Gait Behavior Detection for Elderly Based on Enhanced Wigner-Ville Analysis and Cloud Incremental SVM Learning
Source: Hindawi journal article supplement (doi:10.1155/2016/5869238), 2016-01-01
Supplement: f1 [file 5869238.f1.zip › Supplementary Materials/Original Data/Leftward fall Ending recovery/original__125.txt]

# Accelerometer Values
# filename:  original__125.txt
# Saving start time: Thu Feb 26 20:39:47 GMT+08:00 2015

# sensor resolution: 0.0095825195m/s^2
#Sensorvendor: KIONIX, name: KX023 Accelerometer, type: 1,version : 1, range 39.240005

# X value, Y value, Z value, time diff in ms
-0.436 0.029 0.058 8
-0.477 0.018 0.022 8
-0.454 0.009 -0.025 9
-0.408 0.008 -0.022 7
-0.264 -0.009 -0.052 10
-0.017 -0.043 -0.069 8
0.176 -0.085 -0.068 8
0.23 -0.113 -0.037 9
0.18 -0.128 0.011 8
0.088 -0.143 0.077 9
-0.02 -0.161 0.145 8
-0.018 -0.145 0.13 8
-0.097 -0.18 0.17 9
-0.12 -0.226 0.172 8
-0.074 -0.246 0.133 8
0.017 -0.223 0.054 7
0.124 -0.155 -0.042 10
0.112 -0.139 -0.038 9
0.203 -0.041 -0.147 8
0.221 0.052 -0.248 8
0.17 0.113 -0.299 9
0.086 0.144 -0.284 8
-0.024 0.155 -0.216 9
-0.126 0.138 -0.126 8
-0.113 0.124 -0.114 8
-0.146 0.073 -0.041 9
-0.107 0.01 0.012 8
-0.023 -0.029 0.045 7
0.084 -0.035 0.065 10
0.203 -0.011 0.07 8
0.283 0.028 0.055 9
0.254 0.025 0.049 8
0.247 0.066 0.035 9
0.188 0.09 0.004 8
0.109 0.1 -0.042 8
0.018 0.098 -0.077 9
-0.04 0.075 -0.09 8
-0.047 0.025 -0.093 9
-0.042 0.022 -0.083 8
-0.035 -0.024 -0.069 7
-0.012 -0.041 -0.029 10
0.034 -0.027 0.013 8
0.091 -0.007 0.042 9
0.095 0.0 0.054 8
0.022 0.019 0.068 8
0.02 0.017 0.061 9
-0.082 0.045 0.079 8
-0.182 0.047 0.082 8
-0.257 0.038 0.074 9
-0.256 0.036 0.062 8
-0.207 0.038 0.05 9
-0.187 0.034 0.045 6
-0.185 0.018 0.049 10
-0.24 -0.033 0.074 9
-0.292 -0.105 0.121 8
-0.287 -0.174 0.157 9
-0.219 -0.212 0.142 8
-0.147 -0.194 0.123 8
-0.132 -0.174 0.11 9
-0.112 -0.135 0.093 8
-0.148 -0.103 0.101 9
-0.2 -0.09 0.187 8
-0.228 -0.104 0.319 8
-0.233 -0.127 0.463 7
-0.239 -0.152 0.572 10
-0.215 -0.137 0.515 9
-0.227 -0.148 0.585 8
-0.216 -0.12 0.521 8
-0.177 -0.048 0.221 9
-0.149 0.066 -0.186 8
0.021 0.122 -0.505 8
0.175 0.047 -0.783 9
0.157 0.042 -0.705 8
-0.144 0.27 -0.789 9
-0.62 0.841 -0.474 8
-0.858 1.121 -0.372 7
-0.673 0.805 -0.817 10
-0.231 0.215 -1.381 8
0.049 -0.073 -1.711 9
0.044 -0.066 -1.54 8
0.137 -0.009 -1.555 8
0.124 0.224 -1.233 9
0.049 0.473 -0.842 8
-0.122 0.556 -0.723 9
-0.363 0.438 -0.837 8
-0.327 0.394 -0.753 8
-0.541 0.174 -0.912 9
-0.638 0.073 -0.978 6
-0.538 0.107 -0.966 11
-0.274 0.092 -0.908 8
0.018 -0.004 -0.77 8
0.235 -0.116 -0.533 9
0.212 -0.105 -0.48 8
0.385 -0.209 -0.293 8
0.514 -0.358 -0.232 9
0.512 -0.617 -0.223 8
0.38 -0.919 -0.157 9
0.233 -1.207 -0.011 8
0.14 -1.473 0.067 8
0.126 -1.325 0.06 7
0.086 -1.538 -0.122 10
0.137 -1.558 -0.472 9
0.294 -1.415 -0.801 8
0.475 -1.252 -1.043 8
0.543 -1.113 -1.235 9
0.492 -1.005 -1.585 8
0.442 -0.904 -1.427 9
0.443 -0.821 -1.815 8
0.564 -0.742 -2.014 8
0.743 -0.554 -1.955 9
0.798 -0.219 -1.689 8
0.718 -0.197 -1.52 7
0.091 0.273 -1.21 10
0.081 0.245 -1.089 8
-0.608 0.381 -0.687 9
-1.27 0.551 -0.283 8
-1.352 0.349 -0.268 8
-0.836 -0.176 -0.454 9
-0.288 -0.424 -0.579 8
-0.259 -0.382 -0.521 9
0.118 -0.404 -0.56 8
0.245 -0.444 -0.658 8
0.221 -0.487 -0.846 9
0.244 -0.531 -1.112 7
0.321 -0.545 -1.378 10
0.458 -0.548 -1.54 8
0.412 -0.493 -1.386 8
0.473 -0.516 -1.523 9
0.518 -0.588 -1.488 8
0.7 -0.672 -1.104 9
0.83 -0.635 -0.528 8
0.856 -0.592 0.004 8
0.791 -0.662 0.477 9
0.712 -0.596 0.429 8
0.541 -0.673 0.886 9
0.372 -0.61 1.184 6
0.392 -0.33 1.276 10
0.883 0.06 1.189 9
1.967 0.504 0.939 8
3.306 0.996 0.667 9
2.976 0.896 0.6 8
3.955 1.451 0.493 8
4.241 1.846 0.548 9
3.957 1.952 0.655 8
3.35 2.03 0.782 9
2.72 1.806 0.81 8
2.448 1.626 0.729 8
1.918 1.229 0.656 7
1.567 1.259 1.007 10
1.859 1.646 1.244 8
2.909 2.077 1.372 9
4.116 2.42 1.787 8
4.994 2.678 2.65 9
4.495 2.41 2.385 8
4.902 2.489 3.351 8
4.643 2.411 3.971 9
3.861 2.304 3.969 8
2.989 2.14 3.393 9
2.332 1.958 2.489 8
2.099 1.763 2.24 7
1.724 1.6 1.433 10
1.644 1.45 0.959 8
1.802 1.255 0.8 9
1.829 1.008 0.874 8
1.448 0.908 1.011 8
0.767 1.233 1.145 9
0.701 1.29 1.158 8
0.631 1.161 1.042 9
1.574 0.534 0.84 8
2.506 0.2 0.858 8
2.932 0.21 1.48 9
2.975 -0.077 2.16 6
2.343 -0.748 2.073 10
0.604 -1.463 1.359 9
0.543 -1.316 1.223 8
-1.782 -1.992 0.463 9
-3.847 -2.713 -0.451 8
-4.848 -3.174 -1.526 8
-4.043 -3.384 -2.194 9
-2.022 -3.328 -1.904 8
-1.819 -2.814 -0.787 9
-1.637 -2.533 -0.708 8
2.108 -1.642 0.308 8
3.083 -1.365 1.151 7
3.729 -2.474 2.18 10
3.569 -4.395 3.035 9
2.118 -5.271 3.435 8
1.906 -4.744 3.091 8
0.144 -4.489 3.256 9
-0.775 -4.178 3.308 8
-0.903 -3.754 3.005 9
-0.829 -3.102 1.976 8
-0.976 -2.185 -0.005 8
-0.711 -1.476 -2.276 9
-0.64 -1.328 -2.048 8
-0.034 -0.812 -3.633 7
0.361 -0.295 -4.228 10
0.339 0.059 -4.117 8
-0.164 0.197 -3.766 9
-0.927 0.203 -3.493 8
-1.308 0.182 -3.137 8
-1.177 0.164 -2.824 9
-0.887 0.19 -2.196 8
-0.265 0.171 -1.392 9
0.444 0.043 -0.732 8
0.996 -0.22 -0.361 8
0.916 -0.51 -0.033 9
0.824 -0.459 -0.03 7
0.132 -0.717 0.315 10
-0.77 -0.994 0.553 8
-1.61 -1.198 0.707 8
-2.121 -1.259 0.806 9
-1.886 -1.247 1.017 8
-1.399 -1.183 1.258 9
-1.259 -1.064 1.356 8
-1.065 -0.958 1.221 8
-0.895 -0.819 1.27 9
-0.628 -0.767 1.272 8
-0.236 -0.714 1.06 9
-0.061 -0.646 0.616 6
-0.391 -0.525 0.168 10
-0.352 -0.473 0.151 9
-0.975 -0.305 -0.239 8
-1.494 -0.201 -0.56 8
-1.605 -0.211 -0.654 9
-1.274 -0.261 -0.475 8
-0.78 -0.336 -0.151 9
-0.402 -0.487 0.207 8
-0.361 -0.438 0.186 8
-0.212 -0.646 0.461 9
-0.273 -0.822 0.61 8
-0.426 -0.912 0.645 7
-0.646 -0.862 0.568 10
-0.916 -0.687 0.383 8
-1.106 -0.45 0.146 9
-0.995 -0.405 0.132 8
-0.963 -0.181 0.071 9
-0.765 0.001 0.258 8
-0.581 0.12 0.531 8
-0.47 0.146 0.72 9
-0.345 0.126 0.785 8
-0.13 0.134 0.692 8
-0.117 0.12 0.623 9
0.109 0.17 0.485 7
0.331 0.251 0.373 10
0.522 0.348 0.299 8
0.563 0.435 0.273 8
0.437 0.413 0.127 9
0.393 0.372 0.115 8
0.104 0.361 -0.199 9
-0.261 0.425 -0.409 8
-0.492 0.422 -0.332 8
-0.482 0.295 -0.252 9
-0.129 0.435 -0.213 8
0.355 0.712 -0.159 9
0.319 0.641 -0.143 6
0.588 0.655 -0.255 10
0.471 0.764 -0.327 9
0.447 0.388 -0.256 8
0.575 -0.126 -0.269 9
0.471 -0.14 -0.184 8
0.189 -0.134 0.058 8
0.17 -0.121 0.052 9
-0.048 -0.204 0.149 8
-0.023 -0.418 0.165 9
-0.104 -0.476 0.316 8
-0.351 -0.37 0.421 8
-0.55 -0.304 0.276 7
-0.645 -0.276 0.015 10
-0.581 -0.248 0.013 9
-0.615 -0.21 -0.255 8
-0.47 -0.147 -0.535 8
-0.066 -0.053 -0.916 9
0.299 0.031 -1.314 8
0.249 0.105 -1.513 9
-0.115 0.187 -1.514 8
-0.104 0.168 -1.362 8
-0.485 0.207 -1.23 9
-0.705 0.2 -0.883 8
-0.664 0.254 -0.293 7
-0.444 0.408 0.442 10
-0.219 0.78 1.06 8
-0.197 0.702 0.954 9
0.06 1.024 1.265 8
0.6 0.724 1.117 8
0.898 0.61 0.565 9
0.593 0.954 0.02 8
0.066 1.089 -0.471 9
-0.555 1.08 -0.929 8
-0.5 0.972 -0.836 8
-1.099 0.931 -1.131 9
-1.496 0.871 -1.28 6
-1.639 0.806 -1.374 11
-1.7 0.817 -1.43 8
-1.865 0.96 -1.292 8
-2.068 1.106 -0.853 9
-1.861 0.996 -0.767 8
-2.032 1.039 -0.127 8
-2.207 1.006 0.562 9
-2.378 0.882 1.169 8
-2.463 0.704 1.606 9
-2.42 0.651 1.879 8
-2.069 0.676 2.249 8
-1.862 0.609 2.024 7
-1.349 0.72 2.602 10
-0.839 1.013 3.025 9
-0.162 1.404 2.914 8
0.579 1.845 2.122 8
1.114 2.284 1.136 9
1.002 2.056 1.022 8
1.277 2.433 0.454 9
1.499 2.636 0.515 8
2.027 2.597 1.128 8
2.935 2.446 2.025 9
3.689 2.725 2.748 8
3.32 2.453 2.473 7
4.043 2.44 2.856 10
4.915 1.431 2.794 8
5.045 0.918 2.446 9
4.35 0.919 2.128 8
3.425 0.607 1.614 8
2.485 0.289 0.958 9
1.613 0.025 0.284 8
1.452 0.023 0.255 9
0.587 -0.335 -0.433 8
-0.223 -0.72 -0.885 8
-1.029 -0.972 -1.06 9
-1.88 -1.173 -1.197 7
-2.633 -1.369 -1.378 10
-3.319 -1.443 -1.589 8
-2.987 -1.298 -1.43 8
-3.687 -1.081 -1.619 9
-4.089 -0.655 -1.681 8
-3.894 -0.213 -1.67 9
-3.452 0.145 -1.739 8
-2.772 0.513 -1.76 8
-2.495 0.462 -1.584 9
-1.896 0.829 -1.748 8
-1.721 0.894 -2.261 9
-1.655 0.742 -2.543 6
-1.825 0.544 -2.33 10
-2.217 0.211 -1.869 9
-2.732 -0.169 -1.196 8
-2.459 -0.152 -1.076 9
-3.148 -0.444 -0.341 8
-3.626 -0.598 0.349 8
-3.719 -0.588 0.734 9
-3.499 -0.448 0.895 8
-2.954 -0.344 1.063 9
-2.377 -0.446 1.116 8
-2.139 -0.401 1.005 8
-1.769 -0.626 0.98 7
-1.509 -0.897 0.751 10
-1.333 -1.068 0.234 8
-1.371 -0.911 -0.241 9
-1.261 -0.948 -0.335 8
-0.874 -1.373 -0.205 9
-0.787 -1.236 -0.184 8
-0.841 -1.207 -0.161 8
-1.221 -0.607 -0.242 9
-1.383 -0.176 -0.07 8
-1.4 -0.08 0.013 9
-1.314 -0.112 -0.53 8
-1.182 -0.101 -0.477 7
-1.006 -0.198 -1.298 10
-0.879 -0.244 -1.938 8
-0.84 -0.234 -2.42 9
-0.821 -0.203 -2.676 8
-0.777 -0.158 -2.65 8
-0.517 -0.142 -2.46 9
-0.465 -0.128 -2.214 8
-0.289 0.04 -1.969 9
-0.228 0.291 -1.796 8
0.062 0.286 -1.671 8
0.376 0.157 -1.341 9
0.645 0.016 -0.887 6
0.832 -0.12 -0.674 10
0.748 -0.108 -0.607 9
0.655 -0.09 -0.796 8
0.434 -0.124 -1.524 9
0.176 -0.247 -2.15 8
-0.243 -0.195 -1.923 8
-0.755 0.044 -1.471 9
-1.347 0.311 -1.314 8
-1.212 0.28 -1.183 9
-1.525 0.39 -1.134 8
-1.141 0.363 -1.066 8
-0.447 0.316 -1.026 7
0.175 0.262 -0.977 10
0.774 0.147 -0.852 9
1.236 -0.006 -0.654 8
1.113 -0.005 -0.589 8
1.316 -0.134 -0.295 9
1.271 -0.214 0.044 8
0.952 -0.239 0.265 9
0.512 -0.199 0.374 8
0.089 -0.119 0.409 8
0.08 -0.107 0.368 9
-0.268 0.024 0.386 8
-0.388 0.148 0.459 7
-0.239 0.17 0.538 10
0.011 0.126 0.583 8
0.203 0.127 0.632 9
0.378 0.167 0.717 8
0.34 0.151 0.645 8
0.491 0.179 0.665 9
0.601 0.209 0.533 8
0.684 0.265 0.381 9
0.719 0.349 0.323 8
0.68 0.451 0.357 8
0.6 0.575 0.454 9
0.54 0.518 0.408 7
0.515 0.608 0.513 10
0.533 0.606 0.552 8
0.512 0.601 0.525 8
0.428 0.699 0.402 9
0.27 0.845 0.176 8
0.038 0.9 -0.03 9
0.034 0.81 -0.027 8
-0.048 0.586 -0.203 8
-0.124 0.492 -0.245 9
-0.432 0.844 -0.115 8
-0.731 1.218 0.006 9
-0.658 1.097 0.005 6
-0.696 1.264 0.154 10
-0.38 1.006 0.236 9
0.018 0.654 0.24 8
0.231 0.576 0.338 8
0.31 0.541 0.496 9
0.35 0.403 0.682 8
0.345 0.27 0.89 9
0.311 0.243 0.801 8
0.308 0.169 1.014 8
0.329 0.097 1.176 9
0.335 0.019 1.178 8
0.345 -0.13 1.244 7
0.278 -0.174 1.381 10
0.196 -0.063 1.252 8
0.176 -0.057 1.127 9
0.215 0.012 0.816 8
0.271 0.12 0.433 9
0.298 0.289 -0.016 8
0.328 0.447 -0.356 8
0.342 0.499 -0.344 9
0.269 0.435 -0.054 8
0.242 0.391 -0.049 9
0.063 0.257 0.234 8
-0.188 0.098 0.355 7
-0.437 0.009 0.322 10
-0.577 -0.011 0.12 8
-0.537 -0.039 -0.166 9
-0.483 -0.035 -0.15 8
-0.301 -0.07 -0.353 8
-0.076 -0.035 -0.473 9
0.122 0.0 -0.504 8
0.276 -0.024 -0.354 8
0.362 -0.036 -0.192 9
0.342 -0.017 -0.273 8
0.308 -0.015 -0.246 9
0.111 -0.03 -0.46 6
-0.228 -0.021 -0.647 10
-0.505 0.008 -0.788 9
-0.601 -0.012 -0.876 8
-0.612 0.112 -0.847 9
-0.58 0.288 -0.629 8
-0.522 0.259 -0.566 8
-0.335 0.162 -0.287 9
-0.05 -0.022 0.069 8
0.138 -0.087 0.522 9
0.197 -0.13 0.866 8
0.184 -0.178 0.999 8
0.166 -0.16 0.899 7
0.085 -0.182 0.872 10
-0.085 -0.189 0.795 9
-0.253 -0.187 0.72 8
-0.296 -0.195 0.639 8
-0.226 -0.243 0.509 9
-0.161 -0.228 0.296 8
-0.145 -0.205 0.266 9
-0.036 -0.153 0.185 8
0.157 -0.18 0.244 8
0.3 -0.2 0.269 9
0.392 -0.172 0.299 8
0.466 -0.133 0.353 7
0.458 -0.098 0.329 10
0.412 -0.088 0.296 8
0.296 -0.087 0.25 9
0.117 -0.095 0.319 8
-0.118 -0.106 0.416 8
-0.324 -0.14 0.472 9
-0.419 -0.188 0.513 8
-0.429 -0.245 0.513 9
-0.386 -0.22 0.461 8
-0.279 -0.257 0.411 8
-0.07 -0.256 0.328 9
0.135 -0.215 0.223 7
0.302 -0.138 0.087 10
0.388 -0.04 -0.05 8
0.368 0.053 -0.112 8
0.331 0.048 -0.1 9
0.167 0.12 -0.21 8
-0.122 0.178 -0.301 9
-0.342 0.207 -0.263 8
-0.418 0.207 -0.267 8
-0.379 0.191 -0.303 9
-0.341 0.171 -0.272 8
-0.154 0.159 -0.296 8
0.127 0.14 -0.309 7
0.349 0.112 -0.228 10
0.426 0.092 -0.076 9
0.339 0.081 0.067 8
0.132 0.059 0.231 8
0.119 0.053 0.208 9
-0.137 -0.047 0.445 8
-0.384 -0.102 0.641 9
-0.473 -0.106 0.519 8
-0.295 -0.143 0.126 8
0.022 -0.097 -0.342 9
0.297 -0.022 -0.67 8
0.267 -0.02 -0.603 7
0.398 0.008 -0.57 10
0.354 0.004 -0.229 8
0.202 0.004 0.271 9
0.02 -0.003 0.72 8
-0.165 -0.136 0.938 9
-0.332 -0.239 0.914 8
-0.299 -0.215 0.823 8
-0.41 -0.218 0.614 9
-0.472 -0.151 0.274 8
-0.485 -0.007 -0.14 8
-0.43 0.088 -0.546 9
-0.387 0.079 -0.491 7
# end
#Thu Feb 26 20:39:52 GMT+08:00 2015.
