# Supplementary material for: Abnormal Gait Behavior Detection for Elderly Based on Enhanced Wigner-Ville Analysis and Cloud Incremental SVM Learning
Source: Hindawi journal article supplement (doi:10.1155/2016/5869238), 2016-01-01
Supplement: f1 [file 5869238.f1.zip › Supplementary Materials/Original Data/Leftward fall Ending recovery/original__126.txt]

# Accelerometer Values
# filename:  original__126.txt
# Saving start time: Thu Feb 26 20:39:53 GMT+08:00 2015

# sensor resolution: 0.0095825195m/s^2
#Sensorvendor: KIONIX, name: KX023 Accelerometer, type: 1,version : 1, range 39.240005

# X value, Y value, Z value, time diff in ms
-0.134 -0.056 -0.11 9
-0.035 -0.051 -0.16 8
0.069 -0.052 -0.137 8
0.062 -0.047 -0.123 9
0.166 -0.065 -0.047 8
0.229 -0.088 0.068 9
0.224 -0.124 0.208 6
0.154 -0.183 0.369 10
0.058 -0.222 0.529 9
-0.022 -0.221 0.609 8
-0.02 -0.199 0.548 8
-0.056 -0.162 0.501 9
-0.008 -0.093 0.366 8
0.086 0.007 0.211 9
0.164 0.1 0.053 8
0.248 0.146 -0.095 8
0.223 0.131 -0.085 9
0.295 0.15 -0.177 8
0.273 0.172 -0.201 7
0.177 0.175 -0.205 10
0.074 0.15 -0.213 8
-0.021 0.11 -0.218 9
-0.11 0.073 -0.218 8
-0.099 0.066 -0.197 9
-0.152 0.051 -0.198 8
-0.166 0.061 -0.212 8
-0.16 0.06 -0.259 9
-0.151 0.045 -0.315 8
-0.141 0.033 -0.347 9
-0.115 0.032 -0.361 8
-0.103 0.029 -0.325 7
-0.022 0.027 -0.339 10
0.073 0.003 -0.336 8
0.136 -0.043 -0.299 9
0.203 -0.08 -0.233 8
0.285 -0.106 -0.116 8
0.336 -0.156 0.011 9
0.302 -0.14 0.01 8
0.297 -0.205 0.091 8
0.228 -0.247 0.146 9
0.123 -0.245 0.188 8
0.061 -0.224 0.194 9
0.055 -0.202 0.174 6
0.08 -0.212 0.095 10
0.072 -0.191 0.086 9
0.171 -0.172 0.07 8
0.189 -0.168 0.098 9
0.233 -0.199 0.143 8
0.311 -0.234 0.177 8
0.36 -0.226 0.208 9
0.324 -0.203 0.187 8
0.311 -0.148 0.207 9
0.251 -0.079 0.199 8
0.16 0.017 0.186 8
0.081 0.13 0.165 7
0.026 0.216 0.123 10
-0.026 0.279 0.081 9
-0.024 0.251 0.073 8
-0.076 0.288 0.065 8
-0.102 0.292 0.052 9
-0.081 0.262 0.012 8
-0.043 0.216 -0.022 8
-0.006 0.161 -0.046 9
0.01 0.123 -0.071 8
0.009 0.111 -0.064 9
-0.006 0.123 -0.078 8
-0.018 0.148 -0.088 7
0.0 0.152 -0.103 10
0.037 0.151 -0.114 8
0.084 0.163 -0.124 9
0.125 0.198 -0.147 8
0.113 0.178 -0.133 8
0.122 0.255 -0.182 9
0.09 0.379 -0.257 8
0.06 0.497 -0.359 9
0.061 0.58 -0.506 8
0.08 0.653 -0.687 8
0.072 0.587 -0.814 9
0.111 0.529 -0.733 6
0.155 0.609 -0.772 11
0.164 0.564 -0.705 8
0.143 0.457 -0.486 8
0.104 0.282 -0.207 9
0.05 0.072 -0.011 8
0.045 0.065 -0.01 9
-0.015 -0.085 0.078 8
-0.099 -0.078 0.089 8
-0.188 0.012 0.031 9
-0.227 0.072 -0.079 8
-0.206 0.086 -0.133 8
-0.185 0.078 -0.12 7
-0.148 0.015 -0.074 10
-0.135 -0.121 0.018 9
-0.19 -0.263 0.1 8
-0.367 -0.374 0.114 8
-0.617 -0.455 0.05 9
-0.811 -0.542 -0.136 8
-0.939 -0.617 -0.47 9
-0.845 -0.555 -0.423 8
-0.889 -0.619 -0.793 8
-0.692 -0.689 -1.071 9
-0.322 -0.749 -1.196 8
0.114 -0.786 -1.078 7
0.605 -0.808 -1.052 10
0.875 -0.817 -1.501 8
0.787 -0.736 -1.351 9
0.668 -0.726 -1.972 8
0.3 -0.713 -2.225 9
-0.115 -0.704 -1.995 8
-0.45 -0.695 -1.582 8
-0.701 -0.68 -1.224 9
-0.631 -0.612 -1.102 8
-0.9 -0.556 -0.992 8
-1.129 -0.451 -0.366 9
-1.204 -0.399 -0.09 7
-1.189 -0.515 -0.081 10
-1.165 -0.772 -0.3 8
-1.108 -1.084 -0.579 8
-0.997 -0.975 -0.521 9
-0.876 -1.274 -0.765 8
-0.687 -1.464 -0.957 9
-0.41 -1.524 -1.0 8
-0.094 -1.419 -1.056 8
0.187 -1.056 -1.125 9
0.421 -0.662 -1.097 8
0.379 -0.595 -0.987 9
0.488 -0.452 -1.112 6
0.556 -0.465 -1.212 10
0.684 -0.555 -1.148 9
0.819 -0.736 -1.097 8
1.042 -0.884 -0.964 9
1.377 -0.908 -0.733 8
1.239 -0.817 -0.66 8
1.667 -0.75 -0.35 9
2.06 -0.5 0.225 8
2.045 -0.185 0.907 9
1.403 0.087 1.467 8
0.428 0.357 1.988 8
0.385 0.321 1.789 7
-0.064 0.222 1.928 10
0.286 -0.16 1.721 9
0.849 -0.201 1.643 8
1.302 -0.003 1.504 8
1.657 0.186 1.246 9
1.821 0.411 1.036 8
1.639 0.37 0.933 8
1.515 0.659 0.667 9
1.361 1.012 0.534 8
1.331 1.311 0.859 9
1.444 1.556 1.402 8
1.747 1.746 1.717 7
2.227 1.926 1.673 10
2.005 1.733 1.506 8
2.48 1.929 1.126 9
2.692 1.987 0.569 8
2.779 1.866 0.3 8
2.791 1.704 0.424 9
2.727 1.706 0.804 8
2.637 1.725 1.366 9
2.373 1.553 1.229 8
2.284 1.4 1.868 8
2.212 1.156 2.43 9
2.329 1.062 2.806 6
2.726 1.072 2.859 11
3.197 0.965 2.77 8
3.475 0.757 2.762 8
3.128 0.681 2.486 9
2.998 0.477 2.591 8
2.43 0.253 2.676 8
1.775 0.018 2.593 9
1.246 -0.074 2.323 8
0.904 0.003 1.891 9
0.814 0.002 1.702 8
0.721 0.178 1.532 8
0.911 0.446 0.719 7
1.414 0.466 0.214 10
1.658 0.473 -0.249 9
1.278 0.892 -0.651 8
0.893 0.952 -1.224 8
0.804 0.857 -1.101 9
0.39 0.575 -1.773 8
-0.243 0.496 -2.389 9
-0.649 0.488 -2.966 8
-0.741 0.454 -3.471 8
-0.519 0.276 -3.849 9
-0.159 -0.09 -3.8 8
-0.143 -0.081 -3.42 7
-0.106 -0.436 -2.841 10
-0.464 -0.575 -1.879 8
-0.686 -0.622 -0.696 9
-0.23 -0.949 0.358 8
0.766 -1.317 1.077 9
1.837 -1.196 1.565 8
1.653 -1.076 1.409 8
2.389 -0.754 1.49 9
2.448 -0.686 0.865 8
1.668 -0.796 0.025 8
0.498 -1.182 -0.388 9
0.449 -1.064 -0.349 7
-1.767 -1.423 -0.748 10
-1.591 -1.281 -0.674 8
-1.339 -1.278 -0.667 8
-0.244 -1.069 -0.534 9
1.018 -0.702 -0.495 8
1.904 -0.207 -0.585 9
2.471 0.2 -0.788 8
2.224 0.18 -0.71 8
2.675 0.346 -0.922 9
2.949 0.305 -1.082 8
3.016 0.006 -1.206 9
2.78 0.04 -1.299 6
2.291 0.408 -1.262 10
1.997 -0.291 -1.252 9
1.797 -0.262 -1.127 8
1.859 -2.074 -1.201 9
1.863 -3.949 -1.05 8
1.529 -5.101 -0.79 8
0.477 -4.298 -0.308 9
-0.552 -2.815 0.245 8
-0.888 -2.129 0.348 8
-0.799 -1.916 0.313 9
-0.895 -1.528 0.012 8
-0.881 -1.381 -0.423 7
-0.91 -1.353 -0.901 10
-0.944 -1.337 -1.264 8
-1.214 -1.337 -1.51 9
-1.804 -1.389 -1.786 8
-1.624 -1.25 -1.608 9
-2.246 -1.318 -1.644 8
-2.95 -1.239 -1.265 8
-3.619 -0.949 -0.825 9
-3.884 -0.617 -0.511 8
-3.424 -0.223 -0.148 9
-3.081 -0.2 -0.133 8
-1.94 0.331 0.297 7
-1.168 1.181 0.833 10
-1.068 1.356 1.204 8
-1.664 0.95 1.255 9
-3.224 1.155 1.467 8
-4.533 1.587 1.683 8
-4.08 1.428 1.515 9
-4.553 1.706 1.11 8
-4.267 1.76 0.393 9
-3.204 1.761 -0.065 8
-1.952 1.908 -0.24 8
-1.243 2.18 -0.126 9
-1.118 1.962 -0.113 6
-0.819 1.748 0.131 10
-0.938 1.458 0.485 9
-1.466 1.45 0.933 8
-1.874 1.319 1.224 9
-2.049 1.221 1.269 8
-1.914 1.074 1.183 8
-1.433 0.955 1.05 9
-1.29 0.859 0.945 8
-0.619 0.868 0.694 9
-0.093 0.915 0.292 8
0.422 0.906 -0.031 8
0.573 0.859 -0.341 7
0.158 0.778 -0.76 10
0.142 0.7 -0.684 9
-0.391 0.486 -1.076 8
-1.033 0.272 -1.225 8
-1.581 0.176 -1.024 9
-1.863 0.115 -0.622 8
-1.892 0.129 -0.048 9
-1.759 0.245 0.664 8
-1.583 0.22 0.597 8
-1.104 0.349 1.267 9
-0.182 0.392 1.51 8
0.715 0.444 1.255 7
1.236 0.461 0.845 10
1.396 0.368 0.463 8
1.21 0.276 0.373 9
1.089 0.248 0.335 8
0.698 0.113 0.573 8
0.205 -0.04 0.847 9
-0.313 -0.274 1.054 8
-0.627 -0.359 1.225 9
-0.507 -0.214 1.369 8
0.073 -0.156 1.248 8
0.065 -0.14 1.123 9
0.692 -0.084 0.795 7
1.108 -0.059 0.536 10
1.346 -0.088 0.455 8
1.36 -0.14 0.599 8
1.17 -0.375 0.772 9
1.053 -0.337 0.695 8
0.842 -0.287 0.912 9
0.737 -0.002 1.003 8
0.763 0.072 0.675 8
0.933 -0.024 0.208 9
1.105 -0.249 -0.175 8
1.06 -0.395 -0.461 9
0.954 -0.356 -0.415 6
0.623 -0.366 -0.614 10
0.157 -0.305 -0.647 9
-0.296 -0.291 -0.474 8
-0.509 -0.285 -0.285 8
-0.478 -0.165 -0.235 9
-0.526 0.059 -0.273 8
-0.474 0.053 -0.246 9
-0.576 0.285 -0.33 8
-0.61 0.434 -0.392 8
-0.612 0.422 -0.259 9
-0.602 0.207 0.19 8
-0.636 -0.196 0.759 7
-0.991 -0.712 0.993 10
-0.892 -0.641 0.894 8
-1.034 -0.294 1.258 9
-0.467 0.682 1.837 8
0.261 0.74 1.838 9
0.725 0.082 1.202 8
0.83 -0.434 0.466 8
0.74 -0.538 0.169 9
0.666 -0.484 0.152 8
0.474 -0.43 0.186 9
0.117 -0.454 0.195 8
-0.288 -0.605 0.064 7
-0.628 -0.779 -0.145 10
-0.819 -0.924 -0.227 8
-0.796 -0.947 -0.167 9
-0.717 -0.852 -0.15 8
-0.569 -0.65 -0.191 8
-0.383 -0.432 -0.382 9
-0.292 -0.417 -0.523 8
-0.321 -0.515 -0.346 8
-0.36 -0.569 -0.084 9
-0.324 -0.512 -0.076 8
-0.222 -0.495 -0.195 9
0.097 -0.505 -0.684 6
0.493 -0.519 -1.168 10
0.8 -0.448 -1.269 9
0.915 -0.36 -1.109 8
0.853 -0.331 -1.097 9
0.768 -0.298 -0.987 8
0.672 -0.368 -1.102 8
0.587 -0.48 -1.144 9
0.553 -0.615 -1.229 8
0.662 -0.776 -1.401 9
0.912 -0.897 -1.464 8
1.118 -0.963 -1.295 8
1.006 -0.866 -1.166 7
1.071 -0.893 -0.879 10
1.033 -0.905 -0.597 9
0.918 -0.905 -0.426 8
0.67 -0.836 -0.357 8
0.344 -0.719 -0.336 9
0.147 -0.643 -0.37 8
0.133 -0.578 -0.333 8
0.103 -0.607 -0.382 9
0.106 -0.797 -0.325 8
0.106 -1.043 -0.169 9
0.147 -1.156 0.017 8
0.132 -1.04 0.016 7
0.134 -0.959 0.432 10
0.121 -0.863 0.389 8
0.046 -0.712 0.476 9
0.034 -0.65 0.529 8
0.189 -0.651 0.573 8
0.372 -0.624 0.607 9
0.416 -0.589 0.589 8
0.374 -0.53 0.53 9
0.249 -0.438 0.491 8
-0.024 -0.049 0.554 8
-0.294 0.512 0.653 9
-0.408 0.919 0.627 6
-0.433 1.207 0.608 11
-0.435 1.448 0.701 8
-0.392 1.303 0.631 8
-0.38 1.554 0.79 9
-0.374 1.747 0.967 8
-0.353 1.855 1.106 9
-0.304 1.924 1.136 8
-0.21 1.953 1.08 8
0.017 1.981 0.987 9
0.015 1.783 0.888 8
0.345 1.814 0.801 8
0.609 1.759 0.787 7
0.738 1.639 0.986 10
0.745 1.507 1.313 9
0.662 1.413 1.658 8
0.579 1.461 2.005 8
0.521 1.315 1.805 9
0.587 1.404 2.07 8
0.762 1.371 2.097 9
0.748 1.235 1.965 8
0.427 0.945 1.943 8
-0.186 0.511 2.13 9
-1.057 0.065 2.505 8
-0.951 0.059 2.255 7
-1.848 -0.256 2.646 10
-2.468 -0.423 2.772 8
-2.523 -0.489 2.594 9
-1.947 -0.512 2.205 8
-1.06 -0.545 1.594 9
-0.954 -0.49 1.435 8
-0.23 -0.546 0.652 8
0.103 -0.586 -0.256 9
0.017 -0.602 -1.068 8
-0.447 -0.6 -1.514 8
-1.015 -0.552 -1.663 9
-0.913 -0.496 -1.497 7
-1.229 -0.4 -1.587 10
-1.159 -0.324 -1.749 8
-0.854 -0.25 -1.922 8
-0.501 -0.134 -2.001 9
-0.219 -0.023 -1.91 8
-0.062 0.14 -1.589 9
-0.039 0.34 -1.022 8
-0.035 0.306 -0.92 8
-0.169 0.432 -0.21 9
-0.425 0.506 0.386 8
-0.589 0.571 0.686 9
-0.485 0.608 0.715 6
-0.379 0.701 0.403 10
-0.226 0.759 0.01 9
-0.203 0.683 0.009 8
0.028 0.643 -0.164 9
-0.08 0.683 -0.027 8
-0.485 0.885 0.539 8
-0.818 1.133 1.368 9
-0.891 1.292 2.043 8
-0.802 1.163 2.316 9
-0.664 1.047 2.084 8
-0.354 1.264 1.925 8
0.067 1.164 1.376 7
0.484 1.008 0.631 10
0.646 0.623 -0.171 8
0.281 0.137 -0.77 9
0.253 0.123 -0.693 8
-0.592 -0.006 -0.825 9
-1.429 -0.001 -0.571 8
-1.9 -0.152 -0.374 8
-2.013 -0.342 -0.376 9
-1.892 -0.636 -0.58 8
-1.757 -0.93 -1.051 9
-1.581 -0.837 -0.946 8
-1.498 -0.983 -1.429 7
-1.376 -1.03 -1.795 10
-1.028 -1.092 -2.079 8
-0.666 -1.275 -2.314 9
-0.691 -1.28 -2.477 8
-0.939 -0.993 -2.33 8
-0.845 -0.894 -2.097 9
-1.107 -0.654 -1.838 8
-1.338 -0.541 -1.86 9
-1.496 -0.54 -2.048 8
-1.656 -0.689 -2.155 8
-1.887 -0.946 -2.215 9
-1.698 -0.852 -1.993 6
-1.871 -1.082 -1.979 11
-1.941 -1.155 -1.787 8
-1.925 -1.099 -1.441 8
-1.798 -1.024 -1.026 9
-1.652 -0.901 -0.671 8
-1.481 -0.784 -0.475 8
-1.333 -0.706 -0.427 9
-1.066 -0.777 -0.385 8
-0.749 -0.881 -0.85 9
-0.38 -0.895 -1.247 8
-0.028 -0.879 -1.589 8
0.162 -0.847 -1.945 7
0.192 -0.809 -2.174 10
0.173 -0.728 -1.956 9
0.04 -0.604 -1.914 8
-0.161 -0.418 -1.66 8
-0.249 -0.276 -1.372 9
-0.094 -0.237 -1.081 8
0.077 -0.235 -0.913 9
0.15 -0.09 -0.711 8
0.135 -0.081 -0.64 8
0.221 0.083 -0.475 9
0.263 0.121 -0.596 8
0.243 0.086 -0.703 7
0.146 0.046 -0.65 10
-0.045 -0.001 -0.557 8
-0.245 -0.048 -0.44 9
-0.22 -0.043 -0.396 8
-0.301 -0.087 -0.212 8
-0.203 -0.153 -0.01 9
-0.118 -0.15 0.154 8
-0.19 -0.048 0.274 9
-0.317 0.08 0.376 8
-0.404 0.199 0.465 8
-0.364 0.179 0.418 9
-0.263 0.285 0.428 7
0.031 0.406 0.331 10
0.345 0.537 0.215 8
0.517 0.581 0.256 8
0.463 0.522 0.528 9
0.417 0.47 0.475 8
0.164 0.361 0.756 9
-0.055 0.281 0.916 8
-0.191 0.216 1.033 8
-0.397 0.257 0.997 9
-0.575 0.466 0.905 8
-0.658 0.668 0.882 9
-0.592 0.601 0.794 6
-0.599 0.791 0.668 10
-0.369 0.901 0.486 9
0.04 0.846 0.395 8
0.266 0.848 0.453 9
0.205 0.906 0.66 8
-0.02 0.874 0.868 8
-0.018 0.786 0.781 9
-0.255 0.803 0.924 8
-0.384 0.848 0.977 8
-0.409 0.837 0.895 9
-0.301 0.81 0.654 8
0.033 0.785 0.278 7
0.452 0.765 -0.033 10
0.407 0.689 -0.03 8
0.696 0.66 -0.116 9
0.745 0.606 -0.047 8
0.581 0.549 0.144 9
0.266 0.5 0.384 8
-0.068 0.444 0.539 8
-0.215 0.356 0.612 9
-0.193 0.32 0.551 8
-0.184 0.269 0.493 9
-0.089 0.287 0.31 8
0.139 0.294 0.143 7
0.53 0.275 -0.096 10
0.917 0.25 -0.369 8
0.825 0.225 -0.332 9
1.045 0.194 -0.46 8
1.058 0.154 -0.417 8
0.815 0.105 -0.24 9
0.406 -0.011 0.026 8
0.022 -0.132 0.324 9
-0.258 -0.188 0.525 8
-0.233 -0.169 0.473 8
-0.313 -0.225 0.554 9
-0.157 -0.236 0.488 6
0.178 -0.182 0.226 10
0.573 -0.106 -0.132 9
0.865 -0.044 -0.406 8
1.046 0.02 -0.349 9
0.941 0.018 -0.314 8
0.896 0.104 0.04 8
0.5 0.09 0.342 9
0.014 -0.031 0.542 8
-0.278 -0.152 0.685 9
-0.388 -0.22 0.68 8
-0.365 -0.256 0.556 8
-0.329 -0.23 0.5 7
-0.174 -0.258 0.358 10
0.019 -0.236 0.279 9
0.165 -0.195 0.29 8
0.233 -0.138 0.334 8
0.252 -0.062 0.433 9
0.227 -0.055 0.39 8
0.196 -0.022 0.568 9
0.088 -0.002 0.755 8
-0.051 -0.012 0.885 8
-0.181 -0.061 1.027 9
-0.285 -0.11 1.188 8
-0.257 -0.099 1.069 7
-0.328 -0.146 1.131 10
-0.346 -0.156 0.999 8
-0.336 -0.101 0.728 9
-0.298 -0.016 0.407 8
# end
#Thu Feb 26 20:39:58 GMT+08:00 20150
