# Supplementary material for: Abnormal Gait Behavior Detection for Elderly Based on Enhanced Wigner-Ville Analysis and Cloud Incremental SVM Learning
Source: Hindawi journal article supplement (doi:10.1155/2016/5869238), 2016-01-01
Supplement: f1 [file 5869238.f1.zip › Supplementary Materials/Original Data/Leftward fall Ending recovery/original__128.txt]

# Accelerometer Values
# filename:  original__128.txt
# Saving start time: Thu Feb 26 20:40:07 GMT+08:00 2015

# sensor resolution: 0.0095825195m/s^2
#Sensorvendor: KIONIX, name: KX023 Accelerometer, type: 1,version : 1, range 39.240005

# X value, Y value, Z value, time diff in ms
-0.157 0.242 -0.559 8
-0.027 0.245 -0.56 8
0.058 0.211 -0.513 9
0.052 0.19 -0.462 6
0.075 0.124 -0.417 11
0.038 0.066 -0.356 8
-0.019 0.025 -0.281 8
-0.043 -0.009 -0.232 9
-0.026 -0.013 -0.215 8
-0.024 -0.012 -0.193 9
0.022 0.003 -0.195 8
0.085 0.037 -0.205 8
0.133 0.089 -0.223 9
0.142 0.124 -0.249 8
0.125 0.152 -0.258 8
0.112 0.137 -0.232 7
0.098 0.162 -0.236 10
0.085 0.148 -0.235 9
0.06 0.088 -0.209 8
0.04 0.02 -0.163 8
0.044 -0.016 -0.116 9
0.059 -0.038 -0.076 8
0.064 -0.058 -0.051 9
0.058 -0.052 -0.046 8
0.049 -0.058 -0.029 8
0.01 -0.07 -0.016 9
-0.061 -0.071 -0.005 8
-0.105 -0.047 0.016 7
-0.065 -0.033 0.026 10
0.002 -0.058 0.011 8
0.002 -0.052 0.01 9
0.035 -0.085 0.002 8
0.025 -0.103 0.013 9
0.016 -0.119 0.035 8
0.06 -0.122 0.054 8
0.114 -0.146 0.068 9
0.103 -0.132 0.061 8
0.091 -0.154 0.095 8
0.022 -0.154 0.158 9
-0.039 -0.139 0.205 7
-0.088 -0.107 0.178 10
-0.132 -0.076 0.094 8
-0.164 -0.059 -0.009 8
-0.147 -0.053 -0.008 9
-0.198 -0.059 -0.138 8
-0.251 -0.064 -0.306 9
-0.259 -0.072 -0.513 8
-0.208 -0.109 -0.742 8
-0.096 -0.151 -0.896 9
0.023 -0.166 -0.919 8
0.021 -0.149 -0.827 9
0.1 -0.189 -0.763 6
0.118 -0.242 -0.616 10
0.107 -0.278 -0.454 9
0.105 -0.309 -0.417 8
0.082 -0.324 -0.494 9
0.038 -0.329 -0.654 8
0.034 -0.296 -0.588 8
0.015 -0.326 -0.886 9
0.039 -0.399 -1.2 8
0.097 -0.488 -1.456 9
0.198 -0.6 -1.666 8
0.266 -0.722 -1.854 8
0.239 -0.65 -1.668 7
0.223 -0.73 -1.773 10
0.148 -0.759 -1.687 8
0.013 -0.771 -1.551 9
-0.159 -0.817 -1.444 8
-0.3 -0.892 -1.363 9
-0.348 -0.951 -1.307 8
-0.313 -0.856 -1.176 8
-0.329 -0.884 -1.183 9
-0.412 -0.908 -1.295 8
-0.504 -0.878 -1.383 9
-0.476 -0.759 -1.259 8
-0.348 -0.661 -1.012 7
-0.171 -0.658 -0.829 10
-0.154 -0.592 -0.746 8
0.056 -0.669 -0.68 9
0.219 -0.734 -0.665 8
0.337 -0.664 -0.587 8
0.378 -0.597 -0.517 9
0.2 -0.648 -0.581 8
-0.045 -0.75 -0.667 9
-0.041 -0.675 -0.6 8
-0.2 -0.779 -0.625 8
-0.372 -0.796 -0.604 9
-0.561 -0.753 -0.565 6
-0.666 -0.65 -0.538 11
-0.661 -0.476 -0.478 8
-0.595 -0.429 -0.245 8
-0.502 -0.386 -0.22 9
-0.368 -0.064 0.301 8
-0.349 0.118 0.754 8
-0.41 0.22 0.926 9
-0.317 0.347 1.024 8
0.033 0.636 1.03 9
0.03 0.572 0.927 8
0.608 0.956 0.84 8
1.273 1.269 0.846 7
1.822 1.443 1.174 10
1.952 1.451 1.715 9
1.701 1.33 2.367 8
1.37 1.138 3.169 8
1.233 1.024 2.852 9
1.092 0.806 3.487 8
1.329 0.657 3.623 9
1.882 0.653 3.401 8
2.448 0.745 3.019 8
2.809 0.967 2.732 9
2.977 1.208 2.675 8
2.679 1.087 2.407 7
2.693 1.105 2.57 10
2.535 0.978 2.811 8
2.309 0.907 3.011 9
2.134 0.934 3.146 8
1.996 1.053 3.261 8
2.098 1.296 3.647 9
1.888 1.166 3.282 8
2.408 1.493 3.993 9
2.887 1.612 4.647 8
3.007 1.548 5.201 8
2.833 1.486 5.601 9
2.55 1.337 5.041 7
2.108 1.21 5.089 10
1.437 0.971 4.658 8
0.702 0.597 3.912 8
-0.004 0.153 2.927 9
-0.606 -0.215 1.847 8
-1.058 -0.369 0.965 9
-1.286 -0.322 0.346 8
-1.157 -0.29 0.311 8
-1.074 -0.141 -0.02 9
-0.819 0.13 -0.097 8
-0.534 0.418 -0.027 9
-0.26 0.645 0.016 6
0.04 0.826 -0.255 10
0.548 0.853 -1.037 9
0.493 0.767 -0.933 8
0.938 0.429 -2.225 9
1.187 -0.065 -3.444 8
1.158 -0.389 -4.069 8
0.541 -0.494 -4.277 9
-0.215 -0.536 -4.01 8
-0.62 -0.741 -3.303 8
-0.558 -0.667 -2.973 9
-0.703 -0.923 -2.252 8
-0.754 -1.059 -1.624 7
-0.862 -1.05 -1.228 10
-1.036 -0.92 -1.237 8
-1.174 -0.717 -1.706 9
-1.256 -0.481 -2.273 8
-1.13 -0.433 -2.045 9
-1.142 -0.14 -2.17 8
-0.872 0.131 -1.695 8
-0.231 0.249 -0.855 9
0.56 0.251 0.076 8
1.283 0.137 0.858 9
1.154 0.124 0.773 8
1.695 -0.217 1.12 7
1.8 -0.743 0.924 10
1.372 -1.27 0.395 8
0.636 -1.603 -0.104 9
-0.046 -1.757 -0.466 8
-0.346 -1.938 -0.774 8
-0.312 -1.744 -0.696 9
-0.248 -1.878 -0.891 8
-0.061 -1.832 -0.927 9
0.175 -1.62 -0.827 8
0.66 -1.417 -0.516 8
1.203 -1.414 -0.435 9
1.083 -1.273 -0.392 6
1.255 -1.334 -0.904 11
1.026 -1.238 -1.611 8
0.418 -0.885 -2.121 8
-0.422 -0.416 -2.287 9
-1.211 -0.04 -2.118 8
-1.73 0.199 -1.725 8
-1.901 0.31 -1.408 9
-1.711 0.279 -1.267 8
-1.589 0.295 -1.221 9
-1.128 0.34 -1.295 8
-0.497 0.5 -1.244 8
0.133 0.747 -0.874 7
0.561 0.971 -0.375 10
0.505 1.219 -0.077 9
0.454 1.097 -0.069 8
0.737 1.366 0.003 8
0.659 1.442 -0.072 9
0.527 1.34 -0.195 8
0.249 1.096 -0.4 9
-0.247 0.753 -0.528 8
-0.222 0.678 -0.475 8
-0.813 0.409 -0.134 9
-1.253 0.329 0.559 8
-1.405 0.437 1.233 7
-1.155 0.611 1.663 10
-0.591 0.75 1.53 8
0.129 0.817 0.791 9
0.116 0.736 0.712 8
0.874 0.744 -0.299 8
1.273 0.711 -1.261 9
1.142 0.661 -1.828 8
0.735 0.575 -1.889 9
0.117 0.333 -1.727 8
-0.795 0.016 -1.343 8
-0.715 0.014 -1.208 9
-1.738 -0.146 -0.481 7
-2.418 -0.25 0.233 10
-2.862 -0.313 0.507 8
-3.266 -0.095 0.559 8
-3.148 0.141 0.698 9
-2.593 0.08 0.643 8
-2.334 0.072 0.579 9
-1.853 -0.044 0.375 8
-1.557 -0.147 0.299 8
-1.475 -0.29 0.371 9
-1.602 -0.396 0.68 8
-1.808 -0.518 1.18 9
-1.627 -0.466 1.062 6
-1.679 -0.68 1.503 10
-1.369 -0.895 1.749 9
-0.834 -0.914 1.818 8
-0.229 -0.865 1.74 9
0.37 -0.816 1.512 8
0.753 -0.59 1.232 8
0.678 -0.531 1.109 9
0.853 -0.291 0.92 8
0.921 -0.2 0.687 8
0.91 -0.153 0.355 9
0.807 -0.064 0.018 8
0.568 0.036 -0.288 7
0.267 0.118 -0.492 10
0.24 0.106 -0.442 8
-0.002 0.158 -0.505 9
-0.154 0.17 -0.533 8
-0.239 0.164 -0.577 9
-0.268 0.143 -0.608 8
-0.213 0.088 -0.608 8
-0.108 0.019 -0.578 9
-0.097 0.017 -0.52 8
0.006 -0.044 -0.529 9
0.081 -0.104 -0.582 8
0.1 -0.148 -0.62 7
0.075 -0.17 -0.619 10
0.072 -0.188 -0.607 8
0.187 -0.197 -0.573 9
0.168 -0.177 -0.516 8
0.381 -0.16 -0.46 8
0.58 -0.126 -0.406 9
0.699 -0.092 -0.366 8
0.706 -0.044 -0.319 8
0.62 0.012 -0.27 9
0.512 0.07 -0.23 8
0.461 0.063 -0.207 9
0.438 0.115 -0.165 6
0.498 0.153 -0.115 10
0.556 0.186 -0.046 9
0.554 0.243 0.02 8
0.465 0.393 0.041 9
0.419 0.354 0.036 8
0.211 0.593 0.051 8
-0.117 0.813 0.08 9
-0.418 0.952 0.156 8
-0.581 1.04 0.352 9
-0.614 1.105 0.591 8
-0.466 1.088 0.835 8
-0.419 0.98 0.751 7
-0.119 0.934 1.016 10
0.199 0.847 1.189 9
0.46 0.675 1.287 8
0.702 0.572 1.317 8
1.019 0.627 1.218 9
1.377 0.704 1.043 8
1.239 0.634 0.939 9
1.577 0.62 0.778 8
1.79 0.463 0.655 8
1.847 0.208 0.57 9
1.82 -0.113 0.498 8
1.749 -0.504 0.418 7
1.63 -0.861 0.291 10
1.467 -0.775 0.262 8
1.309 -1.113 0.047 9
1.116 -1.402 -0.302 8
0.938 -1.649 -0.764 8
0.825 -1.933 -1.067 9
0.76 -2.114 -1.119 8
0.756 -2.145 -1.164 9
0.68 -1.931 -1.047 8
0.719 -1.952 -1.171 8
0.633 -1.853 -1.418 9
0.726 -1.661 -1.669 7
1.065 -1.532 -1.745 10
1.299 -1.474 -1.725 8
1.169 -1.326 -1.553 8
1.321 -1.406 -1.466 9
1.336 -1.562 -1.321 8
1.123 -1.707 -1.194 9
0.639 -1.778 -1.13 8
0.097 -1.756 -1.067 8
-0.253 -1.571 -0.945 9
-0.228 -1.414 -0.851 8
-0.462 -1.104 -0.782 9
-0.625 -0.74 -0.833 6
-0.685 -0.359 -1.009 10
-0.665 -0.05 -1.195 9
-0.589 0.169 -1.355 8
-0.441 0.308 -1.559 8
-0.397 0.277 -1.403 9
-0.236 0.359 -1.602 8
-0.098 0.362 -1.671 9
0.08 0.322 -1.553 8
0.345 0.329 -1.242 8
0.571 0.42 -0.846 9
0.829 0.464 -0.401 8
0.746 0.418 -0.361 7
1.066 0.298 0.104 10
1.196 0.146 0.359 8
1.152 0.053 0.394 9
1.006 0.015 0.405 8
0.746 0.024 0.429 9
0.503 0.003 0.507 8
0.453 0.003 0.456 8
0.301 -0.154 0.581 9
0.07 -0.37 0.636 8
-0.347 -0.333 0.606 8
-0.845 -0.066 0.544 9
-0.76 -0.059 0.489 7
-1.165 0.194 0.435 10
-1.388 0.419 0.452 8
-1.407 0.557 0.643 8
-1.281 0.607 0.928 9
-1.099 0.662 1.142 8
-0.984 0.716 1.248 9
-0.963 0.754 1.274 8
-0.867 0.678 1.147 8
-1.003 0.859 1.313 9
-1.26 1.187 1.625 8
-1.225 1.524 1.918 9
-0.709 1.806 2.13 6
0.06 1.94 2.335 10
0.985 1.849 2.58 9
0.886 1.664 2.322 8
1.7 1.456 2.491 9
2.028 1.264 2.632 8
1.81 1.182 2.789 8
1.133 1.228 2.869 9
0.336 1.38 2.829 8
-0.235 1.6 2.601 9
-0.212 1.44 2.341 8
-0.396 1.666 1.975 8
-0.305 1.779 1.502 7
-0.015 1.758 1.133 10
0.368 1.693 0.823 9
0.701 1.62 0.483 8
0.631 1.458 0.435 8
0.782 1.419 0.082 9
0.661 1.332 -0.355 8
0.363 1.116 -0.798 8
-0.026 0.863 -1.295 9
-0.365 0.622 -1.725 8
-0.588 0.351 -1.768 9
-0.529 0.316 -1.591 8
-0.561 0.095 -1.117 7
-0.381 -0.014 -0.382 10
0.062 -0.176 0.404 8
0.743 -0.403 1.119 9
1.369 -0.609 1.533 8
1.86 -0.871 1.575 8
1.674 -0.784 1.417 9
1.816 -1.056 1.086 8
1.458 -1.179 0.541 9
0.732 -1.166 0.016 8
-0.17 -1.041 -0.231 8
-0.88 -0.867 -0.054 9
-0.792 -0.78 -0.049 6
-1.195 -0.643 0.307 11
-1.273 -0.586 0.632 8
-1.09 -0.608 0.861 8
-0.863 -0.626 0.963 9
-0.717 -0.667 0.967 8
-0.649 -0.718 0.965 8
-0.777 -0.649 0.94 9
-0.699 -0.584 0.846 8
-0.975 -0.447 0.791 9
-1.257 -0.323 0.73 8
-1.489 -0.217 0.662 8
-1.626 -0.142 0.577 7
-1.738 -0.104 0.391 10
-1.565 -0.094 0.352 9
-1.704 -0.122 0.038 8
-1.921 -0.173 -0.245 8
-2.252 -0.188 -0.275 9
-2.503 -0.171 -0.087 8
-2.534 -0.067 -0.057 9
-2.382 0.113 -0.255 8
-2.144 0.102 -0.23 8
-1.909 0.228 -0.42 9
-1.684 0.211 -0.689 8
-1.577 0.055 -1.097 7
-1.616 -0.146 -1.613 10
-1.593 -0.382 -2.163 8
-1.428 -0.706 -2.619 9
-1.285 -0.635 -2.357 8
-1.524 -0.741 -2.785 8
-2.128 -0.307 -2.73 9
-2.435 0.298 -2.201 8
-2.063 0.357 -1.819 9
-1.293 0.069 -1.672 8
-0.651 -0.193 -1.586 8
-0.586 -0.174 -1.428 9
-0.159 -0.528 -1.439 7
0.002 -0.916 -1.564 10
-0.032 -1.288 -1.639 8
-0.117 -1.454 -1.55 8
-0.148 -1.333 -1.448 9
0.016 -1.115 -1.449 8
0.015 -1.003 -1.304 9
0.413 -0.749 -1.317 8
0.852 -0.479 -1.4 8
1.07 -0.383 -1.62 9
0.941 -0.452 -1.774 8
0.511 -0.513 -1.78 9
0.46 -0.462 -1.602 6
-0.152 -0.584 -1.709 10
-0.657 -0.778 -1.872 9
-1.061 -0.871 -1.925 8
-1.534 -0.83 -1.899 9
-1.858 -0.603 -1.774 8
-1.867 -0.362 -1.604 8
-1.68 -0.326 -1.444 9
-1.347 -0.355 -1.38 8
-0.848 -0.496 -1.454 9
-0.448 -0.481 -1.431 8
-0.224 -0.17 -1.2 8
-0.073 0.247 -1.023 7
0.132 0.49 -1.006 10
0.119 0.441 -0.905 8
0.3 0.595 -0.831 9
0.373 0.689 -0.623 8
0.361 0.637 -0.4 9
0.232 0.485 -0.148 8
-0.029 0.344 0.079 8
-0.253 0.26 0.206 9
-0.227 0.234 0.186 8
-0.349 0.196 0.214 9
-0.424 0.182 0.121 8
-0.457 0.185 -0.052 7
-0.536 0.218 -0.182 10
-0.71 0.337 -0.206 8
-0.639 0.303 -0.186 9
-0.798 0.45 -0.167 8
-0.863 0.578 0.121 8
-0.882 0.701 0.286 9
-0.861 0.768 0.415 8
-0.58 0.714 0.485 9
-0.3 0.661 0.489 8
-0.27 0.595 0.44 8
-0.363 0.742 0.428 9
-0.544 1.023 0.413 6
-0.502 1.186 0.396 10
-0.191 1.181 0.363 9
0.058 1.162 0.342 8
0.078 1.14 0.513 9
0.071 1.026 0.462 8
-0.056 0.981 0.783 8
-0.246 0.898 1.088 9
-0.392 0.786 1.365 8
-0.44 0.674 1.558 9
-0.334 0.588 1.608 8
-0.064 0.542 1.509 8
-0.058 0.488 1.358 7
0.231 0.474 1.201 10
0.391 0.48 1.035 9
0.472 0.482 0.889 8
0.517 0.472 0.779 8
0.49 0.465 0.687 9
0.421 0.431 0.586 8
0.379 0.388 0.527 9
0.346 0.349 0.366 8
0.429 0.321 0.12 8
0.57 0.334 -0.087 9
0.692 0.354 -0.23 8
0.623 0.319 -0.207 7
0.733 0.298 -0.239 10
0.774 0.314 -0.061 8
0.759 0.345 0.171 9
0.733 0.296 0.325 8
0.713 0.2 0.408 8
0.696 0.09 0.397 9
0.661 0.005 0.337 8
0.595 0.005 0.303 9
0.544 -0.021 0.29 8
0.524 -0.011 0.304 8
0.61 0.006 0.313 9
0.748 0.014 0.384 7
0.766 0.042 0.493 10
0.641 0.071 0.542 8
0.576 0.064 0.487 8
0.393 0.064 0.485 9
0.193 0.085 0.444 8
0.018 0.17 0.296 9
-0.098 0.253 -0.062 8
-0.15 0.341 -0.415 8
-0.139 0.471 -0.509 9
-0.125 0.424 -0.458 8
-0.072 0.501 -0.404 9
-0.049 0.498 -0.26 6
-0.074 0.462 -0.025 10
-0.12 0.437 0.201 9
-0.173 0.408 0.348 8
-0.156 0.367 0.313 9
-0.21 0.3 0.343 8
-0.256 0.213 0.232 8
-0.278 0.071 -0.001 9
-0.271 0.016 -0.189 8
-0.137 0.047 -0.18 8
0.048 -0.05 -0.131 9
0.043 -0.045 -0.118 8
0.1 -0.204 -0.08 7
0.061 -0.353 -0.006 10
-0.011 -0.477 0.079 8
-0.074 -0.569 0.138 9
-0.158 -0.566 0.13 8
-0.227 -0.504 0.061 9
-0.204 -0.454 0.055 8
-0.211 -0.43 -0.123 8
-0.195 -0.376 -0.206 9
-0.137 -0.309 -0.108 8
-0.012 -0.266 -0.022 9
0.124 -0.235 0.019 8
0.112 -0.212 0.017 7
0.194 -0.191 0.054 10
0.199 -0.17 0.124 8
0.133 -0.156 0.207 9
0.048 -0.177 0.294 8
-0.055 -0.193 0.346 8
-0.26 -0.144 0.363 9
-0.234 -0.129 0.326 8
-0.402 -0.101 0.385 8
-0.36 -0.183 0.426 9
-0.178 -0.184 0.414 8
0.035 -0.097 0.315 9
0.167 -0.077 0.189 6
0.138 -0.057 0.157 10
0.124 -0.052 0.141 9
0.003 -0.032 0.175 8
-0.094 -0.054 0.224 9
-0.121 -0.151 0.274 8
-0.147 -0.17 0.318 8
-0.123 -0.164 0.363 9
0.025 -0.239 0.379 8
0.022 -0.215 0.341 9
0.14 -0.233 0.369 8
0.157 -0.244 0.425 8
0.1 -0.266 0.473 7
0.036 -0.255 0.492 10
-0.016 -0.236 0.419 9
-0.091 -0.209 0.291 8
-0.082 -0.188 0.262 8
-0.181 -0.127 0.158 9
-0.302 -0.098 0.072 8
-0.388 -0.126 -0.013 9
-0.345 -0.118 -0.101 8
-0.194 -0.049 -0.185 8
-0.175 -0.044 -0.166 9
-0.028 0.053 -0.149 8
0.048 0.145 -0.254 7
0.061 0.193 -0.216 10
0.01 0.198 -0.138 8
-0.116 0.143 -0.009 9
-0.272 0.071 0.107 8
-0.245 0.064 0.097 8
-0.345 -0.009 0.156 9
-0.346 -0.074 0.166 8
-0.207 -0.056 0.105 9
0.01 0.003 0.003 8
0.196 0.069 -0.086 8
0.325 0.125 -0.15 9
0.293 0.112 -0.135 6
0.331 0.107 -0.181 11
0.247 0.069 -0.166 8
0.078 0.095 -0.188 8
-0.043 0.138 -0.315 9
-0.156 0.155 -0.423 8
-0.284 0.171 -0.458 9
-0.255 0.154 -0.413 8
-0.316 0.162 -0.375 8
-0.27 0.168 -0.272 9
-0.072 0.193 -0.159 8
0.161 0.226 -0.037 8
0.145 0.204 -0.034 7
0.237 0.205 0.09 10
0.144 0.154 0.181 9
-0.097 0.117 0.22 8
-0.362 0.12 0.187 8
-0.568 0.153 0.002 9
-0.667 0.163 -0.335 8
-0.737 0.15 -0.683 9
-0.664 0.135 -0.615 8
-0.729 0.139 -0.819 8
-0.6 0.112 -0.847 9
-0.338 0.055 -0.745 8
-0.123 0.006 -0.468 7
-0.015 -0.032 -0.119 10
# end
#Thu Feb 26 20:40:13 GMT+08:00 20159
