# Supplementary material for: Abnormal Gait Behavior Detection for Elderly Based on Enhanced Wigner-Ville Analysis and Cloud Incremental SVM Learning
Source: Hindawi journal article supplement (doi:10.1155/2016/5869238), 2016-01-01
Supplement: f1 [file 5869238.f1.zip › Supplementary Materials/Original Data/Leftward fall Ending recovery/original__129.txt]

# Accelerometer Values
# filename:  original__129.txt
# Saving start time: Thu Feb 26 20:40:15 GMT+08:00 2015

# sensor resolution: 0.0095825195m/s^2
#Sensorvendor: KIONIX, name: KX023 Accelerometer, type: 1,version : 1, range 39.240005

# X value, Y value, Z value, time diff in ms
-0.181 -0.112 -0.341 10
-0.154 -0.096 -0.241 9
-0.105 -0.123 -0.063 8
-0.015 -0.137 0.152 8
0.061 -0.148 0.358 9
0.079 -0.173 0.519 8
0.071 -0.156 0.467 9
0.066 -0.178 0.558 8
0.04 -0.182 0.563 8
-0.025 -0.179 0.488 9
-0.078 -0.167 0.364 8
-0.07 -0.15 0.327 7
-0.041 -0.134 0.206 10
0.033 -0.121 0.108 8
0.055 -0.121 0.023 9
0.01 -0.129 0.0 8
-0.037 -0.14 0.083 8
-0.059 -0.159 0.189 9
-0.076 -0.175 0.238 8
-0.068 -0.157 0.214 9
-0.093 -0.15 0.216 8
-0.124 -0.145 0.184 8
-0.136 -0.156 0.134 9
-0.13 -0.151 0.095 6
-0.099 -0.135 0.071 11
-0.063 -0.133 0.069 8
-0.057 -0.12 0.062 8
-0.044 -0.123 0.047 9
-0.06 -0.112 -0.032 8
-0.083 -0.066 -0.129 9
-0.098 -0.009 -0.247 8
-0.104 0.018 -0.449 8
-0.13 0.016 -0.645 9
-0.117 0.015 -0.58 8
-0.218 -0.01 -0.718 9
-0.3 -0.103 -0.858 6
-0.377 -0.131 -1.039 10
-0.467 -0.054 -1.128 9
-0.473 -0.071 -1.112 8
-0.426 -0.064 -1.001 8
-0.419 -0.179 -0.948 9
-0.412 -0.299 -0.772 8
-0.322 -0.435 -0.536 9
-0.11 -0.589 -0.311 8
0.093 -0.672 -0.156 8
0.204 -0.68 -0.127 9
0.183 -0.612 -0.114 8
0.238 -0.59 -0.221 7
0.246 -0.548 -0.412 10
0.222 -0.514 -0.587 8
0.188 -0.499 -0.696 9
0.161 -0.511 -0.805 8
0.361 -0.599 -0.877 9
0.325 -0.539 -0.789 8
0.542 -0.717 -0.937 8
0.496 -0.821 -1.147 9
0.497 -0.858 -1.258 8
0.569 -1.019 -1.285 8
0.545 -1.208 -1.325 9
0.491 -1.087 -1.192 7
0.384 -1.164 -1.285 10
0.206 -1.149 -1.362 8
0.045 -1.055 -1.448 8
0.057 -0.853 -1.479 9
0.183 -0.624 -1.476 8
0.295 -0.483 -1.524 9
0.266 -0.435 -1.371 8
0.303 -0.448 -1.462 8
0.251 -0.599 -1.48 9
0.175 -0.789 -1.292 8
0.046 -0.915 -0.96 9
-0.161 -0.961 -0.687 6
-0.341 -1.005 -0.524 10
-0.306 -0.905 -0.471 9
-0.401 -0.973 -0.374 8
-0.385 -1.022 -0.274 9
-0.268 -0.952 -0.051 8
-0.159 -0.751 0.243 8
-0.051 -0.546 0.501 9
0.114 -0.389 0.834 8
0.102 -0.35 0.751 9
0.271 -0.177 1.131 8
0.435 0.061 1.337 8
0.629 0.36 1.296 7
0.9 0.672 0.997 10
1.22 0.975 0.632 8
1.605 1.242 0.491 9
1.444 1.117 0.442 8
1.799 1.258 0.589 9
1.905 1.287 0.853 8
1.826 1.295 1.096 8
1.696 1.316 1.339 9
1.661 1.518 1.499 8
1.864 1.93 1.487 9
1.678 1.737 1.338 8
2.088 2.124 1.277 7
2.393 2.361 1.572 10
2.365 2.447 2.508 8
1.994 2.427 3.72 9
1.514 2.426 4.603 8
1.362 2.183 4.143 8
1.053 2.221 4.502 9
0.976 2.239 4.468 8
1.262 2.17 4.102 9
1.936 1.953 3.46 8
2.653 1.792 3.001 8
3.027 1.906 3.211 9
2.724 1.716 2.89 6
2.756 1.91 3.655 11
2.528 1.852 4.357 8
1.941 1.556 4.781 8
1.121 1.212 4.785 9
0.573 1.15 4.137 8
0.512 1.236 2.736 8
0.461 1.112 2.462 9
0.736 1.081 0.741 8
1.104 1.028 -0.694 9
1.191 0.768 -1.526 8
0.809 0.191 -1.737 8
0.034 -0.069 -1.415 7
-0.8 0.187 -0.827 10
-0.72 0.168 -0.744 9
-1.28 0.419 -0.312 8
-1.452 0.536 -0.094 8
-1.279 0.591 -0.057 9
-0.857 0.529 -0.202 8
-0.218 0.314 -0.391 9
-0.196 -0.175 -0.736 8
-0.177 -0.158 -0.662 8
2.151 -1.151 -1.307 9
2.678 -1.947 -1.8 8
2.082 -2.482 -2.121 7
0.868 -2.678 -2.23 10
-0.38 -2.25 -1.97 8
-0.342 -2.025 -1.773 9
-1.051 -1.742 -1.371 8
-1.095 -1.522 -1.011 9
-0.718 -1.252 -1.147 8
-0.097 -0.864 -1.805 8
0.597 -0.319 -2.771 9
1.105 0.085 -3.789 8
0.995 0.077 -3.41 8
1.196 0.264 -4.082 9
1.099 0.264 -3.827 7
0.805 0.033 -2.624 10
0.522 -0.483 -1.028 8
0.451 -1.283 0.515 8
0.575 -2.281 1.757 9
0.517 -2.053 1.581 8
0.328 -2.784 2.334 9
-0.453 -2.774 2.449 8
-0.966 -2.195 2.095 8
-0.563 -1.496 1.355 9
0.296 -0.706 0.281 8
1.285 0.022 -1.074 9
1.156 0.02 -0.966 6
2.227 0.08 -2.507 10
2.94 -0.634 -3.771 9
2.687 -1.496 -4.189 8
1.492 -2.035 -3.581 9
-0.097 -2.426 -2.407 8
-1.487 -2.536 -1.036 8
-1.338 -2.282 -0.932 9
-1.829 -1.97 0.344 8
-1.204 -1.372 1.212 8
-0.148 -0.584 1.488 9
0.786 0.233 0.916 8
0.708 0.21 0.825 7
1.28 0.855 -0.511 10
1.338 1.193 -2.1 8
0.907 1.145 -3.358 9
-0.062 0.938 -4.034 8
-1.278 0.836 -4.199 9
-2.154 0.835 -4.009 8
-1.993 1.012 -3.479 8
-1.794 0.911 -3.131 9
-0.499 1.301 -2.354 8
0.917 1.726 -1.721 9
1.181 2.157 -1.534 8
0.038 2.529 -1.501 7
-1.84 2.641 -1.265 10
-3.712 2.569 -0.724 8
-3.341 2.312 -0.651 9
-4.563 2.236 0.219 8
-4.868 2.173 1.352 8
-4.438 2.046 2.494 9
-3.554 1.784 3.352 8
-2.586 1.468 3.632 9
-1.748 1.071 3.301 8
-1.573 0.964 2.971 8
-0.956 0.437 2.48 9
-0.46 -0.118 2.109 6
-0.012 -0.612 1.88 10
0.353 -0.959 1.714 9
0.566 -1.053 1.414 8
0.509 -0.948 0.719 9
0.553 -0.853 0.647 8
0.372 -0.425 -0.243 8
0.076 -0.051 -0.949 9
-0.097 0.196 -1.389 8
-0.134 0.313 -1.471 9
-0.166 0.304 -1.198 8
-0.15 0.274 -1.079 8
-0.265 0.12 -0.574 7
-0.344 -0.171 0.142 10
-0.295 -0.475 0.846 9
-0.231 -0.675 1.273 8
-0.239 -0.754 1.406 8
-0.244 -0.753 1.25 9
-0.219 -0.678 1.125 8
-0.176 -0.651 0.822 9
-0.125 -0.614 0.572 8
-0.068 -0.582 0.499 8
-0.033 -0.552 0.584 9
-0.03 -0.518 0.667 8
-0.027 -0.466 0.601 7
-0.003 -0.446 0.564 10
0.024 -0.439 0.39 8
-0.021 -0.43 0.108 9
-0.108 -0.457 -0.175 8
-0.085 -0.538 -0.326 8
0.022 -0.58 -0.343 9
0.067 -0.586 -0.166 8
0.061 -0.528 -0.149 9
0.018 -0.557 0.176 8
-0.272 -0.263 0.359 8
-0.494 -0.127 0.447 9
-0.211 -0.577 0.513 7
-0.027 -0.602 0.565 10
-0.024 -0.542 0.509 8
-0.098 -0.263 0.603 8
-0.114 -0.132 0.619 9
-0.257 0.237 0.543 8
-0.166 0.298 0.447 9
0.309 0.089 0.247 8
0.599 0.186 0.028 8
0.539 0.168 0.026 9
0.539 0.286 -0.005 8
0.354 0.304 0.074 9
0.073 0.292 0.201 6
-0.163 0.248 0.342 10
-0.291 0.195 0.472 9
-0.321 0.143 0.552 8
-0.289 0.129 0.497 8
-0.238 0.063 0.55 9
-0.09 -0.02 0.645 8
0.087 -0.063 0.764 9
0.206 -0.082 0.857 8
0.268 -0.162 0.894 8
0.298 -0.28 0.883 9
0.268 -0.252 0.795 8
0.231 -0.297 0.755 7
0.155 -0.291 0.63 10
0.171 -0.312 0.351 8
0.334 -0.311 -0.029 9
0.506 -0.291 -0.363 8
0.535 -0.291 -0.518 9
0.481 -0.262 -0.467 8
0.36 -0.321 -0.407 8
0.011 -0.224 -0.224 9
-0.145 -0.323 -0.004 8
-0.044 -0.613 0.067 9
-0.112 -0.61 -0.03 8
-0.101 -0.549 -0.027 7
-0.193 -0.469 -0.222 10
-0.168 -0.407 -0.564 8
-0.07 -0.33 -0.933 9
0.063 -0.241 -1.144 8
0.204 -0.137 -1.162 8
0.306 -0.026 -1.046 9
0.276 -0.023 -0.941 8
0.343 0.086 -0.797 9
0.39 0.227 -0.74 8
0.408 0.412 -0.739 8
0.373 0.578 -0.717 9
0.193 0.733 -0.652 6
-0.132 0.942 -0.495 10
-0.119 0.848 -0.445 9
-0.445 1.07 -0.167 8
-0.659 1.215 0.165 9
-0.711 1.258 0.448 8
-0.489 1.236 0.712 8
0.108 1.144 1.068 9
0.825 0.972 1.516 8
0.743 0.875 1.364 9
1.195 0.594 1.761 8
1.182 0.168 2.08 8
0.779 -0.358 2.335 7
0.371 -0.848 2.374 10
0.297 -1.176 2.143 9
0.267 -1.376 1.742 8
0.498 -1.238 1.568 8
0.826 -1.42 1.147 9
0.989 -1.474 0.646 8
1.239 -1.496 0.158 8
1.504 -1.683 -0.471 9
1.487 -1.924 -1.303 8
1.339 -1.731 -1.173 9
1.255 -1.862 -1.737 8
1.111 -1.843 -1.99 7
1.008 -1.774 -2.103 10
1.064 -1.708 -1.925 8
1.34 -1.658 -1.343 9
1.254 -1.125 -0.759 8
1.128 -1.012 -0.683 8
0.984 -0.916 -0.227 9
1.119 -1.465 -0.065 8
1.065 -1.745 -0.225 9
0.557 -1.513 -0.609 8
-0.075 -0.977 -1.294 8
-0.338 -0.698 -1.968 9
-0.304 -0.629 -1.771 7
-0.29 -0.472 -2.223 10
0.032 -0.382 -2.288 8
0.437 -0.32 -1.996 8
0.702 -0.276 -1.496 9
0.653 -0.292 -0.908 8
0.405 -0.188 -0.36 9
0.364 -0.169 -0.324 8
0.021 0.282 -0.122 8
-0.176 0.439 -0.34 9
-0.015 0.131 -0.773 8
-0.028 0.039 -1.167 8
-0.025 0.035 -1.05 7
-0.312 0.049 -1.266 10
-0.483 -0.087 -1.322 9
-0.568 -0.241 -1.103 8
-0.721 -0.361 -0.663 8
-0.911 -0.393 -0.225 9
-1.215 -0.282 0.293 8
-1.555 -0.042 0.879 9
-1.399 -0.038 0.791 8
-1.464 0.301 1.22 8
-1.282 0.586 1.382 9
-1.113 0.726 1.295 8
-1.075 0.8 1.043 7
-1.16 0.876 0.872 10
-1.06 0.919 0.972 8
-0.954 0.827 0.875 9
-0.535 0.86 1.252 8
-0.116 1.001 1.722 9
0.087 1.153 2.165 8
0.211 1.214 2.479 8
0.283 1.46 2.656 9
0.071 1.827 2.712 8
0.064 1.644 2.441 9
-0.088 1.519 2.471 8
-0.05 1.125 2.388 7
-0.193 0.91 2.091 10
-0.183 1.178 2.228 8
0.255 1.847 2.613 8
0.817 2.097 2.421 9
0.735 1.888 2.179 8
1.073 1.496 1.554 9
1.064 0.819 0.968 8
0.829 0.409 0.797 8
0.592 0.342 1.128 9
0.381 0.365 1.423 8
0.343 0.329 1.281 9
0.124 0.231 1.095 6
-0.043 -0.058 0.801 10
-0.198 -0.168 0.826 9
-0.421 0.066 0.963 8
-0.535 0.386 1.056 9
-0.382 0.543 1.12 8
-0.344 0.489 1.008 8
-0.025 0.385 0.981 9
0.374 0.112 0.867 8
0.656 -0.161 0.727 9
0.57 -0.152 0.493 8
0.238 0.028 0.11 8
0.215 0.025 0.099 7
-0.084 0.12 -0.319 10
-0.292 0.135 -0.537 8
-0.423 0.025 -0.485 9
-0.404 -0.192 -0.306 8
-0.249 -0.417 0.087 9
0.006 -0.601 0.786 8
0.396 -0.712 1.65 8
0.356 -0.641 1.485 9
0.644 -0.774 2.111 8
0.519 -0.803 2.292 9
0.111 -0.662 2.229 8
-0.398 -0.514 1.85 7
-1.062 -0.319 1.037 10
-0.956 -0.287 0.933 8
-1.747 0.016 0.068 9
-2.527 0.402 -0.409 8
-3.006 0.781 -0.506 8
-2.816 0.927 -0.44 9
-2.029 0.803 -0.29 8
-1.04 0.611 -0.229 9
-0.936 0.55 -0.206 8
-0.211 0.389 -0.461 8
-0.138 0.204 -1.005 9
-0.739 -0.046 -1.567 6
-1.748 -0.325 -1.866 11
-2.333 -0.884 -1.874 8
-2.425 -1.526 -1.82 8
-2.182 -1.373 -1.638 9
-2.575 -1.153 -1.543 8
-3.174 0.012 -1.111 9
-3.577 1.194 -0.775 8
-2.986 1.31 -0.888 8
-1.656 0.532 -1.365 9
-0.832 0.032 -2.077 8
-0.749 0.029 -1.869 8
-0.543 -0.186 -2.518 7
-0.785 -0.417 -2.989 10
-1.354 -0.614 -3.24 9
-1.721 -0.875 -3.127 8
-2.0 -0.991 -2.819 8
-1.8 -0.892 -2.537 9
-2.186 -0.568 -2.253 8
-2.157 0.068 -1.929 9
-1.326 0.242 -1.771 8
-0.087 -0.051 -1.976 8
0.812 -0.169 -2.285 9
1.306 -0.254 -2.474 8
1.176 -0.228 -2.227 7
1.332 -0.601 -2.411 10
0.932 -0.996 -2.428 8
0.216 -1.183 -2.063 9
-0.422 -1.357 -1.609 8
-0.942 -1.497 -1.287 8
-1.309 -1.495 -1.0 9
-1.178 -1.345 -0.9 8
-1.341 -1.259 -0.694 9
-1.233 -1.173 -0.578 8
-0.821 -1.114 -0.552 8
-0.33 -1.042 -0.694 9
-0.297 -0.938 -0.625 7
0.161 -0.832 -1.3 10
0.145 -0.749 -1.17 8
0.175 -0.631 -1.372 8
0.15 -0.575 -1.403 9
0.087 -0.545 -1.245 8
-0.011 -0.509 -1.025 9
-0.057 -0.365 -0.731 8
-0.051 -0.328 -0.657 8
-0.102 -0.21 -0.535 9
-0.235 -0.291 -0.767 8
-0.482 -0.278 -0.503 9
-0.838 -0.075 0.128 6
-0.95 0.033 0.202 10
-0.758 0.112 -0.012 9
-0.682 0.101 -0.011 8
-0.415 0.327 -0.165 9
-0.111 0.536 -0.244 8
0.07 0.677 -0.278 8
0.03 0.818 -0.288 9
-0.154 0.932 -0.315 8
-0.331 0.997 -0.415 8
-0.298 0.898 -0.373 9
-0.37 0.959 -0.599 8
-0.346 0.942 -0.864 7
-0.338 0.919 -0.989 10
-0.51 1.056 -0.72 8
-0.792 1.296 -0.1 9
-0.713 1.338 0.476 8
-0.641 1.204 0.429 9
-0.364 0.935 0.741 8
-0.002 0.68 0.883 8
0.264 0.598 1.106 9
0.516 0.623 1.388 8
0.712 0.693 1.565 9
0.641 0.624 1.409 8
0.701 0.719 1.518 7
0.626 0.833 1.641 10
0.443 0.884 1.759 8
0.209 0.867 1.821 9
-0.02 0.799 1.895 8
-0.201 0.679 1.974 8
-0.181 0.611 1.776 9
-0.272 0.388 1.803 8
-0.305 0.201 1.762 9
-0.323 0.173 1.735 8
-0.309 0.106 1.675 8
-0.241 0.011 1.467 9
-0.217 0.01 1.32 6
0.006 0.008 1.052 10
0.355 0.069 0.782 9
0.615 0.163 0.539 8
0.721 0.223 0.36 9
0.706 0.249 0.25 8
0.631 0.266 0.216 8
0.585 0.194 0.229 9
0.526 0.175 0.206 8
0.502 0.102 0.166 9
0.443 0.179 0.02 8
0.477 0.269 -0.063 8
0.699 0.242 -0.089 7
0.898 0.22 -0.126 10
0.808 0.198 -0.114 9
0.848 0.193 -0.069 8
0.761 0.148 0.034 8
0.606 0.071 0.136 9
0.436 -0.019 0.207 8
0.278 -0.097 0.23 8
0.161 -0.121 0.21 9
0.145 -0.109 0.189 8
0.129 -0.059 0.128 9
0.269 0.016 0.036 8
0.487 0.093 -0.045 7
0.668 0.159 -0.095 10
0.737 0.188 -0.089 8
0.671 0.193 -0.002 9
0.604 0.174 -0.002 8
0.454 0.181 0.128 8
0.287 0.185 0.278 9
0.174 0.18 0.394 8
0.11 0.172 0.414 9
0.079 0.165 0.323 8
0.065 0.161 0.16 8
0.059 0.144 0.144 9
0.052 0.14 -0.022 6
0.042 0.141 -0.154 11
0.028 0.13 -0.218 8
0.024 0.097 -0.19 8
0.047 0.068 -0.104 9
0.042 0.061 -0.093 8
0.079 0.042 -0.012 9
0.094 0.026 0.043 8
0.095 0.021 0.061 8
0.103 0.02 0.031 9
0.131 0.02 -0.039 8
0.149 0.028 -0.086 8
0.134 0.025 -0.077 7
0.105 0.031 -0.086 10
0.026 0.033 -0.067 9
-0.078 0.031 -0.02 8
-0.136 0.029 0.008 8
-0.116 0.027 0.011 9
-0.091 0.025 0.015 8
-0.082 0.023 0.013 9
-0.066 0.03 0.024 8
-0.012 0.038 0.002 8
0.051 0.043 -0.045 9
0.081 0.045 -0.082 8
0.073 0.04 -0.074 7
0.031 0.02 -0.157 10
0.028 0.018 -0.141 8
-0.059 0.003 -0.125 9
-0.139 -0.008 -0.079 8
-0.187 -0.017 -0.045 9
-0.233 -0.019 -0.017 8
-0.254 -0.016 -0.017 8
-0.228 -0.015 -0.016 9
-0.2 -0.007 -0.048 8
-0.081 -0.012 -0.058 9
0.042 0.014 -0.13 8
0.037 0.134 -0.195 7
0.032 0.155 -0.117 10
0.084 0.075 -0.049 8
0.076 0.067 -0.044 8
0.115 0.054 -0.025 9
0.118 0.056 -0.005 8
0.086 0.03 0.026 9
0.039 -0.004 0.083 8
0.0 -0.03 0.146 8
-0.049 -0.048 0.191 9
-0.044 -0.043 0.172 8
-0.088 -0.057 0.199 9
-0.077 -0.069 0.197 6
-0.018 -0.068 0.184 10
0.04 -0.058 0.178 9
0.082 -0.053 0.166 8
0.114 -0.048 0.137 9
0.102 -0.043 0.124 8
0.112 -0.03 0.082 8
0.058 -0.016 0.055 9
-0.033 -0.008 0.05 8
-0.112 -0.005 0.046 9
-0.152 -0.005 0.037 8
-0.137 -0.004 0.033 8
-0.127 -0.001 0.027 7
-0.076 0.003 0.027 10
0.005 0.012 0.03 9
0.11 0.025 0.023 8
0.213 0.033 0.008 8
0.272 0.046 -0.008 9
0.244 0.041 -0.007 8
0.258 0.058 -0.022 8
0.238 0.069 -0.043 9
0.195 0.087 -0.069 8
0.135 0.093 -0.095 9
0.068 0.073 -0.115 8
0.061 0.066 -0.103 7
0.013 0.033 -0.124 10
-0.008 0.008 -0.137 8
-0.012 0.006 -0.123 9
-0.025 0.005 -0.081 8
-0.033 0.006 -0.036 8
0.001 0.037 -0.025 9
0.001 0.075 -0.062 8
0.052 0.068 -0.056 9
0.058 0.097 -0.105 8
0.0 0.101 -0.126 8
-0.11 0.088 -0.112 9
-0.207 0.082 -0.082 6
-0.252 0.063 -0.081 11
-0.227 0.056 -0.073 8
-0.22 0.041 -0.124 8
-0.156 0.032 -0.195 9
-0.043 0.031 -0.243 8
0.072 0.032 -0.234 8
0.125 0.011 -0.168 9
0.091 -0.017 -0.066 8
0.082 -0.016 -0.059 9
-0.014 -0.037 0.036 8
-0.119 -0.055 0.1 8
-0.194 -0.06 0.096 7
-0.224 -0.05 0.012 10
-0.204 -0.025 -0.124 9
-0.14 0.007 -0.275 8
-0.126 0.006 -0.248 8
-0.018 0.041 -0.357 9
0.112 0.083 -0.361 8
0.209 0.112 -0.263 9
0.215 0.11 -0.116 8
0.138 0.1 0.029 8
0.124 0.09 0.117 9
0.017 0.081 0.105 8
-0.049 0.048 0.103 7
-0.037 0.021 0.051 10
0.024 0.025 0.012 8
0.086 0.057 0.037 9
0.125 0.053 0.108 8
0.112 0.048 0.098 8
0.115 0.029 0.191 9
0.093 0.038 0.226 8
0.094 0.033 0.156 9
0.101 0.08 0.022 8
0.082 0.173 -0.123 8
0.038 0.247 -0.223 9
0.034 0.222 -0.2 7
-0.025 0.263 -0.237 10
-0.07 0.253 -0.22 8
-0.064 0.217 -0.205 8
-0.013 0.162 -0.214 9
0.032 0.114 -0.229 8
0.062 0.092 -0.283 9
0.056 0.083 -0.254 8
0.089 0.079 -0.356 8
0.096 0.086 -0.413 9
0.045 0.09 -0.331 8
-0.028 0.082 -0.146 9
-0.025 0.074 -0.131 6
-0.056 0.024 0.249 10
-0.05 0.022 0.224 9
0.01 -0.047 0.341 8
0.027 -0.134 0.406 9
-0.033 -0.191 0.416 8
-0.13 -0.222 0.378 8
-0.202 -0.231 0.288 9
-0.182 -0.208 0.259 8
-0.242 -0.194 0.141 8
-0.26 -0.176 -0.003 9
-0.198 -0.184 -0.151 8
-0.097 -0.167 -0.175 7
-0.007 -0.088 -0.106 10
# end
#Thu Feb 26 20:40:20 GMT+08:00 2015
