# Supplementary material for: Abnormal Gait Behavior Detection for Elderly Based on Enhanced Wigner-Ville Analysis and Cloud Incremental SVM Learning
Source: Hindawi journal article supplement (doi:10.1155/2016/5869238), 2016-01-01
Supplement: f1 [file 5869238.f1.zip › Supplementary Materials/Original Data/Leftward fall Ending recovery/original__130.txt]

# Accelerometer Values
# filename:  original__130.txt
# Saving start time: Thu Feb 26 20:40:22 GMT+08:00 2015

# sensor resolution: 0.0095825195m/s^2
#Sensorvendor: KIONIX, name: KX023 Accelerometer, type: 1,version : 1, range 39.240005

# X value, Y value, Z value, time diff in ms
-0.362 -0.229 -0.345 10
-0.273 -0.278 -0.249 8
-0.246 -0.25 -0.224 8
-0.176 -0.268 -0.091 9
-0.122 -0.276 0.061 8
-0.073 -0.281 0.2 9
-0.037 -0.286 0.293 8
0.01 -0.274 0.337 8
0.009 -0.247 0.351 9
0.073 -0.222 0.316 8
0.113 -0.173 0.308 9
0.121 -0.136 0.273 6
0.096 -0.104 0.228 10
0.037 -0.082 0.183 9
-0.012 -0.066 0.129 8
-0.011 -0.059 0.116 9
-0.023 -0.045 0.078 8
0.006 -0.029 0.068 8
0.055 -0.02 0.057 9
0.086 -0.015 0.044 8
0.1 -0.016 0.034 8
0.093 -0.021 0.032 9
0.084 -0.019 0.028 8
0.067 -0.018 0.032 7
0.042 -0.018 0.018 10
0.006 -0.031 -0.012 8
-0.027 -0.047 -0.037 9
-0.063 -0.057 -0.059 8
-0.077 -0.055 -0.051 9
-0.069 -0.049 -0.046 8
-0.005 -0.038 -0.001 8
0.118 -0.025 0.026 9
0.211 -0.019 0.04 8
0.239 -0.016 0.047 9
0.227 -0.01 0.055 8
0.204 -0.009 0.049 7
0.167 -0.004 0.066 10
0.119 0.0 0.077 8
0.097 0.001 0.098 9
0.111 0.0 0.141 8
0.139 -0.011 0.216 8
0.158 -0.012 0.311 9
0.142 -0.011 0.279 8
0.162 -0.005 0.337 9
0.188 -0.004 0.315 8
0.222 0.001 0.213 8
0.236 0.017 0.078 9
0.201 0.054 -0.058 6
0.136 0.118 -0.185 10
0.122 0.106 -0.167 9
0.053 0.184 -0.272 8
0.0 0.235 -0.347 9
-0.034 0.223 -0.359 8
-0.046 0.171 -0.312 8
-0.033 0.11 -0.242 9
-0.015 0.049 -0.166 8
-0.013 0.044 -0.149 9
0.001 0.008 -0.093 8
0.012 -0.008 -0.069 8
0.013 -0.019 -0.084 7
0.0 -0.015 -0.135 10
-0.019 0.019 -0.197 9
-0.026 0.065 -0.247 8
-0.024 0.058 -0.223 8
-0.025 0.071 -0.25 9
-0.025 0.051 -0.253 8
-0.026 0.038 -0.243 9
-0.024 0.06 -0.228 8
-0.012 0.078 -0.212 8
-0.011 0.07 -0.19 9
0.018 0.054 -0.172 8
0.048 0.016 -0.155 7
0.05 -0.004 -0.149 10
0.035 0.016 -0.153 8
0.005 0.077 -0.142 9
-0.018 0.135 -0.128 8
-0.016 0.121 -0.116 8
-0.024 0.13 -0.122 9
-0.031 0.118 -0.128 8
-0.035 0.084 -0.115 9
-0.017 0.05 -0.089 8
0.023 0.062 -0.064 8
0.076 0.06 -0.051 9
0.068 0.054 -0.046 7
0.113 0.033 -0.025 10
0.121 0.027 0.007 8
0.097 0.032 0.054 8
0.09 0.021 0.115 9
0.106 -0.02 0.16 8
0.1 -0.052 0.179 9
0.09 -0.047 0.161 8
0.046 -0.029 0.161 8
0.004 0.016 0.137 9
-0.019 0.045 0.077 8
-0.039 0.056 0.0 8
-0.035 0.05 0.0 7
-0.062 0.065 -0.047 10
-0.095 0.09 -0.043 9
-0.109 0.093 -0.002 8
-0.098 0.061 0.056 8
-0.082 0.042 0.137 9
-0.07 0.043 0.214 8
-0.051 0.026 0.25 9
-0.046 0.023 0.225 8
-0.016 -0.007 0.218 8
0.0 -0.012 0.172 9
-0.022 0.026 0.106 8
-0.069 0.082 0.027 7
-0.116 0.117 -0.058 10
-0.17 0.137 -0.141 8
-0.153 0.123 -0.127 9
-0.219 0.158 -0.187 8
-0.285 0.194 -0.208 9
-0.337 0.225 -0.195 8
-0.383 0.264 -0.145 8
-0.438 0.291 -0.088 9
-0.481 0.298 -0.059 8
-0.433 0.268 -0.053 9
-0.445 0.283 -0.036 8
-0.417 0.289 -0.032 7
-0.375 0.262 -0.046 10
-0.355 0.204 -0.06 8
-0.359 0.117 -0.072 9
-0.323 0.105 -0.065 8
-0.368 -0.011 -0.076 8
-0.417 -0.169 -0.1 9
-0.457 -0.333 -0.168 8
-0.558 -0.442 -0.287 9
-0.697 -0.49 -0.428 8
-0.757 -0.496 -0.533 8
-0.682 -0.446 -0.48 9
-0.619 -0.45 -0.56 6
-0.462 -0.462 -0.685 10
-0.293 -0.464 -0.805 9
-0.155 -0.42 -0.914 8
-0.065 -0.326 -1.049 9
-0.017 -0.245 -1.13 8
-0.016 -0.22 -1.017 8
0.005 -0.182 -1.018 9
0.166 -0.206 -0.973 8
0.028 -0.23 -0.937 9
-0.494 -0.105 -0.87 8
-0.83 0.056 -0.653 8
-0.747 0.051 -0.587 7
-0.728 -0.009 -0.282 10
-0.209 -0.188 0.024 9
0.583 -0.726 -0.061 8
1.064 -1.265 -0.539 8
1.127 -1.229 -1.006 9
1.035 -1.025 -1.395 8
0.931 -0.922 -1.255 8
0.753 -0.811 -1.507 9
0.494 -0.804 -1.584 8
0.183 -0.859 -1.482 9
-0.052 -0.954 -1.272 8
-0.135 -1.038 -1.061 7
-0.12 -1.12 -0.989 10
-0.108 -1.008 -0.89 8
-0.109 -1.226 -0.992 9
-0.154 -1.531 -1.136 8
-0.199 -1.8 -1.375 8
-0.219 -2.066 -1.723 9
-0.208 -2.247 -2.075 8
-0.038 -2.264 -2.336 9
-0.034 -2.038 -2.102 8
0.303 -2.006 -2.247 8
0.543 -1.884 -2.357 9
0.574 -1.671 -2.389 6
0.501 -1.454 -2.242 11
0.375 -1.302 -1.974 8
0.185 -1.292 -1.631 8
0.167 -1.162 -1.468 9
-0.209 -0.89 -0.953 8
-0.812 -0.235 -0.32 9
-1.336 0.245 0.209 8
-1.465 0.553 0.536 8
-1.1 0.859 0.821 9
-0.99 1.042 1.473 8
-0.891 0.937 1.326 8
0.549 1.007 2.485 7
1.258 1.135 3.579 10
1.768 1.294 3.904 9
2.181 1.343 3.504 8
2.492 1.362 2.88 8
2.242 1.226 2.592 9
2.487 1.44 2.056 8
2.597 2.062 1.491 9
2.15 2.523 0.884 8
1.46 2.351 0.796 8
0.974 2.257 1.41 9
0.535 2.412 2.116 8
0.481 2.171 1.904 7
0.217 2.385 2.371 10
0.276 2.658 2.738 8
0.609 2.944 2.964 9
1.253 3.117 2.938 8
2.113 3.266 2.963 9
2.809 3.535 3.294 8
2.528 3.182 2.965 8
2.917 3.337 3.776 9
2.905 3.425 4.855 8
2.564 3.593 5.867 8
2.251 3.706 6.484 9
2.162 3.836 6.316 7
2.22 3.812 5.325 10
1.998 3.431 4.793 8
2.046 3.16 3.473 8
1.738 2.894 2.349 9
1.32 2.097 1.601 8
0.718 1.053 1.287 9
-0.286 0.458 1.337 8
-1.112 -0.042 1.307 8
-1.001 -0.038 1.176 9
-1.417 -0.288 0.864 8
-1.469 -0.254 0.285 9
-1.237 -0.183 -0.522 6
-0.97 -0.124 -1.37 10
-0.872 -0.173 -2.198 9
-0.784 -0.156 -1.978 8
-0.874 -0.459 -2.769 9
-1.224 -0.778 -3.211 8
-1.343 -0.979 -3.232 8
-0.661 -1.255 -3.034 9
0.484 -1.49 -2.772 8
1.543 -1.501 -2.588 9
1.388 -1.351 -2.329 8
2.069 -1.221 -2.29 8
2.46 -1.124 -2.28 7
2.63 -1.219 -2.314 10
2.348 -1.284 -2.513 8
1.791 -1.162 -2.928 9
1.252 -0.997 -3.468 8
1.127 -0.897 -3.121 9
0.684 -0.862 -3.691 8
0.323 -0.984 -4.118 8
0.135 -1.104 -4.082 9
0.285 -1.212 -3.255 8
0.688 -1.34 -1.863 9
0.894 -1.152 -0.5 8
0.804 -1.037 -0.45 7
0.92 -1.185 0.62 10
1.228 -1.99 1.06 8
1.534 -2.677 0.867 9
1.702 -3.406 0.338 8
1.167 -3.758 -0.531 8
1.05 -3.382 -1.285 9
-0.343 -3.044 -1.156 8
-1.49 -1.82 -1.609 9
-1.535 -1.31 -1.66 8
-0.509 -1.013 -0.966 8
0.684 -0.459 0.205 9
0.616 -0.413 0.185 6
1.243 0.026 1.282 11
1.444 -0.306 1.838 8
1.277 -1.032 1.881 8
0.383 -1.331 1.798 9
-1.122 -1.022 1.71 8
-2.525 -0.664 1.353 9
-3.533 -0.249 0.586 8
-3.179 -0.224 0.527 8
-3.795 0.086 -0.397 9
-3.295 0.601 -0.493 8
-1.864 1.427 0.155 8
-0.904 2.127 0.381 7
-0.388 2.304 0.247 10
-0.07 1.624 0.065 9
-0.063 1.462 0.058 8
-0.173 0.569 -0.037 8
-0.543 0.184 0.119 9
-0.974 0.321 0.37 8
-1.261 0.616 0.502 9
-0.998 1.282 0.875 8
-0.458 1.826 1.402 8
-0.412 1.643 1.261 9
-0.082 1.309 1.426 8
0.047 0.35 1.347 7
-0.181 -0.706 1.206 10
-0.709 -1.368 1.143 8
-1.127 -1.558 1.362 9
-1.517 -1.31 1.543 8
-1.365 -1.179 1.389 8
-1.668 -0.571 1.246 9
-1.69 0.086 1.122 8
-1.681 0.51 1.071 9
-1.393 0.562 0.757 8
-0.776 0.249 0.293 8
-0.698 0.224 0.263 9
-0.067 -0.142 -0.121 7
0.419 -0.353 -0.431 10
0.783 -0.564 -0.652 8
1.004 -0.86 -0.725 8
0.992 -1.089 -0.709 9
0.737 -1.156 -0.664 8
0.664 -1.041 -0.597 9
0.301 -1.025 -0.542 8
0.015 -0.981 -0.486 8
-0.173 -0.944 -0.451 9
-0.346 -0.913 -0.439 8
-0.534 -0.871 -0.41 9
-0.481 -0.784 -0.369 6
-0.618 -0.716 -0.329 10
-0.596 -0.616 -0.341 9
-0.431 -0.504 -0.438 8
-0.182 -0.401 -0.652 9
0.156 -0.219 -0.873 8
0.593 -0.009 -0.893 8
0.931 0.104 -0.902 9
0.838 0.093 -0.811 8
0.906 0.185 -0.909 8
0.712 0.239 -0.83 9
0.349 0.227 -0.495 8
-0.004 0.235 -0.222 7
-0.233 0.274 -0.169 10
-0.29 0.362 -0.141 8
-0.261 0.326 -0.127 9
-0.139 0.457 -0.066 8
0.139 0.578 0.071 9
0.425 0.677 0.214 8
0.54 0.655 0.277 8
0.402 0.538 0.344 9
0.362 0.484 0.309 8
0.041 0.394 0.423 9
-0.282 0.347 0.475 8
-0.474 0.311 0.409 7
-0.474 0.3 0.283 10
-0.269 0.342 0.11 8
0.114 0.401 -0.05 9
0.102 0.361 -0.045 8
0.435 0.383 -0.033 8
0.501 0.287 0.102 9
0.319 0.126 0.229 8
0.032 -0.038 0.376 9
-0.218 -0.265 0.573 8
-0.372 -0.543 0.761 8
-0.335 -0.488 0.685 9
-0.386 -0.706 0.745 6
-0.354 -0.804 0.579 10
-0.289 -0.838 0.269 9
-0.27 -0.835 0.029 8
-0.293 -0.821 -0.008 9
-0.295 -0.908 0.157 8
-0.265 -0.817 0.141 8
-0.194 -1.008 0.445 9
0.046 -1.194 0.813 8
0.467 -1.411 1.147 9
0.957 -1.636 1.323 8
1.321 -1.509 1.315 8
1.189 -1.358 1.183 7
1.381 -1.257 0.859 10
1.554 -1.42 0.263 9
1.648 -1.402 -0.186 8
1.572 -1.14 -0.375 8
1.535 -0.867 -0.521 9
1.667 -0.774 -0.859 8
1.5 -0.696 -0.773 9
1.728 -0.656 -1.215 8
1.861 -0.62 -1.467 8
1.807 -0.684 -1.52 9
1.552 -0.795 -1.473 8
1.136 -0.799 -1.343 7
0.592 -0.699 -1.131 10
0.533 -0.629 -1.018 8
-0.015 -0.508 -0.764 9
-0.412 -0.341 -0.472 8
-0.56 -0.106 -0.161 8
-0.412 0.118 0.105 9
-0.037 0.251 0.311 8
0.311 0.309 0.334 9
0.28 0.278 0.3 8
0.762 0.42 0.22 8
1.279 0.562 -0.001 9
1.265 0.58 -0.551 7
0.861 0.527 -1.208 10
0.384 0.345 -1.74 8
0.024 0.032 -2.004 8
0.021 0.028 -1.803 9
-0.14 -0.198 -1.711 8
-0.161 -0.15 -1.376 9
-0.102 0.039 -0.954 8
-0.051 0.072 -0.47 8
-0.239 -0.193 -0.174 9
-0.215 -0.174 -0.156 8
-0.625 -0.479 -0.084 9
-1.093 -0.605 0.024 6
-1.559 -0.619 0.212 10
-1.806 -0.49 0.452 9
-1.658 -0.19 0.621 8
-1.21 0.039 0.665 8
-1.089 0.035 0.599 9
-0.597 0.046 0.626 8
-0.347 -0.032 0.623 9
-0.484 -0.048 0.595 8
-0.858 0.144 0.655 8
-1.072 0.434 0.749 9
-0.861 0.592 0.766 8
-0.775 0.533 0.689 7
-0.315 0.561 0.763 10
0.154 0.549 1.052 8
0.525 0.544 1.418 9
0.819 0.571 1.588 8
1.003 0.687 1.568 9
0.951 0.894 1.561 8
0.856 0.805 1.405 8
0.553 1.076 1.483 9
0.003 1.361 1.544 8
-0.694 1.581 1.562 9
-1.241 1.773 1.517 8
-1.116 1.596 1.365 7
-1.343 1.787 1.275 10
-1.116 1.608 1.147 8
-0.525 2.028 1.033 8
0.032 2.085 1.055 9
0.281 2.152 1.217 8
0.185 2.128 1.427 9
-0.118 1.949 1.698 8
-0.106 1.754 1.528 8
-0.407 1.505 1.795 9
-0.404 1.218 1.881 8
-0.025 0.952 1.821 9
0.561 0.75 1.709 6
1.138 0.542 1.777 10
1.441 0.256 2.098 9
1.297 0.231 1.888 8
1.188 -0.121 2.348 9
0.777 -0.432 2.783 8
0.285 -0.697 3.064 8
-0.096 -0.879 3.133 9
-0.102 -0.853 2.951 8
0.389 -0.708 2.468 9
0.35 -0.637 2.221 8
1.146 -0.488 1.485 8
1.784 -0.381 0.588 7
2.021 -0.36 -0.305 10
1.853 -0.441 -1.065 9
1.231 -0.591 -1.577 8
0.359 -0.717 -1.735 8
0.323 -0.645 -1.562 9
-0.437 -0.645 -1.34 8
-0.909 -0.598 -0.883 8
-1.054 -0.63 -0.502 9
-0.98 -0.612 -0.237 8
-0.809 -0.517 -0.135 9
-0.728 -0.465 -0.121 8
-0.581 -0.396 -0.277 7
-0.629 -0.38 -0.661 10
-0.838 -0.425 -1.185 8
-1.181 -0.473 -1.714 9
-1.77 -0.47 -2.154 8
-2.61 -0.364 -2.402 8
-2.349 -0.327 -2.161 9
-2.958 -0.305 -2.184 8
-2.915 -0.744 -2.268 9
-2.96 -0.844 -2.484 8
-3.367 0.213 -2.178 8
-3.551 1.8 -1.406 9
-3.196 1.62 -1.266 6
-2.415 2.388 -0.804 11
-0.862 1.574 -0.994 8
0.149 0.337 -1.317 8
0.056 -0.341 -1.062 9
-0.84 -0.768 -0.494 8
-2.024 -1.086 -0.025 9
-2.86 -1.188 0.371 8
-2.574 -1.069 0.334 8
-2.97 -0.968 0.484 9
-2.99 -0.559 0.353 8
-2.056 -0.253 0.132 8
-0.757 -0.302 -0.651 7
0.264 -0.334 -1.724 10
0.237 -0.301 -2.424 9
0.969 -0.27 -2.182 8
1.144 -0.097 -2.882 8
0.869 -0.043 -3.668 9
0.132 -0.307 -4.179 8
-0.805 -0.612 -4.144 9
-1.584 -0.694 -3.537 8
-1.426 -0.625 -3.183 8
-1.632 -0.418 -2.172 9
-1.088 -0.237 -1.424 8
-0.258 -0.236 -1.238 7
0.558 -0.176 -1.081 10
1.254 -0.118 -0.764 8
1.589 -0.266 -0.558 9
1.43 -0.239 -0.502 8
1.193 -0.432 -0.513 9
0.638 -0.539 -0.55 8
0.195 -0.708 -0.766 8
0.088 -0.913 -1.163 9
0.262 -1.145 -1.462 8
0.39 -1.374 -1.569 8
0.351 -1.237 -1.412 9
0.301 -1.608 -1.472 7
0.175 -2.121 -1.576 10
-0.068 -2.2 -1.594 8
-0.501 -1.558 -1.18 8
-0.964 -0.28 -0.363 9
-0.868 -0.252 0.243 8
-1.248 1.107 0.218 9
-1.603 1.824 0.431 8
-1.31 1.506 0.525 8
-0.196 0.626 0.568 9
0.767 -0.125 0.637 8
1.137 -0.77 0.984 9
1.023 -0.693 0.886 6
0.755 -1.005 1.266 10
0.068 -0.94 1.332 9
-0.526 -0.822 1.083 8
-0.847 -0.72 0.538 9
-0.788 -0.551 0.081 8
-0.616 -0.076 -0.312 8
-0.555 -0.069 -0.281 9
-0.481 0.571 -0.664 8
-0.267 0.992 -0.743 9
0.022 1.165 -0.57 8
0.21 1.245 -0.477 8
0.233 1.237 -0.704 7
0.173 1.14 -0.894 10
0.156 1.026 -0.805 8
0.022 1.038 -0.697 9
-0.21 1.236 -0.514 8
-0.5 1.63 -0.505 9
-0.807 2.057 -0.507 8
-0.961 2.321 -0.196 8
-0.931 2.39 0.225 9
-0.837 2.151 0.202 8
-0.773 2.091 0.432 9
-0.633 1.917 0.514 8
-0.372 1.682 0.713 7
-0.067 1.45 1.034 10
0.256 1.262 1.279 8
0.231 1.136 1.151 9
0.509 0.986 1.381 8
0.667 0.816 1.506 8
0.748 0.624 1.503 9
0.758 0.435 1.47 8
0.699 0.244 1.43 9
0.605 0.031 1.417 8
0.545 0.028 1.275 8
0.475 -0.174 1.268 9
0.416 -0.235 1.206 6
0.339 -0.141 1.087 11
0.287 -0.108 0.863 8
0.255 -0.191 0.615 8
0.132 -0.169 0.472 9
0.118 -0.152 0.425 8
-0.001 -0.15 0.363 8
-0.005 -0.27 0.285 9
0.029 -0.359 0.185 8
0.073 -0.383 0.148 9
0.071 -0.312 0.184 8
0.045 -0.238 0.212 8
0.04 -0.214 0.191 7
0.036 -0.193 0.167 10
0.02 -0.179 0.147 9
0.001 -0.157 0.142 8
0.035 -0.13 0.162 8
0.116 -0.098 0.254 9
0.104 -0.088 0.228 8
0.045 0.136 0.36 9
0.007 0.177 0.365 8
0.22 -0.346 0.424 8
0.181 -0.484 0.59 9
-0.194 -0.11 0.648 8
-0.175 -0.099 0.583 7
-0.343 0.023 0.484 10
-0.275 0.038 0.238 8
-0.155 0.156 -0.052 9
-0.038 0.268 -0.312 8
0.012 0.332 -0.346 8
-0.005 0.345 -0.165 9
-0.063 0.261 0.017 8
-0.056 0.235 0.016 9
-0.148 0.108 0.12 8
-0.231 0.023 0.13 8
-0.235 -0.02 0.033 9
-0.21 0.01 -0.151 7
-0.21 0.107 -0.369 10
-0.183 0.162 -0.54 8
-0.165 0.146 -0.486 8
-0.108 0.165 -0.597 9
-0.053 0.21 -0.69 8
-0.033 0.268 -0.812 9
-0.082 0.288 -0.922 8
-0.114 0.191 -0.877 8
-0.102 0.172 -0.79 9
-0.101 0.027 -0.605 8
-0.182 0.063 -0.239 9
-0.149 0.03 0.258 6
0.089 -0.181 0.591 10
0.345 -0.302 0.751 9
0.416 -0.319 0.776 8
0.375 -0.287 0.699 9
0.258 -0.262 0.677 8
0.068 -0.244 0.655 8
-0.172 -0.225 0.545 9
-0.303 -0.195 0.416 8
-0.313 -0.152 0.316 8
-0.345 -0.134 0.078 9
-0.311 -0.12 0.07 8
-0.245 -0.103 -0.18 7
-0.15 -0.038 -0.286 10
-0.161 0.046 -0.331 8
-0.167 0.088 -0.289 9
-0.074 0.072 -0.2 8
-0.076 0.159 -0.264 9
-0.068 0.143 -0.238 8
-0.124 0.29 -0.137 8
-0.151 0.188 0.087 9
-0.221 0.01 0.16 8
-0.227 0.017 0.286 9
-0.19 0.034 0.292 8
-0.171 0.03 0.263 7
-0.137 -0.03 0.112 10
-0.14 -0.01 -0.053 8
-0.151 0.088 -0.246 9
-0.127 0.115 -0.443 8
0.018 0.13 -0.525 8
0.111 0.249 -0.598 9
0.039 0.402 -0.615 8
0.035 0.361 -0.554 8
0.004 0.386 -0.34 9
-0.015 0.287 -0.13 8
-0.077 0.214 -0.025 9
-0.111 0.2 0.03 6
-0.118 0.198 -0.005 10
-0.106 0.178 -0.005 9
-0.105 0.144 -0.064 8
-0.104 0.052 -0.123 9
-0.039 -0.079 -0.093 8
0.005 -0.124 -0.207 8
-0.037 -0.051 -0.426 9
-0.063 0.007 -0.404 8
-0.057 0.006 -0.364 9
-0.067 0.015 -0.282 8
-0.074 0.019 -0.234 8
-0.088 -0.032 -0.172 7
-0.144 -0.181 -0.054 10
-0.231 -0.325 0.169 9
-0.277 -0.385 0.459 8
-0.249 -0.346 0.413 8
-0.21 -0.353 0.605 9
-0.105 -0.304 0.731 8
-0.005 -0.175 0.718 9
0.152 -0.104 0.545 8
0.234 -0.123 0.424 8
0.145 -0.045 0.394 9
0.131 -0.04 0.355 8
0.061 0.081 0.376 7
0.094 0.174 0.375 10
0.215 0.256 0.364 8
0.295 0.24 0.382 9
0.219 0.06 0.475 8
0.197 -0.135 0.613 8
0.031 -0.121 0.552 9
-0.111 -0.206 0.605 8
-0.219 -0.234 0.499 9
-0.237 -0.233 0.294 8
-0.166 -0.205 0.013 8
-0.083 -0.141 -0.344 9
-0.075 -0.127 -0.31 7
-0.011 0.006 -0.625 10
# end
#Thu Feb 26 20:40:28 GMT+08:00 20151
