# Supplementary material for: Abnormal Gait Behavior Detection for Elderly Based on Enhanced Wigner-Ville Analysis and Cloud Incremental SVM Learning
Source: Hindawi journal article supplement (doi:10.1155/2016/5869238), 2016-01-01
Supplement: f1 [file 5869238.f1.zip › Supplementary Materials/Original Data/Leftward fall With recovery/original__142.txt]

# Accelerometer Values
# filename:  original__142.txt
# Saving start time: Thu Feb 26 20:41:57 GMT+08:00 2015

# sensor resolution: 0.0095825195m/s^2
#Sensorvendor: KIONIX, name: KX023 Accelerometer, type: 1,version : 1, range 39.240005

# X value, Y value, Z value, time diff in ms
0.2 -0.395 0.395 8
0.237 -0.333 0.228 9
0.272 -0.222 0.007 8
0.268 -0.061 -0.165 9
0.21 0.092 -0.291 8
0.189 0.083 -0.262 7
0.099 0.181 -0.307 10
0.012 0.23 -0.309 8
-0.062 0.26 -0.327 9
-0.119 0.277 -0.285 8
-0.152 0.272 -0.194 8
-0.139 0.231 -0.108 9
-0.125 0.208 -0.097 8
-0.054 0.124 -0.041 9
0.068 0.018 -0.019 8
0.208 -0.087 -0.034 8
0.333 -0.191 -0.069 9
0.416 -0.252 -0.106 6
0.452 -0.28 -0.102 10
0.407 -0.252 -0.092 9
0.391 -0.258 -0.037 8
0.276 -0.208 0.006 9
0.152 -0.18 0.042 8
0.098 -0.192 0.071 8
0.101 -0.231 0.075 9
0.091 -0.329 0.056 8
0.082 -0.296 0.05 9
0.202 -0.374 -0.022 8
0.213 -0.348 -0.152 8
0.235 -0.279 -0.314 7
0.35 -0.224 -0.43 10
0.509 -0.237 -0.532 9
0.458 -0.213 -0.479 8
0.609 -0.272 -0.603 8
0.666 -0.318 -0.654 9
0.559 -0.381 -0.636 8
0.373 -0.426 -0.546 9
0.187 -0.452 -0.399 8
0.041 -0.561 -0.243 8
0.037 -0.505 -0.218 9
0.008 -0.74 -0.124 8
0.068 -0.976 -0.118 7
0.154 -1.097 -0.143 10
0.228 -1.111 -0.205 8
0.216 -1.057 -0.298 9
0.135 -0.966 -0.362 8
0.121 -0.87 -0.325 8
0.008 -0.783 -0.34 9
-0.133 -0.703 -0.321 8
-0.229 -0.636 -0.307 9
-0.274 -0.578 -0.318 8
-0.344 -0.52 -0.337 8
-0.387 -0.473 -0.379 9
-0.349 -0.426 -0.341 7
-0.298 -0.428 -0.436 10
-0.163 -0.483 -0.599 8
-0.044 -0.551 -0.758 8
-0.003 -0.599 -0.872 9
0.05 -0.666 -1.098 8
0.045 -0.6 -0.988 9
0.121 -0.706 -1.294 8
0.163 -0.808 -1.469 8
0.095 -0.906 -1.521 9
-0.159 -0.937 -1.473 8
-0.466 -0.947 -1.308 9
-0.419 -0.852 -1.177 6
-0.564 -0.981 -1.042 10
-0.542 -1.16 -1.052 9
-0.452 -1.258 -1.119 8
-0.31 -1.252 -1.167 9
-0.066 -1.199 -1.272 8
0.19 -1.143 -1.369 8
0.342 -1.07 -1.467 9
0.308 -0.963 -1.32 8
0.333 -0.862 -1.358 8
0.222 -0.738 -1.122 9
0.083 -0.608 -0.648 8
-0.047 -0.441 -0.181 7
-0.224 -0.141 0.229 10
-0.202 -0.127 0.206 8
-0.462 0.218 0.779 9
-0.814 0.443 1.527 8
-1.183 0.555 2.389 9
-1.543 0.621 3.137 8
-1.783 0.647 3.471 8
-1.741 0.58 3.262 9
-1.567 0.522 2.936 8
-1.296 0.414 2.317 9
-0.939 0.365 1.501 8
-0.66 0.486 0.851 7
-0.556 0.67 0.694 10
-0.777 0.722 1.182 8
-1.293 0.633 2.164 9
-1.164 0.569 1.948 8
-1.719 0.361 3.012 8
-2.007 0.121 3.78 9
-1.874 -0.107 4.024 8
-1.373 -0.202 3.751 8
-0.859 0.034 3.183 9
-0.676 0.523 2.578 8
-0.608 0.471 2.32 9
-0.792 1.1 1.937 6
-1.116 1.667 1.905 10
-1.322 1.814 2.204 9
-1.283 1.547 2.577 8
-1.061 1.049 2.828 9
-0.955 0.944 2.545 8
-0.722 0.459 2.824 8
-0.588 0.321 3.162 9
-0.755 0.635 3.408 8
-1.245 1.246 3.515 9
-1.872 1.883 3.434 8
-2.26 2.283 3.061 8
-2.034 2.055 2.754 7
-1.825 1.989 2.066 10
-1.152 1.454 1.183 9
-0.367 0.627 0.451 8
0.432 -0.235 0.066 8
0.962 -0.692 -0.046 9
0.595 -0.706 0.25 8
0.535 -0.635 0.225 9
-0.721 -0.693 1.171 8
-2.243 -0.978 2.583 8
-3.468 -1.28 3.986 9
-3.981 -1.456 4.748 8
-3.846 -1.444 4.303 7
-3.185 -1.154 2.543 10
-2.867 -1.039 2.289 8
-1.856 -0.638 -0.114 9
-0.792 -0.316 -2.321 8
0.031 -0.143 -3.863 8
0.336 -0.286 -4.29 9
0.24 -0.959 -3.588 8
0.108 -2.019 -2.47 9
0.097 -1.817 -2.223 8
-0.009 -2.812 -1.207 8
-0.152 -3.416 -0.462 9
-0.209 -3.526 -0.3 7
-0.055 -3.217 -0.922 10
0.267 -2.531 -2.117 8
0.24 -2.278 -1.905 8
0.597 -1.332 -3.313 9
0.92 -0.389 -4.58 8
1.097 0.369 -5.364 9
0.902 0.921 -5.215 8
0.291 1.2 -4.08 8
-0.342 1.144 -2.693 9
-0.308 1.03 -2.423 8
-0.547 0.704 -1.465 8
-0.247 0.297 -1.076 7
0.458 -0.004 -1.41 10
1.165 -0.08 -2.294 9
1.545 0.157 -3.215 8
1.399 0.568 -3.768 8
1.259 0.511 -3.391 9
0.613 0.946 -3.142 8
-0.247 1.156 -2.195 9
-0.974 0.984 -0.985 8
-1.354 0.609 0.309 8
-1.287 0.14 1.177 9
-1.159 -0.285 1.256 8
-0.593 -0.256 1.13 7
0.208 -0.378 0.547 10
0.728 -0.217 -0.3 8
0.604 0.141 -0.829 9
0.151 0.575 -0.852 8
-0.215 0.708 -0.704 9
-0.194 0.637 -0.633 8
-0.359 0.439 -0.438 8
-0.257 0.026 -0.12 9
-0.087 -0.474 0.323 8
0.004 -0.834 0.908 8
0.113 -1.054 1.41 9
0.102 -0.949 1.269 7
0.235 -1.027 1.453 10
0.112 -0.898 1.347 8
-0.373 -0.658 1.216 9
-0.914 -0.385 1.189 8
-1.349 -0.154 1.203 8
-1.665 -0.102 1.357 9
-1.708 -0.217 1.556 8
-1.537 -0.195 1.4 8
-1.337 -0.322 1.446 9
-1.004 -0.354 1.218 8
-0.675 -0.282 0.779 9
-0.462 -0.099 0.305 6
-0.448 0.183 0.02 10
-0.55 0.425 -0.114 9
-0.495 0.383 -0.102 8
-0.522 0.414 -0.296 9
-0.462 0.267 -0.479 8
-0.374 0.029 -0.557 8
-0.248 -0.212 -0.491 9
-0.108 -0.391 -0.349 8
-0.097 -0.352 -0.314 9
0.083 -0.497 -0.268 8
0.356 -0.559 -0.33 8
0.664 -0.522 -0.424 7
0.771 -0.428 -0.544 10
0.631 -0.309 -0.617 9
0.468 -0.228 -0.537 8
0.421 -0.205 -0.483 8
0.357 -0.249 -0.272 9
0.354 -0.395 0.031 8
0.31 -0.503 0.354 8
0.243 -0.507 0.595 9
0.218 -0.421 0.691 8
0.166 -0.24 0.546 9
0.149 -0.216 0.491 8
0.059 -0.021 0.148 7
-0.019 0.142 -0.194 10
-0.039 0.31 -0.418 8
0.071 0.382 -0.571 9
0.312 0.326 -0.709 8
0.524 0.207 -0.736 8
0.471 0.186 -0.662 9
0.633 0.063 -0.566 8
0.709 -0.032 -0.405 9
0.62 -0.09 -0.233 8
0.507 -0.089 -0.145 8
0.428 -0.047 -0.157 9
0.385 -0.043 -0.141 6
0.319 0.017 -0.128 11
0.267 0.071 -0.028 8
0.246 0.12 0.113 8
0.303 0.186 0.188 9
0.496 0.224 0.142 8
0.761 0.275 0.081 8
0.685 0.247 0.073 9
0.859 0.338 0.051 8
0.881 0.495 0.074 9
0.854 0.722 0.098 8
0.853 0.904 0.03 8
0.966 1.055 -0.109 7
1.142 1.168 -0.19 10
1.028 1.051 -0.171 9
1.125 1.129 -0.107 8
1.13 1.176 0.067 8
1.097 1.125 0.243 9
1.069 1.001 0.363 8
1.12 0.89 0.32 9
1.306 0.792 0.153 8
1.175 0.713 0.137 8
1.411 0.555 0.089 9
1.471 0.312 0.409 8
1.35 0.086 1.019 7
1.245 -0.034 1.588 10
1.175 0.011 2.016 8
1.058 0.01 1.815 9
0.853 0.201 2.089 8
0.615 0.438 2.078 8
0.497 0.591 1.716 9
0.42 0.695 1.214 8
0.39 0.781 0.981 9
0.448 0.703 1.241 8
0.403 0.633 1.117 8
0.486 0.425 1.668 9
0.466 0.255 2.307 7
0.275 0.204 2.843 10
-0.051 0.303 2.855 8
-0.36 0.597 2.262 8
-0.695 0.975 1.533 9
-0.625 0.877 1.38 8
-1.042 1.262 1.048 9
-1.324 1.482 1.211 8
-1.287 1.301 1.497 8
-0.939 0.982 1.551 9
-0.54 0.853 1.344 8
-0.31 0.934 0.938 9
-0.279 0.84 0.844 6
-0.14 1.002 0.32 10
-0.025 1.079 -0.348 9
-0.255 1.127 -0.729 8
-0.976 1.225 -0.081 9
-1.535 1.111 1.05 8
-1.381 1.0 0.945 8
-1.206 0.527 1.565 9
-0.514 0.01 1.521 8
0.15 -0.277 1.136 8
0.549 -0.399 0.595 9
0.868 -0.434 -0.04 8
0.781 -0.391 -0.036 7
1.167 -0.469 -0.667 10
1.623 -0.699 -1.278 8
1.994 -0.95 -1.75 9
1.948 -1.097 -1.819 8
1.516 -1.073 -1.338 9
1.155 -0.999 -0.985 8
1.248 -1.1 -1.253 8
1.123 -0.99 -1.127 9
1.514 -1.152 -1.778 8
1.865 -1.12 -2.465 9
2.11 -0.975 -2.984 8
2.343 -0.905 -3.356 7
2.602 -0.903 -3.64 10
2.609 -0.803 -3.605 8
2.348 -0.722 -3.245 9
1.956 -0.459 -2.68 8
1.324 -0.172 -1.932 8
0.647 0.085 -1.392 9
0.137 0.322 -1.108 8
-0.106 0.418 -1.135 8
-0.095 0.376 -1.021 9
-0.185 0.308 -0.919 8
-0.22 0.173 -0.921 9
0.014 0.023 -1.001 6
0.616 -0.108 -1.386 10
0.802 -0.281 -1.226 9
0.647 -0.516 -0.611 8
0.582 -0.464 -0.549 9
0.539 -0.628 -0.166 8
0.521 -0.737 -0.234 8
0.55 -0.844 -0.428 9
0.52 -0.789 -0.781 8
0.493 -0.622 -1.18 9
0.601 -0.517 -1.635 8
0.54 -0.465 -1.472 8
0.771 -0.429 -1.83 7
0.926 -0.43 -1.912 10
0.985 -0.545 -1.684 9
0.963 -0.664 -1.327 8
0.862 -0.565 -1.067 8
0.772 -0.385 -1.055 9
0.695 -0.347 -0.95 8
0.629 -0.263 -1.126 9
0.461 -0.219 -1.215 8
0.187 -0.159 -1.021 8
-0.017 -0.127 -0.723 9
-0.061 -0.215 -0.527 8
-0.055 -0.193 -0.474 7
0.046 -0.374 -0.494 10
0.197 -0.479 -0.642 8
0.22 -0.45 -0.626 9
0.129 -0.307 -0.475 8
0.112 -0.097 -0.448 8
0.219 0.075 -0.586 9
0.197 0.067 -0.528 8
0.338 0.203 -0.702 9
0.424 0.355 -0.859 8
0.423 0.49 -0.991 8
0.359 0.567 -1.015 9
0.242 0.605 -0.812 6
0.102 0.621 -0.448 11
0.091 0.559 -0.403 8
0.023 0.549 -0.092 8
0.054 0.51 0.058 9
0.147 0.462 0.028 8
0.271 0.44 -0.088 9
0.33 0.478 -0.188 8
0.287 0.603 -0.212 8
0.258 0.543 -0.191 9
0.186 0.705 -0.163 8
0.141 0.792 -0.133 9
0.147 0.784 -0.104 6
0.187 0.72 -0.015 10
0.208 0.642 0.184 9
0.187 0.578 0.165 8
0.185 0.515 0.358 8
0.182 0.521 0.394 9
0.264 0.448 0.416 8
0.395 0.293 0.7 9
0.447 0.244 1.21 8
0.351 0.361 1.639 8
0.316 0.324 1.475 9
0.152 0.528 1.661 8
0.048 0.666 1.616 7
0.027 0.778 1.396 10
0.119 0.917 1.058 8
0.223 1.032 0.774 9
0.274 1.087 0.667 8
0.247 0.978 0.6 9
0.284 0.981 0.572 8
0.31 0.932 0.471 8
0.271 0.875 0.291 9
0.065 0.866 0.111 8
-0.265 0.902 0.05 9
-0.578 0.916 0.057 8
-0.52 0.824 0.051 7
-0.718 0.803 -0.062 10
-0.774 0.756 -0.307 8
-0.752 0.711 -0.54 8
-0.713 0.642 -0.651 9
-0.697 0.542 -0.626 8
-0.627 0.488 -0.563 9
-0.661 0.381 -0.385 8
-0.68 0.253 -0.101 8
-0.641 0.074 0.158 9
-0.558 -0.112 0.325 8
-0.487 -0.238 0.418 9
-0.438 -0.214 0.376 6
-0.471 -0.227 0.524 10
-0.586 -0.101 0.75 9
-0.73 0.051 0.886 8
-0.74 0.12 0.894 9
-0.543 0.014 0.761 8
-0.248 -0.165 0.547 8
-0.004 -0.254 0.369 9
-0.003 -0.228 0.332 8
0.099 -0.227 0.253 9
0.108 -0.159 0.313 8
0.081 -0.079 0.42 8
0.027 0.002 0.498 7
-0.056 0.126 0.53 10
-0.051 0.113 0.477 9
-0.126 0.246 0.402 8
-0.137 0.332 0.166 8
-0.112 0.362 -0.065 9
-0.122 0.365 -0.158 8
-0.145 0.37 -0.21 8
-0.115 0.325 -0.262 9
-0.103 0.292 -0.236 8
-0.065 0.229 -0.233 9
-0.099 0.212 -0.113 8
-0.174 0.239 0.076 7
-0.213 0.257 0.107 10
-0.177 0.236 -0.043 8
-0.11 0.197 -0.18 9
-0.099 0.177 -0.162 8
-0.027 0.131 -0.218 8
0.076 0.073 -0.221 9
0.19 0.015 -0.205 8
0.269 -0.036 -0.187 9
0.308 -0.076 -0.168 8
0.277 -0.059 -0.138 8
0.249 -0.053 -0.124 9
0.085 0.039 -0.099 6
-0.131 0.168 -0.079 11
-0.363 0.333 -0.099 8
-0.468 0.431 -0.231 8
-0.363 0.36 -0.298 9
-0.327 0.324 -0.268 8
-0.172 0.185 -0.179 9
-0.087 0.096 -0.091 8
-0.041 0.056 -0.055 8
0.004 0.031 -0.101 9
0.067 0.011 -0.204 8
0.155 -0.014 -0.27 8
0.14 -0.012 -0.243 7
0.201 -0.037 -0.312 10
0.224 -0.064 -0.346 9
0.211 -0.061 -0.24 8
0.148 -0.025 -0.115 8
0.124 0.002 -0.01 9
0.137 0.035 0.089 8
0.123 0.031 0.08 9
0.201 0.023 0.108 8
0.343 -0.007 0.054 8
0.351 -0.001 -0.037 9
0.206 0.028 -0.086 8
0.185 0.025 -0.077 7
0.019 0.041 -0.049 10
-0.089 0.021 -0.044 8
-0.133 -0.021 0.134 9
-0.15 -0.061 0.209 8
-0.2 -0.036 0.593 9
-0.312 -0.049 1.079 8
# end
#Thu Feb 26 20:42:01 GMT+08:00 2015-
