# Supplementary material for: Abnormal Gait Behavior Detection for Elderly Based on Enhanced Wigner-Ville Analysis and Cloud Incremental SVM Learning
Source: Hindawi journal article supplement (doi:10.1155/2016/5869238), 2016-01-01
Supplement: f1 [file 5869238.f1.zip › Supplementary Materials/Original Data/Leftward fall With recovery/original__143.txt]

# Accelerometer Values
# filename:  original__143.txt
# Saving start time: Thu Feb 26 20:42:02 GMT+08:00 2015

# sensor resolution: 0.0095825195m/s^2
#Sensorvendor: KIONIX, name: KX023 Accelerometer, type: 1,version : 1, range 39.240005

# X value, Y value, Z value, time diff in ms
0.106 0.029 -0.395 8
0.021 0.104 -0.504 9
-0.067 0.178 -0.525 6
-0.108 0.221 -0.476 10
-0.105 0.223 -0.393 9
-0.094 0.201 -0.354 8
-0.06 0.177 -0.283 9
-0.02 0.141 -0.238 8
0.006 0.107 -0.182 8
0.03 0.073 -0.068 9
0.041 0.07 0.0 8
0.037 0.063 0.0 9
0.049 0.046 0.051 8
0.07 0.002 0.122 8
0.058 -0.008 0.142 7
0.019 -0.004 0.123 10
-0.026 -0.002 0.038 9
-0.065 0.0 -0.063 8
-0.058 0.0 -0.056 8
-0.061 0.0 -0.105 9
-0.038 -0.011 -0.073 8
-0.019 -0.029 0.018 8
-0.006 -0.039 0.102 9
-0.009 -0.038 0.15 8
-0.034 -0.03 0.176 9
-0.03 -0.027 0.158 8
-0.039 -0.026 0.161 7
-0.038 -0.032 0.145 10
-0.053 -0.027 0.125 8
-0.059 -0.016 0.111 9
-0.044 -0.006 0.092 8
-0.039 -0.006 0.083 8
0.005 -0.001 0.075 9
0.046 0.008 -0.141 8
0.091 -0.013 -0.251 9
0.141 -0.057 -0.229 8
0.142 -0.062 -0.101 8
0.077 -0.034 0.035 9
0.069 -0.031 0.032 6
0.01 -0.003 0.106 11
0.023 -0.007 0.131 8
0.069 -0.027 0.137 8
0.099 -0.033 0.148 9
0.106 -0.025 0.142 8
0.104 -0.015 0.107 8
0.093 -0.013 0.096 9
0.084 -0.001 0.064 8
0.078 0.003 0.046 9
0.09 -0.006 0.031 8
0.072 0.009 -0.012 8
0.064 0.008 -0.01 7
0.039 0.02 -0.02 10
0.06 -0.007 0.0 9
0.119 -0.03 -0.012 8
0.16 -0.039 -0.011 8
0.145 -0.031 0.01 9
0.11 -0.017 0.026 8
0.084 -0.004 0.008 9
0.075 -0.003 0.007 8
0.085 -0.002 -0.02 8
0.106 -0.014 -0.033 9
0.101 -0.02 -0.074 8
0.089 -0.02 -0.145 7
0.09 -0.021 -0.184 10
0.101 -0.013 -0.157 8
0.091 -0.012 -0.141 9
0.113 -0.013 -0.097 8
0.147 -0.015 -0.13 8
0.182 -0.012 -0.219 9
0.127 0.0 -0.24 8
0.071 -0.024 -0.132 9
0.064 -0.12 0.021 8
0.058 -0.108 0.018 8
0.198 -0.171 0.1 9
0.218 -0.147 0.094 7
0.205 -0.079 0.041 10
0.212 -0.014 -0.052 8
0.285 0.021 -0.179 8
0.256 0.019 -0.161 9
0.366 0.031 -0.264 8
0.445 0.009 -0.345 9
0.483 -0.072 -0.354 8
0.487 -0.182 -0.213 8
0.476 -0.334 0.008 9
0.491 -0.549 0.176 8
0.441 -0.494 0.159 9
0.507 -0.683 0.199 6
0.558 -0.759 0.081 10
0.598 -0.76 -0.155 9
0.55 -0.709 -0.41 8
0.337 -0.528 -0.571 9
0.125 -0.373 -0.612 8
0.112 -0.335 -0.551 8
-0.01 -0.361 -0.542 9
-0.034 -0.457 -0.521 8
0.028 -0.654 -0.539 8
0.133 -0.903 -0.538 9
0.2 -1.071 -0.468 8
0.18 -0.964 -0.421 7
0.213 -1.035 -0.343 10
0.328 -0.93 -0.281 8
0.539 -0.707 -0.297 9
0.712 -0.509 -0.442 8
0.804 -0.388 -0.64 9
0.835 -0.372 -0.795 8
0.752 -0.334 -0.715 8
0.673 -0.348 -0.747 9
0.51 -0.38 -0.597 8
0.394 -0.498 -0.412 9
0.374 -0.594 -0.382 8
0.421 -0.698 -0.475 7
0.448 -0.843 -0.548 10
0.403 -0.758 -0.493 8
0.353 -0.863 -0.487 9
0.223 -0.909 -0.423 8
0.066 -0.947 -0.366 8
-0.085 -0.99 -0.361 9
-0.334 -0.98 -0.359 8
-0.301 -0.882 -0.323 9
-0.566 -0.819 -0.341 8
-0.723 -0.746 -0.592 8
-0.755 -0.704 -0.955 9
-0.725 -0.728 -1.163 6
-0.833 -0.767 -1.197 10
-1.03 -0.736 -1.103 9
-0.927 -0.662 -0.993 8
-1.079 -0.639 -0.887 9
-1.133 -0.674 -0.804 8
-1.071 -0.73 -0.749 8
-0.93 -0.786 -0.755 9
-0.797 -0.784 -0.753 8
-0.685 -0.704 -0.714 9
-0.617 -0.634 -0.643 8
-0.511 -0.535 -0.667 8
-0.39 -0.429 -0.822 7
-0.33 -0.301 -1.001 10
-0.437 -0.07 -0.859 9
-0.626 0.249 -0.467 8
-0.563 0.224 -0.42 8
-0.702 0.501 -0.378 9
-0.694 0.717 0.174 8
-0.528 0.869 0.368 9
-0.342 0.998 0.317 8
-0.407 1.208 0.21 8
-0.735 1.479 0.284 9
-0.661 1.331 0.256 8
-1.201 1.666 0.635 7
-1.774 1.989 1.192 10
-2.011 2.115 1.618 8
-1.9 2.068 1.947 9
-1.711 2.012 2.239 8
-1.759 2.098 2.407 8
-1.583 1.888 2.166 9
-1.882 2.205 2.332 8
-2.142 2.525 2.394 9
-2.234 2.658 2.172 8
-2.162 2.668 1.811 8
-1.9 2.699 1.494 9
-1.71 2.429 1.345 7
-1.315 2.5 1.151 10
-1.079 2.517 1.182 8
-1.291 2.623 1.345 8
-1.782 2.811 1.327 9
-2.243 2.932 0.945 8
-2.455 2.99 0.517 9
-2.209 2.691 0.465 8
-2.01 2.527 0.318 8
-1.407 1.984 0.58 9
-0.707 1.215 1.201 8
-0.191 0.445 1.805 9
-0.018 -0.033 2.211 6
-0.181 -0.146 2.323 10
-0.163 -0.131 2.09 9
-0.445 -0.164 1.855 8
-0.685 -0.264 1.51 8
-0.81 -0.338 1.329 9
-0.708 -0.375 1.374 8
-0.579 -0.281 1.493 9
-1.331 0.078 1.451 8
-1.198 0.071 1.306 8
-2.99 0.694 1.265 9
-4.892 1.298 1.681 8
-6.057 1.62 2.623 7
-5.889 1.442 3.368 10
-4.515 0.755 3.291 8
-4.064 0.679 2.962 9
-2.466 -0.058 2.303 8
-1.31 -0.599 1.23 9
-0.595 -0.872 -0.192 8
-0.311 -1.076 -1.378 8
-0.396 -1.594 -1.842 9
-0.544 -2.477 -1.5 8
-0.49 -2.229 -1.35 9
-0.586 -3.181 -0.375 8
-0.513 -4.035 0.581 7
-0.142 -4.747 0.958 10
0.247 -5.033 0.772 8
0.417 -4.903 0.415 9
0.475 -4.606 0.408 8
0.427 -4.145 0.367 8
0.601 -4.011 0.589 9
0.956 -4.045 0.482 8
1.288 -3.968 0.093 9
1.503 -3.672 -0.388 8
1.804 -3.378 -1.049 8
1.623 -3.04 -0.944 9
2.174 -2.918 -1.872 6
2.865 -2.869 -3.115 10
3.447 -2.758 -4.364 9
3.587 -2.411 -5.229 8
3.161 -1.747 -5.502 9
2.396 -0.962 -5.073 8
2.156 -0.865 -4.565 8
1.499 -0.334 -3.671 9
1.095 -0.099 -2.609 8
0.878 -0.003 -1.68 9
0.757 0.028 -1.068 8
0.646 0.075 -0.75 8
0.581 0.067 -0.675 7
0.318 0.348 -0.514 10
-0.093 0.868 -0.4 9
-0.494 1.269 -0.256 8
-0.853 1.463 -0.127 8
-1.062 1.557 -0.007 9
-1.107 1.515 0.218 8
-0.972 1.31 0.515 8
-0.875 1.179 0.464 9
-0.519 0.919 0.624 8
-0.139 0.777 0.601 9
0.056 0.783 0.536 8
0.064 0.842 0.515 7
0.001 0.88 0.619 10
0.0 0.792 0.557 8
-0.128 0.777 0.744 9
-0.236 0.736 0.847 8
-0.256 0.677 0.904 8
-0.254 0.6 1.048 9
-0.244 0.482 1.366 8
-0.304 0.382 1.69 9
-0.273 0.344 1.521 8
-0.413 0.324 1.647 8
-0.538 0.329 1.593 9
-0.565 0.319 1.383 6
-0.386 0.244 1.105 11
-0.065 0.08 0.869 8
0.256 -0.155 0.649 8
0.231 -0.139 0.584 9
0.558 -0.367 0.411 8
0.792 -0.504 0.347 9
0.914 -0.624 0.458 8
0.98 -0.803 0.689 8
0.981 -1.021 0.937 9
0.883 -0.919 0.843 8
0.871 -1.111 0.983 8
0.831 -1.183 0.882 7
0.736 -1.133 0.671 10
0.575 -1.041 0.523 9
0.364 -0.969 0.59 8
0.201 -0.924 0.788 8
0.181 -0.832 0.709 9
0.137 -0.843 0.767 8
0.175 -0.863 0.644 9
0.141 -0.863 0.428 8
-0.015 -0.951 0.18 8
-0.23 -1.097 -0.051 9
-0.441 -1.155 -0.207 8
-0.397 -1.039 -0.186 7
-0.541 -1.053 -0.203 10
-0.656 -1.053 -0.12 8
-0.806 -0.981 -0.07 9
-1.008 -0.786 -0.253 8
-1.172 -0.423 -0.619 9
-1.055 -0.38 -1.077 8
-1.146 -0.342 -0.969 8
-1.174 0.306 -1.444 9
-1.16 0.478 -1.693 8
-1.142 0.482 -1.634 8
-1.119 0.308 -1.249 9
-1.007 0.277 -1.124 7
-1.029 -0.026 -0.61 10
-1.108 -0.261 -0.225 8
-1.157 -0.29 -0.044 8
-1.1 -0.287 -0.053 9
-0.915 -0.329 -0.205 8
-0.593 -0.415 -0.477 9
-0.26 -0.509 -0.74 8
-0.234 -0.458 -0.666 8
-0.018 -0.471 -0.789 9
0.036 -0.398 -0.747 8
-0.177 -0.174 -0.39 9
-0.606 0.15 0.06 6
-1.068 0.383 0.275 10
-1.355 0.498 0.332 9
-1.22 0.448 0.299 8
-1.203 0.459 0.086 9
-0.868 0.385 -0.503 8
-0.281 0.277 -1.146 8
0.233 0.19 -1.541 9
0.416 0.192 -1.57 8
0.374 0.173 -1.413 9
0.342 0.21 -0.972 8
0.28 0.214 -0.198 8
0.298 0.222 0.469 7
0.451 0.292 0.776 10
0.815 0.455 0.751 8
1.245 0.726 0.572 9
1.12 0.653 0.515 8
1.446 0.981 0.34 9
1.705 1.308 0.106 8
1.921 1.555 -0.125 8
2.108 1.673 -0.066 9
2.262 1.859 0.324 8
2.212 2.187 0.829 9
1.991 1.968 0.746 8
1.743 2.433 1.139 7
1.523 2.921 1.129 10
1.469 3.325 0.744 8
1.499 3.654 0.284 9
1.475 3.845 -0.045 8
1.328 3.46 -0.041 8
1.216 3.616 -0.051 9
0.965 3.644 0.282 8
0.596 3.353 0.831 9
0.279 2.852 1.342 8
0.102 2.38 1.593 8
0.02 2.005 1.658 9
0.018 1.805 1.492 6
0.0 1.36 1.493 10
0.04 0.869 1.518 9
0.13 0.438 1.665 8
0.312 0.0 1.821 9
0.612 -0.34 1.801 8
1.039 -0.509 1.447 8
0.935 -0.458 1.302 9
1.322 -0.503 0.726 8
1.253 -0.46 0.234 9
0.759 -0.379 0.029 8
0.16 -0.343 0.083 8
0.144 -0.308 0.075 7
-0.155 -0.383 -0.058 10
-0.14 -0.345 -0.052 9
0.258 -0.388 -0.289 8
0.711 -0.4 -0.399 8
1.035 -0.354 -0.51 9
1.163 -0.268 -0.634 8
1.061 -0.152 -0.596 9
0.955 -0.137 -0.536 8
0.314 -0.043 -0.112 8
-0.752 0.118 0.91 9
-1.509 0.175 2.094 8
-1.507 -0.068 2.68 7
-0.731 -0.49 2.336 10
0.388 -0.832 1.299 8
0.349 -0.749 1.169 9
1.357 -0.857 -0.01 8
2.136 -0.856 -1.042 8
2.615 -0.868 -1.885 9
2.701 -0.889 -2.438 8
2.222 -0.823 -2.317 9
1.231 -0.518 -1.394 8
1.108 -0.466 -1.255 8
0.117 -0.074 -0.255 9
-0.335 0.051 0.283 7
-0.106 -0.102 0.271 10
0.59 -0.364 -0.434 8
1.571 -0.583 -1.603 8
1.414 -0.525 -1.443 9
2.385 -0.74 -2.505 8
2.841 -0.968 -3.084 9
2.438 -0.945 -2.905 8
1.369 -0.644 -1.95 8
0.188 -0.282 -0.711 9
-0.652 -0.067 0.269 8
-0.586 -0.061 0.242 9
-0.897 -0.09 0.678 6
-0.659 -0.251 0.461 10
-0.118 -0.471 -0.24 9
0.29 -0.631 -0.829 8
0.429 -0.678 -1.023 9
0.497 -0.747 -1.032 8
0.447 -0.672 -0.928 8
0.564 -0.802 -0.94 9
0.712 -0.967 -0.916 8
0.949 -1.266 -0.823 8
1.263 -1.645 -0.759 9
1.516 -1.999 -0.662 8
1.365 -1.799 -0.595 7
1.463 -1.994 -0.562 10
1.348 -1.967 -0.669 8
0.942 -1.797 -0.662 9
0.447 -1.479 -0.554 8
0.201 -1.253 -0.704 9
0.258 -1.203 -1.125 8
0.232 -1.082 -1.012 8
0.488 -1.039 -1.54 9
0.779 -0.978 -1.987 8
1.058 -0.907 -2.223 9
1.359 -0.908 -2.314 8
1.65 -0.966 -2.157 7
1.703 -0.917 -1.718 10
1.532 -0.825 -1.546 8
1.311 -0.659 -1.013 9
1.007 -0.471 -0.587 8
0.674 -0.287 -0.429 8
0.392 -0.068 -0.448 9
0.325 0.119 -0.478 8
0.385 0.233 -0.498 9
0.347 0.209 -0.448 8
0.392 0.312 -0.4 8
0.385 0.408 -0.283 9
0.202 0.511 -0.024 6
-0.129 0.72 0.445 10
-0.391 0.974 0.966 9
-0.351 1.107 1.322 8
-0.316 0.996 1.189 9
-0.435 1.032 1.298 8
-0.25 0.983 1.182 8
0.03 0.901 0.818 9
0.254 0.852 0.393 8
0.295 0.878 0.021 9
0.266 0.79 0.019 8
0.159 0.911 -0.336 8
-0.01 1.05 -0.466 7
-0.138 1.178 -0.257 10
-0.194 1.23 0.182 9
-0.238 1.179 0.801 8
-0.273 1.119 1.42 8
-0.245 1.007 1.278 9
-0.226 0.949 1.662 8
-0.103 0.86 1.691 9
0.066 0.791 1.368 8
0.134 0.805 0.838 8
0.046 0.944 0.205 9
-0.087 1.076 -0.346 8
-0.079 0.968 -0.312 7
-0.192 0.99 -0.585 10
-0.386 0.941 -0.548 8
-0.616 0.823 -0.186 9
-0.724 0.643 0.217 8
-0.697 0.389 0.466 8
-0.628 0.35 0.419 9
-0.623 0.158 0.377 8
-0.682 0.152 0.893 9
-0.708 0.237 0.749 8
-0.681 0.3 0.491 8
-0.644 0.359 0.325 9
-0.58 0.323 0.293 7
-0.553 0.412 0.263 10
-0.476 0.414 0.379 8
-0.32 0.357 0.589 8
-0.122 0.368 0.656 9
0.132 0.451 0.467 8
0.356 0.519 0.171 9
0.439 0.556 -0.092 8
0.395 0.501 -0.083 8
0.4 0.544 -0.295 9
0.363 0.545 -0.443 8
0.287 0.515 -0.501 9
0.167 0.482 -0.447 6
-0.015 0.444 -0.295 10
-0.23 0.409 -0.138 9
-0.207 0.368 -0.124 8
-0.349 0.335 -0.03 8
-0.374 0.266 0.009 9
-0.329 0.159 0.023 8
-0.271 0.04 0.028 9
-0.273 -0.051 0.033 8
-0.246 -0.046 0.03 8
-0.312 -0.051 0.047 9
-0.419 0.002 0.107 8
-0.52 0.031 0.203 7
-0.573 0.037 0.323 10
-0.578 0.018 0.417 8
-0.521 -0.061 0.396 9
-0.468 -0.054 0.356 8
-0.402 -0.134 0.25 9
-0.36 -0.152 0.108 8
-0.34 -0.146 0.002 8
-0.34 -0.136 -0.053 9
-0.331 -0.103 -0.079 8
-0.285 -0.083 -0.083 9
-0.256 -0.075 -0.074 8
-0.173 -0.094 -0.092 7
-0.053 -0.142 -0.112 10
0.056 -0.194 -0.118 8
0.104 -0.207 -0.1 9
0.086 -0.176 -0.025 8
0.078 -0.158 -0.023 8
0.013 -0.111 0.104 9
-0.099 -0.049 0.248 8
-0.202 0.028 0.379 8
-0.226 0.08 0.414 9
-0.14 0.081 0.291 8
-0.017 0.092 0.064 9
-0.015 0.083 0.058 6
0.051 0.138 -0.122 10
0.069 0.2 -0.222 9
0.065 0.249 -0.294 8
0.061 0.281 -0.305 9
0.032 0.288 -0.248 8
-0.049 0.287 -0.112 8
-0.044 0.259 -0.101 9
-0.123 0.253 0.02 8
-0.126 0.239 0.031 9
-0.064 0.218 -0.016 8
0.012 0.191 -0.074 8
0.011 0.172 -0.066 7
0.122 0.154 -0.165 10
0.11 0.139 -0.149 9
0.1 0.127 -0.138 8
0.066 0.126 -0.11 8
0.062 0.112 -0.097 9
0.108 0.058 -0.078 8
0.157 -0.003 -0.053 8
0.141 -0.003 -0.047 9
0.158 -0.05 -0.001 8
0.142 -0.076 0.111 9
0.112 -0.079 0.274 8
0.104 -0.082 0.411 7
0.113 -0.088 0.451 10
0.101 -0.066 0.388 8
0.091 -0.059 0.349 9
0.065 -0.024 0.194 8
0.049 0.002 0.005 8
0.044 0.03 -0.123 9
0.037 0.048 -0.175 8
0.037 0.04 -0.162 9
0.046 0.011 -0.099 8
0.041 0.01 -0.089 8
0.035 0.001 -0.035 9
0.011 0.018 -0.038 6
0.003 0.028 -0.085 11
0.014 0.027 -0.138 8
0.023 0.032 -0.185 8
0.021 0.029 -0.167 9
0.036 0.034 -0.177 8
0.059 0.021 -0.15 9
0.081 0.005 -0.126 8
0.096 0.007 -0.108 8
0.103 0.012 -0.105 9
0.093 0.022 -0.121 8
0.084 0.02 -0.109 8
0.041 0.043 -0.122 7
-0.016 0.068 -0.112 10
-0.06 0.073 -0.081 9
-0.073 0.058 -0.045 8
-0.042 0.023 -0.024 8
0.0 -0.028 -0.019 9
0.0 -0.025 -0.017 8
0.032 -0.062 -0.02 9
0.04 -0.071 -0.015 8
0.033 -0.061 -0.007 8
0.035 -0.084 -0.005 9
0.067 -0.132 0.0 8
0.061 -0.119 0.0 7
0.115 -0.149 0.099 10
0.146 -0.151 0.17 8
0.171 -0.133 0.135 9
0.18 -0.124 0.103 8
0.12 -0.083 0.101 9
0.014 -0.005 0.21 8
0.013 -0.004 0.189 8
-0.096 0.063 0.383 9
-0.19 0.106 0.524 8
-0.237 0.127 0.556 8
-0.208 0.109 0.482 9
-0.108 0.042 0.309 7
# end
#Thu Feb 26 20:42:07 GMT+08:00 20158
