# Supplementary material for: Abnormal Gait Behavior Detection for Elderly Based on Enhanced Wigner-Ville Analysis and Cloud Incremental SVM Learning
Source: Hindawi journal article supplement (doi:10.1155/2016/5869238), 2016-01-01
Supplement: f1 [file 5869238.f1.zip › Supplementary Materials/Original Data/Leftward fall With recovery/original__144.txt]

# Accelerometer Values
# filename:  original__144.txt
# Saving start time: Thu Feb 26 20:42:09 GMT+08:00 2015

# sensor resolution: 0.0095825195m/s^2
#Sensorvendor: KIONIX, name: KX023 Accelerometer, type: 1,version : 1, range 39.240005

# X value, Y value, Z value, time diff in ms
-0.064 -0.065 -0.058 8
-0.017 -0.104 -0.056 8
0.029 -0.116 -0.051 9
0.037 -0.095 -0.051 8
0.009 -0.057 -0.054 9
-0.034 -0.013 -0.055 8
-0.031 -0.011 -0.049 8
-0.062 0.032 -0.059 9
-0.055 0.064 -0.062 8
-0.021 0.084 -0.065 7
0.008 0.098 -0.094 10
0.026 0.114 -0.162 8
0.047 0.121 -0.213 9
0.043 0.109 -0.192 8
0.062 0.106 -0.166 9
0.073 0.098 -0.084 8
0.085 0.076 0.006 8
0.097 0.039 0.051 9
0.092 0.006 0.06 8
0.034 -0.001 0.055 9
0.03 -0.001 0.05 8
-0.093 0.013 0.058 7
-0.228 0.024 0.086 10
-0.313 0.021 0.117 8
-0.382 0.018 0.129 8
-0.434 0.023 0.136 9
-0.391 0.02 0.122 8
-0.38 0.013 0.141 9
-0.322 -0.019 0.148 8
-0.252 -0.047 0.135 8
-0.18 -0.067 0.11 9
-0.1 -0.108 0.068 8
0.0 -0.16 0.013 9
0.0 -0.144 0.011 6
0.095 -0.165 -0.035 10
0.173 -0.165 -0.081 9
0.238 -0.17 -0.118 8
0.253 -0.153 -0.116 9
0.233 -0.106 -0.082 8
0.214 -0.056 -0.051 8
0.193 -0.05 -0.046 9
0.186 0.001 -0.038 8
0.18 0.058 -0.049 9
0.154 0.101 -0.054 8
0.102 0.133 -0.047 8
0.092 0.119 -0.043 7
-0.011 0.191 -0.052 10
-0.01 0.172 -0.047 8
-0.072 0.175 -0.035 9
-0.12 0.174 -0.021 8
-0.152 0.17 -0.005 9
-0.167 0.153 0.015 8
-0.167 0.121 0.054 8
-0.15 0.109 0.049 9
-0.15 0.072 0.107 8
-0.149 0.034 0.167 9
-0.138 -0.003 0.189 8
-0.127 -0.04 0.181 7
-0.126 -0.073 0.164 10
-0.112 -0.105 0.161 8
-0.101 -0.094 0.145 9
-0.069 -0.132 0.198 8
-0.017 -0.173 0.286 8
0.057 -0.203 0.35 9
0.125 -0.224 0.356 8
0.177 -0.236 0.289 9
0.211 -0.225 0.139 8
0.19 -0.202 0.125 8
0.188 -0.147 -0.043 9
0.155 -0.072 -0.159 6
0.103 -0.014 -0.215 11
0.06 0.035 -0.25 8
0.045 0.074 -0.277 8
0.041 0.067 -0.249 9
0.06 0.081 -0.271 8
0.106 0.072 -0.295 9
0.147 0.056 -0.323 8
0.166 0.05 -0.334 8
0.173 0.051 -0.337 9
0.176 0.055 -0.371 8
0.158 0.049 -0.334 8
0.178 0.06 -0.396 7
0.223 0.07 -0.49 10
0.281 0.076 -0.602 9
0.353 0.083 -0.678 8
0.42 0.067 -0.706 8
0.454 0.016 -0.689 9
0.408 0.014 -0.62 8
0.421 -0.058 -0.579 9
0.448 -0.167 -0.518 8
0.484 -0.306 -0.449 8
0.523 -0.423 -0.348 9
0.544 -0.493 -0.22 8
0.489 -0.444 -0.198 7
0.468 -0.462 -0.089 10
0.429 -0.447 -0.012 8
0.417 -0.409 0.037 9
0.419 -0.364 -0.005 8
0.401 -0.402 -0.144 9
0.391 -0.501 -0.265 8
0.352 -0.451 -0.238 8
0.341 -0.519 -0.306 9
0.312 -0.54 -0.347 8
0.293 -0.565 -0.347 8
0.327 -0.615 -0.282 9
0.46 -0.641 -0.224 7
0.651 -0.602 -0.268 10
0.586 -0.542 -0.241 8
0.758 -0.477 -0.424 8
0.856 -0.418 -0.661 9
0.866 -0.383 -0.896 8
0.769 -0.401 -1.078 9
0.578 -0.462 -1.102 8
0.281 -0.535 -0.985 8
0.253 -0.482 -0.886 9
-0.053 -0.568 -0.728 8
-0.243 -0.686 -0.564 9
-0.356 -0.852 -0.411 6
-0.392 -1.051 -0.294 10
-0.399 -1.262 -0.231 9
-0.359 -1.136 -0.208 8
-0.391 -1.355 -0.187 9
-0.437 -1.539 -0.169 8
-0.486 -1.599 -0.13 8
-0.514 -1.528 -0.144 9
-0.535 -1.395 -0.26 8
-0.529 -1.261 -0.452 9
-0.476 -1.134 -0.406 8
-0.38 -1.074 -0.579 8
-0.178 -1.119 -0.684 7
0.0 -1.211 -0.687 10
0.093 -1.224 -0.486 8
0.159 -1.214 -0.204 9
0.176 -1.231 -0.011 8
0.158 -1.107 -0.01 9
0.13 -1.076 0.131 8
0.108 -1.03 0.212 8
0.095 -0.986 0.217 9
0.082 -0.839 0.202 8
0.001 -0.644 0.261 9
0.001 -0.58 0.426 8
-0.206 -0.383 0.384 7
-0.423 -0.065 0.446 10
-0.561 0.32 0.311 8
-0.671 0.627 0.159 9
-0.753 0.877 0.097 8
-0.838 1.044 0.07 8
-0.755 0.94 0.063 9
-0.82 1.072 -0.004 8
-0.77 1.154 0.001 9
-0.647 1.093 0.156 8
-0.49 0.986 0.355 8
-0.421 0.942 0.519 9
-0.379 0.848 0.467 6
-0.619 1.012 0.656 10
-1.204 1.395 0.977 9
-1.916 1.88 1.358 8
-2.439 2.295 1.672 9
-2.401 2.496 1.719 8
-1.677 2.391 1.404 8
-0.527 2.045 0.938 9
-0.475 1.841 0.844 8
0.531 1.566 0.676 9
0.808 1.501 1.131 8
0.247 1.763 1.995 8
-0.798 2.285 2.765 7
-1.915 2.863 3.119 10
-1.724 2.576 2.807 9
-2.549 3.176 2.718 8
-2.775 3.589 2.197 8
-2.471 3.655 1.598 9
-1.89 3.294 1.422 8
-1.394 2.692 1.97 9
-1.108 2.089 2.878 8
-0.997 1.88 2.59 8
-0.785 1.311 3.333 9
-0.674 0.841 3.56 8
-0.763 0.602 3.125 7
-1.027 0.611 2.288 10
-1.358 0.767 1.393 8
-1.621 0.912 0.727 9
-1.459 0.821 0.654 8
-1.505 0.72 0.387 8
-1.454 0.352 0.622 9
-1.594 0.04 1.293 8
-2.082 -0.184 2.119 9
-2.93 -0.415 2.764 8
-2.637 -0.374 2.487 8
-3.393 -0.59 2.709 9
-3.504 -0.814 2.323 7
-2.889 -1.119 1.49 10
-1.728 -1.606 0.575 8
-0.403 -2.192 -0.188 8
0.732 -2.776 -0.755 9
0.658 -2.498 -0.68 8
1.43 -3.008 -1.177 9
1.668 -3.182 -1.535 8
1.243 -3.069 -1.709 8
0.201 -2.782 -1.835 9
-0.96 -2.357 -1.851 8
-1.705 -2.011 -1.725 9
-1.535 -1.809 -1.552 6
-1.698 -1.697 -1.38 10
-1.449 -1.779 -1.136 9
-1.121 -1.885 -0.975 8
-0.847 -1.927 -1.081 9
-0.737 -1.839 -1.462 8
-0.971 -1.497 -1.958 8
-0.874 -1.347 -1.762 9
-1.403 -0.891 -1.978 8
-1.811 -0.574 -1.697 8
-1.896 -0.559 -1.258 9
-1.648 -0.728 -0.993 8
-1.483 -0.656 -0.894 7
-0.939 -0.838 -0.833 10
-0.391 -0.992 -0.889 8
-0.205 -0.934 -0.979 9
-0.339 -0.617 -1.003 8
-0.508 -0.303 -0.976 9
-0.531 -0.142 -0.975 8
-0.4 -0.065 -0.948 8
-0.36 -0.058 -0.853 9
-0.132 0.024 -0.829 8
0.205 0.133 -0.971 9
0.589 0.215 -1.295 8
1.014 0.251 -1.619 7
1.384 0.241 -1.844 10
1.63 0.198 -1.93 8
1.467 0.178 -1.737 9
1.622 0.173 -1.632 8
1.656 0.184 -1.384 8
1.6 0.17 -0.971 9
1.436 0.153 -0.321 8
1.156 0.141 0.406 8
0.878 0.121 0.983 9
0.79 0.109 0.885 8
0.619 0.065 1.185 9
0.578 0.034 1.133 6
0.672 0.026 0.823 10
0.793 -0.041 0.493 9
0.931 -0.233 0.358 8
0.838 -0.209 0.322 9
0.97 -0.498 0.378 8
1.001 -0.796 0.502 8
0.954 -0.981 0.641 9
0.867 -1.059 0.727 8
0.783 -1.181 0.722 9
0.702 -1.288 0.648 8
0.632 -1.159 0.583 8
0.575 -1.177 0.536 7
0.625 -1.153 0.551 10
0.774 -1.166 0.556 9
0.844 -1.16 0.433 8
0.695 -1.057 0.212 8
0.308 -0.887 0.093 9
0.277 -0.798 0.084 8
-0.302 -0.618 0.157 9
-0.921 -0.502 0.438 8
-1.367 -0.492 0.811 8
-1.5 -0.645 1.144 9
-1.336 -0.909 1.169 8
-1.203 -0.818 1.052 7
-0.906 -0.935 0.671 10
-0.649 -0.897 0.211 8
-0.488 -0.923 -0.078 9
-0.344 -1.116 -0.113 8
-0.237 -1.422 0.051 8
-0.362 -1.629 0.263 9
-0.325 -1.466 0.236 8
-0.65 -1.483 0.393 9
-0.884 -1.36 0.391 8
-0.956 -1.095 0.113 8
-0.923 -0.617 -0.335 9
-0.839 -0.079 -0.866 7
-0.732 0.367 -1.422 10
-0.658 0.33 -1.279 8
-0.532 0.666 -1.66 8
-0.443 0.919 -1.741 9
-0.465 1.229 -1.547 8
-0.586 1.663 -1.262 9
-0.779 2.073 -1.026 8
-1.004 2.304 -0.694 8
-0.904 2.074 -0.624 9
-1.182 2.231 -0.28 8
-1.507 2.4 -0.144 8
-1.882 2.597 -0.127 7
-2.065 2.686 -0.242 10
-1.784 2.489 -0.528 9
-1.606 2.24 -0.475 8
-0.956 1.875 -0.748 8
-0.158 1.35 -0.849 9
0.554 0.786 -0.721 8
0.978 0.363 -0.513 9
1.125 0.105 -0.359 8
1.112 -0.014 -0.246 8
1.001 -0.013 -0.221 9
0.875 0.003 -0.022 8
0.921 0.12 0.18 7
1.319 0.187 0.158 10
1.872 0.211 0.031 8
2.435 0.223 -0.072 9
2.974 0.245 -0.145 8
2.676 0.22 -0.13 9
3.04 0.291 -0.201 8
3.014 0.426 -0.166 8
2.687 0.608 0.141 9
2.296 0.868 0.573 8
1.942 1.29 0.971 9
1.747 1.161 0.874 8
1.47 1.622 1.263 7
1.212 1.966 1.629 10
1.085 2.189 1.775 8
1.257 2.216 1.617 8
1.578 2.091 1.401 9
1.931 1.957 1.205 8
1.738 1.761 1.084 9
1.98 1.76 0.984 8
2.005 1.788 1.111 8
1.702 1.773 1.581 9
1.085 1.783 2.335 8
0.328 1.785 3.088 9
0.295 1.606 2.779 6
-0.429 1.558 3.294 10
-0.75 1.418 3.382 9
-0.5 1.101 3.046 8
0.066 0.645 2.457 9
0.754 0.094 1.736 8
1.482 -0.462 0.927 8
1.334 -0.415 0.834 9
1.599 -0.797 0.254 8
1.052 -0.999 0.176 9
-0.016 -1.046 0.51 8
-1.116 -0.937 1.022 8
-1.706 -0.785 1.409 7
-1.503 -0.854 1.464 10
-1.353 -0.769 1.317 9
-0.519 -1.052 1.154 8
0.491 -1.32 1.029 8
1.247 -1.47 0.893 9
1.64 -1.51 0.608 8
1.828 -1.54 0.043 8
1.993 -1.574 -0.742 9
1.794 -1.417 -0.668 8
1.966 -1.448 -1.256 9
2.109 -1.52 -1.569 8
2.144 -1.612 -1.817 7
1.646 -1.562 -1.862 10
0.652 -1.272 -1.52 8
-0.164 -0.947 -1.178 9
-0.148 -0.853 -1.06 8
-0.524 -0.714 -1.061 8
-0.457 -0.695 -1.184 9
0.032 -0.787 -1.382 8
0.714 -0.943 -1.771 9
1.427 -1.051 -2.139 8
1.284 -0.946 -1.925 8
1.884 -1.017 -2.227 9
2.11 -1.004 -2.404 6
1.627 -0.833 -2.197 11
0.417 -0.406 -1.373 8
-0.839 0.166 -0.365 8
-1.629 0.509 0.092 9
-1.466 0.458 0.083 8
-1.624 0.462 -0.186 8
-1.147 0.292 -1.019 9
-0.271 0.055 -2.023 8
0.636 -0.284 -2.373 9
1.37 -0.643 -2.297 8
1.739 -0.856 -2.15 8
1.565 -0.771 -1.935 7
1.645 -0.864 -1.293 10
1.497 -0.965 -0.578 9
1.168 -1.083 -0.205 8
0.951 -1.152 -0.286 8
0.853 -1.215 -0.765 9
0.767 -1.093 -0.688 8
0.845 -1.243 -1.157 9
1.077 -1.247 -1.77 8
1.318 -1.117 -2.465 8
1.399 -1.088 -2.777 9
1.218 -1.027 -2.529 8
1.096 -0.924 -2.276 7
0.663 -0.676 -1.616 10
0.197 -0.363 -1.042 8
-0.011 -0.208 -0.722 9
0.001 -0.238 -0.588 8
0.186 -0.218 -0.655 9
0.439 -0.014 -0.768 8
0.559 0.268 -0.785 8
0.503 0.241 -0.707 9
0.379 0.525 -0.596 8
0.049 0.764 -0.297 8
-0.35 0.929 0.033 9
-0.671 0.976 0.225 7
-0.698 0.878 0.297 10
-0.629 0.68 0.281 8
-0.566 0.612 0.253 8
0.005 0.433 0.113 9
0.335 0.37 -0.132 8
0.566 0.434 -0.367 9
0.684 0.552 -0.509 8
0.71 0.678 -0.527 8
0.639 0.61 -0.475 9
0.574 0.7 -0.376 8
0.316 0.79 -0.102 9
-0.027 0.946 0.209 6
-0.243 1.066 0.416 10
-0.317 1.086 0.616 9
-0.274 1.041 0.761 8
-0.247 0.937 0.684 9
-0.137 0.838 0.616 8
-0.087 0.806 0.406 8
-0.12 0.89 0.257 9
-0.15 0.941 0.188 8
-0.162 0.959 0.174 9
-0.164 1.041 0.276 8
-0.147 0.937 0.248 8
-0.144 1.056 0.47 7
-0.145 1.085 0.623 10
-0.205 1.061 0.596 8
-0.357 1.084 0.442 9
-0.519 1.097 0.246 8
-0.467 0.987 0.221 9
-0.606 0.938 0.058 8
-0.709 0.876 -0.041 8
-0.724 0.816 -0.042 9
-0.614 0.676 0.069 8
-0.35 0.498 0.153 9
-0.026 0.273 0.178 8
-0.024 0.246 0.16 7
0.188 0.001 0.339 10
0.239 -0.148 0.681 8
0.189 -0.204 1.046 9
0.09 -0.2 1.303 8
0.026 -0.179 1.394 8
0.034 -0.123 1.398 9
0.03 -0.111 1.258 8
0.019 0.004 1.213 8
-0.019 0.16 1.053 9
-0.02 0.294 0.778 8
-0.04 0.368 0.511 9
-0.036 0.331 0.46 6
-0.113 0.364 0.283 10
-0.201 0.358 0.177 9
-0.259 0.334 0.166 8
-0.311 0.25 0.243 9
-0.337 0.096 0.33 8
-0.324 -0.059 0.357 8
-0.33 -0.144 0.358 9
-0.297 -0.13 0.322 8
-0.298 -0.162 0.286 9
-0.262 -0.202 0.162 8
-0.227 -0.191 0.024 8
-0.241 -0.126 -0.096 7
-0.278 -0.078 -0.114 10
-0.265 -0.148 0.024 9
-0.239 -0.133 0.022 8
-0.177 -0.249 0.191 8
-0.109 -0.31 0.284 9
-0.107 -0.324 0.334 8
-0.206 -0.283 0.399 9
-0.396 -0.118 0.439 8
-0.618 0.12 0.387 8
-0.557 0.108 0.348 9
-0.673 0.295 0.177 8
-0.716 0.41 -0.02 7
-0.777 0.461 -0.098 10
-0.782 0.473 -0.107 8
-0.671 0.443 -0.132 9
-0.604 0.398 -0.119 8
-0.357 0.31 -0.127 8
-0.074 0.176 -0.047 9
0.103 0.052 0.099 8
0.181 0.0 0.155 9
0.217 -0.014 0.079 8
0.243 -0.03 -0.047 8
0.219 -0.027 -0.043 9
0.209 -0.025 -0.149 7
0.159 0.007 -0.168 10
0.149 0.034 -0.122 8
0.187 0.018 -0.082 8
0.213 0.014 -0.057 9
0.209 0.07 -0.044 8
0.188 0.063 -0.039 9
0.168 0.132 -0.08 8
0.13 0.192 -0.141 8
0.082 0.234 -0.14 9
0.039 0.254 -0.039 8
0.0 0.255 0.099 9
0.0 0.23 0.089 6
-0.012 0.222 0.144 10
0.022 0.179 0.044 9
0.061 0.122 -0.135 8
0.065 0.096 -0.218 8
0.053 0.086 -0.215 9
0.045 0.071 -0.189 8
0.041 0.064 -0.17 9
0.027 0.052 -0.126 8
0.01 0.057 -0.078 8
0.0 0.067 -0.016 9
0.001 0.059 0.022 8
0.017 0.044 -0.042 7
0.042 0.036 -0.215 10
0.038 0.032 -0.194 8
0.076 0.009 -0.352 9
0.13 -0.024 -0.418 8
0.175 -0.058 -0.429 9
0.142 -0.067 -0.477 8
0.048 0.016 -0.461 8
0.043 0.015 -0.415 9
-0.042 0.13 -0.392 8
-0.033 0.141 -0.393 9
0.035 0.073 -0.301 8
0.066 0.051 -0.209 7
0.084 0.056 -0.113 10
0.068 0.064 0.013 8
0.061 0.057 0.012 9
0.018 0.055 0.198 8
0.0 0.035 0.385 8
0.025 -0.007 0.466 9
0.059 -0.092 0.489 8
# end
#Thu Feb 26 20:42:13 GMT+08:00 20150
