# Supplementary material for: Abnormal Gait Behavior Detection for Elderly Based on Enhanced Wigner-Ville Analysis and Cloud Incremental SVM Learning
Source: Hindawi journal article supplement (doi:10.1155/2016/5869238), 2016-01-01
Supplement: f1 [file 5869238.f1.zip › Supplementary Materials/Original Data/Leftward fall With recovery/original__145.txt]

# Accelerometer Values
# filename:  original__145.txt
# Saving start time: Thu Feb 26 20:42:14 GMT+08:00 2015

# sensor resolution: 0.0095825195m/s^2
#Sensorvendor: KIONIX, name: KX023 Accelerometer, type: 1,version : 1, range 39.240005

# X value, Y value, Z value, time diff in ms
0.029 -0.049 0.2 8
0.063 -0.085 0.1 9
0.102 -0.102 0.035 8
0.107 -0.062 -0.027 9
0.052 0.011 -0.091 8
-0.018 0.076 -0.159 8
-0.111 0.13 -0.261 9
-0.1 0.117 -0.235 8
-0.18 0.153 -0.278 9
-0.171 0.142 -0.207 6
-0.098 0.091 -0.109 10
-0.03 0.026 -0.009 9
0.001 -0.047 0.076 8
0.001 -0.042 0.068 9
-0.002 -0.081 0.101 8
-0.046 -0.075 0.13 8
-0.089 -0.07 0.171 9
-0.09 -0.074 0.127 8
-0.052 -0.082 0.029 8
-0.009 -0.084 -0.044 9
-0.008 -0.076 -0.04 8
0.006 -0.065 -0.124 7
0.001 -0.035 -0.236 10
-0.019 0.009 -0.32 8
-0.026 0.035 -0.346 9
-0.006 0.034 -0.316 8
0.007 0.023 -0.218 9
0.007 0.021 -0.196 8
0.0 0.006 -0.064 8
-0.026 0.001 0.052 9
-0.057 0.013 0.106 8
-0.064 0.026 0.098 9
-0.052 0.04 0.067 8
-0.046 0.036 0.06 7
-0.022 0.025 0.029 10
0.017 0.002 -0.005 8
0.064 -0.021 -0.055 9
0.065 0.006 -0.108 8
0.022 0.064 -0.102 8
0.026 0.064 -0.084 9
0.024 0.058 -0.076 8
0.062 0.042 -0.129 9
0.097 0.029 -0.129 8
0.113 0.02 -0.03 8
0.106 0.018 0.093 9
0.09 0.026 0.242 6
0.084 0.02 0.325 10
0.076 0.018 0.292 9
0.082 0.005 0.282 8
0.096 0.006 0.213 9
0.129 0.002 0.105 8
0.17 -0.022 0.04 8
0.209 -0.036 0.006 9
0.263 -0.031 -0.012 8
0.237 -0.028 -0.011 9
0.319 -0.027 -0.016 8
0.404 -0.046 -0.015 8
0.417 -0.036 0.013 7
0.349 0.0 0.055 10
0.311 -0.005 0.054 9
0.28 -0.005 0.049 8
0.318 -0.042 0.008 8
0.396 -0.091 -0.081 9
0.455 -0.102 -0.271 8
0.401 -0.036 -0.501 9
0.266 0.043 -0.549 8
0.187 0.056 -0.449 8
0.169 0.051 -0.404 9
0.224 -0.017 -0.311 8
0.333 -0.124 -0.283 7
0.421 -0.248 -0.378 10
0.498 -0.402 -0.524 8
0.568 -0.536 -0.617 9
0.658 -0.59 -0.633 8
0.592 -0.531 -0.569 8
0.683 -0.554 -0.548 9
0.751 -0.591 -0.467 8
0.808 -0.626 -0.267 9
0.839 -0.638 0.028 8
0.833 -0.653 0.291 8
0.75 -0.588 0.262 9
0.728 -0.651 0.41 7
0.687 -0.743 0.448 10
0.624 -0.831 0.419 8
0.526 -0.938 0.335 8
0.388 -1.033 0.265 9
0.235 -1.062 0.255 8
0.212 -0.956 0.229 9
0.07 -0.943 0.239 8
-0.044 -0.904 0.194 8
-0.164 -0.862 0.075 9
-0.328 -0.788 -0.018 8
-0.48 -0.7 -0.016 8
-0.432 -0.63 -0.014 7
-0.563 -0.575 0.036 10
-0.629 -0.552 -0.001 9
-0.561 -0.617 -0.259 8
-0.393 -0.736 -0.722 8
-0.157 -0.855 -1.203 9
0.004 -0.945 -1.56 8
0.023 -0.956 -1.715 9
0.021 -0.86 -1.544 8
-0.034 -0.858 -1.594 8
-0.188 -0.818 -1.406 9
-0.474 -0.726 -0.882 8
-0.722 -0.655 -0.45 7
-0.756 -0.585 -0.387 10
-0.681 -0.526 -0.348 8
-0.56 -0.446 -0.555 9
-0.332 -0.337 -0.9 8
-0.12 -0.221 -1.209 9
-0.052 -0.115 -1.329 8
-0.213 0.004 -1.308 8
-0.586 0.132 -0.987 9
-0.527 0.118 -0.888 8
-0.903 0.173 -0.245 9
-1.048 0.049 0.313 8
-0.938 -0.196 0.524 7
-0.712 -0.473 0.441 10
-0.486 -0.708 0.196 8
-0.289 -0.819 -0.14 9
-0.26 -0.737 -0.126 8
-0.066 -0.73 -0.463 8
0.13 -0.661 -0.715 9
0.291 -0.473 -0.869 8
0.288 -0.1 -0.907 9
0.055 0.348 -0.843 8
-0.285 0.765 -0.627 8
-0.257 0.688 -0.565 9
-0.524 1.043 -0.284 6
-0.577 1.259 -0.107 10
-0.487 1.263 -0.022 9
-0.339 1.175 -0.042 8
-0.122 1.08 -0.094 9
-0.11 0.972 -0.084 8
0.177 0.843 0.036 8
0.434 0.749 0.346 9
0.589 0.768 0.756 8
0.684 0.84 1.073 9
0.634 1.008 1.173 8
0.208 1.402 1.191 8
0.188 1.262 1.072 7
-0.577 1.795 1.277 10
-1.313 2.277 1.661 9
-1.668 2.514 1.999 8
-1.484 2.37 2.192 8
-1.037 2.029 2.476 9
-0.731 1.788 3.102 8
-0.657 1.609 2.792 8
-0.498 1.551 3.449 9
-0.473 1.63 3.763 8
-0.538 1.774 3.603 9
-0.623 1.97 3.103 8
-0.56 1.773 2.793 7
-1.297 2.682 2.33 10
-1.168 2.414 2.097 8
-1.422 2.623 1.822 9
-1.451 2.416 1.612 8
-1.15 1.789 1.441 8
-0.504 0.897 1.293 9
0.235 -0.063 1.152 8
0.212 -0.056 1.037 9
0.788 -0.769 0.824 8
1.078 -1.118 0.457 8
0.861 -1.131 0.085 9
0.027 -0.773 -0.178 6
-1.175 -0.217 -0.448 11
-2.391 0.22 -0.592 8
-2.152 0.198 -0.533 8
-3.315 0.551 -0.189 9
-4.388 0.896 0.393 8
-5.139 1.109 0.703 9
-5.411 1.228 0.681 8
-5.417 1.374 0.629 8
-5.195 1.594 0.667 9
-4.675 1.435 0.6 8
-4.08 1.569 0.553 8
-3.001 1.341 0.163 7
-1.545 0.715 -0.624 10
-0.164 -0.106 -1.568 9
0.569 -0.783 -2.395 8
0.332 -1.108 -2.724 8
0.299 -0.997 -2.452 9
-0.654 -1.098 -2.351 8
-1.74 -1.115 -2.086 9
-2.484 -1.214 -1.709 8
-2.586 -1.56 -1.142 8
-2.111 -2.178 -0.408 9
-1.9 -1.96 -0.367 8
-1.086 -2.726 0.339 7
-0.465 -3.329 0.88 10
-0.42 -3.509 1.168 8
-0.577 -3.409 1.293 9
-0.738 -3.387 1.282 8
-0.96 -3.422 1.033 9
-0.864 -3.08 0.93 8
-1.026 -3.112 0.494 8
-1.113 -3.048 0.021 9
-1.165 -2.873 -0.263 8
-1.047 -2.72 -0.424 8
-0.672 -2.669 -0.732 9
-0.605 -2.402 -0.659 7
-0.168 -2.341 -1.034 10
0.187 -2.074 -1.288 8
0.445 -1.725 -1.442 8
0.52 -1.504 -1.404 9
0.396 -1.341 -1.066 8
0.296 -1.271 -0.562 9
0.417 -1.307 -0.13 8
0.375 -1.176 -0.117 8
0.62 -1.184 0.089 9
0.906 -1.156 -0.015 8
1.245 -1.057 -0.307 9
1.463 -0.824 -0.6 6
1.452 -0.53 -0.847 10
1.306 -0.477 -0.762 9
1.257 -0.271 -0.892 8
1.222 -0.178 -0.823 9
1.154 -0.133 -0.621 8
1.06 -0.093 -0.414 8
0.964 -0.01 -0.304 9
0.857 0.198 -0.267 8
0.771 0.178 -0.24 9
0.659 0.424 -0.226 8
0.538 0.623 -0.201 8
0.463 0.761 -0.123 7
0.505 0.752 0.0 10
0.687 0.647 0.094 8
0.925 0.575 0.185 9
0.833 0.517 0.166 8
0.901 0.513 0.35 9
0.644 0.578 0.598 8
0.171 0.722 0.834 8
-0.207 0.813 1.158 9
-0.249 0.696 1.489 8
-0.224 0.627 1.34 9
0.004 0.328 1.47 8
0.329 -0.059 1.438 7
0.629 -0.426 1.322 10
0.825 -0.643 1.098 8
0.92 -0.714 0.741 9
0.93 -0.711 0.43 8
0.837 -0.64 0.387 8
0.792 -0.61 0.335 9
0.607 -0.562 0.478 8
0.233 -0.499 0.623 9
-0.117 -0.424 0.693 8
-0.351 -0.331 0.709 8
-0.587 -0.263 0.461 9
-0.529 -0.237 0.415 6
-0.672 -0.238 0.019 11
-0.644 -0.257 -0.218 8
-0.626 -0.262 -0.35 8
-0.801 -0.251 -0.291 9
-1.156 -0.215 0.027 8
-1.53 -0.144 0.33 8
-1.377 -0.13 0.297 9
-1.616 -0.04 0.437 8
-1.678 -0.044 0.485 9
-1.724 -0.144 0.443 8
-1.866 -0.286 0.369 8
-1.679 -0.257 0.332 7
-1.801 -0.439 0.189 10
-1.781 -0.589 -0.148 9
-1.655 -0.622 -0.583 8
-1.401 -0.57 -0.937 8
-1.098 -0.49 -1.166 9
-0.834 -0.392 -1.433 8
-0.711 -0.249 -1.814 9
-0.64 -0.224 -1.632 8
-0.652 -0.028 -1.944 8
-0.691 0.118 -2.085 9
-0.733 0.23 -2.063 8
-0.753 0.397 -1.872 7
-0.679 0.543 -1.576 10
-0.416 0.55 -1.217 8
-0.375 0.495 -1.095 9
0.049 0.391 -0.814 8
0.495 0.303 -0.662 8
0.823 0.303 -0.624 9
0.986 0.406 -0.693 8
1.015 0.601 -0.621 9
0.913 0.781 -0.306 8
0.848 0.703 -0.275 8
0.768 0.824 0.03 9
0.811 0.858 0.253 7
1.122 0.75 0.368 10
1.702 0.554 0.325 8
2.306 0.443 0.241 8
2.075 0.399 0.217 9
2.471 0.421 0.19 8
2.534 0.635 0.356 9
2.274 0.942 0.674 8
1.963 1.232 0.918 8
1.841 1.551 1.028 9
1.897 1.831 1.034 8
1.707 1.648 0.931 9
2.015 1.967 0.817 6
2.434 2.274 0.596 10
2.803 2.506 0.372 9
2.84 2.765 0.273 8
2.422 3.113 0.507 8
1.819 3.394 1.045 9
1.637 3.054 0.941 8
1.236 3.122 1.52 9
1.179 2.939 1.944 8
1.193 2.681 2.265 8
1.127 2.559 2.497 9
0.974 2.549 2.544 8
0.876 2.294 2.289 7
0.684 2.186 2.225 10
0.593 1.805 2.096 8
0.564 1.337 2.055 9
0.361 0.855 2.213 8
-0.185 0.394 2.677 9
-0.79 0.026 3.246 8
-0.711 0.023 2.921 8
-0.892 -0.372 3.022 9
-0.546 -0.752 2.51 8
0.09 -1.111 1.64 9
0.757 -1.442 0.532 8
1.332 -1.5 -0.622 7
1.495 -1.193 -1.474 10
1.345 -1.073 -1.326 8
0.862 -0.581 -1.392 9
-0.258 -0.062 -0.426 8
-1.454 0.303 1.059 8
-1.911 0.196 2.184 9
-1.445 -0.357 2.335 8
-1.3 -0.321 1.49 8
-0.174 -0.973 1.341 9
1.235 -1.557 -0.1 8
2.543 -1.875 -1.651 9
3.518 -1.865 -2.897 6
4.103 -1.78 -3.581 10
4.221 -1.704 -3.653 9
3.799 -1.534 -3.288 8
3.176 -1.359 -2.759 9
1.91 -0.942 -1.733 8
0.467 -0.52 -0.797 8
-1.058 -0.096 -0.138 9
-2.259 0.313 0.482 8
-2.522 0.182 0.784 9
-2.27 0.163 0.706 8
-1.373 -0.439 0.27 8
0.318 -0.989 -0.78 7
1.907 -1.227 -1.912 10
2.873 -1.164 -2.726 9
3.104 -0.928 -3.121 8
2.784 -0.656 -3.148 8
2.505 -0.59 -2.833 9
1.899 -0.418 -2.678 8
1.026 -0.238 -2.214 9
0.155 -0.037 -1.469 8
-0.324 -0.079 -0.83 8
-0.322 -0.319 -0.504 9
-0.29 -0.287 -0.454 8
-0.186 -0.42 0.028 7
-0.1 -0.464 0.4 10
0.288 -0.545 0.083 8
0.805 -0.685 -0.491 9
1.161 -0.924 -0.947 8
1.374 -1.189 -1.32 8
1.236 -1.07 -1.188 9
1.336 -1.283 -1.415 8
1.28 -1.487 -1.36 9
1.072 -1.687 -0.839 8
0.711 -1.613 -0.328 8
0.363 -1.17 -0.456 9
0.327 -1.053 -0.41 7
0.228 -0.857 -0.709 10
0.363 -1.033 -0.842 8
0.504 -1.11 -0.851 8
0.564 -1.072 -0.889 9
0.657 -0.981 -1.099 8
0.756 -0.855 -1.295 9
0.776 -0.659 -1.241 8
0.699 -0.593 -1.117 8
0.657 -0.298 -0.898 9
0.591 0.035 -0.729 8
0.53 0.292 -0.679 8
0.45 0.425 -0.58 7
0.314 0.535 -0.477 10
0.283 0.481 -0.429 9
0.165 0.59 -0.485 8
0.151 0.54 -0.601 8
0.234 0.375 -0.586 9
0.314 0.24 -0.385 8
0.366 0.157 -0.194 9
0.417 0.175 -0.083 8
0.375 0.157 -0.075 8
0.388 0.201 0.021 9
0.344 0.206 0.12 8
0.286 0.273 0.191 7
0.254 0.292 0.157 10
0.254 0.243 0.063 8
0.22 0.336 0.014 9
0.198 0.303 0.013 8
0.124 0.509 0.066 9
0.058 0.644 0.229 8
-0.048 0.715 0.527 8
-0.277 0.9 0.741 9
-0.493 1.128 0.665 8
-0.443 1.179 0.46 9
-0.434 1.061 0.414 8
-0.305 1.01 0.231 7
-0.216 0.987 0.119 10
-0.149 0.986 0.137 8
-0.113 0.924 0.381 8
-0.078 0.792 0.801 9
-0.07 0.713 0.721 8
-0.076 0.578 1.117 9
-0.257 0.577 1.344 8
-0.494 0.698 1.338 8
-0.621 0.812 1.057 9
-0.672 0.948 0.642 8
-0.691 1.114 0.186 9
-0.622 1.002 0.167 6
-0.611 1.126 -0.294 10
-0.535 1.125 -0.554 9
-0.428 0.976 -0.499 8
-0.356 0.792 -0.201 9
-0.33 0.66 0.146 8
-0.336 0.583 0.38 8
-0.302 0.524 0.342 9
-0.348 0.538 0.375 8
-0.404 0.597 0.236 9
-0.421 0.628 -0.024 8
-0.431 0.639 -0.32 8
-0.388 0.575 -0.288 7
-0.415 0.589 -0.557 10
-0.462 0.53 -0.502 8
-0.557 0.585 -0.333 9
-0.626 0.545 -0.04 8
-0.61 0.478 0.2 9
-0.548 0.395 0.31 8
-0.466 0.324 0.35 8
-0.419 0.291 0.315 9
-0.341 0.233 0.317 8
-0.322 0.189 0.288 9
-0.38 0.184 0.258 8
-0.436 0.211 0.223 7
-0.475 0.224 0.204 10
-0.536 0.226 0.271 8
-0.483 0.203 0.244 9
-0.491 0.18 0.298 8
-0.33 0.05 0.222 8
-0.043 -0.143 0.117 9
0.233 -0.292 0.076 8
0.408 -0.377 0.096 9
0.431 -0.4 0.176 8
0.388 -0.36 0.158 8
0.342 -0.321 0.384 9
0.301 -0.308 0.685 6
0.235 -0.279 0.842 11
0.132 -0.221 0.841 8
0.049 -0.15 0.748 8
0.044 -0.135 0.673 9
-0.026 0.017 0.465 8
-0.108 0.16 0.194 9
-0.171 0.252 -0.031 8
-0.181 0.292 -0.209 8
-0.065 0.273 -0.318 9
0.08 0.227 -0.354 8
0.072 0.204 -0.319 8
0.105 0.187 -0.315 7
0.03 0.205 -0.288 10
-0.051 0.199 -0.224 9
-0.103 0.165 -0.212 8
-0.126 0.146 -0.346 8
-0.129 0.118 -0.49 9
-0.116 0.106 -0.441 8
-0.104 0.048 -0.426 9
-0.085 -0.04 -0.313 8
-0.097 -0.122 -0.256 8
-0.129 -0.196 -0.263 9
-0.155 -0.195 -0.188 8
-0.139 -0.175 -0.169 7
-0.157 -0.139 -0.063 10
-0.128 -0.16 0.013 8
-0.09 -0.19 0.181 9
-0.074 -0.225 0.442 8
-0.035 -0.221 0.652 9
0.011 -0.185 0.745 8
0.009 -0.166 0.67 8
0.036 -0.105 0.674 9
0.077 -0.015 0.574 8
0.114 0.033 0.473 8
0.056 0.058 0.457 9
# end
#Thu Feb 26 20:42:18 GMT+08:00 20150
