# Supplementary material for: Abnormal Gait Behavior Detection for Elderly Based on Enhanced Wigner-Ville Analysis and Cloud Incremental SVM Learning
Source: Hindawi journal article supplement (doi:10.1155/2016/5869238), 2016-01-01
Supplement: f1 [file 5869238.f1.zip › Supplementary Materials/Original Data/Leftward fall With recovery/original__146.txt]

# Accelerometer Values
# filename:  original__146.txt
# Saving start time: Thu Feb 26 20:42:21 GMT+08:00 2015

# sensor resolution: 0.0095825195m/s^2
#Sensorvendor: KIONIX, name: KX023 Accelerometer, type: 1,version : 1, range 39.240005

# X value, Y value, Z value, time diff in ms
0.027 0.009 0.013 8
0.044 0.004 -0.04 8
0.04 0.008 -0.087 9
0.036 0.007 -0.078 8
0.035 0.011 -0.168 9
0.068 0.003 -0.268 6
0.12 -0.008 -0.287 10
0.155 -0.014 -0.26 9
0.157 -0.012 -0.272 8
0.143 -0.009 -0.309 9
0.128 -0.008 -0.278 8
0.128 -0.013 -0.279 8
0.125 -0.03 -0.214 9
0.098 -0.033 -0.091 8
0.068 -0.033 0.028 9
0.068 -0.039 0.101 8
0.087 -0.029 0.134 8
0.078 -0.026 0.12 7
0.124 -0.034 0.115 10
0.196 -0.052 0.087 8
0.261 -0.052 0.047 9
0.317 -0.049 -0.013 8
0.325 -0.031 -0.095 9
0.293 -0.002 -0.135 8
0.263 -0.002 -0.122 8
0.249 0.01 -0.088 9
0.298 -0.006 -0.03 8
0.346 -0.039 0.032 9
0.369 -0.078 0.089 8
0.332 -0.07 0.08 7
0.354 -0.122 0.111 10
0.367 -0.208 0.112 8
0.387 -0.299 0.113 9
0.408 -0.386 0.083 8
0.436 -0.497 -0.026 8
0.559 -0.572 -0.144 9
0.759 -0.619 -0.192 8
0.683 -0.557 -0.173 9
0.847 -0.59 -0.17 8
0.885 -0.492 -0.201 8
0.81 -0.427 -0.268 9
0.623 -0.331 -0.319 6
0.337 -0.161 -0.358 10
0.086 -0.08 -0.375 9
0.078 -0.072 -0.338 8
-0.09 -0.144 -0.307 9
-0.246 -0.347 -0.105 8
-0.371 -0.5 0.194 8
-0.434 -0.662 0.357 9
-0.418 -0.851 0.374 8
-0.325 -1.019 0.345 9
-0.292 -0.917 0.311 8
-0.153 -1.056 0.221 8
-0.016 -1.117 -0.058 7
0.04 -1.092 -0.412 10
0.037 -0.985 -0.602 9
0.033 -0.834 -0.677 8
0.03 -0.751 -0.609 8
0.12 -0.628 -0.767 9
0.312 -0.563 -1.035 8
0.484 -0.526 -1.325 9
0.491 -0.496 -1.552 8
0.293 -0.467 -1.533 8
0.057 -0.454 -1.266 9
0.051 -0.408 -1.14 8
-0.137 -0.456 -0.873 7
-0.255 -0.512 -0.685 10
-0.237 -0.574 -0.562 8
-0.068 -0.744 -0.524 9
0.221 -0.944 -0.735 8
0.449 -1.105 -1.09 9
0.404 -0.995 -0.981 8
0.466 -1.1 -1.173 8
0.416 -1.223 -1.217 9
0.238 -1.397 -1.175 8
0.09 -1.462 -1.053 8
0.093 -1.463 -0.933 9
0.083 -1.317 -0.84 7
0.16 -1.326 -0.722 10
0.304 -1.277 -0.538 8
0.464 -1.207 -0.452 8
0.59 -1.11 -0.512 9
0.647 -0.963 -0.625 8
0.611 -0.802 -0.856 9
0.55 -0.722 -0.771 8
0.403 -0.577 -1.022 8
0.073 -0.47 -1.017 9
-0.358 -0.386 -0.724 8
-0.734 -0.29 -0.386 9
-0.983 -0.174 -0.177 6
-1.096 -0.03 -0.087 10
-0.986 -0.027 -0.078 9
-0.997 0.116 -0.044 8
-0.908 0.203 -0.046 9
-0.816 0.335 -0.072 8
-0.864 0.585 -0.061 8
-0.971 0.936 -0.016 9
-1.113 1.24 0.1 8
-1.002 1.116 0.09 8
-1.212 1.345 0.391 9
-1.34 1.606 0.77 8
-1.532 1.88 1.181 7
-1.871 2.222 1.692 10
-2.228 2.469 2.002 8
-2.005 2.222 1.802 9
-2.322 2.335 1.876 8
-2.543 2.498 1.963 9
-2.723 2.65 2.12 8
-2.811 2.642 2.417 8
-2.79 2.497 2.981 9
-2.823 2.344 3.581 8
-2.54 2.109 3.223 9
-2.73 2.132 3.568 8
-2.998 2.28 3.535 7
-3.264 2.487 3.266 10
-3.52 2.635 3.037 8
-3.671 2.455 2.934 9
-3.541 2.002 2.896 8
-3.187 1.801 2.606 8
-2.808 1.22 2.597 9
-2.162 0.504 2.467 8
-1.278 -0.177 2.151 9
-0.374 -0.627 1.691 8
0.209 -0.661 1.14 8
0.305 -0.032 0.548 9
0.275 -0.028 0.494 6
-0.795 0.852 0.117 10
-3.129 1.23 0.847 9
-5.614 1.011 3.04 8
-7.288 0.505 5.548 9
-7.434 0.111 6.746 8
-6.691 0.1 6.072 8
-5.251 -0.055 4.959 9
-2.791 -0.193 2.14 8
-0.287 -0.345 -0.911 9
1.502 -0.28 -3.271 8
1.921 -0.275 -4.126 8
1.729 -0.247 -3.713 7
0.769 -0.634 -2.633 10
-0.67 -1.479 -0.35 9
-1.726 -2.59 1.979 8
-1.996 -3.563 3.645 8
-1.526 -4.207 3.94 9
-0.799 -4.269 2.838 8
-0.292 -3.779 1.167 9
-0.262 -3.401 1.05 8
-0.097 -2.705 -0.552 8
-0.332 -2.097 -1.754 9
-0.75 -1.759 -1.98 8
-0.899 -1.892 -1.255 7
-0.639 -2.439 -0.461 10
-0.091 -2.985 -0.196 8
-0.082 -2.687 -0.177 9
0.6 -3.039 -0.484 8
1.247 -3.132 -1.285 8
1.726 -2.928 -2.293 9
2.007 -2.459 -3.261 8
2.298 -1.993 -4.112 9
2.068 -1.794 -3.701 8
2.451 -1.449 -4.383 8
2.586 -1.158 -4.676 9
2.417 -0.805 -4.331 7
1.997 -0.442 -3.49 10
1.428 -0.206 -2.454 8
0.981 -0.071 -1.377 8
0.882 -0.064 -1.239 9
0.728 -0.1 -0.478 8
0.872 -0.173 -0.25 9
1.108 -0.023 -0.597 8
1.24 0.331 -1.234 8
1.25 0.796 -1.72 9
1.183 1.208 -1.892 8
1.065 1.087 -1.703 9
0.929 1.337 -1.58 6
0.564 1.491 -1.131 10
0.047 1.538 -0.461 9
-0.427 1.384 0.182 8
-0.808 1.113 0.714 8
-0.727 1.002 0.643 9
-0.791 0.704 1.067 8
-0.492 0.318 1.167 9
0.029 0.002 0.85 8
0.55 -0.171 0.309 8
0.837 -0.225 -0.129 9
0.785 -0.161 -0.22 8
0.706 -0.145 -0.198 7
0.317 -0.055 0.107 10
-0.135 -0.136 0.704 8
-0.36 -0.419 1.363 9
-0.353 -0.793 1.86 8
-0.155 -1.143 2.072 9
0.23 -1.312 1.932 8
0.207 -1.181 1.739 8
0.594 -1.186 1.236 9
0.901 -1.066 0.512 8
1.196 -0.877 -0.281 9
1.407 -0.663 -0.98 8
1.267 -0.597 -0.882 7
1.36 -0.244 -1.562 10
1.224 -0.22 -1.406 8
0.941 -0.13 -1.041 9
0.606 -0.073 -0.58 8
0.445 -0.039 -0.294 8
0.542 -0.116 -0.351 9
0.705 -0.148 -0.652 8
0.635 -0.133 -0.586 8
0.723 -0.025 -0.966 9
0.739 0.142 -1.29 8
0.713 0.275 -1.447 9
0.651 0.349 -1.509 6
0.565 0.459 -1.487 10
0.425 0.647 -1.325 9
0.382 0.582 -1.192 8
0.176 0.806 -0.944 9
0.016 0.972 -0.618 8
-0.087 0.996 -0.258 8
-0.189 0.883 0.027 9
-0.304 0.781 0.184 8
-0.467 0.75 0.13 9
-0.421 0.675 0.117 8
-0.707 0.69 0.07 8
-1.05 0.733 0.152 7
-1.241 0.763 0.193 10
-1.223 0.834 0.217 8
-1.05 0.91 0.261 9
-0.945 0.819 0.235 8
-0.655 0.797 0.299 9
-0.314 0.731 0.431 8
-0.093 0.735 0.613 8
-0.005 0.797 0.717 9
0.063 0.855 0.699 8
0.206 0.865 0.564 9
0.185 0.779 0.507 8
0.462 0.757 0.256 7
0.754 0.722 0.0 10
0.963 0.717 -0.134 8
1.204 0.714 -0.104 9
1.511 0.637 0.096 8
1.818 0.527 0.352 8
1.636 0.474 0.317 9
1.72 0.502 0.537 8
1.327 0.787 0.762 9
0.668 1.276 1.091 8
-0.044 1.74 1.471 8
-0.585 2.028 1.82 9
-0.527 1.825 1.638 7
-0.714 1.893 1.898 10
-0.565 1.738 1.965 8
-0.248 1.489 2.052 8
0.003 1.218 2.314 9
0.153 0.975 2.628 8
0.231 0.782 2.816 9
0.208 0.704 2.534 8
0.227 0.605 2.527 8
0.23 0.559 2.405 9
0.306 0.41 2.294 8
0.352 0.177 2.321 8
0.235 -0.021 2.697 7
-0.092 -0.112 3.188 10
-0.082 -0.101 2.869 9
-0.489 -0.005 3.145 8
-0.717 0.088 3.174 8
-0.708 0.063 2.93 9
-0.399 0.006 2.378 8
0.074 -0.178 1.724 9
0.59 -0.467 1.085 8
0.531 -0.421 0.977 8
1.158 -0.71 0.246 9
1.638 -0.934 -0.502 8
1.558 -0.976 -0.8 7
1.061 -0.881 -0.666 10
0.482 -0.705 -0.539 8
0.434 -0.634 -0.485 9
-0.063 -0.325 -0.371 8
-0.27 -0.066 -0.349 9
-0.026 -0.033 -0.687 8
0.633 -0.11 -1.335 8
1.46 -0.141 -2.095 9
2.262 -0.063 -2.795 8
2.036 -0.057 -2.515 8
2.712 0.015 -2.989 9
2.992 -0.012 -3.059 7
2.594 0.009 -2.481 10
1.629 0.197 -1.326 8
0.327 0.467 0.383 8
-0.459 0.579 1.088 9
-0.413 0.521 0.98 8
-0.091 0.524 0.005 9
0.661 0.391 -1.134 8
1.349 0.141 -1.991 8
1.835 0.019 -2.578 9
1.909 -0.025 -2.829 8
1.703 -0.076 -2.599 9
1.533 -0.068 -2.339 6
1.121 -0.147 -1.686 10
0.654 -0.34 -0.847 9
0.526 -0.673 -0.29 8
0.842 -0.915 -0.415 9
1.362 -0.975 -1.087 8
1.226 -0.877 -0.978 8
1.6 -0.886 -1.578 9
1.731 -0.869 -1.808 8
1.669 -0.86 -1.721 8
1.557 -0.788 -1.573 9
1.442 -0.588 -1.724 8
1.298 -0.529 -1.552 7
1.187 -0.362 -1.811 10
1.144 -0.301 -1.889 8
1.208 -0.351 -1.815 9
1.223 -0.498 -1.634 8
0.959 -0.539 -1.131 9
0.431 -0.436 -0.345 8
-0.095 -0.364 0.282 8
-0.086 -0.328 0.254 9
-0.333 -0.395 0.648 8
-0.186 -0.65 0.862 9
0.231 -1.072 0.868 8
0.656 -1.435 0.677 7
0.932 -1.561 0.264 10
1.121 -1.545 -0.287 8
1.009 -1.39 -0.258 9
1.083 -1.348 -0.621 8
0.94 -1.23 -0.711 8
0.532 -0.898 -0.754 9
0.087 -0.438 -0.805 8
-0.085 -0.137 -0.918 9
-0.076 -0.123 -0.826 8
0.022 -0.029 -0.962 8
0.245 -0.007 -1.051 9
0.47 -0.054 -1.189 6
0.65 -0.216 -1.24 11
0.719 -0.448 -1.075 8
0.705 -0.602 -0.795 8
0.635 -0.542 -0.715 9
0.597 -0.561 -0.449 8
0.52 -0.446 -0.286 8
0.389 -0.22 -0.286 9
0.248 0.077 -0.394 8
0.059 0.427 -0.584 9
-0.242 0.829 -0.84 8
-0.218 0.746 -0.756 8
-0.463 1.062 -0.964 7
-0.478 1.138 -0.997 10
-0.228 1.035 -0.862 9
0.177 0.713 -0.539 8
0.564 0.277 -0.167 8
0.508 0.249 -0.151 9
0.837 -0.163 0.146 8
1.022 -0.388 0.417 9
0.947 -0.304 0.542 8
0.705 -0.089 0.436 8
0.345 0.265 0.163 9
-0.093 0.663 -0.178 8
-0.084 0.596 -0.16 7
-0.336 0.839 -0.462 10
-0.339 0.945 -0.676 8
-0.232 0.953 -0.769 9
-0.099 0.919 -0.638 8
-0.008 0.866 -0.279 8
-0.011 0.823 0.095 9
-0.01 0.741 0.085 8
-0.07 0.839 0.355 9
-0.159 1.006 0.559 8
-0.305 1.13 0.623 8
-0.464 1.286 0.58 9
-0.418 1.157 0.522 7
-0.445 1.357 0.219 10
-0.4 1.222 0.197 8
-0.23 1.142 -0.05 8
-0.089 1.056 -0.133 9
-0.01 0.932 0.048 8
0.022 0.826 0.393 9
0.052 0.763 0.729 8
0.047 0.686 0.656 8
0.099 0.62 0.865 9
0.107 0.564 1.089 8
-0.009 0.548 1.211 9
-0.214 0.582 0.962 6
-0.412 0.683 0.465 10
-0.573 0.783 -0.006 9
-0.516 0.705 -0.006 8
-0.681 0.767 -0.247 9
-0.811 0.756 -0.12 8
-0.8 0.639 0.232 8
-0.606 0.442 0.623 9
-0.323 0.239 0.937 8
-0.129 0.097 1.028 8
-0.116 0.087 0.925 9
-0.093 0.046 0.887 8
-0.143 0.096 0.836 7
-0.217 0.142 0.778 10
-0.284 0.122 0.802 8
-0.296 0.094 0.848 9
-0.266 0.085 0.716 8
-0.209 0.076 0.644 9
-0.145 0.004 0.378 8
-0.21 0.003 0.087 8
-0.384 0.067 -0.119 9
-0.557 0.115 -0.094 8
-0.657 0.1 0.111 9
-0.592 0.09 0.099 8
-0.585 0.047 0.32 7
-0.485 0.005 0.465 10
-0.359 -0.032 0.5 8
-0.26 -0.049 0.438 9
-0.207 -0.019 0.228 8
-0.166 0.0 -0.125 8
-0.149 0.0 -0.113 9
-0.042 0.051 -0.447 8
0.131 0.075 -0.612 9
0.263 0.016 -0.559 8
0.258 -0.004 -0.279 8
0.161 -0.011 0.134 9
0.145 -0.01 0.12 6
0.064 -0.05 0.475 10
-0.025 -0.071 0.663 9
-0.146 -0.032 0.691 8
-0.225 0.037 0.569 9
-0.235 0.109 0.358 8
-0.23 0.172 0.115 8
-0.207 0.155 0.103 9
# end
#Thu Feb 26 20:42:25 GMT+08:00 2015.
