# Supplementary material for: Abnormal Gait Behavior Detection for Elderly Based on Enhanced Wigner-Ville Analysis and Cloud Incremental SVM Learning
Source: Hindawi journal article supplement (doi:10.1155/2016/5869238), 2016-01-01
Supplement: f1 [file 5869238.f1.zip › Supplementary Materials/Original Data/Leftward fall With recovery/original__147.txt]

# Accelerometer Values
# filename:  original__147.txt
# Saving start time: Thu Feb 26 20:42:26 GMT+08:00 2015

# sensor resolution: 0.0095825195m/s^2
#Sensorvendor: KIONIX, name: KX023 Accelerometer, type: 1,version : 1, range 39.240005

# X value, Y value, Z value, time diff in ms
0.041 0.04 -0.174 9
0.101 0.048 -0.401 8
0.138 0.058 -0.497 8
0.168 0.05 -0.439 9
0.19 0.024 -0.337 8
0.171 0.022 -0.303 9
0.169 -0.002 -0.191 8
0.121 -0.018 -0.033 8
0.026 -0.014 0.129 9
-0.091 -0.003 0.248 8
-0.082 -0.003 0.223 7
-0.184 -0.01 0.307 10
-0.219 -0.016 0.276 8
-0.167 -0.016 0.291 9
-0.086 -0.024 0.198 8
-0.028 -0.022 0.038 8
0.004 -0.001 -0.184 9
0.026 0.026 -0.384 8
0.024 0.024 -0.346 9
0.031 0.041 -0.432 8
0.009 0.045 -0.381 8
-0.039 0.056 -0.244 9
-0.075 0.067 -0.064 7
-0.048 0.039 0.098 10
-0.016 -0.009 0.194 8
-0.015 -0.008 0.175 8
-0.025 -0.031 0.227 9
-0.056 -0.041 0.242 8
-0.073 -0.05 0.213 9
-0.044 -0.053 0.127 8
0.012 -0.062 0.031 8
0.047 -0.069 0.002 9
0.042 -0.062 0.002 8
0.014 -0.049 -0.008 9
-0.024 -0.016 -0.068 6
-0.001 -0.003 -0.13 10
0.044 -0.015 -0.128 9
0.044 -0.001 -0.038 8
0.04 0.016 0.098 9
0.012 0.014 0.088 8
0.024 0.003 0.18 8
0.062 -0.015 0.186 9
0.086 -0.026 0.118 8
0.101 -0.027 0.004 8
0.11 -0.033 -0.108 9
0.099 -0.029 -0.097 8
0.095 -0.022 -0.173 7
0.069 0.001 -0.197 10
0.048 0.013 -0.174 8
0.037 0.024 -0.106 9
0.007 0.039 0.023 8
-0.036 0.05 0.155 9
-0.032 0.045 0.139 8
-0.062 0.039 0.209 8
-0.045 0.01 0.238 9
0.0 -0.032 0.247 8
0.032 -0.062 0.24 9
0.055 -0.074 0.213 8
0.05 -0.066 0.191 7
0.074 -0.065 0.131 10
0.08 -0.041 0.024 8
0.081 -0.015 -0.102 9
0.087 -0.001 -0.188 8
0.103 0.013 -0.209 8
0.137 0.016 -0.172 9
0.123 0.002 -0.073 8
0.111 0.001 -0.065 9
0.236 -0.017 0.064 8
0.287 -0.036 0.171 8
0.357 -0.066 0.218 9
0.47 -0.122 0.218 6
0.596 -0.175 0.196 10
0.536 -0.157 0.176 9
0.627 -0.193 0.138 8
0.709 -0.252 0.081 9
0.87 -0.315 0.016 8
1.086 -0.351 0.019 8
1.236 -0.375 0.07 9
1.278 -0.427 0.097 8
1.15 -0.384 0.087 9
1.162 -0.492 0.107 8
1.173 -0.628 0.104 8
1.167 -0.714 -0.007 7
1.1 -0.691 -0.22 10
0.902 -0.475 -0.479 9
0.66 -0.258 -0.684 8
0.594 -0.232 -0.616 8
0.428 -0.251 -0.691 9
0.287 -0.338 -0.72 8
0.182 -0.421 -0.745 9
0.138 -0.578 -0.727 8
0.121 -0.798 -0.637 8
0.109 -0.719 -0.574 9
0.09 -0.871 -0.516 8
0.112 -0.888 -0.423 7
0.175 -0.837 -0.573 10
0.221 -0.765 -0.809 8
0.208 -0.769 -1.014 9
0.105 -0.761 -1.203 8
0.094 -0.685 -1.082 8
-0.174 -0.539 -1.082 9
-0.519 -0.36 -0.879 8
-0.758 -0.27 -0.689 9
-0.859 -0.276 -0.575 8
-0.808 -0.331 -0.579 8
-0.659 -0.372 -0.726 9
-0.593 -0.335 -0.653 6
-0.371 -0.353 -0.92 11
-0.074 -0.392 -1.224 8
0.123 -0.45 -1.531 8
0.087 -0.474 -1.688 9
-0.106 -0.462 -1.575 8
-0.332 -0.438 -1.27 9
-0.299 -0.394 -1.143 8
-0.513 -0.396 -0.836 8
-0.668 -0.46 -0.641 9
-0.684 -0.551 -0.496 8
-0.545 -0.69 -0.384 9
-0.49 -0.621 -0.345 6
-0.263 -0.786 -0.31 10
-0.055 -0.889 -0.347 9
0.04 -0.956 -0.347 8
0.029 -1.025 -0.258 8
-0.13 -1.126 0.019 9
-0.41 -1.216 0.541 8
-0.63 -1.313 1.086 9
-0.567 -1.182 0.977 8
-0.668 -1.277 1.324 8
-0.63 -1.331 1.422 9
-0.438 -1.437 1.348 8
-0.142 -1.595 1.136 7
0.102 -1.696 0.895 10
0.133 -1.666 0.736 8
0.119 -1.499 0.663 9
-0.064 -1.276 0.614 8
-0.34 -0.879 0.574 9
-0.589 -0.4 0.482 8
-0.835 0.196 0.413 8
-1.093 0.803 0.441 9
-1.296 1.285 0.578 8
-1.167 1.156 0.52 8
-1.359 1.551 0.653 9
-1.53 1.911 0.765 7
-1.616 2.223 0.97 10
-1.626 2.468 1.167 8
-1.57 2.629 1.262 8
-1.413 2.366 1.135 9
-1.21 2.423 1.135 8
-0.889 2.338 1.038 9
-0.715 2.214 0.882 8
-0.891 2.134 0.887 8
-1.414 2.057 1.421 9
-2.014 1.847 2.369 8
-1.812 1.662 2.132 9
-2.137 1.403 3.008 6
-1.896 1.222 3.358 10
-1.159 1.096 3.08 9
-0.447 1.062 2.544 8
-0.314 1.216 2.248 9
-0.985 1.603 2.438 8
-0.886 1.442 2.194 8
-1.887 1.807 2.794 9
-2.513 1.799 3.609 8
-2.467 1.423 4.241 9
-1.842 0.884 4.117 8
-1.001 0.406 3.325 8
-0.901 0.365 2.992 7
-0.074 -0.026 1.991 10
0.604 -0.343 0.9 9
0.99 -0.566 0.0 8
1.089 -0.782 -0.521 8
1.026 -0.937 -0.804 9
0.702 -0.958 -0.952 8
0.631 -0.862 -0.856 8
0.053 -0.703 -0.919 9
-0.528 -0.409 -1.009 8
-0.941 -0.111 -1.147 9
-1.18 0.248 -1.332 8
-1.361 0.853 -1.449 7
-2.052 1.486 -1.35 10
-1.846 1.337 -1.215 8
-3.213 1.799 -0.665 9
-4.618 2.174 0.595 8
-5.66 2.341 2.11 8
-5.884 2.213 3.178 9
-5.094 1.744 3.373 8
-3.531 1.0 2.537 9
-3.178 0.9 2.283 8
-1.292 -0.077 0.709 8
0.409 -1.108 -1.132 9
1.427 -1.735 -2.818 6
1.442 -1.931 -3.658 11
0.637 -2.043 -3.16 8
0.573 -1.838 -2.844 8
-0.526 -1.979 -1.558 9
-1.324 -2.096 -0.475 8
-1.434 -2.181 0.04 8
-0.968 -2.272 0.133 9
-0.425 -2.335 -0.105 8
-0.286 -2.095 -0.486 9
-0.258 -1.885 -0.437 8
-0.497 -1.504 -0.679 8
-0.913 -1.137 -0.683 7
-1.39 -0.825 -0.465 10
-1.753 -0.723 -0.032 9
-1.716 -0.843 0.284 8
-1.127 -1.195 0.146 8
-1.014 -1.076 0.131 9
-0.035 -1.678 -0.48 8
1.053 -2.258 -1.294 9
1.855 -2.593 -1.833 8
2.092 -2.675 -2.088 8
1.802 -2.442 -2.302 9
1.622 -2.197 -2.072 8
1.064 -1.734 -2.237 7
0.588 -1.197 -2.268 10
0.481 -0.816 -2.286 8
0.731 -0.69 -2.302 9
1.112 -0.731 -2.278 8
1.393 -0.786 -2.148 8
1.253 -0.707 -1.933 9
1.351 -0.697 -1.582 8
1.299 -0.657 -1.022 9
1.148 -0.61 -0.398 8
0.921 -0.552 0.076 8
0.69 -0.436 0.362 9
0.621 -0.393 0.326 7
0.457 -0.142 0.411 10
0.345 0.204 0.331 8
0.27 0.495 0.278 8
0.241 0.644 0.27 9
0.284 0.669 0.399 8
0.424 0.561 0.663 9
0.641 0.348 0.847 8
0.577 0.314 0.762 8
0.768 0.174 0.802 9
0.825 0.213 0.773 8
0.82 0.28 0.739 9
0.829 0.228 0.62 6
0.879 0.118 0.421 10
0.791 0.106 0.379 9
0.852 0.0 0.228 8
0.813 -0.089 0.15 9
0.664 -0.116 0.206 8
0.291 -0.009 0.563 8
-0.185 0.133 1.145 9
-0.455 0.104 1.641 8
-0.41 0.093 1.477 9
-0.421 -0.125 1.724 8
-0.199 -0.397 1.618 8
0.102 -0.548 1.155 7
0.32 -0.573 0.52 10
0.431 -0.578 -0.073 8
0.483 -0.573 -0.466 9
0.435 -0.516 -0.419 8
0.419 -0.492 -0.479 9
0.302 -0.46 -0.205 8
0.071 -0.478 0.225 8
-0.225 -0.528 0.566 9
-0.434 -0.561 0.638 8
-0.391 -0.505 0.574 9
-0.392 -0.479 0.344 8
-0.263 -0.37 -0.048 7
-0.207 -0.271 -0.405 10
-0.292 -0.199 -0.61 8
-0.437 -0.148 -0.607 9
-0.598 -0.149 -0.471 8
-0.538 -0.134 -0.424 8
-0.72 -0.164 -0.287 9
-0.926 -0.141 -0.236 8
-1.122 -0.07 -0.281 9
-1.224 0.001 -0.379 8
-1.233 0.043 -0.555 8
-1.221 0.134 -0.795 9
-1.099 0.121 -0.715 6
-1.119 0.281 -0.886 10
-1.147 0.376 -0.913 9
-1.173 0.32 -0.87 8
-1.109 0.143 -0.817 9
-0.945 -0.007 -0.804 8
-0.831 -0.067 -0.802 8
-0.748 -0.061 -0.721 9
-0.737 0.005 -0.708 8
-0.698 0.218 -0.675 9
-0.63 0.516 -0.565 8
-0.597 0.787 -0.429 8
-0.537 0.709 -0.386 7
-0.478 0.954 -0.304 10
-0.422 1.189 -0.231 9
-0.469 1.332 -0.122 8
-0.631 1.358 0.144 8
-0.926 1.346 0.5 9
-1.22 1.406 0.735 8
-1.33 1.436 0.882 9
-1.197 1.292 0.793 8
-1.065 1.138 0.907 8
-0.627 0.896 0.943 9
-0.02 0.716 0.875 8
0.493 0.607 0.767 7
0.933 0.528 0.686 10
1.406 0.461 0.561 8
1.265 0.415 0.505 9
1.578 0.367 0.322 8
1.548 0.443 0.409 8
1.203 0.622 0.921 9
0.842 0.769 1.433 8
0.801 0.891 1.65 9
0.721 0.802 1.485 8
0.981 0.914 1.401 8
1.422 1.068 0.904 9
1.921 1.362 0.162 7
2.246 1.764 -0.451 10
2.349 2.122 -0.748 8
2.437 2.272 -0.777 8
2.193 2.045 -0.7 9
2.389 1.991 -0.604 8
2.349 1.807 -0.28 9
1.783 1.635 0.572 8
1.066 1.443 1.813 8
0.705 1.22 2.897 9
0.755 1.061 3.315 8
0.68 0.955 2.983 9
1.07 0.833 2.777 6
1.578 0.74 2.274 10
2.027 0.704 1.626 9
2.407 0.76 0.965 8
2.688 0.72 0.436 8
2.419 0.648 0.392 9
2.533 0.382 0.353 8
2.084 0.12 0.138 9
0.975 0.16 0.582 8
-0.267 0.266 1.124 8
-1.069 0.177 1.403 9
-1.259 -0.052 1.423 8
-1.133 -0.047 1.281 7
-0.681 -0.468 1.046 10
0.259 -0.994 0.606 8
1.358 -1.403 0.132 9
2.362 -1.572 -0.355 8
3.119 -1.533 -0.946 9
3.356 -1.338 -1.585 8
3.02 -1.204 -1.426 8
2.354 -0.877 -1.522 9
0.954 -0.465 -0.889 8
-0.49 -0.128 -0.142 9
-1.3 -0.066 0.253 8
-1.17 -0.059 0.228 7
-0.376 -0.542 -0.469 10
-0.338 -0.488 -0.422 8
0.694 -0.761 -1.126 9
1.676 -0.998 -1.813 8
2.455 -1.099 -2.389 8
2.961 -1.105 -2.852 9
3.107 -1.087 -3.194 8
2.797 -0.978 -2.875 8
2.421 -0.894 -2.996 9
1.467 -0.606 -2.653 8
0.319 -0.217 -1.976 9
-0.48 -0.017 -1.329 6
-0.729 -0.129 -0.954 10
-0.481 -0.405 -0.947 9
-0.433 -0.364 -0.852 8
0.191 -0.61 -1.156 9
0.966 -0.895 -1.496 8
1.63 -1.221 -1.635 8
1.907 -1.516 -1.59 9
1.691 -1.633 -1.323 8
1.178 -1.49 -0.873 9
1.061 -1.341 -0.786 8
0.539 -1.212 -0.412 8
0.021 -1.146 -0.218 7
-0.529 -0.957 -0.13 10
-0.975 -0.731 -0.179 9
-1.121 -0.66 -0.432 8
-0.941 -0.736 -0.719 8
-0.847 -0.662 -0.647 9
-0.55 -0.807 -0.788 8
-0.155 -0.926 -0.797 8
0.319 -1.023 -0.762 9
0.829 -1.071 -0.718 8
1.264 -1.047 -0.679 9
1.138 -0.942 -0.611 8
1.305 -0.9 -0.633 7
1.188 -0.753 -0.483 10
0.934 -0.576 -0.356 8
0.555 -0.245 -0.389 9
0.103 0.227 -0.357 8
-0.25 0.572 -0.345 8
-0.225 0.514 -0.31 9
-0.405 0.73 -0.378 8
-0.354 0.768 -0.6 9
-0.121 0.702 -0.925 8
0.131 0.671 -1.25 8
0.355 0.676 -1.468 9
0.32 0.608 -1.321 6
0.515 0.638 -1.246 11
0.586 0.653 -0.705 8
0.519 0.593 0.107 8
0.28 0.563 0.779 9
0.012 0.544 1.123 8
-0.093 0.47 1.173 9
-0.084 0.423 1.055 8
0.002 0.379 0.888 8
0.176 0.364 0.553 9
0.314 0.379 0.227 8
0.453 0.428 0.054 8
0.557 0.452 -0.028 7
0.584 0.459 -0.055 10
0.526 0.413 -0.049 9
0.356 0.47 0.067 8
-0.032 0.666 0.406 8
-0.427 0.909 0.747 9
-0.569 1.018 0.856 8
-0.44 0.981 0.695 9
-0.146 0.857 0.309 8
-0.131 0.771 0.278 8
0.226 0.672 -0.158 9
0.471 0.616 -0.533 8
0.568 0.594 -0.743 7
0.535 0.587 -0.657 10
0.348 0.576 -0.297 8
0.026 0.609 0.241 9
0.023 0.548 0.217 8
-0.263 0.598 0.721 9
-0.402 0.615 0.923 8
-0.432 0.573 0.825 8
-0.417 0.501 0.598 9
-0.405 0.459 0.425 8
-0.365 0.413 0.382 8
-0.495 0.445 0.392 9
-0.787 0.597 0.63 7
-1.098 0.805 0.967 10
-1.353 0.948 1.175 8
-1.518 0.984 1.242 8
-1.499 0.957 1.249 9
-1.349 0.861 1.124 8
-1.097 0.788 1.077 9
-0.741 0.664 0.988 8
-0.46 0.552 0.897 8
-0.24 0.48 0.784 9
0.03 0.398 0.62 8
0.317 0.277 0.407 9
0.285 0.249 0.366 6
0.495 0.166 0.128 10
0.626 0.125 -0.155 9
0.717 0.056 -0.377 8
0.687 0.01 -0.454 9
0.528 0.085 -0.451 8
0.475 0.076 -0.406 8
0.332 0.168 -0.381 9
0.264 0.156 -0.387 8
0.275 0.066 -0.432 9
0.342 -0.016 -0.574 8
0.407 -0.045 -0.832 8
0.366 -0.04 -0.749 7
0.366 -0.044 -0.963 10
0.289 -0.035 -1.025 9
0.134 -0.001 -0.996 8
-0.189 0.099 -0.834 8
-0.569 0.234 -0.533 9
-0.802 0.278 -0.227 8
-0.908 0.213 0.018 8
-0.817 0.191 0.016 9
-0.807 0.103 0.175 8
-0.665 0.0 0.225 9
-0.427 -0.119 0.175 8
-0.195 -0.205 0.035 7
-0.062 -0.226 -0.138 10
-0.026 -0.172 -0.243 8
-0.023 -0.155 -0.219 9
-0.074 -0.051 -0.183 8
-0.149 0.022 -0.008 8
-0.193 0.055 0.268 9
-0.235 0.111 0.618 8
-0.261 0.173 0.851 9
-0.235 0.156 0.766 8
-0.187 0.194 0.664 8
-0.05 0.209 0.342 9
0.105 0.202 0.03 6
0.17 0.197 -0.154 11
0.15 0.2 -0.181 8
0.123 0.188 -0.122 8
0.111 0.17 -0.11 9
0.101 0.136 -0.047 8
0.112 0.086 -0.025 9
0.104 0.048 -0.043 8
0.041 0.053 -0.119 8
-0.05 0.079 -0.181 9
-0.142 0.097 -0.152 8
-0.127 0.087 -0.137 8
-0.215 0.111 -0.065 7
-0.24 0.11 -0.002 10
-0.232 0.125 -0.013 9
-0.229 0.144 -0.141 8
-0.195 0.094 -0.265 8
-0.176 0.084 -0.239 9
-0.142 0.024 -0.257 8
-0.138 -0.014 -0.198 9
-0.167 -0.045 -0.071 8
-0.229 -0.061 0.06 8
-0.294 -0.05 0.132 9
-0.333 -0.056 0.15 8
-0.3 -0.05 0.135 7
-0.357 -0.08 0.137 10
-0.351 -0.092 0.267 8
-0.256 -0.076 0.326 9
-0.111 -0.091 0.205 8
0.046 -0.139 0.128 8
0.104 -0.119 0.135 9
0.093 -0.107 0.121 8
0.076 -0.052 0.15 9
0.068 -0.021 0.154 8
0.064 -0.002 0.242 8
0.022 0.025 0.438 9
0.02 0.022 0.394 7
-0.063 0.092 0.748 10
-0.057 0.083 0.673 8
-0.048 0.092 0.608 8
-0.041 0.099 0.395 9
-0.055 0.12 0.11 8
# end
#Thu Feb 26 20:42:31 GMT+08:00 20150
