# Supplementary material for: Abnormal Gait Behavior Detection for Elderly Based on Enhanced Wigner-Ville Analysis and Cloud Incremental SVM Learning
Source: Hindawi journal article supplement (doi:10.1155/2016/5869238), 2016-01-01
Supplement: f1 [file 5869238.f1.zip › Supplementary Materials/Original Data/Leftward fall With recovery/original__148.txt]

# Accelerometer Values
# filename:  original__148.txt
# Saving start time: Thu Feb 26 20:42:32 GMT+08:00 2015

# sensor resolution: 0.0095825195m/s^2
#Sensorvendor: KIONIX, name: KX023 Accelerometer, type: 1,version : 1, range 39.240005

# X value, Y value, Z value, time diff in ms
0.008 -0.1 0.076 9
0.008 -0.09 0.068 8
0.196 -0.114 -0.063 9
0.184 -0.111 -0.209 8
0.103 -0.074 -0.298 8
-0.011 -0.003 -0.306 9
-0.009 -0.003 -0.276 6
-0.103 0.063 -0.257 11
-0.134 0.095 -0.25 8
-0.087 0.081 -0.228 8
-0.01 0.032 -0.188 9
0.036 -0.005 -0.13 8
0.044 -0.02 -0.066 8
0.033 -0.02 -0.056 9
0.03 -0.018 -0.05 8
0.009 0.004 -0.066 9
-0.034 0.039 -0.069 8
-0.078 0.069 -0.077 8
-0.098 0.075 -0.083 7
-0.098 0.053 -0.083 10
-0.077 0.015 -0.093 9
-0.069 0.013 -0.084 8
-0.032 -0.019 -0.113 8
-0.005 -0.043 -0.141 9
0.013 -0.055 -0.155 8
0.038 -0.062 -0.125 9
0.029 -0.046 -0.075 8
0.026 -0.042 -0.067 8
-0.023 0.0 -0.055 9
-0.072 0.037 -0.064 8
-0.086 0.058 -0.046 7
-0.073 0.05 -0.004 10
-0.089 0.053 0.062 8
-0.126 0.078 0.106 9
-0.113 0.071 0.095 8
-0.084 0.06 0.077 9
0.012 0.007 0.036 8
0.078 -0.02 -0.024 8
0.1 -0.002 -0.092 9
0.118 -0.007 -0.123 8
0.131 -0.022 -0.115 8
0.118 -0.02 -0.104 9
0.102 -0.003 -0.015 7
0.064 0.028 0.156 10
0.039 0.015 0.289 8
0.029 -0.031 0.336 8
0.018 -0.062 0.327 9
0.016 -0.056 0.294 8
0.006 -0.073 0.248 9
0.014 -0.084 0.189 8
0.036 -0.093 0.138 8
0.05 -0.072 0.084 9
0.059 -0.035 0.006 8
0.087 -0.02 -0.045 9
0.078 -0.018 -0.04 6
0.1 -0.022 -0.047 10
0.09 -0.016 -0.057 9
0.071 -0.004 -0.067 8
0.067 -0.014 -0.075 9
0.072 -0.019 -0.071 8
0.078 -0.011 -0.037 8
0.07 -0.01 -0.033 9
0.08 0.004 0.003 8
0.105 0.015 0.008 9
0.142 0.011 -0.032 8
0.161 -0.008 -0.102 8
0.145 -0.007 -0.092 7
0.128 -0.033 -0.185 10
0.116 -0.03 -0.166 9
0.071 -0.028 -0.178 8
0.115 -0.029 -0.166 8
0.221 -0.04 -0.133 9
0.352 -0.047 -0.088 8
0.494 -0.046 -0.021 8
0.445 -0.041 -0.019 9
0.585 -0.057 0.018 8
0.745 -0.101 0.03 9
0.927 -0.162 0.078 8
1.065 -0.218 0.096 7
1.164 -0.261 0.083 10
1.211 -0.357 0.03 8
1.09 -0.322 0.027 9
1.083 -0.479 -0.122 8
1.046 -0.648 -0.308 8
0.968 -0.779 -0.386 9
0.852 -0.829 -0.288 8
0.617 -0.774 -0.149 9
0.196 -0.654 0.006 8
0.177 -0.588 0.005 8
-0.22 -0.433 0.202 9
-0.473 -0.258 0.264 6
-0.6 -0.151 0.144 11
-0.639 -0.108 -0.022 8
-0.664 -0.095 -0.215 8
-0.597 -0.085 -0.193 9
-0.617 -0.114 -0.381 8
-0.652 -0.204 -0.468 8
-0.704 -0.303 -0.481 9
-0.736 -0.369 -0.462 8
-0.726 -0.404 -0.429 9
-0.669 -0.426 -0.393 8
-0.602 -0.383 -0.354 8
-0.521 -0.427 -0.329 7
-0.42 -0.479 -0.377 10
-0.34 -0.489 -0.512 9
-0.276 -0.477 -0.7 8
-0.197 -0.459 -0.925 8
-0.092 -0.439 -1.189 9
-0.083 -0.395 -1.07 8
0.08 -0.44 -1.382 9
0.273 -0.523 -1.674 8
0.44 -0.611 -1.944 8
0.537 -0.688 -2.132 9
0.476 -0.715 -2.114 8
0.428 -0.644 -1.902 7
0.193 -0.597 -1.635 10
-0.059 -0.54 -1.284 8
-0.212 -0.541 -1.13 9
-0.241 -0.566 -1.166 8
-0.208 -0.616 -1.226 8
-0.188 -0.693 -1.238 9
-0.169 -0.624 -1.114 8
-0.167 -0.75 -1.067 9
-0.202 -0.895 -0.918 8
-0.291 -0.985 -0.639 8
-0.376 -1.028 -0.308 9
-0.428 -1.051 -0.046 7
-0.46 -1.044 0.119 10
-0.414 -0.939 0.107 8
-0.419 -0.939 0.217 8
-0.386 -0.977 0.334 9
-0.319 -1.073 0.448 8
-0.237 -1.213 0.58 9
-0.15 -1.302 0.776 8
-0.051 -1.327 0.966 8
-0.046 -1.194 0.869 9
0.054 -1.244 1.001 8
0.128 -1.305 1.057 9
0.2 -1.282 1.034 6
0.24 -1.116 0.965 10
0.14 -0.85 0.883 9
0.126 -0.765 0.794 8
-0.11 -0.342 0.82 9
-0.409 0.227 0.956 8
-0.836 0.771 1.102 8
-1.344 1.171 1.418 9
-1.683 1.351 1.998 8
-1.785 1.454 2.502 8
-1.607 1.309 2.252 9
-1.576 1.459 2.56 8
-1.468 1.635 2.762 7
-1.455 1.863 2.826 10
-1.722 2.235 2.745 8
-2.178 2.681 2.596 9
-2.614 2.999 2.462 8
-2.353 2.699 2.215 9
-2.765 2.854 2.25 8
-3.004 2.749 2.379 8
-2.975 2.47 2.586 9
-2.782 2.117 2.801 8
-2.502 1.755 2.865 9
-2.12 1.521 2.756 8
-1.908 1.369 2.48 7
-1.482 1.303 2.259 10
-1.068 1.289 1.917 8
-0.696 1.298 1.394 9
-0.338 1.411 0.853 8
-0.08 1.51 0.506 8
-0.072 1.359 0.455 9
-0.007 1.289 0.38 8
-0.014 0.996 0.616 9
-0.004 0.579 0.944 8
0.08 0.218 1.084 8
0.14 0.023 0.976 9
0.126 0.021 0.879 6
0.175 0.063 0.498 10
0.128 0.227 -0.12 9
-0.148 0.36 -0.72 8
-0.526 0.403 -1.072 9
-0.773 0.367 -1.329 8
-0.678 0.409 -1.727 8
-0.705 0.702 -2.237 9
-0.635 0.632 -2.013 8
-1.654 1.294 -2.304 9
-3.588 2.196 -1.754 8
-5.761 2.93 0.0 8
-7.574 3.181 2.782 7
-8.452 2.721 5.409 10
-7.607 2.449 6.583 9
-7.223 1.412 5.925 8
-5.359 0.305 5.204 8
-2.538 -0.753 2.895 9
0.304 -1.825 -0.057 8
2.379 -2.549 -2.837 9
3.255 -2.713 -4.679 8
2.93 -2.442 -4.211 8
2.479 -2.221 -4.468 9
1.122 -1.954 -3.128 8
-0.267 -1.985 -1.342 7
-1.125 -2.291 0.088 10
-1.343 -2.69 0.915 8
-0.98 -3.082 0.851 9
-0.882 -2.773 0.766 8
-0.048 -3.075 -0.14 8
1.01 -3.306 -1.547 9
1.811 -3.437 -2.936 8
1.828 -3.165 -3.772 9
1.138 -2.381 -3.961 8
0.311 -1.545 -3.615 8
0.28 -1.39 -3.254 9
-0.288 -1.081 -2.434 7
-0.586 -1.184 -1.296 10
-0.594 -1.472 -0.306 8
-0.166 -1.751 0.019 8
0.566 -1.81 -0.453 9
0.51 -1.629 -0.407 8
1.141 -1.497 -1.276 9
1.25 -1.092 -1.917 8
0.864 -0.528 -2.204 8
0.341 -0.082 -2.354 9
-0.042 0.093 -2.298 8
-0.201 0.03 -2.11 9
-0.181 0.027 -1.899 6
-0.202 -0.095 -1.89 10
-0.055 -0.32 -2.008 9
0.28 -0.693 -2.059 8
0.586 -1.004 -1.915 8
0.698 -1.123 -1.553 9
0.664 -1.128 -1.102 8
0.597 -1.015 -0.992 9
0.526 -0.957 -0.612 8
0.426 -0.842 -0.328 8
0.324 -0.705 -0.201 9
0.328 -0.558 -0.359 8
0.295 -0.502 -0.323 7
0.811 -0.349 -1.148 10
0.73 -0.314 -1.033 8
0.847 -0.24 -1.108 9
0.74 -0.236 -0.779 8
0.47 -0.23 -0.205 9
0.107 -0.074 0.426 8
-0.193 0.252 1.045 8
-0.173 0.227 0.941 9
-0.231 0.63 1.372 8
0.025 1.014 1.434 9
0.507 1.329 1.165 8
1.031 1.657 0.811 7
1.474 1.972 0.403 10
1.744 2.203 -0.043 8
1.57 1.983 -0.039 9
1.703 2.152 -0.388 8
1.837 2.153 -0.63 8
1.987 1.99 -0.703 9
2.017 1.677 -0.505 8
1.936 1.286 -0.148 8
1.961 0.893 0.086 9
1.765 0.803 0.077 8
1.867 0.45 0.032 9
1.908 0.178 -0.254 6
1.897 -0.032 -0.511 10
1.768 -0.21 -0.494 9
1.414 -0.287 -0.3 8
1.273 -0.258 -0.27 9
0.831 -0.162 -0.243 8
0.5 0.003 0.044 8
0.201 0.138 0.318 9
-0.139 0.228 0.704 8
-0.449 0.299 1.13 9
-0.741 0.407 1.441 8
-0.667 0.366 1.296 8
-0.908 0.441 1.39 7
-0.951 0.412 1.265 10
-0.805 0.292 0.909 9
-0.594 0.153 0.503 8
-0.421 0.066 0.231 8
-0.336 0.001 0.087 9
-0.303 0.001 0.078 8
-0.354 -0.033 0.025 8
-0.464 -0.068 0.015 9
-0.494 -0.225 -0.03 8
-0.43 -0.498 -0.1 9
-0.42 -0.855 -0.08 8
-0.378 -0.77 -0.072 7
-0.546 -1.096 0.081 10
-0.94 -1.256 0.401 8
-1.488 -1.195 0.837 9
-2.023 -0.972 1.202 8
-2.395 -0.782 1.4 8
-2.502 -0.715 1.278 9
-2.252 -0.643 1.15 8
-2.21 -0.643 0.701 9
-2.193 -0.614 0.27 8
-2.265 -0.519 0.112 8
-2.453 -0.268 0.166 9
-2.664 0.049 0.161 6
-2.631 0.186 -0.012 11
-2.368 0.168 -0.01 8
-2.107 0.085 -0.252 8
-1.761 -0.117 -0.452 9
-1.574 -0.308 -0.486 8
-1.634 -0.355 -0.225 9
-1.844 -0.21 0.185 8
-2.009 0.016 0.622 8
-1.808 0.015 0.56 9
-1.667 0.187 0.907 8
-1.148 0.289 0.834 9
-0.43 0.339 0.43 6
0.315 0.362 -0.096 10
1.002 0.432 -0.57 9
0.901 0.634 -0.864 8
1.453 0.571 -0.778 8
1.88 0.841 -0.97 9
2.248 1.019 -1.058 8
2.524 1.154 -1.017 9
2.736 1.33 -0.891 8
2.892 1.509 -0.687 8
2.603 1.358 -0.619 9
2.759 1.502 -0.311 8
2.902 1.582 0.156 7
2.916 1.678 0.814 10
2.784 1.876 1.466 8
2.727 2.066 1.927 9
2.909 2.161 1.98 8
2.618 1.945 1.782 9
2.846 2.05 1.46 8
3.0 2.191 1.165 8
3.202 2.328 0.957 9
3.389 2.512 0.68 8
3.455 2.79 0.288 8
3.368 3.01 -0.091 9
3.031 2.709 -0.082 7
2.792 2.773 -0.287 10
2.176 2.649 -0.11 8
1.229 2.273 0.857 8
0.303 1.555 2.427 9
-0.246 0.696 3.861 8
-0.221 0.626 3.475 9
-0.235 -0.15 4.325 8
-0.001 -0.742 4.292 8
0.264 -1.167 3.452 9
0.678 -1.417 2.264 8
1.17 -1.546 1.141 9
1.053 -1.391 1.027 6
1.443 -1.551 0.421 10
1.556 -1.769 0.739 9
1.269 -1.973 1.853 8
0.772 -1.968 2.988 9
0.357 -1.785 3.474 8
0.11 -1.51 3.149 8
0.053 -1.137 2.209 9
0.047 -1.023 1.988 8
0.259 -0.677 0.836 9
0.697 -0.525 -0.23 8
1.12 -0.558 -0.954 8
1.301 -0.676 -1.334 7
0.986 -0.742 -1.229 10
-0.013 -0.473 -0.437 8
-0.011 -0.426 -0.393 9
-1.245 0.064 0.449 8
-2.089 0.434 0.832 9
-2.322 0.641 0.755 8
-1.912 0.632 0.146 8
-1.037 0.38 -0.798 9
-0.934 0.342 -0.719 8
0.096 -0.035 -1.74 9
1.141 -0.511 -2.65 8
2.18 -1.041 -3.154 7
3.004 -1.572 -3.088 10
3.339 -2.024 -2.658 8
3.032 -2.2 -1.974 9
2.729 -1.98 -1.777 8
1.843 -1.908 -0.884 8
0.78 -1.657 -0.125 9
0.003 -1.364 0.035 8
-0.331 -1.108 -0.379 9
-0.213 -0.908 -1.072 8
0.32 -0.843 -1.768 8
0.288 -0.759 -1.591 9
1.051 -0.971 -2.147 6
1.855 -1.305 -2.451 11
2.44 -1.689 -2.338 8
2.291 -1.815 -1.732 8
1.496 -1.396 -0.8 9
1.346 -1.257 -0.72 8
0.594 -1.003 0.183 8
0.035 -1.064 0.658 9
-0.305 -1.112 0.449 8
-0.378 -1.018 -0.335 9
-0.329 -0.807 -1.338 8
-0.215 -0.673 -2.058 8
-0.194 -0.606 -1.852 7
-0.119 -0.583 -1.95 10
-0.157 -0.609 -1.429 9
-0.195 -0.673 -0.677 8
-0.11 -0.818 -0.077 8
0.047 -0.947 0.085 9
0.157 -0.939 -0.068 8
0.142 -0.845 -0.061 9
0.184 -0.685 -0.425 8
0.177 -0.369 -1.01 8
0.15 -0.026 -1.554 9
0.147 0.2 -1.942 8
0.132 0.18 -1.748 7
0.137 0.281 -1.924 10
0.099 0.309 -1.746 8
-0.103 0.293 -1.208 9
-0.405 0.28 -0.468 8
-0.522 0.212 0.116 8
-0.382 0.045 0.368 9
-0.123 -0.078 0.365 8
-0.111 -0.07 0.328 9
0.101 -0.087 0.182 8
0.215 -0.053 0.002 8
0.259 0.022 -0.163 9
0.252 0.116 -0.255 7
0.08 0.186 -0.205 10
-0.254 0.289 0.082 8
-0.229 0.26 0.074 8
-0.473 0.414 0.428 9
-0.542 0.507 0.65 8
-0.541 0.573 0.891 9
-0.499 0.648 1.09 8
-0.394 0.683 1.077 8
-0.355 0.615 0.969 9
-0.276 0.627 0.826 8
-0.315 0.63 0.64 9
-0.389 0.628 0.452 6
-0.416 0.603 0.303 10
-0.422 0.592 0.184 9
-0.483 0.601 -0.008 8
-0.435 0.541 -0.007 9
-0.599 0.635 -0.237 8
-0.776 0.822 -0.383 8
-0.873 0.976 -0.366 9
-0.854 1.046 -0.249 8
-0.704 1.043 -0.195 8
-0.456 0.99 -0.198 9
-0.411 0.891 -0.178 8
-0.188 0.827 -0.179 7
-0.03 0.762 -0.13 10
0.047 0.694 -0.084 8
-0.006 0.651 -0.059 9
-0.139 0.631 0.061 8
-0.274 0.586 0.215 9
-0.247 0.527 0.194 8
-0.337 0.477 0.271 8
-0.309 0.458 0.319 9
-0.197 0.405 0.355 8
-0.081 0.319 0.416 9
0.006 0.266 0.535 8
0.006 0.24 0.481 7
0.043 0.208 0.601 10
0.039 0.193 0.699 8
0.021 0.186 0.775 9
-0.009 0.217 0.788 8
-0.085 0.352 0.713 8
-0.145 0.507 0.592 9
-0.13 0.456 0.533 8
-0.097 0.506 0.426 9
0.026 0.413 0.35 8
0.188 0.293 0.324 8
0.297 0.25 0.289 9
0.267 0.225 0.133 6
0.274 0.411 -0.057 10
0.246 0.37 -0.052 9
0.171 0.466 -0.205 8
0.174 0.463 -0.336 9
0.266 0.324 -0.393 8
0.383 0.076 -0.369 8
0.495 -0.147 -0.176 9
0.445 -0.132 -0.158 8
0.519 -0.247 0.137 9
0.475 -0.28 0.329 8
0.296 -0.199 0.404 8
0.047 -0.007 0.369 7
-0.166 0.205 0.248 10
-0.204 0.303 0.096 9
-0.183 0.273 0.086 8
-0.032 0.224 -0.101 8
0.174 0.143 -0.252 9
0.352 0.1 -0.304 8
0.438 0.122 -0.265 9
0.415 0.19 -0.201 8
0.376 0.223 -0.18 8
0.338 0.201 -0.162 9
0.281 0.219 -0.126 8
0.201 0.233 -0.022 7
0.118 0.269 0.07 10
-0.006 0.325 0.061 8
-0.088 0.331 -0.023 9
-0.061 0.262 -0.097 8
-0.055 0.235 -0.087 8
0.046 0.129 -0.068 9
0.147 0.058 0.044 8
0.208 0.016 0.121 9
0.224 0.003 0.107 8
0.169 0.026 0.097 8
0.152 0.024 0.087 9
0.062 0.073 0.052 7
-0.001 0.11 -0.046 10
0.0 0.109 -0.088 8
0.056 0.121 -0.068 8
0.13 0.116 -0.153 9
0.224 0.152 -0.225 8
0.202 0.137 -0.202 9
0.262 0.212 -0.179 8
0.293 0.239 -0.056 8
0.282 0.257 0.161 9
0.142 0.287 0.399 8
-0.064 0.319 0.61 9
-0.058 0.287 0.549 6
-0.223 0.287 0.63 10
-0.324 0.295 0.578 9
-0.385 0.297 0.473 8
-0.37 0.249 0.383 8
# end
#Thu Feb 26 20:42:36 GMT+08:00 20158
