# Supplementary material for: Abnormal Gait Behavior Detection for Elderly Based on Enhanced Wigner-Ville Analysis and Cloud Incremental SVM Learning
Source: Hindawi journal article supplement (doi:10.1155/2016/5869238), 2016-01-01
Supplement: f1 [file 5869238.f1.zip › Supplementary Materials/Original Data/Leftward fall With recovery/original__149.txt]

# Accelerometer Values
# filename:  original__149.txt
# Saving start time: Thu Feb 26 20:42:38 GMT+08:00 2015

# sensor resolution: 0.0095825195m/s^2
#Sensorvendor: KIONIX, name: KX023 Accelerometer, type: 1,version : 1, range 39.240005

# X value, Y value, Z value, time diff in ms
0.095 -0.02 0.138 8
0.085 -0.018 0.122 8
0.057 -0.016 0.11 9
0.041 0.0 0.096 8
0.031 0.003 0.071 9
0.016 0.008 0.033 8
-0.008 0.026 -0.001 8
-0.041 0.055 -0.004 9
-0.037 0.049 -0.004 8
-0.065 0.065 0.012 9
-0.078 0.058 0.019 6
-0.068 0.046 0.019 10
-0.043 0.022 0.02 9
-0.019 -0.001 -0.012 8
-0.006 -0.011 -0.077 9
-0.006 -0.01 -0.069 8
-0.011 -0.002 -0.117 8
-0.012 -0.006 -0.145 9
0.011 -0.03 -0.183 8
0.046 -0.046 -0.246 8
0.085 -0.063 -0.301 9
0.098 -0.077 -0.293 8
0.088 -0.069 -0.263 7
0.063 -0.054 -0.181 10
0.035 -0.021 -0.077 8
0.046 -0.011 -0.033 9
0.097 -0.016 -0.098 8
0.17 -0.001 -0.264 9
0.153 -0.001 -0.237 8
0.223 0.016 -0.427 8
0.258 0.003 -0.513 9
0.273 -0.036 -0.445 8
0.294 -0.112 -0.315 9
0.353 -0.242 -0.209 8
0.318 -0.218 -0.188 7
0.428 -0.39 -0.095 10
0.523 -0.541 0.009 8
0.548 -0.644 0.088 9
0.525 -0.634 0.08 8
0.481 -0.507 -0.007 8
0.436 -0.376 -0.126 9
0.406 -0.309 -0.193 8
0.366 -0.278 -0.174 8
0.342 -0.305 -0.16 9
0.31 -0.318 -0.076 8
0.285 -0.321 0.036 9
0.285 -0.416 0.089 6
0.304 -0.499 0.102 10
0.368 -0.503 0.173 9
0.331 -0.452 0.156 8
0.504 -0.439 0.14 9
0.724 -0.416 -0.082 8
0.891 -0.371 -0.34 8
0.98 -0.328 -0.59 9
1.006 -0.315 -0.837 8
0.905 -0.283 -0.753 9
0.856 -0.273 -0.898 8
0.732 -0.242 -0.886 8
0.619 -0.232 -0.839 7
0.528 -0.257 -0.862 10
0.42 -0.283 -0.874 9
0.295 -0.323 -0.879 8
0.266 -0.291 -0.791 8
0.144 -0.334 -0.872 9
-0.02 -0.324 -0.956 8
-0.215 -0.268 -0.933 9
-0.284 -0.292 -0.915 8
-0.192 -0.459 -1.044 8
-0.026 -0.679 -1.216 9
-0.024 -0.611 -1.094 8
0.07 -0.784 -1.234 7
-0.044 -0.92 -1.256 10
-0.429 -1.106 -1.075 8
-0.911 -1.271 -0.641 9
-1.182 -1.415 -0.194 8
-1.063 -1.274 -0.175 8
-1.103 -1.477 0.007 9
-0.923 -1.687 0.033 8
-0.645 -1.823 -0.066 9
-0.42 -1.822 -0.234 8
-0.267 -1.741 -0.38 8
-0.215 -1.683 -0.491 9
-0.193 -1.515 -0.441 7
-0.257 -1.51 -0.494 10
-0.408 -1.494 -0.414 8
-0.598 -1.435 -0.107 8
-0.772 -1.313 0.292 9
-0.873 -1.187 0.54 8
-0.837 -1.052 0.524 9
-0.753 -0.947 0.472 8
-0.648 -0.766 0.242 8
-0.57 -0.561 0.025 9
-0.556 -0.394 -0.078 8
-0.69 -0.233 -0.038 8
-0.621 -0.21 -0.034 7
-1.318 0.44 0.399 10
-1.187 0.396 0.359 9
-1.451 0.661 0.617 8
-1.403 0.894 0.718 8
-1.138 1.101 0.747 9
-0.882 1.217 0.624 8
-0.884 1.318 0.39 9
-0.796 1.187 0.351 8
-1.078 1.47 0.219 8
-1.706 1.957 0.254 9
-2.572 2.48 0.387 8
-3.312 2.898 0.495 7
-3.774 3.155 0.64 10
-3.809 3.192 0.943 8
-3.428 2.873 0.848 9
-3.133 2.72 1.364 8
-2.831 2.519 1.919 9
-2.648 2.357 2.204 8
-2.313 2.277 2.182 8
-1.893 2.188 2.125 9
-1.605 1.999 2.206 8
-1.444 1.799 1.985 9
-1.397 1.682 2.219 8
-1.602 1.636 2.512 7
-1.931 1.498 2.653 10
-2.237 1.331 2.419 8
-2.304 1.208 1.846 9
-2.073 1.087 1.661 8
-1.798 0.98 1.033 8
-1.217 0.764 0.514 9
-0.438 0.387 0.184 8
0.232 0.012 0.266 8
0.463 -0.089 0.855 9
-0.054 0.094 1.736 8
-0.048 0.084 1.562 9
-1.618 0.37 2.685 6
-3.845 0.764 4.04 10
-5.885 1.096 5.13 9
-6.948 1.207 5.519 8
-6.556 1.147 4.745 9
-4.928 1.095 2.674 8
-4.436 0.986 2.406 8
-2.315 0.885 -0.088 9
-0.329 0.584 -2.071 8
0.978 0.117 -2.785 9
1.299 -0.638 -2.072 8
0.991 -1.715 -0.479 8
0.892 -1.543 -0.431 7
0.531 -2.706 1.32 10
0.266 -3.643 2.584 9
0.036 -4.043 2.803 8
-0.076 -3.895 1.991 8
0.068 -3.763 0.57 9
0.451 -3.72 -1.076 8
0.406 -3.348 -0.968 8
0.904 -3.246 -2.524 9
1.229 -3.255 -3.619 8
1.099 -3.34 -3.967 9
0.648 -3.424 -3.491 8
0.299 -3.597 -2.432 7
0.246 -3.698 -1.357 10
0.222 -3.328 -1.221 8
0.321 -3.202 -0.628 9
0.32 -2.777 -0.513 8
0.284 -2.137 -0.629 8
0.328 -1.526 -1.057 9
0.431 -0.99 -1.754 8
0.558 -0.489 -2.3 9
0.502 -0.44 -2.07 8
0.507 -0.086 -2.299 8
0.33 0.186 -2.27 9
-0.02 0.429 -2.024 6
-0.38 0.524 -1.481 11
-0.564 0.414 -0.738 8
-0.507 0.373 -0.665 8
-0.531 0.181 -0.598 9
-0.387 -0.009 0.26 8
-0.096 -0.162 0.254 9
0.21 -0.303 0.0 8
0.411 -0.394 -0.272 8
0.425 -0.382 -0.296 9
0.383 -0.344 -0.267 8
0.289 -0.321 -0.016 8
0.218 -0.303 0.284 7
0.172 -0.25 0.45 10
0.146 -0.17 0.478 9
0.195 -0.133 0.357 8
0.438 -0.224 0.088 8
0.395 -0.201 0.08 9
0.744 -0.385 -0.227 8
0.965 -0.522 -0.522 9
0.982 -0.564 -0.656 8
0.791 -0.549 -0.406 8
0.414 -0.507 -0.038 9
0.02 -0.444 0.19 8
0.018 -0.4 0.171 7
-0.199 -0.352 0.129 10
-0.261 -0.335 -0.086 8
-0.263 -0.315 -0.229 9
-0.263 -0.242 -0.31 8
-0.252 -0.088 -0.356 9
-0.227 -0.079 -0.32 8
-0.19 0.037 -0.394 8
-0.057 0.003 -0.5 9
0.236 -0.116 -0.458 8
0.598 -0.322 -0.28 9
0.99 -0.553 -0.147 8
0.891 -0.497 -0.133 7
1.042 -0.614 -0.016 10
0.76 -0.469 0.219 8
0.182 -0.11 0.507 8
-0.418 0.32 0.651 9
-0.614 0.679 0.559 8
-0.3 0.831 0.256 9
0.238 0.852 -0.094 8
0.214 0.767 -0.084 8
0.66 0.741 -0.344 9
0.849 0.721 -0.345 8
0.888 0.751 -0.114 9
1.09 0.691 0.15 6
1.506 0.492 0.299 10
1.862 0.321 0.293 9
1.675 0.289 0.263 8
1.768 0.365 0.347 9
1.423 0.807 0.568 8
0.566 1.461 0.91 8
-0.38 2.086 1.269 9
-0.815 2.45 1.223 8
-0.733 2.205 1.1 8
-0.464 2.183 0.565 9
0.374 1.83 -0.333 8
1.37 1.345 -1.181 7
2.022 0.879 -1.507 10
2.197 0.47 -1.234 8
1.965 0.131 -0.585 9
1.769 0.118 -0.527 8
1.249 -0.071 0.174 9
0.586 -0.047 0.65 8
-0.075 0.248 0.769 8
-0.571 0.637 0.688 9
-0.756 0.974 0.414 8
-0.624 1.291 -0.057 9
-0.562 1.162 -0.052 8
-0.313 1.378 -0.43 7
-0.029 1.406 -0.52 10
0.413 1.196 -0.27 8
0.97 0.859 0.137 9
1.363 0.616 0.515 8
1.227 0.554 1.047 8
1.277 0.499 0.942 9
0.986 0.554 1.702 8
0.538 0.74 2.487 9
0.257 0.987 3.054 8
0.318 1.247 3.174 8
0.702 1.442 2.836 9
0.632 1.298 2.552 6
1.26 1.457 1.946 11
1.886 1.623 1.261 8
2.309 1.652 0.667 8
2.428 1.39 0.447 9
2.125 0.795 0.964 8
1.478 0.023 2.185 8
1.33 0.02 1.967 9
0.659 -0.652 3.461 8
0.275 -1.15 4.606 9
0.328 -1.412 4.924 8
0.584 -1.324 4.436 8
0.526 -1.191 3.992 7
0.784 -0.615 2.868 10
0.706 -0.554 2.581 9
0.887 -0.615 2.242 8
1.41 -1.147 2.258 8
1.893 -1.799 2.503 9
1.844 -2.151 2.938 8
1.358 -2.164 3.14 9
1.222 -1.947 2.826 8
0.782 -1.761 2.348 8
0.581 -1.383 1.246 9
0.532 -0.929 -0.117 8
0.606 -0.579 -1.419 7
0.838 -0.395 -2.5 10
1.08 -0.347 -3.205 8
0.972 -0.312 -2.885 9
1.075 -0.368 -3.147 8
1.145 -0.494 -3.166 8
1.25 -0.622 -3.263 9
1.285 -0.718 -3.513 8
1.131 -0.708 -3.647 9
0.729 -0.531 -3.487 8
0.656 -0.478 -3.138 8
0.203 -0.231 -2.885 9
-0.054 -0.078 -2.665 7
-0.091 -0.114 -2.516 10
-0.047 -0.178 -2.363 8
0.104 -0.246 -2.288 8
0.094 -0.222 -2.06 9
0.121 -0.255 -1.771 8
0.068 -0.369 -1.629 9
0.292 -0.602 -1.794 8
0.427 -0.934 -1.589 8
0.487 -1.059 -1.166 9
0.522 -1.088 -0.951 8
0.47 -0.979 -0.856 9
0.541 -0.974 -0.844 6
0.748 -0.742 -1.027 10
0.884 -0.587 -1.47 9
0.941 -0.461 -1.905 8
0.954 -0.377 -2.195 9
0.904 -0.292 -2.28 8
0.813 -0.263 -2.052 8
0.483 -0.147 -1.985 9
-0.071 0.028 -1.617 8
-0.376 0.091 -1.076 8
-0.266 -0.027 -0.822 9
-0.003 -0.11 -0.989 8
-0.002 -0.099 -0.89 7
0.208 -0.083 -1.222 10
0.367 -0.048 -1.465 8
0.533 -0.03 -1.543 9
0.752 -0.046 -1.423 8
0.971 -0.105 -1.166 9
0.813 -0.085 -0.725 8
0.731 -0.076 -0.653 8
0.195 0.051 -0.018 9
-0.228 0.201 0.463 8
-0.424 0.348 0.604 9
-0.392 0.374 0.481 8
-0.122 0.278 0.094 7
0.199 0.242 -0.385 10
0.179 0.218 -0.346 8
0.39 0.31 -0.714 9
0.473 0.485 -0.868 8
0.468 0.668 -0.75 8
0.334 0.787 -0.441 9
0.05 0.917 0.036 8
-0.202 1.029 0.472 9
-0.182 0.926 0.425 8
-0.269 0.964 0.591 8
-0.198 1.0 0.549 9
-0.067 1.04 0.223 6
-0.022 1.07 -0.313 10
-0.029 1.082 -0.794 9
-0.026 1.049 -1.085 8
-0.024 0.944 -0.976 9
0.162 0.88 -1.033 8
0.116 0.876 -0.787 8
-0.137 0.871 -0.255 9
-0.354 0.787 0.432 8
-0.453 0.724 1.008 9
-0.408 0.651 0.908 8
-0.393 0.619 1.163 8
-0.284 0.626 1.184 7
-0.135 0.718 1.013 10
-0.015 0.879 0.756 9
0.048 1.003 0.565 8
0.081 1.028 0.395 8
0.072 0.925 0.355 9
0.153 0.91 0.232 8
0.254 0.85 0.306 9
0.33 0.741 0.628 8
0.346 0.646 0.971 8
0.239 0.595 1.137 9
0.118 0.56 1.116 8
0.106 0.504 1.004 7
0.058 0.471 0.823 10
0.065 0.446 0.445 8
0.122 0.465 -0.053 9
0.182 0.507 -0.572 8
0.24 0.552 -0.956 8
0.216 0.497 -0.86 9
0.273 0.526 -0.774 8
0.082 0.548 -0.475 9
-0.36 0.677 0.534 8
-0.69 0.839 1.316 8
-0.697 0.814 1.401 9
-0.628 0.733 1.26 7
-0.336 0.572 0.88 10
0.025 0.375 0.206 8
0.261 0.233 -0.573 8
0.3 0.231 -1.107 9
0.195 0.287 -1.306 8
0.012 0.332 -1.256 9
-0.283 0.427 -0.86 8
-0.255 0.384 -0.774 8
-0.661 0.519 -0.062 9
-0.964 0.582 0.577 8
-0.883 0.497 0.854 9
-0.516 0.261 0.802 6
-0.178 0.052 0.594 10
0.021 -0.039 0.325 9
0.019 -0.035 0.293 8
0.116 -0.054 0.024 8
0.141 -0.039 -0.152 9
0.155 -0.024 -0.216 8
0.162 -0.014 -0.175 9
0.186 -0.014 -0.001 8
0.167 -0.012 -0.001 8
0.2 -0.006 0.182 9
0.204 0.021 0.25 8
0.237 0.054 0.15 7
0.283 0.082 -0.054 10
0.276 0.114 -0.198 8
0.204 0.198 -0.285 9
0.183 0.178 -0.257 8
0.131 0.268 -0.396 9
0.167 0.277 -0.52 8
0.237 0.226 -0.525 8
0.278 0.135 -0.483 9
0.291 0.034 -0.437 8
0.247 -0.054 -0.373 9
0.222 -0.049 -0.335 8
0.103 -0.107 -0.226 7
-0.049 -0.124 -0.136 10
-0.172 -0.145 -0.108 8
-0.229 -0.165 -0.041 9
-0.221 -0.172 0.09 8
-0.142 -0.185 0.243 8
-0.128 -0.166 0.218 9
-0.001 -0.202 0.366 8
0.07 -0.268 0.341 8
0.067 -0.22 0.3 9
0.045 -0.107 0.242 8
0.106 -0.07 0.108 9
0.096 -0.063 0.097 6
0.199 -0.049 0.056 10
0.141 0.016 0.149 9
-0.048 0.122 0.367 8
-0.214 0.195 0.539 9
-0.348 0.291 0.623 8
-0.426 0.365 0.641 8
-0.383 0.328 0.577 9
-0.319 0.301 0.544 8
-0.124 0.17 0.49 9
0.148 -0.021 0.493 8
# end
#Thu Feb 26 20:42:41 GMT+08:00 20150
