# Supplementary material for: Abnormal Gait Behavior Detection for Elderly Based on Enhanced Wigner-Ville Analysis and Cloud Incremental SVM Learning
Source: Hindawi journal article supplement (doi:10.1155/2016/5869238), 2016-01-01
Supplement: f1 [file 5869238.f1.zip › Supplementary Materials/Original Data/Leftward fall With recovery/original__150.txt]

# Accelerometer Values
# filename:  original__150.txt
# Saving start time: Thu Feb 26 20:42:43 GMT+08:00 2015

# sensor resolution: 0.0095825195m/s^2
#Sensorvendor: KIONIX, name: KX023 Accelerometer, type: 1,version : 1, range 39.240005

# X value, Y value, Z value, time diff in ms
0.138 -0.036 0.209 10
0.251 -0.07 0.023 9
0.316 -0.078 -0.163 8
0.315 -0.079 -0.315 9
0.257 -0.064 -0.409 8
0.18 -0.029 -0.448 8
0.162 -0.026 -0.403 9
0.098 0.01 -0.411 8
0.036 0.067 -0.439 8
-0.024 0.13 -0.482 9
-0.039 0.15 -0.522 8
-0.018 0.117 -0.544 7
0.002 0.078 -0.493 10
0.002 0.07 -0.444 8
0.019 0.037 -0.339 9
0.026 -0.004 -0.219 8
0.005 -0.02 -0.077 9
-0.03 -0.024 0.049 8
-0.033 -0.045 0.099 8
-0.017 -0.067 0.102 9
-0.015 -0.061 0.092 8
-0.03 -0.071 0.165 9
-0.074 -0.07 0.259 8
-0.094 -0.08 0.281 7
-0.072 -0.096 0.257 10
-0.032 -0.109 0.246 8
-0.028 -0.098 0.221 9
-0.006 -0.104 0.256 8
-0.029 -0.084 0.295 8
-0.059 -0.055 0.303 9
-0.057 -0.036 0.278 8
-0.036 -0.034 0.244 8
-0.041 -0.04 0.23 9
-0.037 -0.036 0.207 8
-0.089 -0.012 0.2 9
-0.125 0.008 0.186 6
-0.1 0.005 0.166 10
-0.077 0.013 0.158 9
-0.081 0.021 0.151 8
-0.048 0.022 0.121 9
-0.043 0.02 0.108 8
0.031 0.017 0.065 8
0.113 -0.002 0.031 9
0.177 -0.031 0.029 8
0.209 -0.044 0.038 9
0.219 -0.029 0.029 8
0.197 -0.026 0.026 8
0.223 -0.011 0.024 7
0.265 -0.008 -0.071 10
0.268 0.001 -0.188 9
0.217 0.019 -0.292 8
0.138 0.031 -0.334 8
0.075 0.022 -0.307 9
0.067 0.02 -0.276 8
0.049 -0.024 -0.188 8
0.053 -0.079 -0.111 9
0.037 -0.115 -0.073 8
-0.015 -0.115 -0.032 9
-0.057 -0.091 -0.013 8
-0.051 -0.082 -0.012 7
-0.059 -0.07 -0.067 10
-0.053 -0.057 -0.137 8
-0.041 -0.036 -0.144 9
-0.015 -0.025 -0.133 8
0.021 -0.034 -0.167 8
0.077 -0.056 -0.256 9
0.138 -0.059 -0.363 8
0.124 -0.053 -0.326 9
0.158 -0.049 -0.407 8
0.181 -0.056 -0.432 8
0.211 -0.057 -0.401 9
0.228 -0.046 -0.313 7
0.224 -0.042 -0.209 10
0.202 -0.038 -0.188 8
0.217 -0.047 -0.177 8
0.271 -0.087 -0.224 9
0.341 -0.172 -0.212 8
0.371 -0.253 -0.147 9
0.362 -0.29 -0.061 8
0.382 -0.285 -0.002 8
0.344 -0.256 -0.002 9
0.41 -0.246 -0.028 8
0.492 -0.291 -0.13 9
0.62 -0.407 -0.243 6
0.776 -0.553 -0.306 10
0.88 -0.664 -0.323 9
0.895 -0.719 -0.314 8
0.806 -0.647 -0.283 8
0.767 -0.678 -0.263 9
0.698 -0.762 -0.178 8
0.614 -0.937 0.036 9
0.519 -1.114 0.34 8
0.433 -1.205 0.578 8
0.389 -1.084 0.52 9
0.358 -1.094 0.611 8
0.388 -1.04 0.528 7
0.303 -0.941 0.335 10
0.028 -0.707 0.17 8
-0.262 -0.397 0.025 9
-0.432 -0.223 -0.171 8
-0.388 -0.2 -0.154 9
-0.418 -0.206 -0.333 8
-0.447 -0.29 -0.415 8
-0.538 -0.379 -0.425 9
-0.579 -0.48 -0.407 8
-0.518 -0.647 -0.454 9
-0.353 -0.872 -0.636 8
-0.317 -0.785 -0.572 7
-0.125 -0.972 -0.858 10
0.009 -1.099 -1.175 8
0.096 -1.264 -1.465 8
0.152 -1.486 -1.654 9
0.194 -1.663 -1.693 8
0.234 -1.777 -1.62 9
0.21 -1.599 -1.458 8
0.234 -1.735 -1.367 8
0.154 -1.872 -1.223 9
0.041 -1.948 -1.073 8
-0.015 -1.954 -1.008 9
-0.013 -1.759 -0.907 6
-0.043 -1.704 -0.928 10
-0.038 -1.609 -1.012 9
-0.033 -1.545 -1.092 8
-0.042 -1.463 -1.046 9
-0.051 -1.322 -0.903 8
-0.049 -1.175 -0.695 8
-0.037 -1.034 -0.466 9
-0.033 -0.93 -0.419 8
-0.033 -0.785 -0.248 9
-0.04 -0.646 -0.166 8
-0.057 -0.539 -0.175 8
-0.202 -0.343 -0.224 7
-0.518 0.04 -0.216 10
-0.955 0.523 0.054 9
-0.859 0.47 0.048 8
-1.486 1.048 0.621 8
-2.128 1.715 1.261 9
-2.635 2.364 1.951 8
-2.949 2.757 2.699 8
-3.033 2.777 3.398 9
-3.022 2.606 3.832 8
-2.719 2.346 3.448 9
-2.77 2.28 3.416 8
-3.026 2.562 2.987 7
-3.521 3.124 2.358 10
-3.928 3.665 1.649 8
-3.987 3.987 1.12 9
-3.588 3.969 0.981 8
-3.229 3.572 0.883 8
-3.007 3.335 1.123 9
-2.773 3.133 1.579 8
-2.826 3.105 1.788 9
-3.091 3.304 1.388 8
-3.308 3.627 0.604 8
-2.977 3.264 0.543 9
-2.871 3.512 -0.132 6
-2.463 3.436 -0.27 11
-1.938 3.023 0.12 8
-1.338 2.44 0.679 8
-0.844 1.771 1.133 9
-0.655 1.175 1.502 8
-0.59 1.058 1.351 9
-0.618 0.528 1.534 8
-0.633 0.07 1.324 8
-0.713 -0.111 1.066 9
-1.314 -0.118 1.172 8
-2.569 -0.146 1.803 8
-2.312 -0.131 1.623 7
-3.772 -0.166 2.672 10
-4.943 -0.177 3.773 9
-5.522 -0.093 4.471 8
-5.283 0.012 4.17 8
-4.145 -0.098 3.054 9
-2.351 -0.558 1.84 8
-0.341 -1.324 0.741 9
-0.306 -1.192 0.667 8
1.329 -2.025 -0.428 8
2.003 -2.546 -1.396 9
1.726 -2.656 -1.884 8
1.066 -2.676 -1.887 7
0.558 -2.745 -1.746 10
0.502 -2.47 -1.571 8
0.348 -2.577 -1.414 9
0.548 -2.745 -1.725 8
0.852 -2.923 -1.723 9
1.056 -3.14 -1.344 8
1.126 -3.379 -0.566 8
0.982 -3.529 0.133 9
0.884 -3.176 0.12 8
0.556 -3.386 0.221 8
0.171 -3.625 -0.235 9
-0.101 -3.758 -0.736 7
-0.178 -3.738 -1.114 10
-0.081 -3.595 -1.499 8
0.059 -3.332 -1.772 8
0.053 -2.999 -1.595 9
0.147 -2.735 -1.652 8
0.235 -2.457 -1.563 9
0.336 -2.068 -1.553 8
0.417 -1.562 -1.703 8
0.451 -1.08 -1.85 9
0.433 -0.659 -1.861 8
0.39 -0.593 -1.675 9
0.32 -0.197 -1.628 6
0.073 0.155 -1.545 10
-0.247 0.401 -1.379 9
-0.425 0.518 -1.149 8
-0.452 0.533 -0.963 9
-0.307 0.489 -0.852 8
-0.276 0.44 -0.767 8
0.005 0.372 -0.704 9
0.26 0.285 -0.679 8
0.527 0.209 -0.657 9
0.846 0.098 -0.596 8
1.075 0.003 -0.405 8
0.967 0.002 -0.364 7
1.084 0.0 -0.082 10
1.088 0.082 0.178 8
1.024 0.19 0.259 9
0.936 0.333 0.098 8
0.815 0.595 -0.152 9
0.688 0.881 -0.385 8
0.619 0.793 -0.346 8
0.58 0.944 -0.526 9
0.645 0.845 -0.656 8
0.645 0.614 -0.704 9
0.51 0.413 -0.6 8
0.315 0.208 -0.405 7
0.118 0.056 -0.259 10
0.106 0.051 -0.233 8
-0.052 0.058 -0.17 9
-0.136 0.172 -0.184 8
-0.079 0.27 -0.36 8
0.098 0.236 -0.675 9
0.332 0.075 -1.044 8
0.507 -0.071 -1.379 9
0.457 -0.064 -1.241 8
0.413 -0.056 -1.389 8
0.013 0.157 -1.212 9
-0.594 0.475 -0.796 6
-1.106 0.702 -0.313 10
-1.348 0.797 0.055 9
-1.214 0.717 0.049 8
-1.226 0.743 0.126 9
-1.108 0.683 -0.034 8
-0.959 0.56 -0.299 8
-0.907 0.443 -0.443 9
-0.993 0.414 -0.368 8
-1.248 0.529 -0.147 9
-1.123 0.476 -0.132 8
-1.43 0.617 0.229 8
-1.605 0.687 0.566 7
-1.644 0.727 0.7 10
-1.457 0.755 0.58 9
-0.969 0.771 0.065 8
-0.302 0.755 -0.713 8
-0.272 0.68 -0.642 9
0.376 0.647 -1.324 8
0.834 0.615 -1.611 9
0.99 0.603 -1.432 8
0.925 0.576 -1.044 8
0.823 0.502 -0.533 9
0.914 0.396 -0.037 8
0.822 0.356 -0.033 7
1.061 0.187 0.344 10
1.286 -0.11 0.734 8
1.694 -0.42 0.996 9
2.359 -0.58 1.008 8
3.089 -0.561 0.754 8
2.78 -0.505 0.679 9
3.433 -0.368 0.321 8
3.791 -0.088 0.174 9
3.655 0.288 0.44 8
3.116 0.722 1.1 8
2.667 1.09 1.947 9
2.4 0.981 1.752 7
2.384 1.131 2.537 10
2.741 1.198 2.866 8
3.297 1.374 2.612 8
3.731 1.632 2.201 9
3.763 1.899 2.152 8
3.326 2.202 2.523 9
2.66 2.391 2.965 8
2.394 2.152 2.669 8
1.863 2.214 2.992 9
1.592 2.204 3.069 8
1.623 2.067 2.808 9
1.937 1.795 2.317 6
2.409 1.486 1.857 10
2.77 1.15 1.694 9
2.493 1.035 1.525 8
2.286 0.799 2.056 9
1.467 0.643 3.243 8
0.555 0.422 4.203 8
-0.191 0.303 4.404 9
-0.659 0.33 3.952 8
-0.593 0.297 3.556 8
-0.642 0.244 2.737 9
-0.315 -0.014 1.85 8
0.13 -0.461 1.367 7
0.378 -1.097 1.743 10
0.304 -1.693 2.794 8
0.275 -2.075 3.526 9
0.247 -1.867 3.173 8
0.536 -2.069 2.864 9
0.863 -2.03 1.671 8
1.007 -1.775 0.164 8
1.087 -1.43 -1.306 9
1.224 -1.069 -2.498 8
1.309 -0.807 -3.0 9
1.178 -0.726 -2.7 8
1.034 -0.688 -2.317 7
0.642 -0.671 -1.436 10
0.287 -0.616 -0.728 8
0.109 -0.614 -0.524 8
0.03 -0.585 -0.797 9
0.027 -0.526 -1.366 8
-0.097 -0.334 -1.229 9
-0.555 0.16 -1.731 8
-1.202 0.816 -1.916 8
-1.595 1.253 -1.9 9
-1.664 1.334 -1.705 8
-1.47 1.083 -1.172 9
-1.323 0.975 -1.054 6
-0.96 0.521 -0.437 10
-0.269 0.049 -0.613 9
0.638 -0.329 -1.414 8
1.168 -0.624 -1.922 9
1.14 -0.777 -2.04 8
0.848 -0.7 -1.884 8
0.764 -0.63 -1.696 9
0.435 -0.508 -1.219 8
0.16 -0.476 -0.853 9
0.147 -0.668 -0.718 8
0.423 -0.961 -0.776 8
0.868 -1.132 -1.063 7
1.42 -1.386 -1.331 10
1.278 -1.247 -1.198 9
1.807 -1.632 -1.381 8
2.122 -1.847 -1.38 8
2.034 -1.615 -1.4 9
1.503 -1.127 -1.458 8
0.84 -0.76 -1.4 9
0.756 -0.684 -1.26 8
0.161 -0.415 -1.1 8
-0.293 -0.224 -0.976 9
-0.545 -0.208 -0.939 8
-0.651 -0.288 -0.859 7
-0.52 -0.476 -0.784 10
-0.151 -0.792 -0.778 8
-0.136 -0.713 -0.7 9
0.262 -0.979 -0.739 8
0.489 -1.072 -0.893 8
0.49 -1.008 -1.164 9
0.429 -0.878 -1.418 8
0.452 -0.813 -1.541 9
0.497 -0.745 -1.621 8
0.447 -0.671 -1.459 8
0.414 -0.527 -1.551 9
0.292 -0.354 -1.584 7
0.232 -0.199 -1.726 10
0.309 -0.087 -1.976 8
0.391 -0.005 -2.099 8
0.411 0.057 -1.948 9
0.37 0.051 -1.753 8
0.3 0.091 -1.355 9
0.093 0.147 -0.754 8
-0.122 0.24 -0.123 8
-0.072 0.311 0.279 9
0.207 0.339 0.393 8
0.186 0.324 0.291 9
0.168 0.292 0.262 6
0.67 0.266 0.092 10
0.749 0.284 -0.002 9
0.703 0.329 -0.01 8
0.585 0.447 0.078 8
0.463 0.611 0.235 9
0.417 0.55 0.211 8
0.353 0.643 0.385 9
0.322 0.702 0.604 8
0.243 0.78 0.868 8
0.13 0.823 1.057 9
0.037 0.866 1.107 8
0.033 0.779 0.997 7
0.001 0.858 0.96 10
0.066 0.879 0.798 8
0.184 0.819 0.544 9
0.291 0.732 0.354 8
0.38 0.667 0.361 9
0.397 0.613 0.56 8
0.365 0.542 0.901 8
0.329 0.487 0.811 9
0.284 0.43 1.196 8
0.168 0.464 1.446 8
-0.032 0.609 1.473 9
-0.343 0.754 1.255 7
-0.72 0.887 0.931 10
-1.08 1.082 0.576 8
-0.972 0.974 0.519 8
-1.222 1.163 0.131 9
-1.291 1.226 -0.277 8
-1.245 1.198 -0.667 9
-1.127 1.112 -0.916 8
-0.963 0.961 -0.972 8
-0.866 0.865 -0.875 9
-0.743 0.684 -0.724 8
-0.69 0.505 -0.462 9
-0.662 0.336 -0.213 6
-0.677 0.26 -0.001 10
-0.721 0.3 0.145 9
-0.71 0.315 0.213 8
-0.639 0.284 0.192 9
-0.592 0.268 0.201 8
-0.547 0.293 0.185 8
-0.516 0.348 0.172 9
-0.499 0.396 0.179 8
-0.485 0.438 0.254 9
-0.451 0.435 0.442 8
-0.406 0.392 0.398 8
-0.392 0.379 0.61 7
-0.425 0.447 0.646 10
-0.432 0.516 0.471 9
-0.365 0.524 0.288 8
-0.24 0.486 0.213 8
-0.108 0.41 0.18 9
-0.098 0.369 0.162 8
0.024 0.289 0.134 8
0.117 0.217 0.061 9
0.129 0.176 -0.055 8
0.069 0.176 -0.139 9
-0.016 0.199 -0.172 8
-0.015 0.179 -0.155 7
-0.092 0.192 -0.163 10
-0.135 0.162 -0.157 8
-0.15 0.094 -0.143 9
-0.147 0.008 -0.136 8
-0.12 -0.08 -0.132 8
-0.076 -0.177 -0.124 9
-0.068 -0.159 -0.112 8
-0.031 -0.218 -0.111 9
-0.034 -0.207 -0.106 8
-0.087 -0.155 -0.083 8
-0.164 -0.093 -0.025 9
-0.225 -0.055 0.055 6
-0.289 -0.026 0.149 11
-0.26 -0.023 0.134 8
-0.345 0.042 0.201 8
-0.405 0.126 0.202 9
-0.381 0.15 0.179 8
-0.258 0.118 0.124 8
-0.1 0.067 0.014 9
-0.09 0.015 -0.092 8
-0.081 0.014 -0.083 9
0.138 0.01 -0.13 8
0.118 0.064 -0.149 8
0.008 0.138 -0.2 7
-0.109 0.202 -0.25 10
-0.18 0.239 -0.243 9
-0.162 0.215 -0.219 8
-0.178 0.227 -0.163 8
-0.139 0.201 -0.092 9
-0.053 0.148 -0.02 8
0.025 0.105 0.075 9
0.051 0.084 0.153 8
0.044 0.077 0.131 8
0.04 0.069 0.118 9
0.025 0.066 0.036 8
0.004 0.079 -0.019 7
-0.047 0.099 -0.039 10
-0.092 0.111 -0.028 8
-0.096 0.108 0.01 9
-0.068 0.095 0.095 8
-0.061 0.086 0.086 8
-0.03 0.061 0.198 9
-0.013 0.025 0.256 8
-0.014 -0.001 0.242 9
-0.031 -0.016 0.196 8
-0.022 -0.036 0.145 8
-0.02 -0.032 0.131 9
0.033 -0.08 0.11 7
0.099 -0.106 0.154 10
0.12 -0.092 0.19 8
0.123 -0.105 0.063 8
0.116 -0.067 -0.081 9
0.095 0.012 -0.149 8
0.085 0.011 -0.134 9
0.129 0.034 -0.189 8
0.221 0.0 -0.199 8
0.277 -0.024 -0.17 9
0.287 0.0 -0.124 8
0.275 0.032 -0.069 9
0.247 0.029 -0.062 6
0.235 0.038 0.064 10
0.219 0.03 0.192 9
0.177 0.023 0.204 8
0.12 0.026 0.113 9
0.101 0.022 0.002 8
0.123 -0.046 -0.052 8
0.111 -0.041 -0.047 9
# end
#Thu Feb 26 20:42:47 GMT+08:00 2015 
