# Supplementary material for: Abnormal Gait Behavior Detection for Elderly Based on Enhanced Wigner-Ville Analysis and Cloud Incremental SVM Learning
Source: Hindawi journal article supplement (doi:10.1155/2016/5869238), 2016-01-01
Supplement: f1 [file 5869238.f1.zip › Supplementary Materials/Original Data/Lying on a bed then standing/original__43.txt]

# Accelerometer Values
# filename:  original__43.txt
# Saving start time: Thu Feb 26 20:25:23 GMT+08:00 2015

# sensor resolution: 0.0095825195m/s^2
#Sensorvendor: KIONIX, name: KX023 Accelerometer, type: 1,version : 1, range 39.240005

# X value, Y value, Z value, time diff in ms
-0.08 -0.181 -0.196 10
-0.072 -0.163 -0.176 9
-0.074 -0.175 -0.28 8
-0.068 -0.161 -0.257 9
-0.011 -0.164 -0.191 8
0.071 -0.158 -0.097 8
0.125 -0.091 -0.01 9
0.098 -0.019 0.037 8
0.089 -0.017 0.034 9
-0.011 -0.005 0.065 8
-0.144 -0.021 0.092 8
-0.274 -0.049 0.151 7
-0.373 -0.101 0.219 10
-0.393 -0.156 0.278 9
-0.31 -0.193 0.345 8
-0.279 -0.174 0.31 8
-0.118 -0.203 0.356 9
0.092 -0.204 0.374 8
0.291 -0.17 0.363 8
0.4 -0.133 0.312 9
0.396 -0.107 0.21 8
0.357 -0.096 0.189 9
0.233 -0.075 0.043 8
0.0 -0.045 -0.094 7
-0.241 -0.032 -0.188 10
-0.366 -0.038 -0.273 8
-0.311 -0.037 -0.347 9
-0.13 -0.039 -0.321 8
-0.117 -0.035 -0.289 8
0.074 -0.037 -0.222 9
0.198 -0.033 -0.171 8
0.27 -0.015 -0.09 9
0.322 0.028 0.002 8
0.331 0.078 0.104 8
0.269 0.102 0.209 9
0.242 0.092 0.188 6
0.128 0.071 0.266 11
0.024 0.037 0.277 8
0.062 0.055 0.262 8
0.177 0.049 0.184 9
0.225 -0.023 0.013 8
0.217 -0.012 -0.02 9
0.195 -0.011 -0.018 8
0.081 0.257 0.215 8
0.148 0.21 0.345 9
0.297 -0.111 -0.072 8
0.237 -0.167 -0.582 8
0.121 -0.151 -0.62 7
0.019 -0.128 -0.253 10
0.017 -0.115 -0.227 9
0.012 -0.11 0.211 8
0.082 -0.114 0.465 8
0.202 -0.107 0.536 9
0.322 -0.092 0.483 8
0.321 -0.087 0.395 9
0.213 -0.105 0.317 8
0.192 -0.095 0.285 8
0.091 -0.12 0.218 9
0.036 -0.14 0.138 8
0.004 -0.145 0.0 7
-0.004 -0.131 -0.173 10
0.006 -0.094 -0.265 8
0.025 -0.047 -0.268 9
0.022 -0.042 -0.241 8
0.051 -0.007 -0.206 9
0.061 -0.002 -0.1 8
0.046 -0.038 0.066 8
0.03 -0.135 0.211 9
0.015 -0.278 0.293 8
0.0 -0.415 0.276 8
0.0 -0.373 0.249 9
0.004 -0.485 0.12 7
-0.056 -0.441 -0.08 10
-0.206 -0.302 -0.18 8
-0.213 -0.171 -0.201 8
-0.093 -0.059 -0.246 9
-0.083 -0.053 -0.222 8
0.001 -0.061 -0.224 9
0.05 -0.159 -0.173 8
0.075 -0.279 -0.108 8
0.114 -0.414 -0.021 9
0.124 -0.518 0.099 8
0.091 -0.581 0.157 9
0.082 -0.523 0.141 6
0.117 -0.599 0.073 10
0.263 -0.619 -0.091 9
0.528 -0.561 -0.365 8
0.885 -0.536 -0.656 9
1.215 -0.529 -0.939 8
1.414 -0.476 -1.241 8
1.272 -0.428 -1.117 9
1.331 -0.34 -1.34 8
1.256 -0.292 -1.471 9
0.997 -0.28 -1.511 8
0.555 -0.227 -1.589 8
0.0 -0.142 -1.664 7
-0.556 -0.02 -1.399 10
-0.5 -0.018 -1.259 9
-0.95 0.138 -0.865 8
-1.213 0.247 -0.644 8
-1.189 0.139 -0.51 9
-0.749 -0.436 -0.441 8
-0.18 -1.148 -0.392 8
0.087 -1.516 -0.329 9
0.078 -1.364 -0.296 8
0.183 -1.489 -0.258 9
0.246 -1.489 -0.311 8
0.215 -1.424 -0.502 7
0.163 -1.271 -0.687 10
0.189 -1.119 -0.647 8
0.284 -0.965 -0.391 9
0.256 -0.868 -0.352 8
0.331 -0.655 -0.055 8
0.349 -0.551 0.236 9
0.312 -0.57 0.46 8
0.244 -0.487 0.592 9
0.186 -0.324 0.623 8
0.172 -0.206 0.58 8
0.154 -0.185 0.522 9
0.238 -0.076 0.458 6
0.407 0.111 0.236 11
0.674 0.311 -0.009 8
0.899 0.392 -0.095 8
0.948 0.425 0.072 9
0.888 0.483 0.46 8
0.799 0.435 0.414 8
0.587 0.527 0.773 9
0.213 0.622 0.958 8
-0.211 0.721 0.943 9
-0.518 0.794 0.733 8
-0.47 0.762 0.369 8
-0.423 0.685 0.332 7
0.036 0.647 0.029 10
0.677 0.659 -0.004 9
1.058 0.619 0.19 8
0.923 0.519 0.492 8
0.433 0.462 0.792 9
-0.101 0.483 0.941 8
-0.091 0.435 0.847 9
-0.463 0.483 0.859 8
-0.567 0.606 0.862 8
-0.401 0.83 0.894 9
-0.016 1.015 0.967 8
0.416 1.1 1.202 7
0.72 1.108 1.581 10
0.648 0.997 1.423 8
0.685 0.984 1.787 9
0.418 0.982 1.977 8
0.066 0.917 1.971 8
-0.151 0.883 1.85 9
-0.168 1.046 1.741 8
-0.043 1.275 1.745 9
-0.039 1.147 1.571 8
0.185 1.279 1.618 8
0.511 1.314 1.633 9
0.842 1.336 1.64 7
0.984 1.405 1.622 10
0.886 1.459 1.427 8
0.563 1.509 1.104 8
0.507 1.358 0.994 9
0.065 1.486 0.79 8
-0.197 1.563 0.83 9
-0.151 1.397 0.962 8
-0.121 1.262 0.994 8
-0.246 1.282 0.983 9
-0.397 1.32 1.002 8
-0.357 1.188 0.901 9
-0.452 1.108 0.819 6
-0.532 1.006 0.627 10
-0.67 1.113 0.5 9
-0.722 1.172 0.191 8
-0.703 1.158 -0.278 9
-0.647 1.142 -0.618 8
-0.582 1.027 -0.556 8
-0.444 0.96 -0.661 9
-0.213 0.767 -0.512 8
0.117 0.425 -0.083 8
0.362 -0.003 0.464 9
0.356 -0.374 0.719 8
0.321 -0.337 0.647 7
0.137 -0.574 0.555 10
-0.09 -0.699 0.31 8
-0.208 -0.772 0.189 9
-0.153 -0.775 0.398 8
0.023 -0.698 0.802 9
0.228 -0.52 1.084 8
0.367 -0.248 0.901 8
0.33 -0.223 0.811 9
0.418 0.076 0.094 8
0.503 0.343 -0.816 9
0.565 0.531 -1.558 8
0.639 0.567 -1.958 7
0.767 0.417 -1.951 10
0.896 0.115 -1.696 8
0.806 0.104 -1.527 9
0.818 -0.239 -1.356 8
0.572 -0.46 -1.277 8
0.226 -0.7 -1.376 9
0.013 -0.807 -1.582 8
-0.004 -0.452 -1.673 8
0.282 -0.055 -1.945 9
0.254 -0.049 -1.75 8
0.854 -0.084 -2.321 9
1.467 -0.387 -3.033 6
1.868 -0.576 -3.768 10
1.952 -0.325 -4.146 9
1.964 0.048 -4.077 8
1.768 0.043 -3.669 9
1.824 0.073 -3.302 8
1.6 0.054 -2.534 8
1.202 0.11 -1.946 9
0.845 0.09 -1.61 8
0.584 -0.057 -1.436 9
0.157 -0.232 -1.317 8
0.141 -0.209 -1.186 8
-0.599 -0.32 -1.103 7
-1.273 -0.416 -1.127 10
-1.509 -0.511 -1.175 9
-1.443 -0.515 -1.107 8
-1.246 -0.414 -0.895 8
-0.802 -0.331 -0.441 9
-0.722 -0.298 -0.397 8
-0.007 -0.306 0.107 9
0.645 -0.461 0.386 8
0.782 -0.714 0.472 8
0.304 -1.017 0.208 9
-0.603 -1.289 -0.499 8
-0.542 -1.16 -0.449 7
-1.436 -1.233 -1.165 10
-1.93 -1.076 -1.673 8
-1.939 -0.609 -1.795 9
-1.308 -0.078 -1.468 8
-0.214 0.198 -0.877 8
0.642 0.339 -0.107 9
0.805 0.376 0.53 8
0.725 0.338 0.477 9
0.269 0.182 0.812 8
-0.537 -0.061 0.94 8
-1.267 -0.113 1.047 9
-1.411 0.087 1.223 7
-0.727 0.458 1.187 10
0.517 0.876 0.662 8
0.465 0.789 0.596 8
1.606 1.106 -0.239 9
2.172 1.283 -0.923 8
2.089 1.203 -1.22 9
1.384 0.819 -1.244 8
0.292 0.332 -0.994 8
-0.755 -0.163 -0.56 9
-0.68 -0.146 -0.504 8
-1.543 -0.363 -0.015 9
-1.927 -0.166 0.444 6
-1.404 0.183 0.621 10
-0.186 0.514 0.451 9
1.081 0.701 0.173 8
1.845 0.807 0.004 8
1.661 0.727 0.004 9
1.695 0.739 -0.053 8
0.999 0.603 -0.254 9
-0.044 0.447 -0.646 8
-0.981 0.307 -1.181 8
-1.558 0.194 -1.669 9
-1.788 0.323 -1.728 8
-1.609 0.291 -1.555 7
-1.461 0.565 -1.207 10
-0.948 0.735 -0.711 8
-0.397 0.772 -0.167 9
-0.148 0.61 0.385 8
-0.245 0.282 0.835 9
-0.221 -0.133 1.179 8
-0.198 -0.12 1.061 8
-1.132 -0.36 1.335 9
-1.398 -0.405 1.705 8
-1.086 -0.33 2.252 9
-0.412 -0.099 2.746 8
-0.37 -0.089 2.472 7
0.334 0.201 2.686 10
0.863 0.469 2.499 8
1.134 0.563 1.946 9
1.129 0.522 1.289 8
0.814 0.361 0.65 8
0.227 0.076 0.041 9
-0.485 -0.298 -0.41 8
-0.437 -0.268 -0.369 8
-1.105 -0.587 -0.513 9
-1.531 -0.578 -0.478 8
-1.513 -0.447 -0.633 9
-0.991 -0.434 -0.769 6
-0.3 -0.379 -0.678 10
0.136 -0.309 -0.681 9
0.123 -0.278 -0.612 8
0.247 -0.307 -0.725 9
0.134 -0.357 -0.693 8
-0.139 -0.386 -0.433 8
-0.475 -0.412 -0.006 9
-0.821 -0.411 0.541 8
-1.015 -0.354 0.993 9
-0.913 -0.319 0.894 8
-0.788 -0.244 1.012 8
-0.471 -0.086 0.856 7
-0.088 0.142 0.564 10
0.322 0.301 0.264 9
0.665 0.364 0.146 8
0.909 0.38 0.261 8
0.818 0.342 0.235 9
0.896 0.333 0.362 8
0.732 0.338 0.348 8
0.452 0.358 0.235 9
0.207 0.357 0.094 8
0.045 0.314 -0.038 9
-0.036 0.241 -0.135 8
-0.032 0.216 -0.122 7
-0.029 0.156 -0.142 10
0.044 0.095 -0.062 8
0.082 -0.019 0.06 9
0.015 -0.173 0.176 8
-0.018 -0.338 0.226 8
0.033 -0.497 0.107 9
0.029 -0.447 0.096 8
0.08 -0.56 -0.116 9
0.094 -0.613 -0.296 8
0.028 -0.609 -0.579 8
0.051 -0.623 -0.828 9
0.046 -0.56 -0.745 6
0.158 -0.536 -0.659 11
0.142 -0.482 -0.593 8
0.365 -0.408 -0.527 8
0.736 -0.307 -0.49 9
1.057 -0.202 -0.444 8
1.253 -0.133 -0.361 9
1.26 -0.087 -0.231 8
1.134 -0.079 -0.208 8
1.006 -0.045 -0.187 9
0.857 0.0 -0.034 8
0.748 0.093 -0.219 8
0.656 0.212 -0.441 7
0.544 0.267 -0.579 10
0.434 0.265 -0.621 9
0.39 0.239 -0.559 8
0.377 0.218 -0.583 8
0.51 0.178 -0.632 9
0.727 0.251 -0.56 8
0.941 0.373 -0.359 9
1.079 0.421 -0.137 8
1.112 0.441 0.116 8
1.001 0.397 0.104 9
0.921 0.385 0.266 8
0.656 0.34 0.284 7
0.263 0.244 0.218 10
-0.091 0.152 0.066 8
-0.384 0.092 -0.126 9
-0.691 0.04 -0.278 8
-0.622 0.036 -0.25 9
-0.897 0.003 -0.339 8
-0.94 -0.075 -0.326 8
-0.738 -0.144 -0.078 9
-0.456 -0.161 0.393 8
-0.141 -0.237 0.927 8
0.349 -0.378 1.407 9
0.314 -0.341 1.266 7
0.934 -0.459 1.661 10
1.402 -0.536 1.739 8
1.599 -0.499 1.45 8
1.603 -0.406 1.078 9
1.539 -0.379 0.633 8
1.443 -0.368 0.175 9
1.299 -0.331 0.157 8
1.18 -0.319 -0.102 8
1.05 -0.308 -0.11 9
0.936 -0.297 0.042 8
0.849 -0.277 0.231 9
0.843 -0.236 0.399 6
0.987 -0.194 0.371 10
0.888 -0.175 0.334 9
1.126 -0.031 0.194 8
1.337 0.073 0.175 9
1.383 0.041 0.226 8
1.224 0.011 0.292 8
0.919 -0.035 0.245 9
0.51 -0.07 0.028 8
0.459 -0.063 0.025 9
0.126 -0.087 -0.232 8
0.019 -0.116 -0.412 8
0.058 -0.178 -0.47 7
0.024 -0.26 -0.402 10
-0.027 -0.371 -0.144 8
-0.035 -0.465 0.185 9
-0.031 -0.419 0.167 8
-0.092 -0.442 0.383 9
-0.156 -0.415 0.573 8
-0.161 -0.359 0.698 8
-0.142 -0.262 0.621 9
-0.14 -0.117 0.335 8
-0.126 -0.105 0.302 9
-0.128 0.029 0.271 8
-0.146 0.099 -0.471 7
-0.169 0.103 -0.633 10
-0.152 0.081 -0.776 8
-0.124 0.041 -0.835 9
-0.202 -0.026 -0.739 8
-0.181 -0.024 -0.665 8
-0.297 -0.121 -0.517 9
-0.307 -0.212 -0.392 8
-0.242 -0.27 -0.314 9
-0.262 -0.307 -0.262 8
-0.465 -0.316 -0.224 8
-0.686 -0.314 -0.198 9
-0.617 -0.283 -0.178 6
-0.679 -0.314 -0.156 10
-0.539 -0.331 -0.094 9
-0.286 -0.285 0.003 8
-0.043 -0.212 0.089 9
0.131 -0.156 0.184 8
0.236 -0.109 0.269 8
0.213 -0.098 0.242 9
0.26 -0.051 0.306 8
0.268 -0.005 0.415 9
0.26 0.059 0.501 8
0.27 0.159 0.454 8
0.327 0.254 0.295 7
0.419 0.322 0.11 10
0.377 0.29 0.099 9
0.455 0.334 -0.076 8
0.496 0.341 -0.162 8
0.532 0.325 -0.132 9
0.605 0.3 -0.071 8
0.672 0.272 -0.034 9
0.714 0.255 -0.007 8
0.642 0.23 -0.006 8
0.694 0.247 0.084 9
0.769 0.273 0.203 8
0.9 0.297 0.326 7
1.018 0.333 0.398 10
1.097 0.357 0.318 8
1.186 0.384 0.205 9
1.067 0.345 0.185 8
1.147 0.329 0.102 8
1.118 0.251 0.047 9
0.929 0.16 0.032 8
0.699 0.057 0.105 9
0.601 -0.034 0.256 8
0.561 -0.125 0.325 8
0.505 -0.112 0.293 9
0.248 -0.203 0.277 7
-0.31 -0.292 0.164 10
-0.9 -0.399 -0.109 8
-1.344 -0.55 -0.437 8
-1.683 -0.719 -0.773 9
-1.972 -0.845 -1.075 8
-1.775 -0.761 -0.967 9
-2.118 -0.827 -1.132 8
-2.306 -0.952 -1.142 8
-2.283 -1.093 -1.031 9
-2.227 -1.149 -0.731 8
-2.126 -1.173 -0.364 9
-1.913 -1.056 -0.328 6
-1.727 -0.986 -0.066 10
-1.492 -0.828 0.253 9
-1.313 -0.618 0.652 8
-1.218 -0.36 0.915 9
-1.344 -0.09 0.942 8
-1.798 0.282 0.617 8
-1.618 0.254 0.556 9
-2.044 0.604 -0.094 8
-2.195 0.8 -0.868 8
-2.258 0.921 -1.443 9
-2.181 0.928 -1.455 8
-1.909 0.829 -0.95 7
-1.587 0.688 -0.192 10
-1.428 0.619 -0.173 8
-1.092 0.497 0.631 9
-0.694 0.389 1.256 8
-0.311 0.235 1.654 9
0.014 0.015 1.868 8
0.154 -0.207 1.881 8
0.085 -0.38 1.816 9
0.076 -0.342 1.635 8
0.031 -0.459 1.543 9
0.083 -0.507 1.391 8
0.151 -0.503 1.209 7
0.149 -0.471 0.996 10
0.126 -0.432 0.694 8
0.07 -0.398 0.204 9
0.063 -0.358 0.184 8
-0.035 -0.329 -0.337 8
-0.086 -0.305 -0.632 9
-0.046 -0.282 -0.628 8
-0.009 -0.26 -0.436 8
-0.09 -0.239 -0.137 9
-0.251 -0.25 0.238 8
-0.226 -0.225 0.214 9
-0.417 -0.291 0.619 6
-0.5 -0.31 0.955 10
-0.375 -0.258 1.028 9
-0.189 -0.178 0.892 8
-0.084 -0.079 0.624 9
-0.042 0.058 0.295 8
-0.038 0.052 0.265 8
-0.085 0.263 0.044 9
-0.185 0.479 -0.015 8
-0.238 0.627 0.102 9
-0.193 0.69 0.311 8
-0.13 0.718 0.427 8
-0.117 0.646 0.384 7
-0.116 0.673 0.343 10
-0.063 0.688 0.189 9
0.172 0.691 -0.003 8
0.466 0.689 -0.163 8
0.635 0.662 -0.366 9
0.631 0.578 -0.52 8
0.462 0.455 -0.42 9
0.415 0.409 -0.378 8
0.179 0.242 -0.087 8
-0.006 0.057 0.237 9
-0.103 -0.081 0.493 8
-0.133 -0.156 0.618 7
-0.119 -0.14 0.565 10
-0.043 -0.029 0.408 8
-0.039 -0.026 0.367 9
0.118 0.118 0.205 8
0.312 0.218 0.09 8
0.403 0.242 0.076 9
0.256 0.198 0.124 8
-0.042 0.03 0.241 9
-0.337 -0.266 0.458 8
-0.303 -0.239 0.412 8
-0.529 -0.506 0.622 9
-0.612 -0.641 0.78 7
-0.623 -0.659 0.857 10
-0.641 -0.585 0.715 8
-0.599 -0.373 0.392 8
-0.539 -0.075 0.063 9
-0.39 -0.067 0.057 8
-0.162 0.153 -0.186 9
0.021 0.28 -0.289 8
0.088 0.347 -0.26 8
0.042 0.315 -0.144 9
0.025 0.174 0.021 8
0.022 0.156 0.019 9
0.105 -0.075 0.152 6
0.19 -0.321 0.179 10
0.285 -0.477 0.029 9
0.396 -0.542 -0.224 8
0.385 -0.545 -0.407 8
0.244 -0.562 -0.412 9
0.219 -0.505 -0.371 8
0.035 -0.605 -0.227 9
-0.216 -0.707 -0.047 8
-0.448 -0.708 0.059 8
-0.458 -0.567 0.008 9
-0.202 -0.362 -0.212 8
-0.182 -0.326 -0.191 7
0.183 -0.184 -0.498 10
0.41 -0.109 -0.725 8
0.358 -0.072 -0.777 9
0.187 -0.078 -0.723 8
0.072 -0.106 -0.683 9
0.058 -0.101 -0.703 8
0.094 -0.018 -0.792 8
0.084 -0.016 -0.713 9
0.109 0.189 -0.812 8
0.217 0.446 -0.749 9
0.472 0.647 -0.56 8
0.693 0.757 -0.218 7
0.615 0.762 0.265 10
0.209 0.665 0.668 8
0.188 0.599 0.601 8
-0.32 0.427 0.879 9
-0.633 0.217 0.96 8
-0.638 0.018 0.791 9
-0.563 -0.081 0.554 8
-0.539 -0.09 0.42 8
-0.428 -0.071 0.407 9
-0.385 -0.063 0.366 8
-0.065 -0.101 0.516 9
0.413 -0.212 0.835 6
0.806 -0.307 1.201 10
1.009 -0.384 1.412 9
1.063 -0.425 1.313 8
0.891 -0.43 0.954 9
0.802 -0.387 0.859 8
0.369 -0.414 0.358 8
-0.204 -0.478 -0.112 9
-0.63 -0.531 -0.374 8
-0.647 -0.552 -0.445 9
-0.343 -0.529 -0.395 8
0.026 -0.454 -0.279 8
0.023 -0.409 -0.251 7
0.266 -0.272 -0.109 10
0.343 -0.113 -0.083 9
0.386 0.004 -0.219 8
0.397 0.085 -0.545 8
0.615 0.206 -0.931 9
0.965 0.413 -1.233 8
0.868 0.371 -1.109 8
1.02 0.538 -1.452 9
1.127 0.649 -1.555 8
1.247 0.769 -1.419 9
1.307 0.855 -1.282 8
1.281 0.899 -1.132 7
1.076 0.89 -0.995 10
0.969 0.801 -0.895 8
0.478 0.754 -0.751 9
-0.17 0.682 -0.717 8
-0.717 0.582 -0.824 8
-1.014 0.446 -0.889 9
-0.99 0.285 -0.877 8
-0.748 0.123 -0.844 9
-0.673 0.111 -0.759 8
-0.533 0.008 -0.68 8
-0.612 -0.007 -0.407 9
-0.699 -0.016 0.074 6
-0.705 -0.069 0.613 11
-0.704 -0.153 1.011 8
-0.798 -0.234 1.097 8
-0.718 -0.211 0.987 9
-0.86 -0.258 0.716 8
-0.906 -0.31 0.288 8
-0.719 -0.426 -0.143 9
-0.245 -0.514 -0.523 8
0.248 -0.533 -0.753 9
0.553 -0.598 -0.85 8
0.498 -0.539 -0.765 8
0.684 -0.738 -0.775 7
0.842 -0.976 -0.722 10
0.959 -1.115 -0.636 9
1.074 -1.162 -0.542 8
1.204 -1.173 -0.413 8
1.083 -1.055 -0.39 9
1.108 -0.995 -0.351 8
0.988 -0.868 -0.75 9
0.936 -0.776 -1.483 8
0.958 -0.688 -2.037 8
0.903 -0.593 -2.143 9
0.676 -0.518 -1.943 8
0.609 -0.466 -1.749 7
0.252 -0.407 -1.328 10
-0.012 -0.368 -0.684 8
-0.064 -0.338 0.044 9
0.146 -0.307 0.71 8
0.415 -0.255 1.059 8
0.546 -0.119 1.035 9
0.491 -0.107 0.931 8
0.542 0.026 0.683 9
0.542 0.198 0.35 8
0.563 0.379 0.025 8
0.595 0.5 -0.209 9
0.531 0.558 -0.349 7
0.37 0.491 -0.368 10
0.333 0.442 -0.331 8
0.068 0.286 -0.136 8
-0.28 0.099 0.195 9
-0.565 0.013 0.672 8
-0.723 0.1 1.338 9
-0.716 0.249 2.013 8
-0.401 0.387 2.542 8
-0.361 0.348 2.288 9
0.242 0.569 2.662 8
0.848 0.874 2.824 9
1.315 1.119 2.788 6
1.675 1.174 2.582 10
1.8 1.105 2.303 9
1.561 0.941 2.049 8
1.405 0.847 1.844 9
0.916 0.58 1.662 8
0.313 0.297 1.645 8
-0.353 0.004 1.804 9
-0.937 -0.272 2.012 8
-1.373 -0.33 2.18 9
-1.661 -0.16 2.027 8
-1.495 -0.144 1.824 8
-1.605 0.171 1.264 7
-1.557 0.514 0.455 10
-1.482 0.734 -0.375 8
-1.474 0.837 -0.934 9
-1.481 0.789 -1.019 8
-1.611 0.561 -0.505 9
-1.45 0.505 -0.454 8
-1.632 0.041 0.525 8
-1.373 -0.499 1.708 9
-0.78 -0.828 2.845 8
-0.342 -0.999 3.717 9
-0.176 -0.921 4.128 8
-0.159 -0.829 3.715 7
-0.166 -0.547 3.751 10
-0.27 -0.197 3.586 8
-0.377 0.202 3.216 9
-0.445 0.46 2.713 8
-0.555 0.524 2.298 8
-0.593 0.313 2.128 9
-0.279 -0.057 2.273 8
-0.251 -0.051 2.046 9
0.483 -0.309 2.274 8
1.054 -0.354 2.274 8
0.87 -0.245 1.983 9
0.135 -0.026 1.512 6
-0.613 0.29 1.057 10
-0.991 0.563 0.587 9
-0.892 0.506 0.528 8
-1.02 0.682 0.094 9
-1.157 0.7 -0.152 8
-1.071 0.503 -0.139 8
-0.453 0.257 -0.156 9
0.349 0.055 -0.433 8
0.788 -0.056 -0.892 9
0.709 -0.051 -0.802 8
0.576 -0.064 -1.336 8
-0.041 -0.098 -1.697 7
-0.783 -0.186 -1.83 10
-1.36 -0.301 -1.901 9
-1.809 -0.272 -2.074 8
-1.891 -0.435 -2.375 8
-1.702 -0.391 -2.138 9
-1.815 -0.64 -2.52 8
-1.932 -0.796 -2.918 9
-1.536 -1.032 -3.258 8
-1.078 -1.079 -3.28 8
-0.639 -0.981 -3.03 9
-0.575 -0.883 -2.727 8
0.031 -0.806 -2.502 7
0.573 -0.744 -2.158 10
0.772 -0.682 -1.84 8
0.687 -0.657 -1.85 9
0.409 -0.657 -2.096 8
0.081 -0.722 -2.341 8
0.073 -0.649 -2.107 9
-0.165 -0.799 -2.359 8
-0.301 -0.995 -2.56 9
-0.684 -1.322 -2.665 8
-0.885 -1.42 -2.47 8
-0.383 -1.262 -1.885 9
-0.345 -1.136 -1.696 7
0.167 -1.126 -1.206 10
0.221 -1.147 -1.071 8
0.09 -0.896 -1.029 8
0.112 -0.495 -0.853 9
0.136 -0.301 -0.845 8
0.101 -0.269 -1.248 9
0.082 -0.345 -1.9 8
0.074 -0.311 -1.71 8
0.087 -0.476 -2.313 9
0.061 -0.586 -2.451 8
0.051 -0.624 -1.854 9
0.044 -0.36 -1.066 6
-0.094 0.203 -0.757 10
-0.116 0.575 -0.845 9
-0.104 0.517 -0.761 8
0.098 0.493 -0.783 9
0.37 0.062 -0.397 8
0.514 -0.433 0.4 8
0.56 -0.693 0.82 9
0.421 -0.86 0.415 8
0.025 -0.984 -0.121 8
0.022 -0.885 -0.109 9
-0.33 -0.865 -0.25 8
-0.588 -0.803 -0.139 7
-0.769 -0.871 -0.045 10
-0.81 -0.966 0.189 8
-0.659 -0.909 0.486 9
-0.323 -0.686 0.52 8
-0.29 -0.617 0.468 9
0.209 -0.309 0.32 8
0.749 -0.156 0.305 8
1.078 -0.22 0.5 9
1.023 -0.291 0.663 8
0.538 -0.268 0.663 9
-0.147 -0.133 0.603 8
-0.132 -0.12 0.543 7
-0.625 -0.023 0.508 10
-0.786 0.045 0.434 8
-0.695 0.254 0.167 9
-0.332 0.5 -0.087 8
0.124 0.633 -0.083 8
0.372 0.688 0.004 9
0.335 0.619 0.003 8
0.285 0.737 0.008 9
0.03 0.848 0.009 8
-0.143 0.676 0.083 8
-0.292 0.414 0.12 9
-0.263 0.373 0.108 6
-1.129 0.62 0.614 10
-1.016 0.558 0.553 9
-1.423 0.849 0.881 8
-1.613 1.182 1.121 9
-1.508 1.42 1.37 8
-0.992 1.201 1.416 8
-0.366 0.854 1.269 9
-0.329 0.741 1.115 8
-0.002 0.667 1.004 9
0.051 0.709 0.837 8
0.009 0.81 0.703 8
0.012 0.865 0.62 7
0.114 0.854 0.593 10
0.259 0.815 0.63 9
0.233 0.733 0.567 8
0.339 0.748 0.583 8
0.437 0.78 0.5 9
0.569 0.76 0.367 8
0.733 0.721 0.249 9
0.906 0.66 0.165 8
1.099 0.549 0.165 8
0.989 0.494 0.148 9
1.135 0.318 0.22 8
1.082 0.137 0.32 7
0.87 0.017 0.457 10
0.632 -0.07 0.448 8
0.461 -0.122 0.336 9
0.325 -0.072 0.275 8
0.293 -0.065 0.248 8
0.27 0.008 0.208 9
0.306 0.015 0.179 8
0.18 -0.021 0.148 9
-0.059 -0.073 0.171 8
-0.279 -0.108 0.21 8
-0.4 -0.133 0.115 9
-0.36 -0.12 0.103 6
-0.414 -0.112 -0.077 11
-0.448 -0.065 -0.19 8
-0.483 -0.01 -0.214 8
-0.511 0.045 -0.202 9
-0.508 0.083 -0.175 8
-0.472 0.099 -0.145 9
-0.425 0.089 -0.131 8
-0.345 0.058 -0.104 8
-0.255 0.002 0.048 9
-0.205 0.009 0.229 8
-0.125 0.009 0.17 8
-0.001 -0.02 0.025 7
0.095 -0.029 -0.012 10
0.085 -0.026 -0.011 9
0.132 -0.075 0.051 8
0.114 -0.144 0.169 8
0.056 -0.188 0.246 9
0.038 -0.21 0.282 8
0.061 -0.191 0.346 9
0.087 -0.144 0.449 8
0.078 -0.129 0.404 8
0.122 -0.074 0.505 9
0.181 -0.048 0.559 8
0.21 -0.047 0.579 7
0.204 -0.061 0.56 10
0.185 -0.118 0.519 8
0.133 -0.163 0.459 9
0.12 -0.147 0.413 8
0.055 -0.17 0.33 9
-0.015 -0.177 0.202 8
-0.072 -0.146 -0.032 8
-0.084 -0.097 -0.294 9
-0.096 -0.016 -0.471 8
-0.107 0.092 -0.575 8
-0.096 0.082 -0.517 9
-0.077 0.151 -0.56 7
-0.066 0.173 -0.495 10
-0.073 0.137 -0.349 8
-0.091 0.028 -0.156 8
-0.123 -0.071 -0.026 9
-0.161 -0.119 -0.036 8
-0.145 -0.107 -0.033 9
-0.185 -0.145 -0.027 8
-0.2 -0.16 0.082 8
-0.186 -0.139 0.155 9
-0.128 -0.107 0.067 8
0.004 -0.064 -0.107 9
0.003 -0.057 -0.096 6
0.114 -0.006 -0.272 10
0.103 0.032 -0.368 9
-0.054 0.076 -0.349 8
-0.266 0.088 -0.304 9
-0.357 0.015 -0.288 8
-0.407 0.03 -0.359 8
-0.366 0.027 -0.403 9
-0.357 0.025 -0.362 8
-0.166 0.122 -0.239 9
0.052 0.11 -0.107 8
0.21 0.117 -0.033 8
0.287 0.099 -0.002 7
0.223 0.023 -0.035 10
0.2 0.021 -0.031 9
-0.038 -0.084 -0.087 8
-0.297 -0.142 -0.123 8
-0.423 -0.147 -0.124 9
-0.386 -0.142 -0.119 8
-0.233 -0.161 -0.056 8
-0.144 -0.166 0.225 9
-0.13 -0.149 0.202 8
-0.185 -0.128 0.585 9
-0.29 -0.111 0.836 8
-0.354 -0.105 0.933 7
-0.336 -0.097 0.906 10
-0.182 -0.088 0.805 8
0.052 -0.077 0.671 9
0.046 -0.069 0.603 8
0.136 -0.063 0.505 8
-0.015 -0.046 0.509 9
-0.392 -0.028 0.478 8
-0.82 -0.003 0.393 9
-1.036 0.088 0.218 8
-0.971 0.116 -0.095 8
-0.874 0.104 -0.086 9
-0.63 0.05 -0.319 6
-0.312 0.026 -0.407 10
-0.059 0.002 -0.373 9
0.036 -0.018 -0.167 8
0.042 -0.032 0.092 9
0.045 -0.026 0.229 8
0.04 -0.023 0.206 8
0.033 0.009 0.179 9
-0.035 0.02 -0.013 8
-0.191 -0.006 -0.17 9
-0.364 -0.005 -0.237 8
-0.439 -0.003 -0.31 8
-0.395 -0.003 -0.279 7
# end
#Thu Feb 26 20:25:31 GMT+08:00 20154
