# Supplementary material for: Abnormal Gait Behavior Detection for Elderly Based on Enhanced Wigner-Ville Analysis and Cloud Incremental SVM Learning
Source: Hindawi journal article supplement (doi:10.1155/2016/5869238), 2016-01-01
Supplement: f1 [file 5869238.f1.zip › Supplementary Materials/Original Data/Lying on a bed then standing/original__45.txt]

# Accelerometer Values
# filename:  original__45.txt
# Saving start time: Thu Feb 26 20:25:43 GMT+08:00 2015

# sensor resolution: 0.0095825195m/s^2
#Sensorvendor: KIONIX, name: KX023 Accelerometer, type: 1,version : 1, range 39.240005

# X value, Y value, Z value, time diff in ms
-0.158 -0.328 0.27 9
0.015 -0.284 0.138 8
0.087 -0.153 0.013 8
-0.007 0.026 -0.159 7
-0.106 0.155 -0.266 10
-0.163 0.199 -0.226 9
-0.147 0.179 -0.203 8
-0.171 0.136 -0.046 8
-0.162 0.037 0.135 9
-0.143 -0.062 0.261 8
-0.119 -0.134 0.318 9
-0.055 -0.16 0.307 8
0.079 -0.117 0.215 8
0.071 -0.105 0.194 9
0.182 0.004 0.066 8
0.16 0.124 -0.068 7
0.05 0.201 -0.21 10
-0.051 0.237 -0.337 8
-0.106 0.241 -0.453 9
-0.125 0.236 -0.546 8
-0.112 0.213 -0.492 8
-0.113 0.217 -0.548 9
-0.096 0.206 -0.546 8
-0.035 0.165 -0.463 9
0.047 0.104 -0.296 8
0.118 0.046 -0.078 8
0.106 0.042 -0.07 9
0.127 0.011 0.11 7
0.088 -0.052 0.206 10
0.02 -0.132 0.27 8
-0.039 -0.177 0.284 8
-0.042 -0.228 0.168 9
0.05 -0.255 -0.001 8
0.045 -0.229 -0.001 9
0.182 -0.163 -0.084 8
0.255 -0.098 -0.122 8
0.335 -0.161 -0.118 9
0.323 -0.104 -0.207 8
0.137 0.117 -0.373 8
0.123 0.105 -0.336 7
-0.039 0.204 -0.34 10
-0.142 0.199 -0.136 9
-0.176 0.138 0.118 8
-0.164 0.043 0.051 8
-0.154 0.052 -0.323 9
-0.056 0.162 -0.713 8
0.269 0.079 -0.986 9
0.242 0.071 -0.887 8
0.713 -0.213 -1.028 8
1.005 -0.171 -1.065 9
0.946 0.187 -0.929 8
0.653 0.42 -0.55 7
0.295 0.448 -0.145 10
0.009 0.344 0.101 8
0.008 0.309 0.09 9
0.029 0.017 0.061 8
-0.075 -0.104 -0.276 9
-0.203 0.017 -0.584 8
-0.089 0.123 -0.702 8
-0.063 0.282 -0.755 9
-0.055 0.398 -0.745 8
-0.049 0.358 -0.67 9
-0.034 0.404 -0.593 8
-0.064 0.399 -0.524 7
-0.16 0.38 -0.474 10
-0.293 0.348 -0.414 8
-0.418 0.296 -0.352 8
-0.475 0.209 -0.308 9
-0.427 0.188 -0.277 8
-0.55 0.106 -0.366 9
-0.534 -0.033 -0.54 8
-0.23 -0.328 -0.713 8
0.08 -0.6 -0.922 9
0.283 -0.719 -1.05 8
0.385 -0.78 -0.936 9
0.347 -0.702 -0.842 6
0.332 -0.801 -0.474 10
0.268 -0.952 -0.064 9
0.211 -1.137 0.162 8
0.2 -1.258 0.177 9
0.267 -1.259 0.044 8
0.348 -1.195 -0.198 8
0.313 -1.075 -0.178 9
0.342 -0.992 -0.506 8
0.337 -0.922 -0.861 9
0.356 -0.872 -1.087 8
0.343 -0.808 -1.064 8
0.308 -0.728 -0.958 7
0.077 -0.702 -0.557 10
0.069 -0.632 -0.501 8
-0.051 -0.617 -0.289 9
-0.13 -0.553 -0.309 8
-0.057 -0.484 -0.538 9
0.145 -0.442 -0.795 8
0.352 -0.376 -0.929 8
0.525 -0.293 -0.95 9
0.472 -0.264 -0.855 8
0.542 -0.201 -0.828 9
0.473 -0.156 -0.763 8
0.326 -0.128 -0.676 7
0.184 -0.103 -0.539 10
0.114 -0.064 -0.372 8
0.102 -0.058 -0.335 9
0.083 0.022 -0.208 8
0.091 0.184 -0.165 8
0.257 0.367 -0.201 9
0.581 0.552 -0.17 8
0.915 0.718 0.036 9
1.024 0.839 0.303 8
0.921 0.755 0.272 8
0.79 0.815 0.393 9
0.517 0.774 0.384 6
0.138 0.713 0.401 11
-0.204 0.636 0.429 8
-0.398 0.545 0.482 8
-0.366 0.479 0.596 9
-0.329 0.431 0.537 8
-0.06 0.445 0.618 9
0.228 0.628 0.738 8
0.323 0.89 0.924 8
0.298 1.09 1.033 9
0.19 1.233 1.105 8
-0.022 1.355 1.133 8
-0.019 1.219 1.02 7
-0.221 1.39 0.958 10
-0.278 1.537 0.825 9
-0.145 1.595 0.684 8
0.152 1.531 0.675 8
0.548 1.371 0.891 9
0.972 1.32 1.121 8
0.874 1.188 1.009 9
1.254 1.265 1.084 8
1.427 1.36 1.077 8
1.37 1.439 1.146 9
1.197 1.526 1.324 8
0.97 1.65 1.491 7
0.789 1.761 1.525 10
0.71 1.585 1.372 8
0.619 1.665 1.132 9
0.511 1.731 0.501 8
0.493 1.848 -0.303 9
0.587 1.933 -0.788 8
0.603 1.989 -0.86 8
0.472 2.178 -0.582 9
0.425 1.96 -0.524 8
0.272 2.2 0.032 8
0.209 2.304 0.576 9
0.092 2.328 0.894 7
-0.174 2.273 0.954 10
-0.491 2.25 0.733 8
-0.508 2.337 0.552 8
-0.457 2.103 0.497 9
0.098 2.187 0.691 8
0.852 2.162 0.949 9
1.396 2.041 1.239 8
1.482 1.84 1.619 8
0.98 1.409 1.889 9
0.092 0.723 2.09 8
0.083 0.651 1.881 9
-0.838 -0.064 2.026 6
-1.421 -0.671 2.029 10
-1.334 -1.135 2.053 9
-0.727 -1.422 2.195 8
-0.074 -1.554 2.262 9
0.293 -1.62 1.92 8
0.264 -1.458 1.728 8
0.317 -1.542 1.028 9
0.403 -1.674 0.052 8
0.731 -1.855 -1.018 9
1.074 -2.122 -1.958 8
1.189 -2.446 -2.723 8
1.07 -2.201 -2.451 7
1.114 -2.49 -2.865 10
1.283 -2.528 -2.753 9
1.63 -2.213 -2.246 8
2.079 -1.804 -1.646 8
2.37 -1.465 -1.134 9
2.216 -1.083 -0.756 8
1.994 -0.974 -0.633 8
1.487 -0.623 -0.57 9
0.866 -0.376 -0.875 8
0.394 -0.226 -1.548 9
0.12 -0.275 -2.457 8
-0.253 -0.576 -3.335 7
-0.887 -1.107 -3.95 10
-0.798 -0.996 -3.555 8
-1.563 -1.705 -3.914 9
-2.274 -2.426 -3.684 8
-2.844 -2.874 -2.705 8
-3.147 -2.958 -1.258 9
-3.003 -2.855 0.22 8
-2.41 -2.647 1.455 9
-2.169 -2.382 1.309 8
-1.499 -2.12 1.863 8
-1.058 -1.705 1.495 9
-0.852 -1.168 0.572 6
-0.699 -0.622 -0.547 11
-0.451 -0.069 -1.522 8
-0.109 0.363 -2.053 8
-0.098 0.327 -1.848 9
0.206 0.548 -1.759 8
0.371 0.682 -1.1 8
0.229 0.842 -0.337 9
-0.012 1.091 0.31 8
-0.052 1.367 0.642 9
-0.063 1.586 0.36 8
-0.057 1.427 0.324 8
-0.063 1.59 -0.43 7
-0.107 1.61 -1.393 10
-0.342 1.469 -2.256 9
-0.602 1.086 -2.72 8
-0.934 0.7 -2.821 8
-1.459 0.486 -2.483 9
-1.313 0.437 -2.234 8
-1.827 0.321 -1.361 9
-2.091 0.346 -0.369 8
-1.971 0.475 0.35 8
-1.603 0.627 0.646 9
-1.138 0.733 0.575 8
-1.024 0.66 0.517 7
-0.615 0.733 0.317 10
-0.386 0.752 0.215 8
-0.267 0.759 0.26 9
-0.171 0.747 0.398 8
-0.146 0.771 0.686 8
-0.15 0.806 0.825 9
-0.097 0.816 0.598 8
-0.087 0.734 0.538 9
-0.005 0.82 0.107 8
0.072 0.958 -0.445 8
0.12 1.039 -0.911 9
0.215 0.98 -0.847 7
0.417 0.706 -0.071 10
0.638 0.3 1.197 8
0.574 0.27 1.077 8
0.784 -0.209 2.511 9
0.671 -0.465 3.615 8
0.465 -0.548 4.108 9
0.536 -0.748 3.81 8
0.595 -0.832 2.774 8
0.568 -0.781 1.267 9
0.511 -0.703 1.141 8
0.478 -0.625 -0.477 9
0.482 -0.583 -1.713 6
0.388 -0.584 -2.407 10
0.009 -0.655 -2.512 9
-0.516 -0.82 -2.168 8
-0.94 -0.857 -1.641 9
-0.846 -0.771 -1.477 8
-0.989 -0.588 -0.983 8
-0.758 -0.384 -0.676 9
-0.273 -0.26 -0.469 8
0.249 -0.165 -0.285 8
0.571 -0.111 -0.129 9
0.574 -0.127 0.106 8
0.517 -0.115 0.096 7
0.241 -0.207 0.349 10
-0.107 -0.428 0.5 8
-0.363 -0.642 0.613 9
-0.454 -0.746 0.662 8
-0.355 -0.819 0.555 9
-0.17 -0.811 0.332 8
-0.153 -0.73 0.299 8
0.04 -0.658 -0.064 9
0.248 -0.572 -0.409 8
0.441 -0.447 -0.607 9
0.521 -0.321 -0.716 8
0.469 -0.289 -0.644 7
0.402 -0.206 -0.609 10
0.328 -0.118 -0.548 8
0.322 -0.016 -0.276 9
0.309 0.13 0.043 8
0.318 0.326 0.419 8
0.432 0.469 0.592 9
0.659 0.593 0.558 8
0.593 0.534 0.502 9
0.742 0.676 0.309 8
0.617 0.76 0.05 8
0.277 0.785 -0.157 9
-0.183 0.745 -0.244 6
-0.663 0.645 -0.141 10
-0.971 0.567 0.041 9
-0.874 0.51 0.037 8
-0.923 0.47 0.129 9
-0.771 0.425 0.15 8
-0.565 0.355 0.169 8
-0.363 0.269 0.165 9
-0.201 0.19 0.147 8
-0.132 0.078 0.237 9
-0.119 0.07 0.213 8
-0.109 -0.056 0.484 8
0.002 -0.133 0.859 7
0.291 -0.141 1.31 10
0.716 -0.142 1.679 9
1.221 -0.08 1.79 8
1.668 0.072 1.675 8
1.501 0.065 1.507 9
1.711 0.172 1.169 8
1.6 0.163 0.719 9
1.372 0.127 0.314 8
1.134 0.06 -0.035 8
0.907 -0.033 -0.301 9
0.845 -0.099 -0.451 8
0.761 -0.089 -0.406 7
0.915 -0.147 -0.346 10
1.131 -0.176 -0.045 8
1.247 -0.181 0.273 9
1.231 -0.176 0.403 8
1.148 -0.166 0.3 8
0.961 -0.151 -0.037 9
0.865 -0.136 -0.033 8
0.64 -0.125 -0.462 9
0.536 -0.118 -0.761 8
0.598 -0.123 -0.741 8
0.747 -0.145 -0.413 9
0.927 -0.189 0.041 7
1.11 -0.297 0.431 10
0.999 -0.267 0.388 8
1.089 -0.338 0.564 8
1.069 -0.311 0.435 9
1.011 -0.235 -0.041 8
0.935 -0.138 -0.698 9
0.796 -0.113 -1.165 8
0.57 -0.204 -1.29 8
0.513 -0.184 -1.161 9
0.246 -0.387 -0.842 8
-0.031 -0.594 -0.147 8
-0.338 -0.746 0.488 7
-0.523 -0.804 0.904 10
-0.404 -0.746 1.112 9
-0.065 -0.622 1.053 8
-0.058 -0.56 0.947 8
0.285 -0.394 0.746 9
0.478 -0.23 0.561 8
0.563 -0.104 0.395 9
0.606 -0.024 0.203 8
0.602 0.009 -0.009 8
0.542 0.008 -0.008 9
0.466 0.019 -0.156 8
0.31 0.052 -0.258 7
0.164 0.153 -0.36 10
0.107 0.318 -0.467 8
0.117 0.464 -0.641 9
0.171 0.528 -0.759 8
0.154 0.475 -0.683 9
0.232 0.491 -0.572 8
0.28 0.478 -0.292 8
0.283 0.445 0.064 9
0.272 0.409 0.398 8
0.259 0.395 0.57 8
0.227 0.394 0.45 9
0.205 0.355 0.405 7
0.017 0.315 0.08 10
-0.271 0.267 -0.159 8
-0.466 0.203 -0.267 8
-0.511 0.102 -0.24 9
-0.319 -0.038 -0.001 8
-0.014 -0.149 0.291 9
-0.013 -0.134 0.262 8
0.151 -0.189 0.444 8
0.071 -0.245 0.521 9
-0.195 -0.282 0.511 8
-0.423 -0.343 0.401 9
-0.478 -0.432 0.252 6
-0.462 -0.527 0.05 10
-0.415 -0.475 0.045 9
-0.419 -0.566 -0.159 8
-0.661 -0.672 -0.302 9
-1.109 -0.708 -0.455 8
-1.569 -0.614 -0.724 8
-1.725 -0.51 -1.047 9
-1.555 -0.4 -1.208 8
-1.399 -0.36 -1.087 9
-1.108 -0.242 -1.043 8
-0.541 -0.173 -0.833 8
0.018 -0.105 -0.559 7
0.165 -0.024 -0.431 10
-0.122 0.017 -0.571 9
-0.53 -0.031 -0.729 8
-0.477 -0.028 -0.656 8
-0.722 -0.113 -0.683 9
-0.773 -0.107 -0.656 8
-0.688 -0.022 -0.502 8
-0.449 0.066 -0.162 9
-0.069 0.065 0.205 8
0.197 0.205 0.452 9
0.177 0.184 0.407 8
0.183 0.395 0.467 7
0.105 0.47 0.272 10
0.095 0.504 0.05 8
0.242 0.624 0.108 9
0.504 0.707 0.348 8
0.773 0.637 0.599 8
0.696 0.573 0.539 9
0.937 0.522 0.744 8
1.016 0.477 0.789 9
0.916 0.435 0.71 8
0.843 0.406 0.559 8
0.867 0.391 0.333 9
0.78 0.352 0.3 6
0.763 0.345 0.097 11
0.653 0.398 -0.003 8
0.548 0.39 -0.027 8
0.485 0.265 0.023 9
0.417 0.151 0.15 8
0.335 0.059 0.208 8
0.302 0.053 0.187 9
0.245 -0.017 0.094 8
0.237 -0.056 -0.033 9
0.264 -0.091 -0.095 8
0.284 -0.134 -0.065 8
0.293 -0.188 0.025 7
0.288 -0.266 0.151 10
0.259 -0.24 0.136 9
0.246 -0.308 0.196 8
0.215 -0.363 0.112 8
0.093 -0.377 0.017 9
-0.052 -0.338 -0.052 8
-0.143 -0.272 -0.124 9
-0.22 -0.164 -0.171 8
-0.198 -0.147 -0.154 8
-0.272 -0.072 -0.161 9
-0.306 -0.091 -0.129 8
-0.276 -0.171 -0.083 7
-0.195 -0.256 -0.036 10
-0.123 -0.311 0.003 8
-0.101 -0.333 -0.007 9
-0.09 -0.3 -0.006 8
-0.109 -0.296 -0.044 8
-0.159 -0.278 -0.057 9
-0.209 -0.259 -0.047 8
-0.239 -0.241 -0.015 9
-0.289 -0.214 -0.018 8
-0.394 -0.183 -0.066 8
-0.355 -0.164 -0.059 9
-0.397 -0.159 -0.083 7
-0.269 -0.143 -0.115 10
-0.109 -0.105 -0.126 8
-0.043 -0.062 -0.078 8
-0.023 -0.042 -0.044 9
0.058 -0.048 -0.013 8
0.052 -0.043 -0.011 9
0.22 -0.083 0.01 8
0.285 0.078 0.062 8
0.272 0.317 0.096 9
0.352 0.408 0.054 8
0.483 0.473 0.015 9
0.435 0.426 0.013 6
0.557 0.51 -0.073 10
0.662 0.64 -0.335 9
0.866 0.746 -0.701 8
1.169 0.839 -0.918 9
1.502 0.893 -0.788 8
1.834 0.905 -0.387 8
1.651 0.814 -0.348 9
1.847 0.811 -0.314 8
1.812 0.783 0.307 9
1.632 0.733 0.395 8
1.413 0.668 0.416 8
1.297 0.609 0.411 7
1.281 0.55 0.319 10
1.153 0.495 0.287 8
1.139 0.423 0.197 9
1.146 0.379 0.16 8
1.234 0.346 0.057 9
1.259 0.281 -0.128 8
1.156 0.189 -0.27 8
0.953 -0.015 -0.308 9
0.857 -0.014 -0.277 8
0.637 -0.272 -0.179 9
0.513 -0.457 -0.021 8
0.406 -0.586 0.105 7
0.151 -0.707 0.162 10
-0.204 -0.814 0.027 8
-0.54 -0.826 -0.248 9
-0.486 -0.744 -0.223 8
-0.893 -0.776 -0.493 8
-1.482 -0.815 -0.675 9
-2.113 -0.772 -0.69 8
-2.544 -0.715 -0.61 9
-2.652 -0.637 -0.42 8
-2.417 -0.554 -0.073 8
-2.175 -0.499 -0.066 9
-1.74 -0.442 0.288 6
-1.247 -0.397 0.571 10
-0.992 -0.322 0.775 9
-1.258 -0.214 0.76 8
-1.968 -0.17 0.528 9
-2.832 -0.205 0.226 8
-2.549 -0.184 0.203 8
-3.304 -0.24 -0.061 9
-3.656 -0.301 -0.283 8
-3.76 -0.363 -0.399 9
-3.885 -0.432 -0.384 8
-3.725 -0.511 -0.321 8
-3.353 -0.46 -0.289 7
-2.93 -0.492 -0.104 10
-2.593 -0.439 0.243 9
-2.229 -0.409 0.684 8
-1.686 -0.384 1.093 8
-1.186 -0.363 1.409 9
-0.913 -0.392 1.521 8
-0.726 -0.418 1.298 9
-0.653 -0.376 1.169 8
-0.269 -0.345 0.812 8
0.26 -0.247 0.503 9
0.61 -0.147 0.266 8
0.696 -0.01 0.117 7
0.667 0.229 -0.004 10
0.635 0.519 -0.173 8
0.571 0.467 -0.155 9
0.654 0.68 -0.391 8
0.887 0.744 -0.673 8
0.997 0.693 -0.873 9
0.709 0.53 -0.813 8
0.12 0.28 -0.483 9
0.108 0.252 -0.055 8
-0.557 0.227 -0.05 8
-1.102 -0.219 0.248 9
-1.331 -0.333 0.335 7
-1.068 -0.408 0.22 10
-0.422 -0.469 -0.007 8
0.149 -0.569 -0.181 8
0.134 -0.512 -0.163 9
0.308 -0.733 -0.141 8
0.017 -0.986 0.153 9
-0.527 -1.136 0.641 8
-0.947 -1.146 1.111 8
-1.1 -1.036 1.334 9
-1.029 -0.736 1.117 8
-0.926 -0.662 1.005 9
-0.652 -0.228 0.52 6
-0.293 0.153 0.053 10
0.098 0.446 -0.192 9
0.529 0.634 -0.121 8
0.792 0.685 0.196 9
0.721 0.622 0.644 8
0.649 0.56 0.58 8
0.338 0.486 1.03 9
-0.026 0.455 1.398 8
-0.316 0.563 1.578 8
-0.393 0.864 1.593 9
-0.289 1.246 1.516 8
-0.26 1.121 1.365 7
-0.145 1.4 1.168 10
-0.122 1.52 0.976 8
-0.315 1.52 0.811 9
-0.654 1.376 0.504 8
-0.998 1.147 0.152 9
-1.148 0.821 -0.238 8
-1.017 0.433 -0.576 8
-0.915 0.39 -0.518 9
-0.702 0.074 -0.529 8
-0.323 -0.262 -0.226 9
0.253 -0.664 0.384 8
0.805 -1.102 1.19 7
1.151 -1.561 1.783 10
1.253 -1.929 1.962 8
1.127 -1.736 1.765 9
1.098 -1.786 1.54 8
1.129 -1.671 0.971 8
1.223 -1.632 0.11 9
1.027 -1.232 -0.741 8
0.621 -0.717 -1.309 8
0.292 -0.414 -1.52 9
0.263 -0.373 -1.368 8
0.001 -0.14 -1.095 9
-0.13 0.025 -0.421 6
0.089 0.16 0.227 10
0.623 0.326 0.394 9
1.184 0.613 0.042 8
1.607 0.904 -0.552 9
1.446 0.814 -0.497 8
1.614 0.979 -1.112 8
1.602 0.916 -1.652 9
1.385 0.756 -2.015 8
0.957 0.627 -2.131 9
0.645 0.452 -1.958 8
0.581 0.407 -1.762 8
0.48 0.215 -1.322 7
0.538 0.016 -0.763 10
0.712 -0.166 -0.313 9
0.846 -0.269 -0.005 8
0.68 -0.316 0.135 8
0.149 -0.377 0.117 9
0.134 -0.339 0.105 8
-0.611 -0.38 0.04 9
-1.346 -0.337 -0.03 8
-1.853 -0.233 -0.086 8
-1.962 -0.056 -0.009 9
-1.593 0.222 0.318 8
-1.434 0.2 0.286 7
-0.712 0.475 0.807 10
0.077 0.62 1.417 8
0.631 0.642 2.052 9
0.81 0.608 2.659 8
0.598 0.56 3.057 8
0.23 0.53 3.129 9
0.011 0.597 2.983 8
0.01 0.537 2.685 9
0.096 0.718 2.477 8
0.576 0.925 2.127 8
1.288 1.091 1.679 9
1.736 1.293 1.291 7
1.708 1.44 0.86 10
1.48 1.446 0.423 8
1.332 1.301 0.381 8
1.155 1.285 0.236 9
1.025 1.235 0.631 8
1.108 1.008 1.339 9
1.246 0.775 2.067 8
1.088 0.763 2.612 8
0.764 0.721 2.769 9
0.688 0.649 2.492 8
0.129 0.566 2.479 8
-0.634 0.523 2.205 7
-1.233 0.449 1.496 10
-1.431 0.352 0.661 9
-1.193 0.248 0.11 8
-0.869 0.108 -0.064 8
-0.782 0.097 -0.057 9
-0.809 -0.076 0.144 8
-1.192 -0.269 0.503 9
-1.647 -0.516 0.731 8
-1.91 -0.749 0.718 8
-1.787 -0.876 0.405 9
-1.254 -0.827 -0.148 8
-1.129 -0.745 -0.133 7
-0.547 -0.556 -0.831 10
-0.197 -0.43 -1.41 8
-0.106 -0.417 -1.55 9
-0.275 -0.518 -1.334 8
-0.585 -0.782 -1.106 9
-0.821 -1.11 -1.124 8
-0.739 -0.999 -1.012 8
-0.8 -1.325 -1.28 9
-0.754 -1.702 -1.583 8
-0.691 -2.059 -1.82 8
-0.703 -2.338 -1.786 9
-0.633 -2.104 -1.607 7
-0.785 -2.592 -1.163 10
-0.706 -2.332 -1.047 8
-0.834 -2.232 -0.932 8
-0.641 -2.079 -0.93 9
-0.499 -1.904 -1.166 8
-0.431 -1.745 -1.652 9
-0.408 -1.607 -2.053 8
-0.367 -1.446 -1.848 8
-0.309 -1.368 -1.973 9
-0.16 -1.353 -1.881 8
0.155 -1.289 -1.638 9
0.573 -1.17 -1.441 6
0.824 -0.936 -0.991 10
0.884 -0.49 -0.491 9
0.796 -0.441 -0.442 8
0.573 0.12 -0.805 9
0.348 0.143 -1.407 8
0.236 -0.618 -1.524 8
-0.026 -1.508 -1.423 9
-0.385 -2.06 -1.297 8
-0.81 -2.066 -1.06 9
-0.729 -1.859 -0.954 8
-1.04 -1.384 -0.677 8
-1.111 -0.694 -0.549 7
-1.021 -0.223 -0.684 10
-0.789 -0.142 -0.992 9
-0.496 -0.263 -1.298 8
-0.283 -0.446 -1.369 8
-0.255 -0.401 -1.232 9
-0.156 -0.709 -1.008 8
-0.188 -1.032 -0.665 8
-0.347 -1.079 -0.275 9
-0.511 -0.773 0.06 8
-0.555 -0.384 0.236 9
-0.397 -0.102 0.275 8
-0.357 -0.092 0.248 7
-0.007 0.086 0.248 10
0.426 0.12 0.261 8
0.846 -0.022 0.267 9
1.1 -0.278 0.244 8
1.144 -0.457 0.153 8
1.037 -0.468 0.027 9
0.934 -0.421 0.024 8
0.78 -0.296 -0.099 9
0.667 -0.044 -0.235 8
0.616 0.251 -0.398 8
0.591 0.462 -0.533 9
0.532 0.416 -0.48 6
0.484 0.699 -0.513 11
0.435 0.629 -0.461 8
0.446 0.722 -0.4 8
0.459 0.753 -0.311 9
0.452 0.732 -0.233 8
0.415 0.722 -0.194 8
0.338 0.777 -0.144 9
0.146 0.866 -0.119 8
0.131 0.779 -0.107 9
-0.157 0.895 -0.025 8
-0.448 1.039 0.169 8
-0.73 1.163 0.36 7
-1.013 1.259 0.479 10
-1.209 1.349 0.603 9
-1.088 1.214 0.542 8
-1.154 1.309 0.705 8
-1.112 1.345 0.852 9
-0.908 1.31 0.887 8
-0.627 1.32 0.798 9
-0.418 1.353 0.706 8
-0.229 1.3 0.755 8
-0.206 1.17 0.679 9
-0.041 1.079 0.844 8
0.051 0.943 0.935 7
0.077 0.748 1.054 10
0.036 0.592 1.221 8
-0.012 0.486 1.24 9
-0.003 0.373 1.092 8
-0.003 0.336 0.983 8
0.044 0.237 0.788 9
0.12 0.153 0.665 8
0.289 0.004 0.555 9
0.463 -0.185 0.734 8
0.434 -0.234 1.266 8
0.268 -0.269 1.656 9
0.242 -0.242 1.49 7
0.044 -0.328 1.631 10
-0.189 -0.343 1.579 8
-0.389 -0.313 1.318 8
-0.489 -0.209 0.87 9
-0.464 -0.054 0.344 8
-0.368 0.074 -0.198 9
-0.331 0.067 -0.178 8
-0.263 0.099 -0.579 8
-0.242 0.002 -0.682 9
-0.319 -0.157 -0.5 8
-0.473 -0.285 -0.155 9
-0.603 -0.417 0.183 6
-0.701 -0.504 0.394 10
-0.631 -0.454 0.354 9
-0.598 -0.435 0.329 8
-0.429 -0.345 0.074 9
-0.243 -0.207 -0.308 8
-0.046 -0.025 -0.626 8
0.135 0.134 -0.768 9
0.225 0.167 -0.723 8
0.202 0.15 -0.651 8
0.162 0.124 -0.375 9
0.087 0.048 -0.031 8
-0.027 -0.012 0.137 7
-0.18 0.014 0.188 10
-0.232 0.018 0.264 8
-0.14 0.002 0.342 9
-0.126 0.002 0.308 8
0.037 -0.019 0.353 9
0.176 -0.06 0.392 8
0.272 -0.073 0.45 8
0.365 -0.054 0.492 9
0.482 -0.027 0.559 8
0.434 -0.024 0.696 9
0.51 0.05 0.626 8
0.455 0.119 0.633 7
0.271 0.115 0.474 10
0.023 0.053 0.325 8
-0.177 -0.035 0.162 9
-0.342 0.046 -0.17 8
-0.308 0.041 -0.153 8
-0.397 0.179 -0.407 9
-0.298 0.13 -0.372 8
-0.165 0.044 -0.32 8
-0.033 -0.01 -0.23 9
0.126 -0.058 -0.053 8
0.23 -0.013 0.187 9
0.207 -0.012 0.169 6
0.2 -0.005 0.224 10
0.147 -0.113 0.043 9
0.031 -0.173 -0.026 8
-0.199 -0.132 -0.019 9
-0.327 -0.105 -0.02 8
-0.318 -0.115 -0.066 8
-0.286 -0.103 -0.059 9
-0.261 -0.091 -0.155 8
-0.165 -0.038 -0.175 9
-0.075 0.019 -0.174 8
-0.115 -0.004 -0.247 8
-0.211 -0.051 -0.216 7
-0.284 -0.054 -0.085 10
-0.255 -0.048 -0.077 9
-0.305 -0.04 0.001 8
-0.349 -0.027 0.059 8
-0.332 -0.031 0.163 9
-0.196 -0.056 0.236 8
0.07 -0.062 0.212 9
0.373 -0.058 0.13 8
0.336 -0.052 0.117 8
0.509 0.034 0.025 9
0.421 0.084 -0.273 8
0.122 0.061 -0.463 7
-0.248 0.136 -0.286 10
-0.56 0.136 -0.188 8
-0.719 0.001 -0.13 9
-0.647 0.0 -0.117 8
-0.815 -0.068 0.013 8
-0.864 -0.051 0.145 9
-0.501 -0.065 0.19 8
0.051 -0.063 0.159 9
0.476 0.072 0.039 8
0.705 0.228 -0.117 8
0.634 0.205 -0.105 9
0.608 0.312 -0.149 7
0.346 0.41 -0.083 10
0.041 0.448 0.013 8
-0.246 0.418 0.065 8
-0.473 0.33 0.032 9
-0.553 0.207 -0.056 8
-0.498 0.186 -0.05 9
-0.454 0.089 -0.151 8
-0.302 0.001 -0.242 8
-0.056 -0.071 -0.279 9
0.193 -0.079 -0.24 8
# end
#Thu Feb 26 20:25:50 GMT+08:00 2015.
