# Supplementary material for: Abnormal Gait Behavior Detection for Elderly Based on Enhanced Wigner-Ville Analysis and Cloud Incremental SVM Learning
Source: Hindawi journal article supplement (doi:10.1155/2016/5869238), 2016-01-01
Supplement: f1 [file 5869238.f1.zip › Supplementary Materials/Original Data/Lying on a bed then standing/original__46.txt]

# Accelerometer Values
# filename:  original__46.txt
# Saving start time: Thu Feb 26 20:25:52 GMT+08:00 2015

# sensor resolution: 0.0095825195m/s^2
#Sensorvendor: KIONIX, name: KX023 Accelerometer, type: 1,version : 1, range 39.240005

# X value, Y value, Z value, time diff in ms
0.192 -0.008 -0.021 8
0.163 0.024 -0.195 9
0.106 0.028 -0.325 6
0.0 0.012 -0.376 11
-0.092 -0.01 -0.286 8
-0.083 -0.009 -0.257 8
-0.08 -0.073 -0.096 9
0.002 -0.179 0.065 8
0.091 -0.255 0.207 8
0.142 -0.26 0.302 9
0.175 -0.203 0.326 8
0.158 -0.183 0.271 9
0.18 -0.164 0.244 8
0.165 0.007 0.149 8
0.118 0.073 0.057 7
0.034 0.1 -0.013 10
-0.056 0.097 -0.032 9
-0.059 0.057 -0.012 8
-0.053 0.051 -0.011 8
-0.01 0.007 0.027 9
0.025 -0.008 0.071 8
0.063 -0.033 0.079 9
0.086 -0.053 0.05 8
0.091 -0.041 0.011 8
0.091 0.003 0.013 9
0.082 0.003 0.012 8
0.077 0.053 0.031 7
0.059 0.084 0.042 10
-0.045 0.11 0.042 8
-0.24 0.103 -0.014 9
-0.257 -0.001 -0.085 8
-0.061 -0.282 -0.224 8
-0.055 -0.254 -0.201 9
-0.058 -0.37 -0.454 8
-0.09 -0.172 -0.442 9
0.075 -0.003 -0.361 8
0.173 0.057 -0.506 8
0.163 0.077 -0.578 9
0.147 0.069 -0.52 7
0.104 0.058 -0.476 10
0.04 0.006 -0.415 8
0.008 -0.072 -0.306 8
0.023 -0.19 -0.128 9
0.024 -0.327 0.08 8
0.108 -0.404 0.313 9
0.326 -0.478 0.238 8
0.294 -0.43 0.215 8
0.523 -0.524 -0.205 9
0.623 -0.523 -0.546 8
0.57 -0.392 -0.658 9
0.468 -0.219 -0.638 6
0.468 -0.106 -0.491 10
0.513 -0.102 -0.3 9
0.461 -0.091 -0.27 8
0.445 -0.192 -0.096 8
0.38 -0.3 0.123 9
0.322 -0.36 0.294 8
0.35 -0.369 0.234 9
0.445 -0.343 -0.065 8
0.559 -0.322 -0.547 8
0.503 -0.29 -0.492 9
0.601 -0.275 -0.95 8
0.586 -0.255 -1.116 7
0.451 -0.232 -0.916 10
0.274 -0.215 -0.564 8
0.131 -0.231 -0.324 9
0.062 -0.344 -0.195 8
0.055 -0.31 -0.175 9
0.113 -0.397 -0.17 8
0.156 -0.405 -0.338 8
0.126 -0.521 -0.638 9
0.157 -0.581 -0.9 8
0.177 -0.422 -0.974 9
0.163 -0.258 -0.892 8
0.147 -0.232 -0.803 7
0.163 -0.193 -0.719 10
0.238 -0.229 -0.738 8
0.313 -0.278 -0.834 9
0.363 -0.261 -0.894 8
0.327 -0.198 -0.934 8
0.294 -0.178 -0.84 9
0.146 -0.198 -0.951 8
0.017 -0.248 -1.069 8
-0.042 -0.343 -1.235 9
-0.048 -0.439 -1.39 8
0.019 -0.344 -1.159 9
0.017 -0.31 -1.043 6
0.103 -0.202 -0.728 10
0.139 -0.199 -0.811 9
0.043 -0.091 -1.076 8
-0.187 0.097 -1.08 9
-0.118 0.018 -0.586 8
0.414 -0.224 0.036 8
0.982 -0.236 0.345 9
0.884 -0.212 0.31 8
1.14 -0.008 0.418 9
0.997 0.168 0.524 8
0.73 0.027 0.523 8
0.405 -0.067 0.574 7
-0.015 0.291 0.853 10
-0.473 0.769 1.061 9
-0.426 0.692 0.955 8
-0.829 0.858 0.914 8
-0.863 0.588 0.718 9
-0.599 0.332 0.932 8
-0.207 0.331 1.544 8
0.369 0.25 1.752 9
0.544 0.375 1.684 8
0.49 0.337 1.516 9
-0.089 0.607 1.473 8
-0.881 0.679 1.388 7
-1.412 0.876 1.36 10
-1.334 0.996 1.334 8
-0.903 1.132 1.497 9
-0.505 1.442 1.772 8
-0.455 1.298 1.594 8
-0.129 1.506 1.611 9
0.219 1.618 1.33 8
0.595 1.742 0.979 9
0.815 1.891 0.613 8
0.868 1.918 0.417 8
0.762 1.79 0.662 9
0.686 1.611 0.596 6
0.495 1.465 1.039 11
0.368 1.33 1.291 8
0.352 1.253 1.4 8
0.508 1.177 1.599 9
0.898 1.106 1.797 8
1.261 1.173 1.816 9
1.135 1.056 1.635 8
1.246 1.244 1.344 8
1.166 1.376 0.773 9
0.856 1.439 0.231 8
0.431 1.411 -0.141 9
0.209 1.397 -0.33 6
0.227 1.588 -0.297 10
0.204 1.429 -0.267 9
0.281 1.683 -0.121 8
0.379 1.756 -0.067 8
0.554 1.757 -0.155 9
0.903 1.862 -0.221 8
1.39 1.867 -0.149 9
1.773 1.627 0.106 8
1.596 1.465 0.095 8
1.818 1.038 0.482 9
1.743 0.424 1.016 8
1.396 -0.105 1.748 7
1.067 -0.382 2.356 10
0.877 -0.545 2.671 8
0.794 -0.621 2.848 9
0.714 -0.559 2.563 8
0.778 -0.581 2.675 9
0.976 -0.595 2.635 8
1.208 -0.597 2.398 8
1.405 -0.671 1.885 9
1.377 -0.737 1.228 8
1.239 -0.607 0.549 8
1.115 -0.546 0.494 9
0.91 -0.404 -0.243 7
0.936 -0.345 -1.323 10
0.941 -0.126 -2.704 8
1.242 0.11 -4.285 8
1.902 0.05 -6.142 9
1.712 0.045 -5.527 8
2.337 -0.473 -7.161 9
2.408 -1.152 -7.582 8
1.638 -1.649 -6.421 8
0.427 -2.054 -4.4 9
-0.859 -2.271 -2.565 8
-1.86 -2.267 -1.636 9
-1.674 -2.04 -1.472 6
-2.124 -1.885 -1.744 10
-2.092 -1.439 -2.833 9
-1.353 -0.937 -3.928 8
-0.074 -0.62 -4.82 9
1.043 -0.371 -5.219 8
1.429 -0.14 -4.792 8
1.286 -0.126 -4.312 9
0.869 0.031 -3.415 8
0.201 0.003 -2.45 9
-0.397 -0.118 -1.731 8
-0.858 -0.182 -1.191 8
-1.095 -0.13 -0.732 7
-0.88 0.033 -0.254 10
-0.792 0.03 -0.228 8
-0.132 0.238 0.143 9
0.553 0.447 0.372 8
0.795 0.571 0.54 9
0.521 0.538 0.599 8
0.0 0.311 0.581 8
-0.628 0.012 0.472 9
-0.565 0.011 0.424 8
-1.252 -0.163 0.204 9
-1.888 -0.189 -0.114 8
-2.392 -0.076 -0.391 7
-2.649 0.197 -0.499 10
-2.524 0.479 -0.48 8
-2.124 0.628 -0.313 9
-1.911 0.565 -0.282 8
-1.49 0.615 0.021 8
-1.303 0.598 0.31 9
-1.49 0.528 0.416 8
-1.912 0.443 0.249 9
-2.347 0.39 -0.05 8
-2.524 0.366 -0.22 8
-2.271 0.329 -0.198 9
-2.057 0.331 -0.02 6
-1.434 0.351 0.382 11
-0.57 0.35 0.771 8
0.292 0.318 0.892 8
0.885 0.354 0.494 9
1.0 0.525 -0.31 8
0.9 0.472 -0.279 8
0.475 0.662 -1.204 9
-0.305 0.764 -1.951 8
-1.115 0.778 -2.149 9
-1.632 0.721 -1.362 8
-1.575 0.564 0.458 8
-1.417 0.508 0.412 7
-0.751 0.177 2.747 10
0.341 -0.303 4.828 9
1.558 -0.791 6.109 8
2.496 -1.183 6.247 8
2.762 -1.439 5.228 9
2.109 -1.419 3.438 8
0.825 -1.13 1.243 9
0.742 -1.017 1.119 8
-0.441 -0.568 -0.911 8
-0.838 -0.441 -2.321 9
-0.516 -0.553 -3.067 8
-0.112 -0.528 -3.129 7
0.075 -0.431 -2.591 10
-0.046 -0.344 -1.837 8
-0.041 -0.309 -1.653 9
-0.399 -0.342 -1.176 8
-0.866 -0.347 -1.022 8
-1.296 -0.278 -0.89 9
-1.507 -0.022 -0.606 8
-0.968 0.239 -0.206 9
-0.292 0.258 -0.311 8
-0.263 0.232 -0.28 8
0.434 -0.311 -1.098 9
1.419 -0.96 -1.66 7
1.819 -0.974 -1.62 10
1.814 -0.437 -0.995 8
1.203 0.1 -0.581 8
-0.214 0.272 -0.982 9
-0.192 0.245 -0.883 8
-1.803 0.413 -0.734 9
-2.841 0.58 0.209 8
-3.127 0.701 1.044 8
-2.809 0.927 2.017 9
-1.65 0.959 2.677 8
-0.176 0.614 2.39 9
-0.158 0.553 2.151 6
0.845 0.279 1.786 10
1.236 0.253 1.728 9
1.184 0.234 1.477 8
1.016 0.082 0.749 9
0.854 -0.153 -0.062 8
0.557 -0.24 -0.527 8
0.501 -0.216 -0.475 9
0.207 -0.13 -0.472 8
0.066 0.033 -0.009 8
0.087 0.232 0.625 9
0.322 0.426 1.167 8
0.29 0.383 1.05 7
0.652 0.52 1.681 10
0.587 0.468 1.513 8
1.288 0.443 1.301 9
1.515 0.377 0.974 8
1.431 0.443 0.767 9
1.149 0.676 0.914 8
1.109 0.843 1.15 8
0.998 0.759 1.035 9
1.2 1.0 0.865 8
1.442 1.242 0.409 9
1.556 1.207 -0.05 8
1.366 0.946 -0.421 7
0.928 0.623 -0.749 10
0.515 0.149 -1.066 8
0.463 0.134 -0.959 9
0.235 -0.369 -1.001 8
0.14 -0.623 -0.594 8
0.207 -0.657 -0.074 9
0.376 -0.42 0.272 8
0.636 -0.027 0.408 9
0.973 0.229 0.266 8
0.876 0.206 0.239 8
1.078 0.31 -0.021 9
1.084 0.332 -0.207 6
0.933 0.315 -0.341 10
0.728 0.279 -0.51 9
0.625 0.253 -0.686 8
0.693 0.242 -0.711 9
0.624 0.218 -0.64 8
0.938 0.169 -0.467 8
1.296 0.04 -0.168 9
1.377 -0.137 0.216 8
1.097 -0.264 0.516 9
0.674 -0.309 0.479 8
0.361 -0.374 0.125 8
0.325 -0.336 0.112 7
0.126 -0.328 -0.256 10
0.021 -0.316 -0.494 9
-0.048 -0.396 -0.683 8
-0.204 -0.438 -0.704 8
-0.385 -0.501 -0.639 9
-0.425 -0.57 -0.734 8
-0.382 -0.513 -0.661 9
-0.37 -0.542 -0.79 8
-0.438 -0.571 -0.815 8
-0.503 -0.604 -0.705 9
-0.503 -0.576 -0.351 8
-0.394 -0.523 0.036 7
-0.234 -0.479 0.252 10
-0.21 -0.431 0.227 8
-0.085 -0.372 0.319 9
-0.024 -0.31 0.309 8
-0.125 -0.224 0.283 8
-0.385 -0.159 0.299 9
-0.541 -0.135 0.356 8
-0.489 -0.193 0.396 9
-0.44 -0.174 0.356 8
-0.355 -0.165 0.457 8
-0.319 -0.138 0.576 9
-0.241 -0.215 0.48 7
-0.127 -0.129 0.26 10
-0.206 0.005 0.075 8
-0.495 0.051 -0.005 8
-0.446 0.046 -0.005 9
-0.523 0.018 0.024 8
-0.246 -0.072 0.058 9
0.037 -0.179 0.139 8
0.075 -0.285 0.393 8
-0.176 -0.345 0.647 9
-0.158 -0.367 0.742 8
-0.142 -0.33 0.668 9
-0.272 -0.31 0.642 6
-0.057 -0.254 0.541 10
0.046 -0.185 0.417 9
0.067 -0.1 0.273 8
0.027 -0.047 0.168 9
0.024 -0.042 0.151 8
-0.004 -0.029 0.07 8
-0.029 -0.04 -0.044 9
-0.119 -0.07 -0.103 8
-0.245 -0.111 -0.141 8
-0.294 -0.15 -0.143 9
-0.15 -0.195 -0.1 8
-0.135 -0.175 -0.09 7
0.091 -0.211 -0.121 10
0.203 -0.193 -0.116 8
0.172 -0.151 0.032 9
0.081 -0.113 0.229 8
0.056 -0.101 0.356 9
0.096 -0.102 0.376 8
0.086 -0.092 0.338 8
0.1 -0.088 0.269 9
0.074 -0.103 0.105 8
0.014 -0.142 -0.051 9
-0.067 -0.176 -0.125 8
-0.133 -0.203 -0.129 7
-0.173 -0.214 -0.057 10
-0.156 -0.192 -0.051 8
-0.153 -0.188 0.065 8
-0.043 -0.153 0.138 9
0.082 -0.088 0.139 8
0.139 -0.019 0.109 9
0.151 0.043 0.071 8
0.125 0.078 0.022 8
0.113 0.07 0.02 9
0.084 0.082 -0.066 8
0.074 0.087 -0.175 9
0.059 0.091 -0.264 6
0.058 0.106 -0.29 10
0.094 0.139 -0.25 9
0.145 0.172 -0.178 8
0.131 0.154 -0.16 9
0.194 0.202 -0.048 8
0.307 0.282 0.057 8
0.442 0.372 0.061 9
0.521 0.454 -0.015 8
0.543 0.515 -0.086 9
0.587 0.582 -0.16 8
0.528 0.524 -0.144 8
0.596 0.638 -0.227 7
0.622 0.743 -0.27 10
0.656 0.785 -0.264 8
0.769 0.778 -0.233 9
0.985 0.744 -0.187 8
1.188 0.719 -0.168 9
1.069 0.647 -0.151 8
1.263 0.655 -0.2 8
1.408 0.673 -0.399 9
1.388 0.683 -0.697 8
1.287 0.666 -0.894 9
1.216 0.622 -0.88 8
1.095 0.56 -0.792 7
1.063 0.511 -0.652 10
1.053 0.452 -0.559 8
1.121 0.382 -0.589 9
1.192 0.296 -0.683 8
1.11 0.234 -0.75 8
0.994 0.147 -0.77 9
0.88 -0.012 -0.883 8
0.792 -0.011 -0.794 9
0.603 -0.167 -0.916 8
0.335 -0.307 -0.839 8
0.006 -0.394 -0.735 9
-0.267 -0.452 -0.708 6
-0.542 -0.477 -0.658 11
-0.821 -0.392 -0.514 8
-0.739 -0.353 -0.463 8
-0.815 -0.206 -0.272 9
-0.697 0.018 -0.129 8
-0.477 0.272 -0.067 9
-0.231 0.474 -0.17 8
-0.057 0.54 -0.423 8
-0.172 0.503 -0.531 9
-0.155 0.453 -0.478 8
-0.621 0.404 -0.33 8
-1.323 0.238 -0.094 7
-2.27 -0.003 0.115 10
-3.307 -0.195 0.367 9
-3.952 -0.415 0.674 8
-3.521 -0.829 0.734 8
-3.169 -0.746 0.66 9
-1.877 -1.009 0.15 8
-0.559 -1.029 -0.428 9
0.07 -1.068 -0.403 8
-0.278 -1.074 0.177 8
-1.164 -1.048 1.019 9
-1.048 -0.944 0.917 8
-1.871 -0.898 0.826 7
-2.4 -0.825 2.311 10
-2.544 -0.672 2.224 8
-2.645 -0.514 1.557 9
-2.715 -0.451 0.885 8
-2.47 -0.403 0.373 8
-2.223 -0.363 0.335 9
-1.862 -0.342 -0.256 8
-1.716 -0.329 -0.676 9
-2.045 -0.186 -0.635 8
-2.404 -0.177 -0.198 8
-2.455 -0.391 0.232 9
-2.209 -0.352 0.209 7
-1.985 -0.448 0.447 10
-1.511 -0.455 0.505 8
-1.074 -0.546 0.42 8
-0.767 -0.735 0.281 9
-0.473 -0.873 0.042 8
-0.198 -0.899 -0.222 9
-0.044 -0.799 -0.215 8
-0.039 -0.719 -0.194 8
-0.11 -0.528 0.097 9
-0.105 -0.459 0.468 8
0.228 -0.556 0.804 9
0.75 -0.614 1.102 6
1.117 -0.451 1.254 10
1.055 -0.134 1.15 9
0.949 -0.12 1.035 8
0.627 0.233 0.808 9
0.204 0.671 0.527 8
-0.261 1.177 0.115 8
-0.373 1.439 -0.488 9
0.308 1.551 -1.049 8
1.589 1.675 -1.313 9
1.43 1.508 -1.181 8
2.607 1.555 -1.221 8
3.235 1.519 -1.171 7
3.317 1.377 -1.015 10
2.8 1.2 -0.524 8
1.836 1.035 0.272 9
0.99 0.727 1.172 8
0.891 0.654 1.055 9
0.456 0.204 1.875 8
0.293 -0.099 2.408 8
0.45 -0.309 2.629 9
0.922 -0.55 2.549 8
1.498 -0.78 2.279 9
1.915 -1.006 1.929 8
1.723 -0.905 1.736 7
1.854 -1.214 1.424 10
1.662 -1.498 1.224 8
1.171 -1.621 1.196 9
0.468 -1.712 1.243 8
-0.235 -1.665 1.117 8
-0.689 -1.459 0.643 9
-0.62 -1.313 0.579 8
-0.442 -1.197 -0.099 9
0.422 -1.109 -0.423 8
1.234 -0.904 -0.33 8
1.369 -0.56 -0.255 9
1.232 -0.173 -0.343 6
0.151 0.161 -0.542 11
0.136 0.145 -0.488 8
-0.4 0.365 -0.733 8
-0.338 0.372 -0.992 9
0.074 0.228 -1.266 8
0.357 0.056 -1.727 8
0.588 -0.122 -2.16 9
0.384 -0.392 -2.165 8
0.345 -0.353 -1.949 9
-0.274 -0.34 -1.415 8
-0.773 -0.358 -0.749 8
-1.09 -0.537 -0.289 7
-1.201 -0.483 0.035 10
-1.102 -0.278 0.18 9
-0.786 0.066 0.234 8
-0.707 0.059 0.211 8
-0.265 0.366 0.221 9
0.177 0.581 0.386 8
0.401 0.649 0.716 9
0.136 0.638 0.942 8
-0.607 0.606 1.049 8
-0.546 0.546 0.944 9
-1.19 0.501 1.101 8
-1.334 0.561 1.341 7
-0.823 0.79 1.611 10
0.142 0.992 2.045 8
1.09 1.155 2.717 9
1.794 0.995 3.297 8
1.615 0.895 2.967 8
1.889 0.556 3.225 9
1.649 0.377 3.0 8
1.221 0.303 2.303 9
1.006 0.305 1.439 8
0.913 0.153 0.676 8
0.8 -0.117 0.187 9
0.72 -0.105 0.168 7
0.628 -0.347 0.163 10
0.547 -0.441 0.513 8
0.436 -0.316 0.702 8
0.394 -0.086 0.581 9
0.46 0.096 0.304 8
0.289 0.361 0.032 9
0.26 0.325 0.029 8
0.146 0.536 -0.123 8
0.154 0.451 -0.269 9
-0.134 0.45 -0.23 8
-0.417 0.587 0.045 9
-0.393 0.633 0.264 6
-0.289 0.705 0.363 10
-0.26 0.635 0.327 9
-0.339 0.776 0.338 8
-0.657 0.847 0.225 9
-1.223 0.829 0.017 8
-1.882 0.836 -0.051 8
-2.29 0.812 0.177 9
-2.113 0.524 0.746 8
-1.902 0.471 0.671 8
-1.418 0.188 1.549 9
-0.907 0.203 2.338 8
-0.25 0.261 2.839 7
0.362 0.194 2.992 10
0.532 -0.037 2.673 8
-0.166 -0.52 1.757 9
-0.149 -0.468 1.581 8
-1.135 -0.712 0.604 9
-1.667 -0.722 -0.045 8
-2.18 -0.901 -0.797 8
-2.767 -0.949 -1.401 9
-2.972 -0.995 -1.554 8
-2.486 -1.214 -1.327 9
-2.237 -1.092 -1.195 8
-1.051 -1.387 -1.187 7
-0.045 -0.925 -0.94 10
0.247 -0.148 -0.52 8
0.319 -0.454 -0.876 9
0.247 -1.34 -1.432 8
-0.03 -2.173 -1.784 8
-0.027 -1.956 -1.606 9
-0.717 -2.203 -1.819 8
-1.554 -1.676 -1.731 8
-1.477 -1.257 -1.139 9
-0.725 -0.761 -0.288 8
-0.164 0.145 0.252 9
-0.147 0.131 0.227 6
0.564 0.587 0.146 10
1.386 0.176 -0.241 9
1.876 -0.614 -0.487 8
1.907 -1.347 -0.513 9
1.513 -1.986 0.031 8
0.783 -2.214 0.924 8
0.156 -2.239 0.876 9
0.14 -2.015 0.788 8
-0.469 -2.173 -0.266 9
-1.332 -1.937 -1.152 8
-2.091 -1.196 -1.433 8
-2.547 -0.276 -1.392 7
-2.642 0.455 -1.349 10
-2.378 0.683 -1.437 9
-2.14 0.615 -1.293 8
-1.56 0.314 -1.539 8
-0.77 -0.159 -1.766 9
-0.139 -0.445 -1.813 8
0.298 -0.519 -1.844 9
0.535 -0.507 -1.874 8
0.481 -0.456 -1.686 8
0.461 -0.489 -1.633 9
0.217 -0.566 -1.462 8
-0.169 -0.628 -1.17 7
-0.59 -0.645 -0.764 10
-0.942 -0.616 -0.294 8
-1.099 -0.569 0.057 9
-0.989 -0.512 0.051 8
-0.881 -0.482 0.154 8
-0.583 -0.49 0.018 9
-0.185 -0.496 -0.255 8
0.197 -0.456 -0.52 9
0.476 -0.385 -0.755 8
0.673 -0.335 -0.947 8
0.605 -0.302 -0.853 9
0.744 -0.213 -0.851 7
0.725 0.004 -0.672 10
0.522 0.16 -0.48 8
0.268 0.104 -0.287 8
0.088 -0.025 -0.001 9
0.032 -0.104 0.33 8
0.029 -0.094 0.297 9
0.055 -0.111 0.434 8
0.115 -0.064 0.358 8
0.184 0.056 0.236 9
0.211 0.212 0.162 8
0.15 0.345 0.126 9
0.135 0.31 0.113 6
-0.015 0.382 0.13 10
-0.227 0.382 0.262 9
-0.455 0.34 0.432 8
-0.591 0.288 0.509 8
-0.555 0.292 0.452 9
-0.483 0.364 0.257 8
-0.338 0.306 0.117 9
-0.305 0.275 0.106 8
-0.175 0.197 0.118 8
-0.338 0.368 0.217 9
-0.757 0.747 0.372 8
-1.163 1.138 0.611 7
-1.369 1.366 0.862 10
-1.306 1.275 0.926 8
-1.175 1.147 0.834 9
-0.78 0.749 0.61 8
-0.364 0.484 0.286 9
-0.226 0.442 0.121 8
-0.23 0.416 0.134 8
-0.25 0.395 0.334 9
-0.299 0.4 0.543 8
-0.269 0.36 0.489 9
-0.315 0.383 0.599 8
-0.292 0.418 0.652 7
-0.215 0.467 0.581 10
-0.062 0.52 0.387 8
0.092 0.608 0.122 8
0.236 0.707 -0.128 9
0.212 0.636 -0.115 8
0.349 0.676 -0.257 9
0.351 0.613 -0.303 8
0.238 0.452 -0.288 8
0.153 0.238 -0.228 9
0.14 0.036 -0.057 8
0.251 -0.139 0.193 9
0.225 -0.125 0.173 6
0.443 -0.272 0.409 10
0.634 -0.316 0.584 9
0.674 -0.186 0.672 8
0.511 0.015 0.697 9
0.219 0.168 0.609 8
-0.042 0.312 0.367 8
-0.038 0.281 0.33 9
-0.242 0.38 -0.026 8
-0.479 0.315 -0.35 9
-0.681 0.181 -0.581 8
-0.787 0.098 -0.844 8
-0.708 0.088 -0.759 7
-0.714 0.009 -1.249 10
-0.642 0.008 -1.124 9
-0.42 -0.007 -1.072 8
-0.121 -0.016 -0.973 8
0.128 -0.023 -0.892 9
0.333 -0.016 -0.744 8
0.406 0.05 -0.585 8
0.319 0.251 -0.512 9
0.287 0.226 -0.46 8
0.176 0.511 -0.421 9
0.086 0.746 -0.367 8
-0.008 0.882 -0.352 7
0.053 0.705 -0.406 10
0.172 0.499 -0.41 8
0.154 0.449 -0.242 9
0.056 0.404 -0.218 8
-0.184 1.004 0.11 8
-0.139 0.926 0.499 9
0.119 0.597 0.787 8
0.341 0.351 1.15 9
0.578 0.104 1.647 8
0.521 0.093 1.482 8
0.656 -0.091 1.839 9
0.696 -0.276 1.97 6
0.676 -0.471 1.938 11
0.531 -0.554 1.804 8
0.266 -0.489 1.625 8
0.037 -0.341 1.348 9
0.033 -0.307 1.213 8
-0.119 -0.13 0.787 8
-0.218 0.028 0.345 9
-0.27 0.15 0.002 8
-0.289 0.227 -0.229 9
-0.289 0.223 -0.303 8
-0.302 0.164 -0.246 8
-0.272 0.148 -0.222 7
-0.301 0.09 -0.129 10
-0.333 0.049 -0.056 9
-0.383 0.047 -0.03 8
-0.401 0.068 -0.057 8
-0.316 0.09 -0.146 9
-0.169 0.121 -0.36 8
-0.152 0.109 -0.324 9
0.024 0.104 -0.607 8
0.19 0.082 -0.805 8
0.292 -0.012 -0.967 9
0.233 -0.159 -0.953 8
0.052 -0.186 -0.786 7
-0.136 -0.152 -0.703 10
-0.123 -0.137 -0.632 8
-0.346 -0.049 -0.663 9
-0.442 0.105 -0.795 8
-0.294 0.237 -0.993 8
0.077 0.349 -1.156 9
0.487 0.411 -1.177 8
0.677 0.438 -1.089 9
0.609 0.395 -0.98 8
0.523 0.4 -0.719 8
0.238 0.345 -0.27 9
-0.028 0.201 0.194 7
-0.155 -0.001 0.569 10
-0.147 -0.148 0.752 8
0.084 -0.234 0.623 8
0.075 -0.211 0.561 9
0.485 -0.306 0.281 8
0.85 -0.388 0.045 9
0.985 -0.411 -0.174 8
0.841 -0.346 -0.257 8
0.55 -0.194 -0.157 9
0.195 -0.042 -0.101 8
0.176 -0.038 -0.091 9
-0.182 0.059 -0.089 6
-0.515 0.16 -0.013 10
-0.658 0.183 0.209 9
-0.626 0.144 0.429 8
-0.592 0.196 0.568 9
-0.374 0.129 0.737 8
-0.337 0.116 0.664 8
0.126 -0.088 0.719 9
0.566 -0.184 0.574 8
0.74 -0.203 0.424 9
0.65 -0.192 0.459 8
0.385 -0.233 0.56 8
0.347 -0.21 0.504 7
0.002 -0.368 0.563 10
-0.273 -0.549 0.652 8
-0.526 -0.591 0.614 9
-0.725 -0.403 0.462 8
-0.624 -0.285 0.404 9
-0.33 -0.33 0.332 8
-0.297 -0.323 0.175 8
-0.267 -0.29 0.157 9
-0.031 -0.248 0.062 8
-0.17 -0.218 0.053 9
-0.389 -0.192 0.15 8
-0.62 -0.189 0.346 7
-0.679 -0.216 0.492 10
-0.611 -0.195 0.442 8
-0.535 -0.221 0.502 9
-0.312 -0.211 0.484 8
0.086 -0.187 0.305 8
0.48 -0.168 0.093 9
0.707 -0.126 -0.001 8
0.749 -0.102 -0.081 9
0.674 -0.092 -0.073 8
0.523 -0.133 -0.155 8
0.205 -0.209 -0.158 9
-0.193 -0.262 -0.049 6
-0.543 -0.276 0.122 10
-0.615 -0.254 0.231 9
-0.402 -0.216 0.194 8
-0.362 -0.195 0.175 9
-0.038 -0.124 0.079 8
0.291 -0.024 -0.03 8
0.545 0.082 -0.231 9
0.568 0.128 -0.413 8
0.293 0.176 -0.417 9
-0.085 0.342 -0.491 8
-0.076 0.308 -0.442 8
-0.442 0.494 -0.661 7
-0.665 0.603 -0.78 10
-0.68 0.592 -0.731 9
-0.511 0.346 -0.283 8
-0.416 0.183 0.405 8
-0.292 0.217 0.828 9
-0.263 0.196 0.745 8
0.207 0.228 0.783 9
0.886 0.295 0.529 8
1.464 0.361 0.193 8
1.631 0.475 -0.091 9
1.332 0.608 -0.255 8
1.199 0.547 -0.229 7
0.611 0.658 -0.37 10
0.008 0.713 -0.487 8
-0.448 0.681 -0.604 9
-0.747 0.573 -0.817 8
-0.929 0.442 -0.997 8
-1.055 0.325 -1.02 9
-1.143 0.253 -0.859 8
-1.029 0.227 -0.773 9
# end
#Thu Feb 26 20:25:59 GMT+08:00 20150
