# Supplementary material for: Abnormal Gait Behavior Detection for Elderly Based on Enhanced Wigner-Ville Analysis and Cloud Incremental SVM Learning
Source: Hindawi journal article supplement (doi:10.1155/2016/5869238), 2016-01-01
Supplement: f1 [file 5869238.f1.zip › Supplementary Materials/Original Data/Lying on a bed then standing/original__47.txt]

# Accelerometer Values
# filename:  original__47.txt
# Saving start time: Thu Feb 26 20:26:00 GMT+08:00 2015

# sensor resolution: 0.0095825195m/s^2
#Sensorvendor: KIONIX, name: KX023 Accelerometer, type: 1,version : 1, range 39.240005

# X value, Y value, Z value, time diff in ms
0.391 -0.324 -0.196 9
0.346 -0.191 -0.505 8
0.311 -0.172 -0.454 8
0.137 0.008 -0.657 9
-0.079 0.169 -0.62 8
-0.01 0.181 -0.367 9
0.223 -0.019 -0.08 8
0.156 -0.053 0.13 8
-0.018 0.139 0.463 9
-0.016 0.125 0.417 6
0.071 0.045 0.781 10
0.292 -0.105 0.833 9
0.465 -0.07 0.492 8
0.564 -0.084 -0.028 9
0.566 -0.093 -0.372 8
0.446 0.064 -0.445 8
0.401 0.057 -0.4 9
0.263 0.276 -0.232 8
0.183 0.402 -0.067 9
0.193 0.379 -0.123 8
0.33 0.322 -0.069 8
0.456 0.334 0.154 7
0.504 0.362 0.308 10
0.453 0.325 0.277 9
0.478 0.328 0.355 8
0.509 0.284 0.307 8
0.534 0.195 0.06 9
0.486 0.096 -0.285 8
0.358 0.039 -0.535 9
0.213 0.072 -0.698 8
0.192 0.065 -0.628 8
0.117 0.152 -0.717 9
0.108 0.215 -0.664 8
0.028 0.205 -0.619 7
-0.01 0.191 -0.576 10
0.054 0.223 -0.409 8
0.139 0.199 -0.3 9
0.125 0.179 -0.27 8
0.264 0.102 -0.289 9
0.383 0.069 -0.447 8
0.454 0.093 -0.695 8
0.514 0.189 -0.746 9
0.468 0.282 -0.592 8
0.421 0.254 -0.533 8
0.246 0.26 -0.479 9
0.041 0.209 -0.207 7
-0.151 0.157 -0.241 10
-0.309 0.19 -0.408 8
-0.32 0.332 -0.598 8
-0.167 0.535 -0.838 9
-0.151 0.481 -0.754 8
-0.035 0.724 -1.012 9
-0.036 0.967 -1.03 8
0.013 0.958 -0.788 8
0.128 0.76 -0.513 9
0.194 0.664 -0.314 8
0.267 0.604 -0.236 9
0.24 0.544 -0.213 6
0.338 0.483 -0.267 10
0.405 0.441 -0.331 9
0.341 0.408 -0.341 8
0.154 0.353 -0.303 9
-0.062 0.288 -0.288 8
-0.217 0.21 -0.369 8
-0.196 0.189 -0.332 9
-0.228 0.127 -0.513 8
-0.132 0.077 -0.76 9
0.051 0.042 -0.952 8
0.383 -0.059 -0.97 8
0.748 -0.211 -0.822 7
0.811 -0.294 -0.597 10
0.73 -0.265 -0.537 8
0.535 -0.342 -0.298 9
0.23 -0.453 -0.028 8
-0.106 -0.563 0.238 9
-0.374 -0.642 0.37 8
-0.495 -0.738 0.272 8
-0.467 -0.829 0.047 9
-0.42 -0.746 0.042 8
-0.332 -0.725 -0.154 9
-0.069 -0.79 -0.457 8
0.24 -0.976 -0.793 7
0.269 -1.032 -0.859 10
0.078 -1.031 -0.769 8
-0.147 -1.058 -0.645 9
-0.132 -0.952 -0.581 8
-0.286 -1.017 -0.324 8
-0.337 -1.09 -0.033 9
-0.278 -1.149 0.08 8
-0.179 -1.129 -0.021 9
-0.037 -1.099 -0.152 8
-0.034 -1.178 -0.282 8
0.127 -1.061 -0.254 9
0.186 -1.118 -0.399 6
0.136 -1.035 -0.44 10
0.039 -0.965 -0.48 9
-0.11 -0.934 -0.586 8
-0.251 -0.881 -0.702 9
-0.226 -0.793 -0.632 8
-0.265 -0.744 -0.676 8
-0.225 -0.677 -0.533 9
-0.119 -0.613 -0.237 8
0.01 -0.577 0.018 9
0.078 -0.589 0.128 8
0.003 -0.597 0.111 8
0.003 -0.537 0.1 7
-0.111 -0.516 0.03 10
-0.119 -0.572 -0.166 9
-0.064 -0.647 -0.411 8
-0.063 -0.662 -0.504 8
-0.169 -0.571 -0.44 9
-0.228 -0.415 -0.198 8
-0.205 -0.373 -0.178 9
-0.192 -0.292 0.108 8
-0.146 -0.259 0.219 8
0.0 -0.204 0.089 9
0.238 -0.1 -0.118 8
0.521 0.016 -0.245 7
0.678 0.173 -0.292 10
0.61 0.155 -0.263 8
0.645 0.313 -0.136 9
0.536 0.491 0.216 8
0.324 0.709 0.696 8
0.202 0.851 1.146 9
0.194 0.931 1.501 8
0.402 1.01 1.765 9
0.362 0.909 1.588 8
0.694 1.038 1.774 8
0.977 1.138 1.836 9
1.17 1.237 1.749 7
1.19 1.371 1.572 10
0.963 1.485 1.388 8
0.592 1.622 1.28 8
0.533 1.46 1.152 9
0.147 1.594 1.132 8
-0.111 1.657 1.243 9
-0.115 1.651 1.454 8
0.089 1.654 1.629 8
0.526 1.663 1.65 9
0.989 1.666 1.534 8
0.89 1.499 1.38 9
1.096 1.5 1.244 6
1.024 1.463 1.135 10
0.616 1.405 1.007 9
-0.033 1.323 0.714 8
-0.591 1.252 0.354 8
-0.782 1.185 0.139 9
-0.704 1.066 0.125 8
-0.356 1.034 0.143 9
0.419 1.1 0.152 8
1.224 1.211 -0.013 8
1.638 1.335 -0.163 9
1.44 1.407 -0.216 8
1.296 1.267 -0.194 7
0.764 1.246 -0.196 10
0.201 1.189 -0.167 8
-0.215 1.105 -0.096 9
-0.368 1.043 -0.085 8
-0.286 1.035 -0.144 9
-0.082 1.111 -0.182 8
0.073 1.252 -0.224 8
0.066 1.127 -0.202 9
0.168 1.212 -0.202 8
0.167 1.294 -0.157 9
0.195 1.459 -0.149 8
0.531 1.63 -0.131 7
0.97 1.688 -0.071 10
1.156 1.514 0.116 8
1.041 1.362 0.104 9
0.832 0.89 0.571 8
0.368 0.215 1.308 8
-0.028 -0.513 2.16 9
-0.087 -1.155 3.057 8
0.268 -1.483 3.986 8
0.241 -1.471 4.596 9
0.793 -1.324 4.136 8
1.159 -1.086 4.234 9
1.332 -0.768 3.73 6
1.429 -0.527 2.656 10
1.374 -0.495 1.49 9
1.194 -0.788 0.637 8
1.074 -0.709 0.574 9
0.826 -1.293 0.516 8
0.552 -1.916 -0.172 8
0.223 -2.329 -0.163 9
-0.163 -2.385 -0.277 8
-0.385 -2.271 -0.685 9
-0.485 -2.083 -1.355 8
-0.437 -1.874 -1.219 8
-0.368 -1.53 -2.043 7
0.407 -1.136 -2.826 10
1.817 -0.819 -3.435 9
2.849 -0.595 -3.862 8
2.913 -0.519 -3.991 8
2.173 -0.571 -3.641 9
1.956 -0.514 -3.277 8
0.752 -0.586 -2.815 9
-0.595 -0.598 -2.763 8
-1.815 -0.446 -3.152 8
-2.534 -0.433 -3.702 9
-2.889 -0.696 -4.184 8
-2.6 -0.627 -3.766 7
-2.756 -0.801 -3.913 10
-2.368 -0.897 -3.404 8
-1.599 -0.909 -2.108 9
-0.794 -0.809 -0.342 8
-0.045 -0.696 1.331 8
0.481 -0.515 2.454 9
0.69 -0.322 2.744 8
0.621 -0.289 2.47 9
0.545 -0.142 1.972 8
0.09 -0.046 0.964 8
-0.611 0.035 -0.082 9
-1.246 0.175 -0.841 6
-1.451 0.434 -1.261 11
-1.102 0.743 -1.25 8
-0.992 0.669 -1.125 8
-0.467 0.949 -0.67 9
0.027 1.032 -0.165 8
0.386 0.882 0.143 9
0.386 0.638 0.298 8
0.006 0.379 0.349 8
-0.576 0.199 0.286 9
-0.519 0.179 0.257 8
-1.134 0.056 -0.061 8
-1.719 0.0 -0.665 7
-2.254 0.088 -1.219 10
-2.11 0.228 -1.629 9
-1.261 0.342 -2.067 8
-0.677 0.572 -2.224 8
-0.609 0.515 -2.002 9
-0.602 0.74 -1.741 8
-0.845 0.719 -1.293 9
-1.111 0.519 -0.872 8
-1.366 0.31 -0.468 8
-1.539 0.149 -0.03 9
-1.631 0.069 0.315 8
-1.468 0.062 0.283 7
-1.407 0.063 0.552 10
-0.99 0.102 0.617 8
-0.395 0.238 0.254 9
0.03 0.492 -0.203 8
0.266 0.703 -0.424 9
0.398 0.763 -0.477 8
0.358 0.687 -0.429 8
0.375 0.648 -0.386 9
0.24 0.522 -0.204 8
-0.022 0.343 0.026 9
-0.375 0.188 0.085 8
-0.338 0.169 0.077 7
-0.894 0.028 -0.123 10
-0.805 0.025 -0.11 8
-0.662 0.13 -0.063 9
-0.328 0.296 0.282 8
-0.05 0.409 0.844 8
0.164 0.436 1.468 9
0.314 0.395 2.17 8
0.282 0.356 1.953 8
0.246 0.21 2.625 9
0.084 -0.034 3.129 8
0.001 -0.293 3.27 9
0.031 -0.576 2.949 6
0.032 -0.862 2.369 10
-0.041 -1.08 1.631 9
-0.037 -0.972 1.468 8
-0.064 -1.096 0.654 9
-0.013 -1.131 -0.02 8
0.076 -1.117 -0.459 8
0.205 -1.093 -0.778 9
0.268 -1.083 -0.976 8
0.167 -1.071 -0.96 9
0.151 -0.964 -0.864 8
-0.071 -0.956 -0.656 8
-0.382 -0.899 -0.409 7
-0.652 -0.754 -0.253 10
-0.738 -0.544 -0.175 8
-0.668 -0.3 -0.144 9
-0.483 -0.036 -0.18 8
-0.434 -0.032 -0.162 9
-0.23 0.175 -0.262 8
-0.119 0.319 -0.313 8
-0.075 0.394 -0.291 9
-0.061 0.35 -0.323 8
-0.184 0.267 -0.454 9
-0.428 0.273 -0.635 8
-0.385 0.245 -0.571 7
-0.661 0.302 -0.841 10
-0.751 0.281 -1.072 8
-0.428 0.282 -1.033 9
0.076 0.346 -0.879 8
0.456 0.309 -0.71 8
0.614 0.145 -0.442 9
0.552 0.131 -0.398 8
0.532 -0.031 -0.041 9
0.43 -0.191 0.292 8
0.288 -0.312 0.502 8
0.158 -0.319 0.655 9
0.178 -0.272 0.662 6
0.44 -0.087 0.448 10
0.396 -0.078 0.403 9
0.792 0.231 0.093 8
1.145 0.492 -0.191 9
1.37 0.716 -0.438 8
1.444 0.862 -0.628 8
1.359 0.898 -0.636 9
1.149 0.89 -0.623 8
1.034 0.801 -0.561 9
0.857 0.742 -0.729 8
0.848 0.64 -0.924 8
0.991 0.576 -0.982 7
1.159 0.512 -0.912 10
1.319 0.469 -0.594 9
1.435 0.446 -0.153 8
1.291 0.401 -0.137 8
1.373 0.3 0.139 9
1.492 0.101 0.353 8
1.557 -0.1 0.533 9
1.472 -0.254 0.486 8
1.089 -0.459 0.199 8
0.505 -0.61 -0.203 9
0.454 -0.549 -0.183 8
0.095 -0.507 -0.584 7
0.046 -0.379 -0.816 10
0.149 -0.233 -0.877 8
0.264 -0.114 -0.857 9
0.306 -0.099 -0.802 8
0.275 -0.089 -0.722 9
0.185 -0.135 -0.65 8
0.126 -0.16 -0.218 8
0.29 -0.103 0.107 9
0.527 -0.011 0.259 8
0.619 0.04 0.25 8
0.639 0.039 0.262 9
0.575 0.035 0.236 7
0.631 -0.013 0.327 10
0.603 -0.047 0.336 8
0.388 -0.03 0.314 8
0.06 -0.027 0.496 9
-0.168 -0.068 0.828 8
-0.111 -0.09 1.138 9
-0.1 -0.081 1.024 8
0.19 -0.058 1.243 8
0.449 -0.016 1.254 9
0.543 0.044 1.081 8
0.545 0.139 0.864 9
0.511 0.246 0.7 6
0.461 0.379 0.557 10
0.415 0.341 0.501 9
0.39 0.405 0.167 8
0.469 0.404 -0.192 9
0.482 0.278 -0.25 8
0.426 0.01 -0.031 8
0.388 -0.283 0.286 9
0.273 -0.529 0.555 8
0.245 -0.476 0.5 8
0.078 -0.591 0.617 9
-0.081 -0.602 0.517 8
-0.114 -0.484 0.365 7
-0.021 -0.246 0.222 10
0.19 -0.007 0.03 8
0.478 0.133 -0.098 9
0.431 0.12 -0.089 8
0.65 0.181 -0.035 9
0.721 0.18 0.096 8
0.632 0.153 0.239 8
0.368 0.082 0.304 9
0.075 0.048 0.237 8
-0.088 0.083 0.106 9
-0.079 0.075 0.095 8
-0.115 0.095 -0.054 7
0.021 0.105 -0.148 10
0.26 0.104 -0.137 8
0.314 0.088 -0.044 9
0.13 0.051 0.044 8
-0.031 0.018 0.073 8
-0.028 0.016 0.066 9
-0.061 0.004 0.069 8
-0.094 -0.003 0.066 9
-0.146 -0.018 0.032 8
-0.143 0.001 -0.006 8
-0.044 0.045 -0.015 9
-0.04 0.041 -0.014 6
0.134 0.066 -0.063 10
0.312 0.085 -0.113 9
0.431 0.104 -0.068 8
0.42 0.111 0.009 9
0.315 0.098 0.057 8
0.24 0.075 0.061 8
0.216 0.094 -0.001 9
0.255 0.085 0.0 8
0.358 0.156 -0.188 9
0.463 0.237 -0.434 8
0.542 0.321 -0.611 8
0.553 0.379 -0.767 7
0.577 0.411 -0.97 10
0.519 0.37 -0.873 9
0.527 0.417 -1.128 8
0.569 0.477 -1.321 8
0.741 0.519 -1.43 9
0.898 0.526 -1.402 8
0.97 0.493 -1.178 9
1.035 0.384 -0.738 8
0.931 0.346 -0.664 8
1.019 0.226 -0.035 9
1.038 0.165 0.553 8
0.974 0.138 0.888 7
0.779 0.158 0.981 10
0.422 0.204 0.908 8
-0.059 0.228 0.698 9
-0.053 0.205 0.628 8
-0.559 0.151 0.39 8
-0.997 -0.004 0.195 9
-1.296 -0.231 0.013 8
-1.584 -0.463 -0.11 9
-2.025 -0.702 -0.052 8
-2.585 -0.927 0.173 8
-2.326 -0.834 0.156 9
-2.725 -1.062 0.426 7
-2.567 -1.263 0.777 10
-1.813 -1.4 1.024 8
-0.874 -1.462 1.005 8
-0.397 -1.513 0.995 9
-0.605 -1.594 1.168 8
-0.544 -1.435 1.051 9
-1.287 -1.387 1.224 8
-2.208 -1.172 1.033 8
-2.951 -0.866 0.343 9
-3.41 -0.532 -0.704 8
-3.595 -0.291 -1.745 8
-3.236 -0.262 -1.57 7
-3.364 -0.161 -2.27 10
-3.582 -0.099 -2.399 9
-3.472 -0.091 -1.963 8
-2.676 -0.078 -1.314 8
-1.668 0.001 -0.645 9
-1.0 0.134 0.069 8
-0.754 0.265 0.6 9
-0.678 0.238 0.54 8
-0.666 0.276 0.743 8
-0.647 0.19 0.653 9
-0.577 0.013 0.289 8
-0.493 -0.217 -0.179 7
-0.292 -0.469 -0.467 10
-0.026 -0.64 -0.433 8
-0.023 -0.576 -0.39 9
0.157 -0.707 -0.04 8
0.209 -0.821 0.466 9
0.044 -0.86 0.995 8
-0.247 -0.821 1.398 8
-0.494 -0.6 1.474 9
-0.698 -0.207 1.171 8
-0.628 -0.186 1.054 9
-0.587 0.093 0.608 8
-0.399 0.263 0.106 7
-0.213 0.466 -0.474 10
0.036 0.685 -0.935 8
0.156 0.83 -0.896 9
0.14 0.747 -0.807 8
0.184 0.585 -0.726 8
0.062 0.307 0.162 9
-0.26 0.153 0.682 8
-0.462 0.0 1.056 9
-0.464 -0.157 1.209 8
-0.241 -0.241 1.329 8
-0.217 -0.217 1.196 9
0.267 -0.149 1.485 6
0.592 0.05 1.663 10
0.469 0.214 1.398 9
0.117 0.31 0.89 8
-0.247 0.391 0.44 9
-0.539 0.487 0.258 8
-0.485 0.439 0.232 8
-0.649 0.618 0.264 9
-0.558 0.766 0.277 8
-0.194 0.822 0.328 9
0.399 0.8 0.492 8
1.101 0.995 0.78 8
0.991 0.895 0.702 7
1.438 1.209 0.888 10
1.462 1.276 0.66 9
1.263 1.237 0.313 8
1.005 1.157 0.112 8
0.757 1.056 -0.106 9
0.608 0.907 -0.258 8
0.643 0.775 -0.225 8
0.579 0.698 -0.202 9
0.76 0.588 -0.098 8
0.909 0.459 0.031 9
1.012 0.278 0.294 8
1.148 0.02 0.682 7
1.226 -0.239 0.977 10
1.093 -0.538 1.133 8
0.983 -0.484 1.019 9
0.676 -0.799 1.011 8
0.297 -1.062 0.789 8
-0.058 -1.252 0.393 9
-0.255 -1.392 -0.021 8
-0.345 -1.503 -0.208 9
-0.406 -1.589 -0.272 8
-0.365 -1.43 -0.244 8
-0.196 -1.538 -0.31 9
0.269 -1.62 -0.416 6
0.753 -1.659 -0.63 11
0.991 -1.614 -0.844 8
0.96 -1.477 -0.997 8
0.81 -1.273 -1.05 9
0.729 -1.146 -0.945 8
0.659 -0.859 -0.845 9
0.765 -0.463 -0.745 8
1.021 -0.116 -0.749 8
1.267 0.093 -0.736 9
1.203 0.274 -0.723 8
0.803 0.411 -0.827 8
0.723 0.37 -0.744 7
0.219 0.395 -0.935 10
-0.174 0.409 -0.996 9
-0.278 0.443 -0.892 8
-0.113 0.435 -0.705 8
0.211 0.431 -0.476 9
0.642 0.432 -0.282 8
0.577 0.389 -0.254 9
1.01 0.372 -0.166 8
1.291 0.311 -0.215 8
1.432 0.285 -0.486 9
1.535 0.302 -1.027 8
1.381 0.271 -0.924 7
1.002 0.279 -1.758 10
0.902 0.251 -1.582 8
0.32 0.217 -1.392 9
-0.027 0.125 -0.933 8
-0.142 0.048 -0.37 9
-0.201 -0.009 0.061 8
-0.166 -0.06 0.35 8
-0.15 -0.054 0.315 9
0.04 -0.015 0.52 8
0.221 0.084 0.651 8
0.144 0.187 0.702 9
-0.279 0.312 0.825 7
-0.809 0.43 1.1 10
-1.164 0.622 1.608 8
-1.048 0.559 1.447 8
-1.115 0.748 2.112 9
-0.801 0.794 2.629 8
-0.203 0.735 3.04 9
0.605 0.546 3.298 8
1.402 0.292 3.325 8
1.769 0.34 3.21 9
1.592 0.306 2.889 8
1.597 0.491 2.628 9
1.385 0.488 2.107 6
1.035 0.498 1.133 10
0.637 0.594 0.425 9
0.15 0.791 1.039 8
-0.247 0.865 1.804 9
-0.222 0.779 1.624 8
-0.465 0.779 1.487 8
-0.611 0.793 1.384 9
-0.469 0.619 1.662 8
-0.133 0.157 1.603 9
0.373 -0.199 1.158 8
0.967 -0.271 1.006 8
0.871 -0.244 0.906 7
1.194 -0.413 0.846 10
1.077 -0.578 0.555 8
0.435 -0.575 0.328 9
-0.474 -0.443 0.214 8
-1.35 -0.197 0.178 9
-1.907 -0.102 0.132 8
-1.716 -0.092 0.119 8
-1.822 -0.257 0.007 9
-1.944 -0.223 -0.034 8
-2.315 0.093 0.119 9
-2.666 0.475 0.367 8
-2.775 0.804 0.482 7
-2.389 0.755 0.439 10
-2.15 0.679 0.395 8
-1.519 0.335 0.294 9
-1.115 -0.079 0.283 8
-1.027 -0.436 0.508 8
-1.133 -0.656 0.768 9
-1.272 -0.822 0.91 8
-1.257 -0.987 0.844 9
-1.131 -0.889 0.76 8
-0.911 -1.006 0.34 8
-0.593 -1.138 -0.234 9
-0.32 -1.406 -0.628 6
-0.216 -1.743 -0.668 11
-0.234 -2.017 -0.338 8
-0.316 -2.107 0.172 8
-0.285 -1.896 0.155 9
-0.412 -1.888 0.543 8
-0.522 -1.777 0.594 8
-0.62 -1.602 0.299 9
-0.705 -1.419 -0.168 8
-0.736 -1.222 -0.736 9
-0.715 -1.062 -1.39 8
-0.643 -0.956 -1.251 8
-0.607 -0.876 -1.944 7
-0.579 -0.824 -2.54 10
-0.542 -0.786 -2.836 9
-0.276 -0.991 -2.851 8
-0.144 -1.228 -2.628 8
-0.55 -1.036 -2.054 9
-0.495 -0.932 -1.848 8
-0.994 -0.591 -1.181 9
-1.233 -0.382 -0.721 8
-1.075 -0.31 -0.551 8
-0.735 -0.279 -0.762 9
-0.505 -0.209 -1.041 8
-0.455 -0.188 -0.937 7
-0.271 -0.138 -1.152 10
-0.09 -0.158 -1.467 8
-0.155 -0.215 -1.689 9
-0.413 -0.201 -1.713 8
-0.34 -0.36 -1.632 8
-0.174 -0.628 -1.473 9
-0.157 -0.565 -1.326 8
-0.231 -0.725 -1.142 9
-0.243 -1.063 -0.806 8
-0.253 -1.149 -0.137 8
-0.204 -0.821 0.386 9
0.041 -0.569 0.244 7
0.243 -0.391 -0.286 10
0.219 -0.352 -0.257 8
0.323 -0.207 -0.828 8
0.373 -0.16 -1.269 9
0.34 -0.212 -1.44 8
0.104 -0.357 -1.349 9
-0.277 -0.623 -1.078 8
-0.424 -0.845 -0.784 8
-0.381 -0.76 -0.706 9
-0.42 -0.917 -0.615 8
-0.544 -1.0 -0.646 9
-0.628 -0.811 -0.751 6
-0.65 -0.545 -0.74 10
-0.461 -0.466 -0.438 9
-0.044 -0.463 -0.195 8
-0.039 -0.417 -0.176 9
0.4 -0.433 -0.057 8
0.691 -0.431 0.146 8
0.749 -0.382 0.435 9
0.635 -0.334 0.717 8
0.477 -0.207 0.963 8
0.348 0.008 1.031 9
0.313 0.007 0.928 8
0.265 0.216 0.782 7
0.306 0.398 0.607 10
0.473 0.517 0.599 8
0.656 0.632 0.649 9
0.662 0.756 0.562 8
0.579 0.772 0.444 9
0.521 0.695 0.399 8
0.462 0.709 0.357 8
0.396 0.796 0.304 9
0.287 0.862 0.188 8
0.283 0.881 0.306 9
0.327 0.894 0.659 8
0.294 0.805 0.593 7
0.148 0.791 0.752 10
-0.053 0.7 0.747 8
-0.219 0.596 0.73 9
-0.463 0.52 0.664 8
-0.678 0.461 0.709 8
-0.81 0.412 0.823 9
-0.907 0.436 0.728 8
-0.816 0.392 0.655 8
-0.804 0.512 0.408 9
-0.66 0.581 0.272 8
-0.378 0.581 0.241 9
-0.067 0.583 0.283 6
0.125 0.672 0.322 10
0.204 0.767 0.243 9
0.183 0.69 0.218 8
0.207 0.688 0.16 9
0.211 0.676 0.239 8
0.197 0.61 0.242 8
0.186 0.432 0.148 9
0.187 0.26 0.165 8
0.197 0.186 0.248 9
0.178 0.168 0.224 8
0.211 0.191 0.286 8
0.239 0.299 0.253 7
0.201 0.415 0.143 10
0.107 0.463 0.055 9
0.037 0.459 0.055 8
-0.013 0.389 0.141 8
-0.011 0.35 0.127 9
-0.039 0.254 0.208 8
0.011 0.173 0.211 9
0.251 0.123 0.14 8
0.585 0.105 0.028 8
0.739 0.106 -0.069 9
0.665 0.154 -0.047 8
0.598 0.138 -0.042 7
0.247 0.189 0.109 10
-0.15 0.208 0.238 8
-0.509 0.23 0.268 9
-0.612 0.224 0.157 8
-0.446 0.229 0.068 8
-0.402 0.206 0.061 9
-0.183 0.352 -0.05 8
0.187 0.41 -0.165 9
0.61 0.345 -0.085 8
0.85 0.325 0.113 8
0.899 0.302 0.396 9
0.809 0.272 0.356 7
0.693 0.306 0.603 10
0.526 0.353 0.622 8
0.357 0.346 0.415 8
0.147 0.325 0.148 9
-0.094 0.251 -0.112 8
-0.299 0.094 -0.258 9
-0.45 -0.022 -0.259 8
-0.405 -0.02 -0.233 8
-0.561 -0.079 -0.185 9
-0.655 -0.125 -0.123 8
# end
#Thu Feb 26 20:26:06 GMT+08:00 2015-
