# Supplementary material for: Abnormal Gait Behavior Detection for Elderly Based on Enhanced Wigner-Ville Analysis and Cloud Incremental SVM Learning
Source: Hindawi journal article supplement (doi:10.1155/2016/5869238), 2016-01-01
Supplement: f1 [file 5869238.f1.zip › Supplementary Materials/Original Data/Lying on a bed then standing/original__48.txt]

# Accelerometer Values
# filename:  original__48.txt
# Saving start time: Thu Feb 26 20:26:08 GMT+08:00 2015

# sensor resolution: 0.0095825195m/s^2
#Sensorvendor: KIONIX, name: KX023 Accelerometer, type: 1,version : 1, range 39.240005

# X value, Y value, Z value, time diff in ms
-0.147 -0.234 0.137 8
-0.161 -0.234 0.191 8
-0.144 -0.211 0.172 9
-0.145 -0.207 0.185 8
-0.132 -0.184 0.16 9
-0.082 -0.146 0.06 8
-0.011 -0.081 -0.113 8
0.018 0.014 -0.305 9
0.001 0.089 -0.431 8
0.001 0.08 -0.388 9
-0.015 0.099 -0.39 6
-0.033 0.047 -0.305 10
-0.048 -0.039 -0.177 9
-0.058 -0.101 -0.011 8
-0.07 -0.138 0.159 9
-0.076 -0.159 0.284 8
-0.068 -0.143 0.255 8
-0.056 -0.151 0.308 9
0.018 -0.14 0.309 8
0.115 -0.123 0.303 8
0.189 -0.112 0.27 9
0.21 -0.1 0.176 8
0.189 -0.09 0.159 7
0.169 -0.073 0.032 10
0.162 -0.042 -0.075 8
0.152 -0.005 -0.128 9
0.119 0.007 -0.097 8
0.072 -0.005 0.0 9
0.046 -0.02 0.087 8
0.063 -0.03 0.155 8
0.057 -0.027 0.14 9
0.086 -0.031 0.219 8
0.15 -0.037 0.266 9
0.23 -0.04 0.264 8
0.271 -0.026 0.211 7
0.286 0.009 0.093 10
0.273 0.07 -0.044 8
0.245 0.063 -0.04 9
0.197 0.175 -0.098 8
0.08 0.242 -0.132 8
-0.108 0.146 -0.328 9
-0.252 0.011 -0.475 8
-0.282 -0.008 -0.349 9
-0.151 0.071 -0.249 8
-0.136 0.064 -0.224 8
0.111 0.189 -0.278 9
0.325 0.347 -0.324 6
0.407 0.515 -0.39 10
0.314 0.576 -0.527 9
0.113 0.501 -0.637 8
-0.082 0.321 -0.697 9
-0.073 0.289 -0.628 8
-0.183 0.068 -0.614 8
-0.173 0.01 -0.518 9
-0.055 0.119 -0.477 8
0.094 0.221 -0.573 9
0.201 0.285 -0.733 8
0.271 0.353 -0.898 8
0.244 0.318 -0.808 7
0.274 0.397 -0.923 10
0.249 0.437 -0.883 9
0.202 0.399 -0.761 8
0.16 0.314 -0.665 8
0.12 0.229 -0.532 9
0.109 0.144 -0.329 8
0.098 0.129 -0.296 9
0.138 0.056 -0.206 8
0.222 0.003 -0.295 8
0.296 -0.018 -0.44 9
0.349 -0.019 -0.534 8
0.314 -0.017 -0.481 7
0.382 -0.054 -0.553 10
0.416 -0.117 -0.498 8
0.382 -0.223 -0.405 9
0.29 -0.366 -0.206 8
0.198 -0.476 0.043 8
0.147 -0.534 0.143 9
0.094 -0.545 0.09 8
0.085 -0.49 0.081 9
0.051 -0.507 0.057 8
0.079 -0.573 -0.021 8
0.136 -0.679 -0.14 9
0.184 -0.786 -0.087 7
0.212 -0.885 0.086 10
0.261 -0.972 0.212 8
0.235 -0.875 0.191 8
0.3 -0.912 0.269 9
0.32 -0.89 0.352 8
0.325 -0.835 0.389 9
0.388 -0.768 0.296 8
0.511 -0.701 0.036 8
0.607 -0.637 -0.244 9
0.547 -0.573 -0.22 8
0.555 -0.53 -0.371 9
0.429 -0.504 -0.417 6
0.204 -0.494 -0.416 10
-0.039 -0.506 -0.408 9
-0.241 -0.525 -0.396 8
-0.366 -0.512 -0.375 8
-0.33 -0.461 -0.337 9
-0.374 -0.396 -0.333 8
-0.331 -0.294 -0.337 9
-0.187 -0.2 -0.365 8
0.038 -0.127 -0.393 8
0.313 -0.071 -0.319 9
0.526 -0.022 -0.201 8
0.473 -0.02 -0.181 7
0.528 0.002 -0.103 10
0.424 0.039 -0.004 8
0.223 0.135 0.056 9
0.07 0.242 0.034 8
0.088 0.316 0.028 9
0.233 0.382 0.089 8
0.21 0.343 0.08 8
0.344 0.44 0.243 9
0.541 0.513 0.424 8
0.778 0.523 0.578 9
0.921 0.502 0.692 8
0.924 0.515 0.712 7
0.863 0.527 0.633 10
0.777 0.474 0.569 8
0.692 0.425 0.428 8
0.467 0.369 0.38 9
0.219 0.296 0.432 8
0.092 0.172 0.47 9
0.0 0.111 0.494 8
-0.091 0.101 0.502 8
-0.082 0.091 0.451 9
-0.071 0.107 0.441 8
0.096 0.185 0.439 9
0.34 0.259 0.527 6
0.6 0.272 0.756 10
0.772 0.283 0.968 9
0.765 0.316 1.048 8
0.689 0.285 0.943 9
0.566 0.281 0.94 8
0.382 0.3 0.843 8
0.126 0.526 0.646 9
0.0 0.58 0.3 8
0.065 0.342 -0.161 9
0.155 0.213 -0.432 8
0.14 0.191 -0.389 8
0.257 0.263 -0.397 7
0.333 0.47 -0.329 10
0.394 0.579 -0.14 9
0.554 0.643 0.133 8
0.631 0.806 0.249 8
0.592 0.915 0.027 9
0.532 0.823 0.024 8
0.48 0.764 -0.359 8
0.276 0.706 -0.431 9
-0.064 0.766 -0.177 8
-0.303 0.786 0.069 9
-0.264 0.584 0.391 8
-0.238 0.526 0.352 7
-0.118 0.196 0.712 10
-0.13 -0.008 0.898 8
-0.059 -0.145 0.817 9
0.101 -0.102 0.617 8
0.13 0.348 0.606 8
0.124 0.825 0.619 9
0.112 0.882 0.452 8
0.101 0.794 0.407 9
0.253 0.8 0.621 8
0.269 0.856 1.319 8
0.101 0.579 1.776 9
-0.054 0.271 2.039 6
-0.154 0.156 2.17 11
-0.139 0.14 1.953 8
-0.124 0.139 1.735 8
0.027 0.26 1.403 9
0.094 0.49 1.123 8
0.093 0.703 0.694 9
0.102 0.894 0.265 8
0.057 1.15 0.029 8
0.052 1.035 0.026 9
0.093 1.145 -0.018 8
0.099 1.114 -0.033 8
-0.132 1.049 -0.087 7
-0.426 0.915 0.013 10
-0.541 0.66 0.314 9
-0.4 0.287 0.606 8
-0.36 0.259 0.545 8
-0.208 -0.008 0.67 9
-0.255 -0.003 0.633 8
-0.292 0.029 0.35 9
-0.17 -0.002 -0.15 8
0.015 -0.002 -0.64 8
0.125 0.051 -0.95 9
0.112 0.046 -0.855 8
0.084 0.14 -1.001 7
0.074 0.154 -1.005 10
0.152 0.09 -0.904 8
0.333 -0.053 -0.647 9
0.529 -0.223 -0.262 8
0.67 -0.368 0.073 9
0.603 -0.331 0.065 8
0.781 -0.594 0.217 8
0.793 -0.94 0.197 9
0.483 -1.056 0.033 8
0.202 -1.003 -0.248 8
0.162 -0.938 -0.601 9
0.146 -0.844 -0.541 7
0.261 -0.757 -1.012 10
0.45 -0.59 -1.56 8
0.702 -0.466 -2.039 8
1.07 -0.36 -2.246 9
1.553 -0.328 -2.16 8
1.838 -0.496 -1.797 9
1.69 -0.612 -1.187 8
1.521 -0.551 -1.069 8
1.293 -0.563 -0.386 9
1.246 -0.534 0.045 8
1.174 -0.389 -0.038 9
0.891 -0.242 -0.559 6
0.588 -0.308 -1.355 10
0.415 -0.455 -2.089 9
0.374 -0.41 -1.88 8
0.203 -0.556 -2.259 9
-0.066 -0.738 -1.99 8
-0.278 -0.85 -1.123 8
-0.219 -0.859 -0.025 9
0.058 -0.802 0.873 8
0.293 -0.717 1.238 9
0.264 -0.646 1.114 8
0.299 -0.584 0.918 8
0.117 -0.553 0.258 7
-0.094 -0.489 -0.638 10
-0.069 -0.446 -1.302 8
-0.014 -0.474 -1.607 9
-0.152 -0.373 -1.524 8
-0.137 -0.335 -1.372 9
-0.057 -0.238 -0.961 8
0.214 -0.233 -0.382 8
0.303 -0.2 0.424 9
0.074 -0.166 1.255 8
-0.432 -0.127 1.756 9
-0.913 -0.082 1.696 8
-0.822 -0.074 1.526 7
-1.124 0.021 0.987 10
-1.267 0.191 0.223 8
-1.332 0.397 -0.547 9
-1.519 0.664 -1.117 8
-1.49 0.757 -1.489 8
-1.178 0.746 -1.731 9
-1.06 0.672 -1.558 8
-0.87 0.835 -1.493 9
-0.83 0.977 -1.129 8
-1.068 1.105 -0.652 8
-1.441 1.201 -0.271 9
-1.636 1.218 -0.07 6
-1.619 1.209 0.027 10
-1.457 1.088 0.025 9
-1.376 1.114 0.121 8
-1.243 1.173 0.247 9
-1.008 1.19 0.281 8
-0.547 1.13 0.2 8
0.052 1.067 0.066 9
0.42 1.043 -0.038 8
0.378 0.939 -0.034 9
0.347 0.884 -0.072 8
0.005 0.732 -0.076 8
-0.476 0.496 -0.055 7
-0.938 0.272 -0.008 10
-1.24 0.136 0.062 9
-1.265 0.04 0.069 8
-1.138 0.036 0.062 8
-0.923 -0.027 0.011 9
-0.63 -0.062 -0.018 8
-0.442 -0.086 -0.035 9
-0.449 -0.119 -0.064 8
-0.622 -0.145 -0.088 8
-0.844 -0.148 -0.078 9
-0.759 -0.133 -0.07 8
-0.886 -0.174 -0.019 7
-0.842 -0.247 0.235 10
-0.707 -0.291 0.735 8
-0.522 -0.338 1.183 9
-0.176 -0.432 1.424 8
0.244 -0.539 1.472 8
0.219 -0.485 1.325 9
0.635 -0.597 1.121 8
1.009 -0.701 0.729 9
1.154 -0.765 0.391 8
1.056 -0.761 0.117 8
0.795 -0.729 -0.081 9
0.716 -0.656 -0.073 7
0.442 -0.604 -0.096 10
0.341 -0.508 -0.151 8
0.47 -0.39 -0.454 8
0.65 -0.267 -0.909 9
0.679 -0.164 -1.365 8
0.513 -0.097 -1.616 9
0.462 -0.088 -1.454 8
0.162 -0.05 -1.309 8
-0.179 -0.056 -0.897 9
-0.513 -0.114 -0.241 8
-0.793 -0.144 0.281 9
-0.947 -0.124 0.291 6
-0.991 -0.066 -0.157 10
-0.892 -0.06 -0.141 9
-0.847 0.07 -0.75 8
-0.699 0.262 -1.319 9
-0.459 0.495 -1.631 8
-0.118 0.695 -1.621 8
0.207 0.818 -1.297 9
0.39 0.9 -0.773 8
0.351 0.81 -0.696 8
0.425 0.844 -0.181 9
0.419 0.834 0.202 8
0.365 0.787 0.367 7
0.276 0.687 0.322 10
0.07 0.541 0.282 8
-0.236 0.387 0.366 9
-0.213 0.348 0.329 8
-0.481 0.232 0.434 9
-0.568 0.13 0.482 8
-0.424 0.046 0.467 8
-0.229 0.02 0.401 9
-0.171 0.041 0.235 8
-0.198 0.078 -0.084 9
-0.178 0.07 -0.075 8
-0.21 0.123 -0.511 7
-0.271 0.154 -0.89 10
-0.408 0.148 -0.944 8
-0.618 0.113 -0.686 9
-0.717 0.023 -0.365 8
-0.521 -0.119 -0.09 8
-0.469 -0.107 -0.081 9
-0.12 -0.201 0.011 8
0.181 -0.14 -0.196 8
0.327 -0.008 -0.632 9
0.281 0.094 -0.955 8
0.171 0.175 -0.99 9
0.154 0.158 -0.891 6
0.133 0.233 -0.817 10
0.13 0.258 -0.67 9
0.058 0.203 -0.488 8
0.017 0.142 -0.368 9
0.096 0.097 -0.322 8
0.195 0.069 -0.416 8
0.249 0.08 -0.608 9
0.224 0.072 -0.547 8
0.298 0.142 -0.803 9
0.41 0.215 -1.071 8
0.635 0.217 -1.142 8
0.919 0.163 -0.921 7
1.09 0.077 -0.557 10
1.129 -0.037 -0.178 9
1.016 -0.033 -0.16 8
1.007 -0.204 0.202 8
0.963 -0.396 0.504 9
0.869 -0.527 0.706 8
0.768 -0.577 0.792 9
0.732 -0.522 0.79 8
0.82 -0.334 0.638 8
0.738 -0.3 0.574 9
0.83 -0.072 0.208 8
0.719 0.124 -0.178 7
0.513 0.318 -0.431 10
0.431 0.471 -0.594 8
0.51 0.551 -0.605 9
0.602 0.609 -0.479 8
0.542 0.548 -0.431 8
0.609 0.563 -0.194 9
0.712 0.487 0.132 8
0.813 0.358 0.413 9
0.847 0.205 0.537 8
0.788 0.069 0.393 8
0.709 0.062 0.354 9
0.634 -0.01 -0.023 7
0.586 -0.003 -0.485 10
0.538 0.057 -0.877 8
0.43 0.124 -1.034 8
0.297 0.138 -0.876 9
0.213 0.065 -0.558 8
0.192 0.058 -0.503 9
0.105 -0.044 -0.17 8
0.06 -0.123 0.183 8
0.173 -0.132 0.455 9
0.337 -0.103 0.459 8
0.479 0.078 0.331 9
0.431 0.07 0.298 6
0.517 0.327 0.113 10
0.523 0.444 -0.165 9
0.57 0.495 -0.29 8
0.649 0.479 -0.263 8
0.737 0.411 -0.143 9
0.787 0.311 0.12 8
0.691 0.17 0.406 9
0.622 0.153 0.366 8
0.447 0.027 0.441 8
0.26 -0.032 0.218 9
0.076 -0.016 -0.043 8
-0.018 0.013 -0.177 7
0.096 0.047 -0.179 10
0.274 0.078 -0.014 8
0.247 0.07 -0.012 9
0.245 0.034 0.264 8
0.064 -0.076 0.503 9
-0.11 -0.227 0.616 8
-0.195 -0.329 0.612 8
-0.259 -0.331 0.549 9
-0.275 -0.252 0.389 8
-0.248 -0.227 0.35 8
-0.145 -0.117 0.129 9
0.089 -0.028 -0.092 7
0.328 0.014 -0.298 10
0.302 0.039 -0.378 8
0.025 0.014 -0.36 8
-0.328 -0.079 -0.301 9
-0.295 -0.071 -0.271 8
-0.56 -0.174 -0.218 9
-0.66 -0.245 -0.225 8
-0.69 -0.267 -0.266 8
-0.658 -0.264 -0.299 9
-0.561 -0.253 -0.3 8
-0.386 -0.24 -0.254 9
-0.347 -0.216 -0.228 6
-0.185 -0.203 -0.103 10
-0.189 -0.185 0.085 9
-0.302 -0.175 0.235 8
-0.435 -0.172 0.317 9
-0.582 -0.161 0.362 8
-0.682 -0.149 0.276 8
-0.614 -0.134 0.248 9
-0.633 -0.134 0.011 8
-0.574 -0.17 -0.2 9
-0.503 -0.212 -0.293 8
-0.445 -0.263 -0.315 8
-0.397 -0.322 -0.291 7
-0.378 -0.36 -0.182 10
-0.34 -0.324 -0.164 8
-0.348 -0.363 0.094 9
-0.393 -0.398 0.391 8
-0.479 -0.449 0.555 9
-0.544 -0.477 0.595 8
-0.538 -0.461 0.508 8
-0.459 -0.412 0.41 9
-0.413 -0.371 0.369 8
-0.273 -0.295 0.399 9
-0.063 -0.213 0.446 8
0.151 -0.087 0.464 7
0.285 0.069 0.478 10
0.348 0.179 0.494 8
0.397 0.244 0.513 9
0.357 0.219 0.462 8
0.392 0.267 0.42 8
0.362 0.317 0.252 9
0.312 0.378 -0.027 8
0.36 0.475 -0.351 9
0.521 0.587 -0.599 8
0.662 0.656 -0.706 8
0.596 0.591 -0.635 9
0.65 0.627 -0.652 6
0.648 0.635 -0.618 11
0.614 0.603 -0.508 8
0.58 0.541 -0.331 8
0.611 0.481 -0.171 9
0.731 0.428 -0.066 8
0.658 0.385 -0.06 8
0.798 0.341 -0.003 9
0.891 0.319 -0.032 8
0.917 0.314 -0.152 9
0.89 0.319 -0.292 8
0.842 0.328 -0.454 8
0.758 0.295 -0.408 7
0.704 0.294 -0.589 10
0.646 0.277 -0.67 9
0.654 0.264 -0.583 8
0.818 0.258 -0.466 8
1.069 0.262 -0.46 9
1.211 0.267 -0.592 8
1.09 0.24 -0.533 9
1.092 0.25 -0.724 8
0.988 0.262 -0.83 8
0.908 0.241 -0.838 9
0.873 0.193 -0.8 8
0.802 0.146 -0.734 7
0.711 0.09 -0.656 10
0.64 0.081 -0.59 8
0.478 0.01 -0.525 9
0.223 -0.062 -0.383 8
-0.047 -0.094 -0.116 9
-0.235 -0.113 0.189 8
-0.332 -0.134 0.408 8
-0.382 -0.179 0.497 9
-0.344 -0.161 0.448 8
-0.358 -0.286 0.464 8
-0.466 -0.441 0.45 9
-0.79 -0.556 0.419 7
-1.252 -0.652 0.374 10
-1.626 -0.737 0.312 8
-1.787 -0.76 0.192 8
-1.609 -0.684 0.173 9
-1.669 -0.722 0.099 8
-1.712 -0.78 0.161 9
-1.734 -0.812 0.331 8
-1.752 -0.839 0.64 8
-1.737 -0.861 0.943 9
-1.573 -0.894 1.075 8
-1.416 -0.805 0.967 9
-1.253 -0.825 0.976 6
-1.293 -0.794 0.992 10
-1.546 -0.75 1.136 9
-1.874 -0.693 1.284 8
-2.139 -0.614 1.168 9
-2.344 -0.505 0.737 8
-2.11 -0.455 0.663 8
-2.236 -0.3 0.058 9
-2.144 -0.125 -0.529 8
-1.783 0.024 -0.942 9
-1.36 0.188 -1.139 8
-1.251 0.332 -1.066 8
-1.126 0.299 -0.959 7
-1.34 0.315 -0.632 10
-1.591 0.193 -0.033 8
-1.669 0.007 0.698 9
-1.492 -0.166 1.285 8
-1.165 -0.293 1.616 9
-0.788 -0.345 1.725 8
-0.457 -0.313 1.624 8
-0.411 -0.282 1.462 9
-0.195 -0.232 1.211 8
-0.038 -0.184 0.898 9
0.147 -0.144 0.573 8
0.391 -0.169 0.426 7
0.512 -0.224 0.504 10
0.394 -0.254 0.612 8
0.355 -0.229 0.551 9
0.1 -0.25 0.58 8
-0.185 -0.254 0.534 8
-0.333 -0.244 0.412 9
-0.217 -0.215 0.228 8
0.031 -0.15 0.118 9
0.196 -0.098 0.145 8
0.177 -0.089 0.13 8
0.132 -0.07 0.279 9
-0.174 -0.059 0.578 6
-0.657 -0.049 0.904 10
-1.07 -0.006 1.076 9
-1.138 0.065 1.083 8
-1.024 0.058 0.975 9
-0.512 0.126 0.93 8
0.454 0.231 1.062 8
1.209 0.413 1.402 9
1.237 0.599 1.639 8
0.702 0.689 1.632 9
0.154 0.671 1.489 8
0.138 0.604 1.34 8
-0.232 0.555 1.103 7
-0.615 0.547 0.653 10
-0.487 0.657 0.05 9
0.166 0.9 -0.533 8
0.723 1.119 -0.908 8
1.347 1.11 -0.851 9
1.212 0.999 -0.765 8
1.54 0.873 -0.417 9
1.074 0.651 -0.077 8
0.302 0.291 0.335 8
-0.27 0.038 0.892 9
-0.427 -0.271 1.41 8
-0.384 -0.244 1.269 7
-0.07 -0.67 1.706 10
0.462 -1.037 2.011 8
1.068 -1.405 2.096 9
1.905 -1.488 2.118 8
2.547 -1.524 2.028 8
2.487 -1.823 1.548 9
1.919 -1.935 0.796 8
1.727 -1.741 0.716 9
1.15 -1.562 -0.221 8
0.833 -1.369 -1.092 8
0.631 -1.236 -1.371 9
0.445 -1.186 -1.235 7
0.359 -1.229 -0.856 10
0.458 -1.19 -0.167 8
0.412 -1.071 -0.15 8
0.848 -0.989 0.632 9
1.284 -0.829 0.36 8
1.109 -0.813 -1.116 9
0.621 -0.57 -1.942 8
0.283 0.215 -1.208 8
0.179 0.857 0.28 9
0.161 0.772 0.252 8
0.316 0.964 0.467 9
0.642 0.745 -0.689 6
0.97 0.205 -1.61 10
1.139 -0.389 -1.812 9
1.064 -0.622 -1.41 8
0.861 -0.454 -0.822 9
0.775 -0.408 -0.74 8
0.642 -0.134 -0.462 8
0.658 0.028 -0.611 9
0.766 0.083 -0.997 8
0.774 0.197 -1.565 8
0.608 0.445 -2.108 9
0.286 0.668 -2.261 8
0.258 0.601 -2.035 7
-0.169 0.595 -1.608 10
-0.63 0.252 -0.86 8
-1.164 -0.074 -0.162 9
-1.679 0.029 0.438 8
-1.898 0.338 0.804 9
-1.558 0.454 0.837 8
-1.402 0.409 0.754 8
-0.703 0.309 0.435 9
-0.12 0.287 0.071 8
0.195 0.361 0.125 9
0.25 0.297 0.504 8
0.225 0.267 0.454 7
0.031 0.116 1.284 10
-0.37 0.105 1.156 8
-0.765 0.079 1.494 9
-0.826 0.192 1.832 8
-0.514 0.357 2.047 8
-0.006 0.591 2.112 9
0.529 0.823 2.128 8
0.476 0.741 1.915 8
0.829 0.946 1.791 9
0.908 1.169 1.436 8
0.736 1.351 1.112 9
0.37 1.334 1.034 6
-0.032 1.118 1.158 10
-0.365 0.902 1.404 9
-0.328 0.812 1.264 8
-0.528 0.764 1.469 9
-0.434 0.747 1.546 8
-0.094 0.549 1.572 8
0.112 0.274 1.576 9
-0.121 0.156 1.64 8
-0.664 0.168 1.742 9
-0.597 0.151 1.568 8
-1.116 0.153 1.612 8
-1.497 0.188 1.556 7
-1.637 0.124 1.44 10
-1.564 0.007 1.311 9
-1.371 0.023 1.225 8
-1.032 0.009 1.117 8
-0.929 0.008 1.005 9
-0.757 -0.009 0.881 8
-0.775 -0.263 0.778 9
-0.893 -0.738 0.639 8
-1.208 -1.206 0.718 8
-1.725 -1.275 1.236 9
-1.971 -1.042 1.622 8
-1.774 -0.938 1.46 7
-1.371 -0.773 1.244 10
-0.536 -0.533 0.565 8
0.322 -0.372 -0.212 9
0.699 -0.278 -0.74 8
0.519 -0.267 -1.145 8
-0.039 -0.391 -1.479 9
-0.035 -0.352 -1.331 8
-0.832 -0.605 -1.449 9
-1.372 -0.854 -1.371 8
-1.441 -1.153 -1.445 8
-1.697 -1.2 -1.65 9
-2.042 -0.783 -1.37 7
-1.642 -0.826 -1.193 10
-1.478 -0.744 -1.074 8
-0.692 -1.079 -1.362 8
-0.099 -1.17 -1.484 9
0.274 -1.282 -1.543 8
0.381 -1.328 -1.749 9
0.256 -1.298 -1.961 8
0.034 -1.244 -1.808 8
0.031 -1.119 -1.627 9
-0.228 -1.115 -1.128 8
-0.629 -1.158 -0.556 8
-0.795 -1.208 0.021 7
-0.251 -1.309 0.442 10
0.674 -1.373 0.568 9
1.322 -1.292 0.519 8
1.189 -1.162 0.467 8
1.406 -1.245 0.263 9
1.183 -1.232 -0.035 8
0.554 -0.992 -0.271 9
-0.08 -0.912 -0.536 8
-0.509 -0.757 -0.946 8
-0.458 -0.682 -0.852 9
-0.776 -0.423 -1.216 8
-0.892 -0.315 -1.237 7
-0.655 -0.299 -0.982 10
-0.208 -0.29 -0.889 8
0.178 -0.416 -0.872 9
0.348 -0.483 -0.59 8
0.313 -0.435 -0.531 9
0.25 -0.402 -0.455 8
0.084 -0.429 -0.66 8
-0.04 -0.302 -0.799 9
-0.168 -0.218 -1.027 8
-0.319 -0.416 -1.294 8
-0.341 -0.651 -1.152 9
-0.307 -0.586 -1.037 7
-0.286 -0.546 -0.776 10
-0.302 -0.478 -0.719 8
-0.292 -0.561 -0.558 9
-0.248 -0.541 -0.276 8
-0.167 -0.507 -0.009 8
-0.127 -0.439 0.095 9
-0.115 -0.395 0.086 8
-0.114 -0.277 -0.018 8
-0.047 -0.188 -0.24 9
-0.037 -0.092 -0.584 8
-0.121 0.056 -0.874 9
-0.312 0.175 -0.967 6
-0.59 0.128 -0.962 10
-0.531 0.115 -0.865 9
-0.703 0.109 -0.757 8
-0.702 0.225 -0.509 9
-0.494 0.297 -0.299 8
-0.195 0.317 -0.265 8
0.023 0.327 -0.378 9
0.139 0.364 -0.543 8
0.125 0.328 -0.488 9
0.133 0.387 -0.659 8
-0.056 0.423 -0.728 8
-0.41 0.426 -0.634 7
-0.672 0.433 -0.501 10
-0.766 0.443 -0.382 9
-0.763 0.503 -0.291 8
-0.687 0.452 -0.262 8
-0.494 0.582 -0.212 9
0.013 0.67 -0.185 8
0.639 0.686 -0.105 8
0.935 0.727 0.07 9
0.755 0.824 0.16 8
0.249 0.91 0.163 9
0.224 0.819 0.147 8
-0.331 0.893 0.203 7
-0.773 0.914 0.363 10
-1.112 0.881 0.571 8
-1.303 0.862 0.719 9
-1.255 0.893 0.756 8
-0.919 0.919 0.655 8
-0.827 0.827 0.59 9
-0.449 0.82 0.388 8
-0.17 0.837 0.229 9
0.002 0.892 0.169 8
0.029 0.887 0.148 8
-0.041 0.85 0.22 9
-0.037 0.765 0.198 6
-0.109 0.74 0.347 11
-0.139 0.676 0.575 8
-0.142 0.565 0.803 8
-0.108 0.454 0.884 9
# end
#Thu Feb 26 20:26:14 GMT+08:00 20151
