# Supplementary material for: Abnormal Gait Behavior Detection for Elderly Based on Enhanced Wigner-Ville Analysis and Cloud Incremental SVM Learning
Source: Hindawi journal article supplement (doi:10.1155/2016/5869238), 2016-01-01
Supplement: f1 [file 5869238.f1.zip › Supplementary Materials/Original Data/Lying on a bed then standing/original__49.txt]

# Accelerometer Values
# filename:  original__49.txt
# Saving start time: Thu Feb 26 20:26:16 GMT+08:00 2015

# sensor resolution: 0.0095825195m/s^2
#Sensorvendor: KIONIX, name: KX023 Accelerometer, type: 1,version : 1, range 39.240005

# X value, Y value, Z value, time diff in ms
-0.043 0.062 -0.353 9
-0.223 0.02 -0.127 8
-0.335 -0.036 -0.011 8
-0.287 -0.162 0.1 9
-0.258 -0.145 0.09 8
-0.024 -0.354 0.321 9
0.104 -0.401 0.352 8
0.012 -0.162 0.346 8
0.044 -0.059 0.364 9
0.233 -0.154 0.179 8
0.209 -0.138 0.161 7
0.275 -0.128 -0.119 10
0.185 -0.018 -0.36 8
-0.022 0.079 -0.553 9
-0.23 0.127 -0.568 8
-0.324 0.113 -0.388 9
-0.339 0.049 -0.223 8
-0.205 -0.032 -0.06 8
-0.184 -0.029 -0.054 9
0.125 -0.093 0.164 8
0.448 -0.084 0.23 8
0.687 -0.038 0.199 9
0.768 0.007 0.142 7
0.653 0.083 0.029 10
0.42 0.16 -0.054 8
0.378 0.144 -0.048 8
0.122 0.185 -0.054 9
-0.06 0.171 -0.008 8
-0.122 0.126 0.052 9
-0.09 0.08 0.069 8
0.014 0.044 -0.003 8
0.166 0.021 -0.094 9
0.149 0.019 -0.085 8
0.307 0.023 -0.129 9
0.416 0.035 -0.14 6
0.439 0.048 -0.137 10
0.366 0.07 -0.125 9
0.235 0.096 -0.09 8
0.102 0.106 -0.018 9
0.092 0.095 -0.016 8
0.017 0.079 0.111 8
-0.037 0.05 0.125 9
-0.116 0.019 0.025 8
-0.143 0.005 0.015 9
-0.08 0.003 0.003 8
-0.072 0.003 0.002 8
0.086 0.004 -0.057 7
0.286 0.025 -0.098 10
0.393 0.062 -0.111 8
0.334 0.086 -0.102 9
0.176 0.089 -0.066 8
-0.007 0.072 0.029 9
-0.007 0.064 0.026 8
-0.174 0.034 0.081 8
-0.265 -0.001 0.034 9
-0.3 -0.016 -0.027 8
-0.307 -0.02 -0.072 9
-0.271 -0.03 -0.095 8
-0.244 -0.027 -0.086 7
-0.107 -0.035 -0.096 10
0.082 -0.021 -0.113 8
0.176 0.018 -0.132 9
0.14 0.057 -0.114 8
0.015 0.075 -0.078 8
-0.12 0.064 -0.052 9
-0.201 0.04 -0.038 8
-0.181 0.036 -0.034 9
-0.18 0.021 -0.035 8
-0.145 0.013 -0.043 8
-0.129 0.0 -0.054 9
-0.119 -0.009 -0.064 6
-0.066 -0.014 -0.087 11
0.007 -0.015 -0.144 8
0.006 -0.013 -0.13 8
0.034 -0.014 -0.174 9
0.022 -0.029 -0.187 8
-0.008 -0.066 -0.19 8
-0.052 -0.082 -0.177 9
-0.117 -0.078 -0.203 8
-0.24 -0.041 -0.299 9
-0.216 -0.037 -0.269 8
-0.305 0.013 -0.244 8
-0.291 0.017 -0.165 7
-0.229 0.012 -0.188 10
-0.15 -0.019 -0.205 9
-0.066 -0.099 -0.148 8
-0.032 -0.183 -0.12 8
-0.028 -0.164 -0.108 9
-0.057 -0.277 -0.125 8
-0.112 -0.435 -0.057 9
-0.189 -0.579 -0.017 8
-0.21 -0.668 -0.183 8
-0.15 -0.692 -0.427 9
-0.135 -0.662 -0.551 8
-0.122 -0.595 -0.496 7
0.101 -0.562 -0.528 10
0.168 -0.539 -0.589 8
0.175 -0.55 -0.624 9
0.194 -0.6 -0.572 8
0.227 -0.674 -0.592 8
0.205 -0.606 -0.533 9
0.23 -0.749 -0.69 8
0.228 -0.916 -0.829 9
0.206 -1.015 -0.824 8
0.216 -1.044 -0.662 8
0.192 -1.029 -0.472 9
0.173 -0.926 -0.425 7
0.118 -0.946 -0.343 10
0.147 -1.058 -0.31 8
0.212 -1.175 -0.273 8
0.248 -1.212 -0.246 9
0.276 -1.181 -0.29 8
0.309 -1.122 -0.423 9
0.304 -1.056 -0.589 8
0.274 -0.951 -0.53 8
0.228 -0.878 -0.634 9
0.207 -0.778 -0.634 8
0.137 -0.74 -0.717 9
-0.043 -0.828 -0.869 6
-0.143 -0.823 -0.881 10
-0.123 -0.688 -0.82 9
-0.111 -0.619 -0.738 8
-0.068 -0.563 -0.694 9
-0.023 -0.58 -0.663 8
-0.013 -0.574 -0.691 8
-0.059 -0.565 -0.79 9
-0.124 -0.575 -0.825 8
-0.21 -0.491 -0.751 8
-0.189 -0.442 -0.676 9
-0.285 -0.26 -0.537 8
-0.362 -0.089 -0.373 7
-0.344 0.031 -0.307 10
-0.164 0.2 -0.136 8
0.066 0.391 0.23 9
0.268 0.505 0.596 8
0.241 0.455 0.536 9
0.43 0.559 0.841 8
0.608 0.66 1.049 8
0.792 0.802 1.254 9
0.881 1.074 1.475 8
0.772 1.369 1.649 9
0.68 1.625 1.837 8
0.612 1.462 1.653 7
0.71 1.709 1.905 10
0.997 1.863 2.08 8
1.417 1.897 2.039 9
1.858 1.884 1.828 8
2.155 1.881 1.603 8
2.117 1.839 1.465 9
1.906 1.655 1.319 8
1.399 1.557 1.305 9
0.539 1.508 1.508 8
-0.27 1.545 1.886 8
-0.774 1.581 2.227 9
-0.696 1.423 2.005 6
-0.727 1.451 2.156 10
-0.291 1.507 1.986 9
0.371 1.59 1.555 8
1.056 1.643 1.064 9
1.494 1.628 0.649 8
1.571 1.543 0.372 8
1.303 1.314 0.253 9
1.172 1.183 0.228 8
0.643 0.947 0.229 9
0.142 0.821 0.397 8
-0.159 0.761 0.626 8
-0.213 0.767 0.739 7
0.008 0.779 0.728 10
0.427 0.775 0.614 9
0.384 0.698 0.552 8
0.767 0.671 0.398 8
0.862 0.717 0.334 9
0.81 0.656 0.37 8
0.541 0.464 0.401 9
0.042 0.389 0.382 8
-0.305 0.36 0.342 8
-0.274 0.324 0.307 9
-0.319 0.318 0.256 8
-0.001 0.392 0.122 7
0.581 0.553 -0.09 10
1.351 0.449 -0.12 8
1.829 0.193 0.202 9
1.72 0.099 0.786 8
1.548 0.089 0.707 8
1.232 -0.074 1.452 9
0.798 -0.268 2.215 8
0.414 -0.383 2.719 9
0.221 -0.461 2.813 8
0.138 -0.508 2.614 8
0.123 -0.51 2.202 9
0.111 -0.459 1.982 7
0.147 -0.315 1.374 10
0.566 -0.216 0.689 8
1.194 -0.158 0.062 8
1.382 0.088 -0.606 9
1.27 0.362 -1.387 8
1.428 0.532 -2.204 9
1.285 0.479 -1.984 8
1.747 0.397 -2.74 8
1.9 -0.181 -3.265 9
1.468 -0.895 -3.139 8
0.794 -1.464 -2.332 9
0.714 -1.318 -2.098 6
-0.372 -2.228 -0.154 10
-0.335 -2.005 -0.138 9
-0.877 -1.888 0.036 8
-1.363 -1.418 -0.699 8
-1.474 -0.976 -1.911 9
-1.214 -0.736 -3.164 8
-0.93 -0.536 -4.008 9
-0.837 -0.409 -4.224 8
-0.516 -0.368 -3.802 8
-0.147 -0.369 -3.455 9
0.024 -0.417 -2.556 8
0.053 -0.454 -1.481 7
0.147 -0.496 -0.595 10
0.266 -0.469 -0.102 8
0.239 -0.422 -0.092 9
0.301 -0.333 -0.081 8
0.306 -0.285 -0.276 9
0.236 -0.277 -0.577 8
-0.003 -0.286 -0.956 8
-0.544 -0.313 -1.085 9
-1.196 -0.325 -0.819 8
-1.076 -0.292 -0.737 9
-1.554 -0.275 -0.381 8
-1.808 -0.217 -0.217 7
-1.869 -0.108 -0.272 10
-1.76 0.044 -0.475 8
-1.519 0.215 -0.707 9
-1.235 0.382 -0.871 8
-1.111 0.344 -0.784 8
-0.908 0.446 -0.838 9
-0.925 0.439 -0.864 8
-1.223 0.476 -1.009 8
-1.673 0.453 -1.295 9
-2.138 0.457 -1.544 8
-2.527 0.347 -1.746 9
-2.274 0.312 -1.571 6
-2.397 0.276 -1.628 10
-2.131 0.554 -1.301 9
-1.548 0.742 -0.841 8
-0.802 0.923 -0.306 9
-0.225 1.118 0.037 8
0.006 1.244 -0.143 8
0.006 1.119 -0.128 9
-0.158 1.158 -0.665 8
-0.618 1.145 -1.249 9
-1.03 1.139 -1.587 8
-1.094 1.06 -1.533 8
-0.985 0.892 -0.966 7
-0.842 0.651 0.081 10
-0.758 0.586 0.073 9
-0.748 0.226 1.312 8
-0.644 -0.098 2.537 8
-0.394 -0.275 3.588 9
0.033 -0.348 4.109 8
0.481 -0.374 3.83 8
0.682 -0.354 2.88 9
0.614 -0.318 2.592 8
0.529 -0.254 1.342 9
0.371 -0.192 0.067 8
0.347 -0.16 -0.933 7
0.359 -0.14 -1.412 10
0.275 -0.108 -1.321 8
0.248 -0.097 -1.189 9
0.097 -0.044 -0.712 8
-0.093 0.079 -0.124 8
-0.24 0.242 0.375 9
-0.231 0.328 0.602 8
-0.051 0.316 0.508 9
0.162 0.215 0.132 8
0.146 0.193 0.119 8
0.194 0.05 -0.478 9
0.002 -0.083 -1.038 6
-0.389 -0.21 -1.327 11
-0.838 -0.377 -1.376 8
-1.148 -0.575 -1.334 8
-1.229 -0.685 -1.419 9
-1.106 -0.616 -1.277 8
-1.003 -0.642 -1.551 9
-0.696 -0.62 -1.843 8
-0.274 -0.58 -1.968 8
0.013 -0.537 -1.76 9
0.103 -0.516 -1.283 8
0.071 -0.531 -0.728 8
0.064 -0.478 -0.655 7
0.036 -0.473 -0.24 10
0.119 -0.453 -0.053 9
0.349 -0.408 0.002 8
0.677 -0.318 0.034 8
0.934 -0.223 0.086 9
0.993 -0.137 0.236 8
0.894 -0.123 0.212 9
0.795 -0.013 0.504 8
0.601 0.132 0.752 8
0.332 0.3 0.759 9
0.053 0.441 0.501 8
-0.123 0.575 0.139 7
-0.08 0.695 -0.092 10
-0.072 0.625 -0.083 8
0.221 0.685 -0.097 9
0.628 0.684 0.022 8
0.911 0.619 0.046 9
0.964 0.503 -0.04 8
0.845 0.444 0.021 8
0.705 0.488 0.294 9
0.635 0.439 0.264 8
0.594 0.503 0.581 8
0.595 0.518 0.843 9
0.62 0.422 0.944 7
0.728 0.215 0.888 10
0.919 -0.02 0.778 8
1.087 -0.211 0.623 8
0.978 -0.19 0.56 9
1.102 -0.317 0.422 8
1.226 -0.332 0.346 9
1.263 -0.22 0.295 8
1.141 0.011 0.125 8
0.932 0.301 -0.259 9
0.839 0.271 -0.233 8
0.651 0.5 -0.625 9
0.51 0.624 -0.891 6
0.38 0.654 -1.057 10
0.374 0.634 -1.077 9
0.571 0.595 -0.96 8
0.77 0.549 -0.74 9
0.693 0.494 -0.666 8
0.76 0.439 -0.441 8
0.728 0.34 -0.163 9
0.582 0.204 0.115 8
0.329 0.049 0.192 9
0.1 -0.111 0.008 8
-0.006 -0.232 -0.408 8
-0.005 -0.209 -0.367 7
0.075 -0.312 -0.792 10
0.29 -0.398 -1.006 8
0.474 -0.437 -0.948 9
0.659 -0.451 -0.545 8
0.878 -0.454 0.125 9
1.051 -0.431 0.738 8
0.946 -0.388 0.664 8
1.042 -0.334 0.91 9
1.048 -0.195 0.665 8
0.994 0.036 0.132 9
0.914 0.279 -0.485 8
0.842 0.436 -1.048 7
0.79 0.458 -1.403 10
0.711 0.413 -1.262 8
0.64 0.348 -1.271 9
0.503 0.201 -0.839 8
0.217 -0.09 -0.26 8
-0.183 -0.533 0.214 9
-0.629 -0.936 0.62 8
-1.022 -1.156 0.787 9
-0.92 -1.04 0.708 8
-1.113 -1.113 0.462 8
-0.946 -1.109 -0.122 9
-0.566 -1.063 -0.752 6
-0.424 -1.109 -1.057 11
-0.478 -1.371 -0.962 8
-0.684 -1.723 -0.87 8
-0.615 -1.551 -0.783 9
-1.088 -1.817 -0.707 8
-1.681 -1.689 -0.939 8
-2.043 -1.346 -1.848 9
-1.749 -1.007 -2.287 8
-1.072 -0.587 -2.087 9
-0.437 -0.269 -1.897 8
-0.393 -0.242 -1.707 8
0.025 -0.017 -1.249 7
0.202 0.108 -0.506 10
0.132 0.138 0.254 9
-0.223 0.299 1.038 8
-0.431 0.711 1.737 8
-0.162 1.324 2.05 9
-0.145 1.191 1.845 8
0.491 1.82 1.69 9
1.223 2.279 1.366 8
1.823 2.448 1.15 8
2.039 2.386 0.991 9
1.837 2.204 0.817 8
1.653 1.984 0.736 7
1.168 1.732 0.619 10
0.475 1.399 0.745 8
-0.073 1.109 1.164 9
-0.139 0.835 1.633 8
0.236 0.539 2.027 8
0.618 0.224 2.359 9
0.556 0.201 2.123 8
0.69 -0.185 2.365 9
0.455 -0.594 2.324 8
-0.112 -0.978 1.941 8
-0.657 -1.123 1.422 9
-0.875 -0.972 0.915 7
-0.574 -0.773 0.441 10
-0.516 -0.695 0.397 8
0.036 -0.338 0.055 8
0.393 0.022 -0.215 9
0.369 0.155 -0.334 8
0.048 0.147 -0.222 9
-0.133 -0.04 -0.057 8
-0.084 -0.154 0.173 8
-0.075 -0.138 0.155 9
0.144 -0.103 0.42 8
0.479 0.02 0.529 9
0.674 0.237 0.434 6
0.723 0.333 0.313 10
0.698 0.28 0.264 9
0.636 0.111 0.206 8
0.572 0.1 0.186 9
0.458 -0.02 0.063 8
0.331 -0.086 -0.253 8
0.197 -0.222 -0.735 9
0.016 -0.388 -0.998 8
-0.115 -0.583 -0.861 8
-0.092 -0.708 -0.542 9
-0.083 -0.637 -0.488 8
0.074 -0.667 -0.21 7
0.209 -0.602 -0.041 10
0.203 -0.46 -0.012 8
0.099 -0.271 -0.066 9
0.0 -0.112 -0.078 8
-0.025 -0.044 -0.038 9
-0.022 -0.039 -0.035 8
-0.006 -0.047 0.028 8
0.025 -0.024 0.095 9
0.116 0.023 0.078 8
0.217 0.02 0.017 9
0.313 0.016 -0.027 8
0.282 0.014 -0.024 7
0.387 -0.029 -0.124 10
0.365 0.006 -0.208 8
0.217 0.035 -0.259 9
0.033 -0.061 -0.205 8
-0.174 -0.185 -0.035 8
-0.298 -0.321 0.142 9
-0.34 -0.413 0.333 8
-0.306 -0.372 0.299 9
-0.255 -0.435 0.394 8
-0.075 -0.443 0.318 8
0.104 -0.412 0.161 9
0.231 -0.346 0.018 6
0.291 -0.261 -0.129 10
0.262 -0.235 -0.116 9
0.192 -0.186 -0.263 8
-0.054 -0.175 -0.268 9
-0.251 -0.186 -0.151 8
-0.157 -0.177 -0.083 8
0.033 -0.134 -0.085 9
0.009 -0.099 -0.111 8
0.008 -0.089 -0.1 9
-0.198 -0.085 -0.09 8
-0.315 -0.106 -0.05 8
-0.223 -0.118 -0.082 7
-0.122 -0.107 -0.185 10
-0.214 -0.101 -0.245 9
-0.357 -0.108 -0.181 8
-0.321 -0.097 -0.163 8
-0.357 -0.119 -0.028 9
-0.265 -0.127 0.088 8
-0.125 -0.115 0.158 9
-0.085 -0.093 0.153 8
-0.076 -0.054 0.089 8
-0.035 -0.011 -0.03 9
-0.032 -0.01 -0.027 8
-0.066 0.036 -0.195 7
-0.113 0.088 -0.296 10
-0.084 0.137 -0.237 8
0.002 0.143 -0.085 9
0.117 0.106 0.039 8
0.176 0.055 0.103 8
0.158 0.05 0.093 9
0.121 -0.005 0.114 8
0.054 -0.058 0.109 9
0.073 -0.103 0.082 8
0.147 -0.108 0.002 8
0.134 -0.077 -0.061 9
0.12 -0.069 -0.054 7
-0.024 -0.026 -0.055 10
-0.176 0.006 -0.055 8
-0.228 0.015 -0.037 8
-0.241 0.0 0.022 9
-0.265 -0.031 0.109 8
-0.25 -0.07 0.198 9
-0.167 -0.091 0.209 8
-0.151 -0.082 0.188 8
-0.028 -0.067 0.131 9
0.067 -0.041 0.095 8
0.098 -0.019 0.069 9
0.031 0.015 -0.009 6
-0.105 0.085 -0.297 10
-0.094 0.077 -0.267 9
-0.187 0.172 -0.241 8
-0.2 0.233 -0.931 8
-0.082 0.249 -0.959 9
0.121 0.234 -0.754 8
0.263 0.157 -0.263 9
0.339 0.073 0.377 8
0.305 0.066 0.339 8
0.386 0.048 0.827 9
0.466 0.125 1.043 8
0.553 0.278 1.051 7
0.68 0.417 0.842 10
0.87 0.523 0.468 8
1.067 0.623 0.12 9
0.96 0.561 0.108 8
1.149 0.659 -0.211 9
1.322 0.757 -0.628 8
1.374 0.838 -0.952 8
1.334 0.885 -1.005 9
1.406 0.904 -0.815 8
1.557 0.879 -0.57 9
1.401 0.791 -0.513 8
1.528 0.746 -0.31 7
1.575 0.683 -0.164 10
1.508 0.585 -0.049 8
1.413 0.423 0.165 9
1.456 0.227 0.396 8
1.691 0.046 0.459 8
1.522 0.041 0.413 9
1.754 -0.128 0.345 8
1.825 -0.131 0.317 8
1.69 -0.129 0.275 9
1.303 -0.185 0.156 8
0.768 -0.166 -0.116 9
0.691 -0.15 -0.104 6
0.276 -0.169 -0.525 10
0.025 -0.206 -0.994 9
-0.201 -0.269 -1.296 8
-0.612 -0.379 -1.148 9
-1.207 -0.556 -0.583 8
-1.73 -0.727 0.126 8
-1.557 -0.816 0.691 9
-1.904 -0.735 0.622 8
-2.073 -0.732 0.921 9
-2.147 -0.646 0.897 8
-2.189 -0.54 0.65 8
-2.234 -0.452 0.412 7
-2.36 -0.297 0.255 10
-2.124 -0.267 0.23 9
-2.257 -0.302 0.1 8
-2.351 -0.424 0.035 8
-2.444 -0.385 0.057 9
-2.584 -0.351 0.169 8
-2.893 -0.338 0.469 8
-3.195 -0.426 0.789 9
-2.876 -0.384 0.71 8
-3.062 -0.473 0.883 9
-3.198 -0.529 0.893 8
-3.345 -0.647 0.77 7
-3.428 -0.663 0.637 10
-3.243 -0.815 0.408 8
-3.072 -0.914 0.068 9
-2.765 -0.822 0.061 8
-2.787 -0.657 -0.154 8
-2.659 -0.555 -0.099 9
-2.316 -0.497 0.119 8
-1.788 -0.472 0.31 9
-1.334 -0.465 0.397 8
-1.088 -0.517 0.32 8
-0.979 -0.465 0.288 9
-0.836 -0.604 0.048 6
-0.693 -0.743 -0.167 11
-0.526 -0.865 -0.203 8
-0.437 -0.983 -0.123 8
-0.421 -1.081 -0.02 9
-0.4 -1.032 0.138 8
-0.36 -0.929 0.125 9
-0.317 -0.716 0.389 8
-0.103 -0.412 0.73 8
0.151 -0.033 0.967 9
0.21 0.352 0.802 8
0.198 0.636 0.264 8
0.178 0.573 0.237 7
0.263 0.721 -0.411 10
0.366 0.775 -0.807 9
0.375 0.814 -0.737 8
0.299 0.83 -0.352 8
0.098 0.863 0.226 9
-0.132 0.964 0.79 8
-0.153 1.111 1.137 9
-0.138 1.0 1.023 8
0.118 1.151 1.095 8
0.561 1.269 0.94 9
0.958 1.42 0.636 8
1.111 1.556 0.271 7
1.127 1.625 -0.007 10
1.014 1.462 -0.236 8
1.075 1.444 -0.212 9
1.172 1.316 -0.395 8
1.114 1.175 -0.378 9
0.854 1.046 -0.172 8
0.479 0.912 0.049 8
0.129 0.721 0.166 9
0.116 0.649 0.149 8
-0.08 0.34 0.127 8
-0.195 -0.032 0.032 9
-0.257 -0.413 -0.045 7
-0.174 -0.753 -0.042 10
0.131 -0.954 -0.037 8
0.575 -1.011 -0.096 8
0.517 -0.91 -0.086 9
0.893 -0.987 -0.162 8
0.929 -0.977 -0.218 9
0.819 -0.956 -0.19 8
0.829 -1.032 -0.011 8
0.852 -0.995 0.358 9
0.894 -0.908 0.718 8
0.804 -0.817 0.646 9
0.949 -0.755 0.767 6
1.08 -0.624 0.632 10
0.977 -0.447 0.257 9
0.673 -0.335 -0.222 8
0.303 -0.295 -0.644 9
0.063 -0.426 -0.91 8
0.056 -0.383 -0.819 8
0.054 -0.58 -0.8 9
0.252 -0.616 -0.513 8
0.542 -0.545 -0.056 9
0.741 -0.365 0.42 8
0.819 -0.124 0.572 8
0.737 -0.111 0.515 7
0.725 0.066 0.248 10
0.562 0.21 -0.188 8
0.279 0.387 -0.711 9
0.114 0.44 -1.147 8
0.15 0.196 -1.318 9
0.272 -0.021 -1.152 8
0.328 -0.018 -0.692 8
0.295 -0.016 -0.622 9
0.345 0.022 -0.138 8
0.57 0.07 0.315 9
0.66 0.214 0.706 8
0.599 0.419 0.954 7
0.577 0.526 0.931 10
0.519 0.473 0.837 8
0.43 0.5 0.776 9
0.283 0.465 0.876 8
0.153 0.354 1.131 8
0.28 0.21 1.544 9
0.711 0.155 2.036 8
1.21 0.252 2.587 9
1.089 0.227 2.328 8
1.505 0.427 2.696 8
1.627 0.679 2.726 9
1.323 0.967 2.477 6
1.003 1.113 2.057 11
0.898 1.006 1.464 8
0.761 0.869 0.824 8
0.685 0.782 0.742 9
0.452 0.634 0.299 8
0.365 0.39 0.094 8
0.329 0.176 0.022 9
0.122 0.091 -0.055 8
-0.033 0.07 -0.101 9
-0.111 0.138 -0.234 8
-0.1 0.124 -0.211 8
-0.155 0.381 -0.415 7
-0.306 0.639 -0.533 10
-0.736 0.758 -0.395 9
-1.214 0.76 0.05 8
-1.377 0.716 0.717 8
-1.199 0.645 1.469 9
-1.079 0.58 1.322 8
-0.6 0.462 2.112 9
-0.098 0.384 2.756 8
-0.047 0.235 2.996 8
-0.415 -0.057 2.906 9
-1.074 -0.317 2.656 8
-0.967 -0.286 2.391 7
-1.757 -0.405 2.196 10
-2.284 -0.366 2.094 8
-2.277 -0.183 2.101 9
-1.804 0.095 2.071 8
-1.135 0.327 1.802 8
-0.365 0.409 1.359 9
-0.329 0.368 1.223 8
0.392 0.394 0.517 9
0.859 0.347 -0.415 8
0.908 0.041 -1.085 8
0.341 -0.406 -1.256 9
-0.635 -0.804 -1.17 7
-1.681 -1.078 -1.041 10
-1.513 -0.97 -0.937 8
-2.124 -1.194 -0.772 8
-2.318 -1.629 -0.898 9
-2.449 -1.998 -1.361 8
-2.097 -1.649 -1.654 9
-1.22 -1.261 -2.087 8
-0.492 -1.469 -3.031 8
-0.442 -1.322 -2.728 9
-0.447 -1.487 -3.579 8
-0.912 -1.47 -3.836 9
-1.368 -1.608 -3.656 6
-1.662 -1.798 -3.176 10
-1.45 -1.941 -2.626 9
-0.589 -2.157 -2.187 8
-0.53 -1.942 -1.968 8
0.353 -2.081 -1.292 9
0.816 -1.931 -0.339 8
1.118 -1.605 0.315 9
1.354 -1.237 0.566 8
1.104 -0.624 0.646 8
0.545 -0.191 0.64 9
0.49 -0.172 0.576 8
0.313 -0.321 0.436 7
0.387 -0.576 0.149 10
0.322 -0.688 -0.174 8
0.261 -0.63 -0.681 9
0.332 -0.596 -1.389 8
0.299 -0.536 -1.25 9
0.331 -0.702 -1.944 8
0.244 -0.898 -2.498 8
0.058 -0.995 -2.784 9
-0.279 -1.006 -2.596 8
-0.814 -0.863 -1.624 9
-1.318 -0.475 -0.182 8
-1.186 -0.428 -0.163 7
-1.38 -0.047 0.604 10
-1.232 -0.038 0.483 8
-0.932 -0.283 0.132 9
-0.703 -0.555 -0.126 8
-0.563 -0.825 -0.312 8
-0.53 -1.036 -0.196 9
-0.477 -0.933 -0.176 8
-0.562 -1.096 0.184 8
-0.628 -1.168 0.453 9
-0.689 -1.115 0.565 8
-0.662 -1.013 0.476 9
-0.487 -0.884 0.355 6
-0.197 -0.78 0.29 10
-0.177 -0.702 0.261 9
0.141 -0.653 0.247 8
0.363 -0.597 0.282 9
0.459 -0.514 0.341 8
0.449 -0.382 0.377 8
0.393 -0.212 0.378 9
0.37 -0.085 0.372 8
0.333 -0.077 0.335 9
0.374 0.053 0.295 8
0.497 0.241 0.139 8
0.64 0.38 -0.017 7
0.659 0.523 -0.063 10
0.525 0.729 -0.033 9
0.266 0.889 0.006 8
0.239 0.8 0.006 8
0.015 0.695 -0.045 9
-0.133 0.548 -0.194 8
-0.387 0.779 -0.3 9
-0.645 1.265 -0.373 8
-0.743 1.753 -0.407 8
-0.669 1.577 -0.3 9
-0.663 1.42 -0.27 8
-0.574 1.948 -0.149 7
-0.37 1.612 -0.085 10
-0.192 1.408 -0.025 8
-0.099 1.332 0.005 9
-0.023 1.255 0.0 8
-0.02 1.13 0.0 8
0.025 1.103 0.005 9
0.092 0.974 0.002 8
0.21 0.774 0.071 9
0.247 0.792 0.178 8
0.199 0.808 0.551 8
0.154 0.568 1.129 9
0.139 0.511 1.016 7
0.022 0.29 1.359 10
-0.128 0.193 1.429 8
-0.149 0.236 1.241 8
-0.015 0.418 0.776 9
0.182 0.625 0.231 8
0.371 0.788 -0.204 9
0.333 0.709 -0.183 8
0.432 0.774 -0.459 8
0.382 0.725 -0.443 9
0.193 0.601 -0.265 8
-0.081 0.442 -0.078 9
-0.341 0.276 0.016 6
-0.488 0.137 -0.048 10
-0.439 0.123 -0.043 9
-0.391 -0.042 -0.155 8
-0.229 -0.169 -0.171 8
-0.023 -0.134 -0.133 9
0.237 -0.115 -0.13 8
0.489 -0.142 -0.107 9
0.594 -0.194 -0.036 8
0.535 -0.174 -0.032 8
0.397 -0.256 0.143 9
0.036 -0.295 0.35 8
-0.381 -0.299 0.423 7
-0.716 -0.228 0.364 10
-0.816 -0.166 0.178 8
-0.735 -0.041 -0.089 9
-0.661 -0.037 -0.08 8
-0.376 0.285 -0.285 9
0.091 0.473 -0.294 8
0.558 0.413 -0.097 8
0.78 0.329 0.327 9
0.769 0.221 0.91 8
0.692 0.199 0.819 9
0.511 0.02 1.234 8
0.231 -0.179 1.282 7
-0.16 -0.315 1.016 10
-0.538 -0.357 0.676 8
-0.723 -0.366 0.414 9
-0.833 -0.341 0.151 8
-0.749 -0.307 0.136 8
-0.789 -0.12 -0.084 9
-0.528 0.0 -0.166 8
-0.055 -0.076 -0.074 8
0.298 -0.126 0.151 9
0.428 -0.14 0.442 8
0.328 -0.145 0.611 9
0.295 -0.13 0.55 6
0.008 -0.151 0.481 10
-0.351 -0.165 0.262 9
-0.74 -0.118 0.045 8
-1.054 -0.064 -0.016 9
-1.151 -0.052 -0.013 8
-0.943 -0.017 -0.067 8
-0.849 -0.015 -0.06 9
-0.397 0.039 -0.122 8
0.111 0.109 -0.147 9
0.476 0.21 -0.074 8
0.574 0.263 0.072 8
0.516 0.237 0.065 7
0.17 0.228 0.096 10
0.153 0.205 0.086 9
-0.227 0.131 -0.043 8
-0.625 0.121 -0.14 8
-0.846 0.129 -0.247 9
-0.735 0.067 -0.329 8
-0.38 -0.012 -0.331 8
-0.342 -0.011 -0.377 9
-0.037 -0.01 -0.339 8
0.176 0.059 -0.401 9
0.254 0.087 -0.431 8
0.095 0.051 -0.538 7
-0.23 0.058 -0.501 10
-0.559 0.119 -0.38 8
-0.503 0.107 -0.342 9
-0.685 0.073 -0.319 8
-0.577 -0.07 -0.117 8
-0.227 -0.14 0.226 9
0.22 -0.117 0.416 8
0.659 -0.091 0.388 9
0.854 0.023 0.255 8
0.768 0.02 0.229 8
0.625 0.213 0.152 9
0.324 0.354 0.176 6
-0.081 0.358 0.278 11
-0.509 0.345 0.414 8
-0.754 0.358 0.433 8
-0.805 0.361 0.236 9
-0.725 0.325 0.212 8
-0.658 0.236 0.018 9
-0.576 0.128 0.013 8
-0.478 0.113 -0.012 8
-0.204 0.121 -0.11 9
0.134 0.097 -0.18 8
# end
#Thu Feb 26 20:26:23 GMT+08:00 20156
