# Supplementary material for: Abnormal Gait Behavior Detection for Elderly Based on Enhanced Wigner-Ville Analysis and Cloud Incremental SVM Learning
Source: Hindawi journal article supplement (doi:10.1155/2016/5869238), 2016-01-01
Supplement: f1 [file 5869238.f1.zip › Supplementary Materials/Original Data/Lying on a bed then standing/original__50.txt]

# Accelerometer Values
# filename:  original__50.txt
# Saving start time: Thu Feb 26 20:26:25 GMT+08:00 2015

# sensor resolution: 0.0095825195m/s^2
#Sensorvendor: KIONIX, name: KX023 Accelerometer, type: 1,version : 1, range 39.240005

# X value, Y value, Z value, time diff in ms
0.05 -0.149 -0.272 9
0.0 -0.179 -0.29 8
-0.04 -0.185 -0.264 8
-0.036 -0.166 -0.237 9
-0.167 -0.255 -0.346 8
-0.243 -0.403 -0.452 7
-0.272 -0.494 -0.288 10
-0.324 -0.503 0.087 8
-0.227 -0.438 0.357 9
-0.019 -0.292 0.438 8
-0.017 -0.263 0.394 8
0.136 -0.128 0.388 9
0.206 -0.117 0.391 8
0.228 -0.189 0.445 9
0.21 -0.239 0.445 8
0.146 -0.267 0.252 8
-0.007 -0.325 -0.022 9
-0.006 -0.293 -0.02 7
-0.235 -0.318 -0.172 10
-0.348 -0.221 -0.152 8
-0.209 -0.007 0.006 8
0.062 0.137 0.165 9
0.378 0.085 0.2 8
0.619 -0.017 0.156 9
0.557 -0.015 0.141 8
0.615 -0.058 0.127 8
0.501 -0.067 0.064 9
0.272 -0.086 -0.034 8
0.079 -0.098 -0.104 9
-0.053 -0.061 -0.303 6
-0.163 0.062 -0.543 10
-0.146 0.055 -0.489 9
-0.191 0.236 -0.595 8
-0.114 0.286 -0.596 8
0.101 0.16 -0.543 9
0.304 0.09 -0.464 8
0.397 0.14 -0.255 9
0.425 0.168 0.062 8
0.383 0.151 0.056 8
0.374 0.136 0.312 9
0.354 0.087 0.445 8
0.255 0.085 0.356 7
0.127 0.162 0.012 10
0.137 0.247 -0.483 8
0.252 0.353 -1.0 9
0.226 0.318 -0.9 8
0.347 0.409 -1.224 9
0.419 0.429 -1.266 8
0.469 0.371 -1.112 8
0.524 0.25 -0.828 9
0.559 0.165 -0.455 8
0.503 0.148 -0.007 8
0.578 0.133 -0.006 9
0.668 -0.136 0.295 7
0.664 -0.457 0.273 10
0.531 -0.725 0.075 8
0.378 -0.861 -0.236 9
0.483 -0.72 -0.515 8
0.434 -0.648 -0.463 8
0.401 -0.395 -0.832 9
-0.105 -0.058 -1.23 8
-0.664 0.468 -1.151 8
-1.122 0.833 -0.862 9
-1.008 0.448 -0.721 8
-0.42 -0.401 -0.727 9
-0.378 -0.36 -0.654 6
-0.093 -0.876 -0.739 10
-0.069 -1.066 -0.658 9
-0.091 -1.136 -0.477 8
-0.034 -1.188 -0.389 9
0.179 -1.296 -0.307 8
0.398 -1.416 -0.185 8
0.358 -1.275 -0.166 9
0.454 -1.348 -0.108 8
0.444 -1.364 -0.156 9
0.454 -1.32 -0.327 8
0.395 -1.174 -0.786 8
0.274 -1.112 -1.274 7
0.197 -1.224 -1.258 10
0.178 -1.102 -1.132 9
0.067 -1.154 -0.81 8
-0.047 -1.073 -0.562 8
-0.109 -1.003 -0.472 9
-0.277 -0.868 -0.466 8
-0.521 -0.604 -0.555 8
-0.483 -0.422 -0.825 9
-0.435 -0.38 -0.742 8
-0.081 -0.291 -0.959 9
0.309 -0.111 -0.956 8
0.615 0.098 -0.894 7
0.796 0.113 -0.754 10
0.728 0.05 -0.599 8
0.462 0.089 -0.609 9
0.416 0.08 -0.548 8
0.07 0.205 -0.612 8
-0.239 0.391 -0.564 9
-0.363 0.557 -0.273 8
-0.256 0.781 0.201 9
-0.002 1.129 0.675 8
0.353 1.483 0.974 8
0.317 1.335 0.877 9
0.636 1.678 0.957 6
0.744 1.912 0.873 11
0.647 1.974 0.642 8
0.481 2.005 0.456 8
0.39 1.77 0.371 9
0.351 1.342 0.419 8
0.316 1.207 0.377 8
-0.152 1.04 0.706 9
-0.216 1.0 1.131 8
0.135 0.99 1.379 9
0.67 1.064 1.571 8
1.04 1.252 1.834 8
0.936 1.127 1.651 7
0.98 1.363 1.855 10
0.952 1.563 1.933 9
1.279 1.706 1.9 8
1.888 1.823 1.765 8
2.18 1.904 1.557 9
1.807 1.951 1.291 8
1.626 1.756 1.162 9
0.893 1.823 0.888 8
0.297 1.804 0.53 8
0.171 1.703 0.11 9
0.58 1.585 -0.202 8
1.183 1.494 -0.352 7
1.6 1.46 -0.351 10
1.44 1.314 -0.316 8
1.467 1.314 -0.361 9
1.052 1.359 -0.508 8
0.459 1.469 -0.641 8
0.093 1.584 -0.733 9
0.261 1.668 -0.745 8
0.747 1.68 -0.646 9
0.672 1.512 -0.581 8
1.131 1.499 -0.256 8
1.602 1.418 0.219 9
1.912 1.35 0.677 7
1.893 1.25 1.101 10
1.646 1.087 1.473 8
1.536 0.882 1.717 8
1.382 0.794 1.545 9
1.573 0.586 1.572 8
1.686 0.448 1.519 9
1.554 0.329 1.435 8
1.485 0.321 1.404 8
1.566 0.352 1.52 9
1.596 0.376 1.714 8
1.437 0.338 1.542 9
1.603 0.385 1.718 6
1.898 0.391 1.709 10
2.005 0.342 1.314 9
1.728 0.133 0.335 8
1.059 -0.273 -1.007 9
-0.059 -0.702 -2.217 8
-0.053 -0.632 -1.995 8
-1.016 -1.12 -2.774 9
-1.309 -1.395 -3.103 8
-0.601 -1.46 -3.085 9
0.936 -1.659 -2.928 8
2.207 -1.84 -2.689 8
1.986 -1.656 -2.42 7
2.352 -1.878 -2.026 10
1.684 -2.098 -1.58 8
0.343 -2.282 -1.369 9
-1.23 -2.384 -1.578 8
-2.482 -2.613 -2.224 9
-3.249 -2.775 -3.186 8
-3.447 -2.384 -4.101 8
-3.102 -2.145 -3.69 9
-2.45 -1.405 -4.358 8
-1.266 -0.624 -4.645 9
-0.043 -0.152 -4.3 8
0.799 -0.046 -3.155 7
0.868 -0.202 -1.574 10
0.781 -0.181 -0.061 8
0.222 -0.163 -0.055 9
-0.477 -0.731 1.129 8
-1.013 -0.841 1.724 8
-1.302 -0.749 1.593 9
-1.259 -0.546 0.914 8
-0.853 -0.304 0.066 9
-0.767 -0.273 0.06 8
-0.152 -0.066 -0.76 8
0.403 0.006 -1.402 9
0.497 -0.046 -1.626 6
-0.043 -0.161 -1.358 10
-1.038 -0.241 -0.674 9
-2.069 -0.195 0.242 8
-1.862 -0.176 0.218 9
-2.476 0.047 1.063 8
-2.591 0.432 1.495 8
-2.389 0.886 1.28 9
-1.964 1.243 0.55 8
-1.432 1.493 -0.346 9
-0.948 1.609 -1.206 8
-0.853 1.448 -1.085 8
-0.572 1.338 -1.583 7
-0.633 1.08 -1.498 10
-1.086 0.698 -1.037 9
-1.812 0.246 -0.471 8
-2.49 -0.098 0.098 8
-2.833 -0.195 0.584 9
-2.549 -0.176 0.525 8
-2.532 -0.068 0.79 9
-2.058 0.089 0.863 8
-1.077 0.211 0.842 8
0.0 0.27 0.776 9
0.703 0.229 0.714 8
0.633 0.206 0.643 7
0.789 0.073 0.595 10
0.417 -0.035 0.443 8
-0.159 -0.065 0.05 9
-0.555 0.008 -0.358 8
-0.6 0.207 -0.467 8
-0.354 0.419 -0.277 9
-0.143 0.604 0.251 8
-0.128 0.544 0.226 9
-0.224 0.741 1.129 8
-0.452 0.845 2.134 8
-0.508 0.779 2.993 9
-0.271 0.565 3.541 7
0.19 0.273 3.616 10
0.608 -0.077 3.067 8
0.547 -0.069 2.76 8
0.715 -0.391 1.743 9
0.678 -0.677 0.593 8
0.586 -0.975 -0.437 9
0.549 -1.195 -1.213 8
0.606 -1.292 -1.643 8
0.623 -1.282 -1.617 9
0.56 -1.154 -1.455 8
0.431 -1.095 -1.179 9
0.194 -0.998 -0.853 6
-0.036 -0.863 -0.36 10
-0.125 -0.69 0.17 9
0.019 -0.51 0.533 8
0.263 -0.332 0.699 9
0.237 -0.299 0.629 8
0.316 -0.138 0.606 8
0.135 0.007 0.489 9
-0.214 0.143 0.204 8
-0.663 0.252 -0.269 8
-1.124 0.32 -0.642 9
-1.011 0.354 -0.78 8
-0.91 0.318 -0.702 7
-1.628 0.337 -0.71 10
-1.402 0.36 -0.564 8
-0.835 0.352 -0.192 9
-0.111 0.3 0.283 8
0.507 0.249 0.743 9
0.456 0.224 0.669 8
0.816 0.179 1.033 8
0.977 0.115 1.234 9
0.995 0.033 1.212 8
0.852 -0.103 0.95 9
0.578 -0.315 0.544 8
0.52 -0.284 0.49 7
0.211 -0.457 -0.071 10
0.039 -0.52 -0.72 8
0.089 -0.443 -1.27 8
0.262 -0.244 -1.467 9
0.436 -0.066 -1.157 8
0.58 0.032 -0.425 9
0.718 0.116 0.406 8
0.646 0.104 0.365 8
0.753 0.182 0.999 9
0.739 0.155 1.267 8
0.542 0.283 1.316 9
0.212 0.539 1.195 6
-0.083 0.59 0.759 10
-0.266 0.586 0.282 9
-0.24 0.527 0.254 8
-0.289 0.534 -0.053 9
-0.318 0.565 -0.188 8
-0.429 0.615 -0.204 8
-0.405 0.584 -0.195 9
-0.191 0.556 -0.109 8
0.015 0.545 0.118 9
0.013 0.491 0.106 8
0.196 0.418 0.346 8
0.416 0.254 0.396 7
0.589 0.192 0.32 10
0.641 0.157 0.177 9
0.569 0.066 -0.064 8
0.446 0.013 -0.352 8
0.401 0.011 -0.316 9
0.303 -0.092 -0.66 8
0.223 -0.219 -0.927 9
0.151 -0.335 -0.944 8
0.154 -0.523 -0.745 8
0.291 -0.708 -0.473 9
0.453 -0.757 -0.229 8
0.408 -0.681 -0.206 7
0.463 -0.656 -0.077 10
0.405 -0.522 -0.136 8
0.246 -0.375 -0.403 9
0.097 -0.275 -0.696 8
0.042 -0.174 -0.841 8
0.027 -0.111 -0.957 9
0.024 -0.099 -0.862 8
0.082 -0.05 -1.036 9
0.178 0.0 -1.251 8
0.227 0.04 -1.379 8
0.306 0.058 -1.311 9
0.275 0.052 -1.18 6
0.573 0.017 -0.598 11
0.516 0.015 -0.538 8
0.616 -0.041 -0.237 8
0.781 -0.099 -0.122 9
0.885 -0.112 -0.197 8
0.843 -0.139 -0.464 9
0.814 -0.112 -0.708 8
0.848 -0.044 -0.898 8
0.763 -0.039 -0.808 9
0.818 0.011 -0.962 8
0.89 0.072 -0.938 8
0.929 0.075 -0.751 7
0.957 0.0 -0.391 10
0.955 -0.126 0.01 9
0.86 -0.285 0.241 8
0.774 -0.257 0.217 8
0.598 -0.412 0.241 9
0.428 -0.568 0.052 8
0.115 -0.762 -0.229 9
-0.192 -0.944 -0.456 8
-0.43 -1.093 -0.693 8
-0.387 -0.984 -0.623 9
-0.623 -1.118 -0.65 8
-0.794 -1.082 -0.291 7
-0.828 -0.816 0.215 10
-0.629 -0.475 0.66 8
-0.267 -0.114 0.871 9
0.093 0.249 0.828 8
0.084 0.224 0.745 9
0.347 0.505 0.608 8
0.469 0.604 0.411 8
0.411 0.446 0.219 9
0.101 0.13 0.165 8
-0.425 -0.111 0.244 8
-0.867 -0.165 0.436 9
-0.78 -0.149 0.392 7
-1.039 -0.148 0.631 10
-1.066 -0.016 0.882 8
-0.811 0.414 1.077 8
-0.363 0.824 1.044 9
0.077 1.01 0.781 8
0.323 1.042 0.433 9
0.29 0.938 0.389 8
0.35 0.975 0.179 8
0.454 1.044 0.231 9
0.768 1.033 0.436 8
1.011 1.019 0.471 9
0.982 0.992 0.386 6
0.785 0.824 0.485 10
0.706 0.741 0.436 9
0.563 0.52 0.699 8
0.56 0.398 0.891 9
0.694 0.362 0.969 8
0.859 0.533 1.075 8
1.039 0.7 1.088 9
1.171 0.692 0.887 8
1.054 0.623 0.799 9
0.983 0.645 0.486 8
0.785 0.615 -0.003 8
0.596 0.468 -0.542 7
0.416 0.278 -0.782 10
0.217 0.105 -0.62 9
0.024 -0.073 -0.228 8
0.021 -0.066 -0.205 8
-0.105 -0.252 0.198 9
-0.137 -0.426 0.49 8
-0.071 -0.554 0.526 8
0.03 -0.61 0.394 9
0.079 -0.614 0.298 8
0.071 -0.552 0.22 9
0.076 -0.497 0.198 8
0.066 -0.465 0.081 7
0.013 -0.386 -0.113 10
-0.066 -0.301 -0.348 8
-0.06 -0.206 -0.57 9
0.0 -0.081 -0.755 8
0.0 -0.073 -0.679 8
0.054 0.054 -0.776 9
0.09 0.174 -0.789 8
0.181 0.294 -0.688 9
0.415 0.383 -0.454 8
0.702 0.456 -0.174 8
0.966 0.486 -0.081 9
0.869 0.437 -0.073 6
0.917 0.416 -0.14 11
0.704 0.366 -0.166 8
0.468 0.319 -0.144 8
0.319 0.279 -0.195 9
0.271 0.244 -0.328 8
0.271 0.233 -0.5 8
0.243 0.209 -0.45 9
0.271 0.188 -0.787 8
0.386 0.153 -1.086 9
0.567 0.095 -1.098 8
0.646 0.027 -0.878 8
0.508 -0.06 -0.592 7
0.315 -0.068 -0.297 10
0.283 -0.061 -0.267 9
0.195 -0.014 -0.064 8
0.257 -0.002 -0.065 8
0.398 0.02 -0.315 9
0.397 0.044 -0.717 8
0.215 0.084 -1.073 9
0.106 -0.006 -1.227 8
0.096 -0.005 -1.104 8
0.1 -0.172 -1.04 9
0.016 -0.352 -0.83 8
-0.197 -0.603 -0.531 7
-0.561 -0.811 -0.147 10
-0.927 -0.977 0.225 8
-1.266 -1.132 0.48 9
-1.14 -1.018 0.432 8
-1.533 -1.14 0.687 8
-1.927 -1.179 0.882 9
-2.212 -1.205 0.839 8
-2.303 -1.253 0.628 9
-2.303 -1.221 0.331 8
-2.255 -1.064 -0.097 8
-2.029 -0.958 -0.087 9
-1.879 -0.77 -0.417 7
-1.675 -0.628 -0.301 10
-1.654 -0.546 0.267 8
-1.97 -0.501 1.092 8
-2.142 -0.456 1.715 9
-1.927 -0.41 1.543 8
-1.255 -0.386 1.389 9
-0.361 -0.223 1.858 8
-0.403 0.016 1.896 8
-1.359 0.088 1.714 9
-2.527 0.073 1.302 8
-3.224 0.006 1.051 9
-2.902 0.005 0.946 6
-3.088 -0.328 0.765 10
-3.047 -0.571 0.626 9
-2.897 -0.5 0.615 8
-2.568 -0.422 0.577 9
-1.925 -0.319 0.611 8
-1.155 -0.342 0.729 8
-1.04 -0.308 0.656 9
-0.625 -0.374 0.918 8
-0.63 -0.303 1.214 8
-0.573 -0.445 1.291 9
-0.284 -0.716 1.149 8
-0.056 -0.805 0.97 7
0.015 -0.751 0.747 10
0.014 -0.675 0.672 8
-0.098 -0.457 0.358 9
-0.421 -0.15 0.117 8
-0.644 -0.068 0.0 9
-0.711 -0.247 -0.09 8
-0.733 -0.369 -0.189 8
-0.533 -0.407 -0.283 9
-0.48 -0.367 -0.255 8
0.3 -0.41 -0.239 9
1.283 -0.266 -0.168 8
1.577 0.092 -0.107 7
1.131 0.444 0.054 10
0.506 0.699 0.219 8
0.116 0.888 0.348 9
0.105 0.799 0.313 8
0.018 0.959 0.391 8
0.142 1.001 0.322 9
0.447 0.929 0.144 8
1.002 0.885 0.009 9
1.647 0.853 -0.041 8
2.227 0.925 -0.084 8
2.004 0.833 -0.075 9
2.329 1.057 -0.212 6
2.194 1.278 -0.482 10
1.757 1.366 -0.687 9
1.233 1.324 -0.584 8
0.707 1.245 -0.271 9
0.3 1.163 0.103 8
0.27 1.046 0.093 8
0.117 0.969 0.506 9
0.227 0.852 0.823 8
0.498 0.686 0.943 9
0.761 0.501 0.905 8
0.882 0.256 0.774 8
0.794 0.23 0.697 7
0.704 -0.108 0.602 10
0.497 -0.515 0.573 9
0.314 -0.856 0.565 8
0.221 -1.027 0.562 8
0.302 -1.089 0.508 9
0.603 -1.106 0.389 8
0.992 -1.166 0.284 9
0.892 -1.049 0.256 8
1.294 -1.152 0.255 8
1.559 -1.196 0.281 9
1.412 -1.142 0.048 8
0.786 -0.93 -0.482 7
0.038 -0.63 -1.039 10
0.034 -0.567 -1.362 8
-0.47 -0.51 -1.226 9
-0.691 -0.219 -1.267 8
-0.656 -0.314 -1.083 8
-0.197 -0.626 -0.707 9
0.429 -0.88 -0.36 8
0.685 -0.938 -0.17 9
0.617 -0.844 -0.153 8
0.4 -0.83 -0.043 8
-0.029 -0.738 -0.056 9
-0.281 -0.582 -0.225 7
-0.142 -0.398 -0.272 10
0.171 -0.038 -0.133 8
0.123 0.271 -0.055 8
0.11 0.243 -0.049 9
-0.247 0.053 -0.007 8
-0.828 -0.319 0.048 9
-1.534 -0.503 0.188 8
-1.994 -0.557 0.391 8
-1.96 -0.536 0.827 9
-1.271 -0.278 1.444 8
-1.144 -0.25 1.3 9
-0.152 0.164 1.654 6
0.701 0.449 1.72 10
1.016 0.593 1.724 9
0.705 0.603 1.72 8
0.306 0.493 1.689 8
0.16 0.223 1.741 9
0.144 0.2 1.567 8
0.146 -0.126 1.703 9
0.521 0.045 1.944 8
1.44 0.351 2.101 8
2.389 0.353 1.878 9
2.853 0.37 1.617 8
2.567 0.333 1.455 7
2.589 0.335 1.275 10
2.326 0.312 0.849 8
1.874 0.257 0.271 9
1.339 0.133 -0.231 8
0.824 -0.03 -0.68 9
0.489 -0.124 -0.98 8
0.294 -0.11 -0.94 8
0.265 -0.099 -0.846 9
0.163 -0.134 -1.33 8
0.037 -0.015 -1.937 9
-0.246 0.318 -1.604 8
-0.573 0.515 -0.987 7
-0.767 0.455 -0.838 10
-0.86 0.241 -1.176 8
-0.774 0.217 -1.059 9
-0.961 0.049 -1.288 8
-1.262 -0.043 -0.971 8
-1.611 -0.03 -0.193 9
-1.873 0.088 0.486 8
-1.951 0.209 0.743 9
-1.791 0.235 0.717 8
-1.612 0.211 0.645 8
-1.303 0.14 0.511 9
-1.185 0.068 0.428 6
-1.376 0.029 0.563 10
-1.613 0.0 1.063 9
-1.678 -0.048 1.906 8
-1.51 -0.044 1.715 9
-1.359 -0.034 2.672 8
-0.935 -0.034 3.275 8
-0.393 -0.124 3.243 9
-0.042 -0.138 2.787 8
-0.043 -0.09 2.308 9
-0.237 -0.136 2.062 8
-0.213 -0.122 1.856 8
-0.361 -0.376 1.743 7
-0.414 -0.693 1.775 10
-0.411 -0.837 1.906 9
-0.393 -0.829 1.868 8
-0.401 -0.673 1.624 8
-0.414 -0.372 1.191 9
-0.372 -0.335 1.072 8
-0.325 -0.132 0.512 9
-0.226 -0.132 -0.02 8
-0.185 -0.214 -0.374 8
-0.276 -0.272 -0.58 9
-0.338 -0.344 -0.729 8
-0.304 -0.309 -0.656 7
-0.224 -0.444 -0.803 10
-0.128 -0.599 -0.934 8
-0.15 -0.701 -0.968 9
-0.319 -0.718 -0.819 8
-0.509 -0.707 -0.655 8
-0.589 -0.675 -0.582 9
-0.523 -0.567 -0.593 8
-0.471 -0.51 -0.533 9
-0.265 -0.442 -0.628 8
0.003 -0.462 -0.78 8
0.161 -0.368 -0.979 9
0.155 -0.177 -1.108 6
0.095 -0.109 -1.14 11
0.081 -0.209 -1.155 8
0.073 -0.188 -1.039 8
0.07 -0.403 -1.125 9
-0.054 -0.714 -0.784 8
-0.441 -0.681 -0.078 9
-0.776 -0.53 0.293 8
-0.774 -0.591 0.37 8
-0.612 -0.596 0.236 9
-0.551 -0.536 0.212 8
-0.329 -0.529 -0.048 8
-0.19 -0.505 -0.303 7
-0.219 -0.476 -0.562 10
-0.37 -0.447 -0.746 9
-0.644 -0.42 -0.8 8
-0.58 -0.378 -0.72 8
-0.881 -0.408 -0.698 9
-0.899 -0.521 -0.639 8
-0.577 -0.886 -0.791 9
-0.489 -1.066 -0.979 8
-0.737 -0.676 -0.783 8
-0.939 -0.259 -0.545 9
-0.845 -0.233 -0.491 8
-0.782 -0.162 -0.531 7
-0.427 -0.318 -0.768 10
-0.101 -0.43 -1.002 8
-0.007 -0.446 -1.11 9
-0.116 -0.487 -1.157 8
-0.297 -0.563 -1.143 9
-0.267 -0.506 -1.029 8
-0.422 -0.536 -0.949 8
-0.41 -0.596 -0.786 9
-0.413 -0.783 -0.695 8
-0.547 -0.811 -0.695 8
-0.672 -0.605 -0.522 9
-0.605 -0.545 -0.47 7
-0.709 -0.365 -0.196 10
-0.729 -0.248 -0.187 8
-0.675 -0.172 -0.361 9
-0.625 -0.127 -0.441 8
-0.516 -0.065 -0.658 8
-0.329 -0.012 -0.973 9
-0.134 0.009 -1.102 8
-0.121 0.008 -0.992 8
0.035 0.025 -1.032 9
0.166 0.021 -1.024 8
0.255 0.015 -0.96 9
0.332 0.057 -0.884 6
0.335 0.049 -0.818 10
0.199 -0.036 -0.763 9
0.179 -0.032 -0.687 8
0.022 -0.089 -0.616 9
-0.159 -0.109 -0.516 8
-0.366 -0.111 -0.392 8
-0.586 -0.092 -0.159 9
-0.705 0.03 0.14 8
-0.485 0.154 0.29 9
-0.436 0.138 0.261 8
0.024 0.222 0.182 8
0.502 0.367 0.006 7
0.882 0.507 -0.193 10
1.029 0.585 -0.415 8
0.893 0.616 -0.578 9
0.803 0.554 -0.583 8
0.463 0.499 -0.525 9
0.107 0.539 -0.431 8
-0.112 0.521 -0.375 8
-0.192 0.502 -0.313 9
-0.207 0.488 -0.238 8
-0.194 0.56 -0.224 9
-0.175 0.504 -0.202 8
-0.114 0.588 -0.172 7
-0.071 0.601 -0.065 10
-0.113 0.601 0.183 8
-0.332 0.603 0.516 9
-0.662 0.579 0.783 8
-0.872 0.52 0.871 8
-0.784 0.468 0.784 9
-0.82 0.446 0.682 8
-0.56 0.436 0.562 9
-0.159 0.446 0.518 8
-0.012 0.522 0.514 8
-0.076 0.588 0.527 9
-0.069 0.53 0.474 6
-0.095 0.352 0.473 11
-0.436 0.209 0.705 8
-1.299 0.508 0.988 8
-1.854 0.686 0.892 9
-1.7 0.491 0.56 8
-1.166 0.343 0.284 8
-0.62 0.318 0.189 9
-0.558 0.286 0.17 8
-0.243 0.281 0.244 9
-0.117 0.283 0.463 8
-0.05 0.308 0.685 8
0.062 0.279 0.679 7
0.0 0.305 0.312 10
-0.294 0.576 -0.11 9
-0.264 0.518 -0.099 8
-0.482 0.795 -0.265 8
-0.455 0.771 -0.253 9
-0.244 0.554 -0.205 8
-0.034 0.333 -0.096 9
# end
#Thu Feb 26 20:26:31 GMT+08:00 20157
