# Supplementary material for: Abnormal Gait Behavior Detection for Elderly Based on Enhanced Wigner-Ville Analysis and Cloud Incremental SVM Learning
Source: Hindawi journal article supplement (doi:10.1155/2016/5869238), 2016-01-01
Supplement: f1 [file 5869238.f1.zip › Supplementary Materials/Original Data/Normal walking/original__2.txt]

# Accelerometer Values
# filename:  original__2.txt
# Saving start time: Thu Feb 26 20:16:56 GMT+08:00 2015

# sensor resolution: 0.0095825195m/s^2
#Sensorvendor: KIONIX, name: KX023 Accelerometer, type: 1,version : 1, range 39.240005

# X value, Y value, Z value, time diff in ms
-0.129 0.007 -0.329 8
-0.135 0.011 -0.239 9
-0.113 0.017 -0.092 8
-0.102 0.015 -0.083 8
-0.06 0.006 0.079 9
0.01 -0.023 0.189 7
0.086 -0.06 0.213 10
0.13 -0.088 0.13 8
0.123 -0.09 -0.026 8
0.075 -0.09 -0.156 9
0.068 -0.081 -0.14 8
-0.009 -0.068 -0.187 9
-0.126 -0.024 -0.172 8
-0.217 0.014 -0.154 8
-0.23 0.031 -0.152 9
-0.182 0.03 -0.146 8
-0.13 0.028 -0.14 8
-0.117 0.025 -0.126 7
-0.076 0.024 -0.116 10
-0.035 0.018 -0.096 9
-0.011 0.004 -0.077 8
-0.011 -0.001 -0.054 8
-0.016 0.014 -0.036 9
-0.021 0.025 -0.018 8
-0.019 0.023 -0.016 9
-0.029 0.021 0.02 8
-0.048 0.021 0.039 8
-0.085 0.02 0.0 9
-0.124 0.015 -0.063 8
-0.112 0.013 -0.057 7
-0.148 0.001 -0.131 10
-0.187 0.001 -0.118 8
-0.215 -0.047 -0.132 9
-0.24 -0.073 -0.146 8
-0.271 -0.07 -0.148 9
-0.282 -0.048 -0.166 8
-0.259 -0.025 -0.207 8
-0.233 -0.022 -0.186 9
-0.177 -0.011 -0.221 8
-0.106 -0.012 -0.23 8
-0.074 -0.019 -0.235 9
-0.108 -0.018 -0.253 7
-0.201 -0.008 -0.263 10
-0.312 0.0 -0.233 8
-0.281 0.0 -0.209 9
-0.371 0.013 -0.163 8
-0.35 0.029 -0.16 8
-0.218 0.063 -0.211 9
-0.079 0.135 -0.276 8
0.039 0.214 -0.247 8
0.15 0.256 -0.087 9
0.135 0.23 -0.078 8
0.243 0.225 0.08 9
0.337 0.174 0.158 6
0.404 0.111 0.158 10
0.429 0.059 0.101 9
0.4 0.023 0.069 8
0.314 0.036 0.096 9
0.283 0.032 0.086 8
0.15 0.078 0.143 8
0.024 0.106 0.184 9
-0.019 0.097 0.176 8
0.005 0.05 0.138 9
0.044 0.0 0.09 8
0.043 -0.026 0.052 8
0.039 -0.023 0.047 7
-0.007 -0.033 0.036 10
-0.052 -0.04 0.039 9
-0.086 -0.048 0.035 8
-0.101 -0.051 0.03 8
-0.102 -0.028 0.037 9
-0.092 -0.026 0.033 8
-0.094 0.009 0.043 8
-0.078 0.037 0.034 9
-0.037 0.069 0.031 8
0.012 0.099 0.044 9
0.056 0.11 0.07 8
0.05 0.099 0.063 7
0.07 0.104 0.097 10
0.076 0.126 0.123 8
0.098 0.14 0.109 9
0.128 0.15 0.07 8
0.137 0.181 0.051 8
0.116 0.23 0.047 9
0.088 0.278 0.041 8
0.079 0.25 0.037 9
0.068 0.284 0.041 8
0.061 0.302 0.048 8
0.039 0.322 0.055 9
-0.006 0.343 0.083 6
-0.064 0.347 0.15 11
-0.128 0.335 0.218 8
-0.116 0.302 0.196 8
-0.173 0.288 0.201 9
-0.207 0.29 0.175 8
-0.222 0.298 0.152 9
-0.187 0.288 0.126 8
-0.127 0.266 0.159 8
-0.082 0.242 0.29 9
-0.074 0.218 0.261 8
-0.013 0.189 0.418 8
0.074 0.143 0.519 7
0.156 0.061 0.564 10
0.209 -0.061 0.606 9
0.244 -0.228 0.696 8
0.22 -0.205 0.795 8
0.259 -0.185 0.715 9
0.284 -0.538 0.744 8
0.28 -0.582 0.673 9
0.258 -0.573 0.525 8
0.246 -0.534 0.349 8
0.298 -0.486 0.213 9
0.268 -0.438 0.191 8
0.407 -0.419 0.119 7
0.597 -0.428 0.081 10
0.721 -0.44 0.055 8
0.726 -0.442 0.04 9
0.658 -0.462 0.032 8
0.561 -0.523 0.025 8
0.505 -0.471 0.023 9
0.386 -0.554 0.017 8
0.241 -0.602 0.01 9
0.121 -0.593 -0.036 8
0.042 -0.56 -0.169 8
-0.017 -0.52 -0.377 9
-0.015 -0.468 -0.339 7
-0.112 -0.416 -0.539 10
-0.25 -0.338 -0.649 8
-0.387 -0.25 -0.67 8
-0.5 -0.179 -0.631 9
-0.577 -0.151 -0.527 8
-0.574 -0.168 -0.402 9
-0.463 -0.214 -0.361 8
-0.417 -0.192 -0.325 8
-0.245 -0.269 -0.375 9
-0.049 -0.35 -0.471 8
0.122 -0.364 -0.579 9
0.232 -0.378 -0.565 6
0.267 -0.414 -0.477 10
0.24 -0.372 -0.43 9
0.18 -0.35 -0.387 8
0.079 -0.297 -0.401 9
0.017 -0.25 -0.361 8
0.023 -0.216 -0.396 8
0.084 -0.186 -0.473 9
0.165 -0.132 -0.493 8
0.149 -0.118 -0.443 9
0.198 -0.083 -0.368 8
0.193 -0.052 -0.237 8
0.166 0.031 -0.14 7
0.144 0.105 -0.088 10
0.114 0.183 -0.04 8
0.055 0.32 0.015 9
0.05 0.288 0.013 8
-0.003 0.436 0.055 9
-0.019 0.531 0.08 8
-0.02 0.565 0.097 8
-0.024 0.584 0.081 9
-0.039 0.619 0.038 8
-0.065 0.666 0.006 9
-0.059 0.6 0.005 8
-0.091 0.659 0.011 7
-0.127 0.706 0.063 10
-0.176 0.739 0.15 8
-0.235 0.773 0.258 9
-0.289 0.812 0.392 8
-0.317 0.821 0.516 8
-0.286 0.739 0.464 9
-0.276 0.717 0.55 8
-0.227 0.672 0.603 9
-0.155 0.619 0.601 8
-0.062 0.564 0.529 8
0.045 0.514 0.437 9
0.04 0.463 0.393 6
0.105 0.422 0.353 11
0.089 0.383 0.396 8
0.027 0.343 0.47 8
-0.037 0.298 0.585 9
-0.114 0.231 0.76 8
-0.232 0.114 0.902 8
-0.209 0.102 0.812 9
-0.359 -0.042 0.861 8
-0.507 -0.209 0.804 9
-0.595 -0.389 0.715 8
-0.565 -0.517 0.641 8
-0.413 -0.587 0.577 7
-0.201 -0.604 0.486 10
-0.181 -0.543 0.437 9
0.01 -0.558 0.272 8
0.15 -0.613 0.08 8
0.206 -0.716 0.001 9
0.17 -0.803 0.025 8
0.066 -0.805 0.019 9
-0.082 -0.753 -0.072 8
-0.074 -0.678 -0.065 8
-0.209 -0.625 -0.177 9
-0.292 -0.567 -0.277 8
-0.308 -0.503 -0.345 7
-0.24 -0.452 -0.322 10
-0.121 -0.407 -0.243 8
-0.109 -0.366 -0.219 9
0.011 -0.336 -0.197 8
0.13 -0.346 -0.114 8
0.239 -0.392 -0.113 9
0.304 -0.44 -0.136 8
0.291 -0.469 -0.142 9
0.225 -0.477 -0.155 8
0.202 -0.429 -0.139 8
0.12 -0.424 -0.259 9
0.026 -0.398 -0.487 7
-0.048 -0.369 -0.716 10
-0.091 -0.336 -0.912 8
-0.115 -0.282 -1.052 8
-0.117 -0.214 -1.103 9
-0.106 -0.192 -0.993 8
-0.058 -0.131 -0.995 9
0.028 -0.092 -0.924 8
0.098 -0.069 -0.736 8
0.123 -0.032 -0.476 9
0.131 0.004 -0.251 8
0.146 0.002 -0.089 9
0.132 0.002 -0.08 6
0.142 0.0 0.039 10
0.141 0.046 0.105 9
0.12 0.124 0.122 8
0.079 0.234 0.121 8
0.008 0.393 0.118 9
0.007 0.354 0.106 8
-0.103 0.509 0.095 9
-0.207 0.591 0.081 8
-0.235 0.614 0.026 8
-0.178 0.602 -0.04 9
-0.095 0.583 -0.078 8
-0.086 0.525 -0.07 7
-0.053 0.527 -0.058 10
-0.085 0.568 0.012 8
-0.119 0.619 0.111 9
-0.096 0.643 0.221 8
-0.032 0.663 0.334 9
0.016 0.693 0.439 8
0.03 0.726 0.537 8
0.027 0.653 0.484 9
0.014 0.674 0.553 8
-0.032 0.661 0.629 9
-0.117 0.638 0.734 8
-0.19 0.609 0.779 7
-0.203 0.572 0.67 10
-0.125 0.532 0.427 8
-0.113 0.478 0.384 9
0.015 0.445 0.018 8
0.164 0.413 -0.413 8
0.322 0.435 -0.72 9
0.501 0.458 -0.921 8
0.733 0.399 -1.026 8
0.954 0.307 -0.889 9
0.859 0.276 -0.8 8
0.995 0.173 -0.399 9
0.962 0.053 0.236 6
0.784 -0.118 1.147 10
0.504 -0.379 2.155 9
0.225 -0.713 2.842 8
0.203 -0.641 2.558 9
0.081 -0.972 2.707 8
0.127 -1.199 2.332 8
0.255 -1.305 1.564 9
0.319 -1.283 0.603 8
0.219 -1.164 -0.212 9
-0.026 -0.972 -0.744 8
-0.023 -0.875 -0.67 8
-0.302 -0.629 -0.916 7
-0.464 -0.436 -0.865 10
-0.468 -0.408 -0.685 9
-0.387 -0.448 -0.534 8
-0.271 -0.458 -0.414 8
-0.159 -0.45 -0.312 9
-0.143 -0.405 -0.281 8
-0.059 -0.395 -0.25 8
0.007 -0.38 -0.266 9
0.032 -0.363 -0.308 8
-0.001 -0.346 -0.434 9
-0.072 -0.314 -0.628 8
-0.064 -0.282 -0.566 7
-0.152 -0.223 -0.678 10
-0.249 -0.138 -0.577 8
-0.35 -0.041 -0.358 9
-0.398 0.02 -0.158 8
-0.361 0.032 -0.048 8
-0.252 0.008 -0.051 9
-0.226 0.007 -0.046 8
-0.047 -0.052 -0.041 9
0.142 -0.12 -0.27 8
0.256 -0.152 -0.421 8
0.284 -0.136 -0.551 9
0.261 -0.123 -0.628 6
0.209 -0.08 -0.645 11
0.188 -0.072 -0.581 8
0.128 -0.018 -0.573 8
0.112 0.001 -0.524 9
0.135 0.021 -0.441 8
0.164 0.055 -0.356 9
0.196 0.079 -0.234 8
0.22 0.078 -0.112 8
0.198 0.07 -0.101 9
0.196 0.09 -0.047 8
0.122 0.148 -0.04 8
0.006 0.219 -0.096 7
-0.075 0.274 -0.203 10
-0.087 0.312 -0.343 9
-0.057 0.32 -0.514 8
-0.051 0.288 -0.463 8
-0.036 0.277 -0.588 9
-0.049 0.28 -0.597 8
-0.086 0.3 -0.52 9
-0.081 0.3 -0.349 8
-0.033 0.283 -0.156 8
0.004 0.311 -0.025 9
0.003 0.28 -0.023 8
0.057 0.318 0.057 7
0.105 0.325 0.083 10
0.108 0.345 0.127 8
0.069 0.365 0.265 9
-0.02 0.389 0.432 8
-0.018 0.35 0.388 9
-0.104 0.363 0.548 8
-0.112 0.304 0.673 8
-0.063 0.254 0.7 9
0.019 0.245 0.608 8
0.134 0.229 0.425 8
0.235 0.23 0.242 9
0.212 0.207 0.218 7
0.234 0.242 0.071 10
0.13 0.333 -0.08 8
-0.047 0.439 -0.153 9
-0.206 0.519 -0.088 8
-0.294 0.581 0.019 8
-0.27 0.579 0.092 9
-0.243 0.521 0.083 8
-0.153 0.429 0.094 8
-0.073 0.313 0.104 9
-0.045 0.233 0.151 8
-0.051 0.175 0.188 9
-0.069 0.095 0.182 6
-0.106 -0.026 0.188 10
-0.095 -0.023 0.169 9
-0.159 -0.137 0.258 8
-0.24 -0.226 0.419 9
-0.314 -0.302 0.634 8
-0.369 -0.382 0.852 8
-0.385 -0.484 0.998 9
-0.341 -0.584 0.939 8
-0.307 -0.525 0.845 9
-0.23 -0.602 0.563 8
-0.181 -0.646 0.253 8
-0.188 -0.661 0.059 7
-0.242 -0.65 -0.028 10
-0.314 -0.65 -0.034 8
-0.283 -0.585 -0.031 9
-0.326 -0.632 0.013 8
-0.293 -0.67 0.026 9
-0.201 -0.675 -0.015 8
-0.114 -0.654 -0.053 8
-0.06 -0.608 -0.071 9
-0.054 -0.535 -0.075 8
-0.048 -0.482 -0.067 9
-0.119 -0.382 -0.065 8
-0.237 -0.256 -0.054 7
-0.382 -0.119 -0.027 10
-0.484 0.062 -0.017 8
-0.424 0.265 -0.012 9
-0.229 0.358 0.021 8
-0.206 0.322 0.019 8
0.008 0.289 0.06 9
0.179 0.218 0.075 8
0.298 0.147 0.15 9
0.38 0.055 0.251 8
0.409 -0.058 0.261 8
0.366 -0.133 0.185 9
0.329 -0.12 0.166 6
0.23 -0.1 0.033 11
0.1 0.006 -0.075 8
-0.001 0.105 -0.138 8
-0.028 0.132 -0.205 9
0.014 0.095 -0.314 8
0.085 0.027 -0.416 8
0.076 0.024 -0.375 9
0.13 -0.064 -0.396 8
0.143 -0.141 -0.28 9
0.129 -0.178 -0.1 8
0.103 -0.192 0.051 8
0.092 -0.173 0.046 7
0.042 -0.152 0.17 10
-0.06 -0.069 0.254 9
-0.193 0.106 0.335 8
-0.297 0.305 0.47 8
-0.328 0.417 0.631 9
-0.304 0.43 0.744 8
-0.262 0.423 0.781 9
-0.236 0.38 0.703 8
-0.172 0.4 0.657 8
-0.071 0.423 0.524 9
0.05 0.415 0.409 8
0.138 0.378 0.401 7
0.169 0.341 0.462 10
0.169 0.315 0.592 8
0.152 0.284 0.533 9
0.156 0.254 0.596 8
0.175 0.22 0.472 9
0.198 0.198 0.237 8
0.2 0.173 -0.063 8
0.191 0.151 -0.36 9
0.2 0.141 -0.568 8
0.18 0.127 -0.511 8
0.212 0.115 -0.614 9
0.265 0.092 -0.666 7
0.332 0.066 -0.679 10
0.392 0.039 -0.657 8
0.459 0.007 -0.579 8
0.533 -0.079 -0.463 9
0.48 -0.071 -0.417 8
0.527 -0.211 -0.287 9
0.517 -0.372 -0.109 8
0.463 -0.528 0.057 8
0.434 -0.651 0.178 9
0.46 -0.741 0.257 8
0.414 -0.667 0.232 9
0.465 -0.722 0.216 6
0.471 -0.698 0.055 10
0.422 -0.561 -0.151 9
0.332 -0.351 -0.322 8
0.213 -0.133 -0.507 9
0.082 0.048 -0.663 8
0.074 0.043 -0.597 8
-0.024 0.15 -0.652 9
-0.052 0.12 -0.556 8
-0.049 0.007 -0.344 8
-0.062 -0.082 -0.143 9
-0.113 -0.133 -0.027 8
-0.102 -0.12 -0.024 7
-0.196 -0.111 0.0 10
-0.28 -0.063 -0.058 8
-0.338 0.004 -0.164 9
-0.372 0.093 -0.259 8
-0.355 0.158 -0.301 9
-0.279 0.192 -0.311 8
-0.153 0.204 -0.329 8
-0.137 0.184 -0.296 9
0.027 0.128 -0.312 8
0.227 0.033 -0.294 9
0.373 -0.02 -0.237 8
0.428 -0.035 -0.172 7
0.42 -0.039 -0.145 10
0.378 -0.035 -0.179 8
0.322 -0.032 -0.161 9
0.217 0.061 -0.155 8
0.095 0.071 -0.048 8
0.014 0.051 0.106 9
0.005 0.018 0.236 8
0.036 -0.002 0.3 9
0.032 -0.002 0.27 8
0.06 0.005 0.287 8
0.095 0.052 0.27 9
0.095 0.137 0.229 6
0.044 0.219 0.155 10
0.004 0.265 0.014 9
-0.032 0.294 -0.233 8
-0.029 0.265 -0.21 9
-0.067 0.293 -0.52 8
-0.112 0.288 -0.754 8
-0.26 0.291 -0.791 9
-0.486 0.407 -0.697 8
-0.662 0.543 -0.577 9
-0.691 0.546 -0.403 8
-0.622 0.491 -0.363 8
-0.5 0.391 -0.095 7
-0.272 0.254 0.216 10
0.002 0.126 0.435 9
0.22 0.012 0.522 8
0.295 -0.058 0.517 8
0.286 -0.093 0.388 9
0.257 -0.083 0.349 8
0.244 -0.154 0.137 9
0.164 -0.259 0.009 8
-0.023 -0.292 -0.008 8
-0.261 -0.195 -0.01 9
-0.453 -0.073 -0.036 8
-0.407 -0.066 -0.033 7
-0.486 -0.016 -0.091 10
-0.463 -0.001 -0.153 8
-0.404 0.026 -0.157 9
-0.341 0.068 -0.123 8
-0.259 0.088 -0.107 8
-0.158 0.06 -0.088 9
-0.142 0.054 -0.079 8
-0.057 0.0 -0.041 9
-0.007 -0.025 -0.035 8
0.025 -0.02 -0.088 8
0.045 -0.028 -0.122 9
0.029 -0.048 -0.08 7
-0.016 -0.031 -0.012 10
-0.014 -0.028 -0.01 8
-0.068 0.03 0.01 8
-0.114 0.074 -0.012 9
-0.127 0.096 -0.036 8
-0.117 0.111 -0.041 9
-0.111 0.115 0.017 8
-0.115 0.116 0.139 8
-0.104 0.105 0.125 9
-0.098 0.119 0.224 8
-0.06 0.136 0.268 9
0.017 0.115 0.291 6
0.128 0.069 0.291 10
0.22 0.033 0.248 9
0.24 0.007 0.181 8
0.216 0.006 0.163 8
0.154 -0.016 0.102 9
0.04 -0.02 0.034 8
-0.085 -0.001 -0.034 9
-0.186 0.02 -0.099 8
-0.221 0.028 -0.206 8
-0.185 0.009 -0.328 9
-0.166 0.008 -0.295 8
-0.1 -0.037 -0.379 7
-0.029 -0.083 -0.385 10
0.049 -0.123 -0.316 8
0.093 -0.147 -0.202 9
0.089 -0.14 -0.073 8
0.08 -0.096 0.011 9
0.046 -0.086 0.01 8
-0.025 -0.016 0.068 8
-0.088 0.036 0.133 9
-0.13 0.065 0.149 8
-0.159 0.078 0.092 9
-0.14 0.073 -0.007 8
-0.126 0.066 -0.007 7
-0.063 0.027 -0.114 10
0.005 -0.037 -0.183 8
0.052 -0.071 -0.213 9
0.054 -0.048 -0.191 8
0.026 0.0 -0.133 8
-0.009 0.043 -0.061 9
-0.008 0.039 -0.055 8
-0.067 0.078 0.019 8
-0.146 0.114 0.105 9
-0.186 0.132 0.219 8
-0.165 0.112 0.317 9
-0.112 0.071 0.363 6
-0.066 0.029 0.338 10
-0.06 0.026 0.304 9
-0.028 0.014 0.242 8
0.0 0.018 0.167 9
0.03 0.008 0.048 8
0.056 -0.002 -0.098 8
0.056 0.002 -0.178 9
0.022 0.016 -0.167 8
0.02 0.014 -0.15 9
-0.02 0.023 -0.105 8
-0.053 0.027 -0.044 8
-0.076 0.031 0.029 7
-0.064 0.027 0.105 10
-0.018 0.012 0.168 9
0.033 -0.008 0.214 8
0.029 -0.007 0.193 8
0.062 -0.021 0.206 9
0.069 -0.022 0.162 8
0.057 -0.016 0.091 8
0.04 -0.006 0.022 9
0.018 0.003 -0.028 8
0.017 0.002 -0.025 9
0.004 0.006 -0.059 8
0.01 0.002 -0.073 7
0.036 -0.012 -0.049 10
0.071 -0.029 -0.01 8
0.089 -0.029 0.031 9
0.073 -0.014 0.055 8
0.066 -0.013 0.049 8
0.033 0.008 0.01 9
0.003 0.035 -0.09 8
-0.013 0.053 -0.193 9
-0.023 0.05 -0.242 8
-0.024 0.028 -0.251 8
-0.016 0.0 -0.224 9
-0.014 0.0 -0.201 6
0.0 -0.028 -0.116 11
0.013 -0.045 -0.019 8
0.019 -0.03 0.062 8
0.01 -0.001 0.082 9
-0.018 0.011 0.017 8
-0.063 0.023 -0.035 9
-0.056 0.02 -0.032 8
-0.089 0.033 -0.044 8
-0.088 0.029 -0.058 9
-0.072 0.008 -0.066 8
-0.063 -0.011 -0.063 9
-0.048 -0.023 -0.057 6
-0.019 -0.036 -0.035 10
-0.017 -0.032 -0.031 9
0.017 -0.045 -0.037 8
0.048 -0.049 -0.095 8
0.067 -0.044 -0.132 9
0.064 -0.029 -0.102 8
0.045 -0.009 -0.137 9
0.031 -0.008 -0.21 8
0.028 -0.007 -0.189 8
0.0 -0.013 -0.129 9
-0.046 -0.003 -0.03 8
-0.071 0.009 0.009 7
-0.056 0.009 0.031 10
-0.027 0.013 0.086 8
-0.024 0.011 0.162 9
-0.003 0.01 0.146 8
0.007 0.066 0.207 9
0.008 0.101 0.28 8
0.018 0.104 0.354 8
0.04 0.085 0.372 9
0.058 0.055 0.34 8
0.052 0.05 0.306 9
0.06 0.014 0.265 8
0.053 -0.016 0.196 7
0.024 -0.025 0.077 10
# end
#Thu Feb 26 20:17:02 GMT+08:00 2015.
