# Supplementary material for: Abnormal Gait Behavior Detection for Elderly Based on Enhanced Wigner-Ville Analysis and Cloud Incremental SVM Learning
Source: Hindawi journal article supplement (doi:10.1155/2016/5869238), 2016-01-01
Supplement: f1 [file 5869238.f1.zip › Supplementary Materials/Original Data/Normal walking/original__3.txt]

# Accelerometer Values
# filename:  original__3.txt
# Saving start time: Thu Feb 26 20:17:06 GMT+08:00 2015

# sensor resolution: 0.0095825195m/s^2
#Sensorvendor: KIONIX, name: KX023 Accelerometer, type: 1,version : 1, range 39.240005

# X value, Y value, Z value, time diff in ms
-0.006 -0.012 -0.031 9
0.02 -0.027 -0.082 8
0.036 -0.032 -0.118 7
0.028 -0.023 -0.085 10
-0.001 -0.022 0.0 8
-0.001 -0.02 0.0 9
-0.044 -0.021 0.071 8
-0.097 0.0 0.099 9
-0.151 0.009 0.098 8
-0.208 -0.002 0.09 8
-0.267 -0.005 0.082 9
-0.315 0.008 0.062 8
-0.283 0.007 0.056 8
-0.284 0.027 -0.001 9
-0.208 0.032 -0.067 7
-0.106 0.012 -0.109 10
-0.037 -0.008 -0.143 8
-0.002 -0.035 -0.177 9
0.012 -0.081 -0.203 8
0.011 -0.073 -0.182 8
-0.005 -0.124 -0.188 9
-0.05 -0.154 -0.172 8
-0.105 -0.168 -0.142 8
-0.154 -0.173 -0.116 9
-0.173 -0.157 -0.109 8
-0.156 -0.119 -0.106 9
-0.14 -0.107 -0.096 6
-0.119 -0.065 -0.089 10
-0.094 -0.035 -0.067 9
-0.056 -0.015 -0.031 8
-0.023 0.015 0.031 9
-0.03 0.064 0.112 8
-0.064 0.091 0.172 8
-0.057 0.082 0.155 9
-0.078 0.077 0.158 8
-0.076 0.07 0.119 9
-0.095 0.078 0.076 8
-0.136 0.091 0.022 8
-0.123 0.082 0.02 7
-0.152 0.08 -0.152 10
-0.167 0.076 -0.136 9
-0.167 0.073 -0.226 8
-0.171 0.074 -0.302 8
-0.181 0.075 -0.377 9
-0.193 0.07 -0.398 8
-0.195 0.074 -0.326 8
-0.176 0.066 -0.294 9
-0.158 0.071 -0.237 8
-0.128 0.078 -0.221 9
-0.091 0.097 -0.221 8
-0.06 0.131 -0.255 7
-0.03 0.169 -0.3 10
0.003 0.219 -0.304 8
0.003 0.197 -0.274 9
0.061 0.227 -0.241 8
0.149 0.207 -0.184 8
0.243 0.161 -0.158 9
0.308 0.095 -0.146 8
0.325 0.029 -0.113 9
0.289 -0.022 -0.052 8
0.26 -0.02 -0.047 8
0.174 -0.051 0.0 9
0.051 -0.07 -0.03 6
-0.053 -0.086 -0.104 11
-0.114 -0.093 -0.155 8
-0.15 -0.085 -0.166 8
-0.168 -0.057 -0.159 9
-0.151 -0.051 -0.143 8
-0.17 -0.017 -0.135 8
-0.158 0.012 -0.11 9
-0.092 0.019 -0.077 8
0.004 0.01 -0.048 9
0.072 -0.002 0.022 8
0.099 -0.015 0.157 8
0.089 -0.013 0.142 7
0.081 -0.019 0.277 10
0.022 -0.006 0.346 9
-0.079 0.023 0.343 8
-0.185 0.059 0.295 8
-0.273 0.13 0.237 9
-0.245 0.117 0.197 8
-0.301 0.226 0.177 9
-0.264 0.307 0.18 8
-0.142 0.332 0.242 8
0.008 0.318 0.313 9
0.148 0.272 0.355 8
0.133 0.245 0.32 7
0.217 0.197 0.351 10
0.233 0.158 0.368 8
0.183 0.144 0.36 9
0.087 0.166 0.338 8
0.003 0.206 0.305 8
-0.036 0.238 0.269 9
-0.021 0.252 0.211 8
-0.019 0.226 0.19 9
0.049 0.229 0.094 8
0.131 0.242 0.029 8
0.183 0.258 0.039 9
0.228 0.251 0.056 7
0.243 0.265 0.07 10
0.224 0.272 0.103 8
0.202 0.245 0.093 8
0.207 0.169 0.125 9
0.234 0.016 0.155 8
0.265 -0.175 0.229 9
0.287 -0.345 0.393 8
0.293 -0.494 0.621 8
0.301 -0.694 0.822 9
0.271 -0.624 0.74 8
0.328 -0.853 0.842 9
0.434 -1.027 0.841 6
0.518 -1.104 0.703 10
0.508 -1.075 0.376 9
0.418 -0.965 0.003 8
0.292 -0.805 -0.228 9
0.263 -0.724 -0.205 8
0.123 -0.552 -0.356 8
0.028 -0.396 -0.444 9
0.021 -0.284 -0.398 8
0.106 -0.267 -0.287 9
0.282 -0.313 -0.152 8
0.254 -0.282 -0.137 8
0.427 -0.301 0.049 7
0.513 -0.273 0.242 10
0.496 -0.208 0.317 8
0.384 -0.126 0.234 9
0.225 -0.058 0.059 8
0.065 -0.016 -0.106 9
0.058 -0.014 -0.095 8
-0.088 0.009 -0.197 8
-0.22 0.004 -0.246 9
-0.329 -0.01 -0.241 8
-0.396 -0.023 -0.212 9
-0.424 -0.039 -0.182 8
-0.382 -0.035 -0.164 7
-0.368 -0.046 -0.142 10
-0.316 -0.058 -0.127 8
-0.243 -0.081 -0.128 9
-0.161 -0.106 -0.162 8
-0.084 -0.118 -0.228 8
-0.025 -0.108 -0.299 9
0.022 -0.09 -0.331 8
0.02 -0.081 -0.298 9
0.07 -0.084 -0.271 8
0.093 -0.08 -0.233 8
0.085 -0.037 -0.246 9
0.086 0.02 -0.303 6
0.098 0.075 -0.394 10
0.11 0.143 -0.465 9
0.099 0.128 -0.419 8
0.137 0.17 -0.431 9
0.196 0.159 -0.393 8
0.249 0.158 -0.329 8
0.258 0.192 -0.242 9
0.23 0.226 -0.177 8
0.184 0.27 -0.213 9
0.165 0.243 -0.192 8
0.095 0.33 -0.283 8
0.013 0.41 -0.34 7
-0.046 0.428 -0.356 10
-0.072 0.421 -0.339 9
-0.095 0.416 -0.269 8
-0.086 0.375 -0.242 8
-0.115 0.361 -0.157 9
-0.135 0.341 -0.083 8
-0.147 0.34 0.028 9
-0.164 0.37 0.204 8
-0.208 0.422 0.387 8
-0.262 0.502 0.501 9
-0.235 0.451 0.451 8
-0.258 0.519 0.515 7
-0.226 0.52 0.595 10
-0.156 0.465 0.708 8
-0.052 0.405 0.799 9
0.096 0.37 0.813 8
0.285 0.336 0.725 8
0.257 0.303 0.653 9
0.428 0.263 0.478 8
0.467 0.248 0.269 9
0.34 0.27 0.115 8
0.112 0.293 0.029 8
-0.123 0.279 -0.017 9
-0.11 0.251 -0.015 7
-0.32 0.195 -0.039 10
-0.516 0.108 -0.047 8
-0.685 0.002 -0.047 8
-0.769 -0.13 -0.039 9
-0.716 -0.265 -0.018 8
-0.558 -0.426 0.087 9
-0.356 -0.63 0.301 8
-0.32 -0.567 0.27 8
-0.124 -0.772 0.515 9
0.025 -0.927 0.693 8
0.111 -0.994 0.76 9
0.154 -0.988 0.717 6
0.176 -0.928 0.475 10
0.162 -0.83 0.094 9
0.145 -0.747 0.085 8
0.096 -0.646 -0.209 8
0.033 -0.526 -0.417 9
-0.049 -0.371 -0.619 8
-0.132 -0.242 -0.75 9
-0.206 -0.179 -0.752 8
-0.185 -0.161 -0.677 8
-0.245 -0.116 -0.599 9
-0.272 -0.083 -0.475 8
-0.281 -0.056 -0.304 7
-0.247 -0.027 -0.141 10
-0.151 0.0 -0.035 8
-0.044 0.017 0.05 9
-0.04 0.015 0.045 8
0.048 0.026 0.184 9
0.12 0.012 0.342 8
0.174 -0.019 0.407 8
0.214 -0.046 0.382 9
0.215 -0.07 0.278 8
0.164 -0.103 0.113 9
0.147 -0.092 0.102 8
0.052 -0.117 -0.032 7
-0.088 -0.103 -0.162 10
-0.227 -0.061 -0.334 8
-0.306 -0.015 -0.524 9
-0.303 0.018 -0.665 8
-0.214 0.028 -0.653 8
-0.193 0.025 -0.588 9
-0.048 -0.005 -0.436 8
0.091 -0.046 -0.264 8
0.187 -0.063 -0.164 9
0.22 -0.046 -0.119 8
0.181 0.001 -0.103 9
0.163 0.001 -0.093 6
0.082 0.061 -0.102 10
-0.021 0.147 -0.124 9
-0.123 0.243 -0.14 8
-0.185 0.324 -0.182 9
-0.194 0.402 -0.256 8
-0.154 0.46 -0.277 8
-0.089 0.483 -0.195 9
-0.08 0.435 -0.175 8
-0.012 0.428 -0.046 9
0.043 0.408 0.083 8
0.074 0.404 0.22 8
0.09 0.399 0.367 7
0.121 0.365 0.533 10
0.109 0.33 0.657 9
0.098 0.297 0.592 8
0.203 0.306 0.625 8
0.224 0.337 0.603 9
0.219 0.351 0.57 8
0.185 0.354 0.53 9
0.126 0.36 0.424 8
0.114 0.324 0.382 8
0.051 0.352 0.192 9
0.014 0.374 -0.014 8
0.026 0.367 -0.264 7
0.059 0.363 -0.555 10
0.104 0.365 -0.754 8
0.18 0.355 -0.812 9
0.162 0.32 -0.731 8
0.268 0.238 -0.67 8
0.428 0.067 -0.499 9
0.584 -0.086 -0.229 8
0.654 -0.196 0.105 9
0.671 -0.343 0.484 8
0.658 -0.529 0.825 8
0.592 -0.476 0.743 9
0.541 -0.617 0.927 6
0.377 -0.661 0.955 11
0.108 -0.631 0.915 8
-0.169 -0.563 0.814 8
-0.406 -0.466 0.54 9
-0.55 -0.364 0.15 8
-0.495 -0.328 0.135 9
-0.507 -0.27 -0.227 8
-0.413 -0.278 -0.609 8
-0.263 -0.336 -0.906 9
-0.065 -0.422 -0.985 8
0.126 -0.484 -0.886 8
0.113 -0.436 -0.797 7
0.256 -0.436 -0.546 10
0.326 -0.392 -0.228 9
0.345 -0.351 0.031 8
0.314 -0.309 0.234 8
0.205 -0.24 0.396 9
0.041 -0.17 0.481 8
-0.13 -0.106 0.451 9
-0.117 -0.096 0.406 8
-0.255 -0.031 0.262 8
-0.347 0.029 0.099 9
-0.389 0.062 -0.034 8
-0.364 0.048 -0.219 7
-0.281 -0.001 -0.47 10
-0.253 -0.001 -0.684 8
-0.15 -0.001 -0.616 9
-0.064 -0.079 -0.733 8
-0.012 -0.08 -0.751 9
0.021 -0.073 -0.7 8
0.075 -0.063 -0.619 8
0.14 -0.062 -0.532 9
0.126 -0.056 -0.479 8
0.146 -0.039 -0.392 8
0.106 -0.005 -0.267 9
0.073 0.012 -0.13 7
0.081 0.023 -0.05 10
0.087 0.04 -0.004 8
0.058 0.054 0.05 8
0.053 0.049 0.045 9
0.014 0.086 0.079 8
-0.024 0.156 0.066 9
-0.044 0.215 0.014 8
-0.005 0.244 -0.067 8
0.049 0.28 -0.159 9
0.06 0.34 -0.228 8
0.054 0.306 -0.205 9
0.048 0.352 -0.236 6
0.049 0.362 -0.246 10
0.055 0.36 -0.238 9
0.038 0.355 -0.197 8
0.0 0.347 -0.083 9
-0.048 0.33 0.103 8
-0.043 0.297 0.093 8
-0.12 0.285 0.3 9
-0.209 0.292 0.462 8
-0.274 0.327 0.537 9
-0.308 0.383 0.548 8
-0.314 0.427 0.543 8
-0.283 0.385 0.489 7
-0.259 0.411 0.486 10
-0.199 0.412 0.471 9
-0.102 0.383 0.443 8
0.01 0.354 0.405 8
0.096 0.336 0.344 9
0.12 0.338 0.271 8
0.108 0.304 0.244 8
0.072 0.3 0.19 9
0.011 0.273 0.155 8
-0.057 0.247 0.102 9
-0.114 0.218 -0.05 8
-0.14 0.17 -0.298 7
-0.165 0.121 -0.52 10
-0.148 0.109 -0.468 8
-0.201 0.093 -0.604 9
-0.278 0.09 -0.634 8
-0.362 0.048 -0.477 8
-0.402 -0.05 -0.101 9
-0.376 -0.155 0.451 8
-0.295 -0.233 1.057 9
-0.266 -0.209 0.951 8
-0.131 -0.286 1.46 8
0.039 -0.404 1.769 9
0.231 -0.584 1.725 6
0.466 -0.769 1.328 11
0.664 -0.89 0.847 8
0.682 -0.91 0.422 8
0.614 -0.819 0.38 9
0.458 -0.775 0.028 8
0.218 -0.711 -0.23 8
-0.021 -0.623 -0.397 9
-0.232 -0.511 -0.52 8
-0.402 -0.411 -0.653 9
-0.523 -0.354 -0.735 8
-0.47 -0.318 -0.662 8
-0.514 -0.316 -0.689 7
-0.48 -0.32 -0.702 10
-0.425 -0.296 -0.684 9
-0.392 -0.236 -0.603 8
-0.364 -0.145 -0.453 8
-0.327 -0.13 -0.408 9
-0.25 -0.062 -0.234 8
-0.113 -0.028 -0.087 9
0.033 0.004 0.017 8
0.137 0.012 0.125 8
0.203 -0.028 0.223 9
0.25 -0.068 0.236 8
0.225 -0.061 0.212 7
0.238 -0.046 0.21 10
0.21 -0.017 0.189 8
0.162 -0.004 0.11 9
0.103 0.039 0.041 8
0.048 0.099 0.0 8
0.008 0.128 -0.039 9
0.008 0.115 -0.035 8
-0.021 0.129 -0.091 9
-0.026 0.143 -0.178 8
0.004 0.149 -0.301 8
0.039 0.139 -0.409 9
0.06 0.098 -0.43 7
0.058 0.048 -0.321 10
0.052 0.043 -0.289 8
0.019 0.024 -0.104 8
-0.04 0.019 0.046 9
-0.133 0.022 0.118 8
-0.233 0.073 0.129 9
-0.272 0.123 0.081 8
-0.237 0.116 -0.038 8
-0.213 0.104 -0.034 9
-0.133 0.077 -0.172 8
-0.075 0.087 -0.249 9
-0.086 0.127 -0.27 6
-0.152 0.198 -0.219 10
-0.215 0.29 -0.092 9
-0.238 0.338 0.025 8
-0.214 0.304 0.023 9
-0.187 0.322 0.086 8
-0.13 0.338 0.134 8
-0.089 0.35 0.175 9
-0.06 0.365 0.191 8
-0.018 0.391 0.241 8
-0.016 0.352 0.217 9
0.053 0.376 0.195 8
0.148 0.344 0.343 7
0.233 0.26 0.324 10
0.274 0.185 0.287 8
0.275 0.126 0.226 9
0.247 0.094 0.135 8
0.223 0.084 0.121 9
0.168 0.09 0.051 8
0.096 0.129 0.011 8
0.041 0.187 -0.014 9
0.026 0.265 -0.027 8
0.043 0.338 -0.024 9
0.077 0.393 -0.02 8
0.07 0.353 -0.018 7
0.137 0.397 -0.056 10
0.284 0.401 -0.209 8
0.502 0.338 -0.444 9
0.693 0.223 -0.595 8
0.757 0.095 -0.584 8
0.662 0.006 -0.448 9
0.596 0.006 -0.403 8
0.425 -0.072 -0.158 9
0.25 -0.212 0.164 8
0.097 -0.429 0.576 8
-0.016 -0.674 1.006 9
-0.1 -0.855 1.325 6
-0.139 -0.955 1.402 10
-0.125 -0.859 1.261 9
-0.121 -0.903 1.03 8
-0.097 -0.9 0.587 9
-0.1 -0.853 0.108 8
-0.151 -0.755 -0.232 8
-0.231 -0.628 -0.439 9
-0.333 -0.498 -0.577 8
-0.3 -0.448 -0.519 9
-0.394 -0.311 -0.637 8
-0.427 -0.179 -0.735 8
-0.344 -0.095 -0.78 7
-0.158 -0.081 -0.762 10
0.057 -0.082 -0.655 9
0.238 -0.049 -0.451 8
0.214 -0.044 -0.406 8
0.309 0.011 -0.158 9
0.311 0.083 0.03 8
0.222 0.179 0.145 9
0.093 0.306 0.233 8
-0.01 0.414 0.239 8
-0.009 0.373 0.215 9
-0.067 0.429 0.153 8
-0.097 0.439 0.096 7
-0.132 0.434 0.06 10
-0.168 0.406 0.05 8
-0.173 0.316 0.093 9
-0.159 0.172 0.213 8
-0.143 0.155 0.192 8
-0.133 0.034 0.314 9
-0.122 -0.006 0.335 8
-0.082 -0.036 0.226 9
-0.011 -0.084 0.071 8
0.049 -0.092 -0.057 8
0.063 -0.035 -0.186 9
0.056 -0.031 -0.167 7
0.038 0.06 -0.279 10
0.021 0.111 -0.305 8
0.023 0.081 -0.242 8
0.041 0.017 -0.146 9
0.059 -0.044 -0.063 8
0.088 -0.111 -0.006 9
0.079 -0.1 -0.005 8
0.138 -0.161 0.025 8
0.188 -0.176 0.04 9
0.193 -0.128 0.044 8
0.149 -0.004 0.033 9
0.092 0.151 -0.016 6
0.066 0.249 -0.118 10
0.06 0.224 -0.106 9
0.073 0.261 -0.176 8
0.098 0.25 -0.141 8
0.128 0.21 -0.046 9
0.165 0.137 0.034 8
0.183 0.078 0.088 9
0.182 0.08 0.104 8
0.163 0.072 0.093 8
0.181 0.095 0.074 9
0.199 0.125 0.046 8
0.198 0.159 -0.001 7
0.226 0.181 -0.173 10
0.316 0.173 -0.398 8
0.4 0.139 -0.495 9
0.36 0.125 -0.445 8
0.334 0.099 -0.43 9
0.225 0.095 -0.338 8
0.125 0.081 -0.219 8
0.072 0.017 -0.131 9
0.043 -0.059 -0.058 8
0.039 -0.053 -0.052 9
-0.006 -0.062 0.03 8
-0.067 -0.021 0.121 7
-0.15 0.012 0.2 10
-0.225 0.04 0.24 8
-0.242 0.061 0.243 9
-0.193 0.049 0.224 8
-0.174 0.044 0.201 8
-0.093 -0.002 0.132 9
-0.01 -0.071 -0.062 8
0.053 -0.158 -0.328 8
0.078 -0.214 -0.505 9
0.038 -0.194 -0.56 8
-0.074 -0.097 -0.549 9
-0.066 -0.087 -0.494 6
-0.189 0.031 -0.436 10
-0.26 0.11 -0.316 9
-0.263 0.13 -0.126 8
-0.172 0.055 0.1 9
-0.024 -0.054 0.285 8
0.072 -0.089 0.389 8
0.064 -0.08 0.35 9
0.097 -0.097 0.393 8
0.12 -0.12 0.393 9
0.123 -0.07 0.361 8
0.089 0.007 0.31 8
0.05 0.064 0.264 7
0.005 0.106 0.227 10
0.005 0.095 0.204 9
-0.057 0.121 0.168 8
-0.122 0.126 0.138 8
-0.164 0.113 0.11 9
-0.183 0.101 0.081 8
-0.194 0.094 0.043 8
-0.185 0.082 0.024 9
-0.167 0.074 0.021 8
-0.152 0.06 0.027 9
-0.138 0.054 -0.001 8
-0.103 0.04 -0.07 7
-0.051 0.011 -0.139 10
-0.019 -0.007 -0.188 8
-0.017 -0.006 -0.211 9
-0.01 -0.006 -0.19 8
-0.014 -0.032 -0.185 8
-0.031 -0.046 -0.166 9
-0.064 -0.062 -0.136 8
-0.096 -0.063 -0.087 9
-0.115 -0.039 -0.026 8
-0.104 -0.035 -0.023 8
-0.117 -0.013 0.046 9
-0.126 -0.006 0.103 6
-0.114 -0.005 0.103 11
-0.063 -0.012 0.063 8
0.007 -0.043 0.061 8
0.042 -0.096 0.093 9
0.038 -0.086 0.084 8
0.035 -0.099 0.097 9
0.032 -0.054 0.069 8
0.028 0.009 0.0 8
0.001 0.073 -0.064 9
-0.048 0.12 -0.082 8
-0.099 0.146 -0.059 8
-0.089 0.131 -0.053 7
-0.112 0.136 -0.04 10
-0.09 0.121 -0.057 9
-0.034 0.087 -0.082 8
0.04 0.044 -0.115 8
0.097 0.011 -0.14 9
0.114 0.003 -0.159 8
0.102 0.002 -0.143 9
0.119 -0.007 -0.213 8
0.131 -0.039 -0.328 8
0.143 -0.071 -0.354 9
0.139 -0.127 -0.27 8
0.125 -0.173 -0.157 7
-0.005 -0.131 -0.046 10
-0.005 -0.118 -0.041 8
-0.124 -0.021 0.081 9
-0.233 0.059 0.201 8
-0.268 0.092 0.258 9
-0.215 0.081 0.246 8
-0.133 0.022 0.188 8
-0.077 -0.046 0.137 9
-0.069 -0.042 0.123 8
-0.047 -0.071 0.118 9
-0.039 -0.064 0.147 8
-0.058 -0.042 0.157 7
-0.097 0.003 0.147 10
-0.15 0.042 0.122 8
-0.135 0.037 0.11 8
-0.193 0.063 0.068 9
-0.237 0.102 0.037 8
-0.239 0.135 0.017 9
-0.189 0.146 0.031 8
-0.118 0.131 0.089 8
-0.051 0.1 0.137 9
-0.046 0.09 0.123 8
0.008 0.052 0.133 9
0.045 0.016 0.072 6
0.053 0.007 -0.038 10
0.03 0.023 -0.115 9
-0.012 0.044 -0.114 8
-0.053 0.058 -0.061 9
-0.048 0.052 -0.054 8
-0.059 0.056 0.018 8
-0.033 0.038 0.091 9
0.01 0.0 0.133 8
0.052 -0.048 0.137 9
0.084 -0.114 0.078 8
0.111 -0.179 -0.054 8
0.1 -0.161 -0.049 7
0.114 -0.193 -0.24 10
0.089 -0.176 -0.445 8
0.041 -0.14 -0.48 9
-0.035 -0.072 -0.32 8
-0.115 0.029 -0.121 9
-0.119 0.102 0.051 8
-0.107 0.092 0.045 8
-0.035 0.106 0.169 9
0.072 0.071 0.272 8
0.158 0.033 0.378 9
0.181 0.014 0.384 8
0.151 0.005 0.278 7
0.09 0.016 0.118 10
0.081 0.014 0.106 8
0.012 0.038 -0.131 9
-0.067 0.063 -0.383 8
# end
#Thu Feb 26 20:17:11 GMT+08:00 20158
