# Supplementary material for: Abnormal Gait Behavior Detection for Elderly Based on Enhanced Wigner-Ville Analysis and Cloud Incremental SVM Learning
Source: Hindawi journal article supplement (doi:10.1155/2016/5869238), 2016-01-01
Supplement: f1 [file 5869238.f1.zip › Supplementary Materials/Original Data/Normal walking/original__4.txt]

# Accelerometer Values
# filename:  original__4.txt
# Saving start time: Thu Feb 26 20:17:15 GMT+08:00 2015

# sensor resolution: 0.0095825195m/s^2
#Sensorvendor: KIONIX, name: KX023 Accelerometer, type: 1,version : 1, range 39.240005

# X value, Y value, Z value, time diff in ms
-0.112 0.006 -0.227 8
-0.101 0.005 -0.204 9
-0.173 0.008 -0.222 8
-0.219 0.004 -0.216 8
-0.229 -0.004 -0.21 9
-0.214 -0.012 -0.21 8
-0.165 -0.025 -0.215 9
-0.125 -0.06 -0.238 8
-0.113 -0.054 -0.214 8
-0.109 -0.085 -0.231 9
-0.138 -0.084 -0.199 6
-0.185 -0.081 -0.157 11
-0.212 -0.083 -0.123 8
-0.235 -0.058 -0.092 8
-0.271 -0.017 -0.076 9
-0.244 -0.015 -0.069 8
-0.259 0.01 -0.079 9
-0.235 0.026 -0.118 8
-0.207 0.036 -0.177 8
-0.194 0.041 -0.2 9
-0.194 0.042 -0.154 8
-0.175 0.038 -0.138 8
-0.197 0.037 -0.125 7
-0.244 0.043 0.11 10
-0.26 0.059 0.124 9
-0.196 0.073 0.022 8
-0.092 0.079 -0.159 8
-0.022 0.1 -0.381 9
-0.02 0.09 -0.343 8
0.008 0.135 -0.416 9
0.031 0.154 -0.275 8
0.058 0.152 -0.086 8
0.094 0.149 0.039 9
0.137 0.123 0.126 8
0.124 0.111 0.113 7
0.165 0.065 0.171 10
0.171 0.016 0.204 8
0.115 -0.019 0.182 9
0.039 -0.048 0.127 8
-0.025 -0.064 0.099 9
-0.073 -0.073 0.082 8
-0.092 -0.076 0.044 8
-0.083 -0.069 0.04 9
-0.069 -0.072 -0.031 8
-0.026 -0.076 -0.122 8
0.019 -0.072 -0.168 9
0.062 -0.061 -0.122 7
0.088 -0.058 -0.005 10
0.067 -0.05 0.145 8
0.06 -0.045 0.131 8
-0.009 -0.028 0.259 9
-0.085 -0.002 0.281 8
-0.108 0.029 0.215 9
-0.076 0.066 0.114 8
-0.012 0.097 0.034 8
0.068 0.129 -0.002 9
0.061 0.116 -0.002 8
0.131 0.152 0.006 9
0.175 0.178 0.057 6
0.183 0.206 0.12 10
0.154 0.25 0.124 9
0.101 0.303 0.069 8
0.091 0.272 0.062 9
0.03 0.325 0.056 8
-0.031 0.372 0.006 8
-0.076 0.414 0.05 9
-0.08 0.436 0.144 8
-0.048 0.424 0.257 9
0.014 0.394 0.338 8
0.012 0.354 0.304 8
0.103 0.33 0.32 7
0.167 0.317 0.274 10
0.172 0.309 0.239 8
0.14 0.295 0.266 9
0.107 0.283 0.307 8
0.102 0.257 0.335 9
0.091 0.231 0.302 8
0.133 0.174 0.334 8
0.181 0.087 0.374 9
0.182 -0.017 0.429 8
0.134 -0.143 0.581 9
0.078 -0.304 0.833 8
0.07 -0.274 0.75 7
0.05 -0.431 0.965 10
0.06 -0.563 1.046 8
0.082 -0.715 0.977 9
0.094 -0.834 0.775 8
0.095 -0.878 0.529 8
0.095 -0.849 0.297 9
0.079 -0.729 0.065 8
0.071 -0.656 0.058 9
0.078 -0.532 -0.12 8
0.121 -0.451 -0.252 8
0.156 -0.373 -0.393 9
0.205 -0.305 -0.51 6
0.293 -0.259 -0.499 11
0.384 -0.228 -0.345 8
0.346 -0.205 -0.311 8
0.426 -0.193 -0.141 9
0.517 -0.199 -0.024 8
0.61 -0.199 0.018 8
0.652 -0.181 0.01 9
0.577 -0.153 -0.022 8
0.519 -0.138 -0.02 9
0.343 -0.076 -0.058 8
0.129 -0.005 -0.063 8
-0.062 0.005 -0.035 7
-0.195 -0.023 -0.016 10
-0.281 -0.067 -0.028 9
-0.346 -0.119 -0.071 8
-0.312 -0.107 -0.064 8
-0.347 -0.157 -0.152 9
-0.325 -0.212 -0.303 8
-0.258 -0.275 -0.505 9
-0.187 -0.308 -0.667 8
-0.128 -0.309 -0.719 8
-0.077 -0.312 -0.687 9
-0.069 -0.28 -0.618 8
-0.028 -0.285 -0.554 7
-0.008 -0.267 -0.474 10
-0.022 -0.238 -0.379 8
-0.052 -0.189 -0.311 9
-0.071 -0.12 -0.3 8
-0.053 -0.075 -0.321 8
-0.047 -0.068 -0.289 9
0.015 -0.046 -0.344 8
0.106 -0.016 -0.426 9
0.182 0.018 -0.45 8
0.228 0.074 -0.421 8
0.257 0.158 -0.395 9
0.231 0.142 -0.355 7
0.217 0.221 -0.286 10
0.129 0.295 -0.181 8
0.018 0.371 -0.105 8
-0.051 0.416 -0.067 9
-0.056 0.415 -0.069 8
-0.011 0.4 -0.116 9
0.037 0.39 -0.148 8
0.033 0.351 -0.133 8
0.024 0.359 -0.086 9
-0.03 0.397 0.023 8
-0.081 0.477 0.183 9
-0.114 0.563 0.352 6
-0.13 0.611 0.485 10
-0.145 0.629 0.591 9
-0.131 0.566 0.532 8
-0.146 0.587 0.607 9
-0.144 0.591 0.635 8
-0.114 0.554 0.626 8
-0.057 0.493 0.594 9
0.02 0.447 0.548 8
0.106 0.419 0.472 9
0.095 0.377 0.425 8
0.164 0.342 0.29 8
0.169 0.299 0.09 7
0.086 0.257 -0.126 10
-0.057 0.225 -0.302 8
-0.221 0.198 -0.405 9
-0.199 0.178 -0.364 8
-0.356 0.115 -0.374 9
-0.468 -0.016 -0.25 8
-0.512 -0.2 -0.03 8
-0.497 -0.362 0.174 9
-0.444 -0.495 0.319 8
-0.365 -0.659 0.4 9
-0.329 -0.593 0.36 8
-0.223 -0.752 0.398 7
-0.105 -0.851 0.407 10
-0.004 -0.906 0.383 8
0.055 -0.899 0.328 9
0.051 -0.814 0.208 8
-0.01 -0.689 -0.012 8
-0.009 -0.62 -0.01 9
-0.121 -0.486 -0.275 8
-0.265 -0.338 -0.453 9
-0.405 -0.182 -0.509 8
-0.466 -0.041 -0.531 8
-0.386 0.069 -0.542 9
-0.348 0.062 -0.488 6
-0.185 0.118 -0.463 10
-0.009 0.123 -0.381 9
0.146 0.13 -0.204 8
0.259 0.124 0.063 9
0.33 0.054 0.314 8
0.387 -0.06 0.459 8
0.434 -0.169 0.5 9
0.39 -0.152 0.45 8
0.394 -0.22 0.409 9
0.332 -0.218 0.223 8
0.223 -0.171 -0.069 8
0.113 -0.152 -0.315 7
0.044 -0.165 -0.533 10
0.014 -0.161 -0.774 9
0.012 -0.145 -0.697 8
0.002 -0.118 -0.934 8
0.009 -0.081 -1.096 9
0.031 -0.022 -1.085 8
0.052 0.058 -0.865 9
0.063 0.118 -0.497 8
0.05 0.17 -0.124 8
0.045 0.153 -0.112 9
-0.006 0.22 0.203 8
-0.079 0.271 0.459 7
-0.135 0.291 0.61 10
-0.158 0.297 0.647 8
-0.165 0.297 0.553 9
-0.148 0.267 0.498 8
-0.143 0.267 0.258 8
-0.115 0.262 -0.081 9
-0.087 0.282 -0.427 8
-0.074 0.346 -0.628 9
-0.067 0.399 -0.531 8
-0.062 0.435 -0.258 8
-0.056 0.391 -0.232 9
-0.044 0.431 0.069 7
0.0 0.446 0.36 10
0.066 0.435 0.577 8
0.135 0.395 0.704 8
0.195 0.33 0.74 9
0.239 0.275 0.713 8
0.215 0.248 0.642 9
0.226 0.229 0.576 8
0.189 0.22 0.468 8
0.08 0.219 0.337 9
-0.095 0.218 0.202 8
-0.271 0.202 0.056 9
-0.244 0.182 0.05 6
-0.359 0.168 -0.127 10
-0.371 0.167 -0.303 9
-0.299 0.174 -0.461 8
-0.194 0.217 -0.66 8
-0.053 0.286 -0.858 9
0.107 0.329 -0.911 8
0.262 0.343 -0.728 9
0.236 0.308 -0.655 8
0.396 0.284 -0.326 8
0.538 0.218 0.061 9
0.623 0.138 0.439 8
0.625 0.053 0.741 7
0.559 -0.086 1.077 10
0.458 -0.287 1.408 8
0.412 -0.258 1.267 9
0.259 -0.442 1.466 8
0.095 -0.599 1.472 9
-0.037 -0.743 1.33 8
-0.162 -0.851 1.127 8
-0.27 -0.909 0.792 9
-0.243 -0.818 0.713 8
-0.315 -0.827 0.642 9
-0.313 -0.787 -0.165 8
-0.242 -0.716 -0.541 7
-0.134 -0.642 -0.827 10
-0.009 -0.584 -0.928 8
0.107 -0.54 -0.859 8
0.097 -0.486 -0.773 9
0.197 -0.449 -0.598 8
0.279 -0.408 -0.402 9
0.362 -0.374 -0.25 8
0.395 -0.336 -0.147 8
0.295 -0.275 -0.1 9
0.101 -0.177 -0.102 8
0.091 -0.159 -0.092 9
-0.109 -0.043 -0.122 6
-0.278 0.027 -0.173 10
-0.411 0.051 -0.21 9
-0.482 0.056 -0.227 8
-0.434 0.029 -0.281 9
-0.285 -0.017 -0.382 8
-0.256 -0.015 -0.344 8
-0.098 -0.06 -0.448 9
0.019 -0.09 -0.528 8
0.085 -0.105 -0.551 9
0.113 -0.091 -0.499 8
0.117 -0.052 -0.405 8
0.105 -0.047 -0.364 7
0.088 -0.005 -0.286 10
0.068 0.042 -0.232 9
0.049 0.09 -0.154 8
0.047 0.12 -0.044 8
0.065 0.134 0.039 9
0.063 0.164 0.068 8
0.03 0.233 0.064 8
0.027 0.21 0.058 9
-0.009 0.275 0.026 8
-0.033 0.308 -0.04 9
-0.053 0.322 -0.133 8
-0.076 0.323 -0.241 7
-0.078 0.309 -0.318 10
-0.07 0.278 -0.34 8
-0.034 0.25 -0.306 9
0.009 0.233 -0.301 8
0.033 0.226 -0.223 8
0.048 0.218 -0.093 9
0.063 0.209 -0.002 8
0.074 0.21 0.019 9
0.066 0.189 0.017 8
0.05 0.205 -0.021 8
-0.001 0.242 -0.056 9
-0.061 0.269 -0.047 6
-0.103 0.265 -0.005 11
-0.115 0.247 0.087 8
-0.094 0.213 0.27 8
-0.085 0.191 0.243 9
-0.034 0.126 0.393 8
0.063 0.067 0.38 9
0.187 0.044 0.242 8
0.263 0.07 0.081 8
0.284 0.146 -0.022 9
0.255 0.243 -0.059 8
0.229 0.219 -0.053 9
0.15 0.302 -0.017 6
0.048 0.373 0.105 10
-0.061 0.434 0.267 9
-0.176 0.46 0.362 8
-0.285 0.445 0.349 8
-0.378 0.407 0.261 9
-0.34 0.366 0.234 8
-0.423 0.339 0.092 9
-0.469 0.318 -0.083 8
-0.447 0.276 -0.284 8
-0.368 0.224 -0.485 9
-0.253 0.156 -0.527 8
-0.228 0.141 -0.474 7
-0.101 0.006 -0.286 10
-0.016 -0.166 0.103 8
-0.004 -0.315 0.606 9
-0.044 -0.424 1.104 8
-0.094 -0.524 1.437 9
-0.122 -0.65 1.517 8
-0.132 -0.743 1.442 8
-0.119 -0.669 1.298 9
-0.113 -0.698 1.086 8
-0.088 -0.69 0.726 8
-0.046 -0.683 0.356 9
0.005 -0.667 0.057 7
0.035 -0.649 -0.226 10
0.031 -0.605 -0.509 8
0.028 -0.544 -0.458 8
-0.035 -0.47 -0.647 9
-0.09 -0.398 -0.729 8
-0.141 -0.315 -0.802 9
-0.155 -0.227 -0.836 8
-0.144 -0.144 -0.756 8
-0.129 -0.129 -0.681 9
-0.116 -0.029 -0.518 8
-0.077 0.052 -0.257 9
0.008 0.108 0.068 6
0.104 0.158 0.309 10
0.17 0.2 0.414 9
0.193 0.224 0.434 8
0.173 0.201 0.391 9
0.156 0.212 0.369 8
0.086 0.214 0.318 8
-0.024 0.206 0.236 9
-0.149 0.191 0.147 8
-0.29 0.169 0.058 9
-0.392 0.136 -0.092 8
-0.353 0.122 -0.083 8
-0.35 0.09 -0.286 7
-0.25 0.064 -0.44 10
-0.125 0.045 -0.503 8
-0.014 0.031 -0.485 9
0.099 0.01 -0.417 8
0.211 -0.036 -0.303 9
0.19 -0.033 -0.273 8
0.248 -0.072 -0.146 8
0.234 -0.07 -0.056 9
0.189 -0.069 -0.039 8
0.127 -0.076 -0.098 9
0.039 -0.051 -0.185 8
0.035 -0.046 -0.167 7
-0.047 -0.005 -0.231 10
-0.095 0.025 -0.266 8
-0.108 0.045 -0.285 9
-0.094 0.057 -0.288 8
-0.074 0.069 -0.279 8
-0.061 0.091 -0.243 9
-0.056 0.117 -0.19 8
-0.05 0.105 -0.171 9
-0.047 0.132 -0.131 8
-0.039 0.164 -0.092 8
-0.027 0.218 -0.067 9
-0.02 0.318 -0.045 6
-0.009 0.405 0.038 11
-0.008 0.365 0.208 8
0.036 0.328 0.187 8
0.118 0.427 0.396 9
0.2 0.407 0.553 8
0.253 0.364 0.603 8
0.275 0.321 0.539 9
0.262 0.294 0.379 8
0.236 0.265 0.341 9
0.168 0.259 0.127 8
0.057 0.253 -0.057 8
-0.05 0.249 -0.118 7
-0.101 0.25 -0.135 10
-0.069 0.22 -0.2 9
0.02 0.183 -0.287 8
0.018 0.164 -0.258 8
0.115 0.167 -0.365 9
0.213 0.148 -0.509 8
0.34 0.079 -0.666 9
0.448 -0.006 -0.746 8
0.449 -0.092 -0.638 8
0.348 -0.18 -0.323 9
0.313 -0.162 -0.291 8
0.186 -0.242 0.159 7
0.061 -0.277 0.62 10
-0.057 -0.288 1.083 8
-0.14 -0.296 1.458 9
-0.16 -0.321 1.632 8
-0.135 -0.371 1.634 8
-0.121 -0.334 1.47 9
-0.099 -0.422 1.337 8
-0.122 -0.52 1.073 9
-0.193 -0.56 0.638 8
-0.275 -0.522 0.158 8
-0.369 -0.464 -0.259 9
-0.332 -0.418 -0.233 7
-0.436 -0.328 -0.594 10
-0.507 -0.174 -0.815 8
-0.418 -0.129 -0.858 8
-0.171 -0.182 -0.79 9
0.057 -0.22 -0.708 8
0.254 -0.268 -0.61 9
0.228 -0.241 -0.549 8
0.421 -0.273 -0.371 8
0.554 -0.237 -0.151 9
0.593 -0.16 0.045 8
0.567 -0.072 0.204 9
0.461 0.018 0.301 6
0.286 0.11 0.343 10
0.257 0.099 0.309 9
0.101 0.19 0.315 8
-0.003 0.251 0.303 9
-0.05 0.278 0.283 8
-0.051 0.272 0.258 8
-0.045 0.248 0.231 9
-0.035 0.199 0.205 8
-0.032 0.179 0.184 8
-0.007 0.098 0.111 9
0.01 0.015 -0.093 8
0.007 -0.046 -0.359 7
-0.027 -0.105 -0.532 10
-0.076 -0.153 -0.59 8
-0.103 -0.157 -0.579 9
-0.093 -0.142 -0.521 8
-0.067 -0.15 -0.484 9
-0.003 -0.192 -0.428 8
0.065 -0.211 -0.358 8
0.12 -0.17 -0.281 9
0.177 -0.103 -0.183 8
0.223 -0.06 -0.034 9
0.2 -0.054 -0.031 8
0.194 -0.028 0.148 7
0.135 0.027 0.302 10
0.044 0.107 0.401 8
-0.06 0.178 0.433 9
-0.144 0.229 0.37 8
-0.183 0.27 0.207 8
-0.164 0.243 0.187 9
-0.172 0.263 -0.026 8
-0.18 0.271 -0.209 8
-0.21 0.287 -0.291 9
-0.248 0.295 -0.218 8
-0.274 0.299 -0.002 9
-0.246 0.269 -0.002 6
-0.255 0.273 0.214 10
-0.214 0.242 0.351 9
-0.096 0.18 0.433 8
0.064 0.1 0.433 9
0.219 0.024 0.362 8
0.313 -0.018 0.246 8
0.288 -0.032 0.055 9
0.259 -0.028 0.049 8
0.156 -0.014 -0.172 9
0.042 -0.002 -0.35 8
-0.038 -0.017 -0.453 8
-0.073 -0.036 -0.501 7
-0.071 -0.053 -0.497 10
-0.055 -0.067 -0.455 9
-0.049 -0.06 -0.41 8
-0.031 -0.067 -0.33 8
-0.006 -0.075 -0.195 9
0.025 -0.097 -0.044 8
0.072 -0.128 0.091 9
0.131 -0.176 0.187 8
0.118 -0.158 0.168 8
0.19 -0.203 0.185 9
0.244 -0.212 0.09 8
0.261 -0.207 -0.084 7
0.266 -0.222 -0.252 10
0.274 -0.245 -0.352 8
0.272 -0.284 -0.372 9
0.245 -0.255 -0.335 8
0.162 -0.256 -0.322 8
0.023 -0.121 -0.307 9
-0.059 -0.013 -0.213 8
-0.117 0.035 -0.133 9
-0.204 0.134 -0.133 8
-0.219 0.182 -0.159 8
-0.197 0.164 -0.143 9
-0.129 0.136 -0.124 7
-0.079 0.13 -0.06 10
-0.053 0.158 -0.017 8
-0.06 0.185 0.072 8
-0.069 0.186 0.224 9
-0.045 0.14 0.393 8
-0.04 0.126 0.354 9
0.0 0.081 0.477 8
0.017 0.069 0.52 8
0.009 0.092 0.461 9
0.001 0.126 0.294 8
-0.005 0.161 0.076 9
-0.005 0.144 0.069 6
-0.028 0.191 -0.132 10
-0.054 0.219 -0.263 9
-0.064 0.218 -0.325 8
-0.064 0.211 -0.332 8
-0.073 0.195 -0.276 9
-0.087 0.145 -0.181 8
-0.073 0.074 -0.097 9
-0.065 0.067 -0.088 8
-0.028 0.001 -0.057 8
0.009 -0.057 -0.064 9
0.036 -0.1 -0.055 8
0.059 -0.14 -0.004 7
0.093 -0.173 0.068 10
0.113 -0.192 0.096 8
0.101 -0.173 0.087 9
0.097 -0.18 0.051 8
0.09 -0.164 -0.019 9
0.072 -0.133 -0.064 8
0.04 -0.097 -0.044 8
0.007 -0.065 0.017 9
0.006 -0.058 0.015 8
-0.018 -0.034 0.068 8
-0.046 -0.008 0.136 9
-0.097 0.02 0.22 7
-0.158 0.051 0.234 10
-0.187 0.079 0.163 8
-0.18 0.091 0.022 8
-0.162 0.082 0.019 9
-0.136 0.075 -0.124 8
-0.108 0.074 -0.219 9
-0.08 0.077 -0.272 8
-0.039 0.067 -0.315 8
-0.007 0.055 -0.338 9
-0.005 0.062 -0.305 8
-0.005 0.056 -0.274 9
-0.032 0.084 -0.208 6
-0.076 0.119 -0.116 10
-0.116 0.158 0.039 9
-0.123 0.172 0.222 8
-0.092 0.148 0.332 9
-0.033 0.091 0.371 8
-0.03 0.082 0.333 8
0.006 0.035 0.275 9
0.022 0.029 0.118 8
0.046 0.045 0.031 9
0.055 0.032 -0.004 8
0.071 -0.026 -0.086 8
0.064 -0.023 -0.077 7
0.1 -0.085 -0.082 10
0.148 -0.134 -0.022 9
0.189 -0.171 0.041 8
0.187 -0.166 0.115 8
0.134 -0.115 0.167 9
0.068 -0.055 0.149 8
0.029 -0.013 0.051 9
0.026 -0.011 0.046 8
0.006 0.006 -0.078 8
-0.012 0.015 -0.176 9
-0.029 0.009 -0.218 8
-0.031 -0.016 -0.217 7
-0.017 -0.04 -0.19 10
-0.004 -0.053 -0.152 8
-0.004 -0.048 -0.137 9
-0.001 -0.049 -0.108 8
-0.011 -0.036 -0.107 8
-0.008 -0.02 -0.12 9
0.016 -0.011 -0.13 8
0.04 -0.006 -0.131 9
0.036 -0.006 -0.118 8
0.036 -0.001 -0.098 8
0.019 0.006 -0.064 9
-0.009 0.017 -0.042 6
-0.03 0.026 -0.048 11
-0.037 0.022 -0.047 8
-0.038 0.01 -0.032 8
-0.034 0.009 -0.029 9
-0.026 0.0 -0.052 8
0.021 -0.013 -0.111 9
0.103 -0.059 -0.141 8
0.135 -0.091 -0.11 8
0.094 -0.053 -0.078 9
0.038 -0.005 -0.072 8
0.034 -0.005 -0.065 8
0.014 0.005 -0.039 7
0.013 0.003 0.009 10
0.025 0.002 0.074 9
0.053 0.0 0.14 8
0.083 -0.007 0.163 8
0.09 -0.003 0.129 9
0.081 -0.002 0.116 8
0.07 0.0 0.049 9
0.062 -0.009 -0.018 8
0.038 -0.016 -0.061 8
-0.008 -0.012 -0.072 9
-0.057 -0.004 -0.071 8
-0.051 -0.003 -0.064 7
-0.101 0.031 -0.071 10
-0.153 0.101 -0.08 8
-0.17 0.154 -0.074 9
-0.135 0.134 -0.051 8
-0.085 0.099 -0.025 8
-0.062 0.12 0.0 9
-0.068 0.143 0.066 8
-0.061 0.129 0.059 9
-0.059 0.093 0.162 8
-0.028 0.026 0.207 8
0.008 -0.008 0.148 9
0.02 -0.007 0.059 7
0.022 -0.013 0.013 10
0.034 -0.036 -0.017 8
0.031 -0.033 -0.015 8
0.037 -0.053 -0.055 9
0.02 -0.038 -0.089 8
-0.012 0.0 -0.106 9
-0.044 0.028 -0.106 8
-0.074 0.067 -0.095 8
-0.067 0.061 -0.086 9
-0.084 0.099 -0.077 8
-0.059 0.073 -0.024 9
-0.004 -0.002 0.014 6
0.042 -0.054 0.015 10
0.06 -0.063 -0.01 9
0.068 -0.073 -0.021 8
0.061 -0.065 -0.019 9
0.073 -0.086 -0.018 8
0.071 -0.076 -0.02 8
0.041 -0.032 -0.011 9
-0.007 0.02 0.025 8
-0.045 0.036 0.064 9
-0.049 0.023 0.068 8
-0.044 0.021 0.062 8
-0.044 0.016 0.033 7
-0.076 0.028 0.004 10
-0.121 0.032 -0.011 8
-0.136 0.025 -0.031 9
-0.096 0.001 -0.06 8
-0.012 -0.044 -0.116 9
-0.01 -0.039 -0.104 8
0.059 -0.084 -0.15 8
0.08 -0.097 -0.121 9
0.032 -0.055 -0.053 8
-0.087 0.062 -0.003 9
-0.208 0.202 0.012 8
-0.188 0.182 0.011 7
-0.226 0.245 -0.008 10
-0.162 0.203 -0.046 8
-0.043 0.089 -0.081 9
0.081 -0.036 -0.106 8
0.183 -0.14 -0.137 8
0.232 -0.202 -0.139 9
0.201 -0.203 -0.094 8
0.181 -0.182 -0.085 9
0.087 -0.122 -0.038 8
-0.023 -0.035 -0.001 8
-0.111 0.022 0.031 9
-0.145 0.041 0.05 6
-0.114 0.055 0.044 10
-0.023 0.035 0.018 9
-0.021 0.031 0.016 8
0.076 -0.029 -0.047 9
0.146 -0.08 -0.105 8
0.165 -0.101 -0.073 8
0.12 -0.09 0.031 9
0.033 -0.036 0.193 8
0.029 -0.033 0.174 9
-0.06 0.049 0.338 8
-0.107 0.13 0.408 8
-0.101 0.167 0.329 7
-0.082 0.147 0.151 10
-0.063 0.129 -0.009 9
-0.032 0.103 -0.149 8
-0.029 0.093 -0.134 8
-0.003 0.049 -0.229 9
0.013 0.01 -0.219 8
0.015 -0.013 -0.142 9
0.0 -0.003 -0.063 8
-0.018 0.049 0.003 8
-0.022 0.089 0.097 9
-0.02 0.08 0.087 8
-0.014 0.077 0.18 7
-0.022 0.052 0.22 10
-0.035 0.016 0.205 8
-0.015 -0.029 0.137 9
0.035 -0.086 0.038 8
0.091 -0.13 -0.041 8
0.082 -0.117 -0.037 9
0.122 -0.141 -0.085 8
0.133 -0.142 -0.114 9
0.123 -0.127 -0.124 8
0.099 -0.11 -0.128 8
0.071 -0.088 -0.137 9
0.064 -0.079 -0.123 7
0.033 -0.044 -0.13 10
-0.008 0.004 -0.248 8
-0.054 0.031 -0.365 8
-0.083 0.011 -0.224 9
-0.129 0.009 0.0 8
-0.177 0.09 0.1 9
-0.156 0.165 0.151 8
-0.141 0.148 0.136 8
-0.048 0.126 0.23 9
0.067 0.054 0.354 8
0.158 0.001 0.456 9
0.202 0.002 0.539 6
0.201 0.057 0.546 10
0.181 0.108 0.409 9
0.163 0.097 0.368 8
0.164 0.085 0.141 8
0.169 0.027 -0.073 9
0.145 -0.034 -0.235 8
0.092 -0.077 -0.38 9
0.032 -0.09 -0.485 8
0.029 -0.081 -0.437 8
# end
#Thu Feb 26 20:17:21 GMT+08:00 2015.
