# Supplementary material for: Abnormal Gait Behavior Detection for Elderly Based on Enhanced Wigner-Ville Analysis and Cloud Incremental SVM Learning
Source: Hindawi journal article supplement (doi:10.1155/2016/5869238), 2016-01-01
Supplement: f1 [file 5869238.f1.zip › Supplementary Materials/Original Data/Normal walking/original__5.txt]

# Accelerometer Values
# filename:  original__5.txt
# Saving start time: Thu Feb 26 20:17:25 GMT+08:00 2015

# sensor resolution: 0.0095825195m/s^2
#Sensorvendor: KIONIX, name: KX023 Accelerometer, type: 1,version : 1, range 39.240005

# X value, Y value, Z value, time diff in ms
-0.113 0.019 -0.101 9
-0.102 0.017 -0.091 8
-0.023 0.004 0.036 8
0.049 -0.013 0.145 9
0.078 -0.022 0.205 8
0.077 -0.021 0.195 9
0.068 -0.016 0.146 8
0.05 -0.009 0.131 8
0.045 -0.008 0.118 7
0.016 -0.003 0.121 10
0.001 -0.005 0.066 9
0.0 -0.01 -0.052 8
-0.025 -0.008 -0.158 8
-0.1 0.0 -0.213 9
-0.17 0.016 -0.22 8
-0.153 0.015 -0.198 9
-0.148 0.021 -0.164 8
-0.108 0.011 -0.084 8
-0.079 -0.001 0.054 9
-0.049 -0.011 0.218 8
-0.029 -0.018 0.328 7
-0.012 -0.026 0.371 10
-0.01 -0.023 0.334 8
0.012 -0.036 0.328 9
0.035 -0.045 0.267 8
0.054 -0.041 0.186 8
0.059 -0.029 0.129 9
0.065 -0.024 0.052 8
0.078 -0.026 -0.088 9
0.07 -0.023 -0.079 8
0.068 -0.025 -0.197 8
0.049 -0.026 -0.227 9
0.027 -0.02 -0.193 7
0.0 -0.012 -0.117 10
-0.031 -0.004 -0.013 8
-0.028 0.01 0.084 8
-0.025 0.009 0.076 9
-0.038 0.016 0.128 8
0.009 0.013 0.124 9
0.047 0.008 0.07 8
0.049 0.009 0.01 8
0.025 0.009 0.008 9
0.023 0.008 0.007 8
-0.015 0.008 0.041 9
-0.051 0.008 0.064 6
-0.074 0.006 0.069 10
-0.09 0.0 0.057 9
-0.105 0.0 0.031 8
-0.102 0.004 -0.008 9
-0.092 0.004 -0.007 8
-0.078 0.003 -0.077 8
-0.066 0.004 -0.173 9
-0.057 0.004 -0.252 8
-0.065 0.004 -0.289 8
-0.126 0.006 -0.283 9
-0.206 -0.001 -0.219 8
-0.185 -0.001 -0.197 7
-0.239 -0.014 -0.027 10
-0.319 -0.017 0.17 9
-0.436 -0.017 0.236 8
-0.526 -0.02 0.118 8
-0.51 -0.019 -0.107 9
-0.377 -0.009 -0.388 8
-0.339 -0.008 -0.349 8
-0.181 0.005 -0.666 9
-0.047 0.016 -0.903 8
0.074 0.026 -0.937 9
0.174 0.031 -0.774 8
0.226 0.034 -0.497 7
0.23 0.043 -0.188 10
0.207 0.038 -0.169 8
0.188 0.048 0.071 9
0.142 0.057 0.238 8
0.093 0.058 0.387 8
0.099 0.051 0.483 9
0.139 0.045 0.411 8
0.17 0.048 0.219 8
0.153 0.043 0.197 9
0.159 0.044 -0.011 8
0.129 0.04 -0.229 9
0.053 0.031 -0.403 6
-0.054 0.02 -0.484 10
-0.135 0.011 -0.475 9
-0.163 -0.001 -0.338 8
-0.147 -0.001 -0.304 9
-0.157 -0.015 -0.135 8
-0.153 -0.015 -0.051 8
-0.111 -0.022 -0.017 9
-0.046 -0.026 0.0 8
-0.003 -0.012 0.013 9
0.016 0.01 0.036 8
0.015 0.009 0.033 8
0.015 0.039 0.08 7
-0.013 0.08 0.127 10
-0.049 0.126 0.138 9
-0.086 0.162 0.119 8
-0.113 0.189 0.035 8
-0.106 0.196 -0.091 9
-0.095 0.176 -0.082 8
-0.063 0.192 -0.132 9
-0.013 0.236 -0.083 8
0.071 0.269 -0.023 8
0.15 0.279 0.016 9
0.162 0.298 0.039 8
0.146 0.268 0.035 7
0.106 0.302 0.077 10
0.041 0.321 0.169 8
-0.024 0.317 0.293 9
-0.071 0.297 0.376 8
-0.097 0.276 0.354 8
-0.085 0.249 0.259 9
-0.077 0.224 0.171 8
-0.031 0.197 0.154 9
-0.008 0.189 0.094 8
-0.011 0.191 0.051 8
-0.038 0.214 0.014 9
-0.07 0.242 -0.02 6
-0.056 0.253 -0.026 11
-0.051 0.228 -0.023 8
-0.017 0.224 -0.01 8
0.047 0.181 0.003 9
0.143 0.082 0.021 8
0.215 -0.033 0.075 9
0.246 -0.176 0.175 8
0.244 -0.358 0.291 8
0.22 -0.322 0.262 9
0.189 -0.449 0.418 8
0.145 -0.499 0.579 9
0.112 -0.498 0.64 6
0.074 -0.452 0.611 10
0.035 -0.394 0.53 9
0.053 -0.323 0.331 8
0.047 -0.291 0.297 8
0.15 -0.235 0.066 9
0.329 -0.214 0.059 8
0.521 -0.2 0.241 9
0.66 -0.189 0.444 8
0.751 -0.185 0.663 8
0.793 -0.191 0.853 9
0.714 -0.172 0.767 8
0.714 -0.188 0.834 7
0.648 -0.235 0.756 10
0.526 -0.326 0.582 8
0.375 -0.413 0.349 9
0.232 -0.452 0.126 8
0.116 -0.446 -0.117 9
0.104 -0.401 -0.106 8
0.004 -0.352 -0.405 8
-0.105 -0.263 -0.632 9
-0.227 -0.148 -0.72 8
-0.382 -0.03 -0.657 9
-0.575 0.05 -0.432 8
-0.518 0.045 -0.389 7
-0.66 0.071 -0.102 10
-0.662 0.05 0.121 8
-0.527 -0.001 0.235 8
-0.315 -0.109 0.264 9
-0.092 -0.25 0.172 8
0.096 -0.342 -0.082 9
0.213 -0.378 -0.359 8
0.191 -0.34 -0.323 8
0.231 -0.331 -0.51 9
0.211 -0.303 -0.612 8
0.155 -0.281 -0.603 9
0.107 -0.253 -0.513 6
0.123 -0.233 -0.419 10
0.199 -0.231 -0.352 9
0.179 -0.208 -0.317 8
0.256 -0.194 -0.277 9
0.294 -0.159 -0.237 8
0.277 -0.122 -0.19 8
0.215 -0.065 -0.128 9
0.136 -0.001 -0.052 8
0.056 0.025 0.008 9
0.05 0.023 0.007 8
-0.01 0.044 0.0 8
-0.034 0.097 -0.07 7
-0.01 0.154 -0.138 10
0.046 0.216 -0.216 9
0.08 0.285 -0.264 8
0.081 0.337 -0.248 8
0.073 0.303 -0.223 9
0.043 0.351 -0.191 8
-0.025 0.429 -0.148 9
-0.11 0.532 -0.07 8
-0.184 0.619 0.081 8
-0.239 0.676 0.297 9
-0.215 0.608 0.267 8
-0.222 0.634 0.477 7
-0.18 0.611 0.606 10
-0.115 0.566 0.634 8
-0.026 0.524 0.581 9
0.068 0.502 0.466 8
0.108 0.503 0.284 8
0.097 0.453 0.255 9
0.075 0.457 0.036 8
0.014 0.448 -0.13 9
-0.073 0.443 -0.144 8
-0.146 0.424 -0.014 8
-0.184 0.366 0.156 9
-0.166 0.329 0.14 6
-0.186 0.212 0.263 11
-0.216 0.06 0.312 8
-0.244 -0.105 0.265 8
-0.246 -0.288 0.085 9
-0.211 -0.433 -0.153 8
-0.141 -0.54 -0.321 9
-0.082 -0.65 -0.364 8
-0.074 -0.585 -0.328 8
-0.043 -0.691 -0.198 9
-0.048 -0.755 0.091 8
-0.097 -0.765 0.349 8
-0.194 -0.739 0.472 7
-0.273 -0.703 0.454 10
-0.269 -0.644 0.236 9
-0.242 -0.579 0.212 8
-0.209 -0.493 -0.151 8
-0.189 -0.405 -0.505 9
-0.191 -0.311 -0.739 8
-0.19 -0.239 -0.77 9
-0.169 -0.21 -0.616 8
-0.127 -0.198 -0.421 8
-0.114 -0.178 -0.379 9
-0.047 -0.146 -0.199 8
0.034 -0.111 -0.013 7
0.108 -0.093 0.14 10
0.135 -0.037 0.207 8
0.124 0.017 0.195 9
0.105 0.028 0.131 8
0.095 0.025 0.118 8
0.063 0.035 0.001 9
0.016 0.031 -0.12 8
-0.037 -0.009 -0.21 9
-0.096 -0.069 -0.311 8
-0.153 -0.124 -0.451 8
-0.195 -0.148 -0.581 9
-0.175 -0.133 -0.522 7
-0.192 -0.132 -0.578 10
-0.174 -0.11 -0.523 8
-0.1 -0.064 -0.395 8
0.009 -0.003 -0.263 9
0.101 0.058 -0.147 8
0.09 0.052 -0.133 9
0.137 0.131 -0.018 8
0.147 0.206 0.093 8
0.134 0.253 0.223 9
0.098 0.28 0.373 8
0.05 0.286 0.479 9
0.045 0.257 0.431 6
0.004 0.257 0.446 10
-0.024 0.259 0.324 9
-0.018 0.26 0.135 8
0.011 0.282 -0.005 9
0.021 0.341 -0.072 8
-0.012 0.423 -0.069 8
-0.092 0.504 0.013 9
-0.083 0.453 0.011 8
-0.179 0.509 0.169 9
-0.246 0.529 0.307 8
-0.263 0.514 0.371 8
-0.214 0.462 0.401 7
-0.145 0.396 0.415 10
-0.08 0.344 0.411 8
-0.072 0.31 0.37 9
0.008 0.264 0.357 8
0.071 0.23 0.31 9
0.097 0.218 0.228 8
0.09 0.218 0.116 8
0.063 0.233 0.025 9
0.029 0.266 -0.011 8
0.026 0.239 -0.01 9
-0.009 0.3 -0.022 8
0.006 0.349 -0.012 7
0.109 0.354 -0.001 10
0.247 0.319 0.023 8
0.376 0.237 0.087 9
0.468 0.13 0.152 8
0.421 0.117 0.137 8
0.462 -0.01 0.225 9
0.45 -0.19 0.334 8
0.401 -0.378 0.508 9
0.291 -0.525 0.74 8
0.135 -0.656 0.889 8
-0.007 -0.791 0.908 9
-0.006 -0.712 0.817 6
-0.117 -0.82 0.73 11
-0.187 -0.874 0.502 8
-0.189 -0.848 0.155 8
-0.127 -0.82 -0.214 9
-0.07 -0.75 -0.595 8
-0.027 -0.565 -0.889 8
-0.024 -0.508 -0.8 9
0.058 -0.344 -0.872 8
0.157 -0.202 -0.709 9
0.221 -0.059 -0.346 8
0.284 0.035 0.126 8
0.255 0.032 0.586 7
0.372 0.033 0.891 10
0.335 0.029 0.801 9
0.289 -0.003 0.793 8
0.227 -0.051 0.503 8
0.128 -0.107 0.137 9
0.005 -0.158 -0.213 8
-0.105 -0.175 -0.524 9
-0.195 -0.166 -0.722 8
-0.176 -0.15 -0.65 8
-0.255 -0.142 -0.777 9
-0.323 -0.166 -0.824 8
-0.368 -0.223 -0.775 7
-0.377 -0.272 -0.7 10
-0.339 -0.307 -0.637 8
-0.305 -0.334 -0.569 9
-0.275 -0.3 -0.512 8
-0.177 -0.292 -0.426 8
-0.132 -0.258 -0.338 9
-0.103 -0.219 -0.265 8
-0.084 -0.173 -0.208 9
-0.053 -0.117 -0.173 8
-0.048 -0.105 -0.156 8
0.007 -0.048 -0.137 9
0.058 0.038 -0.124 7
0.081 0.162 -0.109 10
0.088 0.281 -0.083 8
0.096 0.352 -0.063 8
0.132 0.384 -0.067 9
0.119 0.346 -0.06 8
0.189 0.37 -0.049 9
0.25 0.381 -0.005 8
0.304 0.391 0.023 8
0.342 0.416 0.003 9
0.321 0.477 -0.072 8
0.226 0.579 -0.187 9
0.203 0.521 -0.169 6
0.047 0.647 -0.21 10
-0.126 0.755 -0.076 9
-0.272 0.791 0.238 8
-0.369 0.741 0.623 9
-0.343 0.684 0.95 8
-0.222 0.605 1.151 8
-0.199 0.544 1.036 9
-0.064 0.412 1.081 8
0.079 0.296 0.995 9
0.219 0.214 0.828 8
0.323 0.163 0.601 8
0.349 0.145 0.357 7
0.261 0.138 0.084 10
0.235 0.124 0.075 8
0.061 0.137 -0.267 9
-0.11 0.17 -0.541 8
-0.258 0.179 -0.629 9
-0.38 0.121 -0.482 8
-0.501 0.008 -0.112 8
-0.615 -0.146 0.415 9
-0.553 -0.131 0.373 8
-0.6 -0.301 0.979 9
-0.516 -0.437 1.43 8
-0.35 -0.563 1.524 7
-0.165 -0.715 1.198 10
0.03 -0.847 0.598 8
0.147 -0.866 -0.01 9
0.133 -0.779 -0.009 8
0.122 -0.711 -0.532 8
0.008 -0.611 -0.918 9
-0.164 -0.497 -1.068 8
-0.359 -0.403 -0.994 8
-0.529 -0.337 -0.752 9
-0.476 -0.303 -0.403 8
-0.564 -0.273 -0.362 9
-0.545 -0.155 -0.07 6
-0.383 -0.146 0.081 10
-0.112 -0.161 0.139 9
0.144 -0.177 0.156 8
0.325 -0.188 0.148 9
0.292 -0.169 0.133 8
0.407 -0.194 0.098 8
0.481 -0.224 -0.026 9
0.506 -0.224 -0.269 8
0.463 -0.199 -0.52 9
0.369 -0.156 -0.741 8
0.26 -0.105 -0.932 8
0.234 -0.094 -0.838 7
0.127 -0.08 -0.91 10
0.008 -0.093 -0.785 9
-0.118 -0.106 -0.552 8
-0.196 -0.136 -0.34 8
-0.189 -0.174 -0.211 9
-0.144 -0.192 -0.172 8
-0.13 -0.173 -0.155 9
-0.087 -0.172 -0.178 8
-0.077 -0.155 -0.24 8
-0.114 -0.119 -0.33 9
-0.175 -0.073 -0.406 8
-0.243 -0.026 -0.42 7
-0.303 0.018 -0.404 10
-0.273 0.016 -0.363 8
-0.319 0.059 -0.351 9
-0.337 0.12 -0.341 8
-0.312 0.202 -0.314 8
-0.256 0.267 -0.281 9
-0.164 0.321 -0.23 8
-0.051 0.382 -0.021 9
-0.046 0.344 -0.019 8
0.05 0.373 0.365 8
0.144 0.374 0.712 9
0.216 0.391 0.867 7
0.261 0.428 0.888 10
0.296 0.49 0.845 8
0.281 0.584 0.766 8
0.253 0.526 0.689 9
0.224 0.591 0.605 8
0.209 0.599 0.547 9
0.159 0.588 0.516 8
0.064 0.556 0.481 8
-0.043 0.516 0.436 9
-0.136 0.486 0.368 8
-0.122 0.438 0.331 9
-0.167 0.416 0.244 6
-0.169 0.394 0.183 10
-0.136 0.375 0.157 9
-0.078 0.38 0.096 8
0.015 0.39 -0.099 8
0.014 0.351 -0.089 9
0.138 0.316 -0.08 8
0.255 0.251 -0.752 9
0.329 0.197 -0.85 8
0.369 0.144 -0.705 8
0.413 0.068 -0.505 9
0.453 -0.046 -0.249 8
0.408 -0.041 -0.224 7
0.385 -0.185 0.109 10
0.297 -0.308 0.389 8
0.217 -0.41 0.591 9
0.162 -0.559 0.731 8
0.096 -0.734 0.771 9
-0.005 -0.863 0.742 8
-0.005 -0.777 0.668 8
-0.081 -0.845 0.586 9
-0.052 -0.889 0.346 8
0.011 -0.893 0.027 8
0.037 -0.844 -0.147 9
0.046 -0.776 -0.202 7
0.067 -0.669 -0.149 10
0.061 -0.602 -0.134 8
0.095 -0.535 -0.018 8
0.189 -0.555 0.043 9
0.349 -0.555 0.028 8
0.51 -0.472 -0.084 9
0.62 -0.366 -0.147 8
0.667 -0.308 -0.045 8
0.6 -0.277 -0.041 9
0.611 -0.238 0.134 8
0.542 -0.152 0.306 9
0.359 -0.024 0.549 6
0.14 0.107 0.725 10
-0.05 0.232 0.647 9
-0.217 0.339 0.486 8
-0.196 0.305 0.437 9
-0.305 0.35 0.288 8
-0.368 0.361 0.114 8
-0.398 0.378 -0.023 9
-0.394 0.358 -0.091 8
-0.378 0.28 -0.114 9
-0.333 0.184 -0.113 8
-0.3 0.166 -0.102 8
-0.238 0.077 -0.085 7
-0.178 -0.038 -0.018 10
-0.089 -0.115 0.03 9
0.051 -0.163 0.004 8
0.194 -0.248 -0.036 8
0.175 -0.223 -0.033 9
0.285 -0.286 -0.087 8
0.292 -0.268 -0.167 8
0.162 -0.181 -0.213 9
0.01 -0.109 -0.164 8
-0.073 -0.086 -0.085 9
-0.073 -0.108 -0.041 8
-0.066 -0.097 -0.037 7
0.03 -0.131 -0.022 10
0.198 -0.146 -0.03 8
0.384 -0.156 -0.058 9
0.529 -0.155 -0.082 8
0.583 -0.099 -0.083 8
0.546 0.029 -0.061 9
0.491 0.026 -0.055 8
0.371 0.199 -0.021 9
0.207 0.342 0.01 8
0.065 0.422 0.088 8
-0.04 0.452 0.243 9
-0.13 0.45 0.429 6
-0.205 0.427 0.574 11
-0.185 0.385 0.517 8
-0.232 0.354 0.579 8
-0.258 0.319 0.59 9
-0.259 0.277 0.544 8
-0.219 0.232 0.356 9
-0.18 0.204 0.062 8
-0.164 0.195 -0.177 8
-0.148 0.176 -0.159 9
-0.125 0.177 -0.318 8
-0.083 0.174 -0.441 8
-0.032 0.154 -0.469 7
-0.012 0.116 -0.407 10
-0.013 0.067 -0.304 9
0.004 -0.025 -0.195 8
0.003 -0.023 -0.175 8
0.042 -0.172 -0.069 9
0.052 -0.284 0.002 8
-0.008 -0.29 -0.009 9
-0.098 -0.241 -0.049 8
-0.164 -0.226 -0.067 8
-0.197 -0.212 -0.076 9
-0.177 -0.191 -0.068 8
-0.208 -0.12 -0.086 7
-0.216 -0.058 -0.09 10
-0.186 -0.048 -0.091 8
-0.112 -0.084 -0.096 9
0.01 -0.143 -0.097 8
0.123 -0.185 -0.112 8
0.111 -0.167 -0.101 9
0.138 -0.182 -0.118 8
0.072 -0.16 -0.135 9
-0.03 -0.105 -0.158 8
-0.122 -0.031 -0.184 8
-0.179 0.014 -0.238 9
-0.161 0.013 -0.214 7
-0.163 0.005 -0.291 10
-0.124 -0.039 -0.366 8
-0.062 -0.08 -0.403 8
-0.011 -0.107 -0.384 9
0.0 -0.101 -0.305 8
-0.02 -0.064 -0.163 9
-0.018 -0.057 -0.147 8
-0.053 -0.034 0.019 8
-0.081 -0.004 0.152 9
-0.089 0.057 0.217 8
-0.055 0.082 0.233 9
0.002 0.091 0.226 6
0.06 0.046 0.152 10
0.054 0.041 0.136 9
0.141 0.006 0.01 8
0.193 0.071 -0.053 9
0.138 0.151 -0.086 8
0.039 0.215 -0.104 8
-0.05 0.264 -0.047 9
-0.123 0.295 0.032 8
-0.11 0.265 0.029 9
-0.154 0.263 0.082 8
-0.165 0.245 0.101 8
-0.14 0.22 -0.029 7
-0.067 0.131 -0.184 10
0.012 0.009 -0.193 8
0.009 0.009 -0.184 9
0.008 0.008 -0.166 8
-0.066 0.109 -0.179 9
-0.111 0.171 -0.171 8
-0.088 0.167 -0.092 8
-0.037 0.141 0.06 9
-0.002 0.122 0.197 8
0.028 0.102 0.29 9
0.026 0.092 0.261 8
0.059 0.066 0.335 7
0.064 0.055 0.329 10
0.067 0.053 0.245 8
0.126 -0.014 0.131 9
0.205 -0.149 -0.001 8
0.198 -0.243 -0.123 8
0.178 -0.219 -0.11 9
0.068 -0.186 -0.202 8
-0.07 -0.05 -0.276 9
-0.178 0.081 -0.324 8
-0.227 0.146 -0.313 8
-0.22 0.164 -0.253 9
-0.198 0.148 -0.227 6
-0.169 0.148 -0.126 10
-0.118 0.123 -0.006 9
-0.056 0.073 0.068 8
0.001 0.032 0.09 9
0.026 0.019 0.077 8
0.016 0.041 0.071 8
0.014 0.037 0.064 9
-0.008 0.066 0.078 8
-0.024 0.069 0.075 9
-0.03 0.057 0.043 8
-0.045 0.056 -0.006 8
-0.084 0.074 0.005 7
-0.107 0.076 0.092 10
-0.096 0.069 0.083 9
-0.055 0.02 0.132 8
0.022 -0.057 0.078 8
0.078 -0.093 -0.024 9
0.078 -0.085 -0.063 8
0.046 -0.082 -0.022 9
0.022 -0.084 0.0 8
0.019 -0.076 0.0 8
0.006 -0.071 -0.09 9
0.0 -0.054 -0.254 8
-0.007 -0.044 -0.361 7
-0.028 -0.033 -0.327 10
-0.076 0.011 -0.193 8
-0.15 0.065 -0.016 9
-0.135 0.059 -0.014 8
-0.181 0.072 0.15 8
-0.142 0.027 0.226 9
-0.065 -0.039 0.205 8
-0.017 -0.081 0.136 9
0.003 -0.115 0.05 8
0.013 -0.135 -0.072 8
0.011 -0.121 -0.064 9
0.002 -0.084 -0.193 7
-0.025 -0.012 -0.229 10
-0.058 0.05 -0.191 8
-0.088 0.097 -0.154 8
-0.117 0.128 -0.097 9
-0.15 0.141 0.001 8
-0.135 0.127 0.001 9
-0.137 0.121 0.116 8
-0.093 0.103 0.179 8
-0.029 0.077 0.161 9
0.032 0.042 0.091 8
0.081 0.009 -0.007 9
0.073 0.008 -0.006 6
0.106 -0.039 -0.116 10
0.11 -0.065 -0.187 9
0.062 -0.026 -0.177 8
-0.019 0.035 -0.117 9
-0.084 0.071 -0.072 8
-0.102 0.074 -0.047 8
-0.092 0.067 -0.042 9
-0.076 0.06 -0.039 8
-0.036 0.053 -0.041 8
0.021 0.036 0.011 9
0.061 -0.019 0.114 8
0.06 -0.094 0.194 7
0.029 -0.117 0.184 10
0.026 -0.105 0.165 8
-0.034 -0.07 0.097 9
-0.113 -0.023 0.038 8
-0.159 0.016 -0.023 9
-0.141 0.024 -0.07 8
-0.071 -0.014 -0.127 8
-0.003 -0.032 -0.184 9
-0.002 -0.029 -0.166 8
0.02 -0.011 -0.216 9
-0.002 0.0 -0.299 8
-0.083 0.013 -0.324 7
-0.196 0.041 -0.266 10
-0.276 0.075 -0.151 8
-0.31 0.083 0.021 9
-0.279 0.075 0.019 8
-0.258 0.065 0.194 8
-0.158 0.038 0.152 9
-0.027 -0.047 -0.066 8
0.079 -0.136 -0.092 8
0.082 -0.121 0.047 9
0.01 -0.038 0.16 8
0.009 -0.034 0.144 9
-0.002 0.023 0.236 6
0.029 0.049 0.298 10
0.067 0.074 0.338 9
0.113 0.103 0.35 8
0.159 0.133 0.334 9
0.188 0.139 0.268 8
0.169 0.125 0.241 8
0.189 0.093 0.069 9
0.205 0.045 -0.202 8
0.199 0.005 -0.438 9
0.14 -0.016 -0.555 8
0.016 -0.021 -0.573 8
0.014 -0.019 -0.516 7
-0.137 -0.008 -0.465 10
# end
#Thu Feb 26 20:17:30 GMT+08:00 20150
