# Supplementary material for: Abnormal Gait Behavior Detection for Elderly Based on Enhanced Wigner-Ville Analysis and Cloud Incremental SVM Learning
Source: Hindawi journal article supplement (doi:10.1155/2016/5869238), 2016-01-01
Supplement: f1 [file 5869238.f1.zip › Supplementary Materials/Original Data/Normal walking/original__6.txt]

# Accelerometer Values
# filename:  original__6.txt
# Saving start time: Thu Feb 26 20:17:35 GMT+08:00 2015

# sensor resolution: 0.0095825195m/s^2
#Sensorvendor: KIONIX, name: KX023 Accelerometer, type: 1,version : 1, range 39.240005

# X value, Y value, Z value, time diff in ms
-0.091 0.07 -0.089 8
-0.095 0.057 -0.093 8
-0.093 0.049 -0.073 9
-0.083 0.044 -0.066 8
-0.068 0.036 -0.03 8
-0.049 0.027 -0.001 9
-0.039 0.02 0.0 8
-0.039 0.011 -0.042 7
-0.044 0.0 -0.111 10
-0.078 0.0 -0.166 8
-0.07 0.0 -0.149 9
-0.126 0.012 -0.166 8
-0.176 0.02 -0.144 9
-0.191 0.029 -0.119 8
-0.176 0.036 -0.111 8
-0.13 0.033 -0.11 9
-0.069 0.027 -0.098 8
-0.062 0.025 -0.088 9
-0.037 0.033 -0.068 8
-0.038 0.047 -0.039 7
-0.032 0.046 -0.009 10
-0.037 0.043 0.005 8
-0.077 0.047 -0.03 9
-0.112 0.051 -0.138 8
-0.101 0.046 -0.124 8
-0.137 0.044 -0.234 9
-0.195 0.045 -0.284 8
-0.248 0.054 -0.283 9
-0.269 0.056 -0.219 8
-0.263 0.051 -0.114 8
-0.24 0.051 -0.066 9
-0.216 0.046 -0.059 6
-0.158 0.044 -0.108 10
-0.076 0.033 -0.206 9
0.005 0.035 -0.276 8
0.081 0.051 -0.293 9
0.146 0.07 -0.267 8
0.203 0.081 -0.203 8
0.182 0.072 -0.183 9
0.212 0.061 -0.082 8
0.203 0.041 0.04 9
0.182 0.013 0.091 8
0.156 -0.011 0.031 8
0.14 -0.01 0.028 7
0.093 -0.006 -0.157 10
0.083 -0.005 -0.141 9
0.049 0.014 -0.176 8
0.025 0.028 -0.167 8
0.019 0.029 -0.132 9
0.025 0.027 -0.108 8
0.022 0.022 -0.104 9
0.0 0.019 -0.081 8
0.0 0.017 -0.073 8
-0.036 0.009 -0.03 9
-0.072 -0.006 -0.002 8
-0.1 -0.022 0.022 7
-0.109 -0.028 0.032 10
-0.108 -0.027 0.008 8
-0.097 -0.025 -0.031 9
-0.093 -0.022 -0.028 8
-0.093 -0.011 -0.079 8
-0.09 0.006 -0.134 9
-0.065 0.016 -0.165 8
-0.035 0.015 -0.141 9
-0.008 0.016 -0.05 8
-0.008 0.015 -0.045 8
-0.009 0.026 0.115 9
-0.047 0.063 0.291 7
-0.089 0.123 0.435 10
-0.132 0.171 0.543 8
-0.181 0.212 0.605 8
-0.222 0.251 0.616 9
-0.2 0.226 0.554 8
-0.209 0.225 0.517 9
-0.175 0.178 0.402 8
-0.132 0.116 0.246 8
-0.104 0.053 0.112 9
-0.109 0.006 -0.004 8
-0.148 -0.01 -0.113 9
-0.133 -0.009 -0.101 6
-0.156 -0.01 -0.227 10
-0.115 -0.023 -0.352 9
-0.011 -0.035 -0.443 8
0.116 -0.023 -0.448 8
0.208 -0.001 -0.323 9
0.268 -0.007 -0.087 8
0.241 -0.007 -0.078 9
0.289 -0.055 0.195 8
0.31 -0.121 0.398 8
0.292 -0.168 0.485 9
0.253 -0.19 0.492 8
0.21 -0.224 0.464 7
0.147 -0.286 0.436 10
0.133 -0.258 0.392 8
0.044 -0.333 0.382 9
-0.043 -0.391 0.382 8
-0.08 -0.413 0.357 9
-0.054 -0.419 0.306 8
0.015 -0.434 0.254 8
0.101 -0.435 0.216 9
0.091 -0.391 0.194 8
0.176 -0.381 0.16 8
0.275 -0.362 0.119 9
0.393 -0.334 0.078 7
0.522 -0.323 0.031 10
0.629 -0.317 -0.018 8
0.657 -0.311 -0.096 8
0.591 -0.28 -0.087 9
0.539 -0.267 -0.175 8
0.429 -0.236 -0.207 9
0.28 -0.211 -0.137 8
0.128 -0.184 -0.002 8
0.001 -0.131 0.103 9
-0.093 -0.039 0.16 8
-0.084 -0.035 0.144 9
-0.134 0.061 0.165 6
-0.136 0.126 0.15 10
-0.112 0.18 0.087 9
-0.086 0.243 -0.027 8
-0.061 0.266 -0.176 9
-0.025 0.225 -0.322 8
-0.022 0.203 -0.29 8
0.005 0.129 -0.391 9
-0.012 0.035 -0.403 8
-0.061 -0.013 -0.319 9
-0.108 0.036 -0.178 8
-0.122 0.055 -0.11 8
-0.109 0.049 -0.099 7
-0.064 -0.011 -0.145 10
0.0 -0.064 -0.239 9
0.07 -0.112 -0.34 8
0.147 -0.149 -0.363 8
0.148 -0.133 -0.275 9
0.059 -0.099 -0.209 8
0.053 -0.089 -0.188 8
-0.027 -0.085 -0.204 9
-0.083 -0.056 -0.234 8
-0.117 0.001 -0.255 9
-0.134 0.04 -0.272 8
-0.135 0.071 -0.302 7
-0.103 0.105 -0.307 10
-0.093 0.094 -0.277 8
-0.041 0.125 -0.261 9
0.038 0.135 -0.229 8
0.126 0.106 -0.181 8
0.181 0.1 -0.121 9
0.179 0.147 -0.037 8
0.138 0.201 0.057 9
0.124 0.181 0.052 8
0.078 0.233 0.05 8
0.022 0.271 -0.036 9
-0.021 0.295 -0.094 6
-0.035 0.315 -0.105 11
-0.06 0.343 -0.087 8
-0.094 0.376 -0.026 8
-0.085 0.338 -0.024 9
-0.096 0.364 0.12 8
-0.092 0.394 0.318 9
-0.087 0.413 0.494 8
-0.09 0.416 0.602 8
-0.09 0.402 0.661 9
-0.068 0.368 0.683 8
-0.061 0.331 0.615 8
-0.016 0.281 0.608 7
0.052 0.223 0.637 10
0.155 0.179 0.678 9
0.247 0.153 0.671 8
0.286 0.152 0.638 8
0.265 0.171 0.564 9
0.238 0.154 0.508 8
0.166 0.178 0.363 9
0.054 0.183 0.207 8
-0.079 0.171 0.101 8
-0.21 0.139 0.029 9
-0.315 0.04 -0.033 8
-0.284 0.036 -0.029 7
-0.371 -0.097 -0.144 10
-0.425 -0.204 -0.302 8
-0.456 -0.271 -0.344 9
-0.569 -0.314 -0.197 8
-0.736 -0.374 0.07 9
-0.822 -0.474 0.46 8
-0.739 -0.588 0.798 8
-0.665 -0.53 0.719 9
-0.516 -0.636 0.816 8
-0.181 -0.705 0.624 8
0.101 -0.733 0.24 9
0.295 -0.734 -0.073 7
0.365 -0.7 -0.253 10
0.329 -0.63 -0.228 8
0.223 -0.553 -0.205 8
-0.045 -0.436 -0.294 9
-0.356 -0.32 -0.236 8
-0.536 -0.228 -0.191 9
-0.502 -0.156 -0.196 8
-0.298 -0.09 -0.281 8
-0.268 -0.081 -0.253 9
-0.052 -0.006 -0.329 8
0.077 0.094 -0.267 9
0.132 0.188 -0.087 6
0.172 0.225 0.189 10
0.237 0.176 0.527 9
0.27 0.073 0.751 8
0.243 0.065 0.676 9
0.222 -0.027 0.655 8
0.193 -0.103 0.352 8
0.176 -0.164 -0.08 9
0.147 -0.2 -0.525 8
0.064 -0.22 -0.922 9
-0.057 -0.239 -1.189 8
-0.051 -0.215 -1.07 8
-0.171 -0.234 -1.176 7
-0.272 -0.253 -1.123 10
-0.313 -0.269 -0.983 8
-0.297 -0.285 -0.796 9
-0.269 -0.287 -0.601 8
-0.217 -0.273 -0.366 9
-0.196 -0.245 -0.33 8
-0.115 -0.23 -0.07 8
-0.052 -0.207 0.109 9
-0.009 -0.167 0.149 8
0.029 -0.122 0.05 9
0.047 -0.081 -0.098 8
0.042 -0.073 -0.088 7
0.034 -0.028 -0.198 10
0.01 0.034 -0.231 8
-0.027 0.113 -0.196 9
-0.077 0.216 -0.148 8
-0.091 0.353 -0.09 8
-0.054 0.476 -0.007 9
-0.012 0.558 0.07 8
-0.01 0.502 0.063 9
0.032 0.558 0.109 8
0.094 0.59 0.148 8
0.144 0.626 0.22 9
0.164 0.689 0.323 6
0.178 0.768 0.41 10
0.166 0.836 0.45 9
0.15 0.753 0.405 8
0.129 0.798 0.436 9
0.121 0.822 0.571 8
0.113 0.807 0.804 8
0.109 0.749 0.997 9
0.074 0.694 1.072 8
0.044 0.644 0.939 9
0.04 0.579 0.845 8
0.07 0.517 0.494 8
0.143 0.448 0.095 7
0.213 0.402 -0.238 10
0.253 0.373 -0.542 9
0.315 0.341 -0.757 8
0.421 0.287 -0.825 8
0.379 0.258 -0.742 9
0.473 0.168 -0.678 8
0.53 0.059 -0.509 9
0.554 -0.059 -0.27 8
0.507 -0.219 -0.004 8
0.37 -0.383 0.275 9
0.333 -0.345 0.247 8
0.124 -0.5 0.508 7
-0.109 -0.689 0.763 10
-0.349 -0.87 0.999 8
-0.569 -0.975 1.117 9
-0.63 -1.017 1.063 8
-0.465 -1.039 0.857 8
-0.418 -0.935 0.771 9
-0.16 -0.96 0.441 8
0.049 -0.939 0.034 9
0.177 -0.877 -0.386 8
0.228 -0.786 -0.795 8
0.241 -0.679 -1.047 9
0.217 -0.611 -0.942 7
0.228 -0.494 -1.003 10
0.273 -0.383 -0.864 8
0.391 -0.306 -0.546 8
0.521 -0.23 -0.207 9
0.607 -0.155 0.09 8
0.658 -0.106 0.323 9
0.644 -0.072 0.429 8
0.58 -0.065 0.386 8
0.455 -0.037 0.38 9
0.232 -0.014 0.331 8
-0.04 0.009 0.222 9
-0.321 0.028 0.074 6
-0.556 0.028 -0.041 10
-0.661 0.001 -0.253 9
-0.595 0.0 -0.227 8
-0.521 -0.052 -0.542 9
-0.324 -0.133 -0.834 8
-0.085 -0.209 -1.054 8
0.109 -0.246 -1.115 9
0.209 -0.247 -0.974 8
0.224 -0.229 -0.762 8
0.202 -0.206 -0.686 9
0.156 -0.165 -0.543 8
0.097 -0.096 -0.445 7
0.077 -0.022 -0.36 10
0.063 0.046 -0.265 8
0.051 0.125 -0.093 9
0.072 0.183 0.133 8
0.065 0.165 0.12 9
0.126 0.181 0.299 8
0.213 0.188 0.38 8
0.293 0.179 0.362 9
0.356 0.172 0.231 8
0.385 0.18 0.018 9
0.355 0.218 -0.16 8
0.32 0.196 -0.144 7
0.242 0.251 -0.239 10
0.14 0.299 -0.278 8
0.053 0.351 -0.278 9
-0.011 0.388 -0.233 8
-0.06 0.392 -0.186 8
-0.083 0.389 -0.166 9
-0.075 0.35 -0.15 8
-0.084 0.352 -0.156 8
-0.083 0.356 -0.173 9
-0.063 0.361 -0.176 8
-0.041 0.365 -0.129 9
-0.037 0.328 -0.116 6
-0.02 0.41 0.252 10
-0.018 0.369 0.227 9
-0.046 0.421 0.459 8
-0.102 0.482 0.673 9
-0.161 0.521 0.883 8
-0.167 0.53 1.036 8
-0.115 0.529 1.084 9
-0.103 0.516 1.03 8
-0.093 0.465 0.927 9
0.007 0.418 0.759 8
0.026 0.336 0.48 8
0.004 0.262 0.232 7
-0.086 0.224 0.05 10
-0.205 0.222 -0.133 9
-0.184 0.199 -0.12 8
-0.27 0.198 -0.365 8
-0.32 0.194 -0.631 9
-0.391 0.219 -0.839 8
-0.505 0.232 -0.94 9
-0.646 0.208 -0.838 8
-0.8 0.168 -0.464 8
-0.72 0.151 -0.418 9
-0.833 0.12 0.253 8
-0.87 0.053 1.116 7
-0.848 -0.087 1.883 10
-0.767 -0.264 2.299 8
-0.536 -0.456 2.353 9
-0.196 -0.671 2.099 8
-0.176 -0.604 1.889 8
0.114 -0.794 1.373 9
0.305 -0.911 0.734 8
0.374 -0.963 0.065 9
0.327 -0.948 -0.526 8
0.208 -0.896 -0.979 8
0.063 -0.837 -1.302 9
0.057 -0.753 -1.172 7
-0.073 -0.702 -1.306 10
-0.208 -0.655 -1.272 8
-0.368 -0.602 -1.12 8
-0.492 -0.529 -0.86 9
-0.537 -0.441 -0.551 8
-0.528 -0.354 -0.283 9
-0.475 -0.319 -0.254 8
-0.437 -0.226 -0.077 8
-0.359 -0.124 0.032 9
-0.189 -0.049 0.147 8
0.055 -0.036 0.289 8
0.274 -0.038 0.437 7
0.388 -0.031 0.502 10
0.349 -0.028 0.451 9
0.406 -0.066 0.388 8
0.429 -0.124 0.212 8
0.375 -0.136 -0.025 9
0.25 -0.116 -0.349 8
0.113 -0.096 -0.703 9
-0.004 -0.064 -0.96 8
-0.003 -0.057 -0.864 8
-0.127 -0.005 -0.99 9
-0.207 0.026 -0.947 8
-0.209 0.039 -0.809 7
-0.177 0.066 -0.644 10
-0.113 0.089 -0.439 8
0.0 0.092 -0.205 9
0.0 0.083 -0.184 8
0.121 0.096 0.03 9
0.209 0.118 0.215 8
0.247 0.137 0.339 8
0.23 0.154 0.373 9
0.156 0.185 0.305 8
0.066 0.214 0.176 9
0.059 0.193 0.158 8
-0.007 0.195 0.032 7
-0.035 0.226 -0.109 10
-0.05 0.334 -0.25 8
-0.057 0.42 -0.314 8
-0.036 0.441 -0.299 9
0.008 0.478 -0.222 8
0.007 0.43 -0.199 9
0.091 0.466 -0.025 8
0.196 0.426 0.163 8
0.269 0.354 0.222 9
0.295 0.327 0.174 8
0.245 0.363 0.118 9
0.22 0.327 0.107 6
0.077 0.391 0.13 10
-0.107 0.46 0.24 9
-0.203 0.493 0.368 8
-0.165 0.405 0.512 9
-0.047 0.255 0.626 8
0.089 0.144 0.636 8
0.169 0.106 0.531 9
0.152 0.095 0.478 8
0.18 0.13 0.307 9
0.185 0.203 0.161 8
0.171 0.29 0.064 8
0.136 0.386 -0.044 7
0.09 0.493 -0.226 10
0.081 0.444 -0.203 9
0.084 0.52 -0.183 8
0.193 0.469 -0.397 8
0.385 0.3 -0.264 9
0.54 0.088 -0.102 8
0.57 -0.095 0.042 8
0.495 -0.225 0.205 9
0.445 -0.202 0.185 8
0.272 -0.29 0.499 9
0.058 -0.333 0.835 8
-0.127 -0.374 0.99 7
-0.262 -0.472 0.965 10
-0.327 -0.595 0.74 8
-0.333 -0.685 0.349 9
-0.3 -0.617 0.314 8
-0.264 -0.656 -0.02 8
-0.211 -0.668 -0.188 9
-0.176 -0.692 -0.247 8
-0.147 -0.713 -0.245 9
-0.108 -0.718 -0.163 8
-0.046 -0.724 -0.094 8
-0.042 -0.651 -0.085 9
0.027 -0.651 -0.09 6
0.107 -0.631 -0.127 11
0.221 -0.6 -0.187 8
0.329 -0.537 -0.206 8
0.332 -0.388 -0.185 9
0.269 -0.237 -0.154 8
0.242 -0.214 -0.138 8
0.23 -0.135 -0.094 9
0.264 -0.043 -0.045 8
0.295 0.055 0.015 9
0.279 0.093 0.13 8
0.208 0.071 0.275 8
0.187 0.063 0.247 7
0.115 0.027 0.362 10
0.05 -0.021 0.416 9
-0.023 -0.064 0.452 8
-0.071 -0.103 0.469 8
-0.073 -0.147 0.347 9
-0.016 -0.17 0.084 8
0.079 -0.17 -0.145 9
0.071 -0.153 -0.13 8
0.141 -0.145 -0.246 8
0.17 -0.119 -0.3 9
0.146 -0.064 -0.342 8
0.036 0.029 -0.351 7
-0.146 0.221 -0.304 10
-0.351 0.475 -0.237 8
-0.316 0.427 -0.213 9
-0.558 0.612 -0.166 8
-0.73 0.681 -0.115 8
-0.762 0.657 0.045 9
-0.744 0.555 0.237 8
-0.633 0.406 0.254 9
-0.448 0.3 0.134 8
-0.403 0.27 0.12 8
-0.257 0.24 -0.017 9
-0.108 0.187 -0.12 7
0.048 0.067 -0.169 10
0.125 -0.041 -0.154 8
0.081 -0.044 0.013 8
0.073 0.034 0.324 9
0.066 0.031 0.292 8
-0.187 0.074 0.513 9
-0.189 0.017 0.408 8
-0.008 -0.109 0.079 8
0.303 -0.234 -0.219 9
0.639 -0.336 -0.377 8
0.575 -0.303 -0.339 9
0.813 -0.369 -0.322 6
0.835 -0.406 -0.117 10
0.644 -0.413 0.308 9
0.381 -0.391 0.84 8
0.194 -0.33 1.214 9
0.106 -0.24 1.299 8
0.095 -0.216 1.169 8
0.04 -0.141 0.975 9
-0.024 -0.054 0.603 8
-0.099 0.118 0.135 9
-0.171 0.306 -0.316 8
-0.201 0.404 -0.599 8
-0.181 0.363 -0.539 7
-0.234 0.331 -0.761 10
-0.274 0.239 -0.979 8
-0.256 0.169 -1.083 9
-0.266 0.089 -0.973 8
-0.275 0.001 -0.705 9
-0.255 -0.055 -0.456 8
-0.201 -0.066 -0.299 8
-0.18 -0.06 -0.269 9
-0.074 -0.062 -0.187 8
0.054 -0.087 -0.149 9
0.164 -0.099 -0.139 8
0.227 -0.079 -0.138 7
0.245 -0.047 -0.13 10
0.217 -0.041 -0.115 8
0.195 -0.037 -0.103 9
0.17 -0.081 -0.08 8
0.153 -0.155 -0.06 8
0.099 -0.208 -0.055 9
0.017 -0.202 -0.057 8
-0.109 -0.153 -0.061 9
-0.258 -0.082 -0.087 8
-0.232 -0.074 -0.078 8
-0.341 0.014 -0.159 9
-0.396 0.11 -0.297 6
-0.402 0.21 -0.488 10
-0.355 0.298 -0.631 9
-0.293 0.355 -0.614 8
-0.25 0.364 -0.42 9
-0.225 0.327 -0.378 8
-0.215 0.324 -0.111 8
-0.2 0.323 0.091 9
-0.159 0.302 0.197 8
-0.113 0.282 0.221 9
-0.079 0.288 0.211 8
-0.049 0.29 0.202 8
-0.044 0.261 0.182 7
-0.011 0.236 0.179 10
0.017 0.212 0.17 9
0.032 0.182 0.155 8
0.058 0.135 0.119 8
0.112 0.076 0.074 9
0.164 -0.011 0.055 8
0.148 -0.01 0.049 9
0.171 -0.095 0.06 8
0.176 -0.117 0.066 8
0.177 -0.082 0.026 9
0.185 -0.047 -0.032 8
0.166 -0.042 -0.028 7
0.183 -0.061 -0.088 10
0.165 -0.055 -0.079 8
0.194 -0.044 -0.053 9
0.184 -0.011 -0.01 8
0.189 -0.022 0.034 8
0.23 -0.073 0.065 9
0.294 -0.119 -0.002 8
0.264 -0.107 -0.001 9
0.335 -0.133 -0.097 8
0.355 -0.184 -0.078 8
0.225 -0.155 -0.004 9
0.013 0.011 0.034 7
-0.122 0.137 0.018 10
-0.157 0.168 0.004 8
-0.141 0.151 0.004 8
-0.107 0.14 0.031 9
-0.033 0.135 0.071 8
0.055 0.131 0.094 9
0.13 0.123 0.103 8
0.18 0.109 0.094 8
0.204 0.064 0.055 9
0.184 0.058 0.05 8
0.158 -0.018 -0.027 9
0.068 -0.036 -0.12 6
-0.056 0.037 -0.201 10
-0.191 0.116 -0.265 9
-0.28 0.172 -0.286 8
-0.296 0.206 -0.24 8
-0.266 0.185 -0.216 9
-0.28 0.2 -0.088 8
-0.312 0.218 0.06 9
-0.314 0.223 0.152 8
-0.225 0.19 0.208 8
-0.073 0.105 0.234 9
0.037 0.014 0.217 8
0.034 0.012 0.196 7
0.06 -0.009 0.163 10
0.035 0.016 0.128 8
0.006 0.024 0.084 9
-0.012 -0.004 0.0 8
-0.007 -0.06 -0.142 9
0.02 -0.118 -0.324 8
0.018 -0.107 -0.291 8
0.052 -0.135 -0.457 9
0.083 -0.145 -0.48 8
0.101 -0.2 -0.347 9
0.102 -0.269 -0.172 8
0.092 -0.242 -0.155 7
0.136 -0.324 0.149 10
0.122 -0.292 0.134 8
0.127 -0.281 0.219 9
0.087 -0.244 0.261 8
0.044 -0.188 0.273 8
0.016 -0.123 0.249 9
0.003 -0.102 0.197 8
0.003 -0.103 0.13 8
-0.007 -0.092 0.117 9
-0.039 -0.04 0.029 8
-0.076 0.035 -0.041 9
-0.111 0.094 -0.079 6
-0.15 0.141 -0.11 10
-0.177 0.178 -0.075 9
-0.159 0.16 -0.067 8
-0.18 0.158 0.033 9
-0.207 0.132 0.104 8
-0.193 0.134 0.132 8
-0.137 0.114 0.13 9
-0.065 0.052 0.099 8
-0.004 -0.019 0.032 9
-0.004 -0.017 0.028 8
0.0 -0.036 -0.059 8
-0.063 0.027 -0.134 7
-0.166 0.125 -0.175 10
-0.249 0.202 -0.154 9
-0.293 0.229 -0.068 8
-0.292 0.219 0.031 8
-0.263 0.197 0.028 9
-0.222 0.164 0.095 8
-0.148 0.072 0.128 9
-0.036 -0.067 0.12 8
0.073 -0.177 0.088 8
0.133 -0.233 0.07 9
0.151 -0.246 0.049 8
0.136 -0.222 0.044 7
0.139 -0.166 0.002 10
0.135 -0.048 -0.022 8
0.118 0.047 -0.001 9
0.083 0.093 0.043 8
0.04 0.099 0.077 8
0.014 0.077 0.088 9
0.013 0.069 0.079 8
0.014 0.025 0.076 9
0.039 -0.064 0.056 8
0.079 -0.153 0.004 8
0.099 -0.175 -0.036 9
0.062 -0.141 -0.034 6
-0.01 -0.045 -0.012 11
-0.009 -0.041 -0.011 8
-0.057 0.08 0.0 8
-0.059 0.139 -0.002 9
-0.038 0.146 0.006 8
-0.021 0.159 0.034 9
-0.026 0.151 0.064 8
-0.042 0.118 0.08 8
-0.038 0.106 0.072 9
-0.047 0.09 0.075 8
-0.057 0.093 0.068 8
-0.074 0.108 0.045 7
-0.08 0.123 0.002 10
-0.066 0.118 -0.04 9
-0.06 0.106 -0.036 8
-0.027 0.087 -0.032 8
0.016 0.049 -0.037 9
0.073 -0.01 -0.026 8
0.124 -0.065 -0.009 9
0.144 -0.078 0.008 8
0.143 -0.062 0.024 8
0.128 -0.056 0.022 9
0.103 -0.033 0.038 8
0.059 -0.014 -0.035 7
0.036 -0.052 -0.19 10
0.026 -0.152 -0.191 8
-0.033 -0.182 -0.068 9
-0.109 -0.075 0.006 8
-0.098 -0.067 0.005 9
-0.128 0.049 0.048 8
-0.105 0.101 0.082 8
-0.019 0.123 0.14 9
0.088 0.094 0.207 8
0.172 0.043 0.233 9
0.199 0.026 0.192 8
0.179 0.023 0.173 7
0.167 0.024 0.088 10
0.139 0.0 -0.022 8
0.091 -0.054 -0.162 9
0.012 -0.102 -0.283 8
-0.102 -0.093 -0.359 8
-0.21 -0.045 -0.381 9
# end
#Thu Feb 26 20:17:41 GMT+08:00 20159
