# Supplementary material for: Abnormal Gait Behavior Detection for Elderly Based on Enhanced Wigner-Ville Analysis and Cloud Incremental SVM Learning
Source: Hindawi journal article supplement (doi:10.1155/2016/5869238), 2016-01-01
Supplement: f1 [file 5869238.f1.zip › Supplementary Materials/Original Data/Normal walking/original__7.txt]

# Accelerometer Values
# filename:  original__7.txt
# Saving start time: Thu Feb 26 20:17:45 GMT+08:00 2015

# sensor resolution: 0.0095825195m/s^2
#Sensorvendor: KIONIX, name: KX023 Accelerometer, type: 1,version : 1, range 39.240005

# X value, Y value, Z value, time diff in ms
-0.089 -0.013 -0.01 7
-0.091 -0.011 -0.003 10
-0.062 -0.023 0.009 9
-0.014 -0.072 0.019 8
0.025 -0.137 0.021 8
0.051 -0.159 0.019 9
0.051 -0.117 0.013 8
0.021 -0.072 0.001 8
0.019 -0.065 0.001 9
-0.028 -0.042 -0.016 8
-0.07 -0.022 -0.048 9
-0.081 -0.014 -0.069 8
-0.07 -0.015 -0.051 7
-0.041 -0.022 -0.023 10
-0.002 -0.037 -0.024 8
-0.002 -0.033 -0.022 9
0.019 -0.042 -0.033 8
-0.003 -0.008 -0.011 8
-0.066 0.033 0.027 9
-0.12 0.038 0.047 8
-0.128 0.041 0.052 9
-0.111 0.046 0.054 8
-0.1 0.041 0.049 8
-0.083 0.044 0.05 9
-0.063 0.036 0.042 6
-0.028 0.016 0.031 11
0.014 -0.003 0.022 8
0.041 -0.008 0.005 8
0.041 0.001 -0.007 9
0.037 0.001 -0.006 8
0.022 0.018 -0.003 8
0.004 0.031 0.001 9
0.0 0.011 0.002 8
-0.005 -0.02 -0.001 9
-0.024 -0.048 -0.018 8
-0.04 -0.079 -0.055 8
-0.036 -0.071 -0.05 7
-0.028 -0.1 -0.087 10
0.0 -0.116 -0.088 9
0.012 -0.116 -0.058 8
0.005 -0.105 -0.025 8
0.008 -0.075 -0.003 9
0.042 -0.057 0.006 8
0.038 -0.052 0.006 9
0.073 -0.044 0.019 8
0.084 -0.028 0.027 8
0.088 -0.012 0.026 9
0.094 0.005 0.031 8
0.084 0.005 0.028 7
0.102 0.031 0.037 10
0.091 0.028 0.033 8
0.112 0.014 0.018 9
0.126 0.013 -0.013 8
0.118 0.031 -0.044 8
0.097 0.062 -0.057 9
0.092 0.086 -0.054 8
0.082 0.089 -0.035 9
0.074 0.08 -0.031 8
0.097 0.08 -0.009 8
0.075 0.095 0.008 9
0.044 0.13 0.022 7
0.019 0.149 0.029 10
0.019 0.138 0.021 8
0.017 0.124 0.019 8
0.035 0.111 0.017 9
0.054 0.093 -0.078 8
0.065 0.068 -0.149 9
0.062 0.054 -0.2 8
0.046 0.044 -0.203 8
0.016 0.031 -0.141 9
0.014 0.028 -0.127 8
-0.031 0.025 -0.063 9
-0.063 0.039 -0.055 6
-0.051 0.028 -0.086 10
-0.019 -0.013 -0.142 9
0.0 -0.055 -0.201 8
-0.009 -0.063 -0.205 9
-0.008 -0.056 -0.185 8
-0.044 -0.055 -0.12 8
-0.092 -0.056 -0.009 9
-0.149 -0.032 0.101 8
-0.196 -0.011 0.163 9
-0.213 -0.008 0.183 8
-0.2 -0.002 0.175 8
-0.18 -0.002 0.157 7
-0.16 0.007 0.107 10
-0.158 0.003 0.023 8
-0.167 -0.04 -0.07 9
-0.18 -0.078 -0.188 8
-0.189 -0.094 -0.325 9
-0.206 -0.109 -0.441 8
-0.186 -0.098 -0.397 8
-0.2 -0.091 -0.472 9
-0.215 -0.046 -0.491 8
-0.233 0.014 -0.454 9
-0.217 0.062 -0.316 8
-0.197 0.105 -0.057 7
-0.191 0.137 0.194 10
-0.172 0.123 0.174 8
-0.183 0.134 0.319 9
-0.213 0.122 0.376 8
-0.211 0.092 0.352 8
-0.162 0.067 0.199 9
-0.1 0.069 -0.087 8
-0.029 0.09 -0.361 8
-0.026 0.081 -0.325 9
0.064 0.101 -0.484 8
0.136 0.118 -0.542 9
0.191 0.134 -0.508 6
0.242 0.148 -0.38 10
0.268 0.151 -0.158 9
0.262 0.147 0.033 8
0.235 0.133 0.03 9
0.226 0.13 0.091 8
0.23 0.103 0.035 8
0.224 0.078 -0.081 9
0.183 0.065 -0.155 8
0.114 0.058 -0.129 9
0.02 0.053 -0.027 8
0.018 0.048 -0.024 8
-0.089 0.041 0.091 7
-0.174 0.039 0.176 10
-0.212 0.035 0.244 9
-0.195 0.018 0.293 8
-0.125 0.01 0.276 8
-0.04 0.001 0.199 9
-0.036 0.001 0.179 8
0.019 -0.015 0.121 9
0.047 -0.028 0.1 8
0.05 -0.032 0.082 8
0.054 -0.028 0.044 9
0.073 -0.022 -0.021 8
0.066 -0.02 -0.018 7
0.091 -0.008 -0.117 10
0.105 0.008 -0.219 8
0.114 0.021 -0.281 9
0.107 0.034 -0.263 8
0.068 0.048 -0.129 8
-0.014 0.054 0.071 9
-0.102 0.049 0.234 8
-0.092 0.044 0.21 9
-0.132 0.041 0.302 8
-0.133 0.043 0.34 8
-0.116 0.058 0.35 9
-0.103 0.076 0.343 7
-0.098 0.097 0.317 10
-0.088 0.087 0.286 8
-0.088 0.135 0.257 8
-0.094 0.192 0.25 9
-0.117 0.22 0.235 8
-0.143 0.214 0.22 9
-0.154 0.181 0.199 8
-0.153 0.137 0.144 8
-0.137 0.123 0.129 9
-0.117 0.061 0.005 8
-0.077 -0.018 -0.13 9
-0.002 -0.064 -0.13 6
0.036 -0.094 -0.003 10
0.06 -0.142 0.108 9
0.142 -0.24 0.153 8
0.128 -0.216 0.138 8
0.196 -0.374 0.147 9
0.222 -0.536 0.143 8
0.253 -0.68 0.145 9
0.246 -0.761 0.138 8
0.204 -0.769 0.111 8
0.162 -0.731 0.098 9
0.146 -0.658 0.088 8
0.122 -0.583 0.078 7
0.147 -0.503 0.053 10
0.19 -0.417 0.031 8
0.241 -0.308 0.024 9
0.295 -0.187 0.103 8
0.348 -0.07 0.29 9
0.313 -0.063 0.261 8
0.403 0.026 0.43 8
0.539 0.075 0.485 9
0.65 0.116 0.445 8
0.683 0.156 0.353 9
0.638 0.176 0.278 8
0.574 0.158 0.25 7
0.403 0.189 0.263 10
0.124 0.225 0.339 8
-0.124 0.253 0.37 9
-0.28 0.263 0.273 8
-0.365 0.25 0.075 8
-0.397 0.215 -0.128 9
-0.379 0.152 -0.265 8
-0.341 0.137 -0.238 9
-0.298 0.072 -0.335 8
-0.242 -0.002 -0.426 8
-0.174 -0.106 -0.468 9
-0.132 -0.204 -0.415 6
-0.138 -0.258 -0.311 10
-0.153 -0.278 -0.22 9
-0.138 -0.25 -0.198 8
-0.114 -0.273 -0.138 9
-0.06 -0.294 -0.129 8
-0.015 -0.3 -0.188 8
0.019 -0.298 -0.294 9
0.045 -0.293 -0.374 8
0.057 -0.28 -0.425 9
0.051 -0.252 -0.382 8
0.062 -0.22 -0.418 8
0.074 -0.172 -0.363 7
0.098 -0.135 -0.2 10
0.12 -0.11 -0.013 9
0.127 -0.085 0.1 8
0.119 -0.065 0.132 8
0.107 -0.058 0.118 9
0.067 -0.012 0.114 8
0.0 0.061 0.113 9
-0.038 0.129 0.112 8
-0.032 0.178 0.064 8
0.003 0.259 -0.012 9
0.003 0.233 -0.079 8
0.011 0.21 -0.071 7
-0.028 0.426 -0.106 10
-0.071 0.484 -0.058 8
-0.098 0.509 0.035 9
-0.088 0.508 0.134 8
-0.052 0.486 0.264 8
-0.047 0.437 0.238 9
0.013 0.404 0.387 8
0.109 0.371 0.483 9
0.225 0.336 0.464 8
0.341 0.307 0.347 8
0.389 0.317 0.203 9
0.35 0.285 0.182 6
0.304 0.352 0.1 11
0.212 0.437 0.142 8
0.084 0.502 0.257 8
-0.051 0.527 0.365 9
-0.146 0.503 0.425 8
-0.206 0.423 0.404 9
-0.26 0.294 0.327 8
-0.234 0.264 0.294 8
-0.286 0.101 0.208 9
-0.353 -0.044 0.112 8
-0.445 -0.142 0.007 8
-0.509 -0.228 -0.062 7
-0.487 -0.34 -0.031 10
-0.364 -0.48 0.092 9
-0.328 -0.432 0.083 8
-0.133 -0.579 0.265 8
0.067 -0.709 0.427 9
0.183 -0.794 0.503 8
0.175 -0.818 0.502 9
0.069 -0.801 0.376 8
-0.114 -0.751 0.076 8
-0.103 -0.676 0.068 9
-0.307 -0.616 -0.278 8
-0.436 -0.548 -0.605 7
-0.473 -0.472 -0.92 10
-0.413 -0.405 -1.103 8
-0.285 -0.357 -1.1 9
-0.173 -0.308 -0.886 8
-0.155 -0.277 -0.797 9
-0.084 -0.211 -0.457 8
-0.007 -0.146 -0.132 8
0.092 -0.123 0.191 9
0.164 -0.138 0.506 8
0.191 -0.158 0.607 9
0.192 -0.167 0.419 8
0.173 -0.15 0.377 7
0.17 -0.161 0.104 10
0.161 -0.171 -0.124 8
0.132 -0.168 -0.349 9
0.064 -0.156 -0.566 8
-0.035 -0.138 -0.711 8
-0.032 -0.125 -0.64 9
-0.138 -0.094 -0.675 8
-0.201 -0.054 -0.566 8
-0.198 -0.025 -0.384 9
-0.164 0.006 -0.224 8
-0.098 0.05 -0.088 9
-0.088 0.045 -0.079 6
0.003 0.091 0.035 10
0.068 0.14 0.115 9
0.092 0.192 0.149 8
0.098 0.23 0.161 9
0.086 0.27 0.161 8
0.072 0.304 0.15 8
0.083 0.316 0.12 9
0.075 0.285 0.108 8
0.095 0.319 0.049 9
0.084 0.376 -0.018 8
0.029 0.432 -0.036 8
-0.046 0.48 -0.005 7
-0.128 0.511 0.027 10
-0.207 0.523 0.064 8
-0.186 0.471 0.057 9
-0.216 0.476 0.09 8
-0.146 0.474 0.106 9
0.0 0.459 0.118 8
0.162 0.42 0.174 8
0.296 0.372 0.304 9
0.353 0.332 0.437 8
0.318 0.299 0.394 9
0.285 0.284 0.494 8
0.204 0.29 0.506 7
0.108 0.321 0.338 10
0.028 0.383 0.1 8
-0.024 0.445 -0.052 9
-0.03 0.486 -0.113 8
-0.027 0.438 -0.102 8
0.039 0.444 -0.11 9
0.171 0.367 -0.055 8
0.348 0.22 0.022 9
0.56 0.072 0.122 8
0.714 -0.052 0.339 8
0.665 -0.154 0.584 9
0.599 -0.139 0.526 6
0.383 -0.227 0.65 11
0.111 -0.307 0.665 8
-0.145 -0.387 0.597 8
-0.332 -0.482 0.404 9
-0.385 -0.55 0.064 8
-0.346 -0.495 -0.26 8
-0.264 -0.445 -0.234 9
-0.126 -0.616 -0.462 8
-0.011 -0.64 -0.608 9
0.03 -0.594 -0.589 8
0.005 -0.504 -0.439 8
0.004 -0.454 -0.395 7
-0.044 -0.368 -0.181 10
-0.1 -0.289 0.035 9
-0.162 -0.218 0.182 8
-0.185 -0.17 0.268 8
-0.146 -0.156 0.296 9
-0.079 -0.169 0.276 8
-0.026 -0.197 0.271 9
-0.023 -0.177 0.244 8
-0.007 -0.2 0.29 8
-0.032 -0.207 0.282 9
-0.061 -0.22 0.089 8
-0.064 -0.234 -0.231 7
-0.04 -0.239 -0.6 10
0.005 -0.251 -0.915 8
0.005 -0.225 -0.823 9
0.067 -0.244 -0.977 8
0.126 -0.248 -0.996 8
0.172 -0.235 -0.917 9
0.2 -0.213 -0.776 8
0.203 -0.187 -0.651 9
0.188 -0.159 -0.567 8
0.169 -0.143 -0.511 8
0.133 -0.111 -0.429 9
0.089 -0.073 -0.307 7
0.062 -0.029 -0.151 10
0.05 0.009 0.036 8
0.047 0.049 0.221 8
0.06 0.078 0.327 9
0.054 0.07 0.294 8
0.076 0.081 0.329 9
0.091 0.091 0.318 8
0.077 0.105 0.254 8
0.033 0.134 0.071 9
-0.011 0.196 -0.216 8
-0.051 0.305 -0.438 9
-0.046 0.274 -0.394 6
-0.087 0.409 -0.469 10
-0.12 0.511 -0.434 9
-0.137 0.552 -0.326 8
-0.133 0.556 -0.168 9
-0.113 0.537 -0.031 8
-0.092 0.507 0.042 8
-0.083 0.456 0.038 9
-0.074 0.427 0.107 8
-0.079 0.4 0.222 8
-0.075 0.377 0.359 9
-0.06 0.349 0.526 8
-0.054 0.314 0.473 7
-0.02 0.301 0.856 10
0.044 0.271 0.77 8
0.13 0.305 0.83 9
0.21 0.381 0.79 8
0.25 0.433 0.66 9
0.232 0.457 0.423 8
0.134 0.467 0.167 8
0.121 0.421 0.15 9
-0.055 0.438 -0.03 8
-0.292 0.442 -0.171 9
-0.571 0.411 -0.29 8
-0.805 0.374 -0.298 7
-0.912 0.304 -0.164 10
-0.911 0.159 0.165 8
-0.82 0.143 0.149 9
-0.74 -0.043 0.642 8
-0.539 -0.228 1.166 8
-0.235 -0.433 1.567 9
0.076 -0.66 1.706 8
0.354 -0.845 1.567 9
0.567 -0.937 1.08 8
0.51 -0.843 0.972 8
0.593 -0.861 0.24 9
0.527 -0.819 -0.436 6
0.352 -0.74 -0.879 10
0.123 -0.638 -1.094 9
-0.114 -0.539 -1.11 8
-0.351 -0.459 -1.0 9
-0.316 -0.413 -0.9 8
-0.508 -0.352 -0.743 8
-0.551 -0.303 -0.561 9
-0.437 -0.273 -0.401 8
-0.263 -0.254 -0.262 9
-0.064 -0.248 -0.084 8
0.14 -0.264 0.084 8
0.126 -0.238 0.075 7
0.305 -0.263 0.152 10
0.473 -0.273 0.089 9
0.6 -0.273 -0.049 8
0.64 -0.264 -0.157 8
0.568 -0.236 -0.275 9
0.413 -0.199 -0.425 8
0.372 -0.179 -0.383 9
0.212 -0.138 -0.511 8
0.082 -0.09 -0.574 8
-0.022 -0.041 -0.563 9
-0.102 -0.003 -0.48 8
-0.092 0.015 -0.371 7
-0.147 0.019 -0.281 10
-0.132 0.017 -0.253 8
-0.127 0.018 -0.187 9
-0.114 0.023 -0.123 8
-0.112 0.042 -0.039 8
-0.15 0.086 0.051 9
-0.216 0.141 0.111 8
-0.255 0.197 0.121 9
-0.229 0.177 0.109 8
-0.219 0.238 0.07 8
-0.165 0.298 0.015 9
-0.09 0.346 0.001 7
-0.028 0.384 0.042 10
0.003 0.418 0.1 8
0.002 0.377 0.09 8
-0.003 0.41 0.171 9
-0.036 0.436 0.295 8
-0.067 0.463 0.419 9
-0.066 0.479 0.49 8
-0.034 0.477 0.509 8
0.009 0.474 0.52 9
0.008 0.427 0.468 8
0.06 0.435 0.456 9
0.102 0.431 0.394 6
0.132 0.398 0.296 10
0.156 0.352 0.168 9
0.177 0.306 0.0 8
0.205 0.248 -0.161 9
0.184 0.223 -0.145 8
0.218 0.181 -0.287 8
0.251 0.156 -0.432 9
0.307 0.128 -0.602 8
0.357 0.097 -0.766 8
0.335 0.066 -0.757 9
0.24 0.039 -0.496 8
0.216 0.035 -0.446 7
0.107 0.019 -0.064 10
0.017 0.007 0.428 8
-0.038 -0.021 1.064 9
-0.053 -0.124 1.593 8
0.012 -0.311 1.787 9
0.156 -0.513 1.581 8
0.14 -0.461 1.422 8
0.242 -0.618 0.925 9
0.194 -0.694 0.331 8
0.037 -0.688 -0.178 9
-0.13 -0.632 -0.48 8
-0.117 -0.569 -0.432 7
-0.215 -0.519 -0.683 10
-0.214 -0.479 -0.615 8
-0.125 -0.442 -0.659 9
0.087 -0.427 -0.711 8
0.3 -0.388 -0.825 8
0.359 -0.312 -0.848 9
0.291 -0.237 -0.677 8
0.262 -0.214 -0.609 8
0.106 -0.136 -0.369 9
-0.08 -0.036 -0.186 8
-0.254 0.049 -0.084 9
-0.409 0.123 0.003 6
-0.533 0.229 0.121 10
-0.625 0.347 0.248 9
-0.563 0.313 0.223 8
-0.61 0.394 0.344 9
-0.557 0.42 0.447 8
-0.41 0.389 0.472 8
-0.203 0.314 0.401 9
0.022 0.151 0.296 8
0.198 -0.033 0.125 9
0.178 -0.03 0.113 8
0.259 -0.136 -0.086 8
0.314 -0.216 -0.227 7
0.339 -0.229 -0.377 10
0.284 -0.15 -0.505 9
0.204 -0.076 -0.505 8
0.127 -0.027 -0.401 8
0.115 -0.024 -0.361 9
0.095 0.006 -0.245 8
0.109 0.044 -0.161 8
0.096 0.074 -0.098 9
0.063 0.059 -0.052 8
0.053 0.023 -0.02 9
0.067 -0.013 0.001 8
0.06 -0.011 0.001 7
0.065 0.01 0.016 10
0.044 0.104 0.015 8
0.006 0.194 -0.027 9
-0.041 0.28 -0.112 8
-0.126 0.36 -0.129 8
-0.259 0.413 -0.018 9
-0.233 0.372 -0.016 8
-0.335 0.381 0.291 9
-0.318 0.313 0.7 8
-0.192 0.138 0.959 8
0.001 -0.101 1.01 9
0.001 -0.091 0.909 6
0.552 -0.365 0.445 11
0.497 -0.329 0.401 8
0.664 -0.322 -0.049 8
0.642 -0.23 -0.495 9
0.467 -0.028 -0.757 8
0.282 0.106 -0.708 9
0.137 0.066 -0.521 8
0.124 0.06 -0.469 8
0.017 -0.005 -0.298 9
-0.036 -0.02 -0.198 8
-0.054 -0.022 -0.148 8
-0.06 -0.027 -0.148 7
-0.068 -0.042 -0.183 10
-0.081 -0.077 -0.172 9
-0.073 -0.069 -0.155 8
-0.09 -0.09 -0.097 8
-0.115 -0.057 -0.055 9
-0.147 0.033 -0.023 8
-0.171 0.107 0.01 9
-0.145 0.105 0.027 8
-0.072 0.033 0.016 8
-0.064 0.029 0.014 9
0.017 -0.041 -0.005 8
0.04 -0.099 -0.017 7
-0.002 -0.126 -0.027 10
-0.069 -0.083 -0.068 8
-0.14 -0.001 -0.137 9
-0.19 0.063 -0.209 8
-0.171 0.056 -0.188 9
-0.177 0.068 -0.245 8
-0.157 0.053 -0.256 8
-0.128 0.07 -0.223 9
-0.08 0.095 -0.137 8
-0.036 0.085 -0.018 8
-0.007 0.067 0.061 9
-0.006 0.061 0.054 7
0.001 0.074 0.092 10
-0.007 0.099 0.105 8
-0.023 0.124 0.105 9
-0.047 0.155 0.097 8
-0.071 0.163 0.088 8
-0.072 0.132 0.075 9
-0.064 0.118 0.068 8
-0.028 0.051 0.031 8
0.018 -0.029 -0.048 9
0.067 -0.113 -0.137 8
0.103 -0.158 -0.188 9
0.093 -0.142 -0.184 6
0.048 -0.023 -0.127 10
0.043 -0.021 -0.114 9
-0.01 0.067 -0.023 8
-0.049 0.116 0.054 9
-0.053 0.089 0.092 8
-0.029 0.029 0.105 8
-0.016 0.013 0.097 9
0.0 -0.011 0.044 8
0.0 -0.01 0.039 9
0.051 -0.099 0.0 8
0.105 -0.169 0.023 8
0.128 -0.161 0.06 7
0.088 -0.093 0.078 10
0.04 -0.037 0.076 8
0.036 -0.033 0.069 9
0.003 -0.003 0.066 8
-0.042 0.058 0.072 9
-0.091 0.123 0.079 8
-0.146 0.156 0.073 8
-0.186 0.16 0.057 9
-0.177 0.14 0.043 8
-0.159 0.126 0.039 9
-0.093 0.064 0.027 8
-0.018 0.025 0.004 7
0.026 0.044 -0.021 10
0.06 0.061 -0.1 8
0.099 0.016 -0.116 9
0.111 -0.055 -0.029 8
0.1 -0.05 -0.026 8
0.036 -0.004 0.01 9
-0.052 0.107 0.021 8
-0.088 0.141 0.025 9
-0.071 0.109 0.029 8
-0.036 0.06 0.032 8
-0.01 0.019 0.031 9
-0.009 0.017 0.027 6
0.001 0.018 0.02 10
-0.001 0.045 0.014 9
-0.017 0.07 0.011 8
-0.033 0.101 0.001 9
-0.028 0.102 -0.003 8
-0.018 0.055 0.0 8
-0.016 0.05 0.0 9
-0.018 0.033 -0.025 8
-0.017 0.018 -0.082 9
-0.01 -0.065 -0.129 8
-0.022 -0.116 -0.17 8
-0.07 -0.053 -0.216 7
-0.136 0.045 -0.209 10
-0.123 0.04 -0.188 9
-0.162 0.098 -0.121 8
-0.14 0.116 -0.036 8
-0.064 0.101 0.03 9
0.023 0.039 0.064 8
0.088 -0.022 0.08 9
0.119 -0.049 0.09 8
0.107 -0.044 0.081 8
0.107 -0.044 0.092 9
0.07 -0.003 0.1 8
0.014 0.054 0.102 7
-0.023 0.061 0.093 10
-0.035 0.024 0.077 8
-0.039 -0.001 0.054 9
-0.035 -0.001 0.049 8
-0.035 -0.001 0.009 9
-0.019 0.0 -0.041 8
0.006 0.005 -0.101 8
0.029 0.02 -0.147 9
0.043 0.028 -0.156 8
0.051 0.025 -0.135 8
0.046 0.022 -0.121 9
0.05 0.019 -0.075 7
0.044 0.018 -0.015 10
0.034 0.014 0.028 8
0.025 0.014 0.038 8
0.018 0.025 0.028 9
0.01 0.045 0.033 8
0.009 0.041 0.029 9
0.0 0.044 0.054 8
-0.006 0.029 0.067 8
-0.011 0.028 0.056 9
-0.011 0.035 0.038 8
-0.003 0.028 0.013 9
-0.003 0.025 0.012 6
0.014 0.002 -0.04 10
0.03 -0.01 -0.119 9
0.033 -0.012 -0.149 8
0.015 -0.029 -0.096 9
-0.012 -0.034 -0.03 8
-0.031 0.005 -0.019 8
-0.028 0.005 -0.017 9
-0.042 0.067 -0.033 8
-0.051 0.096 -0.031 8
-0.024 0.07 -0.061 9
0.027 0.027 -0.14 8
0.063 0.023 -0.18 7
0.052 0.047 -0.092 10
0.047 0.042 -0.083 8
-0.011 0.058 0.048 9
-0.062 0.061 0.112 8
-0.072 0.047 0.086 9
-0.052 0.015 -0.017 8
-0.016 -0.043 -0.184 8
0.026 -0.122 -0.382 9
0.023 -0.109 -0.344 8
0.066 -0.189 -0.471 9
0.107 -0.257 -0.48 8
0.135 -0.29 -0.429 7
0.121 -0.236 -0.325 10
0.048 -0.095 -0.175 8
-0.075 0.07 -0.024 9
-0.067 0.063 -0.022 8
-0.212 0.174 0.14 8
-0.302 0.209 0.281 9
-0.295 0.207 0.345 8
-0.204 0.179 0.343 9
-0.073 0.112 0.289 8
0.042 0.013 0.191 8
0.038 0.012 0.172 9
0.1 -0.037 0.093 6
0.09 0.006 0.077 10
0.006 0.08 0.116 9
-0.125 0.138 0.172 8
-0.219 0.168 0.2 9
-0.207 0.169 0.198 8
-0.186 0.152 0.178 8
-0.099 0.137 0.135 9
-0.001 0.103 0.041 8
0.078 0.049 -0.039 9
0.127 0.007 -0.077 8
0.14 -0.003 -0.08 8
0.126 -0.003 -0.072 7
0.088 0.009 -0.049 10
-0.007 0.037 -0.034 9
-0.075 0.063 -0.067 8
-0.037 0.051 -0.175 8
0.06 -0.036 -0.284 9
0.147 -0.166 -0.277 8
0.193 -0.243 -0.205 9
0.174 -0.218 -0.185 8
0.179 -0.253 -0.133 8
0.139 -0.218 -0.037 9
0.036 -0.079 0.061 8
-0.074 0.058 0.08 7
-0.119 0.12 0.059 10
-0.11 0.124 0.028 8
-0.099 0.112 0.025 9
-0.087 0.108 0.007 8
-0.09 0.101 0.03 8
-0.085 0.082 0.068 9
-0.054 0.07 0.098 8
# end
#Thu Feb 26 20:17:51 GMT+08:00 2015.
