# Supplementary material for: Abnormal Gait Behavior Detection for Elderly Based on Enhanced Wigner-Ville Analysis and Cloud Incremental SVM Learning
Source: Hindawi journal article supplement (doi:10.1155/2016/5869238), 2016-01-01
Supplement: f1 [file 5869238.f1.zip › Supplementary Materials/Original Data/Normal walking/original__8.txt]

# Accelerometer Values
# filename:  original__8.txt
# Saving start time: Thu Feb 26 20:17:57 GMT+08:00 2015

# sensor resolution: 0.0095825195m/s^2
#Sensorvendor: KIONIX, name: KX023 Accelerometer, type: 1,version : 1, range 39.240005

# X value, Y value, Z value, time diff in ms
-0.241 0.094 0.065 8
-0.245 0.082 0.057 8
-0.185 0.024 -0.058 9
-0.11 -0.065 -0.195 8
-0.074 -0.108 -0.268 9
-0.067 -0.097 -0.242 6
-0.062 -0.106 -0.258 10
-0.075 -0.119 -0.243 9
-0.096 -0.108 -0.216 8
-0.117 -0.051 -0.205 9
-0.155 0.011 -0.198 8
-0.219 0.058 -0.142 8
-0.197 0.052 -0.128 9
-0.265 0.084 0.0 8
-0.316 0.104 0.157 9
-0.368 0.12 0.275 8
-0.404 0.115 0.31 8
-0.436 0.1 0.274 7
-0.481 0.089 0.175 10
-0.433 0.08 0.157 9
-0.432 0.07 0.0 8
-0.345 0.066 -0.144 8
-0.215 0.086 -0.216 9
-0.088 0.139 -0.233 8
0.052 0.172 -0.218 8
0.223 0.144 -0.178 9
0.201 0.13 -0.16 8
0.352 0.068 -0.086 9
0.443 0.017 0.005 8
0.48 -0.024 0.07 7
0.473 -0.099 0.058 10
0.42 -0.161 -0.025 8
0.321 -0.157 -0.089 9
0.289 -0.142 -0.08 8
0.15 -0.128 -0.091 8
-0.006 -0.103 -0.088 9
-0.125 -0.063 -0.1 8
-0.153 -0.062 -0.114 9
-0.111 -0.069 -0.12 8
-0.044 -0.056 -0.116 8
-0.039 -0.05 -0.104 9
0.007 -0.037 -0.063 6
0.012 -0.042 0.059 10
-0.006 -0.035 0.174 9
-0.041 -0.015 0.177 8
-0.08 0.011 0.108 9
-0.072 0.01 0.012 8
-0.094 0.009 0.011 8
-0.065 0.044 -0.052 9
-0.014 0.038 -0.046 8
0.011 0.052 0.049 9
0.018 0.06 0.189 8
0.007 0.062 0.273 8
0.006 0.056 0.246 7
-0.013 0.075 0.179 10
-0.032 0.092 0.014 9
-0.063 0.112 -0.105 8
-0.119 0.185 -0.165 8
-0.162 0.27 -0.184 9
-0.12 0.304 -0.172 8
-0.108 0.274 -0.155 9
-0.043 0.288 -0.042 8
-0.047 0.294 0.14 8
-0.054 0.278 0.293 9
-0.04 0.255 0.393 8
-0.03 0.232 0.41 7
-0.042 0.211 0.344 10
-0.038 0.19 0.309 8
-0.052 0.172 0.163 9
-0.056 0.157 -0.005 8
-0.044 0.139 -0.149 8
0.033 0.119 -0.25 9
0.15 0.106 -0.287 8
0.238 0.1 -0.22 9
0.214 0.09 -0.198 8
0.257 0.086 0.007 8
0.263 0.076 0.337 9
0.224 0.066 0.685 7
0.134 0.053 0.962 10
0.012 0.029 1.171 8
-0.104 -0.015 1.302 8
-0.093 -0.013 1.172 9
-0.171 -0.101 1.221 8
-0.187 -0.224 1.176 9
-0.137 -0.368 1.06 8
-0.019 -0.523 0.87 8
0.131 -0.633 0.612 9
0.251 -0.698 0.312 8
0.226 -0.628 0.281 9
0.27 -0.653 0.039 6
0.238 -0.612 -0.126 10
0.188 -0.546 -0.314 9
0.168 -0.494 -0.46 8
0.162 -0.438 -0.51 9
0.168 -0.377 -0.474 8
0.151 -0.339 -0.427 8
0.222 -0.303 -0.277 9
0.371 -0.295 -0.096 8
0.523 -0.301 0.024 8
0.58 -0.276 0.074 9
0.535 -0.232 0.07 8
0.482 -0.209 0.063 7
0.374 -0.169 0.003 10
0.189 -0.134 -0.11 8
-0.03 -0.09 -0.216 9
-0.203 -0.061 -0.247 8
-0.283 -0.06 -0.179 9
-0.247 -0.084 -0.144 8
-0.152 -0.131 -0.176 8
-0.137 -0.118 -0.158 9
-0.06 -0.18 -0.139 8
-0.02 -0.216 -0.132 9
0.004 -0.212 -0.255 8
0.042 -0.215 -0.482 7
0.06 -0.234 -0.662 10
0.054 -0.242 -0.716 8
0.049 -0.218 -0.645 9
0.004 -0.191 -0.619 8
-0.002 -0.154 -0.536 8
0.016 -0.137 -0.422 9
0.029 -0.094 -0.334 8
-0.003 -0.01 -0.302 8
-0.003 -0.009 -0.272 9
-0.077 0.078 -0.279 8
-0.15 0.134 -0.307 9
-0.176 0.157 -0.326 6
-0.148 0.166 -0.32 10
-0.091 0.166 -0.264 9
-0.01 0.157 -0.134 8
-0.009 0.141 -0.121 9
0.102 0.13 0.001 8
0.207 0.122 0.022 8
0.247 0.124 -0.071 9
0.19 0.164 -0.17 8
0.067 0.245 -0.201 9
-0.051 0.344 -0.204 8
-0.046 0.31 -0.183 8
-0.12 0.407 -0.176 7
-0.149 0.489 -0.072 10
-0.164 0.563 0.189 9
-0.165 0.618 0.522 8
-0.15 0.64 0.818 8
-0.132 0.627 1.033 9
-0.119 0.565 0.93 8
-0.086 0.548 1.05 9
-0.047 0.524 1.029 8
-0.014 0.49 0.862 8
0.003 0.462 0.626 9
-0.011 0.449 0.4 8
-0.01 0.404 0.36 7
-0.033 0.38 0.098 10
-0.037 0.345 -0.241 8
-0.048 0.306 -0.515 9
-0.089 0.251 -0.617 8
-0.16 0.194 -0.507 8
-0.245 0.147 -0.158 9
-0.3 0.09 0.319 8
-0.27 0.081 0.287 9
-0.272 -0.003 0.743 8
-0.217 -0.111 1.034 8
-0.093 -0.231 1.114 9
0.07 -0.38 1.064 7
0.223 -0.528 0.974 10
0.3 -0.616 0.876 8
0.27 -0.555 0.788 8
0.232 -0.578 0.686 9
0.11 -0.564 0.518 8
-0.066 -0.533 0.225 9
-0.224 -0.51 -0.117 8
-0.315 -0.507 -0.466 8
-0.382 -0.505 -0.802 9
-0.343 -0.455 -0.721 8
-0.435 -0.431 -0.937 9
-0.524 -0.373 -0.982 6
-0.531 -0.311 -0.924 10
-0.419 -0.261 -0.828 9
-0.251 -0.223 -0.671 8
-0.098 -0.201 -0.423 8
-0.088 -0.181 -0.38 9
0.038 -0.167 -0.078 8
0.115 -0.144 0.176 9
0.148 -0.117 0.349 8
0.175 -0.1 0.462 8
0.178 -0.079 0.517 9
0.16 -0.071 0.462 8
0.12 -0.064 0.416 7
0.066 -0.034 0.255 10
0.003 -0.029 0.018 8
-0.105 -0.021 -0.225 9
-0.235 -0.017 -0.396 8
-0.277 -0.026 -0.544 9
-0.25 -0.023 -0.489 8
-0.174 -0.049 -0.634 8
-0.068 -0.082 -0.701 9
0.007 -0.086 -0.662 8
0.061 -0.07 -0.556 8
0.126 -0.068 -0.43 9
0.113 -0.062 -0.387 7
0.177 -0.068 -0.304 10
0.198 -0.052 -0.288 8
0.169 -0.018 -0.319 8
0.102 0.015 -0.35 9
0.019 0.056 -0.363 8
-0.057 0.11 -0.364 9
-0.096 0.165 -0.323 8
-0.086 0.148 -0.29 8
-0.108 0.186 -0.212 9
-0.135 0.248 -0.142 8
-0.143 0.336 -0.09 9
-0.114 0.414 -0.006 6
-0.076 0.49 0.148 10
-0.034 0.566 0.4 9
-0.03 0.509 0.36 8
0.021 0.567 0.626 9
0.087 0.58 0.837 8
0.16 0.562 1.002 8
0.188 0.541 1.09 9
0.146 0.509 1.129 8
0.065 0.467 1.133 9
0.059 0.421 1.02 8
-0.018 0.381 0.937 8
-0.07 0.329 0.669 7
-0.063 0.281 0.24 10
-0.004 0.238 -0.312 9
0.089 0.199 -0.814 8
0.185 0.167 -1.099 8
0.166 0.15 -0.989 9
0.217 0.134 -1.051 8
0.229 0.129 -0.907 8
0.247 0.1 -0.592 9
0.309 0.034 -0.134 8
0.387 -0.051 0.335 9
0.43 -0.143 0.753 8
0.387 -0.129 0.678 7
0.397 -0.253 0.957 10
0.362 -0.409 1.048 8
0.288 -0.519 1.016 9
0.196 -0.551 0.87 8
0.11 -0.548 0.599 8
0.041 -0.528 0.268 9
0.037 -0.475 0.242 8
-0.007 -0.449 -0.057 9
-0.028 -0.427 -0.291 8
-0.026 -0.401 -0.383 8
-0.017 -0.368 -0.332 9
-0.015 -0.331 -0.299 6
0.042 -0.308 -0.147 11
0.038 -0.278 -0.132 8
0.097 -0.254 -0.089 8
0.131 -0.23 -0.062 9
0.121 -0.21 -0.044 8
0.049 -0.176 -0.033 8
-0.059 -0.133 -0.02 9
-0.053 -0.108 0.002 8
-0.156 -0.097 0.002 9
-0.218 -0.092 0.012 8
-0.22 -0.089 -0.002 8
-0.181 -0.103 -0.033 7
-0.132 -0.145 -0.121 10
-0.087 -0.2 -0.299 9
-0.078 -0.18 -0.269 8
-0.031 -0.237 -0.485 8
0.02 -0.312 -0.682 9
0.061 -0.381 -0.806 8
0.069 -0.377 -0.816 9
0.06 -0.324 -0.73 8
0.062 -0.298 -0.594 8
0.055 -0.268 -0.535 9
0.051 -0.22 -0.42 8
0.031 -0.115 -0.327 7
0.018 -0.022 -0.255 10
0.012 0.049 -0.226 8
0.004 0.113 -0.239 9
0.006 0.15 -0.222 8
0.005 0.135 -0.2 8
0.017 0.151 -0.107 9
0.042 0.152 0.003 8
0.078 0.148 0.042 9
0.11 0.151 -0.006 8
0.116 0.154 -0.099 8
0.081 0.18 -0.2 9
0.073 0.162 -0.18 7
0.003 0.252 -0.211 10
-0.049 0.342 -0.21 8
-0.039 0.374 -0.254 8
0.006 0.371 -0.293 9
0.046 0.37 -0.301 8
0.073 0.368 -0.287 9
0.066 0.331 -0.258 8
0.074 0.34 -0.235 8
0.071 0.363 -0.209 9
0.06 0.398 -0.119 8
0.032 0.451 0.111 9
-0.006 0.493 0.435 6
-0.035 0.497 0.703 10
-0.032 0.448 0.632 9
-0.053 0.436 0.801 8
-0.051 0.414 0.86 9
-0.003 0.385 0.785 8
0.075 0.356 0.645 8
0.139 0.322 0.476 9
0.13 0.293 0.293 8
0.117 0.264 0.264 8
0.007 0.25 0.153 9
-0.179 0.239 0.084 8
-0.371 0.22 -0.013 7
-0.533 0.194 -0.113 10
-0.651 0.168 -0.16 8
-0.586 0.152 -0.109 9
-0.646 0.136 -0.098 8
-0.626 0.099 0.083 9
-0.535 0.042 0.429 8
-0.414 -0.079 0.862 8
-0.299 -0.272 1.33 9
-0.186 -0.48 1.708 8
-0.167 -0.432 1.537 9
-0.029 -0.59 1.601 8
0.147 -0.685 1.213 7
0.32 -0.75 0.474 10
0.415 -0.752 -0.384 8
0.39 -0.658 -1.025 9
0.274 -0.52 -1.292 8
0.246 -0.468 -1.163 8
0.078 -0.353 -1.2 9
-0.077 -0.279 -1.053 8
-0.166 -0.234 -0.774 9
-0.165 -0.206 -0.446 8
-0.132 -0.183 -0.124 8
-0.141 -0.156 0.259 9
-0.127 -0.141 0.233 6
-0.155 -0.087 0.649 10
-0.145 -0.011 0.894 9
-0.055 0.043 0.95 8
0.065 0.061 0.919 9
0.135 0.057 0.855 8
0.178 0.032 0.732 8
0.16 0.029 0.659 9
0.207 -0.027 0.393 8
0.237 -0.099 0.001 9
0.238 -0.162 -0.463 8
0.211 -0.232 -0.909 8
0.164 -0.282 -1.164 7
0.097 -0.277 -1.219 10
0.087 -0.25 -1.097 9
0.019 -0.227 -1.057 8
-0.015 -0.2 -0.95 8
-0.006 -0.164 -0.744 9
0.035 -0.129 -0.483 8
0.084 -0.125 -0.262 9
0.115 -0.13 -0.111 8
0.103 -0.117 -0.1 8
0.118 -0.104 0.005 9
0.105 -0.097 0.071 8
0.063 -0.094 0.06 7
0.009 -0.08 -0.017 10
-0.043 -0.06 -0.122 8
-0.079 -0.021 -0.25 9
-0.071 -0.019 -0.225 8
-0.099 0.029 -0.331 8
-0.143 0.076 -0.33 9
-0.17 0.123 -0.265 8
-0.159 0.17 -0.17 9
-0.147 0.247 -0.046 8
-0.132 0.362 0.132 8
-0.119 0.325 0.118 9
-0.068 0.45 0.286 7
0.008 0.558 0.39 10
0.078 0.618 0.464 8
0.117 0.637 0.563 8
0.117 0.643 0.633 9
0.105 0.578 0.57 8
0.045 0.574 0.561 9
-0.081 0.544 0.592 8
-0.228 0.503 0.645 8
-0.321 0.459 0.551 9
-0.349 0.41 0.333 8
-0.343 0.368 0.114 9
-0.309 0.331 0.102 6
-0.249 0.299 -0.114 10
-0.138 0.27 -0.323 9
-0.007 0.247 -0.468 8
0.097 0.23 -0.541 9
0.171 0.213 -0.627 8
0.243 0.192 -0.739 8
0.219 0.173 -0.665 9
0.291 0.152 -0.722 8
0.346 0.132 -0.681 8
0.359 0.106 -0.428 9
0.305 0.058 0.096 8
0.184 0.0 0.703 7
0.071 -0.088 1.233 10
0.064 -0.079 1.11 8
0.046 -0.279 1.519 9
0.102 -0.539 1.639 8
0.192 -0.752 1.368 9
0.251 -0.921 0.881 8
0.218 -0.996 0.374 8
0.1 -0.958 -0.046 9
0.09 -0.862 -0.042 8
-0.045 -0.828 -0.338 9
-0.157 -0.839 -0.39 8
-0.177 -0.803 -0.287 7
-0.139 -0.736 -0.283 10
-0.118 -0.606 -0.395 8
-0.06 -0.391 -0.595 9
-0.054 -0.352 -0.536 8
0.063 -0.183 -0.776 8
0.235 -0.089 -0.866 9
0.443 -0.055 -0.688 8
0.647 -0.081 -0.339 8
0.766 -0.128 0.016 9
0.69 -0.123 0.27 8
0.621 -0.11 0.243 9
0.572 -0.01 0.352 6
0.344 0.131 0.351 10
0.128 0.254 0.352 9
-0.026 0.324 0.393 8
-0.113 0.321 0.476 9
-0.101 0.289 0.429 8
-0.157 0.253 0.499 8
-0.196 0.203 0.479 9
-0.183 0.116 0.341 8
-0.118 0.069 0.077 9
-0.09 0.088 -0.314 8
-0.077 0.04 -0.621 8
-0.069 0.036 -0.559 7
-0.031 -0.086 -0.629 10
-0.045 -0.118 -0.541 9
-0.118 -0.052 -0.351 8
-0.192 0.0 -0.172 8
-0.223 0.022 -0.114 9
-0.198 0.046 -0.197 8
-0.178 0.042 -0.177 9
-0.127 0.079 -0.299 8
-0.08 0.103 -0.25 8
-0.052 0.128 -0.059 9
-0.027 0.149 0.145 8
0.019 0.107 0.371 7
0.094 0.036 0.574 10
0.084 0.032 0.516 8
0.155 -0.008 0.677 9
0.196 -0.035 0.776 8
0.244 -0.06 0.801 8
0.289 -0.079 0.778 9
0.306 -0.092 0.738 8
0.294 -0.097 0.675 9
0.264 -0.087 0.607 8
0.262 -0.072 0.517 8
0.227 -0.026 0.422 9
0.165 0.014 0.257 7
0.107 0.057 -0.029 10
-0.002 0.162 -0.356 8
-0.124 0.297 -0.69 8
-0.111 0.267 -0.621 9
-0.195 0.38 -0.951 8
-0.27 0.474 -1.153 9
-0.366 0.538 -1.114 8
-0.462 0.543 -0.87 8
-0.499 0.47 -0.514 9
-0.429 0.353 -0.171 8
-0.386 0.318 -0.154 8
-0.27 0.157 0.097 7
-0.118 -0.06 0.203 10
0.033 -0.215 0.181 9
0.125 -0.256 0.116 8
0.153 -0.214 0.022 8
0.12 -0.115 -0.053 9
0.108 -0.103 -0.048 8
0.072 0.01 -0.079 9
0.055 0.054 -0.042 8
0.041 -0.024 0.014 8
0.021 -0.128 0.062 9
-0.006 -0.175 0.079 8
-0.005 -0.157 0.071 7
-0.036 -0.173 0.003 10
-0.062 -0.174 -0.15 8
-0.077 -0.164 -0.29 9
-0.103 -0.143 -0.373 8
-0.151 -0.103 -0.41 9
-0.21 -0.061 -0.36 8
-0.189 -0.055 -0.324 8
-0.221 -0.025 -0.221 9
-0.192 -0.016 -0.13 8
-0.108 -0.051 -0.065 8
-0.011 -0.105 -0.008 9
0.046 -0.145 -0.002 7
0.055 -0.144 -0.098 10
0.049 -0.13 -0.088 8
0.021 -0.104 -0.211 8
-0.022 -0.082 -0.295 9
-0.056 -0.064 -0.342 8
-0.091 -0.029 -0.352 9
-0.156 0.029 -0.306 8
-0.228 0.093 -0.214 8
-0.205 0.083 -0.193 9
-0.221 0.12 -0.105 8
-0.155 0.116 -0.044 9
-0.066 0.107 0.008 6
-0.015 0.123 0.075 10
0.0 0.154 0.134 9
0.02 0.173 0.188 8
0.018 0.156 0.17 9
0.055 0.137 0.202 8
0.093 0.082 0.221 8
0.12 0.015 0.26 9
0.126 -0.041 0.297 8
0.115 -0.063 0.302 9
0.096 -0.054 0.244 8
0.087 -0.049 0.219 8
0.055 -0.018 0.102 7
-0.001 0.029 0.0 10
-0.068 0.067 -0.027 9
-0.114 0.093 -0.034 8
-0.122 0.098 -0.068 8
-0.102 0.066 -0.082 9
-0.092 0.059 -0.074 8
-0.048 -0.006 -0.043 8
0.005 -0.077 0.034 9
0.036 -0.115 0.126 8
0.044 -0.122 0.188 9
0.061 -0.126 0.104 8
0.055 -0.113 0.093 7
0.089 -0.126 0.013 10
0.093 -0.128 0.045 8
0.009 -0.066 0.025 9
-0.12 0.101 -0.066 8
-0.224 0.257 -0.134 8
-0.254 0.288 -0.063 9
-0.187 0.243 0.068 8
-0.168 0.219 0.061 9
-0.062 0.15 0.182 8
0.028 0.094 0.269 8
0.074 0.09 0.278 9
0.111 0.067 0.182 6
0.222 -0.044 -0.03 11
0.199 -0.04 -0.027 8
0.308 -0.151 -0.17 8
0.275 -0.179 -0.17 9
0.15 -0.095 -0.136 8
-0.005 0.049 -0.109 8
-0.151 0.173 -0.112 9
-0.21 0.23 -0.138 8
-0.189 0.207 -0.124 9
-0.157 0.165 -0.131 8
-0.088 0.05 -0.059 8
-0.022 -0.051 0.048 7
0.009 -0.091 0.123 10
0.001 -0.085 0.17 9
-0.019 -0.07 0.189 8
-0.017 -0.063 0.17 8
-0.044 -0.03 0.167 9
-0.078 0.054 0.146 8
-0.108 0.15 0.103 9
-0.097 0.187 0.044 8
-0.046 0.164 -0.029 8
-0.013 0.145 -0.106 9
-0.011 0.131 -0.095 8
-0.018 0.135 -0.149 7
-0.033 0.113 -0.172 10
-0.033 0.06 -0.183 8
-0.035 0.019 -0.216 9
-0.039 -0.006 -0.262 8
-0.018 -0.066 -0.281 8
-0.016 -0.059 -0.253 9
0.018 -0.111 -0.262 8
0.042 -0.122 -0.265 9
0.056 -0.129 -0.207 8
0.071 -0.154 -0.058 8
0.093 -0.192 0.098 9
0.084 -0.173 0.089 7
0.11 -0.203 0.16 10
0.137 -0.216 0.134 8
0.139 -0.207 0.023 8
0.096 -0.156 -0.093 9
0.035 -0.087 -0.14 8
0.003 -0.048 -0.158 9
-0.005 -0.025 -0.206 8
-0.005 -0.022 -0.185 8
-0.019 0.019 -0.215 9
-0.036 0.046 -0.152 8
-0.045 0.055 -0.028 9
-0.038 0.053 0.052 6
-0.035 0.054 0.066 10
-0.046 0.09 0.043 9
-0.041 0.081 0.039 8
-0.027 0.092 -0.03 9
0.012 0.051 -0.127 8
0.053 0.0 -0.205 8
0.067 -0.018 -0.211 9
0.034 0.017 -0.117 8
0.031 0.07 0.019 8
0.028 0.063 0.017 9
-0.053 0.06 0.097 8
-0.071 0.035 0.091 7
-0.094 0.033 0.034 10
-0.093 0.029 -0.049 8
-0.062 0.009 -0.131 9
-0.056 0.008 -0.118 8
-0.003 -0.033 -0.148 9
0.061 -0.087 -0.17 8
0.118 -0.132 -0.233 8
0.147 -0.144 -0.263 9
0.135 -0.085 -0.198 8
0.063 0.001 -0.029 9
0.057 0.001 -0.026 8
-0.069 0.08 0.175 7
-0.19 0.159 0.249 10
-0.243 0.205 0.201 8
-0.233 0.206 0.157 9
-0.17 0.141 0.148 8
-0.056 0.004 0.125 8
-0.05 0.004 0.113 9
0.059 -0.139 0.059 8
0.128 -0.212 -0.003 9
0.156 -0.199 -0.07 8
0.159 -0.15 -0.205 8
0.067 -0.084 -0.46 9
0.061 -0.075 -0.414 6
-0.095 -0.037 -0.504 10
-0.331 0.035 -0.243 9
-0.526 0.228 0.058 8
-0.462 0.367 0.192 9
-0.226 0.364 0.314 8
0.017 0.34 0.546 8
0.193 0.368 0.761 9
0.174 0.331 0.685 8
0.368 0.373 0.734 9
0.617 0.354 0.608 8
0.735 0.235 0.457 8
0.65 0.095 0.356 7
0.461 -0.021 0.239 10
0.255 -0.114 0.006 9
# end
#Thu Feb 26 20:18:02 GMT+08:00 2015 
