# Supplementary material for: Abnormal Gait Behavior Detection for Elderly Based on Enhanced Wigner-Ville Analysis and Cloud Incremental SVM Learning
Source: Hindawi journal article supplement (doi:10.1155/2016/5869238), 2016-01-01
Supplement: f1 [file 5869238.f1.zip › Supplementary Materials/Original Data/Normal walking/original__9.txt]

# Accelerometer Values
# filename:  original__9.txt
# Saving start time: Thu Feb 26 20:18:06 GMT+08:00 2015

# sensor resolution: 0.0095825195m/s^2
#Sensorvendor: KIONIX, name: KX023 Accelerometer, type: 1,version : 1, range 39.240005

# X value, Y value, Z value, time diff in ms
-0.024 -0.052 -0.461 6
-0.017 -0.012 -0.343 11
0.016 -0.02 -0.128 8
0.051 -0.061 0.093 8
0.083 -0.1 0.242 9
0.075 -0.09 0.218 8
0.104 -0.124 0.266 8
0.113 -0.131 0.198 9
0.09 -0.101 0.08 8
0.043 -0.06 -0.01 9
-0.008 -0.022 -0.09 8
-0.048 0.011 -0.171 8
-0.043 0.01 -0.154 7
-0.063 0.03 -0.199 10
-0.082 0.057 -0.174 9
-0.092 0.079 -0.112 8
-0.071 0.066 -0.096 8
-0.028 0.045 -0.111 9
0.008 0.042 -0.085 8
0.007 0.038 -0.076 9
0.018 0.039 0.059 8
0.004 0.046 0.233 8
-0.03 0.067 0.324 9
-0.066 0.077 0.283 8
-0.059 0.069 0.254 7
-0.057 0.134 -0.155 10
-0.051 0.121 -0.139 8
-0.021 0.112 -0.25 9
0.007 0.066 -0.248 8
0.028 0.035 -0.136 9
0.047 0.009 0.05 8
0.077 -0.048 0.168 8
0.07 -0.044 0.151 9
0.129 -0.101 0.092 8
0.181 -0.14 -0.041 8
0.17 -0.157 -0.137 9
0.097 -0.124 -0.224 7
0.008 -0.023 -0.31 10
-0.068 0.088 -0.408 8
-0.062 0.079 -0.367 8
-0.103 0.129 -0.462 9
-0.091 0.117 -0.504 8
-0.058 0.074 -0.449 9
-0.029 0.0 -0.247 8
-0.004 -0.073 0.032 8
0.017 -0.121 0.285 9
0.015 -0.109 0.257 8
0.032 -0.133 0.414 9
0.026 -0.121 0.454 6
0.002 -0.051 0.395 10
-0.019 0.03 0.261 9
-0.025 0.082 0.132 8
-0.019 0.083 0.076 9
-0.017 0.075 0.068 8
0.008 0.002 0.03 8
0.043 -0.063 -0.032 9
0.064 -0.088 -0.069 8
0.064 -0.103 -0.079 8
0.05 -0.121 -0.107 9
0.034 -0.135 -0.127 8
0.031 -0.122 -0.115 7
0.004 -0.1 -0.152 10
-0.036 -0.008 -0.175 8
-0.095 0.104 -0.1 9
-0.146 0.16 0.008 8
-0.143 0.131 0.033 9
-0.102 0.062 -0.005 8
-0.092 0.056 -0.005 8
-0.07 0.036 0.042 9
-0.083 0.078 0.182 8
-0.092 0.14 0.258 9
-0.084 0.201 0.204 8
-0.055 0.227 0.095 7
-0.063 0.241 0.024 10
-0.057 0.217 0.022 8
-0.136 0.234 -0.056 9
-0.223 0.228 -0.185 8
-0.292 0.215 -0.305 8
-0.361 0.194 -0.306 9
-0.434 0.136 -0.22 8
-0.473 0.077 -0.238 9
-0.426 0.069 -0.214 8
-0.39 0.024 -0.295 8
-0.314 -0.036 -0.314 9
-0.236 -0.115 -0.325 6
-0.17 -0.183 -0.362 10
-0.121 -0.211 -0.373 9
-0.109 -0.19 -0.355 8
-0.073 -0.171 -0.32 9
-0.032 -0.156 -0.3 8
0.054 -0.173 -0.283 8
0.148 -0.195 -0.262 9
0.2 -0.236 -0.237 8
0.228 -0.27 -0.203 9
0.205 -0.243 -0.183 8
0.211 -0.291 -0.144 8
0.188 -0.342 -0.13 7
0.125 -0.32 -0.147 10
0.056 -0.257 -0.18 9
0.003 -0.204 -0.225 8
-0.068 -0.145 -0.28 8
-0.061 -0.131 -0.252 9
-0.115 -0.068 -0.289 8
-0.123 -0.006 -0.205 9
-0.089 0.018 0.024 8
-0.028 0.015 0.328 8
0.022 0.014 0.567 9
0.038 0.027 0.58 8
0.034 0.024 0.522 7
0.019 0.075 0.336 10
0.01 0.153 0.091 8
0.036 0.235 -0.084 9
0.043 0.321 -0.156 8
0.012 0.418 -0.178 8
-0.017 0.511 -0.142 9
-0.016 0.46 -0.128 8
-0.012 0.511 0.043 9
0.046 0.513 0.34 8
0.11 0.494 0.616 8
0.127 0.469 0.851 9
0.099 0.445 1.077 7
0.057 0.428 1.23 10
0.051 0.385 1.107 8
0.01 0.393 1.148 8
-0.015 0.41 1.072 9
-0.047 0.43 0.942 8
-0.072 0.444 0.779 9
-0.005 0.403 0.599 8
0.09 0.319 0.499 8
0.081 0.287 0.449 9
0.13 0.204 0.425 8
0.164 0.119 0.388 9
0.194 0.054 0.331 6
0.195 0.016 0.246 10
0.153 -0.001 0.141 9
0.043 0.002 0.063 8
0.039 0.001 0.057 8
-0.121 0.013 0.044 9
-0.266 0.017 0.176 8
-0.32 -0.003 0.396 9
-0.237 -0.125 0.546 8
-0.046 -0.405 0.615 8
0.177 -0.766 0.617 9
0.159 -0.69 0.556 8
0.319 -0.981 0.476 7
0.333 -1.068 0.231 10
0.244 -0.939 -0.207 8
0.16 -0.706 -0.724 9
0.069 -0.492 -1.124 8
0.062 -0.443 -1.012 9
-0.018 -0.275 -1.214 8
-0.003 -0.137 -1.245 8
0.098 -0.078 -0.98 9
0.25 -0.074 -0.458 8
0.391 -0.081 0.11 9
0.493 -0.118 0.557 8
0.444 -0.106 0.501 7
0.517 -0.151 0.734 10
0.504 -0.181 0.773 8
0.391 -0.186 0.632 9
0.216 -0.17 0.32 8
0.052 -0.157 -0.095 8
-0.044 -0.165 -0.516 9
-0.039 -0.149 -0.465 8
-0.087 -0.185 -0.797 9
-0.115 -0.248 -0.971 8
-0.112 -0.357 -1.005 8
-0.049 -0.468 -0.949 9
0.031 -0.538 -0.763 6
0.067 -0.581 -0.484 10
0.06 -0.523 -0.436 9
0.057 -0.53 -0.261 8
0.039 -0.476 -0.236 9
0.009 -0.358 -0.296 8
-0.033 -0.191 -0.363 8
-0.076 -0.006 -0.302 9
-0.113 0.135 -0.106 8
-0.101 0.122 -0.095 9
-0.126 0.193 0.117 8
-0.116 0.187 0.212 8
-0.081 0.141 0.101 7
-0.048 0.107 -0.113 10
-0.034 0.087 -0.315 9
-0.032 0.101 -0.446 8
-0.029 0.091 -0.401 8
-0.025 0.127 -0.453 9
-0.02 0.158 -0.454 8
-0.007 0.182 -0.434 9
0.013 0.214 -0.406 8
0.039 0.259 -0.364 8
0.071 0.343 -0.294 9
0.064 0.309 -0.265 8
0.081 0.431 -0.087 7
0.051 0.546 0.264 10
-0.022 0.633 0.685 8
-0.102 0.682 1.067 9
-0.172 0.7 1.331 8
-0.236 0.683 1.413 8
-0.213 0.615 1.272 9
-0.227 0.582 1.218 8
-0.162 0.553 1.032 9
-0.077 0.546 0.735 8
-0.024 0.585 0.463 8
-0.007 0.586 0.304 9
-0.007 0.527 0.273 6
-0.026 0.478 0.146 11
-0.081 0.43 0.038 8
-0.16 0.345 -0.022 8
-0.283 0.263 -0.051 9
-0.453 0.197 -0.047 8
-0.611 0.137 0.026 9
-0.7 0.088 0.234 8
-0.63 0.079 0.21 8
-0.631 0.006 0.476 9
-0.531 -0.102 0.666 8
-0.349 -0.244 0.809 8
-0.127 -0.42 0.841 7
0.088 -0.585 0.738 10
0.079 -0.526 0.664 9
0.235 -0.675 0.553 8
0.276 -0.765 0.453 8
0.168 -0.738 0.324 9
0.007 -0.687 0.045 8
-0.124 -0.651 -0.376 9
-0.251 -0.558 -0.869 8
-0.225 -0.502 -0.782 8
-0.326 -0.37 -1.181 9
-0.318 -0.266 -1.306 8
-0.216 -0.209 -1.08 7
-0.136 -0.174 -0.55 10
-0.097 -0.165 0.026 8
-0.006 -0.196 0.439 9
-0.005 -0.177 0.395 8
0.16 -0.314 0.564 9
0.347 -0.549 0.435 8
0.5 -0.728 0.076 8
0.549 -0.746 -0.304 9
0.463 -0.63 -0.575 8
0.294 -0.48 -0.736 8
0.265 -0.432 -0.663 9
0.052 -0.261 -0.721 7
-0.145 -0.074 -0.658 10
-0.268 0.039 -0.581 8
-0.286 0.075 -0.532 8
-0.214 0.048 -0.46 9
-0.095 -0.032 -0.399 8
-0.085 -0.029 -0.359 9
0.033 -0.084 -0.362 8
0.112 -0.067 -0.33 8
0.116 -0.055 -0.212 9
0.054 -0.04 -0.109 8
-0.031 0.034 -0.077 9
-0.028 0.031 -0.069 6
-0.119 0.133 -0.071 10
-0.199 0.215 -0.057 9
-0.224 0.247 -0.016 8
-0.166 0.248 0.037 9
-0.067 0.235 0.001 8
0.039 0.22 -0.143 8
0.127 0.212 -0.307 9
0.114 0.191 -0.276 8
0.147 0.201 -0.415 9
0.108 0.249 -0.49 8
0.027 0.342 -0.427 8
-0.045 0.421 -0.141 7
-0.085 0.453 0.225 10
-0.085 0.492 0.447 8
-0.077 0.443 0.402 9
-0.012 0.496 0.492 8
0.101 0.504 0.52 9
0.183 0.448 0.542 8
0.215 0.35 0.54 8
0.188 0.267 0.532 9
0.06 0.255 0.508 8
0.054 0.23 0.457 9
-0.088 0.236 0.367 8
-0.158 0.239 0.175 7
-0.156 0.269 -0.109 10
-0.103 0.302 -0.38 8
-0.012 0.326 -0.584 9
0.099 0.344 -0.682 8
0.089 0.309 -0.614 8
0.2 0.323 -0.522 9
0.274 0.325 -0.298 8
0.308 0.32 -0.096 9
0.342 0.303 0.046 8
0.388 0.278 0.193 8
0.414 0.246 0.372 9
0.373 0.221 0.335 6
0.357 0.167 0.569 11
0.305 0.051 0.835 8
0.24 -0.172 1.022 8
0.174 -0.434 1.097 9
0.108 -0.616 1.045 8
0.043 -0.725 0.83 8
0.039 -0.652 0.747 9
-0.027 -0.722 0.434 8
-0.097 -0.761 0.12 9
-0.167 -0.767 -0.108 8
-0.224 -0.743 -0.258 8
-0.201 -0.669 -0.232 7
-0.288 -0.611 -0.642 10
-0.259 -0.55 -0.578 9
-0.242 -0.489 -0.826 8
-0.215 -0.367 -0.986 8
-0.191 -0.238 -1.001 9
-0.111 -0.175 -0.884 8
0.018 -0.161 -0.6 9
0.154 -0.168 -0.211 8
0.138 -0.151 -0.19 8
0.267 -0.152 0.164 9
0.37 -0.11 0.446 8
0.393 -0.028 0.654 7
0.317 0.064 0.745 10
0.192 0.169 0.757 8
0.173 0.284 0.738 9
0.156 0.256 0.664 8
-0.02 0.329 0.614 8
-0.047 0.301 0.537 9
-0.042 0.195 0.44 8
-0.04 0.088 0.28 9
-0.066 0.009 0.073 8
-0.059 0.008 0.066 8
-0.123 -0.051 -0.145 9
-0.229 -0.084 -0.375 7
-0.336 -0.081 -0.577 10
-0.408 -0.052 -0.703 8
-0.442 -0.01 -0.781 8
-0.402 0.041 -0.813 9
-0.362 0.037 -0.732 8
-0.225 0.054 -0.639 9
-0.033 0.037 -0.391 8
0.114 0.026 -0.094 8
0.181 0.015 0.133 9
0.198 0.0 0.229 8
0.204 -0.01 0.229 9
0.184 -0.009 0.206 6
0.178 -0.011 0.131 10
0.133 0.013 -0.028 9
0.073 0.062 -0.24 8
0.034 0.108 -0.444 9
0.039 0.121 -0.556 8
0.076 0.102 -0.531 8
0.069 0.092 -0.478 9
0.099 0.085 -0.371 8
0.107 0.099 -0.192 8
0.106 0.093 0.01 9
0.108 0.087 0.083 8
0.085 0.164 0.095 7
0.021 0.283 0.177 10
0.019 0.254 0.159 8
-0.055 0.341 0.259 9
-0.117 0.415 0.328 8
-0.15 0.473 0.407 9
-0.14 0.502 0.54 8
-0.066 0.487 0.714 8
0.061 0.429 0.859 9
0.055 0.386 0.773 8
0.207 0.34 0.844 9
0.336 0.33 0.829 8
0.396 0.346 0.687 7
0.389 0.36 0.435 10
0.303 0.354 0.168 8
0.164 0.341 -0.047 9
0.148 0.307 -0.042 8
0.02 0.303 -0.244 8
-0.08 0.28 -0.484 9
-0.147 0.234 -0.66 8
-0.198 0.178 -0.666 9
-0.287 0.131 -0.483 8
-0.413 0.094 -0.143 8
-0.372 0.085 -0.128 9
-0.483 0.009 0.321 6
-0.548 -0.143 0.819 10
-0.555 -0.367 1.275 9
-0.475 -0.572 1.54 8
-0.325 -0.731 1.564 9
-0.169 -0.889 1.373 8
-0.152 -0.8 1.236 8
0.0 -0.913 0.83 9
0.144 -0.946 0.278 8
0.245 -0.927 -0.307 9
0.274 -0.852 -0.865 8
0.23 -0.729 -1.285 8
0.207 -0.656 -1.157 7
0.087 -0.545 -1.332 10
-0.106 -0.443 -1.289 9
-0.346 -0.326 -1.135 8
-0.538 -0.198 -0.953 8
-0.613 -0.082 -0.736 9
-0.595 -0.001 -0.473 8
-0.469 0.056 -0.214 9
-0.422 0.051 -0.193 8
-0.213 0.093 -0.001 8
0.016 0.11 0.157 9
0.172 0.118 0.353 8
0.265 0.072 0.43 7
0.348 -0.006 0.394 10
0.351 -0.008 0.45 8
0.316 -0.007 0.405 9
0.257 0.01 0.464 8
0.199 -0.02 0.439 8
0.144 -0.069 0.366 9
0.087 -0.083 0.237 8
0.029 -0.065 0.047 9
0.001 -0.061 -0.176 8
0.001 -0.055 -0.159 8
0.045 -0.114 -0.436 9
0.138 -0.207 -0.67 7
0.164 -0.234 -0.74 10
0.126 -0.216 -0.785 8
0.101 -0.219 -0.787 8
0.091 -0.197 -0.708 9
0.031 -0.195 -0.637 8
-0.038 -0.172 -0.583 9
-0.023 -0.129 -0.503 8
0.028 -0.088 -0.21 8
0.027 0.005 0.145 9
-0.026 0.136 0.519 8
-0.024 0.122 0.467 9
-0.084 0.206 0.801 6
-0.14 0.267 0.965 10
-0.206 0.307 0.997 9
-0.243 0.328 0.945 8
-0.217 0.315 0.802 8
-0.184 0.334 0.538 9
-0.166 0.3 0.484 8
-0.162 0.399 0.182 9
-0.147 0.487 -0.035 8
-0.102 0.531 -0.126 8
-0.036 0.546 -0.126 9
0.034 0.554 -0.092 8
0.03 0.499 -0.083 7
0.08 0.506 -0.044 10
0.084 0.521 0.045 8
0.052 0.515 0.195 9
-0.006 0.447 0.352 8
-0.083 0.37 0.457 9
-0.141 0.33 0.474 8
-0.129 0.306 0.374 8
-0.116 0.275 0.337 9
-0.014 0.202 0.108 8
0.152 0.105 -0.16 9
0.317 0.092 -0.435 8
0.48 0.16 -0.709 7
0.643 0.203 -0.826 10
0.753 0.152 -0.635 8
0.678 0.137 -0.572 8
0.68 0.03 -0.113 9
0.565 -0.108 0.45 8
0.381 -0.284 1.021 9
0.184 -0.437 1.52 8
0.041 -0.558 1.697 8
-0.027 -0.695 1.463 9
-0.024 -0.625 1.316 8
-0.042 -0.752 0.803 9
-0.048 -0.833 0.196 6
-0.07 -0.879 -0.314 10
-0.112 -0.843 -0.685 9
-0.2 -0.725 -0.935 8
-0.316 -0.537 -1.112 9
-0.284 -0.484 -1.0 8
-0.331 -0.321 -1.095 8
-0.26 -0.254 -0.938 9
-0.096 -0.232 -0.593 8
0.079 -0.27 -0.2 9
0.237 -0.319 0.186 8
0.347 -0.318 0.47 8
0.312 -0.286 0.423 7
0.338 -0.245 0.639 10
0.277 -0.107 0.741 9
0.159 0.106 0.732 8
0.004 0.312 0.661 8
-0.145 0.475 0.508 9
-0.265 0.559 0.351 8
-0.239 0.503 0.316 9
-0.319 0.477 0.221 8
-0.335 0.357 0.149 8
-0.288 0.219 0.0 9
-0.198 0.119 -0.261 8
-0.178 0.107 -0.235 7
-0.037 -0.126 -0.597 10
-0.034 -0.113 -0.538 8
0.0 -0.222 -0.563 9
0.016 -0.279 -0.534 8
0.032 -0.278 -0.455 8
0.049 -0.221 -0.354 9
0.074 -0.154 -0.23 8
0.067 -0.138 -0.207 9
0.111 -0.115 -0.187 8
0.153 -0.102 -0.002 8
0.134 -0.021 0.056 9
0.062 0.073 0.039 6
0.041 0.125 -0.037 11
0.059 0.159 0.042 8
0.053 0.143 0.038 8
0.087 0.126 0.247 9
0.166 0.043 0.38 8
0.268 -0.06 0.424 9
0.34 -0.11 0.42 8
0.362 -0.103 0.395 8
0.371 -0.063 0.324 9
0.334 -0.056 0.292 8
0.309 0.037 0.207 8
0.178 0.156 0.183 7
0.0 0.292 0.194 10
-0.163 0.457 0.195 9
-0.278 0.56 0.171 8
-0.276 0.55 0.097 8
-0.248 0.495 0.087 9
-0.16 0.41 0.006 8
-0.048 0.246 -0.059 9
0.03 0.086 -0.195 8
0.113 -0.036 -0.391 8
0.246 -0.172 -0.545 9
0.328 -0.265 -0.631 8
0.295 -0.239 -0.568 7
0.229 -0.214 -0.614 10
0.048 -0.117 -0.606 8
-0.148 -0.024 -0.536 9
-0.296 0.039 -0.421 8
-0.368 0.044 -0.218 9
-0.343 0.002 0.003 8
-0.309 0.002 0.002 8
-0.239 -0.035 0.183 9
-0.193 -0.114 0.36 8
-0.159 -0.257 0.459 8
-0.119 -0.378 0.421 9
-0.066 -0.407 0.26 7
-0.028 -0.322 0.064 10
-0.025 -0.29 0.058 8
-0.015 -0.149 -0.128 8
-0.008 -0.016 -0.274 9
0.007 0.058 -0.338 8
0.016 0.085 -0.315 9
-0.004 0.101 -0.176 8
-0.044 0.092 0.062 8
-0.039 0.083 0.056 9
-0.079 0.026 0.268 8
-0.052 -0.118 0.343 9
0.032 -0.29 0.31 6
0.074 -0.341 0.191 10
0.031 -0.214 0.031 9
-0.069 -0.024 -0.057 8
-0.062 -0.022 -0.051 9
-0.156 0.102 -0.077 8
-0.201 0.161 -0.086 8
-0.202 0.181 -0.051 9
-0.156 0.178 0.02 8
-0.094 0.167 0.08 9
-0.06 0.157 0.099 8
-0.054 0.141 0.089 8
-0.056 0.137 0.092 7
-0.089 0.134 0.087 10
-0.122 0.125 0.049 8
-0.142 0.119 -0.026 9
-0.144 0.127 -0.094 8
-0.104 0.139 -0.129 9
-0.093 0.125 -0.116 8
-0.014 0.123 -0.109 8
0.062 0.111 -0.069 9
0.112 0.098 -0.013 8
0.136 0.085 0.038 9
0.148 0.07 0.043 8
0.133 0.063 0.038 7
0.146 0.042 0.022 10
0.142 0.027 0.034 8
0.134 0.042 -0.046 9
0.15 0.05 -0.203 8
0.19 0.017 -0.301 8
0.202 -0.021 -0.341 9
0.169 -0.028 -0.315 8
0.152 -0.025 -0.284 9
0.086 0.002 -0.196 8
-0.002 0.06 -0.104 8
-0.03 0.098 -0.021 9
0.02 0.067 0.081 6
0.083 0.012 0.155 11
0.11 -0.01 0.171 8
0.099 -0.009 0.154 8
0.089 -0.012 0.126 9
0.067 -0.012 0.026 8
0.059 -0.021 -0.129 8
0.072 -0.045 -0.247 9
0.074 -0.073 -0.303 8
0.041 -0.07 -0.311 9
0.037 -0.063 -0.28 8
-0.032 -0.023 -0.244 8
-0.116 0.021 -0.195 7
-0.161 0.055 -0.162 10
-0.149 0.074 -0.138 9
-0.11 0.077 -0.111 8
-0.099 0.069 -0.066 8
-0.059 0.062 -0.059 9
-0.041 0.069 0.02 8
-0.01 0.042 0.057 9
0.042 0.013 0.06 8
0.056 0.019 0.107 8
0.05 0.01 0.157 9
0.045 0.009 0.141 8
0.049 -0.013 0.162 7
0.047 -0.029 0.136 10
0.025 -0.039 0.069 8
-0.017 -0.044 -0.014 9
-0.072 -0.036 -0.088 8
-0.132 -0.018 -0.126 8
-0.118 -0.017 -0.113 9
-0.159 0.0 -0.121 8
-0.163 0.009 -0.113 9
-0.122 0.02 -0.077 8
-0.054 0.018 -0.017 8
0.015 -0.006 0.019 9
0.013 -0.005 0.017 7
0.067 -0.021 -0.015 10
0.1 -0.023 -0.079 8
0.109 -0.02 -0.122 8
0.082 -0.017 -0.143 9
0.025 -0.012 -0.146 8
-0.046 -0.008 -0.132 9
-0.122 -0.006 -0.103 8
-0.11 -0.005 -0.093 8
-0.177 -0.007 -0.047 9
-0.19 -0.01 -0.016 8
-0.142 -0.017 -0.01 9
-0.075 -0.017 0.011 6
-0.018 -0.015 0.061 10
0.019 -0.019 0.066 9
0.017 -0.017 0.059 8
0.066 -0.017 0.001 9
0.098 0.0 -0.035 8
0.077 0.027 -0.035 8
0.025 0.06 -0.031 9
-0.03 0.091 -0.03 8
-0.071 0.106 -0.023 8
-0.064 0.096 -0.021 9
-0.074 0.081 -0.019 8
-0.038 0.033 -0.025 7
0.03 -0.027 -0.04 10
0.1 -0.081 -0.077 8
0.139 -0.098 -0.097 9
0.137 -0.067 -0.08 8
0.123 -0.061 -0.072 9
0.087 0.006 -0.036 8
0.019 0.089 0.013 8
-0.06 0.174 0.057 9
-0.119 0.231 0.077 8
-0.151 0.222 0.087 9
-0.15 0.151 0.115 8
-0.135 0.136 0.103 7
-0.094 0.04 0.124 10
-0.024 -0.042 0.089 8
0.045 -0.1 0.019 9
0.083 -0.126 -0.043 8
0.068 -0.121 -0.087 8
-0.012 -0.085 -0.094 9
-0.011 -0.077 -0.085 8
-0.174 0.002 -0.053 9
-0.381 0.127 0.006 8
-0.515 0.218 0.084 8
-0.46 0.215 0.122 9
-0.267 0.126 0.116 6
-0.057 0.005 0.142 10
-0.051 0.005 0.128 9
0.118 -0.082 0.145 8
0.228 -0.133 0.108 9
0.273 -0.149 0.073 8
0.243 -0.125 0.097 8
0.16 -0.07 0.149 9
0.091 -0.006 0.12 8
0.082 -0.006 0.108 9
0.049 0.043 0.003 8
0.031 0.072 -0.075 8
0.035 0.067 -0.1 7
0.073 0.035 -0.101 10
0.123 -0.013 -0.078 9
0.158 -0.06 0.002 8
0.143 -0.054 0.002 8
0.152 -0.073 0.11 9
0.131 -0.07 0.186 8
0.092 -0.06 0.223 9
0.054 -0.053 0.196 8
0.034 -0.047 0.134 8
0.031 -0.038 0.085 9
0.028 -0.034 0.077 8
0.051 -0.035 0.012 7
0.066 -0.047 -0.098 10
0.074 -0.056 -0.25 8
0.084 -0.068 -0.311 9
0.073 -0.068 -0.261 8
0.065 -0.061 -0.234 8
0.023 -0.033 -0.179 9
0.001 -0.014 -0.123 8
-0.003 -0.005 -0.044 9
-0.02 0.027 0.087 8
-0.035 0.086 0.25 8
-0.054 0.136 0.389 9
-0.049 0.123 0.35 7
-0.055 0.16 0.378 10
-0.024 0.153 0.23 8
0.006 0.117 0.01 8
-0.039 0.161 -0.138 9
-0.161 0.165 -0.256 8
-0.233 0.056 -0.473 9
-0.21 0.05 -0.426 8
-0.199 -0.025 -0.696 8
# end
#Thu Feb 26 20:18:12 GMT+08:00 2015.
