# Supplementary material for: Abnormal Gait Behavior Detection for Elderly Based on Enhanced Wigner-Ville Analysis and Cloud Incremental SVM Learning
Source: Hindawi journal article supplement (doi:10.1155/2016/5869238), 2016-01-01
Supplement: f1 [file 5869238.f1.zip › Supplementary Materials/Original Data/Normal walking/original__10.txt]

# Accelerometer Values
# filename:  original__10.txt
# Saving start time: Thu Feb 26 20:18:16 GMT+08:00 2015

# sensor resolution: 0.0095825195m/s^2
#Sensorvendor: KIONIX, name: KX023 Accelerometer, type: 1,version : 1, range 39.240005

# X value, Y value, Z value, time diff in ms
0.02 -0.004 0.279 8
0.074 -0.019 0.229 8
0.118 -0.031 0.12 9
0.1 -0.022 0.029 8
0.039 0.003 0.012 9
-0.007 0.019 0.026 8
-0.006 0.017 0.024 8
-0.02 0.016 0.018 9
-0.009 0.009 0.005 8
-0.007 0.011 0.026 7
-0.022 0.02 0.07 10
-0.02 0.018 0.065 8
0.013 0.007 -0.025 9
0.012 0.007 -0.022 8
0.039 0.0 -0.114 9
0.022 0.008 -0.114 8
-0.011 0.019 -0.05 8
-0.004 0.014 -0.015 9
0.031 -0.001 -0.049 8
0.046 -0.011 -0.11 9
0.041 -0.01 -0.099 8
0.018 -0.009 -0.114 7
-0.016 -0.005 -0.08 10
-0.031 -0.005 -0.044 8
-0.023 -0.009 -0.002 9
0.002 -0.017 0.043 8
0.032 -0.025 0.071 8
0.028 -0.022 0.064 9
0.045 -0.02 0.089 8
0.063 -0.01 0.118 8
0.099 -0.002 0.128 9
0.122 0.001 0.101 8
0.106 0.005 0.056 9
0.095 0.004 0.051 6
0.068 0.012 -0.013 10
0.045 0.013 -0.079 9
0.014 0.009 -0.118 8
-0.021 0.003 -0.138 9
-0.041 -0.002 -0.158 8
-0.033 -0.014 -0.194 8
-0.008 -0.022 -0.237 9
-0.007 -0.02 -0.213 8
0.024 -0.017 -0.244 9
0.053 -0.005 -0.25 8
0.089 0.0 -0.228 8
0.139 0.0 -0.177 7
0.165 -0.003 -0.073 10
0.128 -0.007 0.083 9
0.115 -0.006 0.074 8
0.035 -0.005 0.189 8
-0.047 0.0 0.22 9
-0.115 0.007 0.208 8
-0.179 0.026 0.151 9
-0.211 0.041 0.035 8
-0.19 0.039 -0.078 8
-0.171 0.035 -0.07 9
-0.125 0.02 -0.122 8
-0.089 0.008 -0.135 7
-0.066 0.001 -0.144 10
-0.053 -0.004 -0.15 8
-0.047 -0.009 -0.146 9
-0.051 -0.006 -0.113 8
-0.046 -0.005 -0.102 8
-0.058 -0.001 -0.013 9
-0.082 0.005 0.122 8
-0.108 0.011 0.238 9
-0.09 0.007 0.28 8
-0.04 -0.003 0.25 8
-0.001 -0.013 0.16 9
-0.001 -0.012 0.144 7
0.012 -0.013 0.04 10
0.008 -0.007 -0.044 8
-0.006 -0.004 -0.106 8
-0.039 0.003 -0.135 9
-0.077 0.013 -0.109 8
-0.102 0.02 -0.022 9
-0.091 0.018 -0.02 8
-0.093 0.02 0.064 8
-0.064 0.016 0.113 9
-0.02 -0.002 0.134 8
0.028 -0.033 0.089 8
0.082 -0.059 -0.036 7
0.118 -0.066 -0.157 10
0.106 -0.059 -0.141 9
0.106 -0.053 -0.209 8
0.087 -0.046 -0.227 8
0.051 -0.028 -0.203 9
0.019 -0.005 -0.145 8
0.005 0.011 -0.039 9
0.008 0.02 0.093 8
0.007 0.018 0.084 8
0.018 0.02 0.185 9
0.011 0.02 0.253 8
-0.011 0.026 0.289 7
-0.015 0.03 0.28 10
-0.002 0.023 0.221 8
0.02 0.016 0.109 9
0.018 0.015 0.098 8
0.049 0.011 -0.05 9
0.089 0.012 -0.173 8
0.1 0.005 -0.235 8
0.059 -0.001 -0.261 9
-0.007 0.006 -0.257 8
-0.089 0.025 -0.159 8
-0.08 0.022 -0.143 9
-0.16 0.024 0.052 7
-0.205 0.014 0.237 10
-0.207 0.003 0.303 8
-0.181 -0.008 0.2 8
-0.156 -0.011 -0.005 9
-0.162 -0.006 -0.166 8
-0.146 -0.006 -0.149 9
-0.188 -0.001 -0.23 8
-0.237 0.004 -0.266 8
-0.256 0.006 -0.275 9
-0.257 0.005 -0.278 8
-0.267 0.011 -0.299 9
-0.24 0.01 -0.269 6
-0.242 0.016 -0.308 10
-0.228 0.022 -0.29 9
-0.223 0.028 -0.213 8
-0.222 0.037 -0.142 9
-0.218 0.043 -0.087 8
-0.205 0.054 -0.048 8
-0.176 0.085 -0.054 9
-0.158 0.077 -0.048 8
-0.096 0.121 -0.095 9
0.015 0.171 -0.132 8
0.158 0.207 -0.116 8
0.295 0.211 -0.057 7
0.401 0.194 0.028 10
0.361 0.18 0.182 8
0.418 0.162 0.163 9
0.434 0.138 0.306 8
0.399 0.085 0.284 9
0.314 0.024 0.138 8
0.188 -0.013 -0.011 8
0.031 -0.026 -0.171 9
0.028 -0.025 -0.375 8
-0.132 -0.023 -0.338 9
-0.249 -0.012 -0.513 8
-0.276 -0.005 -0.603 7
-0.24 0.001 -0.638 10
-0.176 0.022 -0.61 8
-0.109 0.048 -0.418 9
-0.098 0.043 -0.376 8
-0.071 0.063 -0.054 8
-0.071 0.079 0.252 9
-0.058 0.074 0.49 8
-0.058 0.057 0.583 9
-0.094 0.072 0.48 8
-0.129 0.096 0.283 8
-0.116 0.086 0.255 9
-0.113 0.094 0.071 6
-0.078 0.091 -0.083 11
-0.03 0.085 -0.118 8
0.004 0.115 -0.035 8
0.013 0.169 0.048 9
0.005 0.213 0.106 8
0.005 0.191 0.095 8
-0.017 0.223 0.168 9
-0.058 0.269 0.256 8
-0.089 0.31 0.348 9
-0.099 0.321 0.414 8
-0.097 0.325 0.43 8
-0.088 0.292 0.387 7
-0.059 0.275 0.359 10
0.006 0.247 0.248 9
0.099 0.219 0.064 8
0.189 0.172 -0.158 8
0.235 0.143 -0.364 9
0.212 0.155 -0.409 8
0.158 0.163 -0.285 9
0.142 0.147 -0.256 8
0.093 0.097 -0.08 8
0.054 0.0 0.169 9
0.016 -0.145 0.463 8
-0.007 -0.332 0.669 7
0.0 -0.476 0.782 10
0.01 -0.568 0.821 8
0.009 -0.511 0.739 9
0.001 -0.571 0.667 8
0.004 -0.574 0.496 8
0.047 -0.525 0.243 9
0.093 -0.439 -0.019 8
0.142 -0.36 -0.23 9
0.271 -0.328 -0.354 8
0.244 -0.295 -0.318 8
0.475 -0.345 -0.279 9
0.7 -0.449 -0.108 7
0.83 -0.552 0.055 10
0.858 -0.612 0.144 8
0.792 -0.613 0.167 8
0.629 -0.585 0.171 9
0.566 -0.526 0.154 8
0.337 -0.487 0.159 9
0.106 -0.427 0.117 8
-0.058 -0.37 0.001 8
-0.15 -0.323 -0.163 9
-0.211 -0.24 -0.294 8
-0.289 -0.103 -0.329 9
-0.26 -0.093 -0.296 6
-0.368 0.041 -0.214 10
-0.487 0.145 -0.048 9
-0.582 0.228 0.145 8
-0.614 0.262 0.311 9
-0.555 0.249 0.398 8
-0.389 0.202 0.391 8
-0.35 0.182 0.351 9
-0.136 0.11 0.204 8
0.102 0.047 -0.068 8
0.355 -0.021 -0.314 9
0.535 -0.096 -0.456 8
0.555 -0.108 -0.517 7
0.44 -0.068 -0.495 10
0.396 -0.061 -0.446 8
0.242 -0.021 -0.389 9
0.115 -0.013 -0.339 8
0.041 -0.021 -0.3 9
0.013 -0.029 -0.265 8
0.011 -0.033 -0.222 8
0.02 -0.021 -0.179 9
0.018 -0.019 -0.161 8
0.015 0.002 -0.133 9
-0.018 0.037 -0.125 8
-0.07 0.09 -0.121 7
-0.135 0.149 -0.097 10
-0.181 0.184 -0.066 8
-0.177 0.186 -0.042 9
-0.159 0.168 -0.038 8
-0.121 0.155 -0.026 8
-0.06 0.146 -0.052 9
0.001 0.152 -0.141 8
0.017 0.175 -0.287 9
-0.018 0.26 -0.387 8
-0.065 0.4 -0.326 8
-0.058 0.36 -0.293 9
-0.093 0.488 -0.115 6
-0.117 0.59 0.09 10
-0.13 0.674 0.327 9
-0.132 0.719 0.556 8
-0.122 0.715 0.709 9
-0.098 0.68 0.766 8
-0.088 0.612 0.689 8
-0.058 0.571 0.685 9
-0.039 0.526 0.65 8
-0.026 0.478 0.599 9
-0.012 0.432 0.541 8
0.011 0.385 0.476 8
0.01 0.347 0.428 7
0.038 0.311 0.312 10
0.053 0.28 0.093 9
0.05 0.251 -0.115 8
0.027 0.221 -0.156 8
-0.022 0.196 -0.073 9
-0.075 0.164 0.023 8
-0.067 0.148 0.09 9
-0.099 0.133 0.081 8
-0.116 -0.03 0.084 8
-0.121 -0.155 0.028 9
-0.133 -0.287 -0.015 8
-0.155 -0.441 0.042 7
-0.177 -0.565 0.18 10
-0.159 -0.508 0.388 8
-0.171 -0.457 0.349 9
-0.113 -0.751 0.602 8
0.027 -0.957 0.745 8
0.186 -1.111 0.701 9
0.289 -1.15 0.499 8
0.304 -1.106 0.242 9
0.273 -0.995 0.218 8
0.223 -0.915 0.196 8
0.124 -0.785 -0.402 9
-0.011 -0.631 -0.596 7
-0.162 -0.502 -0.664 10
-0.306 -0.399 -0.645 8
-0.401 -0.302 -0.575 8
-0.361 -0.272 -0.518 9
-0.376 -0.207 -0.426 8
-0.316 -0.16 -0.371 9
-0.211 -0.118 -0.354 8
-0.087 -0.065 -0.296 8
0.033 -0.006 -0.158 9
0.134 0.015 0.06 8
0.121 0.014 0.054 9
0.212 0.003 0.242 6
0.304 -0.03 0.326 10
0.355 -0.072 0.339 9
0.321 -0.096 0.271 8
0.21 -0.102 0.101 8
0.08 -0.085 -0.155 9
0.072 -0.076 -0.139 8
-0.041 -0.052 -0.388 9
-0.149 -0.025 -0.608 8
-0.222 0.013 -0.82 8
-0.238 0.051 -0.923 9
-0.193 0.065 -0.838 8
-0.174 0.058 -0.754 7
-0.075 0.035 -0.538 10
0.026 0.008 -0.296 8
0.102 0.008 -0.042 9
0.137 0.015 0.221 8
0.112 0.07 0.421 9
0.046 0.177 0.474 8
-0.048 0.254 0.327 8
-0.043 0.228 0.294 9
-0.138 0.27 0.066 8
-0.214 0.293 -0.12 9
-0.23 0.294 -0.271 8
-0.17 0.282 -0.406 7
-0.077 0.266 -0.494 10
0.002 0.251 -0.47 8
0.002 0.226 -0.423 9
0.042 0.22 -0.292 8
0.057 0.224 -0.157 8
0.042 0.239 -0.074 9
0.011 0.274 -0.007 8
-0.004 0.309 0.087 9
0.017 0.309 0.232 8
0.015 0.278 0.208 8
0.084 0.223 0.348 9
0.141 0.185 0.397 6
0.162 0.206 0.311 10
0.155 0.272 0.219 9
0.096 0.376 0.172 8
0.011 0.457 0.081 9
0.01 0.411 0.073 8
-0.096 0.467 -0.048 8
-0.214 0.519 -0.16 9
-0.328 0.561 -0.193 8
-0.396 0.572 -0.11 9
-0.34 0.546 0.078 8
-0.16 0.479 0.317 8
-0.144 0.431 0.286 7
0.098 0.287 0.475 10
0.354 0.079 0.556 9
0.593 -0.151 0.56 8
0.737 -0.345 0.51 8
0.712 -0.434 0.437 9
0.539 -0.455 0.402 8
0.485 -0.41 0.361 8
0.235 -0.396 0.383 9
-0.015 -0.34 0.424 8
-0.169 -0.286 0.42 9
-0.164 -0.281 0.336 8
-0.009 -0.31 0.124 7
0.19 -0.338 -0.197 10
0.171 -0.305 -0.178 8
0.274 -0.289 -0.41 9
0.252 -0.249 -0.461 8
0.158 -0.214 -0.347 8
0.03 -0.184 -0.128 9
-0.08 -0.166 0.068 8
-0.139 -0.191 0.195 9
-0.125 -0.171 0.175 8
-0.16 -0.191 0.243 8
-0.188 -0.17 0.258 9
-0.199 -0.181 0.205 6
-0.207 -0.19 0.112 11
-0.236 -0.189 0.017 8
-0.285 -0.216 -0.108 8
-0.256 -0.194 -0.097 9
-0.297 -0.217 -0.282 8
-0.286 -0.237 -0.437 9
-0.215 -0.287 -0.534 8
-0.114 -0.352 -0.584 8
-0.01 -0.406 -0.577 9
0.086 -0.448 -0.551 8
0.078 -0.403 -0.496 8
0.152 -0.437 -0.465 7
0.177 -0.42 -0.423 10
0.155 -0.36 -0.395 9
0.106 -0.308 -0.398 8
0.047 -0.249 -0.41 8
-0.032 -0.15 -0.378 9
-0.029 -0.135 -0.34 8
-0.138 -0.015 -0.219 9
-0.218 0.064 -0.029 8
-0.202 0.078 0.151 8
-0.136 0.089 0.285 9
-0.064 0.094 0.396 8
-0.058 0.085 0.357 7
0.006 0.05 0.406 10
0.062 0.025 0.273 8
0.107 0.048 0.003 9
0.128 0.123 -0.3 8
0.102 0.235 -0.568 9
0.056 0.337 -0.706 8
0.028 0.407 -0.68 8
0.025 0.366 -0.612 9
0.002 0.427 -0.397 8
-0.047 0.517 -0.043 9
-0.113 0.608 0.321 8
-0.154 0.637 0.594 7
-0.145 0.627 0.719 10
-0.115 0.609 0.732 8
-0.103 0.548 0.659 8
-0.068 0.55 0.625 9
-0.016 0.552 0.555 8
0.039 0.544 0.501 9
0.121 0.543 0.506 8
0.243 0.539 0.517 8
0.353 0.535 0.498 9
0.318 0.481 0.448 8
0.379 0.474 0.416 9
0.383 0.451 0.373 6
0.31 0.422 0.315 10
0.165 0.39 0.233 9
0.0 0.351 0.108 8
-0.161 0.297 -0.09 9
-0.145 0.267 -0.081 8
-0.319 0.221 -0.305 8
-0.493 0.178 -0.443 9
-0.658 0.097 -0.413 8
-0.754 -0.035 -0.175 9
-0.723 -0.212 0.169 8
-0.561 -0.397 0.593 8
-0.504 -0.358 0.534 7
-0.223 -0.536 0.93 10
0.084 -0.743 1.113 8
0.305 -0.919 1.12 9
0.406 -0.969 0.904 8
0.413 -0.941 0.466 9
0.341 -0.883 -0.035 8
0.307 -0.794 -0.031 8
0.16 -0.702 -0.478 9
-0.033 -0.585 -0.755 8
-0.226 -0.492 -0.838 9
-0.372 -0.422 -0.793 8
-0.335 -0.38 -0.714 7
-0.527 -0.298 -0.489 10
-0.474 -0.268 -0.44 8
-0.512 -0.234 -0.289 9
-0.509 -0.229 -0.14 8
-0.426 -0.237 -0.003 8
-0.285 -0.231 0.117 9
-0.115 -0.238 0.201 8
0.042 -0.256 0.232 9
0.038 -0.23 0.208 8
0.154 -0.223 0.207 8
0.223 -0.179 0.183 9
0.254 -0.112 0.113 6
0.259 -0.048 -0.001 10
0.216 0.041 -0.177 9
0.122 0.122 -0.246 8
0.11 0.11 -0.221 9
0.065 0.072 -0.188 8
0.057 0.011 -0.284 8
0.027 0.027 -0.423 9
0.031 0.034 -0.499 8
0.064 0.0 -0.508 9
0.058 -0.048 -0.489 8
0.052 -0.043 -0.44 8
0.197 -0.085 -0.466 7
0.267 -0.169 -0.387 10
0.31 -0.26 -0.111 9
0.3 -0.263 0.145 8
0.27 -0.206 0.2 8
0.243 -0.185 0.108 9
0.207 -0.166 0.097 8
0.157 -0.065 -0.013 9
0.069 0.043 -0.109 8
-0.078 0.206 -0.199 8
-0.246 0.362 -0.268 9
-0.346 0.453 -0.267 8
-0.312 0.407 -0.241 7
-0.294 0.432 -0.201 10
-0.147 0.412 -0.17 8
0.04 0.363 -0.118 9
0.169 0.304 0.019 8
0.207 0.269 0.191 8
0.182 0.3 0.295 9
0.164 0.27 0.266 8
0.126 0.377 0.292 9
0.12 0.479 0.253 8
0.166 0.522 0.162 8
0.269 0.489 0.075 9
0.384 0.388 0.056 7
0.4 0.271 0.136 10
0.36 0.244 0.122 8
0.231 0.155 0.257 8
0.027 0.132 0.339 9
-0.168 0.173 0.273 8
-0.318 0.246 0.042 9
-0.415 0.334 -0.185 8
-0.502 0.431 -0.249 8
-0.452 0.388 -0.224 9
-0.523 0.487 -0.193 8
-0.447 0.542 -0.168 9
-0.208 0.517 -0.142 6
0.071 0.405 -0.093 10
0.315 0.272 -0.013 9
0.474 0.167 0.134 8
0.427 0.15 0.12 9
0.482 0.023 0.352 8
0.445 -0.149 0.701 8
0.319 -0.301 1.075 9
0.17 -0.408 1.322 8
0.063 -0.52 1.358 8
-0.007 -0.631 1.093 9
-0.006 -0.568 0.983 8
-0.041 -0.624 0.507 7
-0.052 -0.597 0.014 10
-0.078 -0.568 -0.339 8
-0.127 -0.559 -0.545 9
-0.174 -0.505 -0.644 8
-0.165 -0.424 -0.661 9
-0.148 -0.381 -0.595 8
-0.079 -0.348 -0.578 8
0.014 -0.375 -0.491 9
0.121 -0.426 -0.334 8
0.234 -0.434 -0.156 9
0.315 -0.38 0.022 8
0.283 -0.342 0.02 7
0.312 -0.265 0.144 10
0.316 -0.17 0.176 8
0.294 -0.023 0.104 9
0.227 0.128 -0.03 8
0.142 0.219 -0.155 8
0.056 0.262 -0.204 9
-0.027 0.263 -0.137 8
-0.024 0.236 -0.123 9
-0.089 0.206 0.016 8
-0.142 0.173 0.137 8
-0.177 0.128 0.178 9
-0.162 -0.017 0.17 6
-0.091 -0.245 0.112 10
-0.015 -0.421 -0.011 9
-0.014 -0.379 -0.01 8
0.017 -0.456 -0.123 9
-0.014 -0.43 -0.213 8
-0.113 -0.317 -0.268 8
-0.228 -0.157 -0.297 9
-0.267 -0.014 -0.363 8
-0.2 0.073 -0.413 9
-0.18 0.065 -0.371 8
-0.079 0.094 -0.317 8
0.005 0.099 -0.109 7
0.068 0.1 0.156 10
0.101 0.088 0.364 9
0.114 0.091 0.517 8
0.12 0.142 0.596 8
0.108 0.128 0.536 9
0.098 0.196 0.506 8
0.074 0.249 0.39 9
0.037 0.296 0.266 8
-0.003 0.34 0.166 8
-0.024 0.356 0.106 9
-0.032 0.335 0.103 8
-0.029 0.301 0.093 7
-0.023 0.254 0.117 10
-0.002 0.19 0.147 8
0.052 0.13 0.147 9
0.163 0.07 0.106 8
0.263 0.027 0.01 8
0.237 0.024 0.009 9
0.258 0.02 -0.2 8
0.215 0.042 -0.476 9
0.157 0.059 -0.713 8
0.119 0.068 -0.867 8
0.084 0.067 -0.876 9
0.076 0.06 -0.788 7
0.029 0.051 -0.657 10
-0.01 0.046 -0.399 8
-0.017 0.036 -0.039 8
0.013 0.015 0.257 9
0.078 0.005 0.349 8
0.162 -0.05 0.364 9
0.198 -0.142 0.388 8
0.178 -0.127 0.349 8
0.105 -0.143 0.296 9
-0.036 -0.078 0.156 8
-0.157 -0.006 -0.045 9
-0.218 0.034 -0.246 6
-0.208 0.037 -0.353 10
-0.155 0.003 -0.311 9
-0.139 0.003 -0.28 8
-0.088 -0.028 -0.121 8
-0.073 -0.033 0.051 9
-0.077 -0.024 0.14 8
-0.063 -0.019 0.103 9
-0.041 -0.066 0.01 8
-0.047 -0.128 -0.067 8
-0.042 -0.115 -0.06 9
-0.092 -0.087 -0.148 8
-0.185 0.008 -0.248 7
-0.294 0.084 -0.316 10
-0.354 0.127 -0.341 8
-0.329 0.14 -0.339 9
-0.242 0.134 -0.322 8
-0.218 0.121 -0.289 9
-0.12 0.105 -0.228 8
-0.036 0.079 -0.088 8
0.018 0.048 0.095 9
0.04 0.03 0.241 8
0.046 0.036 0.321 9
0.044 0.051 0.33 8
0.04 0.045 0.297 7
0.02 0.059 0.23 10
-0.026 0.078 0.122 8
-0.078 0.088 0.028 9
-0.084 0.074 -0.027 8
-0.061 0.045 -0.069 8
-0.041 0.027 -0.124 9
-0.037 0.024 -0.111 8
-0.033 0.025 -0.15 8
-0.035 0.024 -0.143 9
-0.022 0.015 -0.12 8
-0.003 0.016 -0.074 9
-0.023 0.028 0.016 6
-0.072 0.037 0.083 10
-0.065 0.033 0.075 9
-0.086 0.035 0.08 8
-0.058 0.029 0.046 9
-0.006 0.005 0.038 8
0.038 -0.028 0.077 8
0.059 -0.051 0.109 9
0.061 -0.045 0.116 8
0.055 -0.04 0.104 9
0.049 -0.016 0.079 8
0.03 0.007 0.019 8
0.002 0.026 -0.088 7
-0.028 0.044 -0.226 10
-0.05 0.069 -0.32 9
-0.046 0.073 -0.331 8
-0.041 0.065 -0.298 8
-0.013 0.033 -0.244 9
0.016 -0.003 -0.172 8
0.038 -0.01 -0.1 8
0.057 -0.005 -0.058 9
0.075 -0.015 -0.043 8
0.097 -0.026 -0.019 9
0.087 -0.024 -0.017 8
0.084 -0.015 -0.003 7
0.04 0.008 0.004 10
-0.036 0.032 -0.013 8
-0.093 0.054 -0.076 9
-0.094 0.055 -0.148 8
-0.084 0.032 -0.184 8
-0.068 0.029 -0.166 9
-0.042 0.003 -0.173 8
0.001 -0.008 -0.166 9
0.061 -0.028 -0.128 8
0.11 -0.056 -0.061 8
0.131 -0.071 0.025 9
0.118 -0.064 0.022 6
0.116 -0.069 0.072 11
0.084 -0.059 0.041 8
0.041 -0.03 -0.018 8
0.004 -0.011 -0.075 9
-0.02 0.007 -0.094 8
-0.043 0.032 -0.076 9
-0.038 0.029 -0.068 8
-0.061 0.042 0.006 8
-0.082 0.047 0.1 9
-0.091 0.062 0.132 8
-0.085 0.079 0.097 8
-0.072 0.092 0.02 7
-0.08 0.104 -0.035 10
-0.072 0.093 -0.031 9
-0.088 0.091 -0.036 8
-0.076 0.08 -0.024 8
-0.042 0.059 -0.012 9
-0.005 0.029 0.018 8
0.028 -0.001 0.038 9
0.056 -0.025 0.017 8
0.051 -0.023 0.015 8
0.07 -0.029 -0.018 9
0.07 -0.022 -0.039 8
0.041 0.009 -0.056 7
-0.002 0.056 -0.058 10
-0.033 0.09 -0.025 8
-0.03 0.104 0.058 9
-0.027 0.093 0.052 8
-0.005 0.085 0.171 9
0.015 0.054 0.258 8
0.042 0.011 0.267 8
0.076 -0.031 0.193 9
0.1 -0.062 0.095 8
0.1 -0.076 0.001 8
0.09 -0.068 0.001 9
0.073 -0.069 -0.088 7
0.048 -0.057 -0.147 10
0.016 -0.041 -0.149 8
-0.028 -0.025 -0.102 8
-0.071 -0.005 -0.042 9
-0.087 0.002 0.024 8
-0.078 0.002 0.021 9
-0.054 -0.012 0.035 8
-0.006 -0.037 -0.032 8
0.04 -0.058 -0.106 9
0.064 -0.07 -0.147 8
0.063 -0.07 -0.164 9
0.057 -0.063 -0.147 6
0.033 -0.048 -0.164 10
0.002 -0.033 -0.179 9
-0.016 -0.02 -0.164 8
-0.02 -0.013 -0.113 9
-0.01 -0.019 -0.054 8
0.014 -0.031 0.002 8
0.04 -0.043 0.063 9
0.036 -0.039 0.057 8
0.048 -0.036 0.068 9
0.041 -0.016 0.033 8
0.02 0.012 0.003 8
-0.009 0.043 -0.002 7
-0.036 0.072 0.007 10
-0.053 0.09 0.024 9
-0.048 0.081 0.021 8
-0.042 0.068 0.059 8
-0.013 0.031 0.087 9
0.03 -0.006 0.067 8
0.076 -0.041 0.015 8
0.099 -0.063 -0.037 9
0.072 -0.058 -0.078 8
0.064 -0.052 -0.07 9
-0.006 -0.026 -0.087 8
-0.095 0.019 -0.079 7
-0.175 0.081 -0.063 10
-0.202 0.121 -0.053 8
-0.158 0.106 -0.032 9
-0.142 0.096 0.023 8
-0.047 0.086 0.02 8
0.045 -0.013 0.119 9
0.095 -0.044 0.239 8
0.103 -0.053 0.313 9
0.086 -0.041 0.275 8
0.06 -0.015 0.172 8
0.054 -0.014 0.155 9
0.014 0.021 0.045 6
-0.039 0.069 -0.039 11
-0.081 0.102 -0.084 8
-0.096 0.08 -0.112 8
-0.085 0.026 -0.129 9
-0.058 -0.013 -0.142 8
-0.052 -0.012 -0.128 8
-0.018 -0.042 -0.14 9
0.012 -0.06 -0.148 8
0.035 -0.059 -0.137 9
# end
#Thu Feb 26 20:18:22 GMT+08:00 20152
