# Supplementary material for: Abnormal Gait Behavior Detection for Elderly Based on Enhanced Wigner-Ville Analysis and Cloud Incremental SVM Learning
Source: Hindawi journal article supplement (doi:10.1155/2016/5869238), 2016-01-01
Supplement: f1 [file 5869238.f1.zip › Supplementary Materials/Original Data/Rightward fall Ending lying/original__131.txt]

# Accelerometer Values
# filename:  original__131.txt
# Saving start time: Thu Feb 26 20:40:37 GMT+08:00 2015

# sensor resolution: 0.0095825195m/s^2
#Sensorvendor: KIONIX, name: KX023 Accelerometer, type: 1,version : 1, range 39.240005

# X value, Y value, Z value, time diff in ms
0.244 -0.223 0.031 9
0.22 -0.2 0.028 8
0.301 -0.214 -0.094 8
0.398 -0.208 -0.263 9
0.467 -0.195 -0.426 7
0.486 -0.179 -0.556 10
0.446 -0.16 -0.603 8
0.382 -0.145 -0.571 8
0.344 -0.13 -0.514 9
0.29 -0.123 -0.441 8
0.25 -0.122 -0.353 9
0.21 -0.12 -0.266 8
0.164 -0.104 -0.181 8
0.122 -0.092 -0.099 9
0.11 -0.082 -0.089 8
0.088 -0.092 -0.024 9
0.075 -0.12 0.062 6
0.067 -0.147 0.17 10
0.063 -0.144 0.257 9
0.023 -0.099 0.38 8
-0.073 -0.061 0.546 8
-0.066 -0.055 0.492 9
-0.168 -0.044 0.587 8
-0.25 -0.035 0.552 9
-0.321 -0.016 0.46 8
-0.362 -0.002 0.408 8
-0.362 -0.013 0.362 9
-0.291 -0.06 0.262 8
-0.262 -0.054 0.236 7
-0.134 -0.103 0.168 10
-0.015 -0.13 0.14 8
0.085 -0.154 0.078 9
0.154 -0.165 -0.024 8
0.13 -0.141 -0.131 9
-0.01 -0.065 -0.164 8
-0.009 -0.058 -0.148 8
-0.178 0.027 -0.079 9
-0.275 0.066 -0.006 8
-0.292 0.069 -0.021 9
-0.248 0.061 -0.107 8
-0.223 0.055 -0.096 7
-0.139 0.051 -0.195 10
-0.04 0.034 -0.265 8
0.049 -0.026 -0.294 8
0.13 -0.117 -0.29 9
0.188 -0.202 -0.27 8
0.203 -0.268 -0.259 9
0.184 -0.292 -0.257 8
0.165 -0.263 -0.231 8
0.122 -0.285 -0.2 9
0.052 -0.361 -0.154 8
0.002 -0.452 -0.129 9
-0.012 -0.506 -0.142 6
-0.022 -0.523 -0.182 10
-0.027 -0.519 -0.23 9
-0.024 -0.467 -0.207 8
-0.031 -0.468 -0.271 9
-0.055 -0.513 -0.361 8
-0.07 -0.588 -0.444 8
-0.057 -0.654 -0.478 9
-0.023 -0.71 -0.478 8
0.036 -0.777 -0.546 9
0.033 -0.699 -0.492 8
0.105 -0.779 -0.669 8
0.139 -0.849 -0.837 7
0.115 -0.906 -0.957 10
0.027 -0.914 -0.956 9
-0.107 -0.891 -0.784 8
-0.097 -0.801 -0.705 8
-0.204 -0.89 -0.465 9
-0.253 -1.127 -0.368 8
-0.254 -1.301 -0.529 8
-0.219 -1.297 -0.863 9
-0.166 -1.119 -1.207 8
-0.155 -0.81 -1.42 9
-0.139 -0.729 -1.278 8
-0.209 -0.43 -1.29 7
-0.394 -0.251 -1.096 10
-0.665 -0.221 -0.822 8
-0.874 -0.203 -0.518 9
-0.948 -0.165 -0.254 8
-0.892 -0.204 -0.149 8
-0.803 -0.183 -0.134 9
-0.65 -0.263 -0.218 8
-0.433 -0.333 -0.359 9
-0.189 -0.406 -0.443 8
0.051 -0.49 -0.495 8
0.193 -0.519 -0.581 9
0.173 -0.467 -0.522 6
0.131 -0.313 -0.604 11
-0.088 -0.03 -0.644 8
-0.301 0.276 -0.607 8
-0.456 0.539 -0.445 9
-0.789 0.478 -0.367 8
-0.942 0.304 -0.334 8
-0.848 0.273 -0.243 9
-0.524 0.356 -0.219 8
-0.097 0.455 -0.255 9
0.261 0.491 -0.373 8
0.518 0.515 -0.413 8
0.605 0.457 -0.299 7
0.498 0.322 -0.116 10
0.449 0.29 -0.105 9
0.16 0.263 0.029 8
-0.173 0.493 0.168 8
-0.448 0.82 0.454 9
-0.62 1.019 0.954 8
-0.581 0.976 1.556 9
-0.359 0.73 2.127 8
-0.323 0.657 1.914 8
-0.178 0.453 2.493 9
-0.4 0.429 3.112 8
-1.039 0.533 3.801 7
-1.863 0.732 4.504 10
-2.368 0.932 5.014 8
-2.177 1.032 5.021 9
-1.959 0.929 4.519 8
-1.301 0.989 4.066 8
-0.61 1.252 3.391 9
-0.211 1.768 2.776 8
-0.134 2.228 2.534 9
-0.288 2.436 2.653 8
-0.483 2.356 2.878 8
-0.435 2.12 2.59 9
-0.406 1.828 2.754 7
-0.176 1.357 2.642 10
0.188 0.862 2.191 8
0.608 0.513 1.492 8
0.914 0.36 0.799 9
0.822 0.324 0.719 8
1.061 0.342 0.046 9
1.262 0.528 -0.749 8
1.292 0.859 -1.378 8
1.127 1.093 -1.622 9
0.915 1.074 -1.513 8
0.776 0.792 -1.075 9
0.699 0.713 -0.968 6
0.679 0.25 -0.449 10
0.809 -0.294 -0.19 9
1.141 -0.792 -0.322 8
1.565 -0.938 -0.794 9
1.529 -0.498 -1.504 8
0.516 0.294 -1.751 8
0.465 0.265 -1.576 9
-1.194 0.927 -0.658 8
-2.868 1.083 1.312 8
-3.969 0.582 3.592 9
-4.062 -0.203 5.463 8
-3.656 -0.183 4.917 7
-2.003 -2.195 5.976 10
-1.803 -1.976 5.379 8
-0.073 -2.207 3.67 9
1.462 -1.853 1.322 8
2.209 -1.333 -0.668 9
1.864 -1.201 -1.324 8
0.781 -1.812 -0.517 8
0.703 -1.631 -0.465 9
-0.31 -2.827 0.823 8
-0.798 -4.04 1.475 9
-0.711 -4.68 1.076 8
-0.338 -4.554 -0.129 7
0.079 -3.629 -1.366 10
0.014 -2.904 -2.659 8
0.013 -2.613 -2.393 9
-0.509 -2.311 -3.527 8
-0.88 -1.383 -3.699 8
-1.286 -0.297 -3.291 9
-1.703 0.333 -2.659 8
-1.882 0.52 -1.97 8
-1.795 0.309 -1.465 9
-1.616 0.278 -1.319 8
-1.221 -0.059 -1.096 9
-0.68 -0.215 -1.073 6
-0.28 -0.241 -1.099 10
-0.092 -0.136 -0.998 9
-0.154 0.021 -0.633 8
-0.499 0.135 -0.08 9
-0.449 0.122 -0.072 8
-0.854 0.227 0.48 8
-1.035 0.195 0.836 9
-0.907 -0.013 0.922 8
-0.461 -0.253 0.678 9
0.168 -0.431 0.01 8
0.151 -0.388 0.009 8
0.76 -0.491 -0.958 7
1.231 -0.424 -1.967 10
1.379 -0.138 -2.712 9
1.094 0.293 -2.842 8
0.553 0.695 -2.33 8
-0.005 0.982 -1.576 9
-0.005 0.884 -1.418 8
-0.298 1.002 -0.709 9
-0.17 0.844 -0.302 8
0.326 0.613 -0.325 8
1.015 0.486 -0.625 9
1.572 0.542 -1.223 8
1.415 0.487 -1.101 7
1.706 0.776 -1.82 10
1.673 1.106 -2.349 8
1.228 1.36 -2.332 9
0.371 1.479 -1.589 8
-0.719 1.523 -0.547 8
-1.752 1.667 0.33 9
-1.576 1.789 0.739 8
-1.419 1.61 0.665 9
-2.302 1.73 0.427 8
-1.578 1.883 -0.319 8
-0.361 1.94 -1.374 9
0.779 1.952 -2.427 7
1.735 1.495 -3.061 10
1.562 1.345 -2.755 8
2.335 0.736 -2.748 8
2.757 0.75 -1.843 9
2.912 0.969 -0.377 8
2.964 0.818 0.995 9
2.804 0.142 2.144 8
2.315 -0.879 3.317 8
2.084 -0.791 2.986 9
1.44 -1.563 3.973 8
0.723 -1.731 4.143 9
-0.007 -1.36 3.603 6
-0.639 -0.807 2.938 10
-1.09 -0.434 2.178 9
-1.248 -0.058 1.171 8
-1.123 -0.052 1.054 8
-1.037 0.464 -0.087 9
-0.773 0.996 -1.112 8
-0.329 1.243 -1.712 9
0.24 0.939 -1.758 8
0.791 0.285 -1.447 8
0.712 0.257 -1.302 9
1.178 -0.306 -0.957 8
1.497 -0.574 -0.744 7
1.6 -0.597 -0.69 10
1.566 -0.529 -0.701 8
1.437 -0.392 -0.775 9
1.183 -0.099 -0.852 8
1.065 -0.089 -0.767 9
0.707 0.199 -0.763 8
0.385 0.321 -0.664 8
0.169 0.37 -0.524 9
-0.036 0.401 -0.414 8
-0.153 0.363 -0.353 9
-0.095 0.251 -0.348 8
-0.086 0.226 -0.313 7
0.034 0.135 -0.37 10
0.102 0.164 -0.373 8
0.006 0.244 -0.13 8
-0.205 0.26 0.341 9
-0.346 0.168 0.794 8
-0.328 0.061 0.98 9
-0.295 0.054 0.882 8
-0.172 0.069 0.748 8
-0.037 0.149 0.446 9
0.082 0.182 0.186 8
0.172 0.131 0.085 9
0.154 0.117 0.077 6
0.135 -0.099 0.161 10
0.121 -0.089 0.145 9
-0.135 -0.04 0.175 8
-0.491 0.082 0.139 9
-0.792 0.174 0.097 8
-0.967 0.245 0.105 8
-1.02 0.209 0.112 9
-0.918 0.188 0.1 8
-0.83 -0.016 0.133 9
-0.585 -0.25 0.16 8
-0.28 -0.367 0.064 8
0.012 -0.315 -0.253 7
0.234 -0.17 -0.711 10
0.295 -0.027 -0.988 9
0.266 -0.024 -0.889 8
0.114 0.088 -0.875 8
-0.179 0.144 -0.646 9
-0.477 0.136 -0.308 8
-0.687 0.102 0.018 9
-0.785 0.078 0.17 8
-0.662 0.522 0.447 8
-0.595 0.47 0.402 9
-0.582 0.488 0.308 8
-0.638 -0.082 -0.149 7
-0.337 -0.133 -0.125 10
-0.041 -0.044 0.075 8
0.063 -0.027 0.237 9
0.056 -0.013 0.343 8
0.051 -0.012 0.309 8
-0.037 -0.007 0.481 9
-0.329 0.013 0.751 8
-0.687 0.079 0.911 9
-1.008 0.221 0.923 8
-1.233 0.332 0.875 8
-1.109 0.298 0.788 9
-1.185 0.268 0.727 6
-1.121 0.18 0.645 11
-0.929 0.086 0.481 8
-0.593 0.001 0.18 8
-0.261 -0.051 -0.213 9
0.025 -0.083 -0.664 8
0.022 -0.075 -0.597 9
0.334 -0.126 -0.972 8
0.643 -0.257 -1.143 8
0.932 -0.44 -1.176 9
1.166 -0.548 -1.088 8
1.291 -0.486 -0.841 8
1.162 -0.437 -0.757 7
1.2 -0.277 -0.348 10
1.107 -0.118 0.019 9
0.888 -0.01 0.073 8
0.723 0.065 -0.084 8
0.655 0.21 -0.346 9
0.638 0.402 -0.639 8
0.574 0.362 -0.803 9
0.627 0.326 -0.722 8
0.722 0.354 -0.707 8
0.875 0.122 -0.57 9
1.044 -0.091 -0.398 8
1.03 -0.285 -0.237 7
0.794 -0.337 -0.062 10
0.715 -0.303 -0.056 8
0.479 -0.279 0.197 9
0.351 -0.394 0.468 8
0.27 -0.58 0.723 9
0.145 -0.775 1.004 8
-0.11 -0.949 1.215 8
-0.419 -0.966 1.277 9
-0.377 -0.869 1.15 8
-0.58 -0.716 1.166 8
-0.63 -0.528 1.104 9
-0.576 -0.454 0.98 7
-0.474 -0.504 0.893 10
-0.352 -0.529 0.818 8
-0.24 -0.452 0.712 8
-0.216 -0.406 0.64 9
-0.153 -0.263 0.446 8
-0.138 -0.073 0.13 9
-0.158 0.12 -0.21 8
-0.167 0.308 -0.442 8
-0.16 0.417 -0.517 9
-0.144 0.375 -0.465 8
-0.167 0.394 -0.422 9
-0.247 0.406 -0.246 6
-0.331 0.419 -0.068 10
-0.326 0.411 -0.119 9
-0.203 0.422 -0.432 8
-0.016 0.48 -0.801 9
-0.014 0.432 -0.721 8
0.151 0.483 -0.924 8
0.275 0.482 -0.939 9
0.36 0.447 -0.845 8
0.405 0.399 -0.732 9
0.395 0.365 -0.673 8
0.285 0.349 -0.653 8
0.257 0.314 -0.587 7
0.114 0.312 -0.58 10
0.042 0.293 -0.614 8
0.062 0.273 -0.67 9
0.132 0.267 -0.639 8
0.261 0.237 -0.536 9
0.408 0.183 -0.416 8
0.367 0.165 -0.375 8
0.477 0.111 -0.234 9
0.495 0.063 -0.123 8
0.396 0.052 -0.027 9
0.224 0.067 0.089 8
0.201 0.06 0.08 7
0.081 0.068 0.15 10
0.11 0.066 0.14 8
0.196 0.058 0.066 9
0.265 0.045 0.027 8
0.306 0.012 0.067 8
0.313 -0.02 0.162 9
0.275 -0.031 0.301 8
0.248 -0.028 0.271 9
0.181 -0.013 0.334 8
0.109 0.015 0.256 8
-0.015 0.038 0.155 9
-0.222 0.239 -0.213 6
-0.439 0.305 -0.418 11
-0.523 0.124 -0.172 8
-0.47 0.112 -0.155 8
-0.462 0.041 0.024 9
-0.43 0.039 0.023 8
-0.295 0.101 -0.142 8
-0.085 0.157 -0.322 9
0.064 0.137 -0.369 8
0.092 0.081 -0.275 9
0.083 0.073 -0.248 8
0.029 0.047 -0.092 8
-0.04 0.057 0.059 7
-0.113 0.11 0.147 10
-0.211 0.195 0.183 9
-0.274 0.191 0.191 8
-0.246 0.172 0.172 8
-0.231 0.057 0.137 9
-0.183 -0.021 0.035 8
-0.144 0.003 -0.084 9
-0.111 0.032 -0.142 8
-0.112 -0.003 -0.063 8
-0.192 -0.063 0.1 9
-0.172 -0.057 0.09 8
-0.28 -0.083 0.195 7
-0.339 -0.079 0.229 10
-0.321 -0.086 0.224 8
-0.22 -0.1 0.168 9
-0.075 -0.103 0.092 8
0.023 -0.095 0.018 8
0.02 -0.085 0.016 9
0.035 -0.065 -0.05 8
0.002 -0.034 -0.117 9
-0.071 0.022 -0.178 8
-0.156 0.113 -0.219 8
-0.226 0.221 -0.235 9
-0.203 0.199 -0.211 7
-0.258 0.313 -0.2 10
-0.285 0.365 -0.153 8
-0.262 0.341 -0.12 8
-0.188 0.281 -0.13 9
-0.112 0.228 -0.138 8
-0.072 0.207 -0.123 9
-0.065 0.186 -0.111 8
-0.057 0.156 -0.048 8
-0.047 0.078 0.059 9
-0.026 -0.038 0.11 8
-0.004 -0.123 0.052 9
0.034 -0.12 -0.032 6
0.071 -0.079 -0.073 10
0.064 -0.071 -0.066 9
0.081 -0.085 -0.045 8
0.094 -0.146 0.018 9
0.102 -0.159 0.083 8
0.078 -0.11 0.129 8
0.025 -0.052 0.144 9
0.004 -0.015 0.088 8
0.003 -0.013 0.079 8
0.029 -0.007 -0.018 9
0.07 -0.009 -0.096 8
0.116 0.019 -0.132 7
0.109 0.03 -0.111 10
0.01 0.018 0.01 8
-0.132 0.075 0.177 9
-0.119 0.067 0.159 8
-0.252 0.177 0.223 9
-0.335 0.261 0.159 8
-0.373 0.333 0.024 8
-0.403 0.428 -0.09 9
-0.42 0.501 -0.118 8
-0.378 0.45 -0.106 9
-0.331 0.406 -0.051 8
-0.211 0.249 0.068 7
-0.076 0.082 0.233 10
0.019 -0.029 0.342 8
0.046 -0.055 0.326 9
-0.002 -0.017 0.263 8
-0.002 -0.015 0.237 8
-0.102 0.036 0.171 9
-0.191 0.091 0.096 8
-0.232 0.127 0.044 8
-0.226 0.119 0.013 9
-0.156 0.078 0.003 8
-0.031 0.007 -0.013 9
-0.028 0.006 -0.011 6
0.116 -0.081 -0.041 10
0.246 -0.175 -0.022 9
0.351 -0.278 0.019 8
0.409 -0.346 0.029 9
0.415 -0.352 -0.011 8
0.396 -0.3 -0.099 8
0.356 -0.27 -0.089 9
0.327 -0.213 -0.174 8
0.294 -0.176 -0.23 9
0.256 -0.132 -0.241 8
0.216 -0.11 -0.212 8
0.194 -0.099 -0.19 7
0.181 -0.117 -0.142 10
0.201 -0.132 -0.095 9
0.24 -0.149 -0.055 8
0.279 -0.166 -0.029 8
0.3 -0.18 -0.009 9
0.275 -0.178 0.019 8
0.192 -0.153 0.044 9
0.172 -0.137 0.04 8
0.047 -0.084 0.015 8
-0.089 0.097 -0.14 9
-0.175 0.204 -0.276 8
-0.161 0.076 -0.22 7
-0.042 -0.075 -0.053 10
0.155 -0.167 0.103 8
0.14 -0.15 0.093 9
0.273 -0.162 0.134 8
0.208 -0.016 0.062 8
0.034 0.282 -0.056 9
-0.137 0.542 -0.128 8
-0.269 0.598 -0.053 9
-0.332 0.435 0.188 8
-0.298 0.391 0.169 8
-0.3 0.174 0.427 9
-0.258 0.058 0.503 7
-0.196 0.039 0.37 10
-0.123 0.055 0.176 8
-0.091 0.058 0.056 8
-0.082 0.052 0.05 9
-0.118 0.051 0.045 8
-0.174 0.052 0.103 9
-0.203 0.037 0.174 8
-0.194 0.024 0.228 8
-0.171 0.019 0.222 9
-0.137 -0.008 0.161 8
-0.124 -0.007 0.145 9
-0.101 -0.045 0.096 6
-0.094 -0.068 0.078 10
-0.069 -0.099 0.034 9
-0.012 -0.145 -0.067 8
0.046 -0.171 -0.181 8
0.068 -0.146 -0.264 9
0.062 -0.132 -0.237 8
0.047 -0.102 -0.277 9
0.026 -0.111 -0.271 8
0.015 -0.109 -0.223 8
0.024 -0.098 -0.167 9
0.029 -0.113 -0.139 8
0.026 -0.102 -0.125 7
0.004 -0.099 -0.11 10
-0.035 -0.035 -0.083 8
-0.078 0.06 -0.069 9
-0.107 0.125 -0.088 8
-0.109 0.147 -0.115 9
-0.091 0.143 -0.13 8
-0.081 0.129 -0.117 8
-0.069 0.132 -0.124 9
-0.088 0.179 -0.116 8
-0.135 0.252 -0.09 9
-0.207 0.315 -0.037 8
-0.275 0.336 0.035 7
-0.292 0.307 0.105 10
-0.263 0.276 0.094 8
-0.246 0.22 0.153 8
-0.216 0.172 0.184 9
-0.178 0.124 0.151 8
-0.114 0.061 0.075 9
-0.017 0.002 0.014 8
0.084 -0.063 0.01 8
0.075 -0.057 0.009 9
0.158 -0.172 0.051 8
0.199 -0.282 0.109 9
0.191 -0.292 0.165 6
0.148 -0.199 0.164 10
0.096 -0.072 0.125 9
0.047 0.019 0.111 8
0.043 0.017 0.1 9
0.008 0.053 0.092 8
-0.004 0.072 0.085 8
0.013 0.051 0.153 9
0.066 -0.019 0.269 8
0.163 -0.06 0.15 9
0.147 -0.054 0.135 8
0.267 0.07 -0.255 8
0.36 0.16 -0.683 7
0.381 0.029 -0.838 10
0.345 -0.172 -0.628 9
0.337 -0.326 -0.364 8
0.412 -0.372 -0.222 8
0.371 -0.334 -0.2 9
0.455 -0.327 -0.149 8
0.414 -0.283 -0.112 8
0.257 -0.172 -0.039 9
0.089 0.014 0.041 8
-0.008 0.183 0.107 9
-0.029 0.203 0.205 8
-0.026 0.182 0.185 7
0.002 0.076 0.343 10
0.021 -0.047 0.439 8
0.017 -0.08 0.353 9
-0.006 -0.034 0.153 8
-0.056 0.049 -0.03 8
-0.112 0.158 -0.138 9
-0.101 0.142 -0.124 8
-0.162 0.234 -0.173 9
-0.213 0.267 -0.183 8
-0.244 0.246 -0.165 8
-0.242 0.207 -0.106 9
-0.218 0.186 -0.096 6
-0.199 0.139 0.008 11
-0.158 0.078 0.125 8
-0.099 0.009 0.225 8
-0.046 -0.079 0.333 9
-0.018 -0.147 0.406 8
-0.022 -0.131 0.322 8
-0.057 -0.011 0.114 9
-0.052 -0.01 0.103 8
-0.084 0.15 -0.089 9
-0.093 0.257 -0.204 8
-0.087 0.291 -0.248 8
-0.067 0.269 -0.256 7
-0.041 0.246 -0.266 10
-0.008 0.248 -0.279 9
-0.007 0.223 -0.251 8
0.02 0.222 -0.231 8
0.026 0.168 -0.16 9
0.013 0.064 -0.053 8
0.0 -0.018 0.046 9
0.017 -0.069 0.064 8
0.015 -0.062 0.057 8
0.061 -0.099 0.0 9
0.131 -0.107 -0.069 8
0.196 -0.115 -0.11 7
0.208 -0.13 -0.114 10
0.196 -0.133 -0.103 8
0.194 -0.136 -0.105 9
0.174 -0.123 -0.094 8
0.195 -0.127 -0.114 8
0.244 -0.143 -0.151 9
0.287 -0.166 -0.199 8
0.29 -0.181 -0.284 9
0.244 -0.186 -0.39 8
0.152 -0.165 -0.468 8
0.137 -0.149 -0.422 9
0.022 -0.035 -0.427 7
-0.125 0.172 -0.254 10
-0.31 0.309 0.079 8
-0.513 0.272 0.465 8
-0.652 0.167 0.727 9
-0.654 0.083 0.689 8
-0.589 0.075 0.62 9
-0.469 0.037 0.367 8
-0.283 0.052 0.101 8
-0.1 0.068 -0.082 9
0.045 0.047 -0.135 8
0.117 -0.045 -0.021 9
0.105 -0.04 -0.019 6
0.11 -0.154 0.178 10
0.078 -0.215 0.365 9
0.029 -0.182 0.431 8
-0.022 -0.005 0.327 9
-0.083 0.214 0.141 8
-0.134 0.339 -0.017 8
-0.121 0.305 -0.015 9
-0.268 0.377 -0.228 8
-0.526 0.402 -0.693 8
-0.585 0.415 -0.822 9
-0.362 0.304 -0.424 8
-0.1 0.053 0.009 7
0.008 -0.189 0.332 10
0.007 -0.17 0.298 9
0.036 -0.208 0.398 8
0.083 -0.006 0.318 8
0.109 0.106 0.226 9
0.123 0.012 0.233 8
0.132 -0.17 0.297 8
0.142 -0.261 0.317 9
0.128 -0.235 0.285 8
# end
#Thu Feb 26 20:40:43 GMT+08:00 20150
