# Supplementary material for: Abnormal Gait Behavior Detection for Elderly Based on Enhanced Wigner-Ville Analysis and Cloud Incremental SVM Learning
Source: Hindawi journal article supplement (doi:10.1155/2016/5869238), 2016-01-01
Supplement: f1 [file 5869238.f1.zip › Supplementary Materials/Original Data/Rightward fall Ending lying/original__132.txt]

# Accelerometer Values
# filename:  original__132.txt
# Saving start time: Thu Feb 26 20:40:48 GMT+08:00 2015

# sensor resolution: 0.0095825195m/s^2
#Sensorvendor: KIONIX, name: KX023 Accelerometer, type: 1,version : 1, range 39.240005

# X value, Y value, Z value, time diff in ms
0.0 0.009 0.096 9
-0.06 0.023 0.093 8
-0.063 0.023 0.043 8
-0.039 0.021 -0.011 9
-0.019 0.021 -0.048 8
-0.019 0.022 -0.053 9
-0.017 0.02 -0.048 8
-0.041 0.019 0.0 8
-0.061 0.01 0.08 9
-0.054 -0.004 0.151 6
-0.017 -0.022 0.179 10
0.041 -0.034 0.164 9
0.106 -0.044 0.127 8
0.095 -0.04 0.114 9
0.146 -0.054 0.066 8
0.162 -0.044 -0.001 8
0.146 -0.014 -0.099 9
0.113 0.01 -0.189 8
0.086 0.026 -0.194 9
0.058 0.032 -0.135 8
0.052 0.029 -0.121 8
0.04 0.031 -0.077 7
0.065 0.035 -0.062 10
0.102 0.03 -0.056 9
0.13 0.017 -0.036 8
0.165 -0.004 -0.025 8
0.219 -0.035 -0.027 9
0.197 -0.031 -0.024 8
0.264 -0.051 -0.043 9
0.304 -0.052 -0.105 8
0.323 -0.043 -0.186 8
0.347 -0.023 -0.273 9
0.355 0.0 -0.395 8
0.32 0.0 -0.356 7
0.331 0.018 -0.487 10
0.355 0.021 -0.584 8
0.363 0.019 -0.611 9
0.36 -0.019 -0.496 8
0.345 -0.128 -0.365 8
0.316 -0.221 -0.358 9
0.284 -0.199 -0.323 8
0.249 -0.257 -0.4 9
0.213 -0.318 -0.469 8
0.191 -0.344 -0.477 8
0.176 -0.374 -0.451 9
0.168 -0.417 -0.419 7
0.154 -0.406 -0.405 10
0.139 -0.365 -0.364 8
0.111 -0.292 -0.41 8
0.063 -0.22 -0.538 9
0.015 -0.239 -0.654 8
-0.024 -0.304 -0.699 9
-0.019 -0.368 -0.709 8
0.0 -0.455 -0.68 8
0.0 -0.409 -0.612 9
-0.014 -0.53 -0.567 8
-0.032 -0.703 -0.568 9
-0.052 -0.874 -0.645 6
-0.102 -0.975 -0.705 10
-0.221 -1.012 -0.685 9
-0.374 -1.035 -0.623 8
-0.337 -0.931 -0.56 8
-0.431 -1.055 -0.521 9
-0.407 -1.22 -0.538 8
-0.267 -1.342 -0.67 9
-0.049 -1.315 -0.893 8
0.124 -1.135 -1.075 8
0.111 -1.021 -1.279 9
0.206 -0.919 -1.151 8
0.292 -0.587 -1.503 7
0.416 -0.378 -1.939 10
0.558 -0.19 -2.3 8
0.647 -0.058 -2.464 9
0.675 -0.007 -2.412 8
0.607 -0.007 -2.17 9
0.612 -0.011 -1.828 8
0.499 -0.118 -1.191 8
0.247 -0.407 -0.561 9
0.037 -0.548 -0.028 8
-0.032 -0.348 0.438 9
-0.093 -0.12 0.621 8
-0.084 -0.108 0.559 7
-0.264 0.046 0.513 10
-0.458 0.168 0.454 8
-0.597 0.195 0.431 9
-0.731 0.1 0.428 8
-0.824 0.091 0.587 8
-0.802 0.111 1.005 9
-0.721 0.1 0.904 8
-0.64 -0.127 1.252 9
-0.482 -0.466 1.24 8
-0.248 -0.576 1.012 8
-0.138 -0.364 0.799 9
-0.124 -0.328 0.719 6
-0.345 0.188 1.018 10
-0.31 0.169 0.916 9
-0.212 0.225 1.431 8
0.036 0.125 1.817 9
0.242 0.155 2.038 8
0.173 0.47 2.147 8
-0.189 1.019 2.145 9
-0.17 0.917 1.931 8
-0.663 1.553 2.115 9
-1.151 2.027 2.52 8
-1.419 2.249 2.927 8
-1.281 2.156 3.346 7
-0.683 1.721 3.654 10
0.265 1.225 3.488 9
0.238 1.102 3.139 8
1.117 0.929 2.55 8
1.51 1.185 1.783 9
1.361 1.697 1.219 8
0.875 2.173 1.028 8
0.332 2.389 1.148 9
-0.062 2.272 1.401 8
-0.056 2.045 1.261 9
-0.132 1.68 1.376 8
0.173 1.287 1.347 7
0.757 1.057 1.204 10
1.506 0.967 0.84 8
2.268 0.969 0.433 9
2.77 0.998 0.284 8
2.493 0.898 0.255 8
2.553 1.049 0.325 9
1.989 1.279 0.459 8
0.988 1.522 0.483 9
0.031 2.041 0.4 8
-0.869 2.914 0.425 8
-2.229 3.303 1.158 9
-2.006 2.972 1.042 7
-3.466 2.502 3.32 10
-4.28 1.559 6.413 8
-4.449 0.28 8.64 8
-4.183 -1.25 9.353 9
-3.426 -2.316 7.992 8
-3.083 -2.084 7.193 9
-1.521 -1.961 3.997 8
0.549 -1.109 0.155 8
2.449 -0.341 -3.278 9
3.539 0.094 -5.18 8
3.218 0.096 -5.081 8
2.896 0.087 -4.573 7
1.478 -0.265 -3.049 10
-0.224 -0.778 -0.918 9
-1.535 -1.547 1.076 8
-2.113 -2.691 2.202 8
-1.919 -3.809 2.005 9
-0.981 -4.296 0.465 8
0.437 -4.095 -1.958 9
0.394 -3.686 -1.762 8
1.575 -3.032 -3.992 8
2.113 -2.569 -5.173 9
1.838 -2.446 -5.061 8
0.664 -2.226 -3.961 7
-0.817 -1.883 -2.662 10
-1.983 -1.428 -1.82 8
-1.784 -1.285 -1.638 9
-2.476 -0.97 -1.424 8
-2.648 -0.872 -1.633 9
-2.214 -0.793 -2.148 8
-1.4 -0.662 -2.917 8
-0.668 -0.542 -3.7 9
-0.132 -0.399 -4.161 8
-0.118 -0.359 -3.745 9
-0.043 -0.237 -3.919 8
-0.505 -0.052 -3.67 7
-1.142 0.243 -2.938 10
-1.783 0.441 -1.998 8
-2.432 0.336 -0.996 8
-2.189 0.302 -0.896 9
-2.512 -0.049 -0.011 8
-2.209 -0.431 0.495 9
-1.514 -0.571 0.304 8
-0.685 -0.237 -0.506 8
-0.011 0.581 -1.436 9
0.356 1.608 -2.094 8
0.32 1.447 -1.885 9
0.415 2.341 -2.058 6
0.405 2.629 -1.64 10
0.407 2.075 -0.737 9
0.632 1.139 0.343 8
1.043 0.422 1.132 9
1.169 0.215 1.463 8
1.052 0.193 1.316 8
0.674 0.372 1.398 9
0.005 0.809 1.34 8
-0.691 1.498 1.141 9
-0.971 2.287 0.745 8
-0.598 2.975 0.402 8
-0.538 2.678 0.362 7
0.124 2.861 0.385 10
0.768 2.323 0.578 9
1.263 1.376 0.585 8
1.717 0.329 0.464 8
2.327 -0.693 0.375 9
2.922 -1.673 0.31 8
3.546 -2.582 0.539 8
3.192 -2.324 0.485 9
3.745 -2.937 0.934 8
3.345 -3.111 1.099 9
2.078 -2.817 1.156 8
0.754 -2.012 1.36 7
-0.337 -1.141 1.451 10
-0.304 -1.027 1.355 8
-1.135 -0.281 1.219 9
-1.566 0.438 1.026 8
-1.357 0.934 0.675 8
-0.601 1.056 0.228 9
0.291 0.848 -0.197 8
1.092 0.443 -0.533 9
0.982 0.399 -0.479 8
1.564 0.047 -0.679 8
1.766 -0.072 -0.77 9
1.642 0.016 -0.787 6
1.425 0.156 -0.702 11
1.261 0.144 -0.551 8
1.141 -0.042 -0.324 8
1.027 -0.038 -0.291 9
0.931 -0.292 0.074 8
0.819 -0.448 0.36 8
0.686 -0.477 0.326 9
0.571 -0.42 0.065 8
0.472 -0.295 -0.169 9
0.375 -0.244 -0.23 8
0.337 -0.219 -0.207 8
0.242 -0.167 -0.15 7
0.134 0.063 -0.055 10
0.043 0.187 0.001 9
-0.008 0.101 -0.07 8
-0.057 0.021 -0.307 8
-0.091 -0.007 -0.701 9
-0.082 -0.006 -0.631 8
-0.049 -0.06 -0.978 9
0.03 -0.199 -1.043 8
0.107 -0.38 -0.753 8
0.119 -0.607 -0.179 9
-0.003 -0.847 0.493 8
-0.002 -0.762 0.444 7
-0.25 -0.898 0.926 10
-0.471 -0.855 1.121 8
-0.651 -0.691 1.071 9
-0.772 -0.5 0.826 8
-0.74 -0.381 0.544 9
-0.591 -0.429 0.32 8
-0.531 -0.386 0.288 8
-0.373 -0.555 0.251 9
-0.278 -0.717 0.365 8
-0.24 -0.832 0.505 8
-0.229 -0.919 0.626 9
-0.21 -0.969 0.614 7
-0.226 -0.956 0.523 10
-0.203 -0.861 0.471 8
-0.377 -0.766 0.51 8
-0.692 -0.541 0.698 9
-1.018 -0.27 0.894 8
-1.255 -0.019 1.028 9
-1.362 0.147 1.189 8
-1.291 0.143 1.364 8
-1.162 0.129 1.228 9
-0.969 0.062 1.219 8
-0.78 0.047 0.963 9
-0.617 0.109 0.649 6
-0.46 0.156 0.412 10
-0.4 0.099 0.292 9
-0.36 0.089 0.263 8
-0.517 -0.051 0.297 9
-0.745 -0.266 0.406 8
-0.849 -0.469 0.574 8
-0.912 -0.49 0.832 9
-1.067 -0.334 0.987 8
-1.182 -0.168 0.886 8
-1.064 -0.151 0.797 9
-0.984 -0.075 0.46 8
-0.711 -0.076 0.066 7
-0.304 -0.136 -0.218 10
0.191 -0.223 -0.459 8
0.776 -0.221 -0.696 9
1.247 -0.05 -0.864 8
1.122 -0.045 -0.777 9
1.261 0.26 -0.852 8
1.008 0.613 -0.794 8
0.598 0.949 -0.589 9
0.329 1.209 -0.459 8
0.314 1.262 -0.476 9
0.603 1.082 -0.542 8
0.542 0.973 -0.487 7
1.034 0.722 -0.603 10
1.483 0.54 -0.642 8
1.73 0.434 -0.58 9
1.74 0.372 -0.532 8
1.434 0.418 -0.475 8
0.894 0.594 -0.36 9
0.805 0.534 -0.324 8
0.241 0.63 -0.082 9
-0.214 0.533 0.271 8
-0.459 0.349 0.557 8
-0.436 0.176 0.638 9
-0.392 0.159 0.574 6
-0.191 0.061 0.419 10
-0.013 0.049 0.041 9
0.016 0.135 -0.473 8
-0.086 0.282 -0.88 9
-0.205 0.325 -1.022 8
-0.265 0.194 -0.969 8
-0.335 0.063 -0.659 9
-0.302 0.056 -0.593 8
-0.391 0.077 -0.361 9
-0.497 0.186 -0.339 8
-0.624 0.2 -0.264 8
-0.703 0.143 -0.253 7
-0.639 0.1 -0.416 10
-0.363 0.013 -0.673 9
-0.327 0.012 -0.605 8
0.079 -0.081 -0.924 8
0.433 -0.134 -1.286 9
0.62 -0.149 -1.501 8
0.616 -0.051 -1.338 9
0.409 0.114 -0.938 8
0.368 0.154 -0.598 8
0.331 0.139 -0.538 9
0.102 -0.019 -0.325 8
0.057 -0.058 -0.37 7
0.209 -0.024 -0.575 10
0.268 -0.056 -0.597 8
0.174 0.006 -0.428 9
0.157 0.005 -0.385 8
0.015 0.059 -0.21 8
-0.023 0.078 -0.093 9
0.063 0.108 -0.144 8
0.218 0.159 -0.337 9
0.374 0.226 -0.525 8
0.442 0.297 -0.536 8
0.398 0.267 -0.482 9
0.346 0.362 -0.309 7
0.193 0.488 -0.034 10
-0.057 0.567 0.299 8
-0.297 0.577 0.622 8
-0.382 0.547 0.896 9
-0.304 0.498 1.024 8
-0.274 0.448 0.921 9
-0.095 0.4 0.795 8
0.098 0.343 0.449 8
0.294 0.275 0.096 9
0.495 0.187 -0.227 8
0.629 0.059 -0.392 9
0.566 0.053 -0.353 6
0.562 -0.191 -0.242 10
0.354 -0.349 -0.001 9
0.057 -0.244 0.194 8
-0.139 -0.09 0.249 8
-0.174 -0.016 0.135 9
-0.077 -0.012 -0.138 8
-0.069 -0.011 -0.124 9
0.135 -0.036 -0.373 8
0.288 -0.059 -0.422 8
0.255 -0.031 -0.297 9
0.128 0.084 -0.118 8
0.036 0.216 0.054 7
-0.009 0.292 0.193 10
-0.008 0.262 0.174 8
-0.031 0.317 0.179 9
-0.044 0.361 0.073 8
0.0 0.345 -0.026 9
-0.011 0.23 -0.183 8
-0.054 0.115 -0.345 8
-0.021 0.097 -0.446 9
-0.019 0.087 -0.401 8
0.023 0.035 -0.537 9
0.058 -0.06 -0.689 8
-0.002 -0.065 -0.776 7
-0.191 0.014 -0.772 10
-0.411 0.097 -0.73 8
-0.37 0.087 -0.657 9
-0.516 0.127 -0.591 8
-0.54 0.127 -0.575 8
-0.325 0.009 -0.517 9
-0.045 -0.072 -0.454 8
0.05 -0.008 -0.392 8
0.081 -0.002 -0.203 9
0.073 -0.001 -0.183 8
0.104 -0.073 0.141 9
0.087 -0.091 0.457 6
0.027 -0.053 0.673 10
0.0 -0.042 0.746 9
-0.014 -0.005 0.698 8
-0.045 0.07 0.612 9
-0.04 0.063 0.551 8
-0.037 0.103 0.489 8
0.018 0.083 0.45 9
0.083 0.055 0.401 8
0.093 0.063 0.345 9
-0.04 0.143 0.302 8
-0.302 0.328 0.253 8
-0.272 0.295 0.227 7
-0.497 0.507 0.188 10
-0.605 0.639 0.174 9
-0.616 0.641 0.147 8
-0.579 0.553 0.069 8
-0.525 0.471 -0.083 9
-0.473 0.424 -0.075 8
-0.4 0.331 -0.264 9
-0.321 0.164 -0.42 8
-0.235 0.016 -0.464 8
-0.11 -0.093 -0.4 9
0.019 -0.196 -0.298 8
0.017 -0.176 -0.268 7
0.101 -0.223 -0.123 10
0.066 -0.227 0.007 8
-0.058 -0.211 0.064 9
-0.212 -0.12 0.087 8
-0.346 0.018 0.057 8
-0.357 0.086 -0.09 9
-0.264 0.042 -0.301 8
-0.238 0.038 -0.271 9
-0.101 -0.031 -0.388 8
0.034 -0.089 -0.347 8
0.094 -0.14 -0.171 9
0.079 -0.16 0.032 6
0.052 -0.162 0.129 11
-0.001 -0.104 -0.009 8
-0.001 -0.094 -0.008 8
-0.112 0.025 -0.37 9
-0.188 0.056 -0.354 8
-0.158 -0.042 0.001 8
-0.089 -0.089 0.249 9
-0.084 -0.003 0.403 8
-0.089 0.177 0.408 9
-0.08 0.159 0.367 8
-0.018 0.349 0.296 8
0.0 0.44 0.188 7
-0.051 0.428 0.116 10
-0.099 0.358 0.172 9
-0.114 0.228 0.259 8
# end
#Thu Feb 26 20:40:51 GMT+08:00 2015.
