# Supplementary material for: Abnormal Gait Behavior Detection for Elderly Based on Enhanced Wigner-Ville Analysis and Cloud Incremental SVM Learning
Source: Hindawi journal article supplement (doi:10.1155/2016/5869238), 2016-01-01
Supplement: f1 [file 5869238.f1.zip › Supplementary Materials/Original Data/Rightward fall Ending lying/original__133.txt]

# Accelerometer Values
# filename:  original__133.txt
# Saving start time: Thu Feb 26 20:40:54 GMT+08:00 2015

# sensor resolution: 0.0095825195m/s^2
#Sensorvendor: KIONIX, name: KX023 Accelerometer, type: 1,version : 1, range 39.240005

# X value, Y value, Z value, time diff in ms
0.401 0.037 -0.823 9
0.442 -0.008 -0.811 6
0.46 -0.03 -0.765 11
0.472 -0.052 -0.708 8
0.425 -0.046 -0.637 8
0.424 -0.093 -0.582 9
0.386 -0.153 -0.523 8
0.315 -0.189 -0.442 8
0.194 -0.181 -0.283 9
-0.018 -0.161 0.023 8
-0.263 -0.194 0.365 9
-0.237 -0.175 0.329 8
-0.411 -0.249 0.577 8
-0.492 -0.318 0.749 7
-0.494 -0.349 0.844 10
-0.434 -0.313 0.861 9
-0.334 -0.26 0.835 8
-0.205 -0.239 0.732 8
-0.185 -0.215 0.659 9
-0.055 -0.174 0.45 8
0.027 -0.07 0.193 9
0.046 0.061 0.021 8
0.018 0.158 0.008 8
-0.022 0.148 0.085 9
-0.02 0.133 0.076 8
-0.054 0.033 0.126 7
-0.068 -0.053 0.09 10
-0.056 -0.076 -0.081 8
0.004 -0.066 -0.363 9
0.094 -0.078 -0.612 8
0.134 -0.11 -0.791 8
0.121 -0.099 -0.712 9
0.099 -0.064 -0.925 8
0.046 0.019 -1.199 9
-0.009 0.032 -1.399 8
-0.036 -0.041 -1.441 8
-0.032 -0.188 -1.379 9
-0.028 -0.169 -1.241 7
-0.018 -0.372 -1.031 10
-0.003 -0.536 -0.655 8
0.066 -0.68 -0.34 8
0.182 -0.838 -0.198 9
0.277 -0.901 -0.181 8
0.317 -0.836 -0.261 9
0.3 -0.735 -0.461 8
0.27 -0.662 -0.415 8
0.215 -0.585 -0.67 9
0.121 -0.546 -0.95 8
-0.031 -0.526 -1.199 9
-0.228 -0.474 -1.168 6
-0.394 -0.433 -0.846 10
-0.479 -0.521 -0.426 9
-0.431 -0.469 -0.384 8
-0.397 -0.739 -0.072 9
-0.218 -1.091 -0.021 8
0.012 -1.362 -0.154 8
0.101 -1.434 -0.303 9
0.057 -1.373 -0.339 8
0.051 -1.235 -0.305 8
0.024 -1.198 -0.219 9
0.079 -1.205 -0.116 8
0.193 -1.2 -0.077 7
0.295 -1.112 -0.102 10
0.356 -0.963 -0.143 8
0.373 -0.829 -0.137 9
0.336 -0.746 -0.123 8
0.338 -0.678 0.077 9
0.356 -0.758 0.428 8
0.344 -0.883 0.751 8
0.247 -0.828 1.052 9
0.077 -0.655 1.143 8
-0.087 -0.53 0.932 9
-0.079 -0.477 0.838 8
-0.195 -0.408 0.59 7
-0.252 -0.361 0.351 10
-0.218 -0.333 0.076 8
-0.096 -0.25 -0.189 9
0.05 -0.129 -0.371 8
0.113 -0.049 -0.288 8
0.101 -0.044 -0.259 9
0.084 -0.03 0.054 8
0.097 -0.135 0.32 9
0.235 -0.371 0.332 8
0.403 -0.459 0.068 8
0.422 -0.252 -0.169 9
0.38 -0.226 -0.152 6
0.288 0.016 -0.135 10
0.19 0.21 0.097 9
0.136 0.405 0.52 8
0.147 0.617 1.013 9
0.194 0.891 1.575 8
0.232 1.172 2.107 8
0.209 1.054 1.896 9
0.251 1.328 2.1 8
0.282 1.683 2.116 9
0.179 2.09 2.181 8
-0.163 2.448 2.389 8
-0.571 2.716 2.882 7
-0.747 2.777 3.337 10
-0.672 2.499 3.003 9
-0.584 2.368 3.127 8
-0.368 2.198 3.004 8
-0.149 2.119 2.545 9
-0.133 2.223 1.792 8
-0.379 2.536 1.175 9
-0.684 2.879 0.974 8
-0.616 2.591 0.877 8
-0.751 2.732 1.068 9
-0.644 2.526 1.494 8
-0.433 2.069 2.093 7
-0.215 1.581 2.625 10
-0.09 1.233 2.758 8
-0.081 0.959 2.482 9
-0.035 0.863 2.234 8
0.0 0.52 1.792 8
-0.008 0.202 1.362 9
-0.06 0.022 1.137 8
-0.113 -0.092 1.125 9
-0.139 -0.201 1.055 8
-0.125 -0.181 0.949 8
-0.115 -0.325 0.651 9
-0.107 -0.456 0.219 7
-0.141 -0.575 -0.344 10
-0.199 -0.755 -1.045 8
-0.277 -0.911 -1.574 8
-0.468 -0.96 -1.731 9
-0.421 -0.864 -1.558 8
-0.834 -0.847 -1.311 9
-1.358 -0.773 -0.833 8
-1.692 -0.569 -0.525 8
-1.741 -0.316 -0.348 9
-1.66 -0.175 0.054 8
-1.423 -0.212 0.543 8
-1.28 -0.19 0.488 7
-0.925 -0.582 0.679 10
-0.548 -1.179 0.637 9
-0.258 -1.831 0.268 8
-0.323 -2.523 -0.3 8
-0.427 -2.88 -0.58 9
-0.279 -2.852 -0.885 8
-0.251 -2.567 -0.797 9
-0.02 -2.487 -1.382 8
0.334 -2.514 -2.033 8
0.627 -2.623 -2.587 9
0.458 -2.613 -2.776 8
0.412 -2.352 -2.498 7
-0.767 -2.059 -2.478 10
-0.69 -1.853 -2.23 8
-1.063 -1.469 -2.292 9
-1.246 -1.077 -2.448 8
-1.265 -0.784 -2.299 9
-1.196 -0.578 -1.932 8
-1.039 -0.415 -1.595 8
-0.935 -0.373 -1.436 9
-0.847 -0.291 -1.126 8
-1.01 -0.172 -0.745 9
-1.144 0.18 -0.257 8
-1.289 0.646 -0.189 7
-1.552 1.074 -0.742 10
-1.664 1.421 -1.173 8
-1.498 1.279 -1.056 8
-1.488 1.496 -0.903 9
-1.39 1.459 -0.341 8
-1.144 1.238 0.355 9
-0.764 0.951 1.023 8
-0.412 0.682 1.422 8
-0.242 0.497 1.548 9
-0.218 0.447 1.393 8
-0.128 0.42 1.536 9
-0.185 0.457 1.602 6
-0.286 0.485 1.64 10
-0.196 0.519 1.521 9
0.136 0.488 1.098 8
0.586 0.367 0.6 9
0.527 0.33 0.54 8
0.792 0.19 0.141 8
0.899 0.11 -0.032 9
0.902 0.085 -0.04 8
0.805 0.138 0.1 9
0.571 0.219 0.326 8
0.514 0.197 0.293 8
0.173 0.251 0.604 7
-0.015 0.292 0.912 10
-0.011 0.277 0.956 8
0.093 0.223 0.887 9
0.254 0.151 0.75 8
0.381 0.031 0.515 9
0.343 0.028 0.464 8
0.431 -0.105 0.403 8
0.523 -0.279 0.48 9
0.717 -0.478 0.566 8
0.968 -0.647 0.524 9
1.202 -0.748 0.264 8
1.082 -0.673 0.237 7
1.303 -0.754 -0.048 10
1.442 -0.888 -0.273 8
1.424 -1.011 -0.493 9
1.195 -0.965 -0.683 8
0.863 -0.736 -0.773 8
0.625 -0.544 -0.798 9
0.501 -0.51 -0.858 8
0.451 -0.459 -0.772 9
0.374 -0.457 -0.878 8
0.305 -0.404 -0.904 8
0.226 -0.345 -0.81 9
0.085 -0.312 -0.67 6
-0.106 -0.323 -0.488 11
-0.095 -0.393 -0.292 8
-0.086 -0.354 -0.263 8
-0.075 -0.486 -0.068 9
0.065 -0.608 0.143 8
0.141 -0.666 0.343 9
0.159 -0.697 0.47 8
0.145 -0.702 0.531 8
0.13 -0.632 0.478 9
0.119 -0.584 0.47 8
0.121 -0.502 0.351 9
0.166 -0.422 0.06 6
0.293 -0.358 -0.323 10
0.431 -0.28 -0.69 9
0.488 -0.126 -0.955 8
0.439 -0.114 -0.86 8
0.427 0.071 -0.935 9
0.304 0.198 -0.831 8
0.001 0.308 -0.575 9
-0.337 0.517 -0.33 8
-0.604 0.685 -0.339 8
-0.782 0.754 -0.583 9
-0.704 0.679 -0.525 8
-0.603 0.783 -0.732 7
-0.272 0.801 -0.737 10
-0.007 0.691 -0.57 8
0.051 0.611 -0.255 9
-0.189 0.671 0.127 8
-0.649 0.768 0.475 9
-0.584 0.691 0.428 8
-0.924 0.733 0.763 8
-0.962 0.586 1.093 9
-0.786 0.215 1.391 8
-0.568 -0.213 1.578 8
-0.332 -0.576 1.547 9
-0.298 -0.519 1.393 7
0.059 -0.746 1.178 10
0.39 -0.842 0.893 8
0.543 -0.847 0.637 8
0.579 -0.81 0.446 9
0.607 -0.774 0.315 8
0.695 -0.766 0.183 9
0.626 -0.689 0.165 8
0.76 -0.741 -0.075 8
0.895 -0.777 -0.429 9
0.914 -0.667 -0.739 8
0.801 -0.488 -0.993 9
0.661 -0.327 -1.325 6
0.553 -0.165 -1.716 10
0.498 -0.148 -1.544 9
0.481 0.03 -1.905 8
0.575 0.185 -2.091 9
0.762 0.219 -2.073 8
1.016 0.105 -1.908 8
1.159 -0.052 -1.541 9
0.969 -0.147 -1.006 8
0.872 -0.132 -0.905 8
0.424 -0.141 -0.31 9
-0.148 -0.045 0.308 8
-0.739 0.071 0.88 7
-1.171 0.125 1.266 10
-1.295 0.086 1.378 8
-1.165 0.077 1.24 9
-0.891 0.022 1.111 8
-0.345 -0.043 0.762 9
0.167 -0.131 0.354 8
0.417 -0.14 0.067 8
0.28 -0.034 0.003 9
-0.133 0.137 0.11 8
-0.12 0.123 0.099 9
-0.593 0.276 0.229 8
-0.905 0.424 0.242 7
-0.985 0.575 0.088 10
-0.886 0.717 -0.171 8
-0.595 0.844 -0.386 9
-0.167 0.844 -0.383 8
-0.15 0.76 -0.344 8
0.265 0.618 -0.176 9
0.541 0.418 0.004 8
0.643 0.224 0.104 9
0.51 0.168 0.085 8
0.081 0.264 0.116 8
-0.428 0.375 0.412 9
-0.385 0.338 0.37 6
-0.7 0.39 0.867 11
-0.775 0.378 1.268 8
-0.606 0.353 1.231 8
-0.24 0.376 0.73 9
0.09 0.432 0.026 8
0.081 0.389 0.023 8
0.239 0.456 -0.585 9
0.273 0.562 -0.918 8
0.207 0.681 -1.043 9
-0.013 0.741 -0.969 8
-0.237 0.727 -0.637 8
-0.213 0.654 -0.573 7
-0.347 0.59 -0.087 10
-0.44 0.491 0.412 9
-0.414 0.389 0.857 8
-0.215 0.267 1.264 8
0.079 0.094 1.563 9
0.411 -0.059 1.647 8
0.69 -0.14 1.592 9
0.621 -0.126 1.433 8
0.765 -0.151 1.339 8
0.758 -0.109 1.232 9
0.663 -0.017 1.118 8
0.591 0.077 0.858 7
0.58 0.169 0.388 10
0.592 0.272 -0.17 8
0.532 0.245 -0.153 9
0.525 0.336 -0.616 8
0.438 0.38 -0.843 8
0.284 0.389 -0.878 9
0.159 0.361 -0.815 8
0.048 0.301 -0.766 9
0.044 0.271 -0.69 8
-0.107 0.227 -0.627 8
-0.236 0.208 -0.523 9
-0.287 0.194 -0.478 7
-0.289 0.18 -0.5 10
-0.226 0.168 -0.58 8
-0.19 0.178 -0.609 8
-0.171 0.16 -0.548 9
-0.115 0.152 -0.597 8
0.072 0.035 -0.588 9
0.174 -0.062 -0.433 8
0.122 -0.099 -0.433 8
0.069 -0.131 -0.651 9
0.01 -0.064 -0.859 8
0.009 -0.058 -0.773 9
-0.089 0.036 -0.798 6
-0.265 0.068 -0.659 10
-0.594 0.088 -0.524 9
-0.887 0.246 -0.573 8
-0.893 0.417 -0.829 9
-0.589 0.35 -0.945 8
-0.53 0.315 -0.851 8
-0.151 0.119 -0.763 9
0.264 -0.12 -0.557 8
0.597 -0.464 -0.264 8
0.635 -0.716 0.005 9
0.444 -0.698 0.343 8
0.4 -0.628 0.308 7
0.157 -0.547 0.632 10
0.02 -0.467 0.782 8
-0.08 -0.278 0.706 9
-0.273 -0.013 0.381 8
-0.435 0.185 -0.048 9
-0.33 0.243 -0.401 8
-0.297 0.219 -0.361 8
-0.012 0.119 -0.601 9
0.253 -0.076 -0.687 8
0.37 -0.208 -0.593 9
0.28 -0.179 -0.396 8
0.084 -0.004 -0.131 7
-0.058 0.167 0.088 10
-0.052 0.15 0.079 8
-0.079 0.233 0.146 9
0.007 0.254 0.066 8
0.118 0.244 -0.084 8
0.12 0.224 -0.184 9
0.063 0.169 -0.2 8
0.052 0.061 -0.157 8
0.047 0.055 -0.141 9
0.06 -0.065 -0.104 8
0.024 -0.094 -0.089 9
-0.089 0.0 -0.051 6
-0.219 0.087 0.084 10
-0.318 0.125 0.352 9
-0.286 0.112 0.316 8
-0.393 0.18 0.665 9
-0.496 0.311 1.027 8
-0.428 0.414 1.189 8
-0.181 0.387 0.978 9
0.024 0.265 0.516 8
0.128 0.14 0.037 9
0.115 0.126 0.033 8
0.15 0.047 -0.315 8
0.123 0.002 -0.526 7
0.046 -0.013 -0.642 10
-0.072 -0.014 -0.676 9
-0.215 -0.008 -0.648 8
-0.37 -0.002 -0.596 8
-0.333 -0.002 -0.536 9
-0.465 0.02 -0.482 8
-0.507 0.099 -0.41 9
-0.411 0.178 -0.309 8
-0.172 0.15 -0.178 8
0.074 0.057 -0.027 9
0.197 -0.004 0.11 8
0.178 -0.003 0.099 7
0.124 -0.028 0.216 10
-0.075 -0.032 0.312 8
-0.26 -0.033 0.374 9
-0.34 -0.039 0.369 8
-0.264 -0.05 0.281 8
-0.237 -0.045 0.252 9
-0.185 -0.1 0.237 8
-0.211 -0.116 0.337 9
-0.19 -0.063 0.308 8
-0.108 -0.032 0.15 8
0.034 -0.027 0.014 9
0.031 -0.025 0.013 7
0.156 -0.024 -0.118 10
0.204 -0.042 -0.239 8
0.152 -0.078 -0.323 8
0.054 -0.111 -0.319 9
-0.038 -0.158 -0.248 8
-0.156 -0.133 -0.167 9
-0.269 -0.041 -0.097 8
-0.242 -0.037 -0.087 8
-0.203 0.012 -0.09 9
0.019 0.011 -0.17 8
0.233 0.0 -0.232 9
0.242 0.001 -0.204 6
0.094 0.027 -0.151 10
-0.162 0.053 -0.137 9
-0.146 0.048 -0.123 8
-0.395 0.126 -0.063 8
-0.509 0.232 -0.021 9
-0.519 0.257 -0.025 8
-0.475 0.189 0.0 9
-0.426 0.115 -0.02 8
-0.383 0.104 -0.018 8
-0.307 0.075 -0.048 9
-0.133 0.029 -0.054 8
0.105 -0.024 -0.04 7
0.257 -0.062 0.042 10
0.282 -0.095 0.17 8
0.276 -0.126 0.224 9
0.248 -0.114 0.201 8
0.237 -0.103 0.189 9
0.207 -0.056 0.212 8
0.184 -0.014 0.292 8
0.247 0.009 0.39 9
0.372 0.009 0.437 8
0.446 -0.011 0.422 8
0.401 -0.01 0.38 9
0.353 -0.032 0.33 7
0.11 -0.022 0.226 10
-0.212 0.123 -0.062 8
-0.43 0.288 -0.565 8
-0.527 0.387 -0.65 9
-0.474 0.417 -0.177 8
-0.427 0.375 -0.16 9
-0.43 0.269 0.262 8
-0.308 0.14 0.501 8
-0.265 0.116 0.714 9
-0.334 0.181 0.883 8
-0.385 0.28 0.952 9
-0.346 0.252 0.857 6
-0.316 0.325 0.773 10
-0.235 0.23 0.481 9
-0.143 0.025 0.079 8
-0.103 -0.132 -0.292 9
# end
#Thu Feb 26 20:40:58 GMT+08:00 20157
