# Supplementary material for: Abnormal Gait Behavior Detection for Elderly Based on Enhanced Wigner-Ville Analysis and Cloud Incremental SVM Learning
Source: Hindawi journal article supplement (doi:10.1155/2016/5869238), 2016-01-01
Supplement: f1 [file 5869238.f1.zip › Supplementary Materials/Original Data/Rightward fall Ending lying/original__134.txt]

# Accelerometer Values
# filename:  original__134.txt
# Saving start time: Thu Feb 26 20:41:01 GMT+08:00 2015

# sensor resolution: 0.0095825195m/s^2
#Sensorvendor: KIONIX, name: KX023 Accelerometer, type: 1,version : 1, range 39.240005

# X value, Y value, Z value, time diff in ms
-0.156 0.046 -0.39 8
-0.283 0.15 -0.374 9
-0.381 0.303 -0.302 8
-0.342 0.273 -0.272 7
-0.407 0.379 -0.164 10
-0.428 0.402 -0.001 8
-0.413 0.377 0.137 8
-0.379 0.332 0.18 9
-0.391 0.298 0.171 8
-0.433 0.264 0.15 9
-0.389 0.238 0.135 8
-0.399 0.163 0.106 8
-0.356 0.043 0.121 9
-0.243 -0.112 0.185 8
-0.098 -0.249 0.206 9
0.0 -0.328 0.159 6
0.041 -0.345 0.086 10
0.037 -0.311 0.078 9
0.049 -0.301 0.026 8
0.058 -0.274 -0.035 9
0.077 -0.218 -0.119 8
0.116 -0.151 -0.149 8
0.181 -0.105 -0.137 9
0.252 -0.1 -0.168 8
0.227 -0.09 -0.151 9
0.273 -0.107 -0.241 8
0.298 -0.116 -0.312 8
0.313 -0.131 -0.274 7
0.307 -0.138 -0.203 10
0.275 -0.108 -0.169 9
0.248 -0.095 -0.095 8
0.223 -0.086 -0.086 8
0.196 -0.109 0.05 9
0.173 -0.127 0.15 8
0.141 -0.129 0.144 8
0.117 -0.121 0.06 9
0.103 -0.115 -0.048 8
0.093 -0.104 -0.043 9
0.073 -0.085 -0.169 8
0.048 -0.064 -0.185 7
0.024 -0.06 -0.042 10
0.004 -0.057 0.099 8
-0.006 -0.034 0.165 9
-0.01 0.004 0.119 8
-0.009 0.003 0.107 8
0.005 0.036 0.005 9
0.021 0.079 -0.046 8
0.018 0.112 -0.044 9
0.002 0.109 -0.037 8
-0.003 0.097 0.014 8
0.059 0.039 0.076 9
0.053 0.035 0.068 6
0.192 -0.071 0.114 11
0.384 -0.147 0.14 8
0.564 -0.176 0.037 8
0.651 -0.169 -0.218 9
0.606 -0.125 -0.485 8
0.546 -0.055 -0.619 8
0.491 -0.049 -0.557 9
0.341 -0.014 -0.579 8
0.326 -0.03 -0.572 9
0.365 -0.08 -0.621 8
0.434 -0.24 -0.75 8
0.391 -0.216 -0.675 7
0.461 -0.44 -0.868 10
0.486 -0.627 -1.033 9
0.461 -0.756 -1.089 8
0.39 -0.817 -1.063 8
0.261 -0.835 -0.997 9
0.14 -0.86 -0.92 8
0.053 -0.883 -0.85 9
0.048 -0.794 -0.765 8
-0.012 -0.776 -0.719 8
-0.011 -0.769 -0.745 9
0.079 -0.829 -0.917 8
0.19 -0.925 -1.136 7
0.218 -1.007 -1.367 10
0.102 -1.065 -1.593 8
0.092 -0.959 -1.434 9
-0.175 -1.009 -1.465 8
-0.467 -1.027 -1.173 8
-0.625 -1.062 -0.708 9
-0.598 -1.211 -0.295 8
-0.428 -1.371 -0.025 9
-0.385 -1.234 -0.023 8
-0.144 -1.352 -0.02 8
0.106 -1.447 -0.109 9
0.271 -1.371 -0.455 7
0.269 -1.146 -0.878 10
0.159 -0.943 -1.204 8
-0.037 -0.761 -1.313 8
-0.033 -0.685 -1.181 9
-0.312 -0.456 -1.093 8
-0.571 -0.293 -0.675 9
-0.677 -0.328 -0.105 8
-0.556 -0.431 0.18 8
-0.232 -0.503 0.055 9
0.173 -0.503 -0.37 8
0.156 -0.453 -0.333 9
0.442 -0.387 -0.909 6
0.497 -0.288 -1.369 10
0.304 -0.048 -1.467 9
-0.026 0.304 -1.206 8
-0.277 0.607 -0.812 9
-0.375 0.844 -0.434 8
-0.338 0.759 -0.391 8
-0.323 0.95 -0.044 9
-0.183 1.098 0.207 8
0.014 1.204 0.261 8
0.008 1.233 0.331 9
-0.385 1.375 0.757 8
-0.346 1.237 0.681 7
-0.986 1.524 1.435 10
-1.558 1.72 2.344 8
-1.823 1.902 3.294 9
-1.707 2.022 3.929 8
-1.199 1.998 3.978 9
-0.519 1.953 3.717 8
-0.467 1.758 3.346 8
-0.074 1.752 3.164 9
-0.196 1.835 3.113 8
-0.657 2.048 3.135 9
-1.055 2.24 3.305 8
-1.16 2.241 3.663 7
-0.899 1.991 3.887 10
-0.809 1.792 3.499 8
-0.27 1.381 3.461 9
0.214 1.069 3.255 8
0.201 1.181 2.993 8
-0.276 1.688 2.664 9
-0.757 2.259 2.119 8
-0.977 2.582 1.729 9
-0.88 2.323 1.556 8
-0.767 2.213 1.586 8
-0.283 1.61 1.823 9
0.383 0.72 2.289 6
0.979 -0.124 2.728 11
1.502 -0.693 2.897 8
1.352 -0.624 2.841 8
1.636 -0.561 2.557 9
1.539 -1.172 2.056 8
1.286 -1.052 1.125 8
1.141 -0.496 0.47 9
1.08 -0.148 -0.056 8
0.782 -0.116 -0.586 9
0.704 -0.104 -0.527 8
0.149 0.081 -0.582 8
-0.379 0.428 -0.533 7
-1.132 0.837 -0.789 10
-2.402 1.094 -0.85 9
-3.777 1.151 -0.055 8
-4.667 1.079 1.692 8
-4.201 0.971 1.523 9
-4.483 0.641 3.328 8
-4.284 -0.001 4.203 9
-3.614 -0.702 3.986 8
-2.558 -1.271 2.819 8
-1.345 -1.491 0.972 9
-0.144 -1.261 -1.22 8
-0.129 -1.135 -1.098 7
0.593 -0.809 -3.156 10
0.587 -0.81 -4.507 8
0.383 -1.184 -4.901 9
0.512 -1.677 -4.601 8
0.792 -2.098 -3.881 8
0.713 -1.888 -3.492 9
0.739 -2.373 -2.436 8
0.533 -2.974 -1.231 9
0.273 -3.535 -0.286 8
0.002 -3.803 0.077 8
-0.241 -3.526 -0.239 9
-0.216 -3.173 -0.215 7
-0.32 -2.584 -1.092 10
-0.213 -1.908 -2.152 8
0.141 -1.269 -3.022 8
0.603 -0.845 -3.293 9
0.842 -0.699 -2.748 8
0.754 -0.774 -1.684 9
0.312 -0.961 -0.548 8
0.281 -0.865 -0.493 8
-0.34 -1.044 0.276 9
-0.836 -1.005 0.492 8
-1.172 -0.554 0.243 9
-1.421 0.111 -0.318 6
-1.436 0.584 -0.967 10
-1.055 0.729 -1.528 9
-0.95 0.656 -1.375 8
-0.276 0.543 -1.726 8
0.412 0.394 -1.787 9
0.846 0.401 -1.696 8
1.041 0.506 -1.57 9
1.091 0.586 -1.431 8
0.982 0.527 -1.288 8
0.915 0.545 -1.037 9
0.629 0.465 -0.492 8
0.158 0.205 0.374 7
-0.233 -0.209 1.07 10
-0.277 -0.461 0.822 8
0.103 -0.241 -0.354 9
0.093 -0.216 -0.319 8
0.52 0.435 -1.614 9
0.683 1.286 -2.328 8
0.668 1.974 -2.194 8
0.531 2.262 -1.182 9
0.372 2.064 0.321 8
0.376 1.489 1.656 9
0.338 1.34 1.49 8
0.588 0.76 2.381 7
1.006 0.249 2.777 10
1.426 -0.158 2.801 8
1.683 -0.37 2.577 9
1.66 -0.388 2.001 8
1.381 -0.124 1.093 8
1.243 -0.111 0.984 9
0.932 0.429 -0.067 8
0.629 1.026 -0.914 8
0.305 1.384 -1.094 9
0.16 1.368 -0.616 8
0.28 1.047 0.156 9
0.252 0.942 0.14 6
0.566 0.507 0.861 10
0.954 0.189 1.158 9
1.373 0.078 0.899 8
1.768 0.184 0.232 9
2.082 0.449 -0.344 8
2.158 0.671 -0.301 8
1.942 0.604 -0.271 9
1.593 0.534 0.228 8
1.213 0.167 0.596 9
1.202 -0.252 0.531 8
1.451 -0.669 0.251 8
1.735 -1.085 0.034 7
1.899 -1.452 -0.053 10
1.709 -1.306 -0.047 9
1.704 -1.545 -0.008 8
1.5 -1.565 0.106 8
1.218 -1.377 0.136 9
0.946 -1.055 0.127 8
0.681 -0.798 0.25 9
0.613 -0.718 0.225 8
0.331 -0.607 0.435 8
0.019 -0.557 0.594 9
-0.259 -0.476 0.628 8
-0.442 -0.326 0.384 7
-0.565 -0.178 -0.196 10
-0.691 -0.031 -0.903 8
-0.621 -0.028 -0.812 9
-0.749 0.19 -1.468 8
-0.81 0.41 -1.863 8
-0.807 0.513 -1.832 9
-0.79 0.477 -1.441 8
-0.786 0.414 -0.974 9
-0.808 0.421 -0.658 8
-0.727 0.379 -0.592 8
-0.767 0.422 -0.452 9
-0.817 0.475 -0.44 6
-0.829 0.538 -0.508 11
-0.756 0.57 -0.706 8
-0.643 0.569 -0.963 8
-0.541 0.539 -1.04 9
-0.487 0.485 -0.936 8
-0.374 0.536 -1.041 9
-0.416 0.664 -1.106 8
-0.507 0.601 -0.918 8
-0.435 0.402 -0.603 9
-0.377 0.288 -0.352 8
-0.339 0.259 -0.317 8
-0.313 0.238 -0.195 7
-0.237 0.239 -0.001 10
-0.108 0.181 0.266 9
-0.013 0.06 0.461 8
0.044 0.013 0.428 8
0.094 0.073 0.061 9
0.084 0.066 0.055 8
0.088 0.104 -0.366 9
0.067 0.127 -0.443 8
-0.036 0.183 -0.22 8
-0.262 0.188 0.222 9
-0.382 0.182 0.473 8
-0.344 0.163 0.425 7
-0.143 0.151 0.33 10
0.171 0.067 0.106 8
0.394 0.001 -0.094 9
0.536 -0.041 -0.145 8
0.645 -0.136 -0.055 9
0.72 -0.264 0.062 8
0.664 -0.282 0.089 8
0.598 -0.254 0.08 9
0.37 -0.144 0.112 8
0.074 -0.013 0.173 9
-0.114 0.052 0.266 8
-0.126 0.024 0.361 7
0.006 -0.04 0.308 10
0.005 -0.036 0.277 8
0.176 -0.159 0.149 8
0.274 -0.289 0.168 9
0.238 -0.266 0.276 8
0.11 -0.126 0.286 9
-0.016 0.012 0.156 8
-0.096 0.085 0.035 8
-0.086 0.077 0.031 9
-0.131 0.095 0.07 8
-0.179 0.099 0.314 9
-0.203 0.115 0.633 6
-0.131 0.119 0.685 10
0.133 0.089 0.376 9
0.528 -0.03 -0.007 8
0.475 -0.027 -0.006 9
0.73 -0.18 -0.152 8
0.753 -0.201 -0.095 8
0.659 -0.091 -0.095 9
0.485 0.03 -0.269 8
0.284 0.116 -0.588 9
0.195 0.142 -0.849 8
0.176 0.128 -0.764 8
0.134 0.123 -0.874 7
0.061 0.155 -0.906 10
0.003 0.186 -0.891 8
-0.015 0.185 -0.877 9
0.044 0.184 -0.835 8
0.039 0.166 -0.751 9
0.162 0.159 -0.636 8
0.213 0.121 -0.468 8
0.126 0.105 -0.12 9
-0.016 0.107 0.299 8
-0.112 0.09 0.51 9
-0.138 0.077 0.509 8
-0.124 0.069 0.458 7
-0.137 0.092 0.312 10
-0.152 0.163 0.078 8
-0.193 0.282 -0.17 9
-0.289 0.433 -0.351 8
-0.392 0.565 -0.436 8
-0.511 0.66 -0.444 9
-0.46 0.594 -0.399 8
-0.593 0.66 -0.362 9
-0.654 0.673 -0.288 8
-0.631 0.63 -0.164 8
-0.564 0.529 0.043 9
-0.508 0.476 0.039 6
-0.24 0.155 0.331 11
-0.216 0.139 0.298 8
-0.047 -0.025 0.268 8
0.063 -0.093 0.143 9
0.118 -0.079 0.001 8
0.14 -0.081 0.029 8
0.163 -0.12 0.094 9
0.146 -0.108 0.084 8
0.155 -0.118 0.045 9
0.14 -0.087 0.023 8
0.126 -0.088 0.066 8
0.111 -0.092 0.031 7
0.102 -0.084 -0.106 10
0.118 -0.092 -0.198 9
0.106 -0.083 -0.178 8
0.12 -0.16 -0.133 8
0.08 -0.209 -0.001 9
-0.019 -0.108 0.054 8
-0.146 0.041 -0.045 9
-0.289 0.183 -0.18 8
-0.395 0.316 -0.256 8
-0.355 0.284 -0.231 9
-0.363 0.336 -0.276 8
-0.283 0.261 -0.193 7
-0.199 0.111 -0.071 10
-0.108 -0.075 -0.086 8
-0.046 -0.139 -0.051 9
-0.042 -0.125 0.051 8
-0.028 -0.112 0.046 8
-0.002 -0.019 0.107 9
-0.082 0.159 0.151 8
-0.26 0.423 0.097 9
-0.423 0.668 -0.131 8
-0.453 0.706 -0.436 8
-0.408 0.635 -0.392 9
-0.311 0.38 -0.431 7
-0.154 0.145 -0.113 10
-0.044 0.063 0.129 8
-0.046 0.098 0.169 8
-0.116 0.123 0.229 9
-0.193 0.026 0.322 8
# end
#Thu Feb 26 20:41:04 GMT+08:00 20153
