# Supplementary material for: Abnormal Gait Behavior Detection for Elderly Based on Enhanced Wigner-Ville Analysis and Cloud Incremental SVM Learning
Source: Hindawi journal article supplement (doi:10.1155/2016/5869238), 2016-01-01
Supplement: f1 [file 5869238.f1.zip › Supplementary Materials/Original Data/Rightward fall Ending lying/original__135.txt]

# Accelerometer Values
# filename:  original__135.txt
# Saving start time: Thu Feb 26 20:41:07 GMT+08:00 2015

# sensor resolution: 0.0095825195m/s^2
#Sensorvendor: KIONIX, name: KX023 Accelerometer, type: 1,version : 1, range 39.240005

# X value, Y value, Z value, time diff in ms
0.088 -0.018 -0.077 8
0.079 -0.016 -0.069 7
0.084 0.031 -0.498 10
0.064 0.027 -0.448 8
0.036 0.138 -0.442 9
0.018 0.142 -0.296 8
0.044 0.081 -0.069 9
0.067 0.018 0.052 8
0.048 0.033 0.016 8
0.043 0.03 0.014 9
0.021 0.07 -0.092 8
-0.011 0.103 -0.147 9
-0.047 0.13 -0.176 8
-0.039 0.11 -0.23 7
-0.001 0.052 -0.255 10
0.042 -0.017 -0.235 8
0.038 -0.015 -0.212 9
0.078 -0.07 -0.149 8
0.099 -0.126 -0.098 8
0.061 -0.123 -0.115 9
-0.021 -0.046 -0.151 8
-0.077 -0.005 -0.169 8
-0.085 -0.03 -0.174 9
-0.077 -0.027 -0.156 8
-0.072 -0.042 -0.135 9
-0.077 -0.023 -0.088 6
-0.078 -0.004 -0.07 10
-0.071 0.013 -0.102 9
-0.048 0.038 -0.183 8
-0.015 0.053 -0.253 9
-0.013 0.048 -0.228 8
0.002 0.048 -0.24 8
0.007 0.058 -0.25 9
0.012 0.078 -0.191 8
0.032 0.049 -0.073 9
0.058 -0.018 0.0 8
0.052 -0.016 0.0 8
0.043 -0.028 0.032 7
0.002 0.021 0.04 10
-0.02 0.048 0.048 9
-0.02 0.031 0.077 8
-0.018 0.022 0.102 8
-0.011 0.015 0.114 9
-0.01 0.014 0.103 8
-0.011 0.026 0.124 8
-0.005 0.06 0.173 9
0.035 0.041 0.257 8
0.069 -0.003 0.25 9
0.047 0.015 0.128 8
0.042 0.013 0.115 7
-0.003 0.067 0.009 10
-0.038 0.1 -0.048 8
-0.051 0.109 -0.084 9
-0.039 0.105 -0.106 8
-0.004 0.097 -0.096 8
0.023 0.073 -0.059 9
0.036 0.03 -0.007 8
0.032 0.027 -0.007 9
0.037 -0.004 0.04 8
0.054 -0.014 0.039 8
0.101 -0.038 0.004 9
0.137 -0.059 -0.034 6
0.131 -0.051 -0.099 11
0.118 -0.045 -0.089 8
0.104 -0.042 -0.188 8
0.11 -0.04 -0.28 9
0.106 -0.034 -0.308 8
0.107 -0.046 -0.274 9
0.16 -0.096 -0.194 8
0.227 -0.153 -0.077 8
0.204 -0.137 -0.07 9
0.23 -0.151 0.025 8
0.221 -0.114 0.062 8
0.223 -0.078 0.054 7
0.276 -0.074 0.021 10
0.356 -0.084 -0.035 9
0.394 -0.079 -0.111 8
0.354 -0.071 -0.1 8
0.346 -0.052 -0.126 9
0.337 -0.035 -0.075 8
0.355 -0.034 -0.011 9
0.38 -0.053 0.031 8
0.384 -0.07 0.065 8
0.373 -0.106 0.13 9
0.336 -0.095 0.117 8
0.328 -0.17 0.221 7
0.317 -0.235 0.254 10
0.294 -0.222 0.177 8
0.301 -0.208 0.087 9
0.399 -0.205 -0.001 8
0.359 -0.184 -0.001 9
0.533 -0.173 -0.109 8
0.695 -0.172 -0.128 8
0.798 -0.14 -0.071 9
0.763 -0.051 -0.082 8
0.605 0.054 -0.144 8
0.393 0.092 -0.233 9
0.353 0.083 -0.21 7
0.148 0.058 -0.292 10
-0.031 0.013 -0.196 8
-0.181 -0.032 0.059 8
-0.259 -0.117 0.347 9
-0.27 -0.234 0.534 8
-0.246 -0.246 0.452 9
-0.222 -0.221 0.406 8
-0.197 -0.1 0.086 8
-0.189 0.014 -0.349 9
-0.26 0.091 -0.694 8
-0.393 0.172 -0.782 9
-0.354 0.155 -0.747 6
-0.423 0.032 -0.762 10
-0.381 0.028 -0.685 9
-0.219 -0.109 -0.812 8
-0.046 -0.224 -1.017 9
0.151 -0.34 -1.188 8
0.364 -0.433 -1.282 8
0.475 -0.47 -1.289 9
0.428 -0.423 -1.16 8
0.379 -0.437 -1.03 9
0.25 -0.456 -0.776 8
0.16 -0.545 -0.516 8
0.126 -0.706 -0.373 7
0.135 -0.867 -0.401 10
0.191 -0.966 -0.522 8
0.172 -0.87 -0.469 9
0.236 -0.909 -0.602 8
0.216 -0.898 -0.752 9
0.092 -0.861 -0.912 8
-0.061 -0.814 -1.05 8
-0.255 -0.773 -1.066 9
-0.497 -0.764 -0.958 8
-0.448 -0.688 -0.862 9
-0.657 -0.77 -0.722 8
-0.801 -0.928 -0.52 7
-0.84 -1.083 -0.369 10
-0.774 -1.211 -0.302 8
-0.708 -1.337 -0.212 9
-0.697 -1.41 -0.138 8
-0.627 -1.269 -0.124 8
-0.703 -1.259 -0.079 9
-0.83 -1.105 0.007 8
-0.913 -0.891 0.093 9
-0.934 -0.787 0.166 8
-0.887 -0.823 0.315 8
-0.798 -0.74 0.283 9
-0.682 -0.881 0.387 6
-0.508 -1.019 0.328 11
-0.313 -1.068 0.22 8
-0.162 -1.028 0.114 8
-0.073 -0.916 0.037 9
-0.048 -0.702 -0.063 8
-0.043 -0.632 -0.057 8
-0.113 -0.346 -0.129 9
-0.336 -0.047 -0.042 8
-0.647 0.219 0.222 9
-1.033 0.407 0.549 8
-1.387 0.557 0.883 8
-1.248 0.501 0.794 7
-1.406 0.557 1.194 10
-1.376 0.465 1.486 9
-1.07 0.339 1.483 8
-0.55 0.249 1.122 8
-0.079 0.24 0.661 9
0.13 0.378 0.412 8
0.022 0.622 0.545 9
0.02 0.56 0.491 8
-0.35 0.802 1.08 8
-0.745 1.025 1.886 9
-0.992 1.138 2.497 8
-1.092 1.108 2.814 7
-1.014 1.074 2.958 10
-0.878 1.052 2.948 8
-0.79 0.947 2.653 9
-0.68 1.003 2.625 8
-0.578 1.146 2.603 8
-0.485 1.375 2.444 9
-0.422 1.697 2.171 8
-0.388 2.027 2.07 9
-0.349 1.824 1.863 8
-0.372 2.09 2.034 8
-0.469 2.072 2.319 9
-0.502 1.742 2.544 7
-0.385 1.259 2.636 10
-0.217 0.683 2.779 8
0.066 0.159 2.972 8
0.059 0.143 2.674 9
0.499 -0.16 2.628 8
0.927 -0.264 2.282 9
1.227 -0.113 1.818 8
1.366 0.244 1.39 8
1.356 0.618 1.102 9
1.258 0.842 0.934 8
1.132 0.757 0.841 9
0.995 0.768 0.793 6
0.765 0.646 0.972 10
0.504 0.364 1.288 9
0.375 -0.095 1.532 8
0.396 -0.564 1.474 9
0.466 -0.761 0.904 8
0.419 -0.685 0.813 8
0.475 -0.376 -0.061 9
0.43 0.248 -1.038 8
-0.033 0.899 -1.933 8
-1.162 1.401 -2.126 9
-2.489 1.522 -1.149 8
-2.24 1.37 -1.034 7
-2.857 0.989 0.342 10
-2.784 -0.143 1.373 8
-2.353 -1.553 1.996 9
-1.269 -2.486 1.631 8
0.169 -2.722 0.035 9
1.317 -2.288 -1.968 8
1.185 -2.059 -1.771 8
1.615 -1.43 -3.138 9
0.918 -0.725 -2.859 8
-0.652 -0.033 -0.984 9
-1.954 0.301 1.194 8
-2.7 -0.186 2.644 7
-2.87 -1.165 3.449 10
-2.583 -1.049 3.104 8
-1.993 -1.722 2.956 9
-1.025 -1.991 1.324 8
-0.061 -1.83 -0.84 8
0.633 -1.405 -2.814 9
1.0 -0.905 -4.198 8
0.852 -0.44 -4.609 8
0.767 -0.396 -4.148 9
0.269 -0.108 -3.551 8
-0.281 -0.075 -2.199 9
-0.722 -0.322 -0.816 6
-0.842 -0.678 0.068 10
-0.656 -0.982 0.149 9
-0.23 -1.052 -0.548 8
-0.207 -0.947 -0.493 9
0.211 -0.738 -1.59 8
0.341 -0.33 -2.615 8
0.3 0.176 -3.086 9
0.205 0.68 -2.845 8
0.01 0.984 -2.256 9
0.009 0.885 -2.03 8
-0.209 0.829 -1.318 8
-0.442 0.458 -0.51 7
-0.74 -0.121 0.086 10
-1.157 -0.665 0.291 9
-1.571 -0.821 0.166 8
-1.932 -0.599 -0.272 8
-1.739 -0.539 -0.245 9
-1.826 -0.149 -0.832 8
-1.301 0.193 -1.17 9
-0.506 0.307 -1.077 8
0.213 0.262 -0.783 8
0.854 0.283 -0.514 9
1.3 0.378 -0.168 8
1.17 0.34 -0.151 7
1.339 0.494 0.458 10
1.351 0.637 1.06 8
1.29 0.627 1.363 9
1.244 0.548 1.502 8
1.356 0.402 1.53 8
1.63 0.143 1.398 9
1.467 0.128 1.258 8
1.832 -0.232 0.916 9
2.095 -0.612 0.446 8
2.011 -0.839 0.243 8
1.562 -0.94 0.59 9
1.406 -0.846 0.531 6
0.731 -1.074 1.397 11
0.271 -1.263 1.257 8
0.019 -1.419 2.977 8
-0.284 -1.696 2.901 9
-0.472 -1.79 2.613 8
-0.437 -1.51 1.976 9
-0.254 -1.124 0.999 8
-0.229 -1.012 0.899 8
-0.101 -0.768 0.036 9
-0.075 -0.521 -0.343 8
-0.109 -0.369 -0.275 9
-0.116 -0.397 -0.026 6
-0.052 -0.452 0.02 10
0.148 -0.478 -0.157 9
0.133 -0.43 -0.141 8
0.438 -0.462 -0.292 9
0.65 -0.563 -0.337 8
0.639 -0.682 -0.226 8
0.364 -0.668 0.112 9
0.0 -0.512 0.469 8
-0.226 -0.33 0.536 8
-0.204 -0.297 0.483 9
-0.281 -0.157 0.152 8
-0.218 -0.054 -0.361 7
0.009 0.023 -0.821 10
0.319 0.114 -1.194 8
0.555 0.271 -1.48 9
0.499 0.244 -1.632 8
0.683 0.44 -1.469 9
0.852 0.605 -1.401 8
0.873 0.706 -1.122 8
0.69 0.788 -0.71 9
0.481 0.897 -0.34 8
0.381 1.005 -0.229 9
0.343 0.905 -0.206 8
0.432 0.969 -0.324 7
0.678 0.977 -0.61 10
0.888 0.954 -0.948 8
1.03 0.871 -1.108 8
1.122 0.729 -1.044 9
1.055 0.642 -0.807 8
0.949 0.578 -0.726 9
0.759 0.663 -0.415 8
0.56 0.793 -0.135 8
0.386 0.84 0.121 9
0.254 0.826 0.388 8
0.153 0.8 0.581 9
0.138 0.72 0.523 6
0.053 0.686 0.588 10
0.031 0.613 0.532 9
0.143 0.524 0.395 8
0.319 0.434 0.189 9
0.412 0.368 0.01 8
0.434 0.342 0.041 8
0.447 0.341 0.231 9
0.402 0.307 0.208 8
0.379 0.373 0.362 9
0.314 0.493 0.369 8
0.23 0.587 0.225 8
0.117 0.595 -0.017 7
-0.015 0.536 -0.276 10
-0.014 0.482 -0.248 9
-0.149 0.39 -0.386 8
-0.341 0.247 -0.283 8
-0.557 0.089 0.046 9
-0.664 -0.038 0.415 8
-0.648 -0.164 0.685 8
-0.566 -0.314 0.747 9
-0.509 -0.282 0.672 8
-0.387 -0.374 0.531 9
-0.289 -0.362 0.228 8
-0.262 -0.277 -0.239 7
-0.29 -0.151 -0.681 10
-0.435 -0.024 -0.882 8
-0.724 0.112 -0.743 9
-0.651 0.101 -0.669 8
-0.905 0.212 -0.425 8
-0.936 0.241 -0.298 9
-0.683 0.19 -0.407 8
-0.255 0.111 -0.78 9
0.169 0.108 -1.304 8
0.487 0.171 -1.713 8
0.439 0.154 -1.542 9
0.605 0.21 -1.711 6
0.695 0.293 -1.785 11
0.743 0.376 -1.772 8
0.766 0.343 -1.694 8
0.778 0.253 -1.611 9
0.701 0.228 -1.45 8
0.641 0.202 -1.366 9
0.542 0.263 -1.296 8
0.461 0.361 -1.243 8
0.386 0.474 -1.209 9
0.335 0.567 -1.117 8
0.302 0.549 -0.79 8
0.272 0.494 -0.711 7
0.269 0.418 -0.174 10
0.289 0.368 0.203 9
0.316 0.324 0.204 8
0.383 0.258 0.19 8
0.426 0.225 0.182 9
0.347 0.25 0.072 8
0.312 0.225 0.065 9
0.164 0.279 -0.033 8
0.046 0.38 -0.122 8
0.001 0.472 -0.162 9
0.055 0.456 -0.204 8
0.183 0.372 -0.236 7
0.307 0.24 -0.077 10
0.276 0.216 -0.069 8
0.288 0.025 0.362 9
0.211 -0.062 0.751 8
0.107 -0.004 0.849 8
0.018 0.071 0.698 9
0.046 0.109 0.339 8
0.041 0.098 0.305 9
0.18 0.095 -0.033 8
0.364 0.028 -0.056 8
0.426 -0.094 0.191 9
0.258 -0.072 0.477 7
0.011 0.135 0.637 10
-0.072 0.268 0.693 8
-0.065 0.241 0.624 8
0.047 0.216 0.651 9
0.16 0.221 0.615 8
0.195 0.332 0.51 9
0.219 0.357 0.396 8
0.248 0.244 0.305 8
0.331 0.113 0.243 9
0.298 0.102 0.219 8
0.381 0.008 0.173 9
0.371 -0.049 0.115 6
0.264 -0.071 0.016 10
0.089 -0.057 -0.101 9
-0.059 -0.035 -0.183 8
-0.107 -0.041 -0.248 9
-0.097 -0.037 -0.223 8
-0.074 -0.048 -0.388 8
-0.046 -0.038 -0.605 9
-0.048 -0.018 -0.711 8
-0.069 -0.017 -0.625 9
-0.077 -0.041 -0.323 8
-0.068 -0.079 0.02 8
-0.061 -0.071 0.018 7
-0.06 -0.093 0.227 10
-0.048 -0.092 0.3 8
0.029 -0.12 0.293 9
0.119 -0.162 0.245 8
0.124 -0.152 0.172 9
0.112 -0.137 0.155 8
0.064 -0.102 0.081 8
0.02 -0.087 0.029 9
-0.023 -0.087 0.011 8
-0.058 -0.101 0.018 9
-0.074 -0.132 0.029 8
-0.067 -0.119 0.026 7
-0.09 -0.13 0.006 10
-0.124 -0.082 -0.063 8
-0.166 -0.01 -0.178 9
-0.189 0.034 -0.319 8
-0.167 0.054 -0.426 8
-0.111 0.065 -0.45 9
-0.013 0.056 -0.407 8
-0.011 0.05 -0.367 9
0.058 0.027 -0.33 8
0.038 0.024 -0.274 8
-0.058 0.049 -0.129 9
-0.218 0.089 0.052 6
-0.346 0.171 0.133 10
-0.411 0.294 0.099 9
-0.37 0.264 0.089 8
-0.404 0.387 0.021 9
-0.426 0.428 -0.012 8
-0.416 0.362 0.032 8
-0.305 0.186 0.16 9
-0.11 -0.017 0.304 8
-0.099 -0.134 0.371 9
-0.089 -0.121 0.334 8
0.1 -0.15 0.332 8
0.02 -0.13 0.318 7
-0.132 -0.073 0.318 10
-0.298 0.009 0.317 9
-0.412 0.085 0.314 8
-0.371 0.077 0.282 8
-0.385 0.109 0.278 9
-0.303 0.066 0.277 8
-0.202 -0.003 0.302 9
-0.151 -0.05 0.316 8
-0.155 -0.071 0.291 8
-0.188 -0.079 0.17 9
-0.169 -0.071 0.153 8
-0.147 -0.069 0.019 7
-0.118 -0.055 0.005 10
-0.136 -0.039 0.063 8
-0.137 -0.037 0.16 9
-0.161 -0.032 0.299 8
-0.238 0.067 0.364 8
-0.214 0.06 0.328 9
-0.275 0.189 0.249 8
-0.243 0.177 0.157 9
-0.168 0.064 0.132 8
-0.113 -0.033 0.181 8
-0.093 -0.098 0.3 9
-0.084 -0.088 0.27 7
-0.09 -0.148 0.406 10
# end
#Thu Feb 26 20:41:11 GMT+08:00 2015.
