# Supplementary material for: Abnormal Gait Behavior Detection for Elderly Based on Enhanced Wigner-Ville Analysis and Cloud Incremental SVM Learning
Source: Hindawi journal article supplement (doi:10.1155/2016/5869238), 2016-01-01
Supplement: f1 [file 5869238.f1.zip › Supplementary Materials/Original Data/Rightward fall Ending lying/original__136.txt]

# Accelerometer Values
# filename:  original__136.txt
# Saving start time: Thu Feb 26 20:41:16 GMT+08:00 2015

# sensor resolution: 0.0095825195m/s^2
#Sensorvendor: KIONIX, name: KX023 Accelerometer, type: 1,version : 1, range 39.240005

# X value, Y value, Z value, time diff in ms
0.123 0.088 -0.13 9
0.111 0.105 -0.254 8
0.08 0.125 -0.379 9
0.072 0.112 -0.341 8
0.042 0.142 -0.426 8
-0.007 0.181 -0.453 7
-0.058 0.206 -0.444 10
-0.071 0.194 -0.416 9
-0.068 0.164 -0.375 8
-0.055 0.117 -0.3 8
-0.049 0.105 -0.27 9
-0.031 0.033 -0.114 8
-0.033 -0.018 0.08 9
-0.039 -0.05 0.199 8
-0.016 -0.084 0.218 8
-0.012 -0.093 0.159 9
-0.01 -0.084 0.143 8
-0.054 -0.055 0.043 7
-0.094 -0.03 -0.055 10
-0.101 -0.018 -0.128 8
-0.093 -0.007 -0.163 9
-0.062 -0.011 -0.133 8
-0.039 -0.031 -0.031 8
-0.035 -0.027 -0.028 9
-0.038 -0.034 0.082 8
-0.032 -0.034 0.136 9
-0.015 -0.038 0.149 8
0.001 -0.03 0.131 8
0.017 -0.013 0.073 9
0.015 -0.012 0.065 7
0.039 -0.003 0.003 10
0.052 -0.008 -0.008 8
0.053 -0.012 -0.004 8
0.062 -0.026 0.012 9
0.07 -0.06 0.09 8
0.071 -0.085 0.142 9
0.059 -0.074 0.095 8
0.053 -0.066 0.085 8
0.031 -0.029 -0.006 9
0.004 0.019 -0.094 8
0.008 0.062 -0.157 9
0.048 0.061 -0.129 6
0.076 0.037 -0.066 10
0.068 0.033 -0.059 9
0.068 0.033 -0.035 8
0.051 0.042 -0.037 9
0.043 0.028 -0.055 8
0.051 0.009 -0.085 8
0.062 0.021 -0.094 9
0.056 0.035 -0.027 8
0.05 0.031 -0.024 8
0.03 0.026 0.058 9
0.002 0.034 0.086 8
-0.006 0.04 0.098 7
0.023 0.018 0.12 10
0.07 -0.016 0.13 8
0.099 -0.044 0.124 9
0.089 -0.039 0.112 8
0.077 -0.067 0.102 9
0.031 -0.063 0.047 8
-0.003 -0.037 -0.065 8
-0.009 -0.033 -0.17 9
-0.005 -0.03 -0.196 8
-0.001 -0.021 -0.172 9
-0.001 -0.019 -0.155 8
0.012 -0.009 -0.117 7
0.052 -0.017 -0.071 10
0.094 -0.033 -0.063 8
0.115 -0.034 -0.109 9
0.102 -0.006 -0.164 8
0.092 0.046 -0.176 8
0.055 0.042 -0.158 9
0.012 0.082 -0.137 8
-0.014 0.094 -0.138 8
-0.012 0.098 -0.161 9
0.013 0.094 -0.171 8
0.044 0.072 -0.164 9
0.039 0.064 -0.148 6
0.059 0.033 -0.119 10
0.062 0.018 -0.03 9
0.057 -0.007 0.081 8
0.048 -0.045 0.139 9
0.045 -0.053 0.143 8
0.037 -0.059 0.139 8
0.033 -0.053 0.125 9
0.04 -0.062 0.097 8
0.077 -0.076 0.022 9
0.127 -0.101 -0.063 8
0.192 -0.113 -0.123 8
0.259 -0.111 -0.155 7
0.301 -0.093 -0.167 10
0.271 -0.084 -0.151 9
0.279 -0.073 -0.144 8
0.261 -0.077 -0.123 8
0.243 -0.06 -0.089 9
0.258 -0.04 -0.024 8
0.32 -0.033 0.045 8
0.441 -0.045 0.067 9
0.397 -0.04 0.061 8
0.521 -0.075 0.036 9
0.588 -0.122 -0.012 8
0.629 -0.215 -0.066 7
0.672 -0.335 -0.099 10
0.746 -0.423 -0.068 8
0.672 -0.381 -0.061 9
0.769 -0.426 0.039 8
0.852 -0.428 0.15 8
0.926 -0.413 0.199 9
0.971 -0.395 0.176 8
0.956 -0.36 0.088 9
0.918 -0.32 -0.003 8
0.827 -0.288 -0.003 8
0.839 -0.354 -0.039 9
0.892 -0.52 -0.085 6
0.918 -0.652 -0.219 11
0.888 -0.725 -0.472 8
0.778 -0.73 -0.742 8
0.62 -0.625 -0.904 9
0.558 -0.562 -0.814 8
0.413 -0.342 -0.862 9
0.294 -0.117 -0.829 8
0.224 -0.096 -0.792 8
0.132 -0.171 -0.843 9
-0.119 -0.125 -0.884 8
-0.527 0.008 -0.752 8
-0.475 0.007 -0.677 7
-0.89 0.067 -0.505 10
-1.049 -0.001 -0.276 9
-0.985 -0.217 0.093 8
-0.896 -0.449 0.363 8
-0.766 -0.559 0.276 9
-0.689 -0.503 0.248 8
-0.617 -0.556 0.223 9
-0.659 -0.567 -0.599 8
-0.721 -0.555 -0.847 8
-0.761 -0.583 -0.764 9
-0.73 -0.652 -0.532 8
-0.657 -0.587 -0.478 7
-0.474 -0.699 -0.268 10
-0.218 -0.877 -0.172 8
0.007 -0.997 -0.33 9
0.122 -1.029 -0.798 8
0.012 -1.016 -1.301 9
-0.252 -1.029 -1.588 8
-0.56 -1.128 -1.669 8
-0.504 -1.015 -1.502 9
-0.906 -1.097 -1.382 8
-1.22 -1.063 -0.929 8
-1.291 -1.091 -0.423 9
-1.11 -1.198 -0.224 7
-0.753 -1.233 -0.388 10
-0.396 -1.246 -0.721 8
-0.357 -1.121 -0.649 8
-0.089 -1.113 -0.938 9
-0.042 -1.021 -1.18 8
-0.145 -0.864 -1.328 9
-0.253 -0.716 -1.275 8
-0.421 -0.626 -0.98 8
-0.635 -0.564 -0.421 9
-0.572 -0.507 -0.379 8
-0.722 -0.465 0.282 9
-0.766 -0.437 0.812 6
-0.712 -0.415 1.122 10
-0.505 -0.398 1.213 9
-0.245 -0.345 1.125 8
-0.22 -0.311 1.013 9
-0.063 -0.212 0.797 8
0.019 -0.029 0.529 8
0.02 0.278 0.394 9
-0.141 0.71 0.544 8
-0.384 1.224 0.831 9
-0.71 1.715 1.082 8
-0.639 1.543 0.974 8
-1.09 1.908 1.375 7
-1.612 2.106 2.107 10
-2.05 2.332 3.103 8
-2.287 2.412 4.113 9
-2.248 2.082 4.812 8
-1.97 1.622 5.051 9
-1.773 1.46 4.545 8
-1.559 1.226 4.269 8
-1.388 1.354 3.436 9
-1.167 1.624 2.386 8
-0.999 1.775 1.624 9
-0.945 1.783 1.446 8
-0.851 1.604 1.302 7
-0.91 1.483 1.705 10
-1.054 1.273 2.431 8
-1.194 1.058 3.121 9
-1.251 0.965 3.353 8
-1.233 1.162 2.952 8
-1.172 1.541 2.314 9
-1.055 1.387 2.082 8
-1.003 1.707 1.605 9
-0.89 1.795 1.357 8
-0.62 1.447 1.299 8
-0.248 0.819 1.321 9
0.049 0.237 1.393 6
0.237 -0.197 1.464 11
0.213 -0.178 1.318 8
0.455 -0.493 1.167 8
0.725 -0.702 0.745 9
0.805 -0.697 0.208 8
0.698 -0.54 -0.481 8
0.587 -0.379 -1.158 9
0.657 -0.184 -1.644 8
0.591 -0.166 -1.48 9
0.636 0.064 -1.735 8
0.054 0.258 -1.593 8
-1.067 0.376 -0.927 7
-2.115 0.395 0.408 10
-2.694 0.396 2.235 9
-2.744 0.472 3.691 8
-2.47 0.425 3.322 8
-2.084 0.452 3.56 9
-1.368 0.41 2.59 8
-0.634 0.38 1.073 9
-0.326 0.488 -0.307 8
-0.498 0.544 -0.93 8
-0.448 0.49 -0.837 9
-0.694 -0.054 -0.611 8
-0.693 -1.159 0.09 7
-0.348 -2.457 0.873 10
0.097 -3.71 1.43 8
0.36 -4.618 1.606 9
0.382 -4.965 1.301 8
0.343 -4.469 1.171 8
0.188 -4.277 0.454 9
0.148 -3.77 -0.508 8
0.33 -3.189 -1.447 9
0.503 -2.54 -2.141 8
0.551 -1.931 -2.533 8
0.475 -1.667 -2.491 9
0.428 -1.501 -2.242 7
0.308 -1.523 -1.79 10
0.212 -1.554 -1.206 8
0.184 -1.628 -0.967 8
0.305 -1.679 -1.234 9
0.56 -1.534 -1.887 8
0.77 -1.205 -2.627 9
0.693 -1.084 -2.364 8
0.635 -0.638 -2.939 8
0.414 -0.073 -3.191 9
0.191 0.557 -3.14 8
-0.125 1.216 -2.898 9
-0.112 1.094 -2.608 6
-0.586 1.996 -1.789 10
-0.527 1.797 -1.61 9
-0.536 1.673 -1.161 8
-0.338 1.278 -0.81 9
0.094 0.823 -0.483 8
0.746 0.396 -0.281 8
1.514 -0.029 -0.412 9
1.362 -0.026 -0.371 8
1.705 -0.34 -0.78 8
1.18 -0.254 -0.724 9
0.178 0.066 -0.018 8
-0.712 0.152 0.58 7
-1.108 0.059 0.737 10
-0.811 -0.101 0.312 8
-0.73 -0.091 0.281 9
0.089 -0.296 -0.744 8
0.944 -0.415 -1.839 9
1.517 -0.383 -2.49 8
1.738 -0.201 -2.499 8
1.633 0.06 -1.816 9
1.404 0.285 -0.768 8
1.263 0.257 -0.691 9
1.073 0.42 0.288 8
0.899 0.618 1.084 7
0.693 0.897 1.643 10
0.537 1.121 1.887 8
0.531 1.205 1.871 9
0.686 1.189 1.589 8
0.617 1.07 1.43 8
0.936 1.026 0.964 9
1.25 0.95 0.514 8
1.288 0.855 0.245 9
1.028 0.879 0.241 8
0.702 0.983 0.266 8
0.632 0.885 0.24 9
0.415 0.93 -0.031 6
0.267 1.026 -0.516 10
0.178 1.258 -0.938 9
0.252 1.453 -1.225 8
0.484 1.447 -1.374 9
0.766 1.242 -1.225 8
0.69 1.117 -1.102 8
0.996 0.842 -0.691 9
1.32 0.497 -0.238 8
1.682 0.098 0.129 9
1.952 -0.188 0.34 8
1.955 -0.248 0.38 8
1.759 -0.223 0.342 7
1.487 -0.005 0.338 10
1.082 0.294 0.459 9
0.762 0.453 0.752 8
0.644 0.464 1.088 8
0.81 0.306 1.224 9
1.149 0.11 1.038 8
1.394 -0.007 0.679 9
1.254 -0.006 0.611 8
1.296 0.011 0.259 8
1.132 0.164 0.003 9
0.843 0.295 0.003 8
0.515 0.334 0.262 7
0.18 0.276 0.585 10
0.162 0.248 0.526 8
-0.066 0.106 0.782 9
-0.123 -0.127 0.9 8
-0.081 -0.384 0.857 8
-0.08 -0.526 0.7 9
-0.21 -0.494 0.584 8
-0.443 -0.404 0.594 9
-0.399 -0.364 0.535 8
-0.685 -0.365 0.6 8
-0.865 -0.403 0.615 9
-0.835 -0.418 0.563 6
-0.74 -0.417 0.477 11
-0.694 -0.395 0.257 8
-0.667 -0.358 -0.121 8
-0.601 -0.322 -0.109 9
-0.632 -0.285 -0.415 8
-0.69 -0.244 -0.548 9
-0.722 -0.21 -0.682 8
-0.822 -0.177 -0.737 8
-0.958 -0.129 -0.602 9
-1.005 -0.059 -0.539 8
-0.904 -0.053 -0.485 9
-0.831 0.044 -0.676 6
-0.64 0.161 -0.997 10
-0.406 0.262 -1.351 9
-0.227 0.306 -1.646 8
-0.124 0.301 -1.739 8
-0.111 0.271 -1.565 9
-0.075 0.265 -1.399 8
-0.306 0.289 -0.586 9
-0.604 0.353 0.065 8
-0.505 0.467 -0.09 8
-0.206 0.526 -0.495 9
0.08 0.44 -0.933 8
0.072 0.396 -0.839 7
0.334 0.262 -1.233 10
0.502 0.25 -1.491 8
0.594 0.345 -1.55 9
0.616 0.393 -1.523 8
0.607 0.389 -1.354 9
0.595 0.363 -1.062 8
0.535 0.327 -0.955 8
0.479 0.307 -0.63 9
0.393 0.276 -0.386 8
0.369 0.232 -0.249 9
0.374 0.221 -0.185 8
0.336 0.24 -0.208 7
0.424 0.253 -0.254 10
0.382 0.228 -0.229 8
0.456 0.214 -0.202 9
0.558 0.163 -0.132 8
0.634 0.12 -0.038 8
0.629 0.098 0.174 9
0.519 0.089 0.446 8
0.467 0.08 0.677 8
0.312 0.081 0.609 9
0.192 0.093 0.767 8
0.155 0.102 0.786 9
0.189 0.101 0.663 6
0.278 0.121 0.337 10
0.411 0.197 -0.076 9
0.37 0.177 -0.068 8
0.574 0.163 -0.364 9
0.745 0.045 -0.475 8
0.752 -0.008 -0.399 8
0.647 -0.017 -0.162 9
0.562 -0.022 0.118 8
0.551 -0.055 0.391 9
0.495 -0.049 0.352 8
0.489 -0.089 0.767 8
0.382 -0.054 1.149 7
0.223 0.109 1.095 10
0.182 0.25 0.65 9
0.253 0.236 0.17 8
0.321 0.145 -0.131 8
0.289 0.131 -0.118 9
0.305 0.049 -0.261 8
0.289 -0.005 -0.366 8
0.285 -0.049 -0.453 9
0.288 -0.095 -0.509 8
0.26 -0.108 -0.543 9
0.187 -0.064 -0.557 8
0.168 -0.058 -0.501 7
0.014 0.043 -0.558 10
-0.186 0.228 -0.709 8
-0.376 0.454 -0.846 9
-0.509 0.598 -0.816 8
-0.554 0.6 -0.59 8
-0.498 0.54 -0.531 9
-0.515 0.483 -0.204 8
-0.499 0.404 0.169 9
-0.437 0.287 0.435 8
-0.339 0.187 0.478 8
-0.207 0.136 0.329 9
-0.186 0.123 0.296 6
-0.056 0.084 0.081 11
0.042 0.037 -0.035 8
0.081 -0.004 0.017 8
0.052 -0.014 0.189 9
-0.017 -0.007 0.351 8
-0.031 -0.087 0.477 9
0.052 -0.239 0.565 8
0.047 -0.215 0.509 8
0.145 -0.314 0.547 9
0.212 -0.342 0.525 8
0.24 -0.327 0.417 8
0.244 -0.28 0.249 7
0.199 -0.193 0.076 10
0.108 -0.075 -0.029 9
0.097 -0.068 -0.026 8
0.017 0.037 -0.061 8
-0.033 0.045 -0.033 9
-0.065 0.004 0.055 8
-0.075 -0.014 0.115 9
-0.058 -0.043 0.1 8
-0.052 -0.038 0.09 8
-0.039 -0.04 0.081 9
-0.049 -0.035 -0.094 8
-0.06 -0.047 -0.141 7
-0.069 -0.045 -0.115 10
-0.086 -0.034 -0.096 8
-0.095 -0.058 -0.112 9
-0.085 -0.052 -0.101 8
-0.085 -0.084 -0.125 9
-0.087 -0.06 -0.153 8
-0.108 0.002 -0.182 8
-0.117 0.088 -0.233 9
-0.155 0.093 -0.192 8
-0.251 0.079 -0.046 9
-0.225 0.071 -0.042 8
-0.339 0.168 0.082 7
-0.408 0.233 0.171 10
-0.361 0.135 0.233 8
-0.23 -0.02 0.206 8
-0.038 -0.125 0.0 9
0.15 -0.159 -0.128 8
0.135 -0.143 -0.116 9
0.27 -0.168 0.011 8
0.374 -0.203 0.203 8
0.324 -0.188 0.286 9
0.157 -0.163 0.343 8
-0.003 -0.149 0.43 9
-0.003 -0.134 0.387 6
-0.162 -0.06 0.398 10
-0.266 0.112 0.265 9
-0.289 0.195 0.144 8
-0.253 0.109 0.106 9
-0.19 0.052 -0.005 8
# end
#Thu Feb 26 20:41:19 GMT+08:00 2015.
