# Supplementary material for: Abnormal Gait Behavior Detection for Elderly Based on Enhanced Wigner-Ville Analysis and Cloud Incremental SVM Learning
Source: Hindawi journal article supplement (doi:10.1155/2016/5869238), 2016-01-01
Supplement: f1 [file 5869238.f1.zip › Supplementary Materials/Original Data/Rightward fall Ending lying/original__137.txt]

# Accelerometer Values
# filename:  original__137.txt
# Saving start time: Thu Feb 26 20:41:23 GMT+08:00 2015

# sensor resolution: 0.0095825195m/s^2
#Sensorvendor: KIONIX, name: KX023 Accelerometer, type: 1,version : 1, range 39.240005

# X value, Y value, Z value, time diff in ms
0.098 -0.182 0.362 9
0.153 -0.178 0.137 8
0.185 -0.146 -0.152 9
0.147 -0.039 -0.424 8
0.072 0.09 -0.566 8
0.065 0.081 -0.509 9
-0.017 0.192 -0.55 6
-0.101 0.281 -0.522 10
-0.125 0.329 -0.454 9
-0.068 0.262 -0.299 8
0.021 0.105 -0.099 9
0.097 0.022 -0.008 8
0.087 0.019 -0.007 8
0.1 0.031 -0.031 9
0.07 0.017 -0.045 8
0.023 -0.007 -0.002 9
-0.046 0.029 0.054 8
-0.093 0.082 0.063 8
-0.084 0.074 0.057 7
-0.081 0.077 -0.004 10
-0.05 0.053 -0.101 9
-0.009 0.036 -0.208 8
0.069 -0.03 -0.285 8
0.155 -0.103 -0.313 9
0.152 -0.086 -0.31 8
0.137 -0.077 -0.279 9
0.053 -0.012 -0.253 8
-0.04 0.051 -0.165 8
-0.119 0.114 0.003 9
-0.169 0.157 0.171 8
-0.147 0.137 0.253 7
-0.067 0.048 0.282 10
-0.061 0.043 0.254 8
0.006 -0.032 0.252 9
0.032 -0.034 0.183 8
0.043 -0.027 0.048 8
0.071 -0.05 -0.096 9
0.105 -0.056 -0.18 8
0.115 -0.044 -0.19 9
0.103 -0.039 -0.171 8
0.095 -0.033 -0.16 8
0.071 -0.013 -0.159 9
0.034 0.022 -0.17 7
-0.003 0.064 -0.163 10
-0.04 0.107 -0.132 8
-0.036 0.096 -0.09 8
-0.045 0.087 -0.081 9
-0.012 0.067 -0.027 8
0.021 0.04 0.016 9
0.02 0.055 0.017 8
0.009 0.105 -0.009 8
0.016 0.124 -0.018 9
0.014 0.112 -0.016 8
0.037 0.093 -0.004 9
0.09 0.051 -0.001 6
0.152 0.001 -0.032 10
0.162 -0.018 -0.081 9
0.114 -0.013 -0.126 8
0.056 0.0 -0.158 8
0.05 0.0 -0.142 9
0.014 0.015 -0.154 8
0.011 0.005 -0.139 9
0.064 -0.036 -0.112 8
0.142 -0.065 -0.083 8
0.205 -0.06 -0.062 9
0.242 -0.06 -0.071 8
0.217 -0.054 -0.064 7
0.22 -0.047 -0.09 10
0.183 0.004 -0.128 8
0.12 0.081 -0.186 9
0.084 0.137 -0.221 8
0.093 0.16 -0.203 9
0.116 0.16 -0.144 8
0.104 0.144 -0.129 8
0.112 0.128 -0.063 9
0.138 0.099 -0.024 8
0.223 0.051 0.004 9
0.326 -0.004 0.024 8
0.294 -0.004 0.021 7
0.471 -0.002 0.026 10
0.424 -0.002 0.023 8
0.48 0.022 0.007 8
0.562 0.062 -0.017 9
0.727 0.064 -0.039 8
0.923 0.038 -0.075 9
1.054 0.006 -0.115 8
0.948 0.006 -0.103 8
1.0 -0.048 -0.104 9
0.973 -0.101 -0.065 8
0.905 -0.143 -0.02 9
0.846 -0.295 0.013 6
0.784 -0.473 0.016 10
0.69 -0.477 -0.037 9
0.621 -0.429 -0.033 8
0.526 -0.322 -0.13 9
0.44 -0.199 -0.243 8
0.28 -0.025 -0.507 8
0.064 0.194 -0.78 9
-0.048 0.269 -0.964 8
-0.053 0.185 -1.16 9
-0.048 0.166 -1.044 8
-0.029 0.045 -1.155 8
0.004 -0.102 -1.193 7
0.011 -0.34 -1.1 10
-0.061 -0.548 -0.752 9
-0.159 -0.654 -0.377 8
-0.192 -0.766 -0.198 8
-0.173 -0.689 -0.178 9
-0.102 -0.826 -0.137 8
0.029 -0.94 -0.195 8
0.147 -1.045 -0.324 9
0.221 -1.108 -0.512 8
0.186 -1.1 -0.652 9
0.167 -0.99 -0.587 8
-0.067 -0.935 -0.528 7
-0.366 -0.84 -0.111 10
-0.55 -0.767 0.131 8
-0.62 -0.726 0.24 9
-0.604 -0.726 0.258 8
-0.529 -0.811 0.224 8
-0.476 -0.73 0.201 9
-0.401 -0.91 0.152 8
-0.345 -1.085 0.115 9
-0.31 -1.223 0.075 8
-0.291 -1.386 -0.083 8
-0.33 -1.5 -0.318 9
-0.297 -1.35 -0.286 6
-0.436 -1.372 -0.478 11
-0.566 -1.358 -0.718 8
-0.607 -1.358 -0.849 8
-0.609 -1.354 -0.738 9
-0.591 -1.363 -0.59 8
-0.536 -1.399 -0.496 9
-0.442 -1.404 -0.432 8
-0.397 -1.263 -0.388 8
-0.3 -1.296 -0.432 9
-0.128 -1.291 -0.729 8
0.02 -1.145 -1.103 8
-0.016 -0.872 -1.277 7
-0.103 -0.556 -1.311 10
-0.154 -0.286 -1.354 9
-0.139 -0.257 -1.219 8
-0.187 0.055 -1.335 8
-0.282 0.368 -1.456 9
-0.453 0.586 -1.379 8
-0.679 0.701 -1.002 9
-0.977 0.705 -0.4 8
-0.879 0.635 -0.36 8
-1.132 0.555 0.397 9
-1.186 0.462 1.077 8
-1.118 0.454 1.45 7
-1.064 0.589 1.658 10
-1.279 0.81 1.824 8
-1.938 1.107 2.017 9
-1.744 0.996 1.815 8
-2.58 1.426 2.17 8
-3.137 1.883 2.467 9
-3.17 2.134 2.487 8
-2.699 2.023 2.36 9
-2.047 1.748 2.329 8
-1.522 1.629 2.577 8
-1.37 1.466 2.319 9
-1.092 1.588 2.792 7
-1.034 1.762 3.246 10
-1.169 1.908 3.526 8
-1.329 2.111 3.532 8
-1.375 2.343 3.223 9
-1.212 2.544 2.637 8
-1.091 2.289 2.373 9
-0.711 2.379 1.831 8
-0.137 2.229 1.484 8
0.54 1.915 1.204 9
1.25 1.533 1.034 8
1.898 1.199 1.146 9
1.708 1.079 1.031 6
2.011 0.796 1.414 10
1.878 0.544 1.905 9
1.288 0.441 2.283 8
0.318 0.669 2.567 9
-0.504 1.042 2.652 8
-0.681 1.129 2.32 8
-0.613 1.016 2.088 9
-0.079 0.833 1.455 8
0.788 0.622 0.681 8
1.429 0.606 -0.046 9
1.588 0.765 -0.528 8
1.332 0.892 -0.814 7
0.713 0.984 -1.031 10
0.642 0.885 -0.928 8
-0.565 0.997 -0.889 9
-2.42 0.851 -0.334 8
-4.23 0.248 1.001 9
-5.177 -0.608 2.768 8
-4.992 -1.496 4.077 8
-3.839 -2.162 4.205 9
-3.455 -1.946 3.784 8
-1.968 -2.093 2.407 9
-0.73 -1.621 0.059 8
-0.073 -0.853 -2.204 7
0.052 -0.165 -3.593 10
-0.06 0.025 -3.639 8
-0.252 -0.528 -2.534 9
-0.227 -0.475 -2.281 8
-0.414 -1.465 -0.728 8
-0.552 -2.543 0.66 9
-0.582 -3.422 1.368 8
-0.411 -3.938 1.148 9
-0.07 -3.972 0.102 8
0.31 -3.544 -1.453 8
0.279 -3.189 -1.308 9
0.546 -2.574 -2.938 6
0.573 -1.818 -4.113 10
0.421 -1.019 -4.534 9
0.205 -0.404 -4.151 8
-0.091 -0.072 -3.152 9
-0.081 -0.065 -2.837 8
-0.314 0.034 -1.828 8
-0.276 -0.004 -1.17 9
-0.155 -0.047 -0.807 8
-0.252 0.025 -0.733 9
-0.441 0.344 -1.049 8
-0.509 0.793 -1.561 8
-0.458 0.714 -1.405 7
-0.401 1.085 -1.73 10
-0.191 1.175 -1.582 9
0.059 0.878 -0.978 8
0.193 0.37 -0.06 8
0.207 -0.141 0.971 9
0.149 -0.587 1.697 8
0.134 -0.528 1.527 9
-0.069 -0.855 1.823 8
-0.523 -0.947 1.835 8
-1.089 -0.712 1.485 9
-1.432 -0.301 0.731 8
-1.221 0.054 -0.027 7
-0.524 0.169 -0.355 10
-0.471 0.152 -0.319 8
0.342 0.021 -0.13 9
0.901 -0.14 0.455 8
1.03 -0.176 1.096 8
0.891 -0.14 1.308 9
0.644 -0.119 1.046 8
0.579 0.01 0.663 9
0.246 0.009 0.596 8
0.05 0.301 0.237 8
0.255 0.562 -0.167 9
0.864 0.546 -0.532 7
1.706 0.32 -0.753 10
2.5 0.09 -0.851 8
2.25 0.081 -0.766 8
2.643 0.022 -0.709 9
2.571 0.186 -0.436 8
2.299 0.393 -0.064 9
1.892 0.566 0.396 8
1.583 0.699 0.851 8
1.645 0.749 0.942 9
1.481 0.674 0.848 8
1.846 0.694 0.528 9
2.245 0.7 -0.02 6
2.452 0.646 -0.577 10
2.295 0.556 -0.94 9
1.807 0.556 -0.947 8
1.198 0.521 -0.723 9
1.078 0.468 -0.651 8
0.644 0.321 -0.358 8
0.591 0.128 0.05 9
0.792 -0.19 0.37 8
1.013 -0.483 0.45 8
1.138 -0.568 0.265 9
1.157 -0.54 -0.062 8
1.041 -0.486 -0.056 7
0.958 -0.418 -0.257 10
0.764 -0.352 -0.131 8
0.563 -0.327 0.365 9
0.465 -0.265 0.879 8
0.54 -0.147 1.138 9
0.486 -0.132 1.024 8
0.725 -0.028 1.077 8
0.936 -0.011 0.824 9
0.971 -0.038 0.312 8
0.798 0.01 -0.093 9
0.535 0.036 -0.313 8
0.481 0.032 -0.282 7
0.302 -0.066 -0.46 10
0.113 -0.168 -0.371 8
-0.114 -0.253 0.109 9
-0.242 -0.376 0.597 8
-0.208 -0.554 0.878 8
-0.067 -0.766 0.992 9
0.043 -0.924 0.962 8
0.039 -0.831 0.866 8
-0.011 -0.876 0.697 9
-0.278 -0.71 0.353 8
-0.673 -0.408 -0.035 9
-0.97 -0.165 -0.483 6
-1.037 0.035 -1.01 10
-0.96 0.252 -1.431 9
-0.864 0.227 -1.288 8
-0.737 0.426 -1.521 9
-0.551 0.57 -1.598 8
-0.393 0.669 -1.626 8
-0.323 0.731 -1.609 9
-0.293 0.736 -1.524 8
-0.263 0.662 -1.371 9
-0.312 0.632 -1.208 8
-0.447 0.597 -0.848 8
-0.604 0.553 -0.463 7
-0.776 0.525 -0.273 10
-0.877 0.575 -0.283 9
-0.812 0.676 -0.533 8
-0.731 0.608 -0.48 8
-0.526 0.709 -0.861 9
-0.284 0.764 -1.229 8
-0.116 0.752 -1.452 9
-0.061 0.701 -1.201 8
-0.024 0.65 -0.839 8
0.151 0.653 -0.934 9
0.136 0.587 -0.841 8
0.347 0.651 -1.079 7
0.416 0.703 -1.136 10
0.294 0.72 -1.005 8
0.11 0.719 -0.699 9
0.124 0.652 -0.378 8
0.307 0.509 -0.236 8
0.276 0.458 -0.213 9
0.489 0.32 -0.259 8
0.689 0.229 -0.393 9
0.871 0.171 -0.531 8
0.985 0.169 -0.619 8
0.903 0.225 -0.627 9
0.813 0.203 -0.564 7
0.621 0.27 -0.53 10
0.469 0.27 -0.432 8
0.421 0.147 -0.202 8
0.507 -0.031 0.103 9
0.647 -0.169 0.342 8
0.774 -0.252 0.432 9
0.696 -0.227 0.389 8
0.74 -0.255 0.415 8
0.566 -0.216 0.473 9
0.254 -0.154 0.727 8
0.006 -0.13 1.061 8
-0.114 -0.135 1.229 7
-0.176 -0.108 1.252 10
-0.158 -0.098 1.127 9
-0.171 -0.066 1.057 8
-0.138 -0.041 0.79 8
-0.112 -0.015 0.378 9
-0.042 -0.07 0.179 8
0.035 -0.215 0.251 9
0.109 -0.345 0.327 8
0.098 -0.311 0.294 8
0.201 -0.34 0.273 9
0.199 -0.201 0.101 8
0.122 -0.005 -0.098 7
0.043 0.109 -0.127 10
-0.01 0.184 -0.052 8
-0.009 0.165 -0.046 9
-0.013 0.202 -0.027 8
0.001 0.238 -0.12 9
0.034 0.28 -0.222 8
0.112 0.222 -0.246 8
0.224 0.028 -0.24 9
0.247 -0.074 -0.257 8
0.222 -0.066 -0.231 8
0.121 0.001 -0.271 9
0.07 0.039 -0.367 7
0.115 0.027 -0.51 10
0.108 0.052 -0.628 8
0.0 0.156 -0.637 8
-0.175 0.284 -0.489 9
-0.157 0.256 -0.44 8
-0.357 0.355 -0.176 9
-0.525 0.395 0.106 8
-0.559 0.386 0.319 8
-0.437 0.345 0.315 9
-0.221 0.25 0.133 8
0.047 0.094 -0.023 9
0.043 0.084 -0.02 6
0.268 -0.056 -0.1 10
0.357 -0.134 -0.18 9
0.324 -0.175 -0.209 8
0.203 -0.194 -0.102 9
0.031 -0.171 0.102 8
0.027 -0.111 0.346 8
0.025 -0.1 0.312 9
-0.215 -0.003 0.466 8
-0.263 0.112 0.461 9
-0.235 0.157 0.289 8
-0.132 0.139 0.066 8
-0.118 0.125 0.059 7
0.037 0.089 -0.106 10
0.182 0.044 -0.234 9
0.265 -0.018 -0.25 8
0.238 -0.121 -0.147 8
0.124 -0.165 0.107 9
-0.016 -0.163 0.457 8
-0.135 -0.125 0.638 8
-0.121 -0.113 0.574 9
-0.203 -0.006 0.496 8
-0.274 0.129 0.219 9
-0.345 0.246 -0.057 8
-0.38 0.301 -0.234 7
-0.309 0.261 -0.362 10
-0.167 0.141 -0.384 8
-0.15 0.127 -0.346 9
-0.046 -0.004 -0.267 8
-0.018 -0.081 -0.192 8
-0.036 -0.1 -0.137 9
-0.091 -0.084 -0.044 8
-0.23 -0.027 0.109 9
-0.37 0.042 0.194 8
-0.333 0.038 0.174 8
-0.376 0.105 0.081 9
-0.343 0.161 -0.138 6
-0.289 0.197 -0.345 11
-0.194 0.19 -0.445 8
-0.086 0.127 -0.439 8
-0.078 0.114 -0.395 9
-0.015 0.053 -0.356 8
0.016 -0.004 -0.12 8
0.052 -0.032 0.032 9
0.138 -0.017 0.142 8
0.203 0.055 0.031 9
0.204 0.166 -0.161 8
0.184 0.149 -0.145 8
0.18 0.191 -0.276 7
0.147 0.181 -0.238 10
0.027 0.177 -0.099 9
# end
#Thu Feb 26 20:41:26 GMT+08:00 2015 
