# Supplementary material for: Abnormal Gait Behavior Detection for Elderly Based on Enhanced Wigner-Ville Analysis and Cloud Incremental SVM Learning
Source: Hindawi journal article supplement (doi:10.1155/2016/5869238), 2016-01-01
Supplement: f1 [file 5869238.f1.zip › Supplementary Materials/Original Data/Rightward fall Ending lying/original__138.txt]

# Accelerometer Values
# filename:  original__138.txt
# Saving start time: Thu Feb 26 20:41:30 GMT+08:00 2015

# sensor resolution: 0.0095825195m/s^2
#Sensorvendor: KIONIX, name: KX023 Accelerometer, type: 1,version : 1, range 39.240005

# X value, Y value, Z value, time diff in ms
0.013 -0.134 0.218 7
0.111 -0.262 0.198 10
0.178 -0.295 0.145 8
0.208 -0.256 0.044 9
0.178 -0.138 -0.104 8
0.099 0.037 -0.298 8
0.002 0.197 -0.467 9
0.002 0.177 -0.421 8
-0.06 0.276 -0.523 8
-0.058 0.303 -0.536 9
-0.046 0.281 -0.389 8
-0.059 0.252 -0.148 9
-0.053 0.227 -0.134 6
-0.079 0.222 0.085 10
-0.071 0.2 0.076 9
-0.14 0.193 -0.004 8
-0.15 0.205 -0.167 9
-0.12 0.191 -0.226 8
-0.067 0.143 -0.195 8
-0.033 0.119 -0.207 9
-0.03 0.107 -0.187 8
-0.026 0.109 -0.203 9
-0.022 0.104 -0.16 8
-0.01 0.077 -0.084 8
-0.025 0.042 -0.002 7
-0.049 0.029 0.078 10
-0.027 -0.007 0.167 9
-0.024 -0.007 0.15 8
0.024 -0.086 0.218 8
0.059 -0.136 0.222 9
0.079 -0.146 0.168 8
0.081 -0.143 0.047 9
0.075 -0.138 -0.081 8
0.069 -0.121 -0.148 8
0.062 -0.108 -0.133 9
0.066 -0.077 -0.193 8
0.088 -0.065 -0.205 7
0.086 -0.062 -0.044 10
0.069 -0.036 0.113 8
0.054 -0.007 0.13 9
0.048 -0.006 0.117 8
0.048 -0.005 0.1 8
0.084 -0.047 0.027 9
0.126 -0.079 -0.127 8
0.142 -0.055 -0.285 9
0.127 -0.01 -0.324 8
0.102 0.005 -0.22 8
0.092 0.004 -0.198 9
0.072 0.017 -0.069 6
0.064 0.032 0.065 11
0.058 -0.008 0.232 8
0.056 -0.059 0.321 8
0.075 -0.061 0.282 9
0.116 -0.067 0.189 8
0.104 -0.06 0.17 9
0.12 -0.068 0.083 8
0.075 -0.031 -0.002 8
0.01 0.053 -0.117 9
-0.033 0.126 -0.234 8
-0.045 0.146 -0.309 8
-0.041 0.131 -0.278 7
-0.033 0.115 -0.313 10
-0.028 0.1 -0.26 9
-0.022 0.087 -0.095 8
0.0 0.04 0.066 8
0.027 -0.017 0.136 9
0.032 -0.055 0.135 8
0.028 -0.049 0.078 9
0.012 -0.056 0.07 8
0.001 -0.048 0.026 8
0.009 -0.05 0.099 9
0.008 -0.041 0.236 8
-0.007 -0.014 0.283 7
-0.023 0.011 0.226 10
-0.021 0.01 0.203 8
-0.024 0.023 0.094 9
-0.017 0.022 -0.073 8
-0.019 0.028 -0.251 9
-0.004 0.028 -0.31 8
0.06 -0.014 -0.192 8
0.14 -0.071 0.023 9
0.126 -0.064 0.02 8
0.148 -0.058 0.138 8
0.142 -0.001 0.128 9
0.122 0.036 0.147 7
0.066 0.086 0.156 10
0.04 0.151 0.079 8
0.086 0.163 -0.039 8
0.078 0.146 -0.035 9
0.134 0.132 -0.163 8
0.153 0.132 -0.295 9
0.169 0.119 -0.362 8
0.176 0.083 -0.276 8
0.161 0.059 -0.092 9
0.145 0.053 -0.083 8
0.176 0.042 0.059 9
0.313 0.035 0.137 6
0.489 -0.007 0.202 10
0.638 -0.147 0.253 9
0.742 -0.307 0.253 8
0.804 -0.384 0.186 9
0.723 -0.345 0.167 8
0.79 -0.401 -0.016 8
0.828 -0.461 -0.249 9
0.823 -0.494 -0.382 8
0.822 -0.49 -0.424 9
0.865 -0.488 -0.427 8
0.91 -0.523 -0.436 8
0.819 -0.471 -0.393 7
0.845 -0.534 -0.42 10
0.862 -0.629 -0.442 9
0.861 -0.743 -0.457 8
0.801 -0.83 -0.484 8
0.681 -0.869 -0.502 9
0.529 -0.857 -0.501 8
0.476 -0.771 -0.451 8
0.322 -0.753 -0.444 9
0.262 -0.772 -0.443 8
0.296 -0.829 -0.493 9
0.295 -0.8 -0.622 8
0.266 -0.72 -0.56 7
0.186 -0.601 -0.755 10
0.009 -0.49 -0.679 8
-0.301 -0.396 -0.935 9
-0.672 -0.274 -0.86 8
-1.005 -0.185 -0.698 8
-1.228 -0.192 -0.545 9
-1.237 -0.229 -0.494 8
-1.113 -0.206 -0.444 9
-0.983 -0.252 -0.502 8
-0.831 -0.298 -0.656 8
-0.68 -0.313 -0.821 9
-0.581 -0.337 -0.898 6
-0.535 -0.336 -0.89 11
-0.472 -0.29 -0.84 8
-0.425 -0.261 -0.756 8
-0.349 -0.223 -0.812 9
-0.274 -0.198 -0.974 8
-0.279 -0.185 -1.112 8
-0.401 -0.173 -1.156 9
-0.585 -0.147 -1.024 8
-0.704 -0.185 -0.737 9
-0.634 -0.167 -0.663 8
-0.66 -0.359 -0.469 8
-0.684 -0.565 -0.34 7
-0.751 -0.662 -0.161 10
-0.835 -0.696 -0.011 9
-0.842 -0.743 0.056 8
-0.757 -0.668 0.062 8
-0.672 -0.601 0.056 9
-0.567 -0.969 0.019 8
-0.547 -1.067 -0.05 9
-0.644 -1.06 -0.082 8
-0.75 -0.96 -0.059 8
-0.783 -0.929 -0.014 9
-0.704 -0.836 -0.013 8
-0.635 -0.892 0.039 7
-0.404 -0.912 0.085 10
-0.046 -0.873 0.108 8
0.286 -0.797 0.131 9
0.442 -0.592 0.249 8
0.379 -0.185 0.471 8
0.341 -0.167 0.424 9
0.005 0.25 0.649 8
-0.546 0.571 1.039 9
-1.055 0.728 1.609 8
-1.326 0.663 2.026 8
-1.215 0.515 2.184 9
-1.094 0.464 1.966 7
-0.645 0.345 1.873 10
-0.133 0.338 1.45 8
0.131 0.538 0.896 8
0.055 0.783 0.457 9
-0.325 0.919 0.335 8
-0.753 0.961 0.695 9
-0.678 0.88 1.347 8
-0.61 0.792 1.212 8
-1.068 0.585 1.904 9
-0.978 0.244 2.525 8
-0.877 -0.06 3.132 9
-0.886 -0.072 3.657 6
-0.988 0.167 3.855 10
-0.889 0.15 3.469 9
-0.955 0.485 3.339 8
-0.788 0.815 2.897 9
-0.435 1.07 2.369 8
-0.152 1.224 1.999 8
-0.087 1.348 1.978 9
-0.204 1.459 2.404 8
-0.183 1.313 2.163 8
-0.513 1.337 2.876 9
-0.923 1.32 3.518 8
-1.096 1.307 3.931 7
-0.901 1.148 4.04 10
-0.425 0.849 3.746 8
-0.013 0.672 3.085 9
-0.011 0.604 2.776 8
0.167 0.712 1.955 9
0.184 0.994 1.218 8
0.166 1.203 0.615 8
0.319 1.184 0.078 9
0.848 0.932 -0.298 8
0.763 0.839 -0.268 9
1.453 0.369 -0.433 8
2.018 -0.121 -0.329 7
2.091 -0.264 0.007 10
1.074 0.142 0.313 8
-0.998 0.783 0.616 9
-3.174 1.143 1.252 8
-2.857 1.029 1.127 8
-3.89 0.802 1.859 9
-3.749 -0.161 2.422 8
-2.727 -1.068 2.407 9
-1.158 -1.325 1.098 8
0.261 -1.059 -0.915 8
1.237 -0.562 -2.542 9
1.113 -0.506 -2.288 6
1.487 -0.283 -3.087 10
1.301 -0.581 -2.976 9
0.814 -1.229 -2.2 8
0.26 -1.973 -1.215 9
-0.403 -2.643 -0.287 8
-1.158 -3.028 0.434 8
-1.042 -2.725 0.39 9
-1.725 -2.778 0.545 8
-2.042 -2.482 -0.242 9
-1.851 -1.917 -1.713 8
-1.344 -1.248 -3.341 8
-1.21 -1.123 -3.007 7
-0.568 -0.552 -4.455 10
0.222 -0.219 -4.009 9
0.981 -0.146 -5.902 8
1.339 -0.287 -5.216 8
1.068 -0.481 -3.651 9
0.363 -0.65 -1.862 8
-0.325 -0.845 -0.416 9
-0.292 -0.76 -0.375 8
-0.66 -0.878 0.511 8
-0.685 -0.879 0.659 9
-0.354 -0.729 -0.006 8
0.288 -0.314 -1.168 7
0.891 0.269 -2.298 10
1.222 0.782 -2.952 8
1.1 0.704 -2.657 9
1.196 1.106 -2.607 8
1.094 1.283 -1.78 8
0.893 1.254 -0.622 9
0.612 1.236 0.33 8
0.32 1.35 0.8 9
0.042 1.65 0.649 8
0.038 1.485 0.584 8
-0.224 1.955 0.136 9
-0.395 2.303 -0.209 7
-0.5 2.298 -0.313 10
-0.567 1.985 -0.176 8
-0.547 1.523 0.109 8
-0.492 1.371 0.098 9
-0.36 0.909 0.289 8
-0.005 0.518 0.041 9
0.449 0.283 -0.664 8
0.632 0.331 -1.432 8
0.355 0.789 -1.842 9
-0.118 1.365 -1.752 8
-0.106 1.229 -1.577 9
-0.342 1.455 -1.021 6
-0.348 1.273 -0.164 10
-0.304 0.958 0.73 9
-0.262 0.701 1.561 8
-0.072 0.438 2.36 8
0.419 0.027 2.901 9
0.377 0.024 2.61 8
1.199 -0.458 2.687 9
2.118 -0.914 2.278 8
2.76 -1.218 1.541 8
2.782 -1.24 0.617 9
2.159 -0.909 -0.23 8
1.943 -0.818 -0.207 7
1.018 -0.263 -0.599 10
0.142 0.157 -0.324 8
-0.294 0.203 0.35 9
-0.125 -0.113 0.813 8
0.575 -0.575 0.841 9
1.459 -0.893 0.54 8
1.313 -0.991 0.093 8
2.068 -0.892 0.084 9
2.484 -0.889 -0.26 8
2.507 -0.83 -0.32 9
2.214 -0.74 -0.195 8
1.774 -0.522 -0.046 7
1.324 -0.177 0.075 10
1.191 -0.159 0.067 8
0.753 0.118 0.132 9
0.373 0.262 0.231 8
0.136 0.243 0.369 8
0.049 0.019 0.462 9
0.094 -0.278 0.428 8
0.227 -0.461 0.221 8
0.204 -0.415 0.199 9
0.293 -0.472 -0.107 8
0.22 -0.44 -0.414 9
-0.093 -0.26 -0.516 6
-0.544 0.061 -0.404 10
-0.928 0.338 -0.305 9
-1.141 0.496 -0.212 8
-1.027 0.446 -0.191 9
-1.036 0.479 -0.193 8
-0.857 0.367 -0.428 8
-0.568 0.169 -0.726 9
-0.288 -0.021 -0.944 8
-0.18 -0.172 -1.009 9
-0.286 -0.238 -0.895 8
-0.258 -0.214 -0.806 8
-0.447 -0.144 -0.6 7
-0.511 -0.07 -0.429 10
-0.433 -0.105 -0.353 9
-0.312 -0.137 -0.379 8
-0.234 -0.054 -0.442 8
-0.21 -0.048 -0.398 9
-0.23 0.102 -0.473 8
-0.372 0.264 -0.479 9
-0.614 0.4 -0.365 8
-0.761 0.46 -0.27 8
-0.776 0.407 -0.09 9
-0.531 0.309 -0.269 8
-0.478 0.278 -0.242 7
-0.035 0.247 -0.737 10
0.341 0.197 -0.974 8
0.637 0.074 -1.096 9
0.78 0.003 -1.15 8
0.733 0.061 -1.056 8
0.525 0.152 -0.86 9
0.472 0.137 -0.774 8
0.12 0.304 -0.534 9
-0.181 0.526 -0.262 8
-0.253 0.57 -0.15 8
-0.106 0.46 -0.229 9
0.149 0.375 -0.359 7
0.374 0.359 -0.489 10
0.337 0.323 -0.44 8
0.457 0.332 -0.471 8
0.425 0.364 -0.37 9
0.26 0.452 -0.241 8
-0.014 0.572 -0.019 9
-0.244 0.663 0.275 8
-0.328 0.619 0.423 8
-0.296 0.557 0.38 9
-0.241 0.43 0.271 8
-0.052 0.284 0.023 8
0.158 0.098 -0.152 7
0.32 -0.094 -0.26 10
0.441 -0.222 -0.248 9
0.397 -0.2 -0.223 8
0.531 -0.36 0.002 8
0.59 -0.496 0.353 9
0.44 -0.442 0.623 8
0.234 -0.309 0.705 9
0.167 -0.232 0.634 8
0.193 -0.142 0.35 8
0.173 -0.128 0.315 9
0.224 0.009 -0.062 8
0.357 -0.002 -0.311 7
0.614 -0.126 -0.405 10
0.854 -0.181 -0.446 8
0.924 -0.166 -0.462 9
0.803 -0.13 -0.413 8
0.723 -0.117 -0.371 9
0.493 -0.084 -0.222 8
0.248 -0.054 0.019 8
0.073 -0.035 0.22 9
0.04 -0.037 0.267 8
0.118 -0.06 0.146 8
0.271 -0.073 -0.064 9
0.244 -0.065 -0.057 7
0.393 -0.065 -0.221 10
0.397 -0.054 -0.284 8
0.24 0.009 -0.279 8
0.005 0.151 -0.2 9
-0.196 0.279 -0.026 8
-0.176 0.251 0.099 9
-0.275 0.226 0.089 8
-0.275 0.364 0.085 8
-0.207 0.342 0.04 9
-0.125 0.319 0.034 8
-0.059 0.302 0.098 9
-0.053 0.272 0.088 6
-0.021 0.25 0.231 10
-0.017 0.207 0.417 9
-0.046 0.166 0.6 8
-0.126 0.158 0.731 9
-0.214 0.173 0.812 8
-0.209 0.106 0.841 8
-0.095 -0.051 0.728 9
-0.086 -0.046 0.656 8
0.076 -0.097 0.439 9
0.227 -0.121 0.279 8
0.319 -0.197 0.271 8
0.307 -0.228 0.358 7
0.233 -0.207 0.441 10
0.184 -0.145 0.432 8
0.165 -0.13 0.389 9
0.137 -0.08 0.297 8
0.119 -0.067 0.145 9
0.071 -0.039 -0.08 8
-0.023 0.083 -0.376 8
-0.126 0.249 -0.684 9
-0.217 0.399 -0.97 8
-0.195 0.359 -0.873 9
-0.257 0.468 -1.041 8
-0.238 0.415 -1.003 7
-0.176 0.235 -0.89 10
-0.156 0.108 -0.752 8
-0.178 0.043 -0.577 9
-0.16 0.039 -0.52 8
-0.182 -0.015 -0.377 8
-0.208 -0.034 -0.291 9
-0.231 -0.003 -0.236 8
-0.207 0.024 -0.219 9
-0.17 0.037 -0.217 8
-0.158 0.054 -0.195 8
-0.142 0.048 -0.176 9
-0.129 0.053 -0.121 6
-0.149 0.068 0.03 11
-0.171 0.09 0.25 8
-0.15 0.094 0.345 8
-0.095 0.083 0.389 9
-0.013 0.038 0.407 8
-0.012 0.034 0.367 8
0.069 0.001 0.196 9
0.132 0.022 -0.059 8
0.139 0.058 -0.243 9
0.046 0.102 -0.246 8
-0.154 0.145 -0.012 8
-0.139 0.131 -0.011 7
-0.396 0.187 0.29 10
-0.517 0.219 0.456 9
-0.403 0.17 0.432 8
-0.215 0.116 0.205 8
-0.07 0.127 -0.029 9
-0.056 0.157 -0.127 8
-0.147 0.2 -0.124 9
-0.132 0.18 -0.111 8
-0.187 0.161 0.088 8
-0.155 0.035 0.396 9
-0.055 -0.089 0.618 8
0.074 -0.216 0.731 7
0.181 -0.352 0.743 10
0.162 -0.317 0.669 8
0.231 -0.371 0.604 9
0.247 -0.301 0.486 8
0.237 -0.174 0.305 8
0.241 -0.058 0.055 9
0.225 0.042 -0.132 8
0.154 0.131 -0.122 9
0.138 0.118 -0.11 8
0.029 0.169 0.061 8
0.002 0.113 0.187 9
0.117 -0.01 0.12 7
0.287 -0.073 -0.062 10
0.387 -0.051 -0.32 8
0.323 0.072 -0.555 8
0.291 0.065 -0.5 9
0.157 0.229 -0.609 8
0.056 0.323 -0.619 9
-0.044 0.35 -0.491 8
-0.163 0.346 -0.204 8
-0.208 0.291 0.016 9
-0.147 0.174 0.038 8
-0.132 0.157 0.034 9
-0.049 0.059 -0.09 6
0.01 0.06 -0.327 10
0.086 -0.001 -0.525 9
0.161 -0.159 -0.544 8
0.186 -0.219 -0.519 8
0.17 -0.194 -0.561 9
0.153 -0.174 -0.505 8
0.131 -0.145 -0.439 9
0.09 -0.096 -0.249 8
-0.008 0.032 0.063 8
-0.099 0.193 0.406 9
-0.118 0.251 0.55 8
-0.106 0.226 0.495 7
-0.025 0.15 0.395 10
0.143 0.028 0.107 8
0.3 -0.098 -0.141 9
0.334 -0.166 -0.255 8
0.259 -0.171 -0.313 9
0.179 -0.161 -0.321 8
0.161 -0.145 -0.289 8
0.088 -0.116 -0.274 9
0.034 -0.076 -0.312 8
0.004 -0.007 -0.432 9
-0.05 0.085 -0.532 8
-0.139 0.195 -0.471 7
-0.215 0.276 -0.302 10
-0.194 0.249 -0.272 8
-0.218 0.273 -0.174 9
-0.201 0.266 -0.187 8
-0.196 0.243 -0.189 8
-0.197 0.211 -0.128 9
-0.151 0.135 -0.073 8
-0.081 0.02 -0.053 8
-0.073 0.018 -0.048 9
-0.017 -0.067 -0.024 8
0.01 -0.114 0.018 9
-0.012 -0.101 0.056 6
-0.059 -0.025 0.086 10
-0.104 0.069 0.102 9
-0.093 0.062 0.107 8
-0.138 0.056 0.096 9
-0.16 0.197 0.084 8
-0.165 0.224 0.079 8
-0.154 0.197 0.179 9
-0.151 0.111 0.376 8
-0.166 0.062 0.611 9
-0.15 0.056 0.55 8
-0.177 0.035 0.736 8
-0.164 0.024 0.758 7
-0.1 0.015 0.683 10
-0.069 -0.009 0.62 9
-0.049 -0.029 0.521 8
0.017 -0.06 0.288 8
0.016 -0.054 0.259 9
0.1 -0.097 -0.01 8
0.122 -0.08 -0.184 9
0.079 -0.012 -0.253 8
0.038 0.02 -0.256 8
0.009 -0.015 -0.203 9
-0.018 -0.072 -0.099 8
-0.016 -0.065 -0.089 7
-0.004 -0.122 -0.061 10
0.021 -0.144 -0.153 8
0.023 -0.097 -0.244 9
0.04 -0.045 -0.284 8
0.061 -0.006 -0.306 8
0.064 0.027 -0.3 9
0.058 0.025 -0.27 8
0.011 0.068 -0.22 9
-0.054 0.099 -0.081 8
-0.076 0.102 -0.017 8
-0.084 0.117 -0.108 9
-0.075 0.105 -0.097 7
-0.108 0.062 -0.271 10
-0.104 -0.001 -0.271 8
-0.08 -0.003 -0.11 8
-0.09 0.036 0.016 9
-0.068 0.075 0.193 8
0.003 0.062 0.211 9
0.017 0.073 0.044 8
0.015 0.066 0.04 8
0.01 0.087 -0.098 9
# end
#Thu Feb 26 20:41:34 GMT+08:00 20152
