# Supplementary material for: Abnormal Gait Behavior Detection for Elderly Based on Enhanced Wigner-Ville Analysis and Cloud Incremental SVM Learning
Source: Hindawi journal article supplement (doi:10.1155/2016/5869238), 2016-01-01
Supplement: f1 [file 5869238.f1.zip › Supplementary Materials/Original Data/Rightward fall Ending lying/original__139.txt]

# Accelerometer Values
# filename:  original__139.txt
# Saving start time: Thu Feb 26 20:41:38 GMT+08:00 2015

# sensor resolution: 0.0095825195m/s^2
#Sensorvendor: KIONIX, name: KX023 Accelerometer, type: 1,version : 1, range 39.240005

# X value, Y value, Z value, time diff in ms
0.015 -0.148 0.395 8
-0.01 -0.084 0.242 8
-0.009 -0.075 0.218 9
-0.046 0.025 -0.023 8
-0.071 0.13 -0.333 8
-0.068 0.19 -0.563 7
-0.048 0.214 -0.665 10
-0.025 0.219 -0.692 9
-0.013 0.201 -0.647 8
-0.012 0.181 -0.583 8
-0.004 0.133 -0.496 9
-0.003 0.09 -0.415 8
-0.01 0.083 -0.36 9
-0.014 0.073 -0.326 8
-0.025 0.074 -0.303 8
-0.031 0.078 -0.284 9
-0.028 0.071 -0.256 8
-0.013 0.034 -0.232 7
0.0 -0.005 -0.204 10
0.006 -0.023 -0.183 8
0.031 -0.046 -0.155 9
0.06 -0.078 -0.101 8
0.054 -0.07 -0.091 9
0.057 -0.077 -0.041 8
0.047 -0.054 -0.018 8
0.06 -0.059 0.005 9
0.085 -0.084 0.022 8
0.095 -0.081 -0.003 8
0.087 -0.05 -0.041 9
0.079 -0.045 -0.037 7
0.084 -0.034 -0.06 10
0.116 -0.054 -0.08 8
0.131 -0.062 -0.092 8
0.103 -0.043 -0.089 9
0.066 -0.023 -0.079 8
0.04 0.003 -0.065 9
0.036 0.003 -0.059 8
0.019 0.035 -0.051 8
0.016 0.029 -0.037 9
0.019 0.0 -0.008 8
0.025 -0.009 0.051 9
0.023 -0.008 0.046 6
0.138 -0.068 0.278 10
0.124 -0.061 0.25 9
0.198 -0.067 0.325 8
0.275 -0.051 0.303 9
0.421 -0.063 0.191 8
0.605 -0.121 0.045 8
0.798 -0.185 -0.069 9
0.718 -0.167 -0.062 8
0.928 -0.224 -0.083 9
1.105 -0.32 -0.059 8
1.217 -0.427 -0.04 8
1.244 -0.515 0.006 7
1.218 -0.629 0.023 10
1.174 -0.835 -0.036 8
1.056 -0.751 -0.032 9
1.023 -1.01 -0.112 8
0.974 -1.173 -0.237 9
0.84 -1.191 -0.452 8
0.649 -1.184 -0.694 8
0.41 -1.123 -0.945 9
0.093 -0.978 -1.075 8
0.084 -0.88 -0.968 9
-0.228 -0.745 -0.977 8
-0.392 -0.574 -1.014 7
-0.372 -0.445 -1.091 10
-0.326 -0.374 -1.165 8
-0.278 -0.327 -1.251 9
-0.25 -0.312 -1.368 8
-0.225 -0.28 -1.231 8
-0.284 -0.233 -1.275 9
-0.501 -0.11 -1.079 8
-0.713 -0.037 -0.852 9
-0.773 -0.063 -0.782 8
-0.757 -0.15 -0.816 8
-0.681 -0.135 -0.734 9
-0.61 -0.229 -0.912 6
-0.465 -0.265 -1.144 11
-0.38 -0.235 -1.265 8
-0.416 -0.151 -1.248 8
-0.564 -0.011 -1.149 9
-0.734 0.097 -0.978 8
-0.66 0.087 -0.88 8
-0.751 0.033 -0.765 9
-0.738 -0.107 -0.739 8
-0.653 -0.302 -0.714 9
-0.522 -0.6 -0.677 8
-0.404 -0.95 -0.624 8
-0.364 -0.855 -0.562 7
-0.278 -1.195 -0.504 10
-0.193 -1.474 -0.449 9
-0.089 -1.636 -0.408 8
0.021 -1.677 -0.375 8
0.089 -1.656 -0.347 9
0.114 -1.609 -0.312 8
0.096 -1.554 -0.272 9
0.087 -1.399 -0.245 8
0.032 -1.275 -0.2 8
-0.004 -1.068 -0.168 9
-0.019 -0.884 -0.164 8
-0.055 -0.744 -0.16 7
-0.117 -0.635 -0.057 10
-0.105 -0.572 -0.051 8
-0.183 -0.494 0.247 9
-0.329 -0.439 0.68 8
-0.607 -0.393 1.164 8
-0.999 -0.312 1.705 9
-1.384 -0.132 2.145 8
-1.64 0.209 2.434 9
-1.476 0.188 2.19 8
-1.617 0.573 2.217 8
-1.66 0.967 1.79 9
-1.599 1.437 1.2 7
-1.539 1.771 0.769 10
-1.514 1.791 0.858 8
-1.426 1.517 1.63 8
-1.284 1.365 1.467 9
-1.093 0.987 2.477 8
-0.84 0.745 3.141 9
-0.628 0.717 3.271 8
-0.491 0.925 2.977 8
-0.454 1.379 2.546 9
-0.501 1.912 2.189 8
-0.45 1.721 1.97 9
-0.646 2.202 1.784 6
-0.975 2.512 1.825 10
-1.239 2.516 2.144 9
-1.274 2.224 2.755 8
-1.111 1.823 3.547 9
-1.0 1.641 3.193 8
-0.714 1.436 3.898 8
-0.423 1.547 4.09 9
-0.256 1.874 3.645 8
-0.246 2.3 2.825 8
-0.468 2.873 1.989 9
-0.879 3.468 1.44 8
-0.791 3.122 1.296 7
-1.229 3.526 1.219 10
-1.489 3.44 1.709 8
-1.479 2.701 2.615 9
-1.275 1.622 3.553 8
-1.043 0.594 4.309 9
-0.777 -0.16 4.657 8
-0.7 -0.144 4.192 8
-0.525 -0.569 3.938 9
-0.981 -0.736 3.522 8
-2.081 -0.745 3.692 9
-3.144 -0.775 4.353 8
-2.83 -0.881 4.897 7
-3.575 -1.034 4.721 10
-3.217 -0.931 4.249 8
-2.379 -1.318 3.017 9
-1.152 -1.852 0.743 8
0.099 -2.306 -1.986 8
1.132 -2.679 -4.394 9
1.703 -3.062 -5.801 8
1.532 -2.755 -5.221 8
1.585 -3.166 -5.384 9
1.239 -3.395 -4.69 8
0.571 -3.231 -3.658 9
-0.281 -2.647 -2.718 6
-0.986 -1.977 -2.271 10
-1.324 -1.604 -2.296 9
-1.191 -1.443 -2.067 8
-1.226 -1.546 -2.495 9
-0.856 -1.971 -3.275 8
-0.152 -2.399 -4.234 8
0.553 -2.668 -4.927 9
0.975 -2.802 -5.046 8
1.02 -2.773 -4.633 9
0.918 -2.495 -4.169 8
0.794 -2.333 -3.52 8
0.632 -2.009 -3.043 7
0.457 -1.448 -2.87 10
0.378 -0.865 -2.748 9
0.408 -0.482 -2.531 8
0.518 -0.286 -2.318 8
0.466 -0.258 -2.086 9
0.668 -0.16 -1.943 8
0.873 -0.107 -1.721 9
0.936 -0.078 -1.351 8
0.762 -0.068 -0.878 8
0.46 -0.06 -0.371 9
0.414 -0.054 -0.334 8
0.285 0.075 -0.139 7
0.518 0.496 -0.807 10
0.992 1.114 -2.292 8
1.344 1.765 -3.898 9
1.22 2.494 -5.007 8
0.591 3.364 -5.114 8
0.532 3.027 -4.603 9
-0.304 3.854 -3.37 8
-1.353 4.207 -0.854 9
-2.517 4.117 2.261 8
-3.163 3.63 4.789 8
-2.654 2.761 5.895 9
-2.388 2.485 5.305 7
-0.72 1.7 4.916 10
1.363 1.173 3.326 8
3.116 0.785 1.478 8
4.251 0.494 0.07 9
4.722 0.356 -0.755 8
4.556 0.473 -1.093 9
3.66 0.837 -0.926 8
3.294 0.753 -0.834 8
1.784 1.352 -0.041 9
0.223 1.994 0.913 8
-0.795 2.34 1.251 8
-1.032 2.288 0.913 7
-0.568 1.906 0.25 10
-0.511 1.715 0.225 9
0.26 1.105 -0.544 8
0.983 0.377 -1.252 8
1.465 -0.237 -1.569 9
1.546 -0.607 -1.277 8
1.344 -0.828 -0.675 9
1.017 -1.034 -0.201 8
0.915 -0.931 -0.181 8
0.488 -1.082 0.147 9
0.178 -1.139 0.419 8
0.195 -1.224 0.509 7
0.429 -1.371 0.463 10
0.634 -1.486 0.519 8
0.799 -1.389 0.753 9
0.719 -1.25 0.678 8
0.802 -0.9 0.889 9
0.682 -0.396 0.888 8
0.443 0.113 0.687 8
0.185 0.552 0.38 9
0.108 0.933 0.069 8
0.315 1.066 -0.262 8
0.283 0.96 -0.235 9
0.594 0.804 -0.51 7
0.859 0.549 -0.523 10
0.937 0.244 -0.395 8
0.729 -0.086 -0.135 8
0.327 -0.431 0.34 9
0.295 -0.758 0.793 8
0.265 -0.682 0.714 9
-0.291 -1.044 0.996 8
-0.073 -1.42 1.148 8
0.315 -1.741 1.262 9
0.669 -2.008 1.38 8
0.864 -2.131 1.554 9
0.777 -1.918 1.399 6
0.805 -1.898 1.585 10
0.673 -1.758 1.654 9
0.379 -1.461 1.486 8
-0.126 -0.996 1.126 9
-0.713 -0.48 0.793 8
-1.101 -0.092 0.562 8
-0.991 -0.082 0.506 9
-1.117 0.084 0.356 8
-1.026 0.098 0.293 9
-0.708 -0.018 0.292 8
-0.328 -0.176 0.267 8
-0.097 -0.234 0.168 7
0.008 -0.195 -0.028 10
0.007 -0.176 -0.025 9
0.054 -0.07 -0.292 8
0.081 0.085 -0.511 8
0.122 0.225 -0.613 9
0.171 0.334 -0.662 8
0.158 0.439 -0.696 8
0.092 0.524 -0.641 9
0.083 0.471 -0.577 8
0.044 0.499 -0.45 9
0.116 0.436 -0.333 8
0.379 0.245 -0.286 7
0.731 0.009 -0.355 10
0.966 -0.1 -0.574 8
0.87 -0.09 -0.516 9
0.849 0.013 -0.732 8
0.556 0.236 -0.734 8
0.133 0.427 -0.539 9
-0.153 0.535 -0.379 8
-0.14 0.566 -0.398 9
0.078 0.496 -0.551 8
0.07 0.446 -0.496 8
0.347 0.309 -0.708 9
0.608 0.204 -0.839 6
0.738 0.137 -0.858 11
0.635 0.115 -0.762 8
0.359 0.135 -0.406 8
0.059 0.131 0.142 9
0.053 0.118 0.128 8
-0.011 -0.037 0.742 8
0.121 -0.193 0.915 9
0.289 -0.12 0.563 8
0.421 -0.062 0.222 9
0.439 -0.065 0.025 8
0.351 0.005 -0.024 9
0.316 0.005 -0.021 6
0.178 0.069 0.052 10
0.068 0.068 0.19 9
0.038 0.01 0.25 8
0.053 -0.006 0.185 8
0.031 0.041 0.066 9
-0.039 0.094 -0.024 8
-0.035 0.084 -0.021 9
-0.183 0.161 -0.028 8
-0.311 0.217 0.051 8
-0.282 0.162 0.173 9
-0.117 0.011 0.314 8
-0.105 0.01 0.282 7
0.052 -0.131 0.381 10
0.126 -0.145 0.399 8
0.138 -0.064 0.219 9
0.163 0.003 -0.078 8
0.268 0.035 -0.299 8
0.408 0.04 -0.545 9
0.478 0.041 -0.764 8
0.43 0.037 -0.688 9
0.392 0.023 -0.741 8
0.268 -0.063 -0.51 8
0.072 -0.123 -0.029 9
-0.139 -0.126 0.457 7
-0.254 -0.087 0.751 10
-0.267 0.008 0.733 8
-0.24 0.007 0.66 8
-0.219 0.12 0.414 9
-0.151 0.248 0.072 8
-0.032 0.27 -0.293 9
0.074 0.182 -0.574 8
0.109 0.115 -0.614 8
0.029 0.079 -0.531 9
0.026 0.071 -0.478 8
-0.081 0.04 -0.325 9
-0.189 0.001 -0.064 6
-0.265 -0.031 0.111 10
-0.215 -0.038 0.102 9
-0.131 -0.02 -0.052 8
-0.118 -0.018 -0.307 9
-0.084 -0.016 -0.276 8
-0.093 0.119 -0.489 8
-0.087 0.147 -0.447 9
-0.067 0.113 -0.252 8
-0.077 0.079 -0.117 9
-0.081 0.047 -0.082 8
-0.073 0.042 -0.074 8
-0.059 0.01 -0.09 7
-0.048 -0.015 -0.056 10
-0.07 -0.022 0.059 8
-0.07 -0.008 0.193 9
0.002 -0.005 0.274 8
0.097 -0.004 0.223 9
0.087 -0.004 0.201 8
0.163 0.015 -0.003 8
0.172 0.036 -0.235 9
0.103 0.077 -0.304 8
-0.005 0.097 -0.266 9
-0.14 0.098 -0.155 8
-0.126 0.088 -0.14 7
-0.288 0.079 0.11 10
-0.458 0.055 0.321 8
-0.55 0.123 0.361 9
-0.551 0.274 0.184 8
-0.505 0.406 -0.148 8
-0.385 0.429 -0.413 9
-0.267 0.338 -0.53 8
-0.241 0.304 -0.477 9
-0.139 0.171 -0.523 8
-0.029 0.013 -0.501 8
-0.083 -0.101 -0.355 9
-0.266 -0.113 -0.089 6
-0.432 -0.074 0.145 10
-0.389 -0.066 0.131 9
-0.442 -0.062 0.266 8
-0.391 -0.119 0.301 9
-0.332 -0.163 0.135 8
-0.284 -0.148 -0.141 8
-0.255 -0.088 -0.31 9
-0.234 -0.053 -0.318 8
-0.211 -0.048 -0.286 9
-0.193 -0.065 -0.109 8
-0.183 -0.064 0.181 8
-0.156 -0.045 0.403 7
-0.117 -0.066 0.515 10
-0.058 -0.1 0.53 9
-0.024 -0.102 0.499 8
-0.021 -0.092 0.449 8
-0.056 -0.056 0.423 9
-0.087 -0.042 0.369 8
-0.065 -0.06 0.185 9
0.046 -0.04 -0.142 8
0.203 -0.023 -0.433 8
0.305 -0.055 -0.608 9
0.275 -0.05 -0.548 8
0.289 -0.054 -0.475 7
0.099 0.167 -0.255 10
-0.349 0.559 -0.144 8
-0.736 0.773 -0.032 9
-0.781 0.757 0.118 8
-0.703 0.681 0.106 8
-0.457 0.599 0.23 9
-0.107 0.438 0.334 8
# end
#Thu Feb 26 20:41:41 GMT+08:00 20157
