# Supplementary material for: Abnormal Gait Behavior Detection for Elderly Based on Enhanced Wigner-Ville Analysis and Cloud Incremental SVM Learning
Source: Hindawi journal article supplement (doi:10.1155/2016/5869238), 2016-01-01
Supplement: f1 [file 5869238.f1.zip › Supplementary Materials/Original Data/Rightward fall Ending lying/original__140.txt]

# Accelerometer Values
# filename:  original__140.txt
# Saving start time: Thu Feb 26 20:41:44 GMT+08:00 2015

# sensor resolution: 0.0095825195m/s^2
#Sensorvendor: KIONIX, name: KX023 Accelerometer, type: 1,version : 1, range 39.240005

# X value, Y value, Z value, time diff in ms
0.129 0.038 -0.21 7
-0.005 0.175 -0.523 10
-0.138 0.345 -0.709 8
-0.218 0.464 -0.763 9
-0.22 0.47 -0.736 8
-0.198 0.423 -0.662 8
-0.155 0.352 -0.582 9
-0.115 0.263 -0.466 8
-0.067 0.174 -0.367 9
-0.01 0.095 -0.303 8
0.035 0.03 -0.195 8
0.053 -0.013 -0.026 9
0.048 -0.011 -0.024 6
0.032 -0.035 0.137 11
0.0 -0.06 0.261 8
-0.043 -0.081 0.358 8
-0.097 -0.063 0.376 9
-0.151 -0.002 0.242 8
-0.182 0.053 0.066 9
-0.164 0.048 0.06 8
-0.139 0.009 -0.017 8
-0.062 -0.087 0.0 9
-0.001 -0.152 0.046 8
0.02 -0.187 0.06 8
0.018 -0.168 0.054 7
0.021 -0.145 -0.006 10
0.003 -0.044 -0.139 9
-0.034 0.071 -0.259 8
-0.05 0.131 -0.317 8
-0.039 0.136 -0.314 9
0.002 0.103 -0.188 8
0.05 0.037 0.052 9
0.045 0.033 0.047 8
0.058 -0.003 0.239 8
0.06 -0.005 0.289 9
0.086 -0.017 0.288 8
0.093 -0.049 0.291 7
0.066 -0.071 0.297 10
0.045 -0.083 0.294 8
0.04 -0.075 0.265 9
0.035 -0.097 0.216 8
0.018 -0.076 0.107 9
-0.004 -0.02 -0.081 8
-0.021 0.039 -0.26 8
-0.029 0.086 -0.323 9
0.007 0.078 -0.275 8
0.007 0.07 -0.247 9
0.048 0.021 -0.154 8
0.041 -0.023 -0.083 7
0.011 -0.032 -0.035 10
-0.028 -0.018 0.002 8
-0.066 0.009 0.037 8
-0.059 0.008 0.034 9
-0.083 0.051 0.094 8
-0.085 0.067 0.147 9
-0.071 0.033 0.118 8
-0.064 -0.009 0.02 8
-0.066 -0.009 -0.05 9
-0.072 -0.009 -0.067 8
-0.065 -0.008 -0.06 9
-0.085 -0.002 -0.067 6
-0.097 0.027 -0.071 10
-0.06 -0.01 -0.111 9
0.007 -0.074 -0.196 8
0.061 -0.062 -0.271 9
0.079 -0.005 -0.272 8
0.071 -0.005 -0.245 8
0.071 0.026 -0.138 9
0.086 0.007 0.013 8
0.126 -0.006 0.107 9
0.17 -0.007 0.136 8
0.192 -0.018 0.125 8
0.172 -0.016 0.112 7
0.195 -0.017 0.068 10
0.25 -0.051 0.059 8
0.342 -0.124 0.111 9
0.438 -0.194 0.17 8
0.515 -0.243 0.202 9
0.563 -0.266 0.206 8
0.506 -0.239 0.185 8
0.526 -0.268 0.189 9
0.538 -0.291 0.218 8
0.58 -0.294 0.243 9
0.714 -0.283 0.203 8
0.938 -0.27 0.11 7
1.174 -0.278 -0.022 10
1.057 -0.25 -0.019 8
1.259 -0.263 -0.231 9
1.411 -0.262 -0.43 8
1.545 -0.284 -0.524 8
1.62 -0.376 -0.534 9
1.592 -0.519 -0.497 8
1.487 -0.692 -0.444 9
1.338 -0.623 -0.4 8
1.141 -0.776 -0.352 8
0.868 -0.83 -0.318 9
0.632 -0.825 -0.309 6
0.473 -0.797 -0.416 11
0.37 -0.765 -0.648 8
0.333 -0.714 -0.878 8
0.3 -0.643 -0.79 9
0.108 -0.58 -0.93 8
-0.009 -0.517 -0.982 8
-0.111 -0.449 -0.999 9
-0.208 -0.377 -0.956 8
-0.29 -0.313 -0.844 9
-0.261 -0.282 -0.759 8
-0.357 -0.228 -0.622 8
-0.445 -0.203 -0.41 7
-0.507 -0.206 -0.135 10
-0.542 -0.205 0.105 9
-0.511 -0.215 0.171 8
-0.419 -0.255 0.006 8
-0.377 -0.229 0.005 9
-0.285 -0.239 -0.288 8
-0.429 -0.149 -0.478 9
-0.855 0.108 -0.458 8
-1.377 0.487 -0.394 8
-1.878 0.83 -0.308 9
-2.172 0.952 -0.101 8
-1.955 0.857 -0.091 7
-2.015 0.761 0.179 10
-1.928 0.547 0.348 8
-1.782 0.239 0.338 9
-1.601 -0.091 0.142 8
-1.437 -0.34 -0.121 8
-1.293 -0.49 -0.34 9
-1.164 -0.441 -0.306 8
-1.078 -0.64 -0.545 9
-0.966 -0.901 -0.812 8
-0.856 -1.122 -0.973 8
-0.765 -1.308 -0.984 9
-0.688 -1.177 -0.886 7
-0.632 -1.357 -0.818 10
-0.58 -1.504 -0.761 8
-0.485 -1.586 -0.903 8
-0.287 -1.564 -1.231 9
-0.108 -1.474 -1.518 8
-0.055 -1.353 -1.664 9
-0.018 -1.225 -1.661 8
-0.017 -1.102 -1.495 8
0.054 -1.004 -1.413 9
0.112 -0.92 -1.219 8
0.121 -0.847 -0.968 9
0.048 -0.774 -0.745 6
-0.132 -0.678 -0.468 10
-0.355 -0.484 -0.172 9
-0.32 -0.436 -0.155 8
-0.586 -0.128 -0.013 9
-0.893 0.24 0.066 8
-1.17 0.58 0.26 8
-1.39 0.713 0.568 9
-1.454 0.616 0.899 8
-1.308 0.318 1.125 8
-1.107 0.286 1.013 9
-0.754 -0.112 1.099 8
-0.579 -0.186 1.172 7
-0.795 0.207 1.377 10
-1.275 0.795 1.564 8
-1.76 1.468 1.424 9
-1.584 1.321 1.282 8
-1.905 1.99 0.891 9
-1.927 2.376 0.558 8
-1.702 2.327 0.425 8
-1.375 2.02 0.615 9
-1.13 1.69 1.186 8
-1.127 1.468 1.961 9
-1.014 1.321 1.765 8
-1.344 1.329 2.425 7
-1.938 1.516 2.877 10
-2.431 1.659 3.149 8
-2.416 1.536 3.173 9
-1.869 1.274 3.084 8
-1.068 1.163 2.881 8
-0.961 1.046 2.593 9
-0.231 1.281 2.306 8
0.263 1.744 2.19 9
0.432 2.153 2.429 8
0.336 2.438 2.922 8
0.163 2.489 3.261 9
0.147 2.24 2.935 6
0.013 2.083 2.834 10
-0.197 2.079 2.456 9
-0.699 2.243 2.106 8
-1.229 2.124 2.068 9
-1.274 1.51 2.525 8
-0.673 0.672 2.889 8
-0.605 0.605 2.6 9
0.203 0.092 2.251 8
0.253 0.069 1.43 9
-0.698 -0.019 1.066 8
-1.845 -0.54 2.174 8
-2.664 -1.15 4.736 7
-2.796 -1.379 7.718 10
-2.517 -1.241 6.946 9
-2.68 -1.76 8.929 8
-2.522 -2.142 8.708 8
-1.34 -1.691 5.87 9
0.067 -1.055 1.28 8
1.196 -0.431 -3.217 9
1.858 -0.152 -6.388 8
1.672 -0.137 -5.749 8
2.073 -0.528 -6.864 9
2.234 -1.455 -5.881 8
2.186 -2.502 -3.92 7
1.947 -3.377 -1.989 10
1.515 -3.985 -0.494 8
1.063 -4.344 0.256 9
0.957 -3.909 0.231 8
0.634 -4.038 0.047 8
0.423 -3.821 -0.987 9
0.333 -3.323 -2.58 8
0.357 -2.806 -4.342 9
0.355 -2.307 -5.826 8
0.32 -2.076 -5.244 8
0.221 -1.564 -6.115 9
0.045 -1.143 -5.95 7
-0.177 -1.017 -4.908 10
-0.264 -1.141 -3.683 8
-0.089 -1.25 -2.776 8
0.306 -1.23 -2.354 9
0.275 -1.107 -2.119 8
0.739 -0.968 -2.154 9
0.97 -0.613 -2.384 8
0.842 0.033 -2.508 8
0.507 0.747 -2.436 9
0.188 1.312 -2.159 8
0.112 1.676 -1.761 9
0.101 1.508 -1.585 6
0.317 1.65 -1.286 10
0.648 1.65 -1.1 9
0.84 1.705 -0.981 8
0.735 1.813 -0.873 8
0.335 1.75 -0.571 9
0.302 1.575 0.103 8
-0.208 1.418 0.092 9
-0.597 0.871 1.054 8
-0.626 0.367 1.823 8
-0.218 -0.039 1.849 9
0.47 -0.148 1.045 8
0.423 -0.133 0.941 7
1.02 0.078 -0.152 10
1.159 0.54 -0.948 8
0.779 1.18 -1.154 9
0.086 1.839 -0.662 8
-0.744 2.363 0.315 9
-1.571 2.728 1.338 8
-1.997 2.687 1.908 8
-1.797 2.418 1.717 9
-1.652 2.007 1.776 8
-1.091 1.525 1.619 9
-0.364 1.025 1.382 8
0.401 0.538 1.08 7
1.139 0.197 0.776 10
1.633 0.03 0.573 8
1.469 0.027 0.516 9
1.626 0.065 0.455 8
1.54 0.325 0.525 8
1.231 0.633 0.684 9
0.821 0.909 0.893 8
0.645 1.135 1.078 8
0.581 1.022 0.97 9
0.736 1.062 0.933 8
1.033 0.925 0.646 9
1.353 0.705 0.22 6
1.584 0.437 -0.182 10
1.665 0.106 -0.425 9
1.71 -0.261 -0.49 8
1.539 -0.235 -0.441 9
1.636 -0.549 -0.32 8
1.7 -0.836 -0.012 8
1.696 -1.08 0.382 9
1.648 -1.22 0.681 8
1.522 -1.219 0.777 9
1.312 -1.006 0.67 8
1.18 -0.905 0.603 8
0.953 -0.621 0.429 7
0.762 -0.391 0.338 10
0.715 -0.261 0.288 9
0.819 -0.286 0.229 8
0.909 -0.421 0.179 8
0.917 -0.543 0.156 9
0.825 -0.489 0.14 8
0.757 -0.526 0.14 8
0.623 -0.481 0.181 9
0.467 -0.397 0.169 8
0.273 -0.259 -0.062 9
-0.008 -0.043 -0.45 8
-0.007 -0.039 -0.405 7
-0.276 0.158 -0.786 10
-0.413 0.252 -1.138 8
-0.446 0.243 -1.433 9
-0.402 0.134 -1.57 8
-0.219 -0.033 -1.558 8
0.082 -0.171 -1.483 9
0.074 -0.154 -1.335 8
0.318 -0.242 -1.226 9
0.408 -0.268 -1.036 8
0.314 -0.235 -0.859 8
0.023 -0.128 -0.729 9
-0.366 0.064 -0.641 6
-0.7 0.249 -0.65 11
-0.63 0.224 -0.585 8
-0.845 0.394 -0.652 8
-0.92 0.587 -0.733 9
-0.852 0.705 -0.767 8
-0.846 0.674 -0.139 9
-0.604 0.5 -0.048 8
0.03 0.398 -0.735 8
0.027 0.358 -0.662 9
0.35 0.266 -0.774 8
0.298 0.223 -0.742 9
0.153 0.44 -0.8 6
-0.1 0.703 -0.884 10
-0.336 0.873 -0.918 9
-0.449 0.903 -0.797 8
-0.404 0.813 -0.718 8
-0.424 0.729 -0.442 9
-0.292 0.565 -0.113 8
-0.071 0.318 0.22 9
0.079 0.006 0.689 8
0.147 -0.315 1.354 8
0.132 -0.284 1.219 9
0.132 -0.362 1.596 8
-0.066 -0.039 1.392 7
-0.311 0.33 0.943 10
-0.234 0.435 0.615 8
0.095 0.191 0.574 9
0.456 -0.18 0.631 8
0.41 -0.162 0.568 9
0.683 -0.381 0.558 8
0.804 -0.47 0.493 8
0.852 -0.5 0.413 9
0.866 -0.488 0.306 8
0.854 -0.436 0.164 8
0.856 -0.401 0.076 9
0.771 -0.361 0.068 7
0.811 -0.371 0.051 10
0.879 -0.405 0.056 8
0.854 -0.39 0.146 8
0.676 -0.309 0.288 9
0.493 -0.231 0.368 8
0.395 -0.167 0.339 9
0.356 -0.15 0.305 8
0.312 -0.098 0.15 8
0.299 0.037 -0.223 9
0.285 0.128 -0.823 8
0.319 0.06 -1.193 9
0.287 0.054 -1.074 6
0.313 -0.064 -0.826 10
0.234 -0.057 -0.744 9
0.176 -0.05 -0.481 8
0.168 -0.041 -0.064 9
0.134 0.007 0.338 8
0.124 0.107 0.546 8
0.214 0.179 0.569 9
0.192 0.161 0.512 8
0.331 0.229 0.313 9
0.454 0.27 -0.066 8
0.559 0.16 -0.357 8
0.571 0.008 -0.46 7
0.407 -0.017 -0.508 10
0.161 0.032 -0.519 8
0.145 0.029 -0.467 9
-0.057 0.057 -0.444 8
-0.202 0.098 -0.397 9
-0.277 0.188 -0.309 8
-0.275 0.269 -0.213 8
-0.216 0.282 -0.177 9
-0.162 0.285 -0.163 8
-0.146 0.256 -0.147 9
-0.12 0.274 -0.146 8
-0.114 0.277 -0.147 7
-0.147 0.278 -0.081 10
-0.175 0.193 0.006 8
-0.129 0.004 0.15 9
-0.04 -0.18 0.381 8
-0.036 -0.162 0.343 8
0.001 -0.268 0.595 9
-0.045 -0.284 0.735 8
-0.159 -0.152 0.67 9
-0.316 0.093 0.471 8
-0.437 0.314 0.189 8
-0.393 0.416 -0.098 9
-0.354 0.374 -0.088 6
-0.293 0.323 -0.224 11
-0.135 0.174 -0.128 8
-0.027 0.018 0.143 8
-0.045 -0.033 0.414 9
-0.134 0.005 0.545 8
-0.12 0.005 0.49 8
-0.217 0.051 0.51 9
-0.275 0.126 0.438 8
-0.245 0.17 0.232 9
-0.15 0.158 -0.049 8
-0.04 0.122 -0.269 8
-0.036 0.11 -0.242 7
0.069 0.044 -0.404 10
0.144 0.024 -0.54 9
0.165 0.061 -0.613 8
0.106 0.102 -0.616 8
-0.027 0.145 -0.562 9
-0.106 0.122 -0.418 8
-0.071 0.0 -0.27 9
-0.063 0.0 -0.243 8
0.0 -0.095 -0.181 8
0.028 -0.1 -0.111 9
0.036 -0.089 -0.03 8
0.045 -0.069 -0.039 7
0.054 -0.076 -0.121 10
0.048 -0.068 -0.108 8
0.043 -0.031 -0.195 9
-0.043 0.081 -0.305 8
-0.179 0.122 -0.194 8
-0.283 0.086 0.199 9
-0.353 0.034 0.519 8
-0.32 -0.048 0.605 9
-0.288 -0.043 0.544 8
-0.089 -0.184 0.558 8
0.155 -0.328 0.484 9
0.372 -0.407 0.297 7
0.527 -0.403 0.106 10
0.514 -0.325 0.05 8
0.359 -0.161 0.222 8
0.323 -0.145 0.199 9
0.127 0.092 0.313 8
-0.029 0.301 0.232 9
-0.111 0.399 0.103 8
-0.152 0.4 -0.056 8
-0.205 0.357 -0.15 9
# end
#Thu Feb 26 20:41:48 GMT+08:00 20151
