# Supplementary material for: Abnormal Gait Behavior Detection for Elderly Based on Enhanced Wigner-Ville Analysis and Cloud Incremental SVM Learning
Source: Hindawi journal article supplement (doi:10.1155/2016/5869238), 2016-01-01
Supplement: f1 [file 5869238.f1.zip › Supplementary Materials/Original Data/Sitting on a chair then standing/original__12.txt]

# Accelerometer Values
# filename:  original__12.txt
# Saving start time: Thu Feb 26 20:18:49 GMT+08:00 2015

# sensor resolution: 0.0095825195m/s^2
#Sensorvendor: KIONIX, name: KX023 Accelerometer, type: 1,version : 1, range 39.240005

# X value, Y value, Z value, time diff in ms
-0.031 0.006 -0.032 8
-0.028 0.005 -0.029 8
0.043 -0.005 -0.037 9
0.114 -0.028 -0.042 8
0.146 -0.048 -0.024 9
0.119 -0.053 0.009 8
0.05 -0.037 0.027 8
0.045 -0.024 0.022 9
-0.018 -0.022 0.02 8
-0.055 -0.02 0.016 8
-0.083 -0.014 0.018 7
-0.105 -0.004 0.015 10
-0.079 -0.005 -0.006 9
-0.003 -0.023 -0.023 8
-0.003 -0.02 -0.021 8
0.047 -0.033 -0.027 9
0.043 -0.019 -0.048 8
0.02 0.001 -0.077 9
0.013 0.001 -0.09 8
0.022 -0.011 -0.087 8
0.015 -0.017 -0.096 9
0.014 -0.016 -0.086 8
-0.005 -0.016 -0.131 7
-0.015 -0.025 -0.201 10
-0.009 -0.038 -0.256 8
-0.006 -0.039 -0.224 9
-0.024 -0.032 -0.11 8
-0.047 -0.026 0.009 8
-0.043 -0.023 0.008 9
-0.05 -0.028 0.122 8
-0.056 -0.047 0.265 9
-0.121 -0.092 0.328 8
-0.11 -0.158 0.333 8
-0.061 -0.243 0.282 9
-0.055 -0.219 0.254 7
-0.076 -0.304 0.12 10
-0.113 -0.38 -0.067 8
-0.036 -0.473 -0.201 8
0.066 -0.511 -0.352 9
0.044 -0.503 -0.667 8
0.026 -0.475 -0.889 9
0.035 -0.408 -0.856 8
0.031 -0.367 -0.771 8
-0.009 -0.335 -0.562 9
-0.077 -0.383 -0.253 8
-0.073 -0.457 0.048 9
-0.052 -0.503 0.229 6
-0.067 -0.516 0.219 10
0.014 -0.523 0.057 9
0.013 -0.47 0.051 8
0.138 -0.466 -0.201 9
0.165 -0.442 -0.464 8
0.198 -0.426 -0.587 8
0.228 -0.415 -0.512 9
0.2 -0.406 -0.271 8
0.117 -0.41 0.049 8
0.106 -0.369 0.044 9
0.022 -0.405 0.361 8
-0.046 -0.499 0.59 7
-0.06 -0.556 0.704 10
-0.067 -0.521 0.654 8
-0.078 -0.456 0.434 9
-0.033 -0.424 0.094 8
-0.029 -0.382 0.085 9
0.017 -0.373 -0.261 8
0.032 -0.316 -0.502 8
0.027 -0.256 -0.578 9
0.003 -0.217 -0.466 8
-0.038 -0.16 -0.255 9
-0.078 -0.097 0.0 8
-0.07 -0.087 0.0 7
-0.097 -0.033 0.216 10
-0.083 0.057 0.264 8
-0.027 0.163 0.088 9
0.052 0.237 -0.235 8
0.129 0.285 -0.504 8
0.116 0.257 -0.63 9
0.14 0.231 -0.567 8
0.115 0.394 -0.591 9
0.066 0.483 -0.444 8
-0.002 0.566 -0.034 8
-0.106 0.623 0.411 9
-0.096 0.56 0.37 6
-0.131 0.685 0.692 10
-0.126 0.827 0.797 9
-0.126 0.893 0.648 8
-0.084 0.991 0.437 9
-0.067 1.142 0.284 8
-0.076 1.263 0.239 8
-0.069 1.275 0.283 9
-0.062 1.147 0.254 8
-0.034 1.099 0.424 9
-0.009 1.024 0.593 8
0.038 0.934 0.547 8
0.095 0.855 0.345 7
0.095 0.797 0.14 10
0.035 0.751 0.008 9
0.031 0.676 0.007 8
-0.059 0.631 -0.071 8
-0.147 0.588 -0.099 9
-0.214 0.556 -0.125 8
-0.209 0.592 -0.222 9
-0.128 0.692 -0.353 8
-0.026 0.774 -0.398 8
-0.024 0.696 -0.358 9
0.041 0.729 -0.189 8
0.028 0.716 0.162 7
-0.068 0.698 0.513 10
-0.18 0.689 0.724 8
-0.229 0.686 0.779 9
-0.189 0.655 0.711 8
-0.17 0.589 0.64 8
-0.075 0.564 0.526 9
0.018 0.579 0.487 8
0.064 0.593 0.554 9
0.062 0.573 0.647 8
0.027 0.508 0.691 8
0.035 0.455 0.648 9
0.031 0.41 0.583 7
0.079 0.358 0.497 10
0.113 0.242 0.381 8
0.156 0.117 0.165 8
0.17 0.019 -0.135 9
0.144 -0.066 -0.361 8
0.094 -0.138 -0.457 9
0.085 -0.124 -0.411 8
0.015 -0.169 -0.429 8
-0.035 -0.191 -0.413 9
-0.021 -0.244 -0.311 8
0.008 -0.35 -0.124 9
0.006 -0.305 0.033 6
-0.003 -0.172 0.094 10
-0.003 -0.155 0.085 9
0.055 -0.176 -0.041 8
0.196 -0.265 -0.339 8
0.303 -0.304 -0.669 9
0.288 -0.273 -0.916 8
0.183 -0.242 -1.024 9
0.072 -0.243 -0.94 8
0.064 -0.218 -0.846 8
-0.05 -0.22 -0.612 9
-0.161 -0.239 -0.339 8
-0.231 -0.258 -0.137 7
-0.299 -0.233 -0.003 10
-0.316 -0.188 0.034 8
-0.204 -0.175 -0.19 9
-0.183 -0.157 -0.171 8
-0.02 -0.17 -0.538 9
0.072 -0.187 -0.847 8
0.141 -0.233 -1.056 8
0.201 -0.271 -1.093 9
0.158 -0.283 -0.955 8
0.083 -0.315 -0.762 9
0.074 -0.283 -0.686 8
0.058 -0.311 -0.53 7
0.071 -0.298 -0.368 10
0.084 -0.283 -0.198 8
0.119 -0.238 -0.091 9
0.133 -0.203 -0.099 8
0.119 -0.183 -0.179 8
0.094 -0.199 -0.161 9
0.061 -0.199 -0.23 8
0.01 -0.206 -0.288 9
-0.057 -0.237 -0.332 8
-0.127 -0.278 -0.383 8
-0.15 -0.314 -0.425 9
-0.135 -0.282 -0.383 6
-0.115 -0.299 -0.351 10
-0.076 -0.297 -0.262 9
-0.014 -0.314 -0.145 8
0.029 -0.331 0.042 9
0.011 -0.326 0.263 8
-0.04 -0.277 0.351 8
-0.036 -0.249 0.316 9
-0.076 -0.148 0.199 8
-0.064 -0.054 0.015 9
0.001 -0.029 -0.156 8
0.075 -0.075 -0.311 8
0.126 -0.118 -0.392 7
0.142 -0.113 -0.437 10
0.127 -0.101 -0.393 9
0.134 -0.065 -0.393 8
0.154 -0.005 -0.268 8
0.133 0.084 -0.08 9
0.042 0.219 0.053 8
-0.055 0.348 0.133 9
-0.104 0.408 0.162 8
-0.094 0.367 0.146 8
-0.102 0.37 0.138 9
-0.087 0.345 0.132 8
-0.072 0.314 0.178 7
-0.071 0.282 0.244 10
-0.069 0.251 0.3 8
-0.059 0.226 0.362 9
-0.053 0.203 0.326 8
-0.062 0.186 0.355 8
-0.098 0.169 0.347 9
-0.131 0.15 0.27 8
-0.141 0.125 0.143 9
-0.142 0.102 0.027 8
-0.121 0.07 -0.061 8
-0.108 0.063 -0.054 9
-0.062 0.019 -0.102 7
-0.001 -0.034 -0.093 10
0.047 -0.099 -0.038 8
0.06 -0.153 -0.021 8
0.046 -0.188 -0.062 9
0.031 -0.2 -0.096 8
0.028 -0.18 -0.086 9
0.035 -0.196 -0.102 8
0.048 -0.215 -0.107 8
0.057 -0.201 -0.106 9
0.078 -0.2 -0.098 8
0.103 -0.208 -0.086 8
0.092 -0.187 -0.077 7
0.107 -0.173 -0.069 10
0.121 -0.17 -0.064 9
0.123 -0.193 -0.06 8
0.098 -0.212 -0.073 8
0.081 -0.229 -0.14 9
0.117 -0.273 -0.24 8
0.184 -0.306 -0.299 9
0.165 -0.275 -0.269 8
0.224 -0.285 -0.274 8
0.252 -0.283 -0.268 9
0.259 -0.273 -0.252 8
0.255 -0.263 -0.224 7
0.223 -0.245 -0.217 10
0.201 -0.22 -0.195 8
0.131 -0.195 -0.204 9
0.048 -0.15 -0.214 8
-0.008 -0.092 -0.218 9
-0.031 -0.046 -0.188 8
-0.044 -0.001 -0.12 8
-0.051 0.037 -0.014 9
-0.046 0.033 -0.013 8
-0.028 0.048 0.106 8
0.0 0.047 0.194 9
0.012 0.056 0.252 7
-0.007 0.08 0.277 10
-0.049 0.103 0.238 8
-0.081 0.113 0.104 8
-0.073 0.102 0.093 9
-0.094 0.101 -0.116 8
-0.114 0.107 -0.348 9
-0.124 0.113 -0.529 8
-0.112 0.071 -0.608 8
-0.08 -0.01 -0.612 9
-0.049 -0.075 -0.552 8
-0.044 -0.067 -0.497 9
-0.022 -0.093 -0.366 6
-0.002 -0.1 -0.196 10
0.007 -0.103 -0.029 9
-0.001 -0.088 0.105 8
-0.023 -0.063 0.178 9
-0.041 -0.028 0.229 8
-0.037 -0.025 0.206 8
-0.061 0.016 0.272 9
-0.098 0.046 0.329 8
-0.116 0.071 0.356 9
-0.091 0.078 0.376 8
-0.049 0.072 0.482 8
-0.044 0.065 0.434 7
-0.014 0.086 0.635 10
-0.003 0.144 0.844 9
-0.035 0.207 0.989 8
-0.092 0.262 0.984 8
-0.123 0.295 0.797 9
-0.116 0.274 0.524 8
-0.089 0.221 0.253 8
-0.08 0.199 0.228 9
-0.047 0.165 0.015 8
-0.014 0.144 -0.108 9
0.022 0.124 -0.17 8
0.055 0.13 -0.174 7
0.058 0.176 -0.117 10
0.048 0.216 -0.004 8
0.043 0.194 -0.003 9
0.03 0.198 0.117 8
0.019 0.184 0.195 8
0.019 0.164 0.231 9
0.023 0.134 0.242 8
0.042 0.111 0.226 9
0.038 0.1 0.203 8
0.072 0.091 0.183 8
0.091 0.077 0.109 9
0.076 0.079 0.167 6
0.024 0.11 0.369 11
-0.052 0.151 0.607 8
-0.153 0.176 0.859 8
-0.138 0.159 0.773 9
-0.261 0.173 1.059 8
-0.403 0.174 1.229 9
-0.452 0.187 1.237 8
-0.392 0.194 1.127 8
-0.299 0.18 0.873 9
-0.174 0.192 0.519 8
-0.156 0.173 0.467 8
-0.062 0.215 0.223 7
-0.007 0.259 0.244 10
0.036 0.303 0.485 9
0.063 0.345 0.88 8
0.057 0.389 1.335 8
0.018 0.453 1.698 9
0.016 0.408 1.528 8
-0.052 0.557 1.854 9
-0.148 0.697 2.048 8
-0.188 0.736 1.946 8
-0.122 0.736 1.562 9
0.001 0.718 1.084 8
0.001 0.646 0.976 7
0.133 0.65 0.634 10
0.23 0.721 0.485 8
0.261 0.845 0.61 9
0.224 0.943 0.921 8
0.145 0.999 1.172 8
0.072 1.011 1.315 9
0.027 0.934 1.356 8
0.024 0.84 1.22 9
0.022 0.69 1.143 8
0.04 0.449 0.954 8
0.061 0.146 0.685 9
0.082 -0.1 0.263 7
0.075 -0.301 -0.205 10
0.022 -0.53 -0.63 8
0.02 -0.477 -0.567 8
-0.075 -0.716 -0.962 9
-0.184 -0.887 -1.197 8
-0.285 -0.96 -1.25 9
-0.368 -1.0 -1.189 8
-0.416 -1.068 -1.056 8
-0.398 -1.189 -0.851 9
-0.358 -1.07 -0.766 8
-0.264 -1.248 -0.547 9
-0.123 -1.458 -0.408 6
-0.015 -1.609 -0.416 10
0.05 -1.625 -0.522 9
0.101 -1.564 -0.632 8
0.139 -1.461 -0.784 9
0.125 -1.315 -0.706 8
0.168 -1.221 -0.923 8
0.211 -1.166 -1.071 9
0.273 -1.142 -1.007 8
0.344 -1.142 -0.716 9
0.374 -1.198 -0.397 8
0.337 -1.078 -0.204 8
0.306 -0.97 -0.184 7
0.229 -1.363 -0.113 10
0.163 -1.505 -0.238 8
0.132 -1.564 -0.525 9
0.095 -1.526 -0.834 8
0.006 -1.432 -1.121 9
0.006 -1.289 -1.009 8
-0.149 -1.182 -1.236 8
-0.3 -1.097 -1.361 9
-0.34 -1.1 -1.393 8
-0.257 -1.163 -1.364 9
-0.129 -1.137 -1.316 8
-0.116 -1.024 -1.185 7
0.018 -1.071 -1.153 10
0.202 -1.166 -1.185 8
0.457 -1.091 -1.182 9
0.652 -0.9 -0.902 8
0.608 -0.662 -0.35 8
0.369 -0.402 0.156 9
0.114 -0.16 0.397 8
0.102 -0.144 0.357 9
-0.057 0.069 0.411 8
-0.076 0.207 0.4 8
-0.015 0.26 0.278 9
0.088 0.333 0.042 6
0.18 0.405 -0.128 11
0.187 0.47 -0.185 8
0.168 0.423 -0.167 8
0.126 0.514 -0.133 9
0.075 0.607 -0.052 8
0.058 0.67 0.094 8
0.053 0.7 0.261 9
0.009 0.72 0.351 8
-0.064 0.733 0.372 9
-0.058 0.659 0.335 8
-0.108 0.676 0.321 8
-0.103 0.652 0.316 7
-0.019 0.602 0.328 10
-0.014 0.601 0.308 9
-0.064 0.629 0.291 8
-0.098 0.708 0.316 8
-0.088 0.637 0.284 9
-0.161 0.77 0.318 8
-0.189 0.854 0.305 9
-0.157 0.87 0.225 8
-0.104 0.825 0.146 8
-0.072 0.734 0.083 9
-0.037 0.629 0.02 8
-0.034 0.566 0.018 7
0.016 0.494 -0.013 10
0.043 0.462 -0.008 8
0.034 0.458 -0.01 9
-0.028 0.47 -0.019 8
-0.115 0.479 0.052 8
-0.104 0.431 0.27 9
-0.211 0.388 0.243 8
-0.282 0.376 0.447 9
-0.207 0.309 0.583 8
-0.186 0.272 0.625 8
-0.248 0.274 0.577 9
-0.223 0.246 0.519 7
-0.227 0.278 0.45 10
-0.216 0.297 0.318 8
-0.186 0.271 0.097 8
-0.114 0.211 -0.147 9
-0.004 0.147 -0.273 8
0.065 0.074 -0.251 9
0.058 0.011 -0.074 8
0.052 0.009 -0.067 8
0.0 -0.001 0.166 9
-0.083 0.037 0.297 8
-0.164 0.086 0.235 9
-0.186 0.117 0.009 6
-0.141 0.126 -0.273 10
-0.047 0.129 -0.559 9
-0.042 0.116 -0.503 8
0.075 0.112 -0.706 9
0.159 0.097 -0.738 8
0.18 0.083 -0.645 8
0.156 0.077 -0.451 9
0.108 0.08 -0.205 8
0.057 0.091 0.015 9
0.051 0.082 0.013 8
0.012 0.101 0.204 8
0.014 0.107 0.346 7
0.053 0.085 0.414 10
0.09 0.068 0.387 8
0.11 0.081 0.311 9
0.095 0.118 0.263 8
0.085 0.106 0.237 9
0.036 0.131 0.233 8
-0.007 0.117 0.192 8
-0.043 0.11 0.087 9
-0.035 0.081 -0.026 8
0.03 0.0 -0.117 9
0.084 -0.089 -0.175 8
0.076 -0.08 -0.157 7
0.089 -0.122 -0.17 10
0.062 -0.099 -0.136 8
0.019 -0.05 -0.1 9
0.009 -0.006 -0.079 8
0.015 0.021 -0.078 8
0.07 0.024 -0.095 9
0.063 0.022 -0.085 8
0.216 -0.011 -0.142 9
0.34 -0.068 -0.3 8
0.387 -0.12 -0.473 8
0.391 -0.159 -0.553 9
0.352 -0.143 -0.497 6
0.3 -0.161 -0.517 10
0.163 -0.116 -0.465 9
-0.019 -0.01 -0.325 8
-0.175 0.085 -0.142 9
-0.261 0.125 -0.003 8
-0.238 0.119 0.09 8
-0.133 0.086 0.131 9
-0.12 0.078 0.117 8
0.014 0.045 0.124 9
0.114 0.026 0.118 8
0.114 0.017 0.095 8
0.077 0.021 0.093 7
0.044 0.025 0.115 10
0.004 0.02 0.149 9
0.004 0.018 0.134 8
-0.038 0.025 0.201 8
-0.095 0.048 0.238 9
-0.152 0.081 0.208 8
-0.186 0.109 0.144 9
-0.185 0.119 0.085 8
-0.165 0.104 0.038 8
-0.148 0.094 0.034 9
-0.131 0.046 0.021 8
-0.125 0.004 0.033 7
-0.175 -0.001 0.022 10
-0.205 0.03 -0.027 8
-0.153 0.05 -0.097 9
-0.094 0.029 -0.183 8
-0.084 0.026 -0.165 8
-0.002 -0.022 -0.341 9
0.099 -0.124 -0.366 8
0.107 -0.163 -0.15 9
-0.038 -0.055 0.014 8
-0.188 0.069 0.072 8
-0.194 0.106 0.069 9
-0.175 0.095 0.062 7
-0.091 0.072 0.05 10
-0.004 0.054 0.064 8
0.058 0.053 0.05 8
0.102 0.059 -0.004 9
0.116 0.075 -0.062 8
0.081 0.109 -0.075 9
0.073 0.098 -0.067 8
0.005 0.16 -0.031 8
-0.022 0.169 0.013 9
0.005 0.069 0.027 8
0.06 -0.022 -0.059 9
0.054 -0.019 -0.053 6
0.142 -0.121 -0.026 10
0.128 -0.109 -0.024 9
0.095 -0.1 0.062 8
0.02 0.002 0.109 8
-0.044 0.095 0.157 9
-0.045 0.12 0.172 8
0.025 0.066 0.145 9
0.023 0.059 0.131 8
0.121 -0.039 0.101 8
0.174 -0.097 0.07 9
0.175 -0.094 0.012 8
0.177 -0.07 -0.079 7
0.18 -0.066 -0.171 10
0.171 -0.074 -0.211 8
0.154 -0.066 -0.19 9
0.128 -0.067 -0.135 8
0.081 -0.068 -0.024 9
0.03 -0.062 0.061 8
0.004 -0.047 0.088 8
0.012 -0.041 0.087 9
0.031 -0.048 0.083 8
0.028 -0.043 0.075 9
0.05 -0.044 0.069 8
0.078 -0.043 0.05 7
0.084 -0.045 0.02 10
0.071 -0.046 -0.039 8
0.062 -0.042 -0.171 8
0.063 -0.046 -0.328 9
0.056 -0.041 -0.296 8
0.046 -0.058 -0.369 9
0.023 -0.072 -0.338 8
0.001 -0.064 -0.295 8
-0.027 -0.037 -0.201 9
-0.071 0.016 0.0 8
-0.127 0.107 0.169 9
-0.114 0.096 0.152 6
-0.161 0.16 0.262 10
-0.163 0.147 0.349 9
-0.112 0.092 0.353 8
-0.032 0.025 0.275 9
0.064 -0.038 0.207 8
0.114 -0.084 0.19 8
0.102 -0.075 0.171 9
0.081 -0.089 0.182 8
0.026 -0.047 0.193 9
-0.067 0.069 0.223 8
-0.197 0.209 0.223 8
-0.177 0.299 0.155 7
-0.316 0.322 0.078 10
-0.285 0.29 0.07 9
-0.228 0.237 0.016 8
-0.114 0.144 -0.015 8
-0.01 0.044 -0.02 9
0.037 -0.047 0.0 8
0.058 -0.088 0.029 8
0.054 -0.102 0.037 9
0.049 -0.092 0.033 8
0.022 -0.085 0.01 9
-0.014 -0.061 -0.046 8
-0.049 -0.048 -0.16 7
-0.062 -0.03 -0.33 10
-0.026 -0.022 -0.445 8
-0.023 -0.02 -0.401 9
0.029 -0.053 -0.361 8
0.06 -0.095 -0.23 8
0.081 -0.122 -0.071 9
0.104 -0.132 0.014 8
0.136 -0.139 -0.007 9
0.165 -0.148 -0.144 8
0.149 -0.133 -0.13 8
0.12 -0.122 -0.252 9
0.037 -0.081 -0.271 6
-0.054 -0.04 -0.223 11
-0.13 0.002 -0.175 8
-0.181 0.039 -0.115 8
-0.174 0.048 -0.014 9
-0.156 0.043 -0.012 8
-0.125 0.032 0.033 9
0.01 0.014 0.072 8
0.12 -0.021 0.15 8
0.08 -0.053 0.22 9
0.017 -0.038 0.272 8
-0.067 0.016 0.263 8
-0.06 0.015 0.237 7
-0.119 0.071 0.19 10
-0.138 0.077 0.148 9
-0.111 0.042 0.123 8
-0.05 0.003 0.116 8
-0.023 -0.011 0.128 9
-0.058 0.004 0.148 8
-0.052 0.004 0.133 9
-0.101 0.048 0.134 8
-0.11 0.097 0.111 8
-0.113 0.11 0.072 9
-0.059 0.131 0.05 8
-0.016 0.138 0.064 7
-0.037 0.1 0.1 10
-0.033 0.09 0.09 8
-0.001 0.048 0.114 9
0.041 -0.004 0.104 8
0.059 -0.036 0.071 9
0.045 -0.034 0.03 8
0.018 -0.026 0.021 8
-0.028 -0.005 0.006 9
-0.025 -0.004 0.005 8
-0.057 0.037 -0.06 8
-0.046 0.057 -0.117 9
-0.032 0.044 -0.111 7
-0.023 0.042 -0.045 10
-0.003 0.059 0.047 8
0.043 0.062 0.139 8
0.039 0.055 0.125 9
0.093 0.018 0.208 8
0.109 -0.011 0.291 9
0.096 -0.009 0.345 8
0.097 -0.019 0.292 8
0.096 -0.045 0.133 9
0.086 -0.04 0.12 8
0.06 -0.043 -0.048 9
0.011 -0.015 -0.19 6
-0.052 -0.001 -0.277 10
-0.111 -0.015 -0.262 9
# end
#Thu Feb 26 20:18:55 GMT+08:00 20154
