# Supplementary material for: Abnormal Gait Behavior Detection for Elderly Based on Enhanced Wigner-Ville Analysis and Cloud Incremental SVM Learning
Source: Hindawi journal article supplement (doi:10.1155/2016/5869238), 2016-01-01
Supplement: f1 [file 5869238.f1.zip › Supplementary Materials/Original Data/Sitting on a chair then standing/original__13.txt]

# Accelerometer Values
# filename:  original__13.txt
# Saving start time: Thu Feb 26 20:18:58 GMT+08:00 2015

# sensor resolution: 0.0095825195m/s^2
#Sensorvendor: KIONIX, name: KX023 Accelerometer, type: 1,version : 1, range 39.240005

# X value, Y value, Z value, time diff in ms
-0.008 -0.04 0.013 9
-0.001 -0.046 -0.004 8
-0.002 -0.036 -0.073 9
0.0 -0.03 -0.139 8
0.0 -0.029 -0.146 8
-0.004 -0.01 -0.093 9
-0.026 0.015 -0.023 8
-0.024 0.013 -0.021 9
-0.037 0.023 0.027 6
-0.016 0.011 0.042 10
0.009 -0.008 0.041 9
0.016 0.002 0.048 8
0.001 0.031 0.065 9
-0.001 0.017 0.071 8
-0.001 0.015 0.064 8
0.021 -0.03 0.03 9
0.039 -0.05 -0.026 8
0.037 -0.03 -0.062 8
0.026 0.009 -0.044 9
0.023 0.03 0.013 8
0.021 0.027 0.011 7
0.019 0.033 0.049 10
0.009 0.05 0.05 8
0.003 0.066 0.04 9
0.003 0.062 0.034 8
0.012 0.024 0.031 9
0.024 -0.023 0.021 8
0.021 -0.021 0.019 8
0.03 -0.048 0.003 9
0.032 -0.057 -0.018 8
0.029 -0.047 -0.08 9
0.014 -0.033 -0.16 8
-0.018 -0.011 -0.174 7
-0.05 0.026 -0.128 10
-0.045 0.023 -0.115 8
-0.05 0.049 -0.07 9
-0.026 0.04 -0.026 8
0.014 0.004 0.014 8
0.054 -0.033 0.044 9
0.078 -0.054 0.059 8
0.081 -0.044 0.067 8
0.073 -0.04 0.06 9
0.049 -0.007 0.072 8
0.013 0.027 0.075 9
-0.017 0.053 0.064 6
-0.03 0.049 0.025 10
-0.02 0.023 -0.031 9
-0.01 -0.001 -0.066 8
-0.009 -0.001 -0.059 9
-0.005 -0.013 -0.064 8
0.01 -0.023 -0.089 8
0.042 -0.052 -0.11 9
0.069 -0.086 -0.072 8
0.07 -0.094 0.0 9
0.057 -0.076 0.052 8
0.052 -0.068 0.046 8
0.048 -0.056 0.045 7
0.045 -0.057 -0.01 10
0.029 -0.046 -0.087 9
-0.004 -0.019 -0.11 8
-0.039 0.02 -0.058 8
-0.05 0.044 0.024 9
-0.045 0.039 0.022 8
-0.021 0.033 0.089 9
0.021 0.0 0.129 8
0.045 -0.042 0.136 8
0.031 -0.054 0.118 9
0.003 -0.044 0.077 8
0.002 -0.04 0.07 7
-0.005 -0.033 -0.01 10
0.011 -0.039 -0.099 8
0.027 -0.054 -0.113 9
0.026 -0.068 -0.077 8
0.018 -0.077 -0.057 8
0.009 -0.077 -0.079 9
0.009 -0.074 -0.09 8
0.008 -0.067 -0.081 9
0.017 -0.065 -0.053 8
0.026 -0.069 -0.053 8
0.037 -0.093 -0.155 9
0.036 -0.124 -0.326 7
0.021 -0.154 -0.423 10
0.0 -0.157 -0.333 8
0.0 -0.141 -0.3 8
-0.032 -0.111 -0.1 9
-0.064 -0.116 0.029 8
-0.099 -0.165 0.11 9
-0.149 -0.207 0.184 8
-0.166 -0.195 0.204 8
-0.149 -0.175 0.142 9
-0.116 -0.17 0.128 8
-0.069 -0.238 -0.072 8
-0.027 -0.321 -0.381 7
0.012 -0.355 -0.62 10
0.049 -0.367 -0.608 9
0.042 -0.369 -0.389 8
0.037 -0.332 -0.35 8
-0.003 -0.344 -0.079 9
-0.034 -0.393 0.151 8
-0.061 -0.433 0.256 9
-0.094 -0.44 0.186 8
-0.096 -0.436 -0.036 8
-0.048 -0.433 -0.323 9
-0.043 -0.39 -0.291 8
-0.002 -0.384 -0.519 7
0.101 -0.383 -0.616 10
0.198 -0.381 -0.597 8
0.126 -0.36 -0.462 9
-0.025 -0.337 -0.236 8
-0.122 -0.308 0.077 9
-0.11 -0.278 0.069 8
-0.157 -0.267 0.38 8
-0.201 -0.275 0.553 9
-0.2 -0.269 0.587 8
-0.142 -0.274 0.455 8
-0.049 -0.312 0.166 9
-0.044 -0.281 0.149 7
0.04 -0.334 -0.207 10
0.107 -0.369 -0.471 8
0.143 -0.389 -0.56 8
0.113 -0.401 -0.48 9
0.036 -0.396 -0.239 8
-0.032 -0.413 0.043 9
0.002 -0.491 0.225 8
0.002 -0.442 0.202 8
0.117 -0.575 0.211 9
0.166 -0.672 0.032 8
0.157 -0.646 -0.229 9
0.133 -0.507 -0.413 6
0.104 -0.337 -0.492 10
0.083 -0.161 -0.502 9
0.074 -0.145 -0.451 8
0.054 0.026 -0.418 9
0.039 0.161 -0.369 8
0.025 0.256 -0.322 8
0.02 0.338 -0.285 9
0.017 0.425 -0.279 8
0.013 0.537 -0.35 9
0.012 0.484 -0.315 8
0.026 0.665 -0.419 8
0.047 0.884 -0.448 7
0.059 1.032 -0.407 10
0.062 1.081 -0.302 9
0.04 1.125 -0.15 8
0.036 1.012 -0.135 8
0.0 1.091 0.049 9
-0.027 1.163 0.282 8
-0.053 1.247 0.462 8
-0.069 1.3 0.545 9
-0.066 1.329 0.536 8
-0.051 1.403 0.431 9
-0.046 1.263 0.388 8
-0.009 1.331 0.291 7
0.048 1.324 0.252 10
0.109 1.29 0.253 8
0.178 1.26 0.338 9
0.205 1.212 0.507 8
0.142 1.173 0.663 8
0.127 1.056 0.597 9
0.014 1.05 0.741 8
-0.097 1.037 0.88 9
-0.169 1.066 0.896 8
-0.189 1.069 0.741 8
-0.143 0.971 0.521 9
-0.129 0.874 0.469 6
-0.072 0.774 0.29 11
-0.073 0.668 0.2 8
-0.069 0.559 0.33 8
-0.123 0.461 0.632 9
-0.255 0.371 0.895 8
-0.304 0.305 1.106 8
-0.289 0.234 1.224 9
-0.26 0.211 1.102 8
-0.193 0.114 1.03 9
-0.059 -0.03 0.813 8
0.094 -0.222 0.585 8
0.234 -0.429 0.349 7
0.344 -0.594 0.026 10
0.37 -0.663 -0.284 9
0.333 -0.597 -0.255 8
0.249 -0.598 -0.496 8
0.11 -0.541 -0.714 9
-0.018 -0.419 -0.893 8
-0.149 -0.284 -1.038 9
-0.181 -0.148 -1.011 8
-0.192 -0.006 -0.801 8
-0.173 -0.005 -0.721 9
-0.253 0.123 -0.553 8
-0.272 0.244 -0.491 7
-0.262 0.352 -0.576 10
-0.25 0.429 -0.736 8
-0.225 0.461 -0.862 9
-0.173 0.464 -0.919 8
-0.156 0.417 -0.827 8
-0.095 0.408 -0.8 9
-0.031 0.381 -0.688 8
0.061 0.344 -0.395 9
0.127 0.302 0.094 8
0.098 0.26 0.521 8
-0.012 0.228 0.788 9
-0.011 0.205 0.71 7
-0.16 0.157 0.837 10
-0.27 0.025 0.747 8
-0.298 -0.2 0.479 8
-0.236 -0.458 0.091 9
-0.121 -0.647 -0.345 8
-0.004 -0.8 -0.692 9
-0.004 -0.72 -0.623 8
0.084 -0.87 -0.92 8
0.123 -0.945 -1.083 9
0.088 -0.992 -0.996 8
-0.026 -1.023 -0.774 9
-0.024 -0.921 -0.697 6
-0.181 -0.943 -0.536 10
-0.3 -0.958 -0.482 9
-0.392 -0.995 -0.594 8
-0.292 -1.134 -0.702 9
-0.088 -1.265 -0.813 8
-0.023 -1.294 -0.905 8
0.056 -1.296 -0.809 9
0.05 -1.167 -0.728 8
0.127 -1.12 -0.544 8
0.175 -1.004 -0.351 9
0.266 -0.855 -0.147 8
0.334 -0.679 0.074 7
0.302 -0.423 0.319 10
0.199 -0.155 0.582 8
0.179 -0.139 0.524 9
0.059 0.032 0.702 8
-0.039 0.149 0.708 9
-0.056 0.289 0.525 8
0.042 0.444 0.265 8
0.187 0.561 0.085 9
0.28 0.689 0.006 8
0.252 0.62 0.005 9
0.243 0.731 0.065 8
0.136 0.814 0.311 7
0.013 0.92 0.626 10
-0.086 1.011 0.841 8
-0.162 1.048 0.916 9
-0.193 1.017 0.888 8
-0.174 0.915 0.799 8
-0.139 0.835 0.722 9
-0.042 0.682 0.586 8
0.081 0.477 0.456 8
0.184 0.273 0.43 9
0.216 0.133 0.478 8
0.178 0.06 0.54 9
0.16 0.054 0.486 6
0.097 0.017 0.51 10
0.008 -0.002 0.448 9
-0.093 -0.01 0.307 8
-0.169 -0.015 0.082 9
-0.165 -0.029 -0.164 8
-0.082 -0.073 -0.324 8
-0.074 -0.065 -0.291 9
0.025 -0.137 -0.332 8
0.095 -0.222 -0.298 9
0.126 -0.286 -0.275 8
0.123 -0.323 -0.306 8
0.081 -0.35 -0.412 7
0.023 -0.361 -0.543 10
0.021 -0.325 -0.489 9
-0.032 -0.338 -0.562 8
-0.074 -0.35 -0.572 8
-0.096 -0.339 -0.54 9
-0.1 -0.311 -0.484 8
-0.07 -0.31 -0.431 9
0.003 -0.344 -0.389 8
0.003 -0.309 -0.35 8
0.083 -0.356 -0.314 9
0.144 -0.385 -0.283 8
0.164 -0.376 -0.262 7
0.161 -0.347 -0.243 10
0.144 -0.308 -0.222 8
0.093 -0.233 -0.201 9
0.084 -0.209 -0.18 8
0.019 -0.106 -0.162 8
-0.03 -0.002 -0.142 9
-0.062 0.078 -0.118 8
-0.052 0.127 -0.068 9
-0.007 0.137 0.028 8
-0.006 0.123 0.025 8
0.038 0.099 0.153 9
0.076 0.06 0.265 7
0.091 0.039 0.328 10
0.082 0.033 0.298 8
0.065 0.025 0.146 8
0.029 0.04 -0.028 9
0.026 0.036 -0.025 8
-0.028 0.071 -0.116 9
-0.091 0.1 -0.126 8
-0.144 0.113 -0.094 8
-0.173 0.128 -0.077 9
-0.15 0.131 -0.089 8
-0.097 0.118 -0.081 9
-0.088 0.106 -0.073 6
-0.039 0.079 -0.003 10
-0.004 0.06 0.092 9
0.021 0.069 0.125 8
0.037 0.088 0.109 8
0.019 0.124 0.124 9
-0.033 0.143 0.17 8
-0.029 0.129 0.153 9
-0.1 0.101 0.157 8
-0.169 0.048 0.116 8
-0.221 0.005 0.089 9
-0.243 -0.032 0.049 8
-0.235 -0.071 -0.035 7
-0.168 -0.093 -0.12 10
-0.152 -0.083 -0.108 8
-0.049 -0.07 -0.144 9
0.007 -0.018 -0.119 8
0.017 0.03 -0.017 9
-0.017 0.044 0.108 8
-0.082 0.02 0.187 8
-0.136 -0.023 0.179 9
-0.122 -0.021 0.161 8
-0.143 -0.066 0.057 9
-0.115 -0.124 -0.076 8
-0.046 -0.2 -0.169 7
0.018 -0.254 -0.202 10
0.049 -0.251 -0.201 8
0.057 -0.2 -0.177 9
0.052 -0.18 -0.159 8
0.056 -0.118 -0.146 8
0.064 -0.06 -0.155 9
0.075 -0.018 -0.164 8
0.088 -0.01 -0.157 8
0.086 -0.015 -0.123 9
0.067 -0.004 -0.036 8
0.061 -0.004 -0.032 9
0.062 0.017 0.074 6
0.073 0.059 0.16 10
0.069 0.137 0.228 9
0.034 0.234 0.266 8
-0.025 0.337 0.298 9
-0.093 0.409 0.323 8
-0.084 0.368 0.29 8
-0.128 0.393 0.304 9
-0.125 0.405 0.387 8
-0.101 0.443 0.569 9
-0.088 0.5 0.719 8
-0.062 0.555 0.766 8
-0.056 0.5 0.689 7
-0.017 0.567 0.684 10
0.0 0.678 0.654 9
0.006 0.824 0.743 8
0.017 0.911 0.95 8
0.025 0.922 1.078 9
0.0 0.903 1.148 8
0.0 0.813 1.033 9
-0.048 0.809 1.219 8
-0.119 0.851 1.463 8
-0.208 0.903 1.616 9
-0.25 0.903 1.629 8
-0.199 0.825 1.511 7
-0.093 0.721 1.35 10
-0.083 0.649 1.215 8
0.0 0.569 1.082 9
0.038 0.471 0.967 8
0.027 0.404 0.869 8
-0.054 0.355 0.784 9
-0.164 0.3 0.712 8
-0.243 0.248 0.658 9
-0.219 0.223 0.592 8
-0.21 0.163 0.534 8
-0.109 0.089 0.446 9
0.023 -0.002 0.283 6
0.146 -0.063 0.064 11
0.215 -0.094 -0.096 8
0.238 -0.134 -0.174 8
0.215 -0.121 -0.157 9
0.234 -0.209 -0.165 8
0.221 -0.358 -0.156 9
0.152 -0.521 -0.252 8
0.042 -0.66 -0.408 8
-0.069 -0.759 -0.508 9
-0.154 -0.799 -0.539 8
-0.138 -0.719 -0.485 8
-0.192 -0.723 -0.464 7
-0.211 -0.718 -0.423 10
-0.174 -0.757 -0.406 9
-0.093 -0.883 -0.469 8
0.012 -1.047 -0.592 8
0.14 -1.146 -0.674 9
0.126 -1.031 -0.607 8
0.224 -1.099 -0.601 9
0.237 -1.218 -0.569 8
0.178 -1.346 -0.608 8
0.075 -1.419 -0.688 9
-0.045 -1.451 -0.746 8
-0.04 -1.306 -0.672 7
-0.182 -1.323 -0.757 10
-0.332 -1.336 -0.895 8
-0.434 -1.39 -1.005 9
-0.458 -1.53 -1.058 8
-0.412 -1.686 -1.082 9
-0.286 -1.738 -1.054 8
-0.098 -1.684 -0.926 8
-0.088 -1.515 -0.834 9
0.106 -1.419 -0.568 8
0.248 -1.302 -0.27 8
0.314 -1.18 -0.075 9
0.323 -1.057 0.005 7
0.317 -0.947 0.035 10
0.311 -0.841 0.095 8
0.28 -0.757 0.085 8
0.29 -0.659 0.237 9
0.386 -0.583 0.512 8
0.515 -0.506 0.781 9
0.555 -0.364 0.907 8
0.559 -0.261 0.862 8
0.503 -0.235 0.585 9
0.56 -0.211 0.526 8
0.638 -0.324 0.136 9
0.669 -0.341 -0.131 6
0.573 -0.211 -0.259 10
0.395 0.077 -0.335 9
0.282 0.344 -0.389 8
0.254 0.309 -0.35 9
0.254 0.46 -0.393 8
0.301 0.503 -0.422 8
0.321 0.464 -0.443 9
0.26 0.412 -0.497 8
0.145 0.384 -0.545 9
0.051 0.349 -0.571 8
0.046 0.314 -0.514 8
0.046 0.233 -0.487 7
0.01 0.156 -0.415 10
-0.095 0.195 -0.231 8
-0.185 0.305 0.089 9
-0.337 0.399 0.298 8
-0.444 0.467 0.341 9
-0.4 0.42 0.307 8
-0.364 0.436 0.299 8
-0.289 0.398 0.263 9
-0.201 0.326 0.187 8
-0.053 0.259 0.079 9
0.011 0.23 -0.094 8
0.01 0.207 -0.085 7
0.017 0.212 -0.259 10
0.058 0.233 -0.385 8
0.121 0.253 -0.492 9
0.175 0.279 -0.547 8
0.157 0.319 -0.547 8
0.093 0.375 -0.479 9
-0.025 0.489 -0.344 8
-0.023 0.44 -0.309 9
-0.148 0.62 -0.117 8
-0.216 0.737 0.101 8
-0.246 0.755 0.251 9
-0.235 0.727 0.306 6
-0.18 0.674 0.32 11
-0.126 0.608 0.338 8
-0.113 0.547 0.304 8
-0.094 0.497 0.33 9
-0.08 0.457 0.338 8
-0.058 0.406 0.316 8
-0.032 0.356 0.279 9
-0.056 0.33 0.224 8
-0.12 0.342 0.077 9
-0.108 0.307 0.07 8
-0.18 0.332 -0.158 8
-0.27 0.322 -0.33 7
-0.32 0.287 -0.359 10
-0.321 0.255 -0.292 9
-0.299 0.251 -0.183 8
-0.263 0.262 -0.117 8
-0.236 0.236 -0.106 9
-0.169 0.22 -0.125 8
-0.069 0.189 -0.188 9
0.021 0.194 -0.239 8
0.071 0.228 -0.17 8
0.084 0.27 0.037 9
0.081 0.299 0.229 8
0.073 0.269 0.206 7
0.07 0.279 0.305 10
0.091 0.251 0.323 8
0.149 0.172 0.286 9
0.206 0.073 0.234 8
0.229 -0.01 0.19 8
0.209 -0.056 0.152 9
0.188 -0.051 0.136 8
0.15 -0.063 0.079 9
0.121 -0.066 0.0 8
0.095 -0.074 -0.081 8
0.072 -0.086 -0.171 9
0.064 -0.077 -0.154 7
0.05 -0.082 -0.321 10
0.038 -0.074 -0.289 8
0.022 -0.048 -0.302 8
0.015 -0.037 -0.271 9
0.011 -0.038 -0.224 8
0.003 -0.038 -0.182 9
0.001 -0.026 -0.179 8
0.0 -0.024 -0.161 8
0.001 -0.001 -0.203 9
0.02 0.014 -0.253 8
0.052 0.009 -0.241 9
0.073 0.006 -0.121 6
0.073 0.028 0.072 10
0.058 0.068 0.235 9
0.052 0.061 0.211 8
0.034 0.099 0.26 9
0.021 0.11 0.217 8
0.014 0.083 0.133 8
0.014 0.034 0.047 9
0.049 -0.024 0.009 8
0.108 -0.094 0.081 8
0.097 -0.085 0.073 9
0.105 -0.119 0.166 8
0.051 -0.039 0.142 7
-0.031 0.108 0.035 10
-0.106 0.23 -0.1 8
-0.149 0.284 -0.199 9
-0.133 0.268 -0.215 8
-0.119 0.241 -0.193 9
-0.067 0.182 -0.139 8
-0.026 0.141 -0.047 8
-0.011 0.147 0.038 9
-0.011 0.163 0.077 8
-0.015 0.156 0.039 9
-0.008 0.118 -0.062 8
-0.007 0.106 -0.056 7
0.007 0.059 -0.172 10
0.023 0.012 -0.333 8
0.068 -0.077 -0.416 9
0.125 -0.183 -0.308 8
0.127 -0.21 -0.181 8
0.061 -0.125 -0.064 9
0.055 -0.113 -0.057 8
-0.027 0.037 0.125 9
-0.094 0.119 0.246 8
-0.085 0.098 0.19 8
0.035 0.012 0.098 9
0.153 -0.1 0.065 6
0.21 -0.16 0.045 10
0.189 -0.144 0.04 9
0.19 -0.151 -0.013 8
0.134 -0.13 -0.081 9
0.068 -0.101 -0.146 8
0.005 -0.07 -0.245 8
-0.038 -0.033 -0.328 9
-0.058 -0.008 -0.304 8
-0.052 -0.007 -0.273 9
-0.067 0.004 -0.107 8
-0.087 0.034 0.113 8
-0.097 0.076 0.227 7
-0.076 0.074 0.187 10
-0.02 0.03 0.075 9
0.045 -0.017 -0.017 8
0.04 -0.016 -0.016 8
0.078 -0.015 -0.068 9
0.078 0.023 -0.086 8
0.056 0.043 -0.087 9
0.03 0.041 -0.07 8
0.007 0.049 -0.022 8
0.007 0.044 0.069 9
-0.02 0.084 0.062 8
-0.063 0.143 0.159 7
-0.095 0.171 0.232 10
-0.088 0.133 0.262 8
-0.06 0.063 0.238 9
-0.031 0.0 0.16 8
-0.028 0.0 0.144 8
-0.018 -0.046 0.054 9
-0.023 -0.07 -0.028 8
-0.03 -0.076 -0.12 9
-0.035 -0.059 -0.225 8
-0.027 -0.036 -0.34 8
-0.013 -0.031 -0.407 9
-0.011 -0.028 -0.366 7
-0.006 -0.042 -0.312 10
-0.019 -0.047 -0.151 8
-0.065 0.0 0.016 8
-0.115 0.07 0.13 9
-0.124 0.1 0.185 8
-0.086 0.084 0.16 9
-0.077 0.076 0.144 8
-0.026 0.027 0.058 8
0.014 -0.025 -0.042 9
0.041 -0.052 -0.119 8
0.059 -0.059 -0.158 9
0.063 -0.072 -0.162 6
0.046 -0.086 -0.127 10
0.041 -0.077 -0.115 9
0.024 -0.063 -0.08 8
0.019 -0.04 -0.08 8
0.007 0.005 -0.105 9
-0.019 0.071 -0.08 8
-0.048 0.114 0.051 9
-0.078 0.162 0.215 8
-0.07 0.146 0.194 8
-0.081 0.183 0.269 9
-0.06 0.174 0.242 8
-0.012 0.099 0.176 7
0.05 -0.025 0.129 10
0.086 -0.132 0.14 8
0.077 -0.191 0.171 9
0.069 -0.172 0.154 8
0.043 -0.188 0.176 9
0.013 -0.172 0.173 8
-0.022 -0.115 0.118 8
-0.051 -0.055 0.009 9
-0.076 -0.009 -0.084 8
-0.076 0.07 -0.108 9
-0.068 0.063 -0.097 8
-0.039 0.106 -0.041 7
-0.006 0.075 0.086 10
-0.002 0.042 0.22 8
-0.026 0.05 0.314 9
-0.037 0.076 0.351 8
-0.024 0.082 0.296 8
-0.022 0.073 0.266 9
-0.007 0.041 0.128 8
0.007 -0.002 -0.012 8
0.006 -0.021 -0.096 9
-0.014 -0.008 -0.139 8
-0.039 0.002 -0.138 9
-0.035 0.001 -0.124 6
-0.058 -0.014 -0.07 10
-0.068 -0.016 -0.021 9
-0.059 -0.008 0.004 8
-0.034 -0.023 0.026 9
-0.001 -0.051 0.029 8
0.018 -0.084 0.011 8
0.02 -0.106 -0.031 9
0.018 -0.095 -0.028 8
0.004 -0.09 -0.107 9
-0.012 -0.064 -0.162 8
-0.034 -0.014 -0.163 8
-0.064 0.034 -0.129 7
-0.081 0.072 -0.041 10
-0.073 0.065 -0.037 9
-0.062 0.076 0.078 8
-0.024 0.055 0.149 8
0.029 0.016 0.164 9
0.078 -0.015 0.166 8
0.097 -0.022 0.19 8
0.088 -0.014 0.222 9
0.08 -0.013 0.199 8
0.067 -0.01 0.199 9
0.05 -0.016 0.152 8
0.023 -0.002 0.073 7
-0.002 0.024 0.012 10
-0.031 0.041 -0.016 8
-0.062 0.045 -0.051 9
-0.056 0.041 -0.046 8
-0.071 0.051 -0.082 8
-0.069 0.048 -0.104 9
-0.048 0.036 -0.124 8
-0.016 0.031 -0.118 9
0.003 0.026 -0.061 8
0.016 0.006 0.02 8
0.015 0.006 0.018 9
0.025 -0.023 0.093 6
0.02 -0.048 0.141 11
0.012 -0.072 0.159 8
0.006 -0.088 0.153 8
-0.003 -0.084 0.125 9
-0.004 -0.075 0.07 8
-0.003 -0.068 0.063 8
0.004 -0.073 -0.036 9
0.009 -0.067 -0.144 8
0.008 -0.034 -0.22 9
0.0 0.005 -0.241 8
-0.004 0.023 -0.186 8
-0.004 0.021 -0.167 7
-0.004 0.034 -0.06 10
-0.009 0.048 0.016 9
-0.015 0.058 0.048 8
-0.001 0.042 0.073 8
0.025 -0.003 0.099 9
0.047 -0.062 0.116 8
0.05 -0.118 0.067 9
0.045 -0.106 0.06 8
0.039 -0.141 0.007 8
0.02 -0.132 -0.047 9
-0.009 -0.08 -0.156 8
0.0 -0.058 -0.256 7
0.046 -0.091 -0.286 10
0.062 -0.109 -0.192 8
0.056 -0.098 -0.173 9
0.035 -0.021 0.019 8
0.04 0.092 0.199 8
0.079 0.124 0.313 9
0.111 0.119 0.366 8
0.142 0.125 0.361 9
0.162 0.09 0.313 8
0.146 0.081 0.282 9
0.111 0.031 0.165 8
0.037 0.027 -0.029 7
-0.031 0.052 -0.229 10
# end
#Thu Feb 26 20:19:03 GMT+08:00 2015 
