# Supplementary material for: Abnormal Gait Behavior Detection for Elderly Based on Enhanced Wigner-Ville Analysis and Cloud Incremental SVM Learning
Source: Hindawi journal article supplement (doi:10.1155/2016/5869238), 2016-01-01
Supplement: f1 [file 5869238.f1.zip › Supplementary Materials/Original Data/Sitting on a chair then standing/original__14.txt]

# Accelerometer Values
# filename:  original__14.txt
# Saving start time: Thu Feb 26 20:19:13 GMT+08:00 2015

# sensor resolution: 0.0095825195m/s^2
#Sensorvendor: KIONIX, name: KX023 Accelerometer, type: 1,version : 1, range 39.240005

# X value, Y value, Z value, time diff in ms
0.045 -0.079 0.113 8
0.04 -0.071 0.102 9
0.04 -0.099 0.135 8
0.035 -0.103 0.118 9
0.048 -0.096 0.081 8
0.046 -0.092 0.054 8
0.023 -0.084 0.022 7
0.009 -0.068 -0.015 10
0.008 -0.061 -0.014 9
0.003 -0.055 -0.043 8
-0.012 -0.052 -0.038 8
-0.048 -0.023 -0.018 9
-0.065 0.011 -0.016 8
-0.028 0.009 -0.029 9
0.032 -0.011 -0.032 8
0.029 -0.01 -0.029 8
0.054 -0.018 -0.016 9
0.024 0.022 -0.002 8
-0.003 0.074 0.007 7
0.015 0.053 0.012 10
0.058 -0.005 0.004 8
0.054 -0.043 -0.007 9
0.049 -0.039 -0.006 8
0.008 -0.048 -0.015 8
-0.007 -0.047 -0.019 9
-0.001 -0.058 -0.031 8
-0.019 -0.05 -0.047 9
-0.07 0.002 -0.055 8
-0.096 0.051 -0.073 8
-0.086 0.046 -0.065 9
-0.079 0.039 -0.092 7
-0.064 0.013 -0.098 10
-0.061 0.0 -0.078 8
-0.057 0.008 -0.046 8
-0.043 0.014 -0.008 9
-0.035 0.004 0.024 8
-0.032 0.003 0.022 9
-0.021 -0.004 0.037 8
-0.003 -0.005 0.036 8
0.019 -0.012 0.025 9
0.042 -0.029 0.01 8
0.046 -0.036 -0.014 9
0.042 -0.032 -0.013 6
0.02 -0.013 -0.037 10
-0.006 0.008 -0.059 9
-0.019 0.019 -0.09 8
-0.017 0.022 -0.127 9
-0.016 0.006 -0.117 8
-0.034 0.0 -0.07 8
-0.031 0.0 -0.063 9
-0.047 0.011 -0.049 8
-0.045 0.008 -0.039 8
-0.029 -0.003 -0.011 9
-0.01 -0.01 0.018 8
0.005 -0.013 0.047 7
0.017 -0.016 0.064 10
0.015 -0.014 0.058 8
0.015 -0.032 0.062 9
0.014 -0.06 0.051 8
0.016 -0.069 0.009 9
0.025 -0.065 -0.065 8
0.038 -0.049 -0.19 8
0.047 -0.021 -0.37 9
0.043 -0.019 -0.333 8
0.039 0.0 -0.525 9
0.0 0.034 -0.596 8
-0.069 0.071 -0.514 7
-0.129 0.081 -0.328 10
-0.147 0.056 -0.086 8
-0.128 0.012 0.105 9
-0.115 0.011 0.094 8
-0.117 -0.015 0.208 8
-0.158 -0.02 0.272 9
-0.18 -0.022 0.304 8
-0.126 -0.069 0.311 8
-0.013 -0.15 0.262 9
0.114 -0.21 0.103 8
0.103 -0.189 0.093 9
0.2 -0.274 -0.131 6
0.236 -0.338 -0.355 10
0.217 -0.272 -0.476 9
0.167 -0.164 -0.442 8
0.163 -0.096 -0.28 9
0.207 -0.061 -0.038 8
0.186 -0.055 -0.034 8
0.229 -0.068 0.15 9
0.231 -0.118 0.184 8
0.156 -0.123 0.012 9
0.02 -0.077 -0.29 8
-0.103 -0.029 -0.544 8
-0.093 -0.026 -0.489 7
-0.175 0.007 -0.606 10
-0.245 0.022 -0.637 9
-0.288 0.03 -0.631 8
-0.299 0.026 -0.583 8
-0.298 -0.025 -0.515 9
-0.247 -0.154 -0.457 8
-0.152 -0.319 -0.413 8
-0.137 -0.287 -0.372 9
-0.036 -0.427 -0.34 8
0.081 -0.513 -0.328 9
0.193 -0.534 -0.369 8
0.24 -0.491 -0.416 7
0.16 -0.254 -0.382 10
0.143 -0.167 -0.138 8
0.128 -0.151 -0.124 9
0.245 -0.282 0.078 8
0.323 -0.323 0.139 8
0.341 -0.323 0.343 9
0.319 -0.26 0.661 8
0.276 -0.18 1.007 9
0.254 -0.126 1.311 8
0.228 -0.113 1.18 8
0.266 -0.083 1.346 9
0.352 -0.044 1.35 7
0.442 -0.013 1.281 10
0.468 -0.014 1.183 8
0.396 -0.012 1.076 8
0.225 0.018 0.956 9
0.202 0.016 0.86 8
0.015 0.041 0.67 9
-0.124 0.047 0.412 8
-0.217 0.051 0.192 8
-0.288 0.058 0.027 9
-0.336 0.034 -0.118 8
-0.327 0.066 -0.264 9
-0.294 0.06 -0.238 6
-0.287 0.141 -0.361 10
-0.348 0.228 -0.369 9
-0.472 0.32 -0.271 8
-0.656 0.356 -0.179 8
-0.861 0.368 -0.199 9
-0.988 0.394 -0.4 8
-0.889 0.354 -0.36 9
-0.912 0.381 -0.664 8
-0.88 0.364 -0.887 8
-0.803 0.24 -0.882 9
-0.681 -0.002 -0.577 8
-0.612 -0.002 -0.095 7
-0.503 -0.415 0.397 10
-0.452 -0.374 0.357 8
-0.395 -0.532 0.73 9
-0.418 -0.628 0.884 8
-0.277 -0.745 0.914 9
-0.136 -0.834 0.841 8
-0.206 -0.799 0.747 8
-0.246 -0.68 0.832 9
-0.222 -0.612 0.749 8
-0.276 -0.424 1.042 8
-0.345 -0.257 1.369 9
-0.382 -0.204 1.562 7
-0.325 -0.239 1.485 10
-0.209 -0.28 1.145 8
-0.092 -0.283 0.638 8
-0.083 -0.255 0.574 9
0.163 -0.226 0.1 8
0.444 -0.138 -0.347 9
0.549 0.034 -0.741 8
0.528 0.268 -0.866 8
0.406 0.532 -0.723 9
0.255 0.735 -0.431 8
0.23 0.662 -0.388 9
0.15 0.808 -0.158 6
0.17 0.914 -0.021 10
0.261 0.967 0.025 9
0.383 0.94 -0.12 8
0.504 0.86 -0.344 9
0.579 0.861 -0.469 8
0.521 0.775 -0.422 8
0.494 0.866 -0.39 9
0.369 0.986 -0.202 8
0.221 1.137 0.044 9
0.129 1.22 0.31 8
0.117 1.197 0.637 8
0.105 1.077 0.574 7
0.151 1.005 0.88 10
0.234 0.87 0.993 8
0.352 0.688 0.821 9
0.531 0.527 0.436 8
0.758 0.377 0.066 9
0.916 0.232 -0.146 8
0.825 0.15 -0.237 8
0.742 0.135 -0.214 9
0.801 0.187 -0.251 8
0.807 0.299 -0.218 9
0.963 0.271 -0.147 8
1.043 0.233 -0.111 7
0.968 0.226 -0.032 10
0.871 0.187 0.155 8
0.784 0.168 0.139 9
0.458 0.154 0.332 8
0.316 0.131 0.428 8
0.245 0.125 0.377 9
0.176 0.117 0.208 8
0.024 0.093 0.11 9
0.022 0.084 0.124 8
-0.278 0.075 0.111 8
-0.629 0.225 0.152 9
-0.816 0.33 0.148 6
-0.869 0.396 0.169 11
-0.91 0.502 0.429 8
-0.971 0.584 0.869 8
-0.874 0.517 1.078 9
-0.996 0.465 0.97 8
-1.032 0.252 0.744 8
-0.956 0.03 0.247 9
-0.866 -0.156 -0.209 8
-0.825 -0.283 -0.535 9
-0.78 -0.334 -0.743 8
-0.702 -0.365 -0.79 8
-0.537 -0.329 -0.711 7
-0.241 -0.339 -0.688 10
0.067 -0.334 -0.693 9
0.259 -0.312 -0.777 8
0.323 -0.279 -0.833 8
0.31 -0.24 -0.637 9
0.279 -0.216 -0.573 8
0.199 -0.186 -0.516 9
0.039 -0.159 0.47 8
-0.061 -0.117 0.841 8
-0.041 -0.129 0.898 9
0.081 -0.259 0.574 8
0.073 -0.233 0.517 7
0.263 -0.441 -0.577 10
0.392 -0.397 -0.519 8
0.421 -0.702 -0.837 9
0.387 -0.654 -0.923 8
0.278 -0.563 -0.854 8
0.107 -0.443 -0.604 9
-0.081 -0.259 -0.257 8
-0.073 -0.233 -0.231 9
-0.223 -0.053 -0.208 8
-0.265 0.016 0.141 8
-0.191 -0.083 0.131 9
-0.005 -0.324 -0.018 7
0.084 -0.473 -0.343 10
0.103 -0.498 -0.656 8
0.092 -0.448 -0.59 8
0.21 -0.499 -0.531 9
0.307 -0.556 -0.792 8
0.308 -0.59 -0.7 9
0.235 -0.533 -0.53 8
0.11 -0.398 -0.348 8
-0.014 -0.285 -0.178 9
-0.012 -0.256 -0.16 8
-0.066 -0.212 -0.144 9
-0.065 -0.223 0.154 6
-0.038 -0.248 0.22 10
0.003 -0.28 0.275 9
0.044 -0.355 0.28 8
0.075 -0.428 0.197 9
0.068 -0.385 0.178 8
0.061 -0.362 0.005 8
0.014 -0.254 -0.161 9
-0.033 -0.114 -0.361 8
-0.073 0.019 -0.557 8
-0.104 0.081 -0.591 9
-0.109 0.095 -0.456 8
-0.098 0.085 -0.41 7
-0.08 0.092 -0.242 10
-0.076 0.113 -0.139 8
-0.091 0.132 -0.059 9
-0.101 0.129 0.011 8
-0.091 0.111 0.064 9
-0.068 0.076 0.09 8
-0.061 0.068 0.081 8
-0.042 0.041 0.105 9
-0.018 0.03 0.132 8
-0.011 0.039 0.159 9
-0.038 0.066 0.211 8
-0.068 0.1 0.291 7
-0.092 0.133 0.376 10
-0.082 0.119 0.338 8
-0.102 0.127 0.419 9
-0.087 0.095 0.477 8
-0.053 0.046 0.518 8
-0.049 0.006 0.527 9
-0.086 -0.014 0.479 8
-0.143 -0.015 0.331 9
-0.129 -0.013 0.297 8
-0.186 -0.006 0.06 8
-0.219 0.007 -0.186 9
-0.201 0.038 -0.378 6
-0.128 0.053 -0.53 10
-0.021 0.03 -0.576 9
0.087 -0.014 -0.499 8
0.078 -0.013 -0.449 9
0.161 -0.053 -0.356 8
0.205 -0.076 -0.276 8
0.202 -0.08 -0.22 9
0.155 -0.065 -0.184 8
0.09 -0.041 -0.169 9
0.04 -0.016 -0.181 8
0.036 -0.015 -0.163 8
0.016 0.003 -0.189 7
0.016 0.016 -0.192 10
0.03 0.04 -0.172 9
0.047 0.057 -0.126 8
0.067 0.057 -0.064 8
0.084 0.078 -0.022 9
0.076 0.07 -0.02 8
0.08 0.096 -0.008 9
0.085 0.099 -0.014 8
0.08 0.106 -0.008 8
0.051 0.127 0.012 9
0.021 0.138 0.014 8
0.019 0.124 0.013 7
0.011 0.117 -0.016 10
0.009 0.098 -0.035 8
-0.005 0.075 -0.012 9
-0.026 0.08 0.066 8
-0.032 0.111 0.201 8
-0.02 0.118 0.302 9
0.006 0.059 0.28 8
0.005 0.053 0.252 9
0.038 -0.034 0.135 8
0.049 -0.089 0.006 8
0.033 -0.126 -0.086 9
0.006 -0.145 -0.161 7
-0.01 -0.125 -0.27 10
-0.006 -0.101 -0.337 8
-0.005 -0.091 -0.304 8
0.007 -0.09 -0.239 9
0.017 -0.085 -0.124 8
0.023 -0.079 -0.05 9
0.031 -0.086 -0.027 8
0.054 -0.095 -0.026 8
0.089 -0.094 0.0 9
0.08 -0.084 0.0 8
0.104 -0.082 0.095 9
0.093 -0.082 0.229 6
0.06 -0.083 0.306 10
0.033 -0.091 0.273 9
0.016 -0.102 0.159 8
-0.001 -0.094 0.045 8
-0.001 -0.085 0.04 9
-0.013 -0.056 -0.036 8
-0.011 -0.041 -0.086 9
0.003 -0.051 -0.086 8
0.017 -0.065 -0.028 8
0.007 -0.066 0.031 9
-0.005 -0.061 0.007 8
-0.004 -0.055 0.006 7
-0.002 -0.061 -0.108 10
0.01 -0.114 -0.232 8
0.021 -0.192 -0.29 9
0.022 -0.205 -0.259 8
0.0 -0.125 -0.125 9
-0.048 -0.013 0.121 8
-0.043 -0.011 0.109 8
-0.081 0.062 0.389 9
-0.081 0.08 0.564 8
-0.049 0.057 0.562 9
0.026 0.031 0.41 8
0.103 0.029 0.25 7
0.131 0.047 0.216 10
0.118 0.042 0.194 8
0.103 0.064 0.284 9
0.056 0.097 0.422 8
0.005 0.172 0.53 8
-0.035 0.236 0.612 9
-0.04 0.278 0.708 8
-0.019 0.349 0.84 8
-0.017 0.314 0.756 9
-0.013 0.378 0.883 8
-0.027 0.452 0.901 9
-0.038 0.542 0.881 6
-0.061 0.566 0.918 10
-0.081 0.541 0.946 9
-0.084 0.506 0.939 8
-0.075 0.455 0.845 9
-0.084 0.416 0.903 8
-0.113 0.389 1.035 8
-0.145 0.375 1.178 9
-0.157 0.363 1.323 8
-0.186 0.352 1.456 9
-0.228 0.338 1.531 8
-0.205 0.304 1.378 8
-0.208 0.286 1.355 7
-0.129 0.254 1.219 10
-0.011 0.226 1.089 9
0.075 0.201 1.081 8
0.123 0.18 1.202 8
0.128 0.167 1.34 9
0.115 0.151 1.206 8
0.088 0.144 1.315 8
0.045 0.148 1.412 9
0.019 0.174 1.441 8
0.031 0.216 1.376 9
0.043 0.269 1.231 8
0.038 0.242 1.108 7
0.049 0.313 0.867 10
0.079 0.375 0.548 8
0.112 0.425 0.211 9
0.122 0.491 -0.062 8
0.109 0.555 -0.253 8
0.078 0.591 -0.381 9
0.038 0.608 -0.44 8
0.034 0.547 -0.396 9
-0.011 0.556 -0.422 8
-0.043 0.522 -0.425 8
-0.034 0.393 -0.391 9
0.012 0.161 -0.347 7
0.08 -0.107 -0.363 10
0.124 -0.308 -0.48 8
0.111 -0.277 -0.432 8
0.104 -0.384 -0.608 9
0.055 -0.468 -0.773 8
-0.03 -0.58 -0.903 9
-0.145 -0.725 -0.997 8
-0.253 -0.882 -1.053 8
-0.295 -1.036 -1.166 9
-0.266 -0.933 -1.049 8
-0.204 -1.139 -1.284 8
-0.076 -1.33 -1.429 7
0.019 -1.426 -1.247 10
0.033 -1.437 -0.864 9
-0.007 -1.369 -0.56 8
-0.03 -1.296 -0.388 8
-0.027 -1.166 -0.35 9
-0.004 -1.133 -0.312 8
0.016 -1.084 -0.438 9
0.001 -1.034 -0.597 8
-0.004 -1.063 -0.706 8
0.019 -1.174 -0.819 9
0.062 -1.325 -0.908 8
0.056 -1.192 -0.817 7
0.191 -1.35 -0.974 10
0.411 -1.454 -1.225 8
0.614 -1.481 -1.356 9
0.649 -1.497 -1.252 8
0.531 -1.538 -0.917 9
0.324 -1.477 -0.48 8
0.292 -1.329 -0.432 8
-0.05 -1.152 -0.043 9
-0.519 -0.99 0.294 8
-0.886 -0.866 0.486 8
-1.005 -0.785 0.348 9
-0.867 -0.741 0.034 7
-0.446 -0.659 -0.343 10
-0.402 -0.593 -0.309 8
0.081 -0.533 -0.872 8
0.497 -0.495 -1.41 9
0.76 -0.436 -1.595 8
0.786 -0.361 -1.35 9
0.639 -0.226 -0.895 8
0.45 -0.026 -0.374 8
0.405 -0.023 -0.337 9
0.189 0.155 0.079 8
0.011 0.337 0.275 9
-0.02 0.515 0.244 6
0.099 0.582 -0.04 10
0.332 0.507 -0.456 9
0.515 0.413 -0.797 8
0.463 0.371 -0.718 9
0.49 0.343 -0.938 8
0.371 0.417 -1.093 8
0.202 0.552 -1.162 9
0.086 0.611 -1.098 8
-0.01 0.631 -0.882 9
-0.102 0.68 -0.496 8
-0.091 0.612 -0.446 8
-0.119 0.666 0.034 7
-0.063 0.666 0.448 10
0.032 0.634 0.675 9
0.134 0.608 0.678 8
0.173 0.575 0.483 8
0.128 0.565 0.225 9
0.115 0.509 0.203 8
0.108 0.539 0.018 8
0.088 0.522 -0.089 9
0.099 0.456 -0.087 8
0.215 0.381 0.073 9
0.307 0.444 0.308 8
0.276 0.4 0.278 7
0.251 0.629 0.449 10
0.168 0.814 0.522 8
0.089 0.882 0.505 9
-0.049 0.87 0.381 8
-0.189 0.798 0.164 8
-0.271 0.7 -0.019 9
-0.267 0.626 -0.078 8
-0.24 0.563 -0.07 9
-0.155 0.528 -0.084 8
-0.025 0.514 -0.084 8
0.077 0.51 -0.087 9
0.109 0.503 -0.079 6
0.165 0.458 0.067 11
0.254 0.317 0.273 8
0.229 0.285 0.246 8
0.271 0.108 0.276 9
0.249 0.057 0.125 8
0.154 0.131 -0.019 8
0.023 0.198 -0.079 9
-0.058 0.213 -0.086 8
-0.12 0.199 -0.123 9
-0.108 0.179 -0.11 8
-0.165 0.168 -0.152 8
-0.218 0.165 -0.14 7
-0.256 0.165 -0.089 10
-0.238 0.154 0.011 9
-0.187 0.099 0.132 8
-0.177 0.005 0.166 8
-0.159 0.005 0.149 9
-0.148 -0.056 0.158 8
-0.121 -0.066 0.192 9
-0.121 -0.046 0.206 8
-0.112 -0.018 0.219 8
-0.107 0.005 0.253 9
-0.129 0.033 0.313 8
-0.116 0.03 0.281 7
-0.189 0.071 0.34 10
-0.264 0.109 0.375 8
-0.291 0.122 0.38 9
-0.263 0.113 0.346 8
-0.215 0.091 0.305 8
-0.177 0.064 0.282 9
-0.159 0.058 0.254 8
-0.136 0.04 0.228 9
-0.116 0.029 0.186 8
-0.069 0.026 0.107 8
0.004 0.033 -0.003 9
0.069 0.042 -0.103 7
0.094 0.05 -0.17 10
0.085 0.045 -0.153 8
0.071 0.052 -0.165 8
0.03 0.049 -0.11 9
-0.021 0.031 -0.021 8
-0.061 0.02 0.038 9
-0.09 0.024 0.017 8
-0.116 0.026 -0.059 8
-0.104 0.023 -0.053 9
-0.097 0.015 -0.157 8
-0.041 -0.005 -0.28 9
0.034 -0.026 -0.377 6
0.059 -0.02 -0.411 10
0.023 0.003 -0.364 9
-0.016 0.019 -0.207 8
-0.015 0.017 -0.186 9
-0.017 0.013 -0.105 8
0.053 -0.037 -0.009 8
0.128 -0.114 0.203 9
0.058 -0.106 0.334 8
-0.098 0.0 0.372 8
-0.188 0.092 0.322 9
-0.169 0.083 0.29 8
-0.168 0.1 0.165 7
-0.112 0.076 0.029 10
-0.069 0.059 -0.056 8
-0.067 0.077 -0.115 9
-0.084 0.118 -0.168 8
-0.087 0.13 -0.247 9
-0.078 0.117 -0.223 8
-0.015 0.094 -0.346 8
0.112 0.028 -0.448 9
0.244 -0.082 -0.476 8
0.268 -0.175 -0.447 9
0.16 -0.159 -0.407 8
0.144 -0.143 -0.366 7
-0.012 -0.039 -0.345 10
-0.137 0.098 -0.315 8
-0.193 0.194 -0.253 9
-0.167 0.176 -0.17 8
-0.078 0.108 -0.09 8
0.042 0.043 -0.052 9
0.172 -0.01 -0.043 8
0.155 -0.009 -0.038 9
0.251 -0.039 -0.053 8
0.364 -0.048 -0.094 8
0.385 -0.076 -0.121 9
0.235 -0.115 -0.089 6
0.115 -0.093 0.016 10
0.051 -0.017 0.069 9
0.046 -0.015 0.062 8
-0.02 0.022 0.019 9
-0.054 0.019 -0.041 8
-0.029 0.016 -0.085 8
0.005 0.013 -0.106 9
-0.005 0.011 -0.097 8
-0.025 0.012 -0.043 9
-0.022 0.01 -0.039 8
-0.022 0.015 0.072 8
-0.051 0.02 0.213 7
-0.088 0.022 0.33 10
-0.115 0.022 0.37 9
-0.115 0.017 0.347 8
-0.057 0.008 0.306 8
-0.051 0.007 0.275 9
0.005 -0.001 0.208 8
0.048 -0.006 0.093 9
0.098 -0.008 -0.028 8
0.14 -0.009 -0.09 8
0.141 -0.004 -0.068 9
0.108 0.013 -0.006 8
0.097 0.011 -0.006 7
0.052 0.028 0.055 10
0.024 0.025 0.064 8
0.019 0.016 0.0 9
0.034 0.019 -0.084 8
0.062 0.019 -0.147 8
0.075 0.002 -0.179 9
0.068 0.001 -0.161 8
0.059 -0.009 -0.136 9
0.03 -0.01 -0.06 8
0.027 -0.012 -0.007 8
0.058 -0.023 -0.008 9
0.08 -0.036 -0.016 7
0.073 -0.048 -0.024 10
0.066 -0.043 -0.022 8
0.046 -0.051 -0.06 8
-0.008 -0.055 -0.125 9
0.028 -0.048 -0.172 8
0.073 -0.038 -0.21 9
0.007 -0.031 -0.281 8
-0.05 -0.017 -0.325 8
-0.045 -0.015 -0.293 9
-0.134 -0.003 -0.281 8
-0.135 0.018 -0.199 9
-0.109 0.035 -0.097 6
-0.143 0.033 -0.039 10
-0.182 0.021 -0.028 9
-0.182 0.025 -0.032 8
-0.164 0.023 -0.029 9
-0.173 0.024 -0.008 8
-0.2 0.007 0.01 8
-0.177 0.003 0.022 9
-0.194 0.003 0.011 8
-0.163 0.007 0.0 8
-0.125 0.013 0.012 9
-0.113 0.011 0.011 8
-0.15 0.012 0.035 7
-0.189 0.014 0.068 10
-0.224 0.042 0.136 8
-0.259 0.163 0.161 9
-0.239 0.269 0.131 8
-0.105 0.212 0.181 9
-0.094 0.191 0.163 8
0.051 0.093 0.27 8
0.095 0.074 0.357 9
0.08 0.119 0.443 8
0.074 0.188 0.513 9
0.065 0.238 0.515 8
0.058 0.214 0.464 7
0.078 0.177 0.398 10
0.159 0.056 0.258 8
0.228 -0.053 0.036 9
0.222 -0.113 -0.189 8
0.122 -0.13 -0.341 8
-0.027 -0.112 -0.425 9
-0.157 -0.078 -0.451 8
-0.141 -0.07 -0.406 8
# end
#Thu Feb 26 20:19:18 GMT+08:00 20150
