# Supplementary material for: Abnormal Gait Behavior Detection for Elderly Based on Enhanced Wigner-Ville Analysis and Cloud Incremental SVM Learning
Source: Hindawi journal article supplement (doi:10.1155/2016/5869238), 2016-01-01
Supplement: f1 [file 5869238.f1.zip › Supplementary Materials/Original Data/Sitting on a chair then standing/original__16.txt]

# Accelerometer Values
# filename:  original__16.txt
# Saving start time: Thu Feb 26 20:19:29 GMT+08:00 2015

# sensor resolution: 0.0095825195m/s^2
#Sensorvendor: KIONIX, name: KX023 Accelerometer, type: 1,version : 1, range 39.240005

# X value, Y value, Z value, time diff in ms
-0.082 -0.011 -0.247 8
-0.027 -0.023 -0.222 9
0.02 -0.024 -0.16 8
0.057 -0.015 -0.062 8
0.105 -0.008 0.04 9
0.155 -0.008 0.13 8
0.164 -0.012 0.188 8
0.147 -0.01 0.169 9
0.119 -0.011 0.196 7
0.067 -0.008 0.204 10
0.026 -0.004 0.199 8
-0.003 0.001 0.178 8
-0.05 0.008 0.134 9
-0.09 0.014 0.065 8
-0.081 0.012 0.059 9
-0.073 0.018 -0.022 8
-0.026 0.015 -0.096 8
0.027 0.01 -0.14 9
0.051 0.007 -0.149 8
0.045 0.004 -0.145 9
0.04 0.003 -0.13 6
0.051 0.001 -0.1 10
0.069 0.001 -0.024 9
0.056 0.006 0.051 8
0.027 0.009 0.11 9
0.011 0.001 0.163 8
0.007 -0.009 0.181 8
0.002 -0.012 0.168 9
0.002 -0.011 0.151 8
0.009 -0.012 0.121 9
0.019 -0.016 0.043 8
0.03 -0.02 -0.069 8
0.029 -0.019 -0.171 7
0.001 -0.008 -0.234 10
-0.022 -0.001 -0.237 8
-0.02 -0.001 -0.213 9
-0.019 0.002 -0.166 8
-0.002 0.005 -0.065 9
0.007 0.008 0.047 8
0.0 0.01 0.135 8
-0.013 0.012 0.184 9
-0.023 0.013 0.184 8
-0.021 0.011 0.165 9
-0.031 0.012 0.141 8
-0.036 0.012 0.103 7
-0.042 0.007 0.059 10
-0.039 0.0 0.021 8
-0.02 -0.005 -0.007 9
0.009 -0.009 -0.016 8
0.008 -0.008 -0.014 8
0.033 -0.011 -0.02 9
0.044 -0.018 -0.045 8
0.025 -0.02 -0.083 9
-0.018 -0.014 -0.111 8
-0.056 -0.004 -0.107 8
-0.072 0.002 -0.07 9
-0.065 0.002 -0.063 6
-0.052 0.002 -0.015 11
-0.023 -0.002 0.032 8
0.001 -0.004 0.053 8
0.034 -0.007 0.038 9
0.071 -0.013 0.015 8
0.088 -0.016 -0.008 9
0.079 -0.015 -0.007 8
0.068 -0.013 -0.027 8
0.021 -0.012 -0.051 9
-0.024 -0.009 -0.097 8
-0.024 -0.008 -0.154 8
0.008 -0.013 -0.173 7
0.029 -0.021 -0.119 10
0.026 -0.019 -0.107 9
0.01 -0.021 -0.004 8
-0.014 -0.02 0.118 8
-0.027 -0.037 0.209 9
-0.058 -0.066 0.231 8
-0.09 -0.089 0.172 9
-0.089 -0.102 0.062 8
-0.08 -0.092 0.055 8
-0.061 -0.113 0.026 9
-0.036 -0.138 0.083 8
-0.004 -0.219 0.134 7
-0.015 -0.333 0.125 10
-0.076 -0.364 -0.01 8
-0.126 -0.366 -0.184 9
-0.113 -0.329 -0.166 8
-0.114 -0.362 -0.287 8
-0.06 -0.391 -0.355 9
0.014 -0.396 -0.363 8
0.064 -0.371 -0.31 9
0.065 -0.359 -0.233 8
0.03 -0.378 -0.151 8
0.027 -0.34 -0.136 9
-0.004 -0.349 -0.041 7
-0.038 -0.338 0.063 10
-0.077 -0.341 0.143 8
-0.099 -0.352 0.165 9
-0.104 -0.352 0.097 8
-0.098 -0.331 -0.026 8
-0.088 -0.298 -0.024 9
-0.076 -0.275 -0.145 8
-0.062 -0.255 -0.318 8
-0.055 -0.239 -0.519 9
-0.056 -0.232 -0.652 8
-0.071 -0.241 -0.709 9
-0.063 -0.217 -0.638 6
-0.099 -0.243 -0.593 10
-0.154 -0.275 -0.423 9
-0.197 -0.311 -0.2 8
-0.191 -0.364 -0.027 9
-0.152 -0.428 0.058 8
-0.103 -0.485 0.051 8
-0.045 -0.551 -0.056 9
-0.04 -0.496 -0.051 8
0.007 -0.602 -0.177 8
0.047 -0.702 -0.215 9
0.071 -0.75 -0.146 8
0.071 -0.772 -0.037 7
0.047 -0.769 0.06 10
0.021 -0.74 0.138 8
0.019 -0.666 0.124 9
-0.01 -0.624 0.172 8
-0.034 -0.569 0.264 9
-0.101 -0.506 0.424 8
-0.028 -0.483 0.567 8
0.17 -0.463 0.491 9
0.288 -0.408 0.249 8
0.259 -0.367 0.224 9
0.321 -0.322 0.054 8
0.295 -0.244 -0.063 7
0.224 -0.106 -0.112 10
0.234 0.045 -0.077 8
0.233 0.198 -0.009 9
0.102 0.384 0.055 8
0.092 0.345 0.05 8
-0.046 0.506 0.123 9
-0.128 0.588 0.249 8
-0.159 0.613 0.432 9
-0.174 0.627 0.603 8
-0.188 0.647 0.694 8
-0.188 0.688 0.697 9
-0.169 0.619 0.628 6
-0.155 0.701 0.548 10
-0.125 0.778 0.316 9
-0.102 0.836 0.01 8
-0.094 0.896 -0.201 9
-0.08 0.95 -0.245 8
-0.061 0.976 -0.124 8
-0.055 0.878 -0.112 9
-0.046 0.876 0.098 8
-0.07 0.858 0.297 9
-0.026 0.857 0.437 8
0.025 0.932 0.502 8
-0.015 1.032 0.587 7
-0.051 1.087 0.735 10
-0.046 0.978 0.661 9
-0.066 1.033 0.773 8
-0.074 1.052 0.835 8
-0.068 1.016 0.867 9
-0.062 0.96 0.816 8
-0.063 0.912 0.682 9
-0.066 0.886 0.567 8
-0.059 0.797 0.51 8
-0.074 0.814 0.479 9
-0.095 0.848 0.528 8
-0.118 0.816 0.607 7
-0.086 0.758 0.658 10
-0.023 0.657 0.694 8
0.033 0.512 0.701 9
0.03 0.461 0.631 8
0.089 0.37 0.557 8
0.143 0.326 0.408 9
0.184 0.328 0.194 8
0.179 0.364 -0.065 9
0.132 0.43 -0.278 8
0.079 0.508 -0.446 8
0.071 0.458 -0.401 9
0.092 0.564 -0.51 6
0.185 0.655 -0.541 11
0.34 0.687 -0.599 8
0.507 0.683 -0.706 8
0.576 0.64 -0.81 9
0.554 0.555 -0.851 8
0.498 0.5 -0.766 9
0.377 0.376 -0.677 8
0.21 0.245 -0.456 8
0.076 0.134 -0.227 9
-0.057 0.077 -0.027 8
-0.196 0.028 0.138 9
-0.177 0.025 0.124 6
-0.294 -0.052 0.135 10
-0.342 -0.105 0.019 9
-0.292 -0.157 -0.192 8
-0.151 -0.248 -0.517 9
0.005 -0.363 -0.885 8
0.122 -0.444 -1.187 8
0.15 -0.478 -1.325 9
0.135 -0.43 -1.192 8
0.044 -0.434 -1.148 8
-0.097 -0.411 -0.896 9
-0.21 -0.372 -0.564 8
-0.27 -0.315 -0.235 7
-0.272 -0.257 0.076 10
-0.244 -0.231 0.295 8
-0.181 -0.208 0.266 9
-0.052 -0.178 0.364 8
0.073 -0.165 0.369 9
0.118 -0.161 0.338 8
0.059 -0.16 0.297 8
-0.04 -0.157 0.257 9
-0.036 -0.141 0.232 8
-0.102 -0.139 0.208 9
-0.138 -0.127 0.179 8
-0.14 -0.114 0.084 7
-0.108 -0.122 -0.065 10
-0.08 -0.15 -0.213 8
-0.078 -0.191 -0.294 9
-0.07 -0.172 -0.264 8
-0.075 -0.244 -0.252 8
-0.074 -0.347 -0.245 9
-0.054 -0.481 -0.276 8
-0.027 -0.613 -0.278 8
-0.038 -0.682 -0.274 9
-0.076 -0.678 -0.353 8
-0.069 -0.61 -0.318 9
-0.119 -0.579 -0.524 6
-0.146 -0.545 -0.782 10
-0.127 -0.512 -0.982 9
-0.079 -0.482 -1.07 8
-0.004 -0.471 -1.045 9
0.079 -0.468 -0.902 8
0.071 -0.421 -0.812 8
0.131 -0.425 -0.591 9
0.176 -0.462 -0.34 8
0.186 -0.513 -0.106 9
0.165 -0.47 0.044 8
0.17 -0.367 0.175 8
0.153 -0.33 0.157 7
0.161 -0.254 0.286 10
0.128 -0.179 0.344 8
0.061 -0.111 0.344 9
-0.009 -0.051 0.332 8
-0.06 -0.01 0.328 9
-0.077 0.006 0.328 8
-0.07 0.021 0.338 8
-0.063 0.019 0.304 9
-0.059 0.036 0.308 8
-0.063 0.048 0.297 9
-0.075 0.066 0.251 8
-0.094 0.093 0.177 7
-0.114 0.117 0.114 10
-0.123 0.131 0.041 8
-0.11 0.118 0.037 9
-0.105 0.111 -0.041 8
-0.082 0.087 -0.088 8
-0.058 0.056 -0.095 9
-0.037 0.028 -0.068 8
-0.034 0.011 -0.028 9
-0.056 0.003 0.006 8
-0.05 0.003 0.006 8
-0.072 0.004 0.048 9
-0.075 0.012 0.098 6
-0.065 0.021 0.167 11
-0.044 0.011 0.209 8
-0.013 -0.021 0.19 8
0.015 -0.05 0.136 9
0.013 -0.045 0.122 8
0.029 -0.061 0.081 9
0.032 -0.071 0.074 8
0.03 -0.077 0.095 8
0.025 -0.081 0.105 9
0.003 -0.071 0.073 8
-0.03 -0.05 0.027 8
-0.027 -0.045 0.024 7
-0.057 -0.031 -0.008 10
-0.073 -0.018 -0.031 9
-0.073 -0.014 -0.039 8
-0.053 -0.025 -0.035 8
-0.022 -0.044 -0.025 9
0.005 -0.05 -0.014 8
0.005 -0.045 -0.012 9
0.032 -0.041 0.003 8
0.047 -0.039 0.056 8
0.036 -0.021 0.145 9
0.008 0.009 0.221 8
-0.007 0.034 0.261 7
0.0 0.044 0.289 10
0.0 0.04 0.26 8
0.011 0.044 0.288 9
0.013 0.054 0.314 8
0.027 0.054 0.333 9
0.049 0.04 0.326 8
0.056 0.033 0.297 8
0.035 0.034 0.259 9
0.031 0.03 0.233 8
0.006 0.036 0.154 8
-0.002 0.025 0.012 9
0.0 0.003 -0.137 7
-0.006 -0.016 -0.242 10
-0.02 -0.024 -0.292 8
-0.025 -0.021 -0.3 8
-0.022 -0.018 -0.27 9
-0.005 -0.017 -0.246 8
0.012 -0.015 -0.162 9
0.01 -0.009 -0.021 8
0.003 -0.005 0.093 8
0.014 -0.01 0.12 9
0.012 -0.009 0.079 8
0.034 -0.008 0.071 9
0.046 -0.017 0.012 6
0.036 -0.024 -0.04 10
0.013 -0.023 -0.088 9
0.002 -0.012 -0.122 8
0.005 -0.009 -0.137 9
0.005 -0.008 -0.124 8
0.007 -0.008 -0.123 8
0.003 -0.004 -0.103 9
-0.005 0.004 -0.063 8
-0.011 0.015 -0.02 9
0.009 0.017 0.004 8
0.057 0.006 -0.005 8
0.052 0.005 -0.005 7
0.099 -0.001 -0.034 10
0.112 0.002 -0.052 8
0.082 0.009 -0.053 9
0.036 0.01 -0.042 8
-0.019 0.017 -0.038 9
-0.065 0.024 -0.06 8
-0.058 0.022 -0.054 8
-0.061 0.021 -0.09 9
-0.04 0.014 -0.112 8
-0.019 0.007 -0.116 9
-0.016 0.005 -0.102 8
-0.023 0.011 -0.077 7
-0.028 0.023 -0.053 10
-0.026 0.021 -0.048 8
-0.021 0.023 -0.043 9
-0.014 0.008 -0.061 8
-0.005 -0.001 -0.127 8
0.022 -0.006 -0.285 9
0.065 -0.016 -0.474 8
0.102 -0.019 -0.61 9
0.092 -0.017 -0.549 8
0.102 -0.015 -0.642 8
0.089 -0.016 -0.705 9
0.07 -0.021 -0.667 6
0.032 -0.026 -0.502 11
-0.002 -0.032 -0.3 8
0.0 -0.062 -0.132 8
0.0 -0.056 -0.119 9
0.036 -0.104 -0.018 8
0.055 -0.136 0.007 8
0.048 -0.144 -0.034 9
0.031 -0.13 -0.115 8
0.014 -0.102 -0.225 9
0.015 -0.078 -0.381 8
0.013 -0.07 -0.343 8
0.031 -0.05 -0.48 7
0.039 -0.033 -0.526 10
0.031 -0.024 -0.475 9
0.02 -0.021 -0.334 8
0.05 -0.019 -0.137 8
0.118 -0.003 0.134 9
0.107 -0.002 0.121 8
0.133 0.015 0.415 9
0.095 0.041 0.607 8
0.037 0.072 0.658 8
-0.018 0.086 0.601 9
-0.076 0.095 0.489 8
-0.068 0.085 0.44 7
-0.099 0.091 0.279 10
-0.087 0.085 0.098 8
-0.067 0.081 0.024 9
-0.059 0.085 0.104 8
-0.073 0.134 0.277 8
-0.126 0.256 0.558 9
-0.178 0.383 0.873 8
-0.16 0.344 0.786 9
-0.174 0.447 1.115 8
-0.178 0.541 1.43 8
-0.194 0.617 1.507 9
-0.16 0.657 1.343 7
-0.049 0.649 1.149 10
0.058 0.661 1.119 8
0.052 0.594 1.007 8
0.07 0.702 1.21 9
0.018 0.882 1.603 8
-0.031 0.99 2.1 9
-0.062 0.984 2.502 8
-0.075 0.972 2.774 8
-0.078 0.895 2.966 9
-0.07 0.806 2.67 8
-0.075 0.652 2.811 9
-0.061 0.468 2.909 6
-0.031 0.278 2.908 10
-0.016 0.105 2.742 9
-0.014 -0.045 2.465 8
-0.013 -0.04 2.144 9
-0.01 -0.152 1.929 8
0.001 -0.213 1.582 8
0.042 -0.277 1.199 9
0.13 -0.393 0.728 8
0.189 -0.489 0.253 8
0.127 -0.5 -0.114 9
0.114 -0.45 -0.103 8
0.012 -0.416 -0.414 7
-0.02 -0.412 -0.609 10
0.018 -0.515 -0.645 8
0.101 -0.668 -0.586 9
0.185 -0.792 -0.543 8
0.23 -0.881 -0.569 9
0.207 -0.793 -0.512 8
0.183 -0.802 -0.577 8
0.106 -0.706 -0.644 9
0.003 -0.565 -0.733 8
-0.091 -0.439 -0.848 9
-0.154 -0.36 -0.933 8
-0.138 -0.324 -0.84 7
-0.169 -0.293 -0.896 10
-0.159 -0.292 -0.941 8
-0.124 -0.324 -0.895 9
-0.107 -0.396 -0.734 8
-0.106 -0.448 -0.533 8
-0.113 -0.488 -0.362 9
-0.102 -0.587 -0.302 8
-0.092 -0.528 -0.272 8
-0.042 -0.654 -0.368 9
0.015 -0.76 -0.558 8
0.093 -0.849 -0.713 9
0.154 -0.953 -0.759 6
0.142 -1.049 -0.716 10
0.224 -1.143 -0.63 9
0.202 -1.029 -0.567 8
0.228 -1.097 -0.584 9
0.213 -1.13 -0.607 8
0.293 -1.133 -0.444 8
0.28 -1.103 -0.29 9
0.227 -1.087 -0.341 8
0.185 -1.082 -0.603 9
0.166 -0.974 -0.543 8
0.163 -0.982 -0.881 8
0.176 -0.947 -1.084 7
0.177 -0.881 -1.157 10
0.166 -0.803 -1.181 9
0.091 -0.797 -1.249 8
0.043 -0.813 -1.356 8
0.039 -0.732 -1.22 9
0.039 -0.689 -1.302 8
0.046 -0.632 -1.356 9
0.097 -0.608 -1.31 8
0.127 -0.624 -1.149 8
0.092 -0.599 -0.953 9
-0.007 -0.508 -0.754 8
-0.006 -0.457 -0.678 7
-0.143 -0.336 -0.508 10
-0.272 -0.174 -0.403 8
-0.343 -0.001 -0.356 9
-0.328 0.11 -0.405 8
-0.237 0.163 -0.541 8
-0.09 0.187 -0.673 9
-0.081 0.168 -0.606 8
0.078 0.169 -0.65 9
0.189 0.148 -0.565 8
0.242 0.126 -0.436 8
0.271 0.114 -0.342 9
0.244 0.103 -0.308 6
0.251 0.117 -0.238 11
0.207 0.171 -0.214 8
0.136 0.272 -0.197 8
0.094 0.41 -0.21 9
0.091 0.568 -0.277 8
0.085 0.713 -0.42 9
0.11 0.827 -0.538 8
0.099 0.744 -0.484 8
0.05 0.801 -0.6 9
-0.042 0.798 -0.593 8
-0.124 0.778 -0.347 8
-0.227 0.785 -0.109 7
-0.299 0.886 0.028 10
-0.361 0.936 0.237 9
-0.324 0.842 0.213 8
-0.336 0.758 0.525 8
-0.293 0.651 0.747 9
-0.201 0.577 0.784 8
-0.07 0.528 0.675 9
0.054 0.484 0.521 8
0.112 0.435 0.412 8
0.101 0.392 0.371 9
0.084 0.362 0.349 8
0.04 0.356 0.358 7
0.023 0.354 0.335 10
0.047 0.367 0.295 8
0.077 0.408 0.245 9
0.07 0.447 0.188 8
0.063 0.402 0.169 9
0.027 0.42 0.1 8
-0.003 0.421 0.035 8
-0.119 0.447 -0.012 9
-0.247 0.506 0.008 8
-0.289 0.55 0.059 8
-0.308 0.543 0.054 9
-0.278 0.489 0.049 7
-0.29 0.447 0.02 10
-0.29 0.384 0.003 8
-0.259 0.32 0.009 9
-0.205 0.261 0.009 8
-0.161 0.228 0.006 8
-0.143 0.224 0.031 9
-0.129 0.201 0.028 8
-0.135 0.211 0.071 8
-0.18 0.228 0.075 9
-0.222 0.257 0.055 8
-0.19 0.275 0.068 9
-0.171 0.248 0.061 6
0.09 0.168 0.111 10
0.081 0.151 0.1 9
0.257 0.082 0.086 8
0.378 0.019 0.051 9
0.415 -0.026 -0.014 8
0.396 -0.037 -0.093 8
0.349 -0.01 -0.157 9
0.285 0.024 -0.185 8
0.256 0.022 -0.167 9
0.177 0.05 -0.164 8
0.088 0.07 -0.151 8
0.017 0.081 -0.143 7
0.026 0.079 -0.121 10
0.095 0.056 -0.073 9
0.086 0.05 -0.065 8
0.153 0.016 -0.059 8
0.19 -0.015 -0.029 9
0.184 -0.027 -0.02 8
0.139 -0.024 -0.014 8
0.068 -0.012 -0.079 9
-0.015 0.006 -0.171 8
-0.013 0.006 -0.154 9
-0.059 0.022 -0.214 8
-0.031 0.014 -0.247 7
0.046 -0.008 -0.255 10
0.118 -0.025 -0.245 8
0.16 -0.043 -0.208 9
0.173 -0.056 -0.139 8
0.155 -0.05 -0.125 8
0.141 -0.044 -0.031 9
0.093 -0.018 0.059 8
0.036 0.014 0.102 9
0.001 0.038 0.084 8
0.0 0.05 0.053 8
0.029 0.053 -0.029 9
0.026 0.048 -0.026 6
0.067 0.027 -0.1 11
0.082 0.004 -0.097 8
0.048 0.021 -0.094 8
-0.008 0.058 -0.103 9
-0.077 0.088 -0.128 8
-0.126 0.092 -0.15 8
-0.114 0.083 -0.135 9
-0.104 0.072 -0.135 8
-0.062 0.053 -0.099 9
-0.035 0.033 -0.003 8
-0.047 0.024 0.123 8
-0.104 0.03 0.201 7
-0.164 0.044 0.181 10
-0.147 0.04 0.162 9
-0.159 0.051 0.061 8
-0.106 0.057 -0.049 8
-0.001 0.049 -0.121 9
0.096 0.025 -0.15 8
0.147 0.003 -0.145 9
0.14 0.0 -0.127 8
0.126 0.0 -0.114 8
0.071 0.008 -0.099 9
0.0 0.018 -0.095 8
-0.069 0.024 -0.095 7
-0.118 0.02 -0.087 10
-0.135 0.007 -0.056 8
-0.11 0.002 -0.023 9
-0.099 0.002 -0.02 8
-0.062 0.012 -0.007 8
-0.041 0.02 -0.012 9
0.001 0.018 -0.029 8
0.065 0.009 -0.04 9
0.111 0.0 -0.024 8
0.122 -0.006 0.02 8
0.11 -0.005 0.018 9
0.09 0.0 0.073 7
0.047 0.004 0.137 10
0.0 0.009 0.192 8
-0.01 0.011 0.203 8
-0.031 0.006 0.11 9
-0.028 0.005 -0.012 8
-0.073 0.0 -0.011 9
-0.065 0.007 -0.057 8
-0.026 0.016 -0.08 8
-0.012 0.012 -0.09 9
-0.029 0.013 -0.043 8
-0.052 0.031 0.025 9
-0.047 0.028 0.022 6
-0.082 0.05 0.033 10
-0.107 0.067 0.01 9
-0.116 0.064 -0.019 8
-0.117 0.046 -0.054 9
-0.118 0.026 -0.063 8
-0.102 0.008 -0.057 8
-0.092 0.007 -0.051 9
-0.05 -0.005 -0.05 8
0.0 -0.027 -0.045 9
0.024 -0.054 -0.03 8
0.016 -0.063 -0.027 8
0.017 -0.054 -0.039 7
0.051 -0.045 -0.038 10
0.046 -0.041 -0.035 8
0.059 -0.04 -0.035 9
0.029 -0.04 -0.034 8
0.018 -0.034 0.008 9
0.01 -0.021 0.076 8
-0.034 -0.009 0.169 8
-0.096 0.009 0.255 9
-0.086 0.008 0.23 8
-0.128 0.028 0.246 9
-0.137 0.036 0.146 8
-0.117 0.025 -0.004 7
-0.07 -0.006 -0.107 10
-0.01 -0.033 -0.15 8
0.029 -0.039 -0.15 9
0.026 -0.035 -0.135 8
0.036 -0.025 -0.083 8
0.032 -0.018 0.04 9
0.035 -0.016 0.163 8
0.065 -0.012 0.197 9
0.094 -0.009 0.162 8
0.076 -0.004 0.091 8
0.068 -0.003 0.082 9
0.016 0.0 -0.015 6
-0.032 0.003 -0.081 10
-0.049 0.011 -0.098 9
-0.036 0.01 -0.078 8
-0.017 0.008 -0.022 9
0.0 0.006 0.018 8
0.0 0.005 0.016 8
0.036 -0.001 0.019 9
0.076 -0.006 0.016 8
0.085 -0.011 0.025 9
0.048 -0.008 0.039 8
-0.03 0.007 0.052 8
-0.027 0.007 0.047 7
-0.102 0.044 0.047 10
-0.138 0.079 0.048 9
-0.137 0.078 0.086 8
-0.12 0.054 0.142 8
-0.107 0.032 0.187 9
-0.091 0.012 0.203 8
-0.082 0.01 0.194 9
-0.057 -0.006 0.175 8
-0.025 -0.016 0.119 8
0.017 -0.022 0.01 9
0.06 -0.028 -0.095 8
0.092 -0.034 -0.151 7
0.098 -0.037 -0.172 10
0.088 -0.033 -0.155 8
0.078 -0.032 -0.159 9
0.07 -0.031 -0.141 8
0.054 -0.028 -0.13 8
0.025 -0.041 -0.072 9
-0.016 -0.047 0.041 8
-0.053 0.008 0.134 9
-0.048 0.007 0.121 8
-0.039 0.07 0.185 8
-0.007 0.075 0.224 9
0.021 0.04 0.244 7
0.049 0.022 0.256 10
0.06 0.055 0.251 8
0.039 0.103 0.241 8
0.035 0.092 0.217 9
0.019 0.088 0.198 8
0.044 0.037 0.138 9
0.092 -0.01 -0.002 8
0.116 -0.033 -0.187 8
0.093 -0.036 -0.318 9
0.028 -0.032 -0.369 8
0.025 -0.028 -0.332 9
# end
#Thu Feb 26 20:19:34 GMT+08:00 20150
