# Supplementary material for: Abnormal Gait Behavior Detection for Elderly Based on Enhanced Wigner-Ville Analysis and Cloud Incremental SVM Learning
Source: Hindawi journal article supplement (doi:10.1155/2016/5869238), 2016-01-01
Supplement: f1 [file 5869238.f1.zip › Supplementary Materials/Original Data/Sitting on a chair then standing/original__17.txt]

# Accelerometer Values
# filename:  original__17.txt
# Saving start time: Thu Feb 26 20:19:36 GMT+08:00 2015

# sensor resolution: 0.0095825195m/s^2
#Sensorvendor: KIONIX, name: KX023 Accelerometer, type: 1,version : 1, range 39.240005

# X value, Y value, Z value, time diff in ms
-0.078 -0.006 -0.171 9
-0.109 0.009 -0.149 8
-0.113 0.022 -0.105 8
-0.092 0.024 -0.021 9
-0.083 0.022 -0.019 8
-0.065 0.018 0.089 9
-0.058 0.017 0.183 8
-0.057 0.011 0.226 8
-0.058 0.003 0.182 7
-0.04 -0.003 0.087 10
-0.007 -0.011 0.009 9
-0.006 -0.01 0.008 8
0.01 -0.01 -0.034 8
-0.003 0.0 -0.039 9
-0.018 0.012 -0.006 8
0.0 0.014 0.04 9
0.02 0.009 0.078 8
0.018 0.016 0.059 8
0.016 0.014 0.053 9
0.008 0.028 -0.01 8
0.004 0.027 -0.06 7
0.003 0.017 -0.088 10
0.01 0.01 -0.103 8
0.03 -0.002 -0.099 9
0.042 -0.021 -0.079 8
0.038 -0.019 -0.071 8
0.025 -0.03 -0.057 9
0.01 -0.031 -0.047 8
0.009 -0.024 -0.038 9
0.016 -0.021 -0.024 8
0.02 -0.022 0.002 8
0.012 -0.007 0.061 9
0.01 -0.006 0.055 7
0.003 0.012 0.097 10
0.033 0.011 0.073 8
0.093 0.001 0.018 8
0.11 -0.002 -0.024 9
0.048 0.011 -0.041 8
-0.027 0.035 -0.046 9
-0.024 0.031 -0.042 8
-0.038 0.03 -0.045 8
0.004 0.003 -0.051 9
0.027 -0.018 -0.064 8
0.001 -0.014 -0.073 9
-0.023 -0.005 -0.07 6
-0.011 -0.008 -0.062 10
-0.009 -0.007 -0.056 9
0.028 -0.012 -0.047 8
0.043 -0.004 -0.033 9
0.011 0.009 -0.017 8
-0.014 0.018 -0.008 8
-0.02 0.015 -0.007 9
-0.038 0.013 -0.001 8
-0.034 0.011 -0.001 8
-0.061 0.023 0.015 9
-0.054 0.021 0.03 8
-0.005 -0.003 0.042 7
0.021 -0.019 0.053 10
0.0 -0.015 0.062 8
-0.026 -0.008 0.061 9
-0.024 -0.007 0.055 8
-0.021 -0.01 0.033 9
0.014 -0.017 -0.007 8
0.044 -0.025 -0.045 8
0.051 -0.03 -0.074 9
0.045 -0.03 -0.1 8
0.041 -0.023 -0.121 9
0.037 -0.021 -0.109 8
0.021 -0.01 -0.11 7
-0.003 0.005 -0.082 10
-0.024 0.019 -0.024 8
-0.025 0.014 0.051 9
-0.014 -0.002 0.113 8
-0.012 -0.01 0.134 8
-0.001 -0.009 0.12 9
0.001 -0.011 0.092 8
-0.006 -0.007 0.04 8
-0.021 0.0 -0.002 9
-0.034 0.012 -0.026 8
-0.041 0.03 -0.041 9
-0.037 0.027 -0.037 6
-0.041 0.053 -0.045 10
-0.027 0.066 -0.043 9
-0.005 0.056 -0.035 8
0.006 0.048 -0.01 9
0.015 0.041 0.041 8
0.021 0.024 0.128 8
0.019 0.021 0.115 9
0.023 0.002 0.207 8
0.015 -0.01 0.253 9
-0.002 -0.023 0.228 8
-0.019 -0.034 0.155 8
-0.033 -0.039 0.101 7
-0.042 -0.043 0.087 10
-0.037 -0.038 0.078 9
-0.046 -0.043 0.083 8
-0.058 -0.044 0.068 8
-0.061 -0.041 0.001 9
-0.044 -0.045 -0.081 8
-0.018 -0.064 -0.148 8
0.006 -0.085 -0.204 9
0.005 -0.076 -0.183 8
0.009 -0.089 -0.206 9
-0.014 -0.095 -0.18 8
-0.052 -0.101 -0.124 7
-0.084 -0.092 -0.05 10
-0.099 -0.072 0.042 8
-0.112 -0.066 0.141 9
-0.1 -0.059 0.127 8
-0.106 -0.059 0.196 8
-0.095 -0.051 0.237 9
-0.079 -0.046 0.283 8
-0.076 -0.057 0.326 9
-0.073 -0.085 0.273 8
-0.037 -0.119 0.082 8
-0.034 -0.107 0.074 9
0.032 -0.151 -0.108 6
0.1 -0.194 -0.193 11
0.135 -0.216 -0.227 8
0.157 -0.191 -0.225 8
0.181 -0.154 -0.153 9
0.185 -0.178 -0.019 8
0.166 -0.16 -0.017 9
0.147 -0.222 0.071 8
0.106 -0.245 0.021 8
0.04 -0.239 -0.119 9
-0.022 -0.258 -0.302 8
-0.05 -0.304 -0.492 8
-0.045 -0.273 -0.443 7
-0.044 -0.318 -0.563 10
-0.025 -0.329 -0.58 9
0.008 -0.329 -0.477 8
0.051 -0.342 -0.258 8
0.079 -0.378 -0.064 9
0.074 -0.421 0.013 8
0.021 -0.436 0.028 9
0.018 -0.392 0.025 8
-0.058 -0.388 0.014 8
-0.12 -0.361 -0.013 9
-0.19 -0.329 -0.058 8
-0.254 -0.315 -0.099 7
-0.263 -0.317 -0.154 10
-0.191 -0.381 -0.232 8
-0.172 -0.343 -0.209 9
-0.039 -0.483 -0.2 8
0.093 -0.66 -0.08 9
0.197 -0.846 0.013 8
0.267 -0.97 0.012 8
0.283 -1.005 -0.068 9
0.238 -0.989 -0.162 8
0.214 -0.89 -0.146 8
0.132 -0.868 -0.2 9
0.041 -0.852 -0.221 7
-0.111 -0.793 -0.256 10
-0.109 -0.798 -0.234 8
-0.012 -0.892 -0.259 8
-0.033 -0.919 -0.443 9
-0.03 -0.827 -0.399 8
0.009 -0.851 -0.556 9
0.075 -0.852 -0.631 8
0.158 -0.82 -0.654 8
0.257 -0.756 -0.699 9
0.337 -0.643 -0.724 8
0.419 -0.531 -0.642 9
0.377 -0.478 -0.578 6
0.359 -0.349 -0.456 10
0.219 -0.17 -0.337 9
0.041 0.027 -0.154 8
-0.126 0.231 0.099 9
-0.213 0.509 0.377 8
-0.241 0.822 0.609 8
-0.217 0.74 0.548 9
-0.213 0.972 0.721 8
-0.173 1.072 0.906 9
-0.149 1.098 1.023 8
-0.159 1.124 0.916 8
-0.203 1.184 0.648 7
-0.238 1.301 0.374 10
-0.214 1.171 0.337 8
-0.22 1.31 0.208 9
-0.223 1.435 0.293 8
-0.204 1.55 0.556 9
-0.161 1.59 0.861 8
-0.099 1.605 1.136 8
-0.061 1.62 1.4 9
-0.055 1.458 1.26 8
-0.066 1.43 1.413 9
-0.082 1.349 1.386 8
-0.116 1.252 1.236 7
-0.161 1.206 1.128 10
-0.191 1.295 1.129 8
-0.187 1.488 1.188 9
-0.168 1.34 1.069 8
-0.168 1.507 1.225 8
-0.175 1.601 1.377 9
-0.16 1.689 1.428 8
-0.141 1.767 1.391 9
-0.123 1.806 1.249 8
-0.111 1.783 0.978 8
-0.1 1.605 0.88 9
-0.086 1.537 0.512 6
-0.03 1.424 0.007 11
0.067 1.255 -0.682 8
0.215 1.013 -1.545 8
0.409 0.786 -2.304 9
0.516 0.663 -2.674 8
0.464 0.596 -2.406 8
0.442 0.566 -2.353 9
0.338 0.58 -1.815 8
0.152 0.609 -0.929 9
-0.123 0.618 0.069 8
-0.498 0.591 1.023 8
-0.448 0.532 0.921 7
-0.768 0.5 1.653 10
-0.912 0.407 1.953 9
-0.9 0.2 1.776 8
-0.689 -0.071 1.234 8
-0.347 -0.351 0.519 9
-0.018 -0.586 -0.216 8
0.245 -0.767 -0.786 9
0.22 -0.69 -0.707 8
0.365 -0.825 -1.02 8
0.339 -0.905 -0.981 9
0.093 -0.927 -0.584 8
-0.292 -0.872 0.017 7
-0.574 -0.781 0.612 10
-0.517 -0.764 1.036 8
-0.465 -0.688 0.932 9
-0.623 -0.759 1.043 8
-0.453 -0.818 0.703 8
-0.146 -0.85 0.053 9
0.143 -0.851 -0.674 8
0.305 -0.806 -1.293 9
0.274 -0.725 -1.164 8
0.313 -0.643 -1.539 8
0.257 -0.568 -1.617 9
0.147 -0.56 -1.518 7
0.041 -0.622 -1.371 10
-0.037 -0.709 -1.23 8
-0.075 -0.78 -1.102 8
-0.067 -0.702 -0.992 9
-0.039 -0.739 -0.897 8
0.093 -0.747 -0.8 9
0.27 -0.756 -0.678 8
0.384 -0.755 -0.542 8
0.388 -0.724 -0.4 9
0.32 -0.667 -0.304 8
0.288 -0.601 -0.274 9
0.215 -0.55 -0.261 6
0.146 -0.498 -0.247 10
0.085 -0.468 -0.2 9
0.036 -0.451 -0.208 8
0.006 -0.436 -0.3 9
0.013 -0.442 -0.48 8
0.012 -0.398 -0.432 8
0.049 -0.433 -0.605 9
0.079 -0.446 -0.669 8
0.077 -0.402 -0.664 8
0.054 -0.305 -0.628 9
0.022 -0.184 -0.574 8
0.02 -0.166 -0.516 7
-0.006 -0.071 -0.441 10
-0.012 -0.01 -0.318 8
0.009 0.029 -0.15 9
0.043 0.064 0.044 8
0.07 0.104 0.267 9
0.066 0.147 0.456 8
0.053 0.203 0.551 8
0.048 0.183 0.496 9
0.052 0.214 0.551 8
0.043 0.208 0.582 9
0.035 0.228 0.557 8
0.031 0.262 0.5 7
0.025 0.283 0.441 10
0.025 0.308 0.379 8
0.023 0.277 0.341 9
0.029 0.277 0.287 8
0.028 0.25 0.263 8
0.002 0.239 0.267 9
-0.041 0.224 0.302 8
-0.087 0.208 0.371 9
-0.117 0.187 0.448 8
-0.105 0.168 0.403 8
-0.102 0.117 0.452 9
-0.069 0.04 0.413 6
-0.022 -0.059 0.29 10
0.015 -0.155 0.174 9
0.028 -0.21 0.107 8
0.025 -0.239 0.07 9
0.022 -0.215 0.063 8
0.016 -0.232 0.048 8
0.003 -0.239 0.067 9
-0.01 -0.24 0.133 8
-0.025 -0.235 0.228 9
-0.017 -0.236 0.293 8
0.023 -0.257 0.299 8
0.021 -0.231 0.269 7
0.068 -0.255 0.218 10
0.092 -0.246 0.102 9
0.093 -0.205 -0.025 8
0.097 -0.168 -0.122 8
0.102 -0.146 -0.19 9
0.107 -0.121 -0.224 8
0.096 -0.109 -0.202 9
0.111 -0.086 -0.187 8
0.126 -0.071 -0.128 8
0.124 -0.055 -0.033 9
0.102 -0.043 0.079 8
0.092 -0.039 0.071 7
0.038 -0.003 0.286 10
0.034 -0.003 0.257 8
0.004 0.014 0.298 9
-0.018 0.03 0.3 8
-0.04 0.046 0.288 8
-0.058 0.057 0.28 9
-0.056 0.061 0.27 8
-0.045 0.058 0.251 9
-0.04 0.052 0.226 8
-0.029 0.047 0.199 8
-0.006 0.038 0.139 9
0.024 0.028 0.032 6
0.058 0.013 -0.086 11
0.07 0.002 -0.157 8
0.049 0.003 -0.161 8
0.044 0.002 -0.144 9
0.016 0.009 -0.084 8
-0.002 0.01 -0.01 9
-0.004 0.001 0.03 8
-0.006 -0.002 0.057 8
-0.019 0.007 0.065 9
-0.017 0.006 0.058 8
-0.016 0.008 0.066 9
0.011 -0.004 0.095 6
0.041 -0.016 0.11 10
0.036 -0.014 0.119 9
0.008 0.002 0.117 8
-0.005 0.011 0.098 8
-0.005 0.01 0.088 9
0.001 0.001 0.049 8
0.014 -0.012 -0.023 9
0.021 -0.02 -0.108 8
0.026 -0.026 -0.169 8
0.047 -0.032 -0.168 9
0.073 -0.037 -0.119 8
0.066 -0.033 -0.107 7
0.064 -0.031 -0.049 10
0.033 -0.02 -0.011 8
0.016 -0.012 -0.006 9
0.018 -0.014 -0.016 8
0.013 -0.013 -0.047 9
-0.005 -0.001 -0.086 8
-0.004 -0.001 -0.078 8
-0.023 0.007 -0.113 9
-0.021 0.008 -0.148 8
-0.004 0.004 -0.174 9
0.005 0.002 -0.179 8
0.0 0.01 -0.16 7
-0.017 0.027 -0.14 10
-0.015 0.024 -0.126 8
-0.035 0.035 -0.096 9
-0.053 0.03 -0.058 8
-0.061 0.021 -0.03 8
-0.061 0.017 -0.009 9
-0.046 0.008 -0.006 8
-0.006 -0.01 -0.003 8
-0.005 -0.009 -0.003 9
0.022 -0.024 0.011 8
0.025 -0.023 0.016 9
0.032 -0.013 -0.011 6
0.05 -0.009 -0.053 10
0.05 -0.007 -0.079 9
0.018 0.005 -0.061 8
0.016 0.005 -0.055 9
-0.03 0.019 -0.014 8
-0.055 0.023 0.006 8
-0.049 0.016 -0.006 9
-0.028 0.0 -0.042 8
-0.011 -0.012 -0.077 9
0.0 -0.015 -0.108 8
0.0 -0.013 -0.097 8
0.017 -0.018 -0.12 7
0.032 -0.024 -0.127 10
0.023 -0.015 -0.12 9
0.001 0.003 -0.106 8
-0.014 0.019 -0.093 8
-0.019 0.024 -0.086 9
-0.017 0.022 -0.077 8
-0.022 0.023 -0.079 8
-0.017 0.019 -0.1 9
0.005 0.009 -0.127 8
0.042 -0.004 -0.14 9
0.06 -0.008 -0.126 8
0.054 -0.007 -0.113 7
0.039 0.002 -0.078 10
0.017 0.015 -0.044 8
0.001 0.02 -0.018 9
-0.008 0.02 0.0 8
-0.019 0.015 0.006 8
-0.039 0.012 0.007 9
-0.057 0.009 0.002 8
-0.051 0.008 0.001 9
-0.043 -0.003 -0.004 8
-0.016 -0.026 -0.007 8
0.006 -0.046 -0.003 9
0.016 -0.052 0.002 6
0.015 -0.058 0.003 11
-0.002 -0.056 -0.003 8
-0.002 -0.051 -0.003 8
-0.024 -0.044 -0.017 9
-0.039 -0.037 -0.028 8
-0.046 -0.021 -0.034 9
-0.035 -0.017 -0.023 8
-0.006 -0.029 0.002 8
0.018 -0.035 0.046 9
0.016 -0.031 0.042 8
0.033 -0.032 0.106 8
0.038 -0.037 0.165 7
0.02 -0.026 0.164 10
-0.003 -0.015 0.104 9
-0.021 -0.01 0.043 8
-0.039 -0.005 0.001 8
-0.035 -0.004 0.0 9
-0.04 -0.009 -0.021 8
-0.039 -0.02 -0.029 9
-0.038 -0.031 -0.039 8
-0.031 -0.064 -0.049 8
-0.014 -0.113 -0.049 9
0.005 -0.132 -0.04 8
0.004 -0.119 -0.036 7
0.023 -0.121 -0.023 10
0.031 -0.124 -0.001 8
0.013 -0.105 0.027 9
-0.013 -0.071 0.037 8
-0.028 -0.073 0.021 9
-0.037 -0.103 -0.012 8
-0.033 -0.093 -0.01 8
-0.034 -0.141 -0.06 9
-0.029 -0.21 -0.11 8
-0.033 -0.275 -0.141 8
-0.025 -0.293 -0.127 9
-0.023 -0.263 -0.114 7
0.015 -0.185 -0.127 10
0.014 -0.167 -0.115 8
0.032 -0.13 -0.211 8
0.026 -0.102 -0.272 9
-0.006 -0.078 -0.326 8
-0.037 -0.079 -0.411 9
-0.044 -0.087 -0.494 8
-0.03 -0.103 -0.529 8
-0.027 -0.093 -0.476 9
-0.005 -0.117 -0.421 8
0.016 -0.132 -0.296 9
0.045 -0.159 -0.172 6
0.073 -0.188 -0.02 10
0.068 -0.177 0.139 9
0.031 -0.12 0.225 8
0.028 -0.108 0.202 9
-0.005 -0.064 0.229 8
-0.021 -0.047 0.25 8
-0.04 -0.018 0.283 9
-0.066 0.054 0.342 8
-0.094 0.15 0.464 8
-0.084 0.135 0.659 9
-0.089 0.121 0.593 8
-0.037 0.308 0.795 7
0.041 0.322 1.018 10
0.093 0.307 1.28 8
0.105 0.302 1.455 9
0.075 0.328 1.487 8
0.068 0.295 1.338 9
0.031 0.356 1.261 8
0.011 0.466 1.144 8
-0.018 0.644 1.071 9
-0.066 0.815 1.162 8
-0.088 0.902 1.438 9
-0.083 0.918 1.758 8
-0.075 0.826 1.582 7
-0.098 0.83 1.942 10
-0.167 0.844 2.357 8
-0.226 0.829 2.699 9
-0.244 0.776 2.912 8
-0.241 0.707 3.074 8
-0.242 0.594 3.174 9
-0.218 0.535 2.857 8
-0.245 0.418 2.939 9
-0.274 0.334 2.908 8
-0.257 0.255 2.627 8
-0.199 0.179 2.234 9
-0.121 0.12 1.92 6
-0.055 0.047 1.704 11
-0.05 0.042 1.534 8
-0.039 -0.058 1.429 8
-0.055 -0.155 1.354 9
-0.093 -0.228 1.219 8
-0.163 -0.259 1.021 8
-0.235 -0.3 0.718 9
-0.262 -0.369 0.308 8
-0.235 -0.332 0.277 9
-0.202 -0.358 -0.059 8
-0.145 -0.321 -0.263 8
-0.088 -0.265 -0.409 7
-0.035 -0.2 -0.526 10
0.013 -0.139 -0.637 9
0.057 -0.117 -0.756 8
0.051 -0.106 -0.68 8
0.075 -0.09 -0.76 9
0.072 -0.084 -0.744 8
0.05 -0.111 -0.694 9
0.012 -0.153 -0.678 8
-0.025 -0.212 -0.693 8
-0.061 -0.281 -0.797 9
-0.055 -0.253 -0.717 8
-0.075 -0.318 -0.932 7
-0.062 -0.394 -1.171 10
-0.011 -0.534 -1.415 8
0.025 -0.715 -1.688 9
0.0 -0.848 -1.885 8
-0.055 -0.956 -1.909 8
-0.05 -0.86 -1.718 9
-0.07 -0.979 -1.657 8
0.0 -1.09 -1.559 9
0.133 -1.319 -1.415 8
0.26 -1.645 -1.174 8
0.342 -1.941 -0.915 9
0.308 -1.747 -0.823 7
0.332 -1.983 -0.748 10
0.315 -2.067 -0.84 8
0.317 -2.025 -1.058 8
0.354 -1.939 -1.375 9
0.451 -1.822 -1.708 8
0.45 -1.732 -2.168 9
0.404 -1.646 -2.615 8
0.364 -1.481 -2.354 8
0.397 -1.34 -2.454 9
0.347 -1.185 -2.14 8
0.224 -1.038 -1.638 9
0.099 -0.877 -1.122 6
0.012 -0.723 -0.655 10
-0.028 -0.61 -0.307 9
-0.025 -0.549 -0.277 8
-0.021 -0.504 -0.008 9
0.038 -0.517 0.184 8
0.145 -0.519 0.195 8
0.242 -0.475 0.075 9
0.281 -0.396 -0.145 8
0.258 -0.298 -0.468 8
0.232 -0.268 -0.421 9
0.18 -0.192 -0.712 8
0.166 -0.097 -0.815 7
0.268 0.029 -0.689 10
0.268 0.176 -0.518 8
0.176 0.344 -0.437 9
0.172 0.534 -0.428 8
0.155 0.481 -0.385 9
0.128 0.635 -0.435 8
0.089 0.709 -0.496 8
0.093 0.768 -0.513 9
0.153 0.832 -0.481 8
0.249 0.901 -0.428 9
0.263 0.965 -0.37 8
0.236 0.868 -0.333 7
0.169 0.923 -0.274 10
0.099 0.971 -0.22 8
0.008 0.996 -0.172 9
-0.093 0.977 -0.073 8
-0.155 0.945 0.087 8
-0.181 0.923 0.237 9
-0.163 0.83 0.214 8
-0.148 0.811 0.344 9
-0.18 0.855 0.452 8
-0.243 0.931 0.547 8
-0.209 0.918 0.602 9
-0.125 0.852 0.597 6
-0.039 0.754 0.566 10
-0.035 0.679 0.509 9
0.046 0.57 0.468 8
0.115 0.473 0.408 9
0.164 0.39 0.301 8
0.168 0.334 0.128 8
0.119 0.319 -0.016 9
0.055 0.335 -0.053 8
0.049 0.302 -0.048 9
-0.009 0.334 -0.017 8
-0.094 0.395 0.0 8
-0.203 0.495 -0.016 7
-0.287 0.563 -0.037 10
-0.303 0.575 -0.083 9
-0.251 0.546 -0.135 8
-0.226 0.491 -0.122 8
-0.157 0.419 -0.118 9
-0.105 0.335 -0.044 8
-0.085 0.287 0.023 9
-0.089 0.29 0.038 8
-0.107 0.316 0.032 8
-0.136 0.344 0.031 9
-0.122 0.309 0.028 8
-0.158 0.341 0.014 7
-0.175 0.353 -0.034 10
-0.171 0.331 -0.1 8
-0.15 0.275 -0.15 9
-0.112 0.198 -0.19 8
-0.072 0.132 -0.263 8
-0.065 0.118 -0.236 9
-0.028 0.103 -0.326 8
0.001 0.118 -0.388 9
0.01 0.126 -0.438 8
0.003 0.128 -0.479 8
-0.005 0.137 -0.478 9
-0.005 0.124 -0.43 7
-0.014 0.15 -0.396 10
-0.024 0.181 -0.357 8
-0.026 0.194 -0.331 8
-0.018 0.194 -0.356 9
0.005 0.186 -0.453 8
0.039 0.17 -0.555 9
0.099 0.16 -0.585 8
0.089 0.144 -0.526 8
0.18 0.129 -0.464 9
0.265 0.111 -0.327 8
0.309 0.103 -0.167 9
0.317 0.107 -0.011 6
0.292 0.119 0.103 10
0.262 0.107 0.093 9
0.226 0.119 0.152 8
0.189 0.114 0.18 8
0.153 0.094 0.185 9
0.125 0.079 0.164 8
0.115 0.082 0.131 9
0.104 0.079 0.112 8
0.094 0.071 0.101 8
0.069 0.051 0.129 9
0.054 0.029 0.228 8
0.057 0.013 0.365 7
0.065 0.004 0.46 10
0.06 0.001 0.502 8
0.04 0.004 0.522 9
0.036 0.004 0.47 8
0.006 0.011 0.451 9
-0.069 0.017 0.376 8
-0.177 0.025 0.253 8
-0.256 0.055 0.079 9
-0.28 0.09 -0.081 8
-0.247 0.079 -0.159 9
-0.222 0.071 -0.143 8
-0.151 0.033 -0.143 7
-0.065 0.004 -0.11 10
0.034 -0.013 -0.133 8
0.133 -0.034 -0.154 8
0.196 -0.047 -0.136 9
0.164 -0.037 -0.118 8
0.147 -0.033 -0.106 9
0.033 -0.006 -0.058 8
-0.084 0.033 0.009 8
-0.161 0.068 0.087 9
-0.181 0.073 0.15 8
-0.179 0.06 0.206 9
-0.161 0.054 0.186 6
-0.155 0.038 0.216 10
-0.129 0.023 0.158 9
-0.069 -0.001 0.099 8
0.002 -0.041 0.121 9
0.045 -0.063 0.139 8
0.042 -0.053 0.123 8
0.002 -0.027 0.096 9
0.002 -0.024 0.087 8
-0.035 -0.012 0.061 9
-0.048 -0.015 0.016 8
-0.047 -0.015 -0.031 8
-0.032 -0.007 -0.059 7
-0.017 -0.002 -0.086 10
-0.016 -0.001 -0.092 9
-0.014 -0.001 -0.083 8
-0.013 -0.004 -0.053 8
-0.007 -0.015 0.0 9
-0.013 -0.025 0.011 8
-0.016 -0.028 -0.036 8
0.0 -0.024 -0.096 9
0.005 -0.022 -0.125 8
0.005 -0.02 -0.112 9
0.001 -0.023 -0.104 8
0.006 -0.022 -0.061 7
0.009 -0.011 0.002 10
0.026 -0.005 0.046 8
0.067 -0.009 0.055 9
0.087 -0.016 0.021 8
0.078 -0.015 0.018 8
0.07 -0.018 -0.04 9
0.031 -0.014 -0.075 8
-0.024 -0.009 -0.085 9
-0.071 -0.002 -0.097 8
-0.092 0.002 -0.101 8
-0.092 0.002 -0.048 9
-0.083 0.002 -0.043 6
-0.071 -0.005 0.055 11
-0.034 -0.011 0.148 8
0.039 -0.017 0.217 8
0.11 -0.026 0.22 9
0.104 -0.028 0.164 8
0.06 -0.022 0.196 9
0.054 -0.02 0.177 8
0.035 -0.001 0.253 8
0.032 0.021 0.253 9
0.029 0.034 0.211 8
0.012 0.03 0.098 8
0.011 0.027 -0.07 7
0.0 0.012 -0.21 10
0.0 0.011 -0.189 9
-0.007 -0.001 -0.268 8
-0.005 -0.018 -0.283 8
0.009 -0.027 -0.244 9
0.025 -0.019 -0.185 8
0.03 -0.009 -0.128 9
0.027 -0.012 -0.058 8
0.024 -0.01 -0.052 8
0.022 -0.013 0.022 9
0.025 -0.009 0.045 8
0.034 0.006 -0.019 7
0.032 0.024 -0.121 10
0.032 0.031 -0.188 8
0.029 0.028 -0.204 9
0.016 0.025 -0.183 8
-0.019 0.0 -0.165 8
-0.05 -0.012 -0.127 9
-0.071 -0.009 -0.048 8
-0.091 0.002 0.055 9
-0.101 0.014 0.115 8
-0.091 0.012 0.103 8
-0.095 0.021 0.089 9
-0.092 0.024 0.02 7
-0.089 0.024 -0.052 10
-0.089 0.035 -0.094 8
-0.081 0.041 -0.114 8
-0.071 0.041 -0.122 9
-0.064 0.037 -0.109 8
-0.055 0.045 -0.107 9
-0.05 0.053 -0.097 8
-0.053 0.055 -0.081 8
-0.058 0.064 -0.056 9
-0.068 0.067 -0.024 8
-0.075 0.049 -0.001 9
-0.067 0.044 -0.001 6
-0.058 0.03 -0.002 10
-0.033 0.016 -0.016 9
-0.007 0.011 -0.036 8
-0.004 0.024 -0.05 9
-0.013 0.039 -0.067 8
-0.022 0.048 -0.09 8
-0.019 0.043 -0.081 9
-0.033 0.046 -0.109 8
-0.038 0.043 -0.114 9
-0.045 0.035 -0.095 8
-0.055 0.038 -0.114 8
-0.061 0.041 -0.161 7
-0.056 0.03 -0.186 10
-0.05 0.027 -0.167 8
-0.036 0.018 -0.163 9
-0.015 0.003 -0.135 8
0.005 -0.015 -0.136 9
0.024 -0.035 -0.116 8
0.022 -0.043 -0.05 8
-0.015 0.009 -0.017 9
-0.013 0.008 -0.015 8
-0.032 0.092 -0.006 9
0.014 0.103 0.01 8
0.105 0.037 0.054 7
0.182 -0.02 0.113 10
0.19 -0.011 0.156 8
0.144 0.034 0.176 9
0.129 0.031 0.158 8
0.075 0.069 0.174 8
0.032 0.092 0.159 9
0.006 0.097 0.102 8
-0.018 0.074 0.039 9
-0.048 0.062 -0.027 8
-0.074 0.052 -0.123 8
-0.066 0.046 -0.11 9
-0.084 0.038 -0.221 6
-0.091 0.049 -0.293 11
# end
#Thu Feb 26 20:19:43 GMT+08:00 2015-
