# Supplementary material for: Abnormal Gait Behavior Detection for Elderly Based on Enhanced Wigner-Ville Analysis and Cloud Incremental SVM Learning
Source: Hindawi journal article supplement (doi:10.1155/2016/5869238), 2016-01-01
Supplement: f1 [file 5869238.f1.zip › Supplementary Materials/Original Data/Sitting on a chair then standing/original__18.txt]

# Accelerometer Values
# filename:  original__18.txt
# Saving start time: Thu Feb 26 20:19:45 GMT+08:00 2015

# sensor resolution: 0.0095825195m/s^2
#Sensorvendor: KIONIX, name: KX023 Accelerometer, type: 1,version : 1, range 39.240005

# X value, Y value, Z value, time diff in ms
-0.075 0.025 -0.148 8
-0.122 0.067 -0.18 9
-0.128 0.091 -0.143 8
-0.098 0.074 -0.055 9
-0.053 0.031 0.04 8
-0.005 0.004 0.12 8
-0.004 0.004 0.108 9
0.039 -0.004 0.157 8
0.07 -0.008 0.18 7
0.085 -0.013 0.175 10
0.082 -0.027 0.15 8
0.06 -0.041 0.11 9
0.023 -0.036 0.041 8
0.02 -0.032 0.037 8
-0.024 -0.028 -0.057 9
-0.062 -0.016 -0.172 8
-0.087 0.01 -0.282 9
-0.101 0.044 -0.312 8
-0.1 0.058 -0.244 8
-0.082 0.037 -0.107 9
-0.074 0.033 -0.096 7
-0.047 0.004 0.05 10
-0.019 -0.03 0.158 8
0.0 -0.058 0.218 8
0.009 -0.066 0.223 9
0.019 -0.075 0.191 8
0.032 -0.088 0.129 9
0.029 -0.079 0.116 8
0.042 -0.091 0.031 8
0.039 -0.091 -0.046 9
0.022 -0.084 -0.087 8
0.016 -0.082 -0.105 9
0.024 -0.086 -0.158 6
0.036 -0.087 -0.248 10
0.033 -0.078 -0.223 9
0.044 -0.072 -0.29 8
0.055 -0.065 -0.272 9
0.033 -0.058 -0.169 8
-0.011 -0.048 -0.025 8
-0.047 -0.039 0.095 9
-0.067 -0.043 0.153 8
-0.06 -0.038 0.138 8
-0.056 -0.047 0.153 9
-0.031 -0.058 0.149 8
0.0 -0.085 0.153 7
0.021 -0.119 0.15 10
0.025 -0.158 0.066 8
0.024 -0.206 -0.103 9
0.021 -0.185 -0.092 8
0.031 -0.207 -0.225 9
0.039 -0.203 -0.221 8
0.022 -0.182 -0.177 8
0.016 -0.173 -0.189 9
0.027 -0.217 -0.176 8
0.029 -0.211 -0.083 9
0.026 -0.19 -0.075 8
0.031 -0.117 -0.001 7
0.028 -0.1 -0.044 10
-0.01 -0.153 -0.168 8
-0.068 -0.219 -0.316 9
-0.117 -0.257 -0.444 8
-0.144 -0.271 -0.475 8
-0.13 -0.244 -0.427 9
-0.137 -0.26 -0.351 8
-0.12 -0.274 -0.241 8
-0.097 -0.262 -0.131 9
-0.096 -0.203 -0.001 8
-0.11 -0.112 0.173 9
-0.099 -0.101 0.156 6
-0.123 -0.05 0.317 10
-0.132 -0.076 0.395 9
-0.085 -0.169 0.404 8
-0.025 -0.294 0.346 9
0.0 -0.374 0.183 8
0.008 -0.399 -0.057 8
0.004 -0.398 -0.259 9
0.003 -0.358 -0.233 8
0.001 -0.358 -0.293 9
0.003 -0.373 -0.177 8
0.013 -0.416 0.04 8
0.036 -0.495 0.22 7
0.066 -0.588 0.306 10
0.092 -0.656 0.314 9
0.083 -0.59 0.282 8
0.095 -0.622 0.22 8
0.106 -0.635 0.127 9
0.115 -0.651 0.034 8
0.147 -0.661 0.019 9
0.207 -0.657 0.104 8
0.254 -0.664 0.194 8
0.229 -0.598 0.174 9
0.253 -0.62 0.243 8
0.23 -0.589 0.351 7
0.157 -0.482 0.563 10
0.083 -0.328 0.795 8
0.052 -0.194 0.951 9
0.055 -0.095 1.049 8
0.049 -0.085 0.944 8
0.02 0.022 0.963 9
-0.05 0.157 0.865 8
-0.13 0.285 0.745 9
-0.21 0.369 0.66 8
-0.265 0.412 0.605 8
-0.238 0.371 0.566 9
-0.224 0.334 0.509 7
-0.159 0.367 0.509 10
-0.098 0.342 0.507 8
-0.043 0.332 0.419 8
0.031 0.324 0.285 9
0.121 0.314 0.177 8
0.109 0.283 0.16 9
0.187 0.274 0.082 8
0.213 0.263 0.001 8
0.212 0.267 -0.075 9
0.229 0.27 -0.082 8
0.244 0.255 -0.017 8
0.22 0.229 -0.015 7
0.213 0.222 0.041 10
0.192 0.243 0.044 9
0.18 0.266 -0.043 8
0.191 0.279 -0.212 8
0.221 0.289 -0.393 9
0.218 0.324 -0.468 8
0.153 0.415 -0.353 9
0.138 0.374 -0.318 8
0.052 0.513 -0.131 8
-0.012 0.62 0.037 9
-0.05 0.652 0.158 8
-0.063 0.654 0.231 7
-0.039 0.675 0.307 10
0.007 0.764 0.422 8
0.006 0.687 0.38 9
0.045 0.823 0.593 8
0.057 0.944 0.823 9
0.034 1.03 0.948 8
-0.015 1.071 1.024 8
-0.055 1.104 1.155 9
-0.056 1.146 1.303 8
-0.05 1.031 1.172 8
-0.037 1.082 1.286 9
-0.057 1.111 1.332 7
-0.127 1.083 1.219 10
-0.056 1.112 1.057 8
0.029 1.114 0.909 9
0.069 0.986 0.658 8
0.062 0.888 0.592 8
0.203 0.755 0.289 9
0.346 0.591 0.086 8
0.447 0.4 0.161 8
0.452 0.194 0.429 9
0.35 0.011 0.663 8
0.164 -0.064 0.751 9
0.147 -0.057 0.676 6
-0.041 -0.076 0.587 10
-0.186 -0.111 0.264 9
-0.262 -0.138 -0.25 8
-0.285 -0.148 -0.821 9
-0.307 -0.155 -1.344 8
-0.329 -0.178 -1.752 8
-0.296 -0.16 -1.577 9
-0.296 -0.221 -1.811 8
-0.287 -0.277 -1.788 9
-0.313 -0.3 -1.524 8
-0.339 -0.285 -1.142 8
-0.31 -0.254 -0.816 7
-0.249 -0.245 -0.638 10
-0.224 -0.22 -0.574 9
-0.168 -0.211 -0.544 8
-0.12 -0.145 -0.603 8
-0.1 -0.046 -0.662 9
-0.119 0.02 -0.669 8
-0.157 0.061 -0.602 8
-0.208 0.102 -0.468 9
-0.187 0.092 -0.421 8
-0.294 0.193 -0.287 9
-0.264 0.253 -0.16 8
-0.16 0.272 -0.179 7
-0.143 0.244 -0.298 10
-0.11 0.139 -0.352 8
-0.105 0.081 -0.332 9
-0.095 0.073 -0.298 8
-0.099 0.027 -0.19 8
-0.127 -0.009 -0.027 9
-0.187 -0.023 0.131 8
-0.182 -0.039 0.219 9
-0.126 -0.046 0.196 8
-0.074 -0.037 0.096 8
-0.067 -0.033 0.086 9
-0.025 -0.016 -0.023 6
0.011 -0.005 -0.101 11
0.047 -0.011 -0.218 8
0.095 -0.036 -0.368 8
0.138 -0.12 -0.368 9
0.14 -0.278 -0.19 8
0.126 -0.25 -0.171 8
0.11 -0.456 0.053 9
0.106 -0.635 0.218 8
0.182 -0.765 0.307 9
0.198 -0.885 0.325 8
0.185 -0.893 0.3 8
0.167 -0.803 0.27 7
0.206 -0.722 0.243 10
0.217 -0.672 0.214 9
0.187 -0.685 0.157 8
0.108 -0.739 -0.024 8
0.071 -0.745 -0.288 9
0.042 -0.686 -0.47 8
0.016 -0.614 -0.535 9
0.014 -0.553 -0.481 8
0.088 -0.456 -0.508 8
0.169 -0.352 -0.589 9
0.183 -0.253 -0.811 8
0.181 -0.112 -1.054 7
0.122 -0.018 -1.029 10
0.031 -0.031 -0.717 8
0.028 -0.028 -0.645 9
-0.043 -0.038 -0.325 8
-0.079 0.001 -0.141 8
-0.072 0.039 -0.047 9
-0.03 0.027 0.017 8
0.03 -0.04 0.114 9
0.094 -0.133 0.236 8
0.085 -0.12 0.212 8
0.096 -0.139 0.243 9
0.025 -0.023 0.171 7
-0.097 0.149 0.107 10
-0.218 0.254 0.082 8
-0.285 0.265 0.06 8
-0.275 0.225 0.067 9
-0.247 0.203 0.06 8
-0.164 0.125 0.155 9
-0.037 0.023 0.283 8
0.072 -0.055 0.339 8
0.089 -0.064 0.278 9
0.023 -0.007 0.111 8
-0.057 0.068 -0.066 9
-0.051 0.061 -0.059 6
-0.108 0.119 -0.159 10
-0.123 0.132 -0.177 9
-0.115 0.103 -0.136 8
-0.106 0.07 -0.064 9
-0.106 0.055 -0.007 8
-0.103 0.051 -0.003 8
-0.093 0.046 -0.003 9
-0.06 0.038 -0.044 8
0.0 0.019 -0.096 9
0.057 0.005 -0.134 8
0.096 0.008 -0.141 8
0.086 0.007 -0.127 7
0.072 0.029 0.02 10
0.065 0.026 0.018 8
0.036 0.032 0.184 9
0.019 0.03 0.271 8
0.01 0.024 0.24 9
0.003 0.017 0.113 8
0.005 0.007 -0.024 8
0.027 -0.013 -0.12 9
0.024 -0.011 -0.108 8
0.051 -0.024 -0.162 9
0.059 -0.025 -0.174 8
0.038 -0.022 -0.15 7
0.007 -0.009 -0.117 10
0.002 0.001 -0.088 8
0.002 0.001 -0.059 9
0.001 0.001 -0.053 8
0.058 -0.006 -0.026 8
0.076 -0.01 0.0 9
0.049 -0.009 0.031 8
0.006 -0.003 0.044 9
-0.013 0.005 0.055 8
-0.011 0.004 0.072 8
-0.007 0.004 0.065 9
0.007 0.004 0.054 6
0.023 -0.003 0.015 10
0.034 -0.012 -0.015 9
0.043 -0.014 -0.038 8
0.055 -0.017 -0.044 9
0.05 -0.03 -0.026 8
0.07 -0.027 -0.023 8
0.087 -0.038 -0.009 9
0.063 -0.028 0.004 8
0.009 0.0 0.065 9
-0.04 0.027 0.168 8
-0.064 0.052 0.253 8
-0.058 0.047 0.227 7
-0.042 0.06 0.262 10
0.004 0.053 0.246 9
0.072 0.036 0.214 8
0.129 0.026 0.204 8
0.139 0.019 0.236 9
0.101 0.013 0.265 8
0.091 0.011 0.238 9
0.031 0.013 0.214 8
-0.017 0.021 0.172 8
-0.049 0.027 0.092 9
-0.074 0.041 0.04 8
-0.088 0.055 0.05 7
-0.084 0.055 0.099 10
-0.075 0.049 0.089 8
-0.055 0.033 0.139 9
-0.017 0.016 0.166 8
0.024 0.004 0.163 8
0.035 -0.008 0.141 9
0.01 -0.012 0.107 8
-0.023 -0.005 0.058 9
-0.021 -0.004 0.052 8
-0.05 0.003 -0.009 8
-0.067 0.006 -0.099 9
-0.072 0.003 -0.201 7
-0.071 -0.011 -0.267 10
-0.063 -0.03 -0.292 8
-0.043 -0.038 -0.276 8
-0.039 -0.035 -0.248 9
-0.014 -0.042 -0.2 8
0.0 -0.042 -0.127 9
0.003 -0.03 -0.048 8
0.0 -0.015 0.002 8
-0.006 -0.003 0.034 9
-0.013 0.0 0.022 8
-0.012 0.0 0.02 9
-0.007 -0.004 -0.028 6
0.004 -0.012 -0.05 10
0.013 -0.021 0.0 9
0.009 -0.026 0.077 8
0.009 -0.022 0.101 8
0.014 -0.012 0.024 9
0.012 -0.011 0.021 8
0.026 -0.005 -0.099 9
0.045 -0.008 -0.184 8
0.038 0.001 -0.21 8
0.003 0.024 -0.191 9
-0.034 0.035 -0.158 8
-0.031 0.032 -0.142 7
-0.046 0.025 -0.105 10
-0.035 0.01 -0.076 8
-0.017 -0.001 -0.074 9
-0.016 -0.006 -0.075 8
-0.028 0.0 -0.069 9
-0.04 0.006 -0.067 8
-0.05 0.0 -0.074 8
-0.045 0.0 -0.067 9
-0.048 -0.01 -0.095 8
-0.043 -0.016 -0.13 9
-0.021 -0.019 -0.147 8
0.021 -0.022 -0.14 7
0.07 -0.021 -0.123 10
0.116 -0.024 -0.106 8
0.104 -0.022 -0.096 9
0.133 -0.037 -0.078 8
0.126 -0.047 -0.038 8
0.083 -0.03 0.001 9
0.025 0.0 0.014 8
-0.015 0.022 0.008 8
-0.03 0.023 -0.005 9
-0.027 0.021 -0.004 8
-0.024 0.01 0.0 9
-0.01 0.004 0.032 6
0.011 0.005 0.036 10
0.054 0.011 0.004 9
0.095 0.014 -0.004 8
0.086 0.015 0.025 9
0.078 0.014 0.023 8
0.028 0.019 0.057 8
-0.026 0.027 0.066 9
-0.059 0.029 0.068 8
-0.064 0.016 0.085 9
-0.045 -0.003 0.113 8
-0.024 -0.025 0.13 8
-0.021 -0.022 0.117 7
0.001 -0.047 0.108 10
0.01 -0.061 0.068 9
0.0 -0.073 0.026 8
-0.017 -0.073 -0.002 8
-0.044 -0.048 -0.01 9
-0.076 -0.023 -0.026 8
-0.069 -0.021 -0.024 9
-0.084 -0.006 -0.074 8
-0.065 -0.018 -0.121 8
-0.036 -0.048 -0.139 9
-0.01 -0.07 -0.139 8
0.014 -0.083 -0.123 7
0.027 -0.091 -0.086 10
0.024 -0.082 -0.077 8
0.024 -0.102 -0.016 9
0.016 -0.109 0.055 8
0.0 -0.093 0.088 8
-0.017 -0.092 0.066 9
-0.026 -0.119 0.046 8
-0.032 -0.128 0.026 9
-0.029 -0.115 0.023 8
-0.043 -0.071 -0.009 8
-0.05 -0.01 -0.014 9
-0.05 0.036 0.022 6
-0.046 0.065 0.038 11
-0.026 0.061 0.004 8
-0.006 0.036 -0.014 8
-0.006 0.032 -0.012 9
0.0 0.005 0.0 8
0.002 -0.018 0.005 9
0.014 -0.044 0.015 8
0.047 -0.055 0.118 8
0.081 -0.026 0.274 9
0.087 0.014 0.27 8
0.078 0.012 0.243 8
0.061 0.05 0.068 7
0.028 0.094 -0.13 10
-0.012 0.138 -0.335 9
-0.049 0.19 -0.513 8
-0.077 0.242 -0.536 8
-0.098 0.265 -0.404 9
-0.088 0.238 -0.363 8
-0.105 0.235 -0.209 9
-0.108 0.2 -0.104 8
-0.089 0.139 -0.019 8
-0.057 0.069 0.084 9
-0.013 0.016 0.178 8
-0.012 0.015 0.16 7
0.033 0.0 0.227 10
0.086 0.003 0.28 8
0.154 0.0 0.318 9
0.174 0.006 0.31 8
0.133 0.065 0.262 9
0.068 0.166 0.29 8
0.003 0.255 0.406 8
0.003 0.229 0.365 9
-0.034 0.298 0.499 8
-0.058 0.359 0.727 8
-0.088 0.434 1.033 9
-0.106 0.516 1.235 7
-0.092 0.569 1.288 10
-0.079 0.593 1.338 8
-0.071 0.534 1.204 8
-0.095 0.62 1.334 9
-0.163 0.787 1.47 8
-0.263 0.972 1.591 9
-0.361 1.114 1.718 8
-0.403 1.156 1.879 8
-0.39 1.112 2.049 9
-0.351 1.001 1.844 8
-0.302 0.899 1.984 9
-0.199 0.766 2.121 6
-0.072 0.638 2.263 10
0.027 0.455 2.319 9
0.114 0.246 2.382 8
0.177 0.091 2.537 9
0.159 0.082 2.283 8
0.172 -0.033 2.383 8
0.153 -0.15 2.31 9
0.131 -0.259 2.053 8
0.121 -0.319 1.58 9
0.114 -0.347 1.034 8
0.105 -0.37 0.48 8
0.094 -0.333 0.432 7
0.085 -0.384 -0.093 10
0.066 -0.452 -0.552 8
0.045 -0.518 -0.94 9
0.054 -0.539 -1.168 8
0.061 -0.508 -1.224 9
0.074 -0.53 -1.138 8
0.067 -0.477 -1.024 8
0.133 -0.548 -0.867 9
0.201 -0.599 -0.677 8
0.21 -0.648 -0.515 9
0.166 -0.681 -0.47 8
0.106 -0.723 -0.577 7
0.043 -0.784 -0.834 10
0.038 -0.705 -0.75 8
-0.026 -0.778 -1.054 9
-0.095 -0.847 -1.224 8
-0.153 -0.87 -1.256 8
-0.193 -0.817 -1.207 9
-0.198 -0.753 -1.021 8
-0.148 -0.738 -0.709 9
-0.133 -0.664 -0.638 8
-0.056 -0.732 -0.378 8
0.032 -0.882 -0.268 9
0.147 -1.079 -0.314 6
0.275 -1.305 -0.491 11
0.397 -1.48 -0.759 8
0.512 -1.535 -1.083 8
0.461 -1.382 -0.975 9
0.547 -1.391 -1.232 8
0.507 -1.317 -1.328 8
0.317 -1.137 -1.329 9
0.092 -0.906 -1.282 8
-0.086 -0.72 -1.223 9
-0.193 -0.664 -1.14 8
-0.174 -0.597 -1.026 8
-0.186 -0.638 -0.954 7
-0.11 -0.767 -0.942 10
0.03 -0.986 -0.986 9
0.158 -1.186 -1.053 8
0.204 -1.271 -1.063 8
0.171 -1.238 -0.998 9
0.154 -1.114 -0.898 8
0.08 -0.956 -0.85 9
-0.017 -0.635 -0.843 8
-0.071 -0.292 -0.859 8
-0.025 -0.095 -0.82 9
0.072 -0.034 -0.674 8
0.065 -0.031 -0.607 7
0.136 -0.007 -0.421 10
0.187 0.023 -0.243 8
0.243 0.022 -0.099 9
0.303 -0.044 -0.034 8
0.353 -0.125 -0.073 8
0.324 -0.162 -0.175 9
0.218 -0.113 -0.277 8
0.196 -0.102 -0.25 9
0.1 0.033 -0.307 8
0.03 0.213 -0.317 8
-0.021 0.402 -0.326 9
-0.02 0.575 -0.339 7
-0.072 0.674 -0.333 10
-0.181 0.706 -0.431 8
-0.163 0.636 -0.388 8
-0.185 0.69 -0.555 9
-0.179 0.741 -0.634 8
-0.21 0.759 -0.663 9
-0.242 0.769 -0.629 8
-0.245 0.758 -0.456 8
-0.216 0.709 -0.166 9
-0.194 0.638 -0.149 8
-0.146 0.574 0.187 9
-0.084 0.522 0.49 6
-0.045 0.477 0.616 10
-0.07 0.443 0.555 9
-0.13 0.438 0.376 8
-0.186 0.467 0.153 9
-0.167 0.421 0.137 8
-0.194 0.471 -0.061 8
-0.173 0.5 -0.182 9
-0.128 0.502 -0.166 8
-0.07 0.498 -0.039 8
-0.016 0.503 0.146 9
0.013 0.538 0.333 8
0.012 0.484 0.299 7
0.021 0.525 0.424 10
0.002 0.543 0.437 8
-0.011 0.545 0.315 9
-0.024 0.547 0.089 8
-0.043 0.565 -0.133 9
-0.065 0.597 -0.298 8
-0.058 0.537 -0.268 8
-0.076 0.568 -0.33 9
-0.084 0.568 -0.289 8
-0.09 0.542 -0.21 9
-0.084 0.499 -0.133 8
-0.076 0.449 -0.12 7
-0.076 0.402 0.146 10
-0.068 0.362 0.131 8
-0.077 0.35 0.275 9
-0.078 0.345 0.312 8
-0.008 0.321 0.095 8
0.128 0.233 0.013 9
0.211 0.135 0.198 8
0.15 0.15 0.234 9
0.135 0.135 0.211 8
0.016 0.274 0.149 8
-0.029 0.356 0.112 9
0.017 0.282 0.177 6
0.096 0.187 0.28 10
0.139 0.148 0.357 9
0.152 0.142 0.383 8
0.137 0.128 0.345 9
0.136 0.113 0.32 8
0.124 0.095 0.215 8
0.095 0.086 0.003 9
0.081 0.079 -0.228 8
0.11 0.049 -0.368 9
0.146 0.0 -0.405 8
0.131 0.0 -0.364 8
0.14 -0.034 -0.33 7
0.102 -0.045 -0.274 10
0.002 -0.038 -0.229 9
-0.109 -0.028 -0.207 8
-0.167 -0.027 -0.188 8
-0.15 -0.057 -0.18 9
-0.135 -0.051 -0.162 8
-0.145 -0.06 -0.165 9
-0.068 -0.038 -0.142 8
-0.028 -0.036 -0.077 8
-0.034 -0.022 0.043 9
-0.014 0.008 0.192 8
-0.013 0.007 0.172 7
0.007 0.025 0.276 10
-0.015 0.023 0.319 8
-0.042 0.019 0.321 9
-0.036 0.021 0.261 8
-0.002 0.005 0.122 8
0.039 -0.032 -0.024 9
0.035 -0.028 -0.106 8
0.046 -0.045 -0.096 9
0.016 -0.032 -0.145 8
-0.024 -0.008 -0.177 8
-0.051 0.014 -0.178 9
-0.071 0.028 -0.126 7
-0.076 0.034 -0.031 10
-0.068 0.03 -0.028 8
-0.061 0.027 0.08 8
-0.044 0.016 0.141 9
0.001 0.002 0.104 8
0.069 -0.01 0.005 9
0.13 -0.043 -0.082 8
0.164 -0.084 -0.126 8
0.148 -0.076 -0.114 9
0.132 -0.082 -0.112 8
0.05 -0.058 -0.076 8
-0.055 -0.021 -0.05 7
-0.128 0.024 -0.041 10
-0.161 0.054 -0.025 9
-0.156 0.069 0.011 8
-0.14 0.062 0.01 8
-0.108 0.067 0.052 9
-0.044 0.064 0.069 8
0.043 0.052 0.045 9
0.131 0.037 0.009 8
0.195 0.022 0.014 8
0.211 0.006 0.079 9
0.19 0.006 0.071 8
0.142 0.004 0.181 7
0.031 0.021 0.286 10
-0.088 0.053 0.322 8
-0.169 0.091 0.271 9
-0.199 0.111 0.152 8
-0.181 0.092 0.0 9
-0.163 0.083 0.0 8
-0.107 0.049 -0.126 8
-0.022 0.014 -0.199 9
0.058 -0.014 -0.226 8
0.075 -0.023 -0.192 9
0.019 -0.009 -0.063 8
0.017 -0.008 -0.056 7
-0.045 0.004 0.129 10
-0.056 -0.01 0.28 8
0.018 -0.041 0.33 9
0.161 -0.081 0.309 8
0.278 -0.116 0.273 8
0.312 -0.135 0.207 9
0.287 -0.133 0.125 8
0.258 -0.12 0.112 8
0.192 -0.116 0.093 9
0.106 -0.078 0.054 8
0.02 0.013 -0.118 9
-0.046 0.121 -0.322 6
-0.09 0.192 -0.426 10
-0.089 0.241 -0.443 9
-0.08 0.217 -0.399 8
-0.065 0.251 -0.358 9
-0.082 0.224 -0.244 8
-0.114 0.176 -0.034 8
-0.139 0.126 0.21 9
-0.156 0.067 0.378 8
-0.182 0.029 0.37 9
-0.164 0.026 0.333 8
-0.183 0.015 0.132 8
-0.172 0.01 -0.111 7
-0.14 -0.007 -0.252 10
-0.099 -0.034 -0.242 9
-0.074 -0.044 -0.122 8
-0.062 -0.031 0.02 8
-0.056 -0.028 0.018 9
-0.043 -0.013 0.142 8
-0.043 -0.008 0.204 8
-0.036 -0.023 0.175 9
0.021 -0.041 0.025 8
0.09 -0.063 -0.145 9
0.108 -0.098 -0.208 8
0.097 -0.089 -0.187 7
0.055 -0.089 -0.214 10
-0.012 -0.054 -0.252 8
-0.054 -0.022 -0.283 9
-0.062 -0.014 -0.28 8
-0.052 -0.037 -0.21 8
-0.037 -0.054 -0.084 9
-0.033 -0.049 -0.075 8
-0.02 -0.048 0.057 9
-0.007 -0.04 0.164 8
0.002 -0.03 0.225 8
0.015 -0.019 0.168 9
0.013 -0.017 0.025 6
0.105 -0.03 -0.078 11
0.094 -0.027 -0.07 8
0.134 -0.077 -0.121 8
0.14 -0.1 -0.096 9
0.087 -0.068 0.026 8
-0.01 -0.021 0.135 9
-0.091 0.006 0.146 8
-0.131 0.024 0.054 8
-0.118 0.022 0.049 9
-0.132 0.072 -0.078 8
-0.127 0.139 -0.149 8
-0.106 0.136 -0.127 7
-0.063 0.061 -0.018 10
-0.015 0.002 0.089 9
0.004 -0.006 0.109 8
0.004 -0.005 0.098 8
0.002 0.015 0.063 9
0.006 0.027 0.044 8
0.028 0.016 0.062 9
0.051 0.0 0.113 8
0.043 -0.008 0.164 8
0.038 -0.008 0.148 9
0.005 -0.011 0.165 8
-0.019 -0.014 0.113 7
-0.012 -0.016 0.017 10
0.021 -0.016 -0.049 8
0.058 -0.018 -0.075 9
0.06 -0.01 -0.085 8
0.054 -0.009 -0.076 9
0.033 0.006 -0.083 8
0.011 0.013 -0.107 8
0.0 0.001 -0.111 9
-0.004 -0.013 -0.041 8
-0.019 -0.019 0.071 9
-0.043 -0.012 0.139 8
-0.038 -0.011 0.125 7
-0.034 -0.013 0.148 10
0.009 -0.04 0.133 8
0.08 -0.065 0.034 8
0.158 -0.061 -0.087 9
0.215 -0.05 -0.133 8
0.213 -0.034 -0.089 9
0.191 -0.031 -0.08 8
0.114 0.005 -0.013 8
0.011 0.059 0.049 9
-0.058 0.096 0.121 8
-0.092 0.084 0.193 9
-0.105 0.058 0.211 6
-0.099 0.038 0.128 10
-0.089 0.034 0.115 9
-0.067 0.005 -0.02 8
-0.038 -0.028 -0.153 9
-0.021 -0.042 -0.249 8
-0.016 -0.032 -0.298 8
-0.011 -0.005 -0.293 9
-0.024 0.038 -0.241 8
-0.021 0.034 -0.217 9
-0.038 0.089 -0.143 8
-0.036 0.141 -0.06 8
-0.024 0.151 0.015 7
-0.014 0.109 0.041 10
-0.013 0.067 0.016 8
-0.009 0.045 -0.033 9
-0.008 0.04 -0.03 8
0.004 0.029 -0.087 9
0.0 0.008 -0.14 8
-0.008 -0.021 -0.178 8
-0.01 -0.049 -0.175 9
-0.007 -0.068 -0.143 8
0.015 -0.086 -0.091 9
0.013 -0.078 -0.082 8
0.041 -0.082 -0.006 7
0.028 -0.062 0.028 10
0.011 -0.034 -0.004 8
0.069 -0.035 -0.061 9
0.219 -0.08 -0.142 8
0.365 -0.149 -0.193 8
0.328 -0.134 -0.174 9
0.341 -0.16 -0.122 8
0.191 -0.111 0.067 9
0.013 -0.044 0.296 8
-0.108 -0.025 0.426 8
-0.176 -0.052 0.442 9
-0.158 -0.047 0.397 6
-0.191 -0.044 0.313 11
-0.219 0.024 0.126 8
-0.254 0.111 -0.075 8
-0.283 0.17 -0.185 9
-0.263 0.148 -0.184 8
-0.167 0.039 -0.175 8
0.017 -0.098 -0.172 9
0.015 -0.088 -0.154 8
0.161 -0.164 -0.065 9
0.102 -0.097 0.153 8
-0.021 0.037 0.415 8
-0.063 0.093 0.573 7
-0.066 0.094 0.608 10
-0.06 0.113 0.524 9
-0.054 0.102 0.472 8
-0.032 0.143 0.313 8
0.022 0.163 0.127 9
0.071 0.145 -0.058 8
0.076 0.111 -0.202 9
0.049 0.083 -0.292 8
0.015 0.066 -0.337 8
0.013 0.059 -0.303 9
-0.036 0.038 -0.298 8
-0.104 0.021 -0.252 7
# end
#Thu Feb 26 20:19:52 GMT+08:00 2015 
