# Supplementary material for: Abnormal Gait Behavior Detection for Elderly Based on Enhanced Wigner-Ville Analysis and Cloud Incremental SVM Learning
Source: Hindawi journal article supplement (doi:10.1155/2016/5869238), 2016-01-01
Supplement: f1 [file 5869238.f1.zip › Supplementary Materials/Original Data/Sitting on a chair then standing/original__19.txt]

# Accelerometer Values
# filename:  original__19.txt
# Saving start time: Thu Feb 26 20:19:54 GMT+08:00 2015

# sensor resolution: 0.0095825195m/s^2
#Sensorvendor: KIONIX, name: KX023 Accelerometer, type: 1,version : 1, range 39.240005

# X value, Y value, Z value, time diff in ms
-0.107 -0.027 0.015 9
-0.12 -0.027 0.122 8
-0.117 -0.018 0.209 7
-0.097 -0.018 0.25 10
-0.055 -0.031 0.253 8
-0.049 -0.028 0.227 9
0.021 -0.037 0.228 8
0.068 -0.067 0.267 8
0.042 -0.084 0.319 9
-0.016 -0.062 0.306 8
-0.056 -0.045 0.222 9
-0.05 -0.041 0.066 8
-0.049 -0.042 0.059 8
-0.023 -0.054 -0.108 9
-0.005 -0.055 -0.201 6
-0.015 -0.042 -0.235 10
-0.04 -0.014 -0.248 9
-0.052 0.003 -0.234 8
-0.047 0.002 -0.21 9
-0.045 -0.012 -0.139 8
-0.043 -0.042 -0.017 8
-0.042 -0.053 0.097 9
-0.03 -0.035 0.181 8
-0.02 -0.044 0.199 9
-0.011 -0.089 0.107 8
-0.01 -0.08 0.096 8
0.015 -0.099 0.022 7
0.058 -0.1 0.049 10
0.1 -0.121 0.074 9
0.112 -0.116 -0.005 8
0.128 -0.067 -0.158 8
0.151 -0.074 -0.265 9
0.136 -0.067 -0.238 8
0.139 -0.148 -0.274 9
0.133 -0.206 -0.279 8
0.122 -0.235 -0.283 8
0.084 -0.284 -0.325 9
0.169 -0.328 -0.318 8
0.152 -0.295 -0.286 7
0.197 -0.32 -0.239 10
0.102 -0.312 -0.224 8
0.035 -0.271 -0.191 9
-0.002 -0.259 -0.146 8
0.0 -0.303 -0.103 8
-0.005 -0.365 -0.084 9
-0.007 -0.399 -0.125 8
-0.006 -0.359 -0.113 9
0.028 -0.38 -0.222 8
0.095 -0.394 -0.325 8
0.161 -0.399 -0.328 9
0.215 -0.391 -0.202 7
0.247 -0.377 -0.024 10
0.222 -0.363 0.112 8
0.2 -0.326 0.101 8
0.118 -0.318 0.168 9
-0.036 -0.329 0.11 8
-0.092 -0.341 0.023 9
-0.085 -0.342 -0.08 8
-0.149 -0.365 -0.156 8
-0.168 -0.412 -0.149 9
-0.151 -0.37 -0.134 8
-0.144 -0.38 -0.22 9
-0.132 -0.347 -0.391 6
-0.107 -0.32 -0.556 10
-0.087 -0.301 -0.631 9
-0.106 -0.283 -0.543 8
-0.15 -0.277 -0.31 9
-0.135 -0.249 -0.279 8
-0.167 -0.265 0.021 8
-0.181 -0.318 0.359 9
-0.181 -0.379 0.709 8
-0.166 -0.423 0.959 8
-0.145 -0.439 1.084 9
-0.117 -0.395 1.079 8
-0.105 -0.355 0.971 7
-0.051 -0.295 0.837 10
0.053 -0.258 0.555 8
0.185 -0.286 0.189 9
0.31 -0.366 -0.085 8
0.369 -0.429 -0.194 9
0.356 -0.43 -0.152 8
0.32 -0.387 -0.137 8
0.289 -0.322 0.067 9
0.236 -0.192 0.347 8
0.159 -0.026 0.527 9
0.078 0.117 0.576 8
0.07 0.238 0.528 7
0.011 0.321 0.374 10
0.01 0.289 0.336 8
0.016 0.354 0.122 8
0.005 0.44 -0.045 9
-0.022 0.522 -0.09 8
-0.049 0.618 -0.001 9
-0.082 0.756 0.174 8
-0.128 0.924 0.321 8
-0.115 0.832 0.289 9
-0.152 0.979 0.361 8
-0.139 1.043 0.395 9
-0.142 1.036 0.427 6
-0.12 1.08 0.561 10
-0.128 1.168 0.774 9
-0.191 1.196 0.932 8
-0.172 1.076 0.839 9
-0.178 1.084 0.917 8
-0.164 1.098 0.89 8
-0.141 1.111 0.774 9
-0.104 1.092 0.618 8
-0.073 1.045 0.496 9
-0.066 0.94 0.433 8
-0.051 0.846 0.39 8
-0.033 0.909 0.379 7
-0.006 0.936 0.416 10
0.025 0.92 0.545 9
0.047 0.867 0.783 8
0.064 0.81 1.064 8
0.058 0.729 0.957 9
0.098 0.695 1.209 8
0.113 0.674 1.416 9
0.076 0.588 1.506 8
0.091 0.424 1.356 8
0.164 0.251 0.98 9
0.202 0.127 0.469 8
0.182 0.115 0.422 7
0.172 0.048 -0.053 10
0.135 0.017 -0.411 8
0.056 0.004 -0.622 9
-0.085 0.007 -0.672 8
-0.231 0.031 -0.706 8
-0.287 0.036 -0.809 9
-0.258 0.032 -0.728 8
-0.283 0.007 -0.898 9
-0.248 -0.014 -1.081 8
-0.205 -0.018 -1.382 8
-0.206 -0.014 -1.856 9
-0.187 0.026 -2.279 7
-0.144 0.148 -2.451 10
-0.13 0.133 -2.206 8
-0.143 0.349 -2.175 8
-0.29 0.594 -2.076 9
-0.469 0.748 -1.93 8
-0.505 0.782 -1.702 9
-0.328 0.746 -1.285 8
-0.104 0.653 -0.638 8
-0.093 0.588 -0.575 9
0.021 0.503 0.059 8
0.017 0.427 0.461 8
-0.028 0.24 0.542 7
-0.059 -0.044 0.377 10
-0.12 -0.29 0.132 9
-0.235 -0.419 -0.128 8
-0.211 -0.377 -0.115 8
-0.355 -0.417 -0.43 9
-0.514 -0.404 -0.742 8
-0.605 -0.367 -0.928 9
-0.54 -0.315 -0.969 8
-0.361 -0.235 -0.915 8
-0.256 -0.154 -0.771 9
-0.23 -0.139 -0.694 8
-0.221 -0.144 -0.503 7
-0.182 -0.202 -0.356 10
-0.125 -0.227 -0.287 8
-0.054 -0.229 -0.245 9
0.066 -0.235 -0.218 8
0.218 -0.266 -0.185 9
0.197 -0.239 -0.166 8
0.318 -0.28 -0.118 8
0.382 -0.295 -0.06 9
0.403 -0.285 -0.018 8
0.391 -0.281 -0.032 8
0.334 -0.261 -0.099 9
0.301 -0.235 -0.089 7
0.186 -0.191 -0.108 10
0.012 -0.126 -0.101 8
-0.145 -0.067 -0.186 8
-0.225 -0.028 -0.294 9
-0.233 0.006 -0.343 8
-0.164 0.024 -0.337 9
-0.014 -0.012 -0.269 8
-0.013 -0.011 -0.242 8
0.175 -0.103 -0.094 9
0.332 -0.147 0.071 8
0.41 -0.138 0.267 9
0.412 -0.13 0.512 6
0.356 -0.121 0.717 10
0.26 -0.134 0.849 9
0.234 -0.12 0.764 8
0.151 -0.155 0.835 9
0.104 -0.229 0.803 8
0.1 -0.34 0.648 8
0.145 -0.442 0.465 9
0.274 -0.513 0.314 8
0.308 -0.597 0.088 9
0.277 -0.538 0.079 8
0.293 -0.625 -0.141 8
0.394 -0.707 -0.197 7
0.41 -0.802 -0.143 10
0.356 -0.863 -0.089 9
0.269 -0.863 -0.108 8
0.242 -0.797 -0.13 8
0.155 -0.717 -0.117 9
0.084 -0.594 -0.178 8
0.076 -0.431 -0.357 8
0.124 -0.29 -0.516 9
0.155 -0.239 -0.568 8
0.175 -0.204 -0.532 9
0.158 -0.184 -0.478 8
0.167 -0.093 -0.34 7
0.139 -0.006 -0.185 10
0.106 0.044 -0.118 8
0.023 0.041 -0.075 9
-0.108 0.067 0.012 8
-0.222 0.125 0.18 8
-0.2 0.112 0.162 9
-0.258 0.135 0.383 8
-0.233 0.115 0.543 9
-0.126 0.062 0.604 8
-0.028 0.024 0.568 8
0.02 0.027 0.51 9
0.018 0.024 0.459 6
0.037 0.053 0.417 11
0.002 0.077 0.369 8
-0.073 0.098 0.331 8
-0.17 0.14 0.336 9
-0.265 0.21 0.391 8
-0.326 0.285 0.45 8
-0.319 0.298 0.487 9
-0.287 0.268 0.438 8
-0.22 0.214 0.469 9
-0.128 0.132 0.483 8
-0.066 0.075 0.459 8
-0.053 0.074 0.402 7
-0.07 0.105 0.363 10
-0.093 0.127 0.353 9
-0.084 0.115 0.318 8
-0.106 0.116 0.326 8
-0.119 0.092 0.359 9
-0.111 0.047 0.405 8
-0.093 0.006 0.437 9
-0.076 -0.016 0.442 8
-0.064 -0.038 0.438 8
-0.057 -0.034 0.394 9
-0.046 -0.062 0.373 8
-0.02 -0.075 0.299 7
0.015 -0.072 0.159 10
0.043 -0.066 -0.009 8
0.058 -0.06 -0.143 9
0.054 -0.043 -0.197 8
0.049 -0.039 -0.177 8
0.021 -0.003 -0.168 9
-0.007 0.033 -0.125 8
-0.007 0.02 -0.083 9
0.019 -0.021 -0.091 8
0.051 -0.057 -0.095 8
0.066 -0.069 -0.063 9
0.06 -0.062 -0.057 7
0.058 -0.044 -0.052 10
0.051 -0.021 -0.093 8
0.043 -0.008 -0.151 8
0.031 0.005 -0.174 9
0.023 0.017 -0.15 8
0.018 0.02 -0.093 9
0.016 0.018 -0.084 8
0.005 0.019 -0.03 8
-0.004 0.017 -0.015 9
-0.003 0.007 -0.026 8
0.005 -0.002 -0.087 9
0.004 -0.001 -0.078 6
0.007 0.044 -0.232 10
0.006 0.04 -0.208 9
0.003 0.073 -0.212 8
0.014 0.083 -0.182 9
0.029 0.069 -0.139 8
0.034 0.043 -0.115 8
0.034 0.017 -0.127 9
0.026 0.0 -0.16 8
0.024 0.0 -0.144 9
0.016 -0.019 -0.171 8
0.01 -0.035 -0.186 8
0.003 -0.051 -0.188 7
-0.002 -0.063 -0.181 10
-0.004 -0.062 -0.18 8
-0.004 -0.056 -0.162 9
0.001 -0.04 -0.167 8
0.008 -0.017 -0.153 9
0.026 0.001 -0.128 8
0.058 0.009 -0.124 8
0.08 0.007 -0.125 9
0.098 -0.006 -0.107 8
0.088 -0.005 -0.096 9
0.111 -0.022 -0.069 8
0.129 -0.039 -0.05 7
0.122 -0.054 -0.056 10
0.092 -0.057 -0.074 8
0.048 -0.049 -0.082 9
0.012 -0.034 -0.092 8
0.011 -0.03 -0.083 8
0.012 -0.017 -0.106 9
0.047 -0.011 -0.111 8
0.1 -0.008 -0.083 9
0.134 -0.009 -0.033 8
0.142 -0.007 0.003 8
0.142 -0.005 0.027 9
0.128 -0.005 0.024 6
0.118 -0.006 0.032 10
0.08 -0.007 0.023 9
0.029 -0.004 0.014 8
0.0 -0.004 0.017 9
0.004 -0.001 0.04 8
0.007 0.018 0.078 8
0.007 0.016 0.07 9
-0.017 0.045 0.076 8
-0.046 0.066 0.055 9
-0.049 0.049 0.041 8
-0.024 0.009 0.034 8
-0.009 -0.02 0.013 7
-0.033 -0.03 -0.072 10
-0.03 -0.027 -0.065 9
-0.058 -0.019 -0.237 8
-0.072 0.0 -0.451 8
-0.068 0.004 -0.636 9
-0.049 -0.01 -0.741 8
-0.046 -0.021 -0.774 9
-0.045 -0.022 -0.778 8
-0.04 -0.019 -0.7 8
-0.037 -0.024 -0.684 9
-0.036 -0.037 -0.622 8
-0.03 -0.046 -0.495 7
-0.029 -0.05 -0.297 10
-0.016 -0.037 -0.061 8
0.038 -0.01 0.181 9
0.034 -0.009 0.163 8
0.136 0.027 0.329 8
0.123 0.063 0.285 9
0.081 0.121 0.208 8
0.108 0.165 0.205 9
0.093 0.166 0.174 8
0.054 0.134 0.104 8
0.049 0.121 0.093 9
-0.001 0.063 0.02 7
-0.034 0.02 0.028 10
-0.058 -0.001 0.089 8
-0.051 -0.027 0.156 8
-0.018 -0.054 0.249 9
0.019 -0.058 0.346 8
0.017 -0.052 0.312 9
0.03 -0.04 0.388 8
0.004 -0.041 0.481 8
-0.032 -0.046 0.591 9
-0.064 -0.046 0.638 8
-0.069 -0.048 0.612 9
-0.062 -0.044 0.551 6
-0.045 -0.061 0.517 10
-0.025 -0.075 0.332 9
0.054 -0.086 0.155 8
0.149 -0.186 0.208 8
0.1 -0.228 0.296 9
-0.067 -0.052 0.26 8
-0.229 0.14 0.135 9
-0.206 0.126 0.121 8
-0.295 0.154 0.125 8
-0.307 0.078 0.273 9
-0.274 0.021 0.439 8
-0.212 -0.001 0.559 7
-0.124 -0.009 0.637 10
-0.005 -0.024 0.678 8
-0.004 -0.022 0.61 9
0.12 -0.049 0.563 8
0.214 -0.063 0.389 9
0.248 -0.054 0.052 8
0.252 -0.064 -0.304 8
0.227 -0.115 -0.481 9
0.13 -0.143 -0.522 8
0.117 -0.129 -0.47 9
-0.02 -0.09 -0.45 8
-0.15 -0.026 -0.397 7
-0.247 0.005 -0.338 10
-0.275 0.007 -0.295 8
-0.218 0.002 -0.264 9
-0.117 -0.006 -0.228 8
-0.105 -0.005 -0.205 8
-0.01 -0.001 -0.127 9
0.056 0.015 0.037 8
0.091 0.034 0.261 8
0.089 0.045 0.461 9
0.064 0.05 0.616 8
0.057 0.05 0.766 9
0.051 0.045 0.689 6
0.016 0.034 0.827 10
0.008 0.006 0.907 9
-0.015 -0.015 0.828 8
-0.03 -0.015 0.569 9
-0.035 -0.007 0.247 8
-0.031 -0.006 0.222 8
-0.039 0.002 0.2 9
-0.042 0.016 -0.482 8
-0.045 0.03 -0.615 9
-0.049 0.039 -0.539 8
-0.056 0.031 -0.267 8
-0.05 0.028 -0.24 7
-0.061 -0.015 0.043 10
-0.066 -0.103 0.193 9
-0.059 -0.178 0.234 8
-0.036 -0.163 0.126 8
-0.004 -0.086 -0.161 9
0.005 -0.014 -0.517 8
-0.008 0.027 -0.845 9
-0.007 0.025 -0.761 8
-0.02 0.042 -0.987 8
-0.035 0.056 -0.986 9
-0.083 0.07 -0.75 8
-0.134 0.091 -0.447 7
-0.151 0.136 -0.217 10
-0.154 0.188 -0.044 8
-0.139 0.169 -0.04 9
-0.116 0.176 0.024 8
-0.048 0.126 -0.022 8
0.04 0.064 -0.077 9
0.124 0.022 -0.076 8
0.172 0.002 -0.004 9
0.155 0.021 0.073 8
0.139 0.019 0.065 8
0.094 0.097 0.174 9
0.053 0.197 0.361 6
0.039 0.29 0.537 11
0.075 0.387 0.648 8
0.14 0.473 0.797 8
0.209 0.529 1.068 9
0.188 0.476 0.962 8
0.203 0.495 1.343 9
0.131 0.496 1.746 8
0.029 0.513 1.993 8
-0.071 0.607 1.98 9
-0.174 0.784 1.767 8
-0.27 0.969 1.421 8
-0.243 0.872 1.279 7
-0.291 1.011 0.975 10
-0.25 1.053 0.898 9
-0.163 0.987 1.082 8
-0.082 0.778 1.485 8
-0.021 0.513 2.003 9
0.005 0.276 2.428 8
0.004 0.248 2.185 9
-0.039 0.063 2.531 8
-0.153 -0.025 2.739 8
-0.239 -0.002 2.62 9
-0.295 0.057 2.201 8
-0.338 0.11 1.743 7
-0.379 0.177 1.273 10
-0.341 0.16 1.146 8
-0.344 0.216 0.628 9
-0.249 0.202 0.112 8
-0.096 0.102 -0.346 9
0.053 -0.066 -0.645 8
0.145 -0.226 -0.8 8
0.191 -0.315 -0.855 9
0.172 -0.283 -0.769 8
0.19 -0.344 -0.741 8
0.175 -0.386 -0.676 9
0.141 -0.399 -0.664 7
0.121 -0.401 -0.778 10
0.132 -0.421 -1.007 8
0.17 -0.472 -1.203 8
0.153 -0.425 -1.083 9
0.2 -0.531 -1.157 8
0.216 -0.668 -1.139 9
0.175 -0.756 -1.097 8
0.079 -0.788 -1.116 8
-0.032 -0.853 -1.145 9
-0.107 -0.988 -1.098 8
-0.096 -0.889 -0.988 9
-0.156 -1.027 -0.89 6
-0.23 -1.105 -0.792 10
-0.279 -1.131 -0.819 9
-0.243 -1.137 -0.979 8
-0.125 -1.177 -1.141 9
-0.003 -1.25 -1.276 8
-0.003 -1.125 -1.148 8
0.081 -1.218 -1.303 9
0.132 -1.335 -1.402 8
0.167 -1.436 -1.34 9
0.181 -1.45 -1.071 8
0.15 -1.384 -0.731 8
0.135 -1.246 -0.658 7
0.073 -1.15 -0.43 10
0.045 -1.051 -0.35 9
0.073 -0.963 -0.489 8
0.115 -0.88 -0.778 8
0.131 -0.796 -1.08 9
0.098 -0.713 -1.335 8
0.034 -0.641 -1.494 8
0.031 -0.577 -1.345 9
-0.024 -0.52 -1.42 8
-0.055 -0.484 -1.341 9
-0.063 -0.465 -1.093 8
-0.03 -0.44 -0.741 7
0.066 -0.412 -0.418 10
0.208 -0.356 -0.228 8
0.187 -0.32 -0.205 9
0.311 -0.25 -0.167 8
0.356 -0.199 -0.288 8
0.335 -0.158 -0.48 9
0.276 -0.125 -0.629 8
0.192 -0.107 -0.709 9
0.119 -0.096 -0.693 8
0.107 -0.086 -0.624 8
0.077 -0.052 -0.521 9
0.092 0.023 -0.405 6
0.139 0.139 -0.313 11
0.208 0.263 -0.244 8
0.265 0.354 -0.185 8
0.239 0.427 -0.127 9
0.215 0.384 -0.114 8
0.091 0.472 -0.083 8
-0.044 0.523 -0.113 9
-0.111 0.52 -0.161 8
-0.131 0.509 -0.147 9
-0.172 0.543 -0.087 8
-0.217 0.607 -0.067 8
-0.195 0.546 -0.06 7
-0.188 0.578 -0.114 10
-0.148 0.571 -0.18 9
-0.117 0.575 -0.185 8
-0.104 0.614 -0.071 8
-0.119 0.653 0.105 9
-0.127 0.658 0.23 8
-0.114 0.592 0.207 9
-0.114 0.584 0.287 8
-0.122 0.574 0.363 8
-0.126 0.567 0.418 9
-0.112 0.559 0.443 8
-0.095 0.565 0.442 7
-0.087 0.606 0.43 10
-0.078 0.546 0.387 8
-0.076 0.591 0.392 9
-0.066 0.604 0.398 8
-0.041 0.58 0.358 8
-0.016 0.535 0.279 9
-0.016 0.515 0.212 8
-0.033 0.515 0.166 9
-0.03 0.464 0.149 8
-0.031 0.46 0.108 8
0.004 0.434 0.065 9
0.062 0.396 0.025 7
0.111 0.358 0.0 10
0.14 0.328 -0.01 8
0.175 0.303 -0.038 8
0.157 0.273 -0.034 9
0.181 0.253 -0.083 8
0.166 0.238 -0.158 9
0.106 0.235 -0.257 8
0.02 0.252 -0.346 8
-0.054 0.284 -0.392 9
-0.104 0.313 -0.392 8
-0.094 0.282 -0.352 9
-0.122 0.285 -0.315 6
-0.115 0.253 -0.226 10
-0.083 0.19 -0.052 9
-0.059 0.128 0.158 8
-0.055 0.112 0.351 9
-0.068 0.126 0.512 8
-0.061 0.114 0.461 8
-0.068 0.116 0.537 9
-0.064 0.105 0.557 8
-0.068 0.109 0.527 8
-0.067 0.123 0.393 9
-0.056 0.13 0.223 8
-0.05 0.117 0.201 7
-0.029 0.109 0.039 10
0.001 0.085 -0.099 8
0.043 0.049 -0.187 9
0.091 0.009 -0.211 8
0.114 -0.02 -0.158 9
0.105 -0.038 -0.07 8
0.095 -0.034 -0.063 8
0.07 -0.037 -0.057 9
0.041 -0.023 0.069 8
0.013 -0.011 0.137 9
-0.006 -0.002 0.214 8
-0.023 0.005 0.284 7
-0.049 0.011 0.313 10
-0.044 0.01 0.281 8
-0.087 0.025 0.253 9
-0.116 0.039 0.141 8
-0.094 0.03 0.071 8
-0.039 -0.002 0.008 9
0.003 -0.029 -0.036 8
0.018 -0.035 -0.057 9
0.016 -0.032 -0.051 8
0.022 -0.036 -0.052 8
0.01 -0.044 -0.05 9
-0.023 -0.045 -0.063 6
-0.058 -0.016 -0.065 10
-0.086 0.0 -0.049 9
-0.096 -0.009 -0.031 8
-0.086 -0.008 -0.028 9
-0.072 -0.005 0.003 8
-0.041 -0.014 0.073 8
0.015 -0.048 0.166 9
0.082 -0.084 0.189 8
0.127 -0.122 0.165 9
0.102 -0.102 0.091 8
0.092 -0.092 0.082 8
0.018 0.018 -0.022 7
-0.001 0.08 -0.063 10
0.067 0.059 -0.044 9
0.155 0.024 0.044 8
0.193 -0.002 0.187 8
0.171 0.006 0.339 9
0.154 0.005 0.305 8
0.089 0.036 0.445 9
0.01 0.081 0.53 8
-0.019 0.076 0.497 8
0.029 -0.005 0.294 9
0.07 -0.071 -0.024 8
0.063 -0.064 -0.021 7
0.016 -0.075 -0.37 10
-0.08 -0.034 -0.657 8
-0.162 0.003 -0.789 9
-0.199 0.002 -0.778 8
-0.18 -0.021 -0.645 8
# end
#Thu Feb 26 20:19:59 GMT+08:00 2015.
