# Supplementary material for: Abnormal Gait Behavior Detection for Elderly Based on Enhanced Wigner-Ville Analysis and Cloud Incremental SVM Learning
Source: Hindawi journal article supplement (doi:10.1155/2016/5869238), 2016-01-01
Supplement: f1 [file 5869238.f1.zip › Supplementary Materials/Original Data/Sitting on a chair then standing/original__20.txt]

# Accelerometer Values
# filename:  original__20.txt
# Saving start time: Thu Feb 26 20:20:01 GMT+08:00 2015

# sensor resolution: 0.0095825195m/s^2
#Sensorvendor: KIONIX, name: KX023 Accelerometer, type: 1,version : 1, range 39.240005

# X value, Y value, Z value, time diff in ms
-0.044 -0.015 0.023 9
-0.04 -0.013 0.02 8
-0.025 -0.03 0.123 9
-0.017 -0.037 0.175 8
-0.011 -0.047 0.136 8
0.0 -0.06 0.046 7
0.01 -0.057 -0.022 10
0.011 -0.052 -0.063 9
0.01 -0.047 -0.057 8
0.014 -0.043 -0.086 8
0.018 -0.031 -0.106 9
0.011 -0.014 -0.107 8
-0.004 0.006 -0.077 9
-0.018 0.017 -0.023 8
-0.024 0.013 0.026 8
-0.021 0.012 0.023 9
-0.021 0.0 0.038 8
-0.015 -0.012 0.031 7
-0.014 -0.021 0.046 10
-0.027 -0.034 0.09 8
-0.043 -0.045 0.129 9
-0.046 -0.042 0.172 8
-0.041 -0.037 0.155 8
-0.026 -0.036 0.218 9
0.002 -0.052 0.259 8
0.033 -0.074 0.238 9
0.059 -0.1 0.145 8
0.06 -0.121 0.05 8
0.03 -0.12 0.028 9
0.027 -0.108 0.025 7
-0.018 -0.096 0.011 10
-0.064 -0.079 -0.034 8
-0.098 -0.053 -0.079 8
-0.111 -0.051 -0.126 9
-0.081 -0.106 -0.19 8
-0.026 -0.159 -0.229 9
-0.023 -0.143 -0.206 8
0.02 -0.168 -0.183 8
0.056 -0.215 -0.155 9
0.084 -0.289 -0.163 8
0.108 -0.362 -0.218 9
0.14 -0.405 -0.277 6
0.166 -0.417 -0.334 10
0.149 -0.376 -0.301 9
0.14 -0.379 -0.414 8
0.102 -0.38 -0.588 8
0.065 -0.375 -0.763 9
0.019 -0.375 -0.847 8
-0.023 -0.391 -0.847 9
-0.033 -0.393 -0.803 8
-0.03 -0.354 -0.722 8
-0.039 -0.341 -0.65 9
-0.066 -0.321 -0.479 8
-0.093 -0.309 -0.27 7
-0.115 -0.317 -0.162 10
-0.12 -0.333 -0.195 8
-0.096 -0.349 -0.309 9
-0.087 -0.314 -0.278 8
-0.042 -0.342 -0.362 9
0.01 -0.395 -0.392 8
0.071 -0.491 -0.385 8
0.101 -0.613 -0.339 9
0.079 -0.722 -0.176 8
0.024 -0.808 0.135 9
0.021 -0.727 0.122 8
-0.041 -0.763 0.428 7
-0.097 -0.751 0.612 10
-0.13 -0.733 0.673 8
-0.108 -0.722 0.641 9
-0.032 -0.721 0.551 8
0.066 -0.72 0.429 8
0.059 -0.648 0.386 9
0.127 -0.666 0.292 8
0.135 -0.697 0.292 8
0.097 -0.71 0.374 9
0.038 -0.668 0.538 8
-0.019 -0.542 0.769 9
-0.017 -0.488 0.692 6
-0.047 -0.382 0.896 10
-0.04 -0.365 0.988 9
-0.009 -0.352 0.971 8
0.043 -0.286 0.848 9
0.093 -0.195 0.578 8
0.108 -0.118 0.247 8
0.082 -0.011 0.026 9
0.074 -0.01 0.024 8
-0.035 0.227 -0.065 9
-0.132 0.529 0.049 8
-0.172 0.744 0.33 8
-0.233 0.847 0.58 7
-0.245 0.911 0.775 10
-0.193 0.988 0.828 9
-0.174 0.889 0.745 8
-0.103 0.968 0.611 8
-0.019 1.007 0.381 9
0.057 1.021 0.127 8
0.093 1.055 -0.076 8
0.105 1.112 -0.12 9
0.102 1.183 0.03 8
0.091 1.065 0.027 9
0.07 1.171 0.303 8
0.049 1.265 0.563 7
0.053 1.316 0.615 10
0.067 1.335 0.454 8
0.089 1.316 0.272 9
0.092 1.25 0.172 8
0.083 1.125 0.154 8
0.056 1.05 0.109 9
0.052 0.972 0.128 8
0.049 0.899 0.302 9
0.009 0.887 0.599 8
-0.052 0.965 0.842 8
-0.089 1.07 0.99 9
-0.08 0.963 0.891 6
-0.067 1.002 0.969 11
-0.035 0.981 0.943 8
-0.025 0.971 0.851 8
-0.051 0.939 0.722 9
-0.015 0.922 0.706 8
0.033 0.926 0.829 9
0.029 0.833 0.746 8
0.032 0.791 0.842 8
0.066 0.721 0.828 9
0.119 0.648 0.719 8
0.169 0.562 0.608 8
0.152 0.505 0.547 7
0.252 0.332 0.243 10
0.227 0.299 0.219 9
0.278 0.191 -0.178 8
0.344 0.153 -0.637 8
0.36 0.171 -1.039 9
0.309 0.172 -1.408 8
0.222 0.169 -1.704 9
0.2 0.152 -1.533 8
0.169 0.141 -1.646 8
0.158 0.098 -1.53 9
0.078 -0.021 -1.323 8
0.004 -0.196 -1.093 7
-0.065 -0.373 -0.789 10
-0.12 -0.492 -0.438 8
-0.108 -0.443 -0.394 9
-0.146 -0.488 -0.137 8
-0.195 -0.476 -0.015 9
-0.262 -0.423 -0.022 8
-0.324 -0.368 -0.147 8
-0.346 -0.342 -0.361 9
-0.337 -0.334 -0.55 8
-0.303 -0.3 -0.495 8
-0.289 -0.308 -0.579 9
-0.24 -0.324 -0.581 7
-0.139 -0.373 -0.51 10
-0.029 -0.449 -0.333 8
0.009 -0.506 -0.146 8
-0.024 -0.521 -0.1 9
-0.022 -0.469 -0.09 8
-0.086 -0.436 -0.178 9
-0.165 -0.376 -0.286 8
-0.237 -0.301 -0.347 8
-0.266 -0.244 -0.373 9
-0.239 -0.217 -0.374 8
-0.159 -0.235 -0.333 9
-0.143 -0.212 -0.3 6
-0.047 -0.258 -0.255 10
0.023 -0.262 -0.225 9
0.057 -0.215 -0.227 8
0.061 -0.169 -0.301 9
0.049 -0.155 -0.439 8
0.034 -0.149 -0.533 8
0.03 -0.134 -0.48 9
-0.009 -0.128 -0.403 8
-0.076 -0.119 -0.213 9
-0.112 -0.144 -0.048 8
-0.125 -0.144 0.075 8
-0.144 -0.078 0.212 7
-0.129 -0.039 0.362 10
-0.116 -0.035 0.326 8
-0.044 -0.066 0.418 9
0.068 -0.2 0.383 8
0.194 -0.368 0.24 9
0.308 -0.497 0.087 8
0.374 -0.592 -0.006 8
0.394 -0.613 -0.085 9
0.354 -0.552 -0.077 8
0.369 -0.496 -0.184 9
0.394 -0.416 -0.323 8
0.457 -0.334 -0.446 7
0.517 -0.242 -0.473 10
0.474 -0.176 -0.507 8
0.406 -0.122 -0.564 9
0.365 -0.109 -0.507 8
0.296 -0.005 -0.456 8
0.178 0.136 -0.255 9
0.057 0.23 -0.02 8
-0.018 0.302 0.095 9
-0.016 0.384 0.132 8
0.014 0.467 0.152 8
0.012 0.42 0.137 9
0.027 0.493 0.138 6
0.016 0.522 0.053 11
-0.015 0.515 -0.118 8
-0.043 0.487 -0.279 8
-0.037 0.447 -0.456 9
0.0 0.385 -0.636 8
0.0 0.346 -0.573 8
0.038 0.254 -0.638 9
0.03 0.156 -0.557 8
-0.026 0.085 -0.438 9
-0.104 0.038 -0.373 8
-0.174 -0.008 -0.374 8
-0.156 -0.007 -0.336 7
-0.187 -0.072 -0.386 10
-0.154 -0.183 -0.43 9
-0.087 -0.335 -0.435 8
-0.024 -0.455 -0.387 8
0.034 -0.52 -0.266 9
0.074 -0.579 -0.089 8
0.075 -0.632 0.06 9
0.067 -0.569 0.054 8
0.042 -0.591 0.125 8
-0.01 -0.555 0.201 9
-0.103 -0.479 0.345 8
-0.196 -0.371 0.485 7
-0.252 -0.257 0.569 10
-0.227 -0.187 0.624 8
-0.242 -0.168 0.562 9
-0.222 -0.136 0.637 8
-0.179 -0.121 0.726 8
-0.128 -0.102 0.783 9
-0.079 -0.09 0.754 8
-0.017 -0.088 0.623 9
-0.016 -0.079 0.56 8
0.015 -0.09 0.504 8
-0.013 -0.09 0.205 9
-0.069 -0.06 0.072 7
-0.107 -0.028 -0.092 10
-0.1 -0.022 -0.281 8
-0.048 -0.028 -0.415 8
-0.043 -0.025 -0.373 9
0.022 -0.024 -0.422 8
0.058 -0.014 -0.365 9
0.054 -0.012 -0.222 8
0.037 -0.007 -0.103 8
0.031 0.012 -0.091 9
0.017 0.035 -0.127 8
0.016 0.031 -0.114 9
-0.021 0.06 -0.136 6
-0.07 0.1 -0.132 10
-0.101 0.119 -0.079 9
-0.09 0.096 0.031 8
-0.053 0.067 0.152 9
-0.022 0.056 0.251 8
-0.02 0.05 0.226 8
-0.016 0.059 0.311 9
-0.029 0.063 0.394 8
-0.038 0.058 0.472 8
-0.055 0.068 0.53 9
-0.081 0.086 0.546 8
-0.072 0.077 0.492 7
-0.093 0.09 0.46 10
-0.1 0.073 0.381 8
-0.094 0.029 0.276 9
-0.083 -0.012 0.149 8
-0.052 -0.054 0.038 9
-0.008 -0.089 -0.034 8
0.012 -0.095 -0.094 8
0.01 -0.085 -0.085 9
0.008 -0.073 -0.15 8
0.003 -0.061 -0.201 9
-0.007 -0.038 -0.193 8
-0.014 -0.013 -0.134 7
-0.007 -0.006 -0.079 10
-0.002 -0.013 -0.047 8
-0.002 -0.012 -0.042 9
-0.005 -0.019 -0.031 8
-0.002 -0.032 -0.053 8
0.013 -0.053 -0.118 9
0.041 -0.072 -0.245 8
0.06 -0.076 -0.382 8
0.065 -0.071 -0.452 9
0.059 -0.064 -0.407 8
0.055 -0.047 -0.39 9
0.039 -0.018 -0.31 6
0.008 0.013 -0.224 10
-0.025 0.05 -0.14 9
-0.042 0.068 -0.041 8
-0.028 0.057 0.065 9
-0.025 0.051 0.058 8
-0.008 0.033 0.139 8
-0.012 0.028 0.176 9
-0.03 0.042 0.176 8
-0.033 0.054 0.152 9
-0.005 0.054 0.112 8
0.036 0.044 0.071 8
0.032 0.039 0.064 7
0.07 0.026 0.051 10
0.087 0.024 0.078 9
0.069 0.032 0.111 8
0.044 0.04 0.134 8
0.045 0.039 0.133 9
0.086 0.021 0.098 8
0.077 0.019 0.088 9
0.132 -0.007 0.012 8
0.154 -0.032 -0.135 8
0.14 -0.039 -0.319 9
0.107 -0.027 -0.487 8
0.071 -0.009 -0.597 7
0.046 0.008 -0.591 10
0.042 0.007 -0.532 8
0.012 0.018 -0.451 9
-0.018 0.071 -0.329 8
-0.023 0.188 -0.179 8
-0.039 0.287 -0.036 9
-0.066 0.315 0.053 8
-0.084 0.3 0.131 9
-0.075 0.27 0.118 8
-0.086 0.234 0.173 8
-0.075 0.188 0.149 9
-0.049 0.149 0.061 6
-0.026 0.105 -0.072 11
-0.009 0.054 -0.196 8
-0.016 0.014 -0.24 8
-0.014 0.013 -0.216 9
-0.029 -0.013 -0.189 8
-0.036 -0.035 -0.095 9
-0.05 -0.046 0.063 8
-0.056 -0.067 0.191 8
-0.034 -0.12 0.256 9
-0.031 -0.108 0.284 8
0.007 -0.097 0.256 9
0.051 -0.209 0.198 6
0.099 -0.233 0.023 10
0.126 -0.245 -0.198 9
0.114 -0.24 -0.401 8
0.078 -0.218 -0.479 8
0.07 -0.196 -0.431 9
0.02 -0.19 -0.388 8
-0.031 -0.194 -0.299 9
-0.065 -0.186 -0.117 8
-0.097 -0.182 0.135 8
-0.12 -0.176 0.322 9
-0.105 -0.153 0.372 8
-0.094 -0.137 0.335 7
-0.065 -0.112 0.328 10
-0.038 -0.103 0.342 8
-0.002 -0.132 0.382 9
0.014 -0.184 0.436 8
0.011 -0.19 0.525 9
-0.013 -0.106 0.684 8
-0.012 -0.096 0.615 8
-0.096 0.048 0.795 9
-0.221 0.267 0.936 8
-0.292 0.492 1.1 9
-0.241 0.583 1.319 8
-0.091 0.547 1.482 7
0.077 0.512 1.508 10
0.07 0.461 1.357 8
0.189 0.505 1.314 9
0.211 0.574 1.358 8
0.15 0.627 1.584 8
0.046 0.75 1.925 9
-0.105 0.942 2.31 8
-0.268 1.093 2.65 8
-0.241 0.983 2.385 9
-0.368 1.046 2.566 8
-0.424 0.952 2.536 9
-0.408 0.767 2.395 6
-0.312 0.565 2.24 10
-0.111 0.359 2.143 9
0.128 0.157 2.127 8
0.115 0.141 1.914 9
0.288 -0.014 2.066 8
0.342 -0.098 2.325 8
0.29 -0.153 2.564 9
0.188 -0.18 2.629 8
0.081 -0.171 2.438 9
-0.013 -0.161 2.015 8
-0.011 -0.145 1.813 8
-0.076 -0.154 1.206 7
-0.105 -0.18 0.566 10
-0.12 -0.203 -0.002 9
-0.135 -0.216 -0.466 8
-0.124 -0.232 -0.784 8
-0.095 -0.259 -1.064 9
-0.085 -0.233 -0.958 8
-0.05 -0.276 -1.218 8
-0.013 -0.324 -1.358 9
0.006 -0.379 -1.386 8
0.016 -0.433 -1.397 9
0.029 -0.472 -1.437 8
0.026 -0.425 -1.294 7
0.041 -0.474 -1.337 10
0.05 -0.543 -1.397 8
0.058 -0.645 -1.5 9
0.079 -0.783 -1.56 8
0.092 -0.911 -1.566 8
0.081 -1.025 -1.531 9
0.072 -1.13 -1.492 8
0.065 -1.017 -1.343 9
0.106 -1.141 -1.312 8
0.17 -1.299 -1.164 8
0.235 -1.444 -0.932 9
0.282 -1.537 -0.718 6
0.266 -1.568 -0.569 11
0.22 -1.534 -0.517 8
0.198 -1.381 -0.465 8
0.174 -1.329 -0.557 9
0.159 -1.309 -0.766 8
0.12 -1.331 -0.981 9
0.038 -1.337 -1.105 8
-0.068 -1.274 -1.123 8
-0.19 -1.073 -1.141 9
-0.171 -0.966 -1.027 8
-0.287 -0.771 -1.042 8
-0.284 -0.749 -0.982 7
-0.183 -0.836 -0.954 10
-0.078 -0.917 -1.023 9
0.0 -0.895 -1.148 8
0.0 -0.806 -1.255 8
0.052 -0.725 -1.13 9
0.122 -0.516 -1.131 8
0.101 -0.404 -1.098 9
0.037 -0.311 -1.036 8
0.011 -0.142 -0.835 8
-0.034 0.015 -0.569 9
-0.03 0.013 -0.512 8
-0.026 0.11 -0.246 7
0.048 0.153 -0.051 10
0.151 0.168 0.039 8
0.241 0.175 0.037 9
0.331 0.231 -0.077 8
0.365 0.384 -0.241 8
0.328 0.345 -0.217 9
0.307 0.521 -0.363 8
0.364 0.648 -0.452 9
0.464 0.687 -0.462 8
0.51 0.639 -0.424 8
0.495 0.575 -0.342 9
0.445 0.518 -0.308 7
0.358 0.467 -0.203 10
0.236 0.432 -0.129 8
0.126 0.402 -0.117 8
0.032 0.374 -0.159 9
-0.054 0.406 -0.233 8
-0.183 0.47 -0.29 9
-0.306 0.497 -0.378 8
-0.275 0.447 -0.34 8
-0.318 0.439 -0.487 9
-0.3 0.429 -0.62 8
-0.275 0.452 -0.735 9
-0.284 0.52 -0.805 6
-0.313 0.596 -0.757 10
-0.342 0.634 -0.56 9
-0.308 0.57 -0.504 8
-0.336 0.585 -0.18 9
-0.345 0.596 0.155 8
-0.328 0.61 0.421 8
-0.29 0.605 0.578 9
-0.236 0.561 0.578 8
-0.18 0.482 0.493 9
-0.162 0.434 0.444 8
-0.122 0.353 0.405 8
-0.097 0.319 0.398 7
-0.059 0.332 0.334 10
-0.011 0.357 0.222 8
0.028 0.4 0.123 9
0.06 0.458 0.054 8
0.054 0.412 0.048 9
0.064 0.442 0.002 8
0.052 0.436 -0.014 8
0.022 0.421 0.018 9
-0.019 0.422 0.089 8
-0.052 0.433 0.121 9
-0.07 0.431 0.08 8
-0.063 0.388 0.072 7
-0.078 0.38 0.007 10
-0.089 0.366 -0.049 8
-0.107 0.338 -0.092 9
-0.125 0.309 -0.121 8
-0.12 0.283 -0.136 8
-0.095 0.24 -0.129 9
-0.085 0.216 -0.116 8
-0.069 0.18 -0.088 9
-0.055 0.158 -0.064 8
-0.03 0.139 -0.04 8
0.023 0.112 -0.135 9
0.08 0.042 -0.114 6
0.102 -0.033 0.044 10
0.092 -0.029 0.039 9
0.065 -0.004 0.054 8
0.012 0.112 0.019 9
-0.013 0.208 -0.037 8
-0.001 0.191 -0.07 8
0.029 0.13 -0.08 9
0.048 0.107 -0.083 8
0.043 0.096 -0.074 9
0.049 0.103 -0.056 8
0.056 0.112 -0.05 8
0.076 0.097 -0.107 7
0.103 0.051 -0.176 10
0.118 -0.005 -0.224 9
0.097 -0.023 -0.302 8
0.087 -0.02 -0.271 8
0.036 0.015 -0.389 9
-0.004 0.063 -0.492 8
-0.017 0.07 -0.515 9
0.02 0.031 -0.441 8
0.104 -0.014 -0.316 8
0.093 -0.012 -0.166 9
0.181 -0.011 -0.149 8
0.224 -0.053 -0.032 7
0.229 -0.066 0.078 10
0.18 -0.073 0.181 8
0.095 -0.064 0.208 9
0.015 -0.05 0.218 8
0.014 -0.045 0.196 8
-0.04 -0.048 0.209 9
-0.03 -0.111 0.232 8
0.0 -0.153 0.233 9
-0.022 -0.088 0.19 8
-0.085 0.014 0.128 8
-0.15 0.107 0.095 9
-0.135 0.097 0.086 7
-0.186 0.162 0.097 10
-0.21 0.184 0.126 8
-0.199 0.176 0.149 8
-0.151 0.152 0.15 9
-0.099 0.113 0.1 8
-0.059 0.075 -0.044 9
-0.053 0.067 -0.039 8
-0.041 0.073 -0.252 8
-0.065 0.155 -0.428 9
-0.104 0.253 -0.499 8
-0.139 0.312 -0.462 9
-0.147 0.317 -0.298 6
-0.109 0.232 -0.084 10
-0.098 0.209 -0.075 9
-0.028 0.084 0.067 8
0.04 -0.009 0.142 9
0.086 -0.056 0.194 8
0.101 -0.06 0.241 8
0.09 -0.025 0.267 9
0.088 0.018 0.267 8
0.079 0.016 0.24 8
0.119 0.029 0.216 9
0.184 0.002 0.183 8
0.222 -0.038 0.152 7
0.214 -0.074 0.128 10
0.17 -0.088 0.113 8
0.122 -0.089 0.105 9
0.11 -0.08 0.094 8
0.08 -0.084 0.084 9
0.059 -0.084 0.073 8
0.03 -0.08 0.075 8
-0.016 -0.082 0.089 9
-0.053 -0.073 0.111 8
-0.068 -0.041 0.134 9
-0.061 -0.037 0.121 8
-0.062 -0.019 0.151 7
-0.054 -0.022 0.16 10
-0.036 -0.025 0.133 8
0.001 -0.033 0.094 9
0.048 -0.037 0.054 8
0.084 -0.026 0.007 8
0.075 -0.023 0.006 9
0.098 -0.008 -0.019 8
0.095 0.001 -0.001 9
0.094 0.001 0.042 8
0.09 -0.013 0.053 8
0.04 -0.034 0.025 9
0.036 -0.031 0.023 6
-0.034 -0.03 0.005 10
-0.096 0.014 -0.017 9
-0.126 0.052 -0.045 8
-0.119 0.036 -0.057 9
-0.096 0.004 -0.043 8
-0.075 -0.017 -0.012 8
-0.055 -0.036 0.015 9
-0.05 -0.032 0.013 8
-0.033 -0.043 0.045 9
-0.026 -0.048 0.076 8
-0.03 -0.051 0.071 8
-0.039 -0.045 0.022 7
-0.045 -0.033 -0.045 10
-0.042 -0.022 -0.097 9
-0.038 -0.02 -0.087 8
-0.037 -0.008 -0.107 8
-0.049 0.0 -0.105 9
-0.061 0.002 -0.086 8
-0.051 -0.003 -0.056 8
-0.023 -0.015 -0.024 9
0.0 -0.026 0.0 8
0.0 -0.023 0.0 9
0.01 -0.027 0.026 8
0.003 -0.022 0.06 7
-0.025 0.015 0.088 10
-0.058 0.073 0.098 8
-0.064 0.083 0.097 9
-0.051 0.064 0.095 8
-0.046 0.058 0.086 8
-0.034 0.086 0.057 9
-0.013 0.091 0.029 8
0.02 0.03 0.045 9
0.047 -0.024 0.092 8
0.054 -0.04 0.132 8
0.028 -0.016 0.142 9
0.025 -0.015 0.127 7
-0.014 0.032 0.117 10
-0.03 0.068 0.076 8
-0.01 0.072 0.028 8
0.029 0.043 0.036 9
0.061 0.01 0.114 8
0.063 -0.005 0.216 9
0.057 -0.004 0.194 8
0.039 -0.02 0.262 8
0.022 -0.049 0.251 9
0.016 -0.081 0.139 8
-0.001 -0.092 -0.015 8
-0.041 -0.077 -0.14 7
-0.086 -0.059 -0.225 10
-0.078 -0.053 -0.202 9
-0.092 -0.043 -0.26 8
-0.07 -0.043 -0.261 8
-0.04 -0.043 -0.207 9
-0.022 -0.039 -0.136 8
# end
#Thu Feb 26 20:20:07 GMT+08:00 2015.
