# Supplementary material for: Abnormal Gait Behavior Detection for Elderly Based on Enhanced Wigner-Ville Analysis and Cloud Incremental SVM Learning
Source: Hindawi journal article supplement (doi:10.1155/2016/5869238), 2016-01-01
Supplement: f1 [file 5869238.f1.zip › Supplementary Materials/Original Data/Slipping against a wall ending in sitting position/original__162.txt]

# Accelerometer Values
# filename:  original__162.txt
# Saving start time: Thu Feb 26 20:44:36 GMT+08:00 2015

# sensor resolution: 0.0095825195m/s^2
#Sensorvendor: KIONIX, name: KX023 Accelerometer, type: 1,version : 1, range 39.240005

# X value, Y value, Z value, time diff in ms
-0.402 0.143 -0.289 8
-0.16 -0.107 -0.119 9
0.009 -0.258 0.07 8
0.068 -0.281 0.148 8
0.055 -0.232 0.147 9
-0.01 -0.207 0.121 8
-0.009 -0.184 0.07 9
-0.008 -0.165 0.063 8
-0.191 -0.137 -0.016 8
-0.272 -0.108 -0.101 9
-0.315 -0.084 -0.155 6
-0.309 -0.072 -0.183 11
-0.273 -0.062 -0.168 8
-0.246 -0.056 -0.151 8
-0.209 -0.048 -0.135 9
-0.188 -0.032 -0.176 8
-0.153 -0.018 -0.232 9
-0.076 -0.019 -0.247 8
0.015 -0.004 -0.232 8
0.095 0.051 -0.211 9
0.085 0.045 -0.19 8
0.144 0.125 -0.127 8
0.182 0.139 -0.002 7
0.211 0.068 0.1 10
0.236 0.01 0.152 9
0.241 -0.013 0.205 8
0.24 -0.04 0.229 8
0.216 -0.036 0.206 9
0.235 -0.055 0.167 8
0.278 -0.009 0.158 9
0.309 0.072 0.257 8
0.32 0.072 0.371 8
0.351 0.009 0.393 9
0.316 0.008 0.354 8
0.367 -0.036 0.296 7
0.391 -0.047 0.221 10
0.366 -0.048 0.227 8
0.269 -0.081 0.338 9
0.12 -0.15 0.467 8
-0.004 -0.191 0.545 8
-0.004 -0.171 0.49 9
-0.083 -0.151 0.484 8
-0.138 -0.115 0.438 9
-0.191 -0.088 0.394 8
-0.247 -0.076 0.345 8
-0.306 -0.07 0.302 9
-0.275 -0.063 0.271 7
-0.334 -0.061 0.237 10
-0.364 -0.061 0.176 8
-0.349 -0.059 0.102 8
-0.315 -0.049 0.048 9
-0.282 -0.022 -0.002 8
-0.258 0.015 -0.099 9
-0.232 0.048 -0.226 8
-0.209 0.043 -0.203 8
-0.239 0.088 -0.316 9
-0.216 0.132 -0.383 8
-0.161 0.127 -0.346 9
-0.106 0.077 -0.206 6
-0.051 0.021 -0.061 10
-0.046 0.019 -0.054 9
0.022 -0.017 0.005 8
0.086 -0.04 -0.052 9
0.114 -0.063 -0.221 8
0.117 -0.078 -0.444 8
0.107 -0.089 -0.554 9
0.064 -0.118 -0.498 8
0.057 -0.106 -0.448 8
0.006 -0.129 -0.402 9
-0.005 -0.12 -0.469 8
0.022 -0.139 -0.571 7
0.067 -0.206 -0.619 10
0.096 -0.282 -0.641 8
0.08 -0.361 -0.638 9
0.072 -0.325 -0.574 8
0.044 -0.367 -0.484 9
0.069 -0.32 -0.238 8
0.115 -0.267 -0.046 8
0.161 -0.327 -0.06 9
0.225 -0.491 -0.164 8
0.202 -0.441 -0.147 9
0.275 -0.633 -0.28 8
0.314 -0.862 -0.351 7
0.231 -1.096 -0.213 10
0.018 -1.27 0.194 8
-0.234 -1.447 0.665 9
-0.436 -1.593 0.95 8
-0.392 -1.434 0.855 8
-0.457 -1.45 0.864 9
-0.41 -1.393 0.654 8
-0.328 -1.381 0.264 9
-0.234 -1.401 -0.19 8
-0.143 -1.444 -0.53 8
-0.026 -1.574 -0.767 9
-0.023 -1.417 -0.69 6
0.072 -1.619 -0.839 11
0.08 -1.7 -0.866 8
-0.053 -1.493 -0.778 8
-0.333 -1.079 -0.587 9
-0.588 -0.721 -0.378 8
-0.678 -0.503 -0.293 8
-0.61 -0.452 -0.264 9
-0.564 -0.331 -0.29 8
-0.357 -0.265 -0.301 9
-0.044 -0.229 -0.21 8
0.243 -0.198 0.056 8
0.218 -0.179 0.051 7
0.479 -0.162 0.426 10
0.753 -0.204 0.669 9
1.005 -0.288 0.624 8
1.147 -0.319 0.315 8
1.136 -0.309 -0.004 9
0.901 -0.269 -0.146 8
0.427 -0.151 -0.16 9
0.384 -0.136 -0.144 8
-0.29 0.247 0.031 8
-1.063 0.911 0.561 9
-1.682 1.438 1.412 8
-1.972 1.538 2.349 7
-1.924 1.255 3.113 10
-1.669 0.875 3.447 8
-1.502 0.788 3.102 9
-1.167 0.548 2.844 8
-0.789 0.358 2.052 8
-0.466 0.254 1.02 9
-0.241 0.334 0.109 8
-0.121 0.547 -0.415 9
-0.146 0.789 -0.465 8
-0.132 0.71 -0.418 8
-0.339 0.87 -0.086 9
-0.579 0.869 0.412 7
-0.649 0.724 0.798 10
-0.519 0.517 0.943 8
-0.209 0.271 0.942 8
-0.188 0.244 0.86 9
0.23 0.219 0.774 8
0.66 -0.153 0.527 9
0.883 -0.291 -0.041 8
0.741 -0.352 -0.671 8
0.331 -0.16 -0.984 9
-0.13 0.265 -1.02 8
-0.117 0.239 -0.918 9
-0.429 0.901 -0.817 6
-0.479 1.714 -0.82 10
-0.179 2.427 -1.215 9
0.37 2.887 -1.822 8
1.011 3.037 -2.28 9
1.642 2.934 -2.506 8
1.478 2.641 -2.256 8
1.926 2.477 -2.082 9
2.047 2.196 -1.373 8
1.982 1.794 -0.453 8
1.88 1.444 0.3 9
1.784 1.159 0.787 8
1.606 1.043 0.709 7
1.341 0.573 0.739 10
0.932 0.163 0.477 8
0.832 0.266 0.109 9
1.097 0.791 -0.57 8
1.392 1.429 -1.267 9
1.723 1.594 -1.692 8
1.55 1.435 -1.523 8
2.053 0.915 -1.371 9
1.99 0.25 -1.48 8
1.106 -0.254 -0.208 9
-0.203 -0.474 1.943 8
-1.437 -0.481 3.98 7
-2.212 -0.52 5.474 10
-1.99 -0.468 4.926 8
-2.342 -0.552 5.506 9
-2.328 -0.696 5.282 8
-2.246 -0.841 4.812 8
-2.23 -0.995 4.175 9
-2.174 -1.19 3.544 8
-2.047 -1.505 3.254 8
-1.842 -1.354 2.929 9
-1.799 -1.921 3.016 8
-1.882 -2.61 3.374 9
-1.982 -3.285 3.688 6
-1.965 -3.886 3.67 10
-1.739 -4.146 3.148 9
-1.365 -3.955 2.018 8
-1.228 -3.56 1.816 9
-0.889 -3.15 0.468 8
-0.631 -2.694 -0.687 8
-0.451 -2.306 -1.501 9
-0.33 -2.041 -1.906 8
-0.295 -1.908 -1.859 9
-0.532 -1.83 -1.413 8
-0.479 -1.647 -1.272 8
-0.975 -1.566 -0.674 7
-1.404 -1.518 -0.263 10
-1.633 -1.522 -0.229 9
-1.646 -1.57 -0.474 8
-1.503 -1.571 -0.649 8
-1.352 -1.414 -0.584 9
-1.041 -1.231 -0.588 8
-0.589 -0.991 -0.578 9
-0.152 -0.816 -0.689 8
0.247 -0.59 -0.905 8
0.525 -0.255 -1.209 9
0.643 0.07 -1.472 8
0.578 0.063 -1.325 7
0.599 0.245 -1.253 10
0.572 0.261 -0.845 8
0.549 0.192 -0.358 9
0.607 0.131 -0.055 8
0.832 0.1 -0.086 8
1.08 0.117 -0.354 9
0.972 0.105 -0.319 8
1.077 0.227 -0.6 9
1.059 0.455 -0.823 8
0.969 0.722 -0.937 8
0.802 0.918 -0.719 9
0.722 0.826 -0.647 7
0.458 0.885 0.143 10
0.412 0.797 0.129 8
0.164 0.675 0.563 8
-0.108 0.509 0.824 9
-0.21 0.343 0.826 8
-0.036 0.171 0.548 9
0.345 -0.049 0.082 8
0.31 -0.044 0.074 8
0.764 -0.176 -0.466 9
1.197 -0.175 -0.873 8
1.539 -0.234 -1.039 9
1.802 -0.301 -1.152 6
1.912 -0.257 -1.304 10
1.832 -0.137 -1.463 9
1.649 -0.123 -1.317 8
1.455 0.094 -1.553 8
1.19 0.387 -1.865 9
0.964 0.695 -2.155 8
0.837 0.983 -2.405 9
0.822 1.093 -2.415 8
0.88 0.989 -2.106 8
0.792 0.89 -1.896 9
0.837 0.755 -1.52 8
0.817 0.656 -1.133 7
0.727 0.484 -0.733 10
0.569 0.257 -0.46 8
0.382 0.105 -0.347 9
0.207 0.032 -0.252 8
0.186 0.029 -0.227 9
0.081 -0.058 -0.13 8
0.073 -0.208 -0.038 8
0.115 -0.319 0.086 9
0.096 -0.323 0.234 8
-0.006 -0.349 0.398 8
-0.005 -0.314 0.358 9
-0.053 -0.296 0.366 7
-0.058 -0.131 0.104 10
-0.084 0.009 -0.196 8
-0.094 0.068 -0.272 8
-0.128 0.062 0.01 9
-0.341 0.073 0.203 8
-0.307 0.066 0.182 9
-0.451 0.322 0.258 8
-0.462 0.725 0.221 8
-0.539 0.97 0.06 9
-0.565 0.996 0.083 8
-0.51 0.822 0.127 9
-0.459 0.74 0.115 6
-0.352 0.522 0.159 10
-0.23 0.397 0.207 9
-0.102 0.285 0.243 8
0.048 0.169 0.232 9
0.228 0.142 0.129 8
0.37 0.211 -0.004 8
0.333 0.333 -0.031 9
0.299 0.3 -0.028 8
0.213 0.363 0.064 9
0.039 0.317 0.308 8
-0.148 0.28 0.594 8
-0.285 0.331 0.735 7
-0.29 0.415 0.672 10
-0.261 0.374 0.605 9
-0.14 0.41 0.279 8
0.053 0.431 -0.168 8
0.271 0.417 -0.511 9
0.452 0.33 -0.601 8
0.556 0.187 -0.442 8
0.578 0.012 -0.094 9
0.52 0.011 -0.084 8
0.395 -0.05 0.31 9
0.14 0.042 0.543 8
-0.062 0.193 0.633 7
-0.134 0.397 0.557 10
-0.056 0.582 0.28 8
0.145 0.604 -0.049 9
0.13 0.544 -0.044 8
0.335 0.51 -0.381 8
0.468 0.515 -0.727 9
0.526 0.507 -0.953 8
0.521 0.411 -0.983 9
0.438 0.266 -0.846 8
0.394 0.222 -0.607 8
0.206 0.2 -0.546 9
-0.011 0.239 -0.321 6
-0.155 0.276 -0.285 11
-0.2 0.332 -0.465 8
-0.179 0.403 -0.742 8
-0.117 0.448 -0.977 9
-0.105 0.403 -0.879 8
0.001 0.403 -0.969 8
0.088 0.34 -0.854 9
0.127 0.245 -0.626 8
0.104 0.201 -0.431 9
0.004 0.206 -0.198 8
-0.142 0.163 0.162 8
-0.128 0.147 0.146 7
-0.252 0.082 0.488 10
-0.308 0.041 0.67 9
-0.298 0.012 0.707 8
-0.256 0.022 0.667 8
-0.181 0.069 0.596 9
-0.141 0.146 0.498 8
-0.127 0.131 0.448 9
-0.222 0.234 0.382 8
-0.401 0.308 0.358 8
-0.608 0.356 0.377 9
-0.767 0.409 0.418 8
-0.69 0.368 0.376 7
-0.744 0.4 0.409 10
-0.636 0.338 0.438 8
-0.45 0.221 0.415 9
-0.305 0.151 0.33 8
-0.191 0.174 0.22 8
-0.073 0.225 0.124 9
0.039 0.245 0.025 8
0.035 0.221 0.022 9
0.117 0.275 -0.134 8
0.168 0.326 -0.34 8
0.186 0.312 -0.506 9
0.15 0.295 -0.599 7
0.069 0.311 -0.627 10
-0.02 0.288 -0.56 8
-0.018 0.259 -0.504 8
-0.066 0.178 -0.347 9
-0.064 0.084 -0.155 8
-0.049 0.009 -0.031 9
-0.033 -0.016 -0.02 8
-0.012 -0.017 -0.087 8
0.019 -0.015 -0.219 9
0.017 -0.013 -0.197 8
0.036 0.017 -0.359 9
0.016 0.04 -0.459 6
-0.029 0.063 -0.469 10
-0.085 0.121 -0.413 9
-0.101 0.153 -0.302 8
-0.091 0.138 -0.272 9
-0.025 0.101 -0.142 8
0.086 0.015 -0.098 8
0.178 -0.058 -0.16 9
0.185 -0.069 -0.227 8
0.083 -0.027 -0.228 9
-0.065 0.04 -0.189 8
-0.058 0.036 -0.17 8
-0.128 0.107 -0.163 7
-0.07 0.159 -0.218 10
0.052 0.171 -0.309 8
0.18 0.188 -0.367 9
0.285 0.222 -0.333 8
0.325 0.246 -0.244 9
0.293 0.222 -0.22 8
0.218 0.245 -0.148 8
0.079 0.295 -0.107 9
-0.02 0.354 -0.115 8
-0.074 0.401 -0.221 9
-0.082 0.382 -0.338 8
-0.074 0.344 -0.304 7
-0.015 0.322 -0.319 10
0.115 0.339 -0.284 8
0.282 0.304 -0.182 9
0.419 0.242 -0.022 8
0.431 0.179 0.191 8
0.339 0.085 0.49 9
0.305 0.076 0.441 8
0.225 0.008 0.671 9
0.195 0.002 0.793 8
0.211 -0.004 0.796 8
0.255 0.024 0.57 9
0.284 0.112 0.193 6
# end
#Thu Feb 26 20:44:39 GMT+08:00 2015 
