# Supplementary material for: Abnormal Gait Behavior Detection for Elderly Based on Enhanced Wigner-Ville Analysis and Cloud Incremental SVM Learning
Source: Hindawi journal article supplement (doi:10.1155/2016/5869238), 2016-01-01
Supplement: f1 [file 5869238.f1.zip › Supplementary Materials/Original Data/Slipping against a wall ending in sitting position/original__163.txt]

# Accelerometer Values
# filename:  original__163.txt
# Saving start time: Thu Feb 26 20:44:53 GMT+08:00 2015

# sensor resolution: 0.0095825195m/s^2
#Sensorvendor: KIONIX, name: KX023 Accelerometer, type: 1,version : 1, range 39.240005

# X value, Y value, Z value, time diff in ms
-0.065 0.029 -0.668 8
-0.045 -0.048 -0.474 9
-0.04 -0.043 -0.426 6
-0.021 -0.132 -0.165 10
-0.007 -0.222 0.065 9
-0.005 -0.277 0.206 8
-0.012 -0.275 0.241 9
-0.016 -0.236 0.184 8
-0.011 -0.19 0.058 8
-0.01 -0.171 0.052 9
0.002 -0.124 -0.122 8
0.005 -0.068 -0.318 9
-0.015 -0.009 -0.483 8
-0.056 0.047 -0.565 8
-0.095 0.084 -0.573 7
-0.123 0.082 -0.512 10
-0.111 0.073 -0.461 9
-0.146 0.06 -0.309 8
-0.182 0.079 -0.098 8
-0.163 0.123 0.06 9
-0.088 0.11 0.118 8
-0.018 0.062 0.1 9
-0.016 0.056 0.017 8
0.016 0.05 0.016 8
0.026 0.142 -0.077 9
0.024 0.161 -0.115 8
0.015 0.151 -0.063 7
0.01 0.129 0.085 10
-0.009 0.119 0.282 8
-0.008 0.107 0.254 9
-0.046 0.131 0.42 8
-0.078 0.141 0.501 8
-0.069 0.11 0.498 9
-0.02 0.06 0.434 8
0.025 0.034 0.323 9
0.053 0.026 0.187 8
0.048 0.023 0.168 8
0.049 0.036 0.049 9
0.049 0.073 -0.033 7
0.065 0.104 -0.099 10
0.077 0.117 -0.147 8
0.073 0.113 -0.15 8
0.054 0.104 -0.124 9
0.049 0.093 -0.111 8
0.009 0.113 -0.081 9
-0.029 0.132 -0.061 8
-0.044 0.111 -0.049 8
-0.037 0.067 -0.035 9
-0.014 0.024 -0.027 8
-0.012 0.022 -0.024 8
0.015 0.005 -0.04 7
0.04 0.005 -0.101 10
0.058 0.0 -0.183 9
0.069 0.0 -0.264 8
0.074 0.002 -0.319 8
0.06 0.004 -0.323 9
0.054 0.004 -0.291 8
0.035 -0.006 -0.269 9
0.013 -0.01 -0.229 8
-0.004 -0.006 -0.19 8
-0.018 0.008 -0.174 9
-0.025 0.011 -0.204 8
-0.023 0.01 -0.184 7
-0.004 -0.007 -0.248 10
0.012 -0.013 -0.303 8
0.015 0.001 -0.327 9
0.008 0.015 -0.322 8
-0.008 0.004 -0.295 9
-0.044 -0.016 -0.253 8
-0.082 -0.021 -0.209 8
-0.073 -0.019 -0.188 9
-0.08 -0.034 -0.163 8
-0.088 -0.039 -0.15 9
-0.14 0.002 -0.138 8
-0.221 0.04 -0.132 7
-0.298 0.062 -0.127 10
-0.268 0.056 -0.114 8
-0.348 0.095 -0.107 9
-0.497 0.162 -0.095 8
-0.612 0.189 -0.081 8
-0.433 -0.042 -0.076 9
-0.096 -0.361 -0.068 8
0.201 -0.508 -0.063 8
0.181 -0.457 -0.057 9
0.417 -0.503 -0.066 8
0.512 -0.478 -0.082 9
0.509 -0.429 -0.093 6
0.478 -0.367 -0.085 10
0.432 -0.276 -0.07 9
0.36 -0.175 -0.054 8
0.324 -0.157 -0.049 9
0.222 -0.095 -0.037 8
0.106 -0.033 -0.026 8
0.004 0.06 -0.013 9
-0.066 0.163 0.034 8
-0.1 0.255 0.142 9
-0.09 0.23 0.127 8
-0.107 0.311 0.267 8
-0.116 0.402 0.386 7
-0.118 0.491 0.454 10
-0.117 0.554 0.405 9
-0.106 0.577 0.236 8
-0.068 0.553 0.063 8
-0.061 0.497 0.057 9
-0.005 0.396 -0.059 8
0.043 0.232 -0.132 8
0.082 0.076 -0.172 9
0.128 -0.079 -0.195 8
0.195 -0.245 -0.217 9
0.259 -0.351 -0.205 8
0.233 -0.316 -0.184 7
0.253 -0.385 -0.14 10
0.243 -0.446 -0.093 8
0.253 -0.467 -0.064 9
0.295 -0.436 -0.058 8
0.382 -0.341 -0.048 8
0.477 -0.24 -0.048 9
0.43 -0.216 -0.043 8
0.488 -0.074 -0.047 9
0.496 0.151 -0.046 8
0.418 0.37 -0.033 8
0.268 0.495 0.003 9
0.241 0.446 0.003 6
0.104 0.427 0.077 11
-0.006 0.296 0.246 8
-0.093 0.103 0.513 8
-0.138 -0.103 0.744 9
-0.142 -0.178 0.847 8
-0.121 -0.049 0.843 9
-0.118 0.164 0.754 8
-0.107 0.148 0.678 8
-0.151 0.247 0.513 9
-0.239 0.133 0.273 8
-0.303 -0.136 -0.054 8
-0.322 -0.424 -0.348 7
-0.337 -0.747 -0.54 10
-0.316 -1.091 -0.682 9
-0.284 -0.982 -0.614 8
-0.183 -1.184 -0.546 8
-0.036 -1.219 -0.125 9
0.023 -1.213 0.497 8
0.048 -1.223 1.151 9
0.207 -1.213 1.618 8
0.186 -1.092 1.456 8
0.469 -1.034 1.387 9
0.881 -0.853 0.693 8
1.265 -0.635 -0.365 7
1.48 -0.427 -1.213 10
1.696 -0.282 -1.35 8
1.753 -0.387 -0.711 9
1.577 -0.349 -0.64 8
1.363 -0.779 0.517 9
1.097 -1.402 1.741 8
0.906 -1.947 2.821 8
0.838 -2.246 3.479 9
0.943 -2.271 3.281 8
1.151 -2.09 2.384 8
1.036 -1.881 2.145 9
1.121 -1.618 0.926 7
1.164 -1.37 -0.379 10
1.248 -1.222 -1.512 8
1.135 -1.211 -2.286 8
0.719 -1.177 -2.592 9
0.647 -1.059 -2.333 8
0.052 -0.876 -2.225 9
-0.594 -0.692 -1.627 8
-1.23 -0.725 -0.76 8
-1.738 -0.948 -0.009 9
-2.136 -1.172 0.553 8
-2.437 -1.367 0.916 9
-2.193 -1.231 0.824 6
-2.425 -1.468 0.861 10
-2.497 -1.64 0.509 9
-2.42 -1.598 -0.193 8
-2.301 -1.353 -1.044 9
-2.125 -0.966 -1.689 8
-1.939 -0.559 -1.996 8
-1.745 -0.503 -1.796 9
-1.594 -0.162 -1.861 8
-1.535 0.175 -1.718 8
-1.754 0.465 -1.454 9
-2.326 0.656 -1.109 8
-2.094 0.59 -0.998 7
-3.139 0.774 -0.436 10
-2.825 0.696 -0.392 8
-2.7 0.758 -0.378 9
-2.211 0.935 -0.472 8
-1.405 1.166 -0.569 9
-0.567 1.414 -0.561 8
0.04 1.796 -0.452 8
0.036 1.616 -0.407 9
0.261 2.239 -0.27 8
0.123 2.978 -0.114 9
-0.25 3.705 0.14 8
-0.776 4.214 0.8 7
-1.275 4.172 1.975 10
-1.46 3.509 3.377 8
-1.314 3.158 3.039 9
-0.953 2.158 4.502 8
-0.147 1.125 5.733 8
0.828 0.549 6.435 9
1.629 0.673 6.312 8
2.022 1.136 5.328 9
2.165 1.639 3.717 8
1.949 1.475 3.345 8
2.144 1.861 1.632 9
2.315 1.937 0.507 6
2.187 1.699 0.264 11
1.629 1.318 0.688 8
0.667 1.007 1.419 8
0.6 0.906 1.277 9
-0.545 0.694 1.985 8
-1.535 0.439 2.442 8
-1.992 -0.047 2.733 9
-1.721 -0.681 2.776 8
-0.87 -1.158 2.245 9
0.278 -1.249 1.007 8
0.25 -1.124 0.906 8
1.477 -0.889 -0.757 7
2.604 -0.557 -2.395 10
3.532 -0.133 -3.608 9
4.087 0.291 -4.274 8
3.984 0.469 -4.471 8
3.23 0.524 -3.98 9
2.907 0.472 -3.582 8
1.819 0.509 -2.375 9
0.689 0.406 -0.779 8
-0.144 0.067 0.905 8
-0.562 -0.424 2.359 9
-0.542 -0.784 3.185 8
-0.488 -0.706 2.866 7
-0.046 -0.84 3.046 10
0.616 -0.938 2.519 8
1.326 -1.081 1.457 9
1.897 -1.173 0.295 8
2.232 -1.317 -0.615 8
2.291 -1.654 -0.736 9
2.062 -1.488 -0.663 8
1.734 -1.979 0.038 9
1.077 -2.383 1.04 8
0.341 -2.684 1.875 8
-0.266 -2.876 2.243 9
-0.626 -2.759 1.999 7
-0.758 -2.437 1.251 10
-0.682 -2.193 1.125 8
-0.701 -1.891 0.386 8
-0.674 -1.624 -0.077 9
-0.667 -1.393 -0.315 8
-0.721 -1.187 -0.398 9
-0.785 -0.952 -0.529 8
-0.784 -0.709 -0.824 8
-0.705 -0.638 -0.742 9
-0.739 -0.401 -1.173 8
-0.891 -0.042 -1.484 9
-1.169 0.35 -1.447 6
-1.523 0.595 -1.12 10
-1.873 0.684 -0.557 9
-1.686 0.615 -0.501 8
-1.893 0.545 0.065 9
-1.71 0.37 0.399 8
-1.182 0.243 0.466 8
-0.597 0.189 0.162 9
-0.13 0.114 -0.423 8
0.181 0.007 -0.951 8
0.162 0.006 -0.856 9
0.363 -0.092 -1.173 8
0.51 -0.234 -1.385 7
0.636 -0.381 -1.608 10
0.717 -0.4 -1.937 8
0.73 -0.169 -2.39 9
0.706 0.25 -2.926 8
0.635 0.225 -2.633 9
0.595 0.619 -3.201 8
0.528 0.936 -3.511 8
0.32 1.129 -3.475 9
-0.023 1.155 -3.143 8
-0.342 1.07 -2.579 9
-0.308 0.963 -2.321 8
-0.558 0.851 -1.715 7
-0.727 0.681 -1.132 10
-0.851 0.472 -0.62 8
-0.965 0.344 -0.241 9
-0.999 0.356 -0.072 8
-0.842 0.463 -0.251 8
-0.758 0.417 -0.226 9
-0.43 0.51 -0.667 8
-0.078 0.522 -1.097 9
0.177 0.485 -1.356 8
0.323 0.418 -1.311 8
0.381 0.336 -1.018 9
0.343 0.302 -0.916 6
0.36 0.244 -0.644 10
0.361 0.235 -0.506 9
0.388 0.248 -0.561 8
0.478 0.257 -0.818 9
0.592 0.31 -1.084 8
0.663 0.445 -1.172 8
0.669 0.484 -1.096 9
0.602 0.436 -0.986 8
0.571 0.299 -0.815 9
0.538 0.149 -0.501 8
0.509 0.058 -0.124 8
0.446 0.013 0.148 7
0.307 0.001 0.401 10
0.276 0.001 0.361 9
0.08 0.011 0.685 8
-0.096 0.027 0.987 8
-0.192 0.024 1.19 9
-0.371 0.148 1.752 8
-0.602 0.299 2.255 9
-0.593 0.41 2.2 8
-0.534 0.369 1.98 8
-0.518 0.5 2.074 9
-0.78 0.702 2.024 8
-0.824 1.025 1.792 7
-0.479 1.087 1.535 10
-0.038 0.74 1.111 8
0.391 0.258 0.658 9
0.352 0.233 0.592 8
0.61 -0.062 0.065 8
0.67 -0.075 -0.363 9
0.514 0.017 -0.529 8
0.194 0.065 -0.429 9
-0.097 0.053 -0.108 8
-0.087 0.048 0.233 8
-0.211 0.043 0.209 9
-0.183 -0.024 0.381 7
-0.109 -0.071 0.358 10
-0.059 -0.074 0.211 8
-0.02 -0.032 0.026 8
0.004 0.008 -0.147 9
0.004 0.007 -0.132 8
-0.065 0.073 -0.229 9
-0.219 0.209 -0.184 8
-0.353 0.326 -0.047 8
-0.389 0.355 0.009 9
-0.325 0.333 -0.084 8
-0.224 0.317 -0.267 9
-0.201 0.285 -0.24 6
-0.114 0.301 -0.461 10
-0.088 0.344 -0.66 9
-0.115 0.347 -0.728 8
-0.15 0.287 -0.621 9
-0.179 0.232 -0.488 8
-0.196 0.195 -0.425 8
-0.176 0.175 -0.382 9
-0.178 0.113 -0.323 8
-0.167 -0.017 -0.176 8
-0.126 -0.188 0.078 9
-0.082 -0.292 0.341 8
-0.074 -0.263 0.307 7
-0.05 -0.18 0.418 10
-0.043 0.025 0.352 8
-0.047 0.216 0.192 9
-0.007 0.364 -0.007 8
0.123 0.448 -0.23 9
0.305 0.422 -0.429 8
0.451 0.31 -0.551 8
0.406 0.279 -0.495 9
0.453 0.172 -0.556 8
0.396 0.116 -0.557 9
0.298 0.086 -0.528 8
0.207 0.064 -0.53 7
0.149 0.049 -0.584 10
0.121 0.041 -0.677 8
0.109 0.037 -0.61 8
0.078 0.035 -0.684 9
0.02 0.059 -0.692 8
-0.064 0.108 -0.643 9
-0.144 0.128 -0.508 8
-0.2 0.117 -0.276 8
-0.18 0.106 -0.249 9
-0.232 0.126 0.051 8
-0.275 0.161 0.327 9
-0.276 0.121 0.504 6
-0.229 0.023 0.621 10
-0.178 -0.041 0.706 9
-0.149 -0.06 0.742 8
-0.134 -0.054 0.668 9
-0.135 -0.033 0.606 8
-0.164 0.049 0.444 8
-0.201 0.186 0.274 9
-0.23 0.259 0.139 8
-0.247 0.221 0.07 9
-0.223 0.154 0.088 8
-0.201 0.139 0.079 8
-0.134 0.059 0.124 7
-0.066 -0.025 0.151 10
-0.005 -0.083 0.152 9
0.052 -0.108 0.117 8
0.114 -0.112 0.037 8
0.102 -0.101 0.033 9
0.174 -0.097 0.03 8
0.189 -0.029 -0.289 8
0.119 0.11 -0.371 9
0.041 0.21 -0.402 8
-0.013 0.258 -0.399 9
-0.044 0.294 -0.384 8
-0.04 0.265 -0.346 7
-0.022 0.246 -0.339 10
0.065 0.137 -0.371 8
0.156 0.04 -0.417 9
0.218 0.001 -0.452 8
0.263 -0.03 -0.493 8
0.275 -0.04 -0.524 9
0.248 -0.036 -0.471 8
0.237 -0.005 -0.488 9
0.192 0.066 -0.484 8
0.134 0.14 -0.465 8
0.102 0.21 -0.438 9
0.092 0.189 -0.41 6
-0.017 0.315 -0.388 11
-0.015 0.284 -0.349 8
-0.077 0.31 -0.32 8
-0.136 0.317 -0.24 9
-0.198 0.308 -0.078 8
-0.218 0.302 0.111 9
-0.228 0.324 0.244 8
-0.205 0.292 0.219 8
-0.232 0.305 0.312 9
-0.208 0.28 0.389 8
-0.119 0.213 0.412 8
0.006 0.097 0.395 7
0.14 -0.033 0.396 10
0.212 -0.145 0.427 9
0.191 -0.13 0.384 8
0.149 -0.195 0.431 8
0.036 -0.159 0.435 9
-0.068 -0.04 0.412 8
-0.121 0.067 0.353 9
-0.13 0.098 0.241 8
-0.097 0.06 0.26 8
-0.087 0.054 0.234 9
-0.032 -0.036 0.348 8
0.013 -0.149 0.451 7
0.026 -0.283 0.586 10
-0.022 -0.411 0.67 8
-0.095 -0.461 0.717 9
-0.086 -0.415 0.645 8
-0.13 -0.41 0.634 8
-0.116 -0.376 0.507 9
-0.056 -0.335 0.274 8
# end
#Thu Feb 26 20:44:57 GMT+08:00 2015 
