# Supplementary material for: Abnormal Gait Behavior Detection for Elderly Based on Enhanced Wigner-Ville Analysis and Cloud Incremental SVM Learning
Source: Hindawi journal article supplement (doi:10.1155/2016/5869238), 2016-01-01
Supplement: f1 [file 5869238.f1.zip › Supplementary Materials/Original Data/Slipping against a wall ending in sitting position/original__164.txt]

# Accelerometer Values
# filename:  original__164.txt
# Saving start time: Thu Feb 26 20:44:59 GMT+08:00 2015

# sensor resolution: 0.0095825195m/s^2
#Sensorvendor: KIONIX, name: KX023 Accelerometer, type: 1,version : 1, range 39.240005

# X value, Y value, Z value, time diff in ms
-0.009 0.185 -0.455 9
-0.009 0.205 -0.511 8
-0.014 0.218 -0.521 8
-0.012 0.196 -0.469 7
-0.012 0.201 -0.434 10
0.003 0.156 -0.355 9
0.019 0.072 -0.214 8
0.032 0.016 -0.011 8
0.03 -0.002 0.174 9
0.027 -0.002 0.157 8
0.0 -0.008 0.272 9
-0.036 0.01 0.296 8
-0.041 0.037 0.252 8
-0.005 0.02 0.188 9
0.027 -0.027 0.126 8
0.024 -0.024 0.113 7
0.039 -0.062 0.071 10
0.05 -0.1 0.041 8
0.069 -0.146 0.019 9
0.087 -0.178 0.015 8
0.076 -0.192 0.024 8
0.049 -0.167 0.034 9
0.031 -0.116 0.027 8
0.028 -0.104 0.024 9
0.023 -0.057 0.018 8
0.012 -0.022 0.054 8
-0.005 0.019 0.039 9
0.008 0.05 -0.1 6
0.07 0.019 -0.257 11
0.063 0.017 -0.231 8
0.114 -0.02 -0.208 8
0.1 -0.003 -0.369 9
0.05 0.029 -0.366 8
0.001 0.043 -0.334 8
-0.027 0.065 -0.291 9
-0.023 0.073 -0.244 8
-0.02 0.066 -0.219 9
-0.001 0.044 -0.182 8
0.008 0.023 -0.17 8
0.01 0.021 -0.172 7
0.003 0.023 -0.174 10
-0.003 0.017 -0.164 9
0.004 -0.009 -0.146 8
0.003 -0.008 -0.132 8
0.012 -0.033 -0.103 9
0.009 -0.037 -0.061 8
0.009 -0.042 -0.017 9
0.026 -0.063 0.003 8
0.054 -0.105 -0.001 8
0.075 -0.136 -0.017 9
0.067 -0.123 -0.016 8
0.059 -0.133 -0.028 7
0.027 -0.116 -0.03 10
0.001 -0.079 -0.03 8
-0.012 -0.043 -0.035 9
-0.023 0.013 -0.033 8
-0.02 0.012 -0.029 8
-0.021 0.084 -0.019 9
-0.019 0.14 -0.021 8
-0.026 0.175 -0.041 9
-0.032 0.192 -0.056 8
-0.048 0.186 -0.058 8
-0.07 0.183 -0.052 9
-0.063 0.164 -0.047 7
-0.086 0.174 -0.024 10
-0.123 0.197 0.074 8
-0.188 0.235 0.267 8
-0.266 0.256 0.453 9
-0.344 0.257 0.539 8
-0.433 0.239 0.557 9
-0.39 0.215 0.502 8
-0.524 0.208 0.447 8
-0.626 0.216 0.229 9
-0.598 0.202 -0.01 8
-0.367 0.075 -0.111 9
-0.33 0.068 -0.1 6
0.461 -0.397 -0.322 10
0.415 -0.357 -0.29 9
0.761 -0.64 -0.306 8
0.756 -0.752 -0.224 9
0.565 -0.71 -0.175 8
0.407 -0.571 -0.172 8
0.295 -0.4 -0.186 9
0.266 -0.36 -0.167 8
0.178 -0.199 -0.197 9
0.116 -0.058 -0.207 8
0.087 0.032 -0.173 8
0.076 0.069 -0.119 7
0.089 0.079 -0.068 10
0.132 0.08 -0.043 8
0.118 0.072 -0.038 9
0.19 0.081 -0.049 8
0.283 0.125 -0.089 9
0.358 0.192 -0.155 8
0.378 0.237 -0.172 8
0.359 0.251 -0.128 9
0.364 0.219 -0.08 8
0.328 0.197 -0.072 9
0.38 0.113 -0.038 8
0.453 0.066 -0.036 7
0.499 0.121 -0.083 10
0.495 0.212 -0.112 8
0.398 0.269 -0.1 9
0.359 0.242 -0.09 8
0.194 0.252 -0.059 8
0.052 0.208 -0.026 9
-0.046 0.093 -0.001 8
-0.126 -0.097 0.029 9
-0.213 -0.335 0.079 8
-0.319 -0.554 0.242 8
-0.287 -0.499 0.217 9
-0.401 -0.631 0.425 6
-0.49 -0.681 0.548 10
-0.545 -0.699 0.596 9
-0.551 -0.709 0.46 8
-0.466 -0.722 0.078 9
-0.314 -0.744 -0.44 8
-0.283 -0.67 -0.396 8
-0.122 -0.7 -0.854 9
0.025 -0.716 -1.15 8
0.13 -0.779 -1.31 9
0.167 -0.884 -1.271 8
0.132 -0.941 -1.065 8
0.119 -0.847 -0.959 7
0.023 -0.856 -0.762 10
-0.093 -0.849 -0.65 9
-0.2 -0.88 -0.621 8
-0.318 -0.976 -0.686 8
-0.423 -1.075 -0.8 9
-0.466 -1.128 -0.919 8
-0.419 -1.015 -0.827 9
-0.412 -1.047 -0.948 8
-0.417 -1.092 -0.999 8
-0.534 -1.26 -0.918 9
-0.696 -1.507 -0.624 8
-0.757 -1.611 -0.179 7
-0.673 -1.513 0.164 10
-0.605 -1.361 0.147 8
-0.395 -1.204 0.263 9
-0.144 -1.108 0.195 8
0.009 -1.091 0.017 8
0.032 -1.067 -0.144 9
0.018 -1.004 -0.147 8
0.001 -0.922 0.028 9
0.001 -0.83 0.025 8
-0.028 -0.76 0.442 8
-0.066 -0.699 1.075 9
-0.137 -0.614 1.643 7
-0.216 -0.404 1.969 10
-0.214 -0.131 2.128 8
-0.193 -0.117 1.916 8
-0.11 0.202 2.089 9
-0.006 0.603 2.265 8
0.063 0.874 2.424 9
0.067 0.936 2.509 8
0.01 0.939 2.375 8
-0.157 0.997 2.089 9
-0.142 0.897 1.88 8
-0.48 0.971 1.756 9
-0.925 0.97 1.846 6
-1.404 0.943 2.049 10
-1.818 1.055 2.284 9
-1.948 1.218 2.486 8
-1.672 1.182 2.571 9
-1.505 1.064 2.314 8
-1.01 0.847 2.174 8
-0.356 0.558 1.784 9
0.432 0.253 1.2 8
1.137 -0.072 0.629 8
1.562 -0.316 0.293 9
1.606 -0.402 0.236 8
1.445 -0.362 0.213 7
1.175 -0.272 0.402 10
0.629 -0.05 0.613 8
-0.093 0.177 0.564 9
-0.675 0.429 0.246 8
-0.942 0.669 -0.021 9
-0.847 0.602 -0.019 8
-0.835 0.592 0.052 8
-0.618 0.344 0.472 9
-0.331 0.007 1.034 8
-0.056 -0.353 1.427 9
0.243 -0.577 1.5 8
0.218 -0.519 1.35 7
0.572 -0.461 0.874 10
0.864 -0.053 -0.256 8
0.951 0.612 -1.693 9
0.857 1.305 -3.056 8
0.699 1.827 -3.932 8
0.457 2.225 -4.071 9
0.145 2.54 -3.437 8
0.13 2.286 -3.094 8
-0.139 2.537 -1.898 9
-0.321 2.733 -0.512 8
-0.341 2.883 0.474 9
-0.256 2.99 0.615 6
-0.112 2.968 -0.099 10
-0.101 2.814 -1.231 9
-0.091 2.533 -1.108 8
0.708 2.261 -1.947 9
1.175 1.837 -1.955 8
1.564 1.356 -1.055 8
1.863 0.943 0.321 9
2.036 0.736 1.519 8
1.832 0.662 1.367 9
1.803 0.696 2.029 8
1.485 0.978 2.112 8
0.989 1.325 1.72 7
0.466 1.479 1.141 10
-0.005 1.384 0.74 9
-0.352 1.049 0.507 8
-0.317 0.944 0.456 8
-0.5 0.543 0.233 9
-0.547 0.259 0.089 8
-0.55 -0.033 0.201 9
-0.565 -0.499 0.441 8
-0.593 -1.027 0.567 8
-0.593 -1.406 0.586 9
-0.534 -1.265 0.527 8
-0.452 -1.514 0.431 7
-0.258 -1.839 0.166 10
0.047 -2.329 -0.136 8
0.412 -2.877 -0.319 9
0.709 -3.338 -0.397 8
0.638 -3.004 -0.357 8
0.795 -3.383 -0.503 9
0.819 -3.549 -0.765 8
0.623 -3.401 -0.942 9
0.016 -3.024 -0.737 8
-1.009 -2.575 -0.09 8
-2.23 -2.193 0.801 9
-2.007 -1.974 0.721 7
-3.011 -1.689 1.602 10
-3.474 -1.469 2.078 8
-3.387 -1.386 1.931 8
-2.822 -1.416 1.336 9
-2.029 -1.512 0.616 8
-1.271 -1.607 0.088 9
-1.144 -1.446 0.079 8
-0.637 -1.461 -0.091 8
-0.448 -1.392 0.078 9
-0.628 -1.251 0.59 8
-0.986 -1.12 1.232 8
-0.888 -1.008 1.109 7
-1.085 -1.075 1.538 10
-0.977 -0.968 1.384 9
-0.74 -0.912 0.716 8
-0.253 -0.765 -0.236 8
0.127 -0.504 -1.149 9
0.358 -0.11 -1.817 8
0.502 0.266 -2.142 9
0.452 0.239 -1.928 8
0.539 0.481 -2.084 8
0.651 0.676 -2.111 9
0.77 0.905 -1.981 8
0.812 1.085 -1.713 7
0.816 1.138 -1.434 10
0.836 1.128 -1.271 8
0.753 1.015 -1.144 9
0.755 1.052 -1.12 8
0.731 1.137 -1.23 9
0.714 1.249 -1.41 8
0.737 1.326 -1.497 8
0.808 1.236 -1.446 9
0.863 1.051 -1.208 8
0.777 0.946 -1.087 8
0.782 0.793 -0.63 9
0.76 0.654 -0.124 7
0.762 0.539 0.316 10
0.799 0.471 0.584 8
0.841 0.466 0.546 9
0.757 0.42 0.491 8
0.766 0.521 0.289 8
0.706 0.628 0.099 9
0.613 0.602 -0.023 8
0.532 0.465 -0.054 8
0.436 0.27 0.029 9
0.315 0.067 0.201 8
0.284 0.06 0.181 9
0.192 -0.111 0.343 6
0.134 -0.207 0.421 10
0.066 -0.248 0.457 9
0.0 -0.287 0.434 8
-0.012 -0.311 0.304 9
0.059 -0.308 0.114 8
0.053 -0.277 0.103 8
0.177 -0.258 -0.07 9
0.294 -0.234 -0.186 8
0.368 -0.213 -0.247 9
0.398 -0.197 -0.26 8
0.389 -0.191 -0.239 8
0.35 -0.172 -0.215 7
0.316 -0.173 -0.173 10
0.228 -0.178 -0.083 9
0.091 -0.138 -0.025 8
-0.101 -0.041 -0.004 8
-0.325 -0.001 0.06 9
-0.447 -0.006 0.124 8
-0.403 -0.006 0.112 8
-0.379 -0.012 0.118 9
-0.247 -0.03 0.11 8
-0.094 -0.04 0.16 9
-0.006 -0.041 0.322 8
0.011 -0.042 0.517 7
0.011 -0.041 0.595 10
0.01 -0.037 0.535 8
0.025 -0.01 0.486 9
0.061 0.06 0.314 8
0.089 0.128 0.136 8
0.001 0.196 0.096 9
-0.188 0.306 0.127 8
-0.337 0.417 0.188 9
-0.303 0.375 0.169 8
-0.319 0.396 0.155 8
-0.168 0.329 0.001 9
0.017 0.233 -0.14 6
0.111 0.12 -0.213 11
0.115 0.051 -0.215 8
0.104 0.046 -0.123 8
0.057 0.041 -0.11 9
-0.056 -0.019 0.117 8
-0.228 -0.012 0.347 8
-0.319 0.053 0.431 9
-0.249 0.124 0.354 8
-0.1 0.163 0.123 9
-0.09 0.147 0.11 8
0.028 0.152 -0.142 8
0.079 0.1 -0.293 7
0.104 0.015 -0.328 10
0.128 -0.041 -0.271 9
0.145 -0.08 -0.135 8
0.152 -0.121 0.005 8
0.137 -0.108 0.005 9
0.15 -0.13 0.052 8
0.176 -0.123 -0.009 9
0.201 -0.07 -0.125 8
0.232 -0.02 -0.242 8
0.281 -0.031 -0.326 9
0.323 -0.06 -0.386 8
0.29 -0.054 -0.348 7
0.31 -0.04 -0.389 10
0.313 0.028 -0.509 8
0.29 0.061 -0.597 9
0.247 0.024 -0.479 8
0.167 -0.053 -0.3 8
0.15 -0.047 -0.27 9
0.04 -0.063 -0.127 8
-0.049 0.012 -0.062 9
-0.082 0.048 -0.034 8
-0.035 0.025 0.061 8
0.038 0.049 0.207 9
0.034 0.044 0.186 7
0.064 0.169 0.345 10
0.07 0.266 0.452 8
0.105 0.254 0.43 8
0.168 0.199 0.285 9
0.201 0.175 0.083 8
0.19 0.143 -0.094 9
0.158 0.086 -0.212 8
0.142 0.077 -0.191 8
0.103 0.052 -0.253 9
0.057 0.084 -0.268 8
-0.006 0.162 -0.27 9
-0.079 0.242 -0.261 6
-0.164 0.294 -0.241 10
-0.22 0.316 -0.225 9
-0.198 0.285 -0.202 8
-0.178 0.254 -0.184 9
-0.109 0.186 -0.169 8
-0.052 0.115 -0.147 8
-0.024 0.055 -0.103 9
-0.024 0.012 -0.032 8
-0.021 0.011 -0.029 8
-0.062 0.015 0.041 9
-0.109 0.035 0.091 8
-0.099 0.022 0.097 7
-0.03 -0.013 0.038 10
0.063 -0.044 -0.039 8
0.144 -0.078 -0.092 9
0.129 -0.07 -0.083 8
0.173 -0.105 -0.121 9
0.178 -0.114 -0.128 8
0.152 -0.098 -0.106 8
0.108 -0.076 -0.07 9
0.051 -0.058 -0.029 8
-0.004 -0.045 0.042 9
-0.004 -0.04 0.037 8
-0.031 -0.025 0.139 7
-0.015 -0.03 0.193 10
0.013 -0.04 0.154 8
0.026 -0.007 0.09 9
0.001 0.04 0.062 8
0.001 0.036 0.056 8
-0.057 0.081 0.024 9
-0.122 0.143 0.004 8
-0.181 0.209 0.011 9
-0.208 0.243 0.0 8
-0.213 0.287 -0.021 8
-0.269 0.334 -0.015 9
-0.242 0.301 -0.013 6
-0.415 0.329 0.0 11
-0.65 0.414 0.01 8
-0.937 0.611 -0.008 8
-1.191 0.811 -0.065 9
-1.156 0.802 -0.066 8
-0.776 0.518 0.035 8
-0.699 0.466 0.031 9
-0.172 0.133 0.182 8
0.259 -0.123 0.293 9
0.468 -0.315 0.339 8
0.47 -0.395 0.338 8
0.373 -0.366 0.31 7
0.305 -0.309 0.275 10
0.274 -0.278 0.247 9
0.288 -0.246 0.189 8
0.342 -0.204 0.117 8
0.371 -0.14 0.069 9
0.363 -0.103 0.032 8
0.332 -0.07 0.0 9
0.299 -0.063 0.0 8
0.227 -0.012 -0.022 8
0.133 -0.009 0.013 9
0.066 -0.055 0.128 8
0.03 -0.1 0.218 7
0.008 -0.147 0.202 10
-0.02 -0.197 0.128 8
-0.018 -0.177 0.115 9
-0.046 -0.277 0.058 8
-0.063 -0.313 0.232 8
-0.128 -0.268 0.476 9
-0.226 -0.216 0.549 8
-0.234 -0.119 0.576 9
-0.123 -0.011 0.551 8
-0.111 -0.01 0.496 8
0.033 0.088 0.474 9
0.094 0.079 0.439 7
0.084 0.005 0.402 10
0.071 -0.071 0.348 8
0.066 -0.208 0.27 8
0.072 -0.371 0.179 9
0.065 -0.334 0.161 8
# end
#Thu Feb 26 20:45:02 GMT+08:00 20154
