# Supplementary material for: Abnormal Gait Behavior Detection for Elderly Based on Enhanced Wigner-Ville Analysis and Cloud Incremental SVM Learning
Source: Hindawi journal article supplement (doi:10.1155/2016/5869238), 2016-01-01
Supplement: f1 [file 5869238.f1.zip › Supplementary Materials/Original Data/Slipping against a wall ending in sitting position/original__165.txt]

# Accelerometer Values
# filename:  original__165.txt
# Saving start time: Thu Feb 26 20:45:07 GMT+08:00 2015

# sensor resolution: 0.0095825195m/s^2
#Sensorvendor: KIONIX, name: KX023 Accelerometer, type: 1,version : 1, range 39.240005

# X value, Y value, Z value, time diff in ms
0.087 0.094 -0.687 7
0.012 0.156 -0.669 10
-0.047 0.213 -0.598 8
-0.074 0.23 -0.459 9
-0.076 0.178 -0.254 8
-0.051 0.076 -0.026 8
-0.046 0.068 -0.023 9
-0.022 -0.026 0.189 8
-0.022 -0.104 0.353 9
-0.018 -0.172 0.421 8
0.017 -0.206 0.392 8
0.068 -0.204 0.289 9
0.061 -0.184 0.26 7
0.08 -0.172 0.13 10
0.045 -0.144 -0.001 8
-0.016 -0.066 -0.092 8
-0.068 0.028 -0.141 9
-0.086 0.093 -0.183 8
-0.055 0.103 -0.175 9
-0.049 0.093 -0.158 8
0.0 0.065 -0.077 8
0.01 0.028 0.02 9
-0.002 0.012 0.083 8
0.005 -0.002 0.098 9
0.016 -0.013 0.09 6
0.0 0.0 0.068 10
0.0 0.0 0.061 9
-0.023 0.028 0.023 8
-0.015 0.043 -0.019 8
0.015 0.028 -0.048 9
0.04 0.009 -0.058 8
0.045 0.007 -0.043 9
0.05 0.009 -0.019 8
0.045 0.008 -0.017 8
0.058 0.004 -0.007 9
0.059 0.011 -0.007 8
0.036 0.03 0.004 7
-0.003 0.051 0.027 10
-0.025 0.056 0.045 8
-0.001 0.029 0.035 9
-0.001 0.026 0.031 8
0.054 -0.015 -0.002 9
0.092 -0.053 -0.025 8
0.094 -0.087 -0.035 8
0.087 -0.127 -0.057 9
0.073 -0.16 -0.08 8
0.066 -0.144 -0.072 9
0.018 -0.152 -0.088 8
-0.056 -0.101 -0.094 7
-0.124 0.037 -0.12 10
-0.206 0.225 -0.172 8
-0.32 0.378 -0.175 9
-0.358 0.446 -0.138 8
-0.322 0.401 -0.124 8
-0.179 0.348 -0.09 9
0.056 0.267 0.01 8
0.293 0.105 -0.204 8
0.495 -0.135 -0.509 9
0.488 -0.285 -0.495 8
0.264 -0.344 -0.401 9
0.237 -0.309 -0.361 6
-0.004 -0.307 -0.144 10
-0.17 -0.341 0.118 9
-0.273 -0.375 0.285 8
-0.331 -0.323 0.343 9
-0.363 -0.249 0.375 8
-0.326 -0.209 0.447 8
-0.294 -0.188 0.403 9
-0.411 -0.159 0.469 8
-0.404 -0.118 0.475 9
-0.343 -0.054 0.429 8
-0.255 0.005 0.361 8
-0.229 0.005 0.324 7
-0.136 0.025 0.248 10
-0.035 0.002 0.159 9
0.07 -0.043 0.07 8
0.156 -0.08 -0.002 8
0.212 -0.105 -0.047 9
0.242 -0.141 -0.033 8
0.252 -0.21 0.05 8
0.227 -0.189 0.045 9
0.232 -0.281 0.168 8
0.222 -0.37 0.297 9
0.204 -0.438 0.402 8
0.205 -0.45 0.466 7
0.247 -0.412 0.446 10
0.305 -0.351 0.35 8
0.275 -0.316 0.315 9
0.294 -0.233 0.209 8
0.245 -0.163 0.122 8
0.161 -0.108 0.089 9
0.1 -0.067 0.103 8
0.084 -0.039 0.121 9
0.099 0.03 0.11 8
0.089 0.027 0.099 8
0.134 0.107 0.026 9
0.196 0.164 -0.114 6
0.211 0.201 -0.244 11
0.15 0.206 -0.305 8
0.052 0.198 -0.271 8
0.047 0.178 -0.244 9
-0.06 0.17 -0.105 8
-0.145 0.155 0.07 9
-0.166 0.133 0.188 8
-0.121 0.108 0.207 8
-0.039 0.091 0.152 9
0.028 0.075 0.087 8
0.025 0.067 0.078 8
0.056 0.038 0.02 7
0.068 0.022 -0.054 10
0.075 0.035 -0.142 9
0.064 0.044 -0.197 8
0.023 0.024 -0.216 8
-0.009 -0.042 -0.242 9
-0.008 -0.038 -0.218 8
-0.006 -0.108 -0.253 9
0.02 -0.175 -0.278 8
0.067 -0.291 -0.307 8
0.161 -0.4 -0.399 9
0.273 -0.449 -0.537 8
0.245 -0.404 -0.483 7
0.318 -0.444 -0.578 10
0.343 -0.488 -0.605 8
0.262 -0.469 -0.582 9
0.06 -0.364 -0.501 8
-0.194 -0.262 -0.354 9
-0.449 -0.211 -0.233 8
-0.404 -0.19 -0.122 8
-0.624 -0.154 -0.11 9
-0.802 -0.125 0.083 8
-0.929 -0.164 0.249 8
-0.961 -0.269 0.29 9
-0.834 -0.285 0.366 7
-0.598 -0.085 0.475 10
-0.538 -0.076 0.427 8
-0.341 0.144 0.296 8
-0.214 0.086 -0.012 9
-0.09 -0.222 -0.152 8
0.032 -0.661 0.038 9
0.12 -1.183 0.449 8
0.195 -1.672 0.902 8
0.176 -1.505 0.812 9
0.249 -1.813 1.169 8
0.276 -1.93 1.262 9
0.27 -1.937 0.988 6
0.223 -1.809 0.443 10
0.068 -1.603 -0.173 9
-0.235 -1.487 -0.605 8
-0.211 -1.338 -0.545 9
-0.581 -1.441 -0.494 8
-0.871 -1.652 -0.003 8
-0.966 -1.917 0.569 9
-0.862 -2.241 1.007 8
-0.63 -2.561 1.193 9
-0.326 -2.75 0.986 8
-0.293 -2.475 0.888 8
-0.052 -2.456 0.363 7
0.017 -2.225 -0.325 10
-0.132 -1.794 -0.944 8
-0.376 -1.244 -1.325 9
-0.686 -0.69 -1.462 8
-0.617 -0.621 -1.315 9
-0.955 -0.162 -1.217 8
-1.142 0.148 -1.03 8
-1.193 0.336 -0.958 9
-1.14 0.497 -1.074 8
-0.955 0.687 -1.324 9
-0.573 0.861 -1.641 8
-0.515 0.774 -1.477 7
-0.112 0.89 -1.728 10
0.085 0.955 -1.686 8
0.001 1.059 -1.292 9
-0.231 1.247 -0.566 8
-0.309 1.441 0.199 8
-0.126 1.621 0.633 9
-0.113 1.459 0.569 8
0.193 1.694 0.741 9
0.519 1.882 0.839 8
0.802 1.949 0.926 8
0.948 1.912 1.12 9
0.853 1.721 1.008 6
0.968 1.561 2.13 11
0.871 1.405 1.917 8
0.773 1.301 2.315 8
0.567 1.425 2.37 9
0.261 1.82 2.179 8
-0.077 2.264 1.968 8
-0.446 2.5 1.956 9
-0.401 2.25 1.76 8
-0.711 2.233 2.15 9
-0.821 2.001 2.73 8
-0.725 1.712 3.212 8
-0.472 1.554 3.375 7
-0.27 1.487 3.077 10
-0.173 1.403 2.376 9
-0.156 1.262 2.138 8
-0.138 1.188 1.215 8
-0.203 1.172 0.312 9
-0.183 1.201 -0.359 8
-0.043 1.131 -0.703 9
0.241 0.921 -0.702 8
0.733 0.539 -0.581 8
0.66 0.485 -0.523 9
1.218 -0.033 -0.45 8
1.762 -0.337 -0.351 7
2.136 -0.107 -0.284 10
2.191 0.522 -0.533 8
2.003 1.206 -1.17 9
1.802 1.085 -1.853 8
1.386 0.977 -1.668 8
0.684 1.708 -2.042 9
-0.283 1.647 -1.497 8
-1.277 1.24 0.296 9
-1.99 0.261 2.912 8
-2.355 -1.016 5.712 8
-2.12 -0.915 5.141 9
-2.129 -2.0 7.557 7
-1.915 -2.657 8.891 10
-1.655 -2.823 8.584 8
-1.343 -2.562 6.71 8
-1.064 -2.093 4.047 9
-0.846 -1.626 1.555 8
-0.761 -1.464 1.399 9
-0.55 -1.187 0.036 8
-0.421 -1.202 0.053 8
-0.424 -1.356 1.012 9
-0.459 -1.48 2.228 8
-0.45 -1.701 2.934 9
-0.405 -1.531 2.64 6
-0.206 -1.802 2.487 10
0.226 -1.898 1.518 9
0.704 -1.711 0.035 8
1.073 -1.339 -1.73 9
1.398 -0.954 -3.568 8
1.823 -0.647 -5.199 8
2.301 -0.648 -6.376 9
2.071 -0.583 -5.738 8
2.453 -0.842 -6.372 8
2.579 -1.008 -6.368 9
2.411 -0.996 -5.814 8
1.935 -0.82 -4.89 7
1.219 -0.53 -3.972 10
1.097 -0.477 -3.575 8
0.39 -0.176 -3.038 9
-0.127 0.11 -3.004 8
-0.382 0.445 -3.517 9
-0.347 0.791 -4.402 8
-0.027 0.958 -5.298 8
0.383 0.909 -5.711 9
0.344 0.818 -5.14 8
0.648 0.653 -4.756 9
0.764 0.359 -3.548 8
0.671 -0.045 -1.966 7
0.51 -0.477 -0.52 10
0.453 -0.763 0.288 8
0.604 -0.862 0.233 9
0.544 -0.776 0.21 8
0.809 -0.705 -0.325 8
0.961 -0.497 -0.74 9
0.881 -0.289 -0.717 8
0.602 -0.159 -0.313 8
0.274 -0.068 0.222 9
0.012 0.134 0.667 8
0.011 0.121 0.601 9
-0.318 0.362 1.382 6
-1.021 0.744 1.973 10
-1.902 1.186 2.628 9
-2.176 1.282 2.966 8
-1.667 1.173 2.568 9
-1.5 1.056 2.311 8
-0.998 0.9 2.066 8
-0.752 0.825 1.868 9
-0.52 0.908 1.568 8
-0.188 0.897 1.059 9
0.272 0.722 0.702 8
0.794 0.497 0.415 8
0.715 0.447 0.374 7
1.156 0.302 0.035 10
1.382 0.22 -0.454 9
1.381 0.147 -0.857 8
1.061 0.28 -1.231 8
0.635 0.662 -1.745 9
0.359 0.925 -2.061 8
0.323 0.833 -1.855 8
0.173 0.895 -1.716 9
0.085 0.792 -1.168 8
0.054 0.544 -0.509 9
0.162 0.212 0.022 8
0.145 0.191 0.02 7
0.387 -0.229 0.563 10
0.349 -0.206 0.507 8
0.652 -0.268 0.733 9
0.493 -0.284 0.835 8
0.197 -0.07 0.393 8
-0.201 0.267 -0.482 9
-0.641 0.543 -0.888 8
-0.577 0.489 -0.799 9
-0.93 0.679 -0.482 8
-0.851 0.709 0.053 8
-0.231 0.478 0.342 9
0.5 0.069 0.355 7
0.937 -0.14 0.282 10
1.023 -0.058 0.226 8
0.921 -0.052 0.203 8
0.731 0.139 0.194 9
0.349 0.358 0.275 8
-0.033 0.732 0.319 9
-0.36 1.155 0.251 8
-0.512 1.38 0.147 8
-0.424 1.399 -0.009 9
-0.381 1.259 -0.008 8
-0.19 1.16 -0.188 9
0.107 0.958 -0.36 6
0.445 0.674 -0.567 10
0.685 0.437 -0.751 9
0.757 0.362 -0.842 8
0.681 0.325 -0.757 8
0.465 0.409 -0.774 9
0.042 0.544 -0.594 8
-0.427 0.651 -0.25 9
-0.813 0.726 0.02 8
-0.938 0.784 0.027 8
-0.815 0.759 -0.225 9
-0.733 0.683 -0.202 8
-0.462 0.547 -0.475 7
-0.171 0.375 -0.56 10
0.075 0.204 -0.5 8
0.31 0.115 -0.444 9
0.458 0.166 -0.506 8
0.431 0.329 -0.809 9
0.388 0.296 -0.728 8
0.249 0.573 -1.225 8
0.196 0.786 -1.673 9
0.286 0.733 -1.92 8
0.42 0.492 -1.953 9
0.525 0.299 -1.75 8
0.472 0.269 -1.575 7
0.454 0.198 -1.164 10
0.271 0.167 -0.674 8
0.011 0.201 -0.227 9
-0.195 0.323 0.092 8
-0.323 0.467 0.244 8
-0.427 0.572 0.21 9
-0.384 0.515 0.189 8
-0.524 0.547 0.17 8
-0.765 0.536 -0.19 9
-1.084 0.523 -0.24 8
-1.383 0.487 -0.183 9
-1.418 0.36 -0.135 6
-1.134 0.131 -0.071 10
-1.02 0.118 -0.064 9
-0.674 -0.105 0.121 8
-0.395 -0.226 0.353 9
-0.202 -0.244 0.44 8
-0.055 -0.237 0.361 8
0.091 -0.244 0.25 9
0.237 -0.221 0.147 8
0.213 -0.199 0.132 9
0.32 -0.092 -0.016 8
0.383 0.062 -0.151 8
0.437 0.194 -0.212 7
0.534 0.293 -0.248 10
0.694 0.372 -0.378 9
0.798 0.442 -0.624 8
0.718 0.397 -0.561 8
0.699 0.52 -0.619 9
0.517 0.813 -0.603 8
0.284 1.218 -0.711 8
0.153 1.497 -0.706 9
0.026 1.543 -0.422 8
0.024 1.389 -0.38 9
-0.141 1.356 -0.342 8
-0.215 1.355 0.909 7
-0.131 1.335 1.443 10
-0.015 1.251 1.867 8
0.014 1.144 2.151 9
-0.051 1.042 2.194 8
-0.046 0.937 1.974 8
# end
#Thu Feb 26 20:45:10 GMT+08:00 20159
