# Supplementary material for: Abnormal Gait Behavior Detection for Elderly Based on Enhanced Wigner-Ville Analysis and Cloud Incremental SVM Learning
Source: Hindawi journal article supplement (doi:10.1155/2016/5869238), 2016-01-01
Supplement: f1 [file 5869238.f1.zip › Supplementary Materials/Original Data/Slipping against a wall ending in sitting position/original__167.txt]

# Accelerometer Values
# filename:  original__167.txt
# Saving start time: Thu Feb 26 20:45:23 GMT+08:00 2015

# sensor resolution: 0.0095825195m/s^2
#Sensorvendor: KIONIX, name: KX023 Accelerometer, type: 1,version : 1, range 39.240005

# X value, Y value, Z value, time diff in ms
0.026 -0.04 0.124 9
0.092 -0.104 -0.111 8
0.116 -0.091 -0.36 8
0.094 0.011 -0.58 9
0.067 0.102 -0.641 8
0.055 0.133 -0.505 9
0.049 0.12 -0.262 8
0.051 0.108 -0.236 7
0.058 0.084 -0.01 10
0.062 0.043 0.154 8
0.053 0.022 0.223 9
0.036 0.018 0.195 8
0.024 0.014 0.099 8
0.022 0.013 0.089 9
0.021 0.004 -0.035 8
0.014 -0.007 -0.131 9
0.002 -0.007 -0.198 8
0.0 -0.009 -0.225 8
0.002 -0.037 -0.197 9
0.002 -0.033 -0.177 6
0.003 -0.042 -0.166 10
-0.008 -0.003 -0.198 9
-0.027 0.046 -0.226 8
-0.04 0.079 -0.219 9
-0.032 0.091 -0.188 8
-0.007 0.07 -0.131 8
0.016 0.03 -0.096 9
0.014 0.027 -0.086 8
0.021 0.022 -0.137 9
0.028 0.037 -0.222 8
0.033 0.042 -0.272 8
0.021 0.06 -0.294 7
0.008 0.077 -0.283 10
0.007 0.069 -0.255 9
0.004 0.055 -0.175 8
-0.003 0.025 -0.042 8
-0.023 0.004 0.058 9
-0.033 0.0 0.05 8
-0.018 0.009 -0.047 9
-0.003 0.016 -0.157 8
-0.002 0.014 -0.141 8
0.005 -0.001 -0.196 9
-0.002 -0.004 -0.165 8
-0.012 0.007 -0.062 7
-0.024 0.016 0.065 10
-0.058 0.043 0.161 8
-0.091 0.076 0.199 9
-0.082 0.068 0.179 8
-0.097 0.084 0.167 8
-0.101 0.09 0.119 9
-0.093 0.099 0.112 8
-0.062 0.078 0.156 9
-0.021 0.015 0.198 8
-0.018 0.014 0.178 8
0.032 -0.033 0.177 9
0.088 -0.064 0.162 7
0.117 -0.115 0.161 10
0.106 -0.127 0.129 8
0.072 -0.049 0.027 8
0.05 0.043 -0.077 9
0.045 0.038 -0.069 8
0.043 0.07 -0.073 9
0.044 0.05 -0.075 8
0.044 0.047 -0.168 8
0.042 0.081 -0.272 9
0.047 0.092 -0.29 8
0.074 0.068 -0.215 9
0.066 0.061 -0.194 6
0.097 0.024 -0.08 10
0.107 -0.005 0.055 9
0.097 -0.011 0.181 8
0.093 -0.006 0.271 8
0.118 0.0 0.324 9
0.106 0.0 0.333 8
0.162 0.011 0.3 9
0.226 0.012 0.247 8
0.283 0.013 0.077 8
0.316 0.021 -0.156 9
0.324 0.023 -0.322 8
0.292 0.021 -0.29 7
0.271 0.046 -0.346 10
0.206 0.125 -0.339 8
0.083 0.253 -0.327 9
-0.098 0.402 -0.315 8
-0.213 0.475 -0.253 9
-0.062 0.411 -0.289 8
0.261 0.295 -0.525 8
0.235 0.266 -0.473 9
0.497 0.033 -0.707 8
0.609 -0.293 -0.8 9
0.561 -0.527 -0.679 8
0.421 -0.631 -0.414 7
0.283 -0.662 -0.188 10
0.172 -0.665 -0.028 8
0.155 -0.598 -0.025 8
0.035 -0.579 0.101 9
-0.077 -0.531 0.207 8
-0.161 -0.467 0.228 9
-0.227 -0.379 0.166 8
-0.263 -0.238 0.091 8
-0.237 -0.214 0.082 9
-0.218 -0.02 0.019 8
-0.132 0.186 -0.04 9
-0.038 0.354 -0.089 6
0.038 0.478 -0.118 10
0.093 0.555 -0.112 9
0.107 0.583 -0.069 8
0.096 0.525 -0.062 9
0.095 0.511 0.001 8
0.118 0.427 0.179 8
0.137 0.291 0.479 9
0.134 0.154 0.715 8
0.156 0.058 0.771 9
0.211 -0.039 0.679 8
0.189 -0.035 0.611 8
0.214 -0.127 0.506 7
0.142 -0.21 0.495 10
0.001 -0.311 0.564 9
-0.144 -0.4 0.636 8
-0.24 -0.478 0.674 8
-0.216 -0.43 0.607 9
-0.204 -0.474 0.589 8
-0.108 -0.478 0.523 8
-0.011 -0.46 0.462 9
0.074 -0.434 0.388 8
0.15 -0.404 0.263 9
0.18 -0.355 0.121 8
0.162 -0.319 0.109 7
0.177 -0.273 0.025 10
0.217 -0.253 -0.021 8
0.268 -0.241 -0.11 9
0.299 -0.224 -0.307 8
0.306 -0.208 -0.518 8
0.283 -0.185 -0.595 9
0.254 -0.167 -0.536 8
0.187 -0.152 -0.42 9
0.065 -0.19 -0.173 8
-0.015 -0.257 0.071 8
-0.031 -0.278 0.224 9
-0.028 -0.251 0.209 6
-0.112 -0.289 0.079 11
-0.101 -0.26 0.071 8
-0.188 -0.286 -0.042 8
-0.292 -0.33 -0.067 9
-0.39 -0.416 -0.036 8
-0.47 -0.493 0.015 9
-0.51 -0.559 -0.041 8
-0.459 -0.503 -0.037 8
-0.447 -0.547 -0.302 9
-0.385 -0.557 -0.721 8
-0.295 -0.549 -1.122 8
-0.208 -0.532 -1.31 7
-0.192 -0.519 -1.258 10
-0.241 -0.509 -1.041 9
-0.217 -0.458 -0.937 8
-0.245 -0.465 -0.815 8
-0.2 -0.498 -0.866 9
-0.104 -0.493 -1.051 8
-0.039 -0.353 -1.285 9
0.087 0.005 -1.524 8
0.239 0.425 -1.869 8
0.215 0.383 -1.682 9
0.273 0.699 -1.935 8
0.162 0.917 -1.838 7
-0.147 0.93 -1.146 10
-0.462 0.651 0.094 8
-0.645 0.102 1.332 9
-0.58 -0.574 2.263 8
-0.522 -0.516 2.036 8
-0.311 -1.194 2.564 9
-0.038 -1.72 2.651 8
0.117 -1.925 2.357 9
0.002 -1.697 1.819 8
-0.444 -1.143 1.359 8
-0.399 -1.028 1.223 9
-1.053 -0.445 1.051 7
-1.632 -0.043 1.078 10
-1.957 0.039 1.163 8
-2.014 -0.161 1.241 8
-1.868 -0.464 1.179 9
-1.608 -0.715 1.078 8
-1.447 -0.643 0.971 9
-1.29 -0.873 0.935 8
-1.238 -1.005 0.807 8
-1.138 -0.934 0.568 9
-0.953 -0.743 0.235 8
-0.73 -0.498 -0.29 9
-0.657 -0.448 -0.261 6
-0.441 -0.167 -0.967 10
-0.274 0.171 -1.622 9
-0.254 0.535 -2.007 8
-0.361 0.817 -1.962 9
-0.55 0.904 -1.454 8
-0.694 0.814 -0.591 8
-0.625 0.732 -0.532 9
-0.596 0.515 0.291 8
-0.383 0.182 0.684 9
-0.059 -0.118 0.539 8
0.16 -0.303 -0.097 8
0.039 -0.224 -0.671 7
-0.403 0.118 -0.494 10
-0.362 0.106 -0.445 8
-0.728 0.368 0.36 9
-0.62 0.355 1.264 8
-0.196 0.142 1.973 9
0.215 -0.1 2.381 8
0.473 -0.158 2.494 8
0.535 -0.042 2.552 9
0.482 -0.037 2.296 8
0.346 0.066 2.401 9
0.101 0.202 2.463 8
-0.143 0.355 2.583 7
-0.482 0.434 2.878 10
-0.646 0.442 3.344 8
-0.581 0.398 3.01 9
-0.319 0.323 3.226 8
0.156 0.273 2.739 8
0.683 0.36 1.638 9
1.199 0.6 0.294 8
1.745 0.852 -0.93 9
2.417 0.951 -1.818 8
2.175 0.856 -1.636 8
2.973 0.854 -2.237 9
3.763 0.832 -2.678 6
4.386 0.816 -2.911 11
4.769 0.837 -3.086 8
4.845 1.028 -3.451 8
4.533 1.375 -4.026 9
4.079 1.238 -3.624 8
3.472 1.646 -4.137 8
2.681 1.951 -4.108 9
1.929 1.956 -3.378 8
1.361 1.619 -2.171 9
1.06 1.153 -0.788 8
0.954 1.037 -0.709 8
0.819 0.588 -0.638 7
0.716 0.307 1.862 10
0.648 0.327 2.265 9
0.584 0.626 1.744 8
0.389 1.184 1.032 8
-0.021 1.676 0.651 9
-0.019 1.509 0.586 8
-0.405 1.742 0.482 9
-0.57 1.738 0.564 8
-0.626 1.479 0.561 8
-0.817 1.057 0.628 9
-1.347 0.61 1.227 8
-1.212 0.549 1.104 7
-1.98 0.137 2.197 10
-2.621 -0.282 3.365 8
-2.784 -0.823 4.144 9
-2.374 -1.444 4.28 8
-1.6 -1.961 3.815 8
-0.796 -2.248 2.982 9
-0.125 -2.345 2.167 8
-0.112 -2.11 1.95 9
0.381 -2.213 1.552 8
0.555 -2.324 1.49 8
0.301 -2.319 1.72 9
-0.351 -2.135 2.334 7
-1.237 -1.751 2.941 10
-1.113 -1.576 2.647 8
-1.928 -1.164 2.922 8
-2.287 -0.958 2.824 9
-2.13 -1.011 2.484 8
-1.719 -1.149 1.945 9
-1.208 -1.242 1.18 8
-0.662 -1.414 0.362 8
-0.595 -1.273 0.326 9
-0.081 -1.568 -0.249 8
0.443 -1.877 -0.658 9
0.858 -2.126 -0.979 6
0.924 -2.194 -1.044 10
0.468 -1.946 -0.809 9
-0.345 -1.447 -0.363 8
-0.31 -1.303 -0.326 8
-1.097 -0.854 0.137 9
-1.537 -0.556 0.369 8
-1.474 -0.405 0.189 9
-1.014 -0.345 -0.334 8
-0.321 -0.366 -0.93 8
0.449 -0.548 -1.346 9
0.404 -0.493 -1.211 8
1.096 -0.85 -1.452 7
1.528 -1.129 -1.55 10
1.528 -1.072 -1.534 8
1.175 -0.728 -1.54 9
0.654 -0.3 -1.762 8
0.588 -0.27 -1.586 9
0.011 0.238 -1.948 8
-0.47 0.75 -2.231 8
-0.706 1.085 -2.438 9
-0.645 1.291 -2.593 8
-0.451 1.385 -2.619 9
-0.321 1.415 -2.42 8
-0.289 1.273 -2.178 7
-0.233 1.27 -1.799 10
-0.138 1.164 -1.435 8
-0.209 0.836 -1.189 9
-0.382 0.474 -0.934 8
-0.418 0.339 -0.772 8
-0.416 0.288 -0.788 9
-0.374 0.259 -0.709 8
-0.285 0.204 -0.761 8
-0.095 0.172 -0.787 9
0.097 0.142 -0.863 8
0.215 0.145 -0.956 9
0.194 0.13 -0.861 6
0.253 0.308 -1.147 10
0.228 0.277 -1.032 9
0.201 0.236 -0.893 8
0.131 0.096 -0.508 9
0.014 -0.03 -0.161 8
-0.11 -0.088 0.058 8
-0.131 -0.121 0.18 9
-0.118 -0.109 0.162 8
-0.029 -0.119 0.37 9
0.164 -0.141 0.495 8
0.478 -0.357 0.559 8
0.689 -0.621 0.686 7
0.501 -0.409 0.691 10
-0.02 0.158 0.602 9
-0.018 0.143 0.542 8
-0.489 0.428 0.53 8
-0.613 0.676 -0.023 9
-0.21 0.914 -0.774 8
0.46 0.613 -0.74 8
0.875 0.141 -0.308 9
0.937 -0.024 -0.018 8
0.843 -0.022 -0.017 9
0.757 0.082 -0.133 8
0.668 0.21 -0.485 7
0.607 0.202 -0.686 10
0.548 0.116 -0.51 8
0.449 0.046 -0.07 9
0.322 -0.014 0.405 8
0.29 -0.013 0.364 8
0.15 -0.09 0.713 9
-0.015 -0.13 0.914 8
-0.212 -0.052 1.024 9
-0.376 0.121 1.063 8
-0.379 0.229 0.961 8
-0.341 0.206 0.865 9
-0.138 0.223 0.498 7
0.151 0.163 -0.019 10
0.379 0.007 -0.151 8
0.343 -0.079 0.291 8
0.003 0.084 0.817 9
-0.313 0.345 0.992 8
-0.282 0.31 0.893 9
-0.312 0.428 0.67 8
-0.065 0.426 0.257 8
0.207 0.395 -0.092 9
0.327 0.359 -0.334 8
0.346 0.326 -0.503 9
0.311 0.293 -0.452 6
0.324 0.257 -0.566 10
0.349 0.192 -0.52 9
0.355 0.106 -0.277 8
0.327 0.061 -0.043 8
0.271 0.073 -0.061 9
0.185 0.108 -0.335 8
0.06 0.139 -0.654 9
0.054 0.125 -0.589 8
-0.091 0.16 -0.844 8
-0.185 0.247 -1.038 9
-0.165 0.34 -1.083 8
-0.061 0.305 -0.887 7
0.056 0.192 -0.6 10
0.05 0.173 -0.54 8
0.138 0.092 -0.314 9
0.165 0.049 -0.081 8
0.159 0.025 0.176 9
0.114 0.015 0.387 8
0.041 0.01 0.387 8
0.028 0.016 0.146 9
0.026 0.014 0.131 8
0.074 0.042 -0.169 8
0.122 0.099 -0.389 9
0.198 0.126 -0.477 7
0.313 0.078 -0.416 10
0.312 0.031 -0.162 8
0.101 0.086 0.255 9
0.091 0.077 0.229 8
-0.226 0.249 0.616 8
-0.486 0.373 0.816 9
-0.586 0.391 0.785 8
-0.534 0.4 0.525 8
-0.356 0.378 0.158 9
-0.32 0.34 0.142 8
-0.112 0.292 -0.183 9
-0.011 0.287 -0.44 6
-0.06 0.287 -0.526 10
-0.184 0.294 -0.409 9
-0.274 0.355 -0.305 8
-0.242 0.379 -0.288 9
-0.218 0.341 -0.259 8
-0.127 0.311 -0.271 8
-0.096 0.31 -0.259 9
-0.127 0.319 -0.217 8
-0.174 0.314 -0.168 9
-0.169 0.276 -0.164 8
-0.079 0.2 -0.219 8
-0.071 0.18 -0.197 7
0.085 0.126 -0.198 10
0.218 0.111 -0.178 9
0.232 0.16 -0.209 8
0.183 0.227 -0.254 8
0.145 0.198 -0.218 9
0.051 0.155 -0.079 8
0.046 0.139 -0.071 8
-0.101 0.174 0.051 9
-0.154 0.219 0.1 8
-0.042 0.236 0.082 9
0.12 0.215 0.023 8
0.108 0.194 0.021 7
0.171 0.168 -0.042 10
0.128 0.148 -0.19 8
0.075 0.03 -0.387 9
0.056 -0.022 -0.409 8
0.049 0.062 -0.361 8
0.138 0.105 -0.333 9
0.262 0.103 -0.206 8
0.236 0.093 -0.185 9
0.274 0.081 -0.006 8
0.196 0.072 0.182 8
0.011 0.063 0.309 9
-0.153 0.039 0.291 6
-0.215 0.03 0.158 11
-0.133 0.024 -0.02 8
-0.12 0.021 -0.018 8
0.074 -0.019 -0.184 9
0.247 -0.105 -0.299 8
0.345 -0.189 -0.324 8
# end
#Thu Feb 26 20:45:27 GMT+08:00 20159
