# Supplementary material for: Abnormal Gait Behavior Detection for Elderly Based on Enhanced Wigner-Ville Analysis and Cloud Incremental SVM Learning
Source: Hindawi journal article supplement (doi:10.1155/2016/5869238), 2016-01-01
Supplement: f1 [file 5869238.f1.zip › Supplementary Materials/Original Data/Slipping against a wall ending in sitting position/original__168.txt]

# Accelerometer Values
# filename:  original__168.txt
# Saving start time: Thu Feb 26 20:45:29 GMT+08:00 2015

# sensor resolution: 0.0095825195m/s^2
#Sensorvendor: KIONIX, name: KX023 Accelerometer, type: 1,version : 1, range 39.240005

# X value, Y value, Z value, time diff in ms
-0.017 -0.003 -0.127 10
-0.046 0.029 -0.129 9
-0.071 0.039 -0.096 8
-0.084 0.054 -0.036 8
-0.088 0.085 0.022 9
-0.081 0.092 0.041 8
-0.073 0.083 0.037 8
-0.066 0.086 -0.001 9
-0.041 0.08 -0.072 8
0.004 0.032 -0.096 9
0.035 -0.019 -0.074 8
0.05 -0.057 -0.043 7
0.059 -0.104 -0.015 10
0.053 -0.093 -0.014 8
0.035 -0.117 0.036 9
-0.018 -0.082 0.064 8
-0.068 -0.026 0.003 8
-0.07 -0.004 -0.081 9
-0.037 -0.012 -0.121 8
-0.016 -0.033 -0.125 9
-0.014 -0.029 -0.113 8
-0.019 -0.047 -0.11 8
-0.027 -0.05 -0.105 9
-0.018 -0.069 -0.036 6
-0.018 -0.107 0.132 11
-0.048 -0.101 0.238 8
-0.069 -0.073 0.245 8
-0.062 -0.065 0.22 9
-0.05 -0.087 0.243 8
-0.039 -0.11 0.288 8
-0.047 -0.075 0.265 9
-0.042 -0.04 0.167 8
-0.007 -0.049 0.076 9
-0.007 -0.044 0.068 8
0.011 -0.042 -0.004 8
0.001 -0.013 -0.089 7
-0.002 -0.012 -0.168 10
0.012 -0.048 -0.208 9
0.027 -0.062 -0.205 8
0.019 -0.06 -0.128 8
0.017 -0.054 -0.115 9
-0.001 -0.034 0.025 8
0.007 -0.014 0.131 9
0.047 -0.045 0.131 8
0.07 -0.06 0.045 8
0.047 -0.021 -0.065 9
-0.013 0.028 -0.118 8
-0.011 0.025 -0.106 7
-0.079 0.063 -0.068 10
-0.115 0.077 0.026 8
-0.103 0.044 0.149 9
-0.065 -0.016 0.294 8
-0.037 -0.064 0.417 8
-0.015 -0.088 0.487 9
-0.014 -0.079 0.438 8
0.0 -0.082 0.448 9
0.017 -0.068 0.392 8
0.048 -0.052 0.298 8
0.07 -0.041 0.146 9
0.063 -0.037 0.131 7
0.061 -0.023 -0.084 10
0.047 0.004 -0.267 8
0.033 0.028 -0.348 8
0.018 0.044 -0.358 9
0.014 0.066 -0.319 8
0.024 0.09 -0.184 9
0.029 0.084 -0.007 8
0.026 0.075 -0.006 8
0.014 0.062 0.019 9
0.0 0.066 -0.112 8
-0.004 0.062 -0.243 9
-0.008 0.049 -0.302 6
-0.014 0.022 -0.311 10
-0.002 0.009 -0.291 9
-0.002 0.008 -0.262 8
0.04 -0.013 -0.156 9
0.073 -0.054 0.067 8
0.051 -0.051 0.249 8
0.006 -0.012 0.252 9
-0.025 0.012 0.13 8
-0.022 0.011 0.117 8
-0.04 0.018 0.105 9
-0.043 0.036 -0.122 8
-0.014 0.03 -0.137 7
0.03 -0.014 -0.096 10
0.055 -0.042 -0.073 8
0.056 -0.028 -0.086 9
0.05 -0.025 -0.077 8
0.04 -0.024 -0.068 9
0.04 -0.046 -0.036 8
0.056 -0.056 -0.017 8
0.084 -0.061 -0.017 9
0.1 -0.054 -0.02 8
0.121 -0.026 -0.03 9
0.108 -0.023 -0.027 8
0.148 0.005 -0.063 7
0.187 0.029 -0.104 10
0.222 0.051 -0.141 8
0.261 0.075 -0.17 9
0.297 0.1 -0.18 8
0.279 0.137 -0.182 8
0.251 0.123 -0.164 9
0.159 0.197 -0.166 8
0.0 0.317 -0.179 9
-0.075 0.389 -0.162 8
0.111 0.267 -0.133 8
0.378 0.097 -0.211 9
0.34 0.087 -0.19 6
0.515 0.018 -0.366 10
0.609 -0.02 -0.544 9
0.571 -0.054 -0.503 8
0.417 -0.079 -0.245 9
0.225 -0.051 -0.044 8
0.042 0.009 0.02 8
0.037 0.008 0.018 9
-0.082 0.014 -0.002 8
-0.134 -0.022 -0.026 9
-0.18 -0.038 -0.002 8
-0.239 -0.02 0.088 8
-0.269 -0.017 0.283 7
-0.234 -0.059 0.5 10
-0.21 -0.053 0.45 9
-0.155 -0.108 0.608 8
-0.119 -0.127 0.699 8
-0.098 -0.095 0.679 9
-0.083 -0.033 0.542 8
-0.069 0.053 0.323 9
-0.04 0.138 0.084 8
-0.036 0.124 0.076 8
0.04 0.172 -0.108 9
0.122 0.211 -0.221 8
0.162 0.249 -0.29 7
0.179 0.241 -0.356 10
0.16 0.185 -0.445 8
0.144 0.166 -0.401 9
0.09 0.11 -0.477 8
0.054 0.063 -0.493 8
0.096 0.005 -0.427 9
0.194 -0.088 -0.295 8
0.278 -0.205 -0.202 9
0.32 -0.284 -0.226 8
0.288 -0.256 -0.203 8
0.3 -0.288 -0.344 9
0.295 -0.288 -0.553 7
0.281 -0.275 -0.71 10
0.268 -0.274 -0.751 8
0.26 -0.283 -0.7 8
0.243 -0.313 -0.508 9
0.219 -0.282 -0.457 8
0.198 -0.356 -0.163 9
0.163 -0.393 0.114 8
0.105 -0.35 0.296 8
0.013 -0.286 0.372 9
-0.074 -0.207 0.39 8
-0.067 -0.187 0.351 9
-0.121 -0.128 0.342 6
-0.143 -0.117 0.288 10
-0.115 -0.098 0.2 9
-0.084 -0.068 0.165 8
-0.086 -0.086 0.197 8
-0.1 -0.182 0.22 9
-0.09 -0.163 0.198 8
-0.119 -0.286 0.201 9
-0.163 -0.372 0.216 8
-0.198 -0.411 0.228 8
-0.217 -0.462 0.202 9
-0.23 -0.588 0.148 8
-0.207 -0.53 0.133 7
-0.23 -0.667 0.005 10
-0.28 -0.764 -0.21 8
-0.362 -0.873 -0.453 9
-0.427 -0.96 -0.654 8
-0.462 -0.981 -0.781 9
-0.497 -0.955 -0.82 8
-0.448 -0.859 -0.738 8
-0.493 -0.841 -0.691 9
-0.501 -0.881 -0.652 8
-0.451 -0.983 -0.715 9
-0.371 -1.106 -0.842 8
-0.286 -1.191 -1.001 7
-0.213 -1.215 -1.273 10
-0.191 -1.094 -1.145 8
-0.17 -1.04 -1.485 9
-0.268 -0.908 -1.606 8
-0.471 -0.757 -1.408 8
-0.666 -0.643 -1.086 9
-0.742 -0.555 -0.806 8
-0.673 -0.446 -0.668 8
-0.606 -0.402 -0.601 9
-0.477 -0.325 -0.7 8
-0.322 -0.321 -0.933 9
-0.153 -0.37 -1.104 6
-0.05 -0.419 -1.155 10
-0.149 -0.412 -0.907 9
-0.385 -0.374 -0.159 8
-0.347 -0.336 -0.143 9
-0.328 -0.183 1.078 8
0.153 0.172 2.291 8
0.769 0.51 2.627 9
1.122 0.706 2.074 8
0.977 0.797 1.632 9
0.88 0.717 1.468 8
0.197 0.725 1.725 8
-0.74 0.664 2.659 7
-1.447 0.478 4.116 10
-1.665 0.034 5.58 9
-1.339 -0.719 6.377 8
-0.574 -1.59 6.129 8
-0.517 -1.431 5.516 9
0.326 -2.093 4.416 8
0.835 -2.333 2.907 9
0.864 -2.155 1.601 8
0.563 -1.651 0.762 8
-0.095 -1.023 0.18 9
-0.855 -0.22 -0.051 8
-0.77 -0.198 -0.046 7
-1.33 0.657 0.214 10
-1.566 1.123 0.664 8
-1.398 1.213 0.911 9
-0.951 1.164 0.744 8
-0.483 1.108 0.418 8
-0.434 0.997 0.376 9
-0.243 1.083 0.114 8
-0.341 1.35 -0.143 9
-0.564 1.683 -0.329 8
-0.922 1.977 -0.313 8
-1.277 2.192 -0.162 9
-1.15 1.973 -0.146 6
-1.142 2.086 -0.004 11
-0.789 2.048 0.023 8
-0.234 1.872 -0.183 8
0.416 1.625 -0.601 9
0.952 1.343 -0.959 8
1.249 0.952 -1.069 9
1.271 0.551 -0.97 8
1.144 0.496 -0.873 8
0.955 0.362 -0.598 9
0.632 0.506 -0.082 8
0.343 0.753 0.659 8
0.206 1.056 1.391 7
0.272 1.36 1.617 10
0.516 1.561 1.236 9
0.464 1.405 1.113 8
0.722 1.471 0.595 8
0.929 1.492 0.232 9
1.077 1.459 -0.001 8
1.215 1.221 -0.096 9
1.506 0.897 0.063 8
1.355 0.807 0.057 8
1.73 0.474 0.192 9
1.996 0.067 0.012 8
2.079 -0.367 -0.351 7
1.834 -0.617 -0.51 10
1.16 -0.598 -0.308 8
0.277 -0.466 -0.083 9
0.249 -0.419 -0.075 8
-0.448 -0.308 0.087 9
-0.781 -0.398 0.44 8
-0.747 -0.747 1.038 8
-0.49 -1.253 1.585 9
-0.099 -1.656 2.094 8
0.476 -1.874 2.67 9
0.428 -1.686 2.403 8
0.957 -1.929 2.832 7
1.203 -2.023 2.911 10
1.145 -1.812 2.581 8
0.761 -1.453 1.998 8
0.178 -1.08 1.354 9
0.16 -0.972 0.751 8
-0.357 -0.875 0.676 9
-0.653 -0.09 0.089 8
-0.728 0.156 -0.679 8
-0.633 0.225 -1.51 9
-0.437 0.136 -2.183 8
-0.173 -0.044 -2.688 9
-0.156 -0.039 -2.419 6
0.117 -0.235 -2.739 10
0.357 -0.418 -2.816 9
0.536 -0.587 -2.727 8
0.594 -0.742 -2.523 9
0.53 -0.814 -2.275 8
0.453 -0.712 -2.127 8
0.408 -0.641 -1.915 9
0.362 -0.442 -2.029 8
0.356 -0.277 -2.277 9
0.435 -0.189 -2.44 8
0.535 -0.168 -2.405 8
0.481 -0.196 -2.163 7
0.622 -0.24 -1.815 10
0.56 -0.216 -1.634 9
0.505 -0.261 -1.1 8
0.398 -0.332 -0.44 8
0.239 -0.386 -0.009 9
0.061 -0.35 0.066 8
-0.051 -0.26 -0.159 8
-0.046 -0.234 -0.143 9
-0.12 -0.157 -0.545 8
-0.184 -0.08 -0.852 9
-0.23 -0.023 -0.77 8
-0.203 -0.088 -0.368 7
-0.028 -0.252 -0.05 10
0.209 -0.359 -0.007 8
0.188 -0.323 -0.006 9
0.312 -0.334 -0.116 8
0.203 -0.278 -0.244 8
-0.072 -0.177 -0.259 9
-0.391 -0.104 -0.08 8
-0.701 -0.098 0.166 9
-0.906 -0.055 0.367 8
-0.815 -0.049 0.33 8
-0.936 0.085 0.464 9
-1.072 0.253 0.533 6
-1.253 0.442 0.591 11
-1.356 0.59 0.62 8
-1.276 0.584 0.574 8
-1.066 0.433 0.536 9
-0.96 0.389 0.482 8
-0.726 0.221 0.521 8
-0.531 0.121 0.567 9
-0.39 0.068 0.605 8
-0.307 0.041 0.727 9
-0.332 0.026 1.008 8
-0.299 0.023 0.908 8
-0.351 0.009 1.156 7
-0.368 0.01 1.054 10
-0.376 0.031 0.652 9
-0.339 0.061 0.166 8
-0.299 0.079 -0.171 8
-0.292 0.058 -0.258 9
-0.263 0.052 -0.232 8
-0.272 0.025 -0.172 9
-0.298 0.018 -0.055 8
-0.318 0.019 0.091 8
-0.337 0.009 0.26 9
-0.431 -0.001 0.341 8
-0.388 0.0 0.307 7
-0.495 0.013 0.274 10
-0.524 0.025 0.262 8
-0.448 -0.002 0.3 9
-0.228 -0.069 0.401 8
0.038 -0.121 0.563 8
0.238 -0.131 0.72 9
0.215 -0.118 0.648 8
0.329 -0.105 0.732 9
0.364 -0.059 0.675 8
0.356 -0.011 0.507 8
0.344 0.006 0.273 9
0.364 -0.019 0.097 7
0.419 -0.112 0.05 10
0.377 -0.101 0.045 8
0.404 -0.208 0.043 8
0.354 -0.215 -0.042 9
0.271 -0.127 -0.274 8
0.195 -0.027 -0.593 9
0.17 0.033 -0.82 8
0.201 0.047 -0.737 8
0.181 0.042 -0.663 9
0.21 0.054 -0.389 8
0.192 0.071 -0.139 9
0.17 0.078 0.009 6
0.237 0.077 0.006 10
0.373 0.071 -0.176 9
0.515 0.06 -0.406 8
0.463 0.054 -0.366 9
0.573 0.0 -0.444 8
0.602 -0.102 -0.403 8
0.526 -0.131 -0.441 9
0.423 -0.065 -0.579 8
0.355 0.0 -0.69 9
0.32 0.0 -0.621 8
0.22 0.039 -0.675 8
0.078 0.073 -0.731 7
-0.061 0.112 -0.783 10
-0.159 0.128 -0.784 8
-0.176 0.121 -0.773 9
-0.107 0.111 -0.729 8
-0.096 0.1 -0.656 9
0.011 0.088 -0.534 8
0.089 0.088 -0.354 8
0.12 0.074 -0.184 9
0.124 0.044 -0.09 8
0.099 0.061 -0.065 9
0.06 0.151 -0.04 8
0.054 0.136 -0.036 7
0.025 0.223 -0.002 10
-0.017 0.253 0.011 8
-0.087 0.255 0.013 9
-0.151 0.267 0.075 8
-0.142 0.243 0.199 8
-0.053 0.175 0.398 9
-0.048 0.158 0.358 8
0.019 0.068 0.65 9
0.01 0.009 0.917 8
-0.054 0.07 1.004 8
-0.13 0.183 0.885 9
-0.117 0.165 0.796 6
-0.159 0.273 0.65 10
-0.11 0.325 0.511 9
0.009 0.297 0.383 8
0.073 0.253 0.344 9
0.014 0.255 0.341 8
-0.097 0.329 0.205 8
-0.158 0.365 -0.068 9
-0.142 0.328 -0.061 8
-0.156 0.302 -0.286 9
-0.148 0.296 -0.343 8
-0.11 0.269 -0.312 8
-0.023 0.215 -0.309 7
0.082 0.168 -0.352 10
0.104 0.138 -0.363 9
0.093 0.124 -0.327 8
0.016 0.149 -0.242 8
-0.062 0.198 -0.163 9
-0.055 0.2 -0.179 8
0.022 0.119 -0.25 9
0.078 0.037 -0.295 8
0.07 0.033 -0.266 8
0.076 0.002 -0.287 9
0.031 0.0 -0.304 8
-0.049 0.031 -0.267 7
-0.122 0.068 -0.178 10
-0.167 0.116 -0.086 8
-0.156 0.146 -0.057 9
-0.141 0.132 -0.051 8
-0.052 0.094 -0.095 8
0.035 0.041 -0.108 9
0.036 0.002 -0.081 8
-0.023 0.023 -0.052 9
-0.061 0.066 -0.04 8
-0.066 0.069 -0.09 8
-0.059 0.062 -0.081 9
-0.059 0.08 -0.218 7
-0.051 0.12 -0.452 10
-0.048 0.154 -0.737 8
-0.055 0.176 -0.962 8
-0.041 0.19 -1.012 9
0.026 0.189 -0.842 8
0.023 0.17 -0.758 9
0.124 0.151 -0.484 8
0.2 0.131 -0.313 8
0.244 0.131 -0.356 9
0.275 0.131 -0.552 8
0.304 0.129 -0.776 9
0.273 0.116 -0.698 6
0.247 0.119 -0.802 10
0.179 0.123 -0.737 9
0.224 0.115 -0.606 8
0.365 0.095 -0.403 8
0.462 0.084 -0.145 9
0.495 0.079 0.031 8
0.445 0.071 0.028 9
0.493 0.064 0.002 8
0.564 0.048 -0.127 8
0.589 0.018 -0.225 9
0.537 0.025 -0.275 8
0.467 0.066 -0.221 7
0.416 0.105 0.024 10
0.375 0.095 0.021 8
0.295 0.169 0.363 9
0.199 0.276 0.613 8
0.139 0.343 0.755 9
0.124 0.336 0.786 8
0.132 0.331 0.746 8
0.126 0.35 0.685 9
0.114 0.315 0.616 8
0.086 0.345 0.536 9
0.082 0.383 0.444 8
0.104 0.397 0.38 7
# end
#Thu Feb 26 20:45:33 GMT+08:00 2015 
