# Supplementary material for: Abnormal Gait Behavior Detection for Elderly Based on Enhanced Wigner-Ville Analysis and Cloud Incremental SVM Learning
Source: Hindawi journal article supplement (doi:10.1155/2016/5869238), 2016-01-01
Supplement: f1 [file 5869238.f1.zip › Supplementary Materials/Original Data/Slipping against a wall ending in sitting position/original__169.txt]

# Accelerometer Values
# filename:  original__169.txt
# Saving start time: Thu Feb 26 20:45:35 GMT+08:00 2015

# sensor resolution: 0.0095825195m/s^2
#Sensorvendor: KIONIX, name: KX023 Accelerometer, type: 1,version : 1, range 39.240005

# X value, Y value, Z value, time diff in ms
0.023 0.083 -0.495 9
-0.068 0.182 -0.69 8
-0.151 0.261 -0.771 8
-0.167 0.296 -0.726 9
-0.151 0.267 -0.653 8
-0.09 0.224 -0.482 7
-0.008 0.119 -0.186 10
0.044 0.018 0.101 8
0.063 -0.046 0.242 9
0.076 -0.095 0.231 8
0.095 -0.123 0.128 8
0.086 -0.11 0.116 9
0.088 -0.107 0.032 8
0.039 -0.074 -0.021 9
-0.017 -0.033 -0.073 8
-0.002 -0.024 -0.071 8
0.062 -0.059 -0.018 9
0.056 -0.053 -0.017 7
0.09 -0.068 0.0 10
0.074 -0.051 -0.033 8
0.034 -0.043 -0.099 8
-0.025 -0.033 -0.147 9
-0.063 -0.006 -0.089 8
-0.059 -0.004 0.021 9
-0.053 -0.003 0.019 8
-0.017 -0.028 0.073 8
0.041 -0.048 0.08 9
0.071 -0.054 0.104 8
0.064 -0.022 0.125 9
0.063 0.022 0.141 6
0.098 0.032 0.166 10
0.088 0.028 0.149 9
0.133 -0.001 0.143 8
0.156 -0.03 0.077 8
0.144 -0.013 -0.039 9
0.115 0.021 -0.204 8
0.092 0.048 -0.356 9
0.073 0.077 -0.429 8
0.066 0.069 -0.386 8
0.061 0.079 -0.394 9
0.067 0.053 -0.328 8
0.068 0.023 -0.145 7
0.058 0.004 0.069 10
0.048 -0.005 0.145 8
0.043 -0.005 0.131 9
0.045 0.0 0.082 8
0.061 -0.013 0.003 9
0.074 -0.05 -0.035 8
0.061 -0.058 -0.013 8
0.03 -0.04 0.029 9
0.007 -0.022 0.073 8
0.006 -0.02 0.066 9
-0.008 0.001 0.108 8
-0.012 0.01 0.163 7
-0.012 0.012 0.21 10
-0.019 0.031 0.2 8
-0.043 0.05 0.096 9
-0.057 0.066 -0.027 8
-0.051 0.06 -0.024 8
-0.043 0.052 -0.018 9
-0.033 0.015 0.055 8
-0.019 -0.002 0.098 8
-0.003 -0.008 0.124 9
0.002 -0.016 0.114 8
0.001 0.011 0.033 9
0.001 0.01 0.03 6
-0.002 0.055 -0.115 10
0.015 0.046 -0.219 9
0.015 0.023 -0.225 8
-0.012 0.028 -0.211 9
-0.029 0.047 -0.184 8
-0.026 0.042 -0.165 8
-0.013 0.033 -0.082 9
0.001 -0.004 0.026 8
-0.006 -0.012 0.103 9
-0.019 0.013 0.145 8
-0.013 0.006 0.19 8
-0.012 0.005 0.171 7
0.01 -0.043 0.215 10
0.026 -0.074 0.216 9
0.041 -0.086 0.178 8
0.068 -0.11 0.139 8
0.085 -0.135 0.079 9
0.073 -0.112 -0.009 8
0.049 -0.071 -0.04 8
0.044 -0.063 -0.036 9
0.027 -0.051 -0.005 8
0.026 -0.048 0.015 9
0.038 -0.045 0.06 8
0.039 -0.046 0.142 7
0.033 -0.04 0.175 10
0.037 -0.028 0.123 8
0.033 -0.026 0.111 9
0.052 -0.04 0.041 8
0.061 -0.062 0.0 8
0.041 -0.042 -0.066 9
0.015 0.012 -0.198 8
-0.008 0.067 -0.345 9
-0.007 0.06 -0.311 8
-0.025 0.108 -0.401 8
-0.016 0.131 -0.421 9
0.031 0.097 -0.35 6
0.109 0.029 -0.13 11
0.159 -0.032 0.14 8
0.157 -0.082 0.327 8
0.142 -0.074 0.294 9
0.097 -0.091 0.362 8
0.054 -0.073 0.296 9
0.062 -0.043 0.155 8
0.136 -0.004 -0.018 8
0.245 0.023 -0.178 9
0.344 0.041 -0.267 8
0.309 0.037 -0.24 8
0.376 0.034 -0.252 7
0.398 0.024 -0.248 10
0.392 0.021 -0.275 9
0.383 0.025 -0.303 8
0.384 0.05 -0.315 8
0.345 0.045 -0.316 9
0.369 0.04 -0.284 8
0.416 0.159 -0.293 9
0.466 0.187 -0.342 8
0.55 0.179 -0.454 8
0.649 0.172 -0.592 9
0.628 0.182 -0.671 8
0.565 0.163 -0.604 7
0.415 0.195 -0.584 10
0.184 0.255 -0.534 8
-0.093 0.307 -0.48 9
-0.267 0.294 -0.431 8
-0.255 0.216 -0.383 9
-0.096 0.061 -0.313 8
-0.087 0.055 -0.282 8
0.147 -0.125 -0.355 9
0.399 -0.2 -0.562 8
0.556 -0.216 -0.753 8
0.509 -0.252 -0.807 9
0.353 -0.256 -0.741 7
0.206 -0.218 -0.653 10
0.185 -0.197 -0.588 8
0.026 -0.155 -0.481 8
-0.186 -0.105 -0.376 9
-0.361 -0.054 -0.236 8
-0.432 -0.036 0.031 9
-0.402 -0.041 0.313 8
-0.282 -0.015 0.391 8
-0.253 -0.013 0.352 9
-0.104 0.049 0.241 8
0.011 0.064 0.067 9
0.076 -0.016 -0.041 6
0.1 -0.148 0.005 10
0.091 -0.272 0.173 9
0.082 -0.348 0.369 8
0.074 -0.313 0.332 9
-0.021 -0.371 0.469 8
0.0 -0.422 0.492 8
0.053 -0.418 0.365 9
0.08 -0.358 0.167 8
0.055 -0.299 0.061 9
0.049 -0.269 0.055 8
-0.069 -0.269 0.06 8
-0.241 -0.309 0.127 7
-0.379 -0.36 0.225 10
-0.453 -0.478 0.304 8
-0.465 -0.661 0.326 9
-0.437 -0.831 0.252 8
-0.393 -0.747 0.226 9
-0.331 -0.87 -0.002 8
-0.253 -0.923 -0.316 9
-0.182 -0.916 -0.529 8
-0.118 -0.865 -0.597 8
-0.014 -0.798 -0.604 9
0.153 -0.729 -0.609 8
0.138 -0.656 -0.548 7
0.307 -0.632 -0.678 10
0.511 -0.638 -0.916 8
0.716 -0.677 -1.121 9
0.807 -0.761 -1.241 8
0.723 -0.83 -1.199 8
0.468 -0.787 -0.952 9
0.421 -0.708 -0.857 8
0.012 -0.551 -0.437 9
-0.561 -0.388 0.162 8
-1.147 -0.245 0.929 8
-1.529 -0.116 1.631 9
-1.376 -0.104 1.468 6
-1.479 -0.017 1.807 11
-1.39 0.013 1.568 8
-1.043 0.085 1.058 8
-0.405 0.421 0.69 9
0.132 0.923 0.25 8
0.232 1.217 -0.168 8
-0.038 1.125 -0.033 9
-0.034 1.012 -0.029 8
-0.468 0.587 0.717 9
-0.796 0.042 1.749 8
-0.903 -0.47 2.821 8
-0.911 -1.047 3.58 7
-0.955 -1.614 3.594 10
-1.064 -1.919 2.787 9
-0.958 -1.727 2.508 8
-1.052 -1.747 1.284 8
-1.076 -1.625 0.073 9
-0.993 -1.531 -0.855 8
-0.786 -1.482 -1.509 9
-0.626 -1.453 -1.757 8
-0.564 -1.308 -1.386 8
-0.633 -1.177 -1.247 9
-0.76 -1.55 -0.517 8
-0.782 -1.784 0.203 7
-0.725 -1.915 0.747 10
-0.587 -1.703 1.085 8
-0.39 -1.185 1.246 9
-0.351 -1.066 1.121 8
-0.117 -0.504 1.163 8
0.106 0.084 1.206 9
0.224 0.635 1.394 8
0.138 1.072 1.763 9
-0.179 1.428 2.386 8
-0.612 1.656 3.05 8
-0.551 1.49 2.745 9
-0.862 1.662 2.977 7
-0.821 1.804 2.742 10
-0.462 1.892 2.4 8
0.078 1.96 1.927 8
0.671 2.177 1.309 9
1.016 2.415 0.706 8
0.914 2.173 0.635 9
0.819 2.302 0.194 8
0.433 2.37 0.177 8
-0.001 2.319 0.634 9
-0.194 2.154 1.115 8
0.033 2.065 1.257 9
0.029 1.858 1.131 6
0.515 1.955 0.774 10
0.963 2.145 -0.132 9
1.19 2.309 -1.286 8
1.213 2.415 -2.285 9
1.169 2.603 -2.996 8
1.326 2.795 -3.603 8
1.193 2.516 -3.243 9
1.647 2.489 -3.763 8
2.19 2.068 -3.86 8
2.652 1.443 -3.291 9
2.684 0.701 -2.066 8
2.231 -0.127 -0.355 7
1.642 -0.682 1.582 10
1.478 -0.614 1.424 8
0.877 -0.928 3.023 9
0.405 -1.205 3.541 8
0.202 -1.463 2.833 9
0.124 -1.603 1.503 8
0.056 -1.593 0.259 8
0.025 -1.582 -0.582 9
0.023 -1.423 -0.523 8
0.074 -1.577 -0.709 9
0.235 -1.821 -0.179 8
0.458 -2.121 0.808 7
0.683 -2.452 1.94 10
0.868 -2.732 2.947 8
0.937 -2.882 3.587 9
0.843 -2.594 3.229 8
0.775 -2.495 3.336 8
0.612 -2.201 2.916 9
0.359 -1.816 2.284 8
0.039 -1.441 1.762 9
-0.224 -1.156 1.365 8
-0.201 -1.04 1.229 8
-0.292 -0.83 0.866 9
-0.232 -0.684 0.443 6
-0.169 -0.511 -0.074 10
-0.196 -0.249 -0.567 9
-0.288 0.028 -0.996 8
-0.424 0.231 -1.378 9
-0.382 0.208 -1.24 8
-0.54 0.306 -1.464 8
-0.627 0.294 -1.538 9
-0.55 0.176 -1.593 8
-0.351 0.037 -1.687 9
-0.069 -0.109 -1.791 8
0.265 -0.277 -1.853 8
0.238 -0.249 -1.668 7
0.504 -0.358 -1.777 10
0.64 -0.375 -1.935 9
0.681 -0.308 -2.068 8
0.664 -0.174 -2.272 8
0.597 -0.007 -2.516 9
0.481 0.135 -2.563 8
0.433 0.122 -2.307 9
0.301 0.172 -2.052 8
0.216 0.118 -1.605 8
0.221 -0.052 -1.126 9
0.284 -0.258 -0.655 8
0.256 -0.232 -0.589 7
0.318 -0.375 -0.203 10
0.353 -0.471 -0.182 8
0.35 -0.487 -0.264 9
0.281 -0.441 -0.405 8
0.052 -0.351 -0.493 8
-0.378 -0.145 -0.44 9
-0.908 0.114 -0.158 8
-0.817 0.103 -0.142 9
-1.261 0.287 0.262 8
-1.488 0.344 0.474 8
-1.524 0.347 0.413 9
-1.278 0.271 -0.131 6
-0.847 0.133 -0.862 11
-0.562 -0.008 -1.143 8
-0.505 -0.008 -1.029 8
-0.442 -0.216 -0.744 9
-0.413 -0.462 0.019 8
-0.457 -0.628 1.028 9
-0.593 -0.541 1.938 8
-0.666 -0.199 2.227 8
-0.586 0.15 1.872 9
-0.528 0.135 1.685 8
-0.279 0.372 0.825 9
0.006 0.532 -0.055 6
0.102 0.597 -0.491 10
-0.032 0.597 -0.669 9
-0.207 0.582 -0.697 8
-0.355 0.557 -0.516 8
-0.32 0.502 -0.465 9
-0.423 0.44 -0.098 8
-0.414 0.371 0.203 9
-0.273 0.286 0.321 8
0.026 0.122 0.222 8
0.335 -0.011 -0.121 9
0.301 -0.01 -0.109 8
0.441 -0.014 -0.498 7
0.458 0.028 -0.688 10
0.386 0.022 -0.615 8
0.292 -0.023 -0.33 9
0.19 -0.017 -0.071 8
0.058 0.037 0.099 9
0.052 0.033 0.089 8
-0.008 0.08 0.173 8
-0.051 0.129 0.101 9
-0.112 0.178 -0.033 8
-0.113 0.196 -0.097 9
-0.078 0.191 -0.056 8
-0.07 0.172 -0.051 7
-0.027 0.164 0.054 10
0.066 0.151 0.158 8
0.226 0.135 0.234 9
0.368 0.119 0.285 8
0.431 0.109 0.266 8
0.421 0.111 0.136 9
0.376 0.123 -0.074 8
0.338 0.11 -0.066 8
0.291 0.148 -0.289 9
0.238 0.245 -0.455 8
0.148 0.345 -0.493 9
0.041 0.39 -0.448 6
-0.013 0.387 -0.407 10
-0.011 0.348 -0.366 9
0.0 0.294 -0.344 8
0.013 0.23 -0.319 9
-0.048 0.229 -0.255 8
-0.18 0.261 -0.014 8
-0.348 0.232 0.397 9
-0.523 0.233 0.735 8
-0.471 0.209 0.661 9
-0.623 0.336 0.706 8
-0.725 0.488 0.515 8
-0.784 0.57 0.237 7
-0.778 0.587 -0.035 10
-0.653 0.544 -0.192 9
-0.457 0.43 -0.198 8
-0.412 0.387 -0.179 8
-0.243 0.269 0.024 9
-0.136 0.202 0.292 8
-0.069 0.161 0.432 8
0.014 0.122 0.444 9
0.124 0.073 0.387 8
0.258 -0.002 0.21 9
0.232 -0.002 0.189 8
0.398 -0.07 -0.138 7
0.517 -0.107 -0.445 10
0.537 -0.125 -0.607 8
0.48 -0.092 -0.649 9
0.345 -0.018 -0.591 8
0.31 -0.016 -0.531 8
0.087 0.059 -0.478 9
-0.147 0.116 0.038 8
-0.261 0.144 0.075 9
-0.219 0.139 -0.106 8
-0.09 0.136 -0.341 8
0.059 0.166 -0.654 9
0.053 0.15 -0.588 6
0.21 0.178 -0.93 11
0.33 0.11 -1.102 8
0.335 -0.007 -0.996 8
0.193 0.004 -0.678 9
0.03 0.066 -0.346 8
-0.044 0.035 -0.135 9
-0.04 0.031 -0.121 8
-0.06 0.012 -0.025 8
-0.073 0.077 -0.077 9
-0.121 0.158 -0.318 8
-0.184 0.205 -0.635 8
-0.173 0.233 -0.947 7
-0.008 0.222 -1.146 10
-0.007 0.2 -1.032 9
0.219 0.151 -1.062 8
0.365 -0.011 -0.924 8
0.366 -0.064 -0.505 9
0.184 0.055 -0.006 8
0.054 0.08 0.305 9
0.048 0.042 0.354 8
0.043 0.038 0.319 8
0.253 0.05 0.062 9
0.335 0.098 -0.297 8
0.428 0.166 -0.68 7
0.494 0.352 -1.03 10
0.486 0.595 -1.197 8
0.437 0.535 -1.077 9
0.435 0.733 -1.123 8
0.487 0.86 -1.117 9
# end
#Thu Feb 26 20:45:38 GMT+08:00 20150
