# Supplementary material for: Abnormal Gait Behavior Detection for Elderly Based on Enhanced Wigner-Ville Analysis and Cloud Incremental SVM Learning
Source: Hindawi journal article supplement (doi:10.1155/2016/5869238), 2016-01-01
Supplement: f1 [file 5869238.f1.zip › Supplementary Materials/Original Data/Slipping against a wall ending in sitting position/original__170.txt]

# Accelerometer Values
# filename:  original__170.txt
# Saving start time: Thu Feb 26 20:45:40 GMT+08:00 2015

# sensor resolution: 0.0095825195m/s^2
#Sensorvendor: KIONIX, name: KX023 Accelerometer, type: 1,version : 1, range 39.240005

# X value, Y value, Z value, time diff in ms
0.407 -0.14 0.211 10
0.629 -0.286 -0.091 8
0.632 -0.328 -0.336 9
0.419 -0.234 -0.496 8
0.377 -0.211 -0.447 8
0.104 -0.068 -0.611 9
-0.112 0.055 -0.721 8
-0.234 0.137 -0.668 9
-0.254 0.17 -0.487 8
-0.216 0.125 -0.263 8
-0.194 0.112 -0.237 9
-0.157 0.029 0.019 7
-0.141 -0.022 0.156 10
-0.12 -0.041 0.083 8
-0.089 -0.062 -0.044 8
-0.079 -0.065 -0.134 9
-0.098 0.0 -0.202 8
-0.088 0.0 -0.181 9
-0.113 0.091 -0.254 8
-0.116 0.123 -0.293 8
-0.127 0.104 -0.234 9
-0.198 0.078 -0.075 8
-0.25 0.066 0.105 9
-0.225 0.06 0.094 6
-0.16 -0.009 0.266 10
-0.05 -0.135 0.402 9
0.015 -0.204 0.442 8
0.049 -0.217 0.418 8
0.091 -0.226 0.39 9
0.141 -0.244 0.388 8
0.165 -0.265 0.389 9
0.148 -0.238 0.35 8
0.152 -0.244 0.331 8
0.145 -0.231 0.3 9
0.09 -0.183 0.271 8
0.015 -0.09 0.21 7
-0.009 -0.023 0.072 10
-0.008 -0.021 -0.084 8
0.008 -0.019 -0.075 9
0.026 -0.038 -0.207 8
0.018 -0.013 -0.307 9
0.016 0.017 -0.364 8
0.045 0.005 -0.377 8
0.074 -0.008 -0.364 9
0.066 -0.007 -0.328 8
0.093 -0.01 -0.289 9
0.088 -0.03 -0.136 8
0.025 -0.037 0.082 7
-0.038 -0.006 0.211 10
-0.068 0.02 0.218 8
-0.068 0.042 0.112 9
-0.061 0.038 0.101 8
-0.054 0.069 -0.055 8
-0.044 0.089 -0.175 9
-0.024 0.069 -0.218 8
0.009 0.006 -0.17 8
0.042 -0.051 -0.076 9
0.052 -0.089 0.04 8
0.047 -0.08 0.036 9
0.041 -0.116 0.188 6
0.017 -0.117 0.331 10
-0.008 -0.073 0.42 9
-0.007 -0.03 0.414 8
0.007 0.0 0.3 9
0.032 0.016 0.123 8
0.029 0.014 0.111 8
0.079 0.01 -0.074 9
0.158 -0.008 -0.227 8
0.238 -0.033 -0.284 9
0.295 -0.083 -0.173 8
0.351 -0.182 0.042 8
0.315 -0.163 0.038 7
0.393 -0.287 0.203 10
0.431 -0.381 0.268 9
0.351 -0.32 0.187 8
0.186 -0.113 -0.08 8
0.027 0.089 -0.398 9
-0.047 0.202 -0.753 8
-0.042 0.182 -0.677 9
0.035 0.129 -0.94 8
0.197 -0.05 -1.025 8
0.247 -0.241 -1.054 9
0.166 -0.379 -1.015 8
0.096 -0.453 -0.984 7
0.103 -0.505 -0.979 10
0.093 -0.454 -0.881 8
0.149 -0.532 -0.83 9
0.147 -0.539 -0.706 8
0.029 -0.428 -0.587 8
-0.136 -0.257 -0.469 9
-0.27 -0.045 -0.352 8
-0.333 0.173 -0.258 9
-0.3 0.156 -0.232 8
-0.307 0.314 -0.149 8
-0.266 0.387 -0.042 9
-0.179 0.415 0.072 6
-0.046 0.411 0.162 11
0.156 0.388 0.211 8
0.141 0.349 0.19 8
0.355 0.349 0.171 9
0.477 0.366 0.168 8
0.497 0.367 0.172 9
0.429 0.319 0.267 8
0.296 0.229 0.405 8
0.141 0.141 0.516 9
0.127 0.127 0.464 8
0.031 -0.003 0.641 8
0.028 -0.208 0.878 7
0.099 -0.4 1.066 10
0.192 -0.52 1.117 9
0.246 -0.586 0.908 8
0.246 -0.602 0.482 8
0.221 -0.542 0.434 9
0.157 -0.573 -0.018 8
0.039 -0.699 -0.385 9
-0.106 -0.895 -0.646 8
-0.24 -1.049 -0.805 8
-0.3 -1.151 -0.86 9
-0.253 -1.317 -0.851 8
-0.227 -1.185 -0.766 7
-0.085 -1.439 -0.783 10
0.104 -1.703 -0.897 8
0.256 -1.874 -1.076 9
0.35 -1.86 -1.193 8
0.42 -1.698 -1.256 9
0.378 -1.528 -1.13 8
0.41 -1.361 -1.017 8
0.354 -1.245 -1.568 9
0.218 -1.141 -1.643 8
0.003 -1.035 -1.331 8
-0.215 -0.93 -0.688 9
-0.194 -0.837 -0.62 7
-0.355 -0.725 -0.013 10
-0.472 -0.567 0.389 8
-0.552 -0.363 0.529 8
-0.623 -0.128 0.375 9
-0.768 0.152 0.101 8
-1.012 0.444 -0.021 9
-1.199 0.659 0.12 8
-1.079 0.593 0.108 8
-1.119 0.695 0.496 9
-0.976 0.702 1.031 8
-0.661 0.653 1.362 9
-0.336 0.594 1.283 6
-0.199 0.591 0.956 10
-0.381 0.793 0.684 9
-0.342 0.713 0.616 8
-0.795 1.097 0.656 9
-1.225 1.443 1.039 8
-1.299 1.584 1.557 8
-0.922 1.375 2.003 9
-0.265 0.914 2.199 8
-0.239 0.404 1.986 9
-0.215 0.364 1.787 8
1.125 -0.064 1.379 8
1.287 -0.511 1.089 7
0.917 -1.049 1.184 10
0.104 -1.303 1.768 8
-0.765 -1.036 2.705 9
-0.689 -0.932 2.434 8
-1.394 -0.378 3.297 9
-1.716 0.326 3.607 8
-1.551 1.047 3.151 8
-1.114 1.554 2.128 9
-0.582 1.786 1.192 8
-0.035 1.794 0.723 9
-0.032 1.615 0.65 8
0.589 1.521 0.535 7
1.254 1.361 0.52 10
1.736 1.179 0.415 8
1.777 1.173 -0.059 9
1.234 1.571 -0.919 8
0.243 2.322 -1.674 8
0.219 2.089 -1.506 9
-0.994 3.004 -1.658 8
-2.072 3.765 -1.032 9
-2.522 3.925 0.072 8
-2.204 3.319 1.22 8
-1.374 2.295 2.045 9
-1.236 2.066 1.84 6
-0.174 0.938 2.023 10
1.217 -0.096 1.662 9
2.821 -0.747 0.876 8
3.96 -0.982 -0.447 9
4.21 -0.949 -1.96 8
3.239 -0.666 -2.814 8
2.915 -0.599 -2.533 9
0.874 -0.04 -1.941 8
-1.421 0.408 0.001 9
-3.046 0.316 2.61 8
-3.532 -0.428 4.928 8
-2.993 -1.548 6.04 7
-1.857 -2.432 5.87 10
-1.671 -2.189 5.283 9
-0.612 -2.707 4.474 8
-0.061 -2.953 3.546 8
0.0 -2.946 2.759 9
-0.267 -2.788 2.215 8
-0.603 -2.667 1.924 9
-0.817 -2.519 1.944 8
-0.735 -2.267 1.749 8
-0.953 -1.899 2.066 9
-1.051 -1.332 2.252 8
-0.81 -0.836 1.828 7
-0.21 -0.561 0.741 10
0.555 -0.4 -0.633 8
0.499 -0.36 -0.569 9
1.26 -0.281 -1.851 8
2.007 -0.328 -2.756 8
2.659 -0.595 -3.256 9
3.149 -1.08 -3.409 8
3.392 -1.539 -3.282 9
3.194 -1.751 -2.977 8
2.875 -1.576 -2.679 8
2.291 -1.535 -2.292 9
1.498 -1.221 -2.089 7
0.728 -0.716 -2.317 10
0.135 -0.194 -2.994 8
-0.132 0.248 -3.887 8
-0.029 0.54 -4.807 9
-0.026 0.486 -4.327 8
0.357 0.625 -5.04 9
0.819 0.599 -5.119 8
1.145 0.404 -4.437 8
1.203 0.182 -3.272 9
0.814 0.0 -2.068 8
0.733 0.0 -1.861 9
-0.072 -0.016 -0.923 6
-1.023 0.2 -0.366 10
-1.803 0.534 -0.088 9
-2.139 0.804 -0.09 8
-1.956 0.826 -0.417 9
-1.397 0.632 -0.874 8
-1.257 0.569 -0.787 8
-0.553 0.326 -1.083 9
0.009 0.127 -1.107 8
0.173 0.013 -0.706 8
-0.424 0.1 1.031 9
-1.221 0.366 2.325 8
-1.099 0.329 2.093 7
-1.292 0.644 1.704 10
-1.164 0.833 1.081 8
-1.223 0.95 0.774 9
-1.196 1.175 0.54 8
-0.871 1.278 0.261 9
-0.554 1.025 0.179 8
-0.263 0.691 0.155 8
-0.237 0.622 0.14 9
0.035 0.425 0.116 8
0.289 0.245 0.068 9
0.477 0.036 0.065 8
0.552 -0.167 0.109 7
0.48 -0.296 0.188 10
0.432 -0.266 0.169 8
0.219 -0.332 0.261 9
-0.066 -0.25 0.285 8
-0.182 -0.017 0.185 8
-0.053 0.131 0.029 9
0.154 0.218 -0.198 8
0.333 0.278 -0.314 9
0.3 0.25 -0.282 8
0.483 0.107 -0.113 8
0.691 -0.122 0.234 9
0.873 -0.298 0.613 6
0.979 -0.454 0.818 10
0.992 -0.557 0.805 9
0.916 -0.58 0.758 8
0.825 -0.522 0.682 9
0.606 -0.423 0.72 8
0.28 -0.178 0.745 8
0.004 0.147 0.707 9
-0.107 0.385 0.549 8
-0.05 0.485 0.218 9
-0.045 0.436 0.197 8
0.112 0.473 -0.182 8
0.317 0.45 -0.466 7
0.471 0.367 -0.701 10
0.523 0.305 -0.936 9
0.54 0.259 -1.018 8
0.617 0.093 -0.811 8
0.555 0.083 -0.73 9
0.711 -0.103 -0.466 8
0.829 -0.165 -0.377 9
0.771 -0.071 -0.483 8
0.545 0.093 -0.654 8
0.318 0.192 -0.706 9
0.162 0.244 -0.603 8
0.146 0.22 -0.542 7
0.072 0.244 -0.344 10
0.077 0.238 -0.139 8
0.133 0.165 0.024 9
0.24 0.038 0.135 8
0.334 -0.006 0.147 8
0.301 -0.005 0.132 9
0.288 0.058 -0.044 8
0.191 0.14 -0.368 9
0.112 0.201 -0.602 8
0.136 0.212 -0.561 8
0.274 0.174 -0.3 9
0.247 0.157 -0.27 7
0.397 0.106 0.036 10
0.463 0.071 0.267 8
0.435 0.07 0.408 8
0.302 0.081 0.456 9
0.155 0.107 0.425 8
0.035 0.172 0.341 9
-0.088 0.287 0.237 8
-0.079 0.258 0.213 8
-0.156 0.345 0.072 9
-0.134 0.329 -0.11 8
-0.042 0.235 -0.171 9
0.027 0.112 -0.043 6
0.052 0.026 0.122 10
0.038 0.0 0.228 9
0.034 0.0 0.206 8
0.015 -0.02 0.252 8
0.065 -0.049 0.279 9
0.089 -0.04 0.235 8
0.013 0.072 0.023 9
-0.065 0.228 -0.274 8
-0.059 0.205 -0.246 8
-0.126 0.35 -0.531 9
-0.196 0.483 -0.662 8
-0.244 0.527 -0.532 7
-0.23 0.457 -0.427 10
-0.167 0.336 -0.495 8
-0.116 0.247 -0.52 9
-0.104 0.223 -0.468 8
-0.086 0.17 -0.339 9
-0.031 0.055 -0.132 8
0.057 -0.092 0.04 8
0.054 -0.159 0.153 9
-0.048 -0.078 0.28 8
-0.226 0.083 0.464 9
-0.203 0.074 0.418 8
-0.409 0.206 0.504 7
-0.502 0.275 0.362 10
-0.461 0.269 0.152 8
-0.366 0.209 0.104 9
-0.294 0.092 0.203 8
-0.281 -0.07 0.308 8
-0.253 -0.063 0.277 9
-0.275 -0.212 0.379 8
-0.3 -0.278 0.448 8
-0.309 -0.261 0.477 9
-0.267 -0.214 0.452 8
-0.144 -0.197 0.319 9
-0.129 -0.177 0.287 6
-0.041 -0.192 0.115 10
-0.086 -0.175 -0.026 9
-0.197 -0.131 -0.103 8
-0.286 -0.131 -0.129 9
-0.298 -0.171 -0.172 8
-0.251 -0.168 -0.262 8
-0.226 -0.151 -0.235 9
-0.125 -0.129 -0.437 8
0.05 -0.144 -0.685 9
0.217 -0.146 -0.93 8
0.33 -0.133 -1.245 8
0.469 -0.149 -1.469 7
0.602 -0.173 -1.397 10
0.542 -0.156 -1.258 9
0.63 -0.225 -0.869 8
0.654 -0.318 -0.337 8
0.527 -0.31 -0.07 9
0.336 -0.233 -0.187 8
0.215 -0.159 -0.511 9
0.194 -0.143 -0.46 8
0.126 -0.056 -0.786 8
0.107 0.134 -0.943 9
0.217 0.458 -0.987 8
0.45 0.837 -0.974 7
0.689 1.215 -0.919 10
0.912 1.532 -0.826 8
0.821 1.379 -0.743 9
1.059 1.563 -0.634 8
# end
#Thu Feb 26 20:45:43 GMT+08:00 20153
