# Supplementary material for: Abnormal Gait Behavior Detection for Elderly Based on Enhanced Wigner-Ville Analysis and Cloud Incremental SVM Learning
Source: Hindawi journal article supplement (doi:10.1155/2016/5869238), 2016-01-01
Supplement: f1 [file 5869238.f1.zip › Supplementary Materials/Original Data/Squatting/original__22.txt]

# Accelerometer Values
# filename:  original__22.txt
# Saving start time: Thu Feb 26 20:20:39 GMT+08:00 2015

# sensor resolution: 0.0095825195m/s^2
#Sensorvendor: KIONIX, name: KX023 Accelerometer, type: 1,version : 1, range 39.240005

# X value, Y value, Z value, time diff in ms
-0.042 -0.031 -0.212 9
-0.037 -0.028 -0.191 8
0.061 -0.056 -0.105 9
0.119 -0.084 0.018 8
0.137 -0.096 0.14 8
0.133 -0.082 0.221 7
0.12 -0.059 0.238 10
0.108 -0.053 0.214 9
0.082 -0.036 0.193 8
0.053 -0.013 0.147 8
0.037 0.018 0.086 9
0.023 0.045 0.023 8
0.012 0.067 -0.006 8
0.015 0.089 0.001 9
0.014 0.08 0.001 8
0.032 0.072 0.021 9
0.049 0.029 0.061 8
0.056 0.006 0.138 7
0.058 0.002 0.252 10
0.07 -0.031 0.325 8
0.104 -0.1 0.296 9
0.094 -0.09 0.266 8
0.128 -0.146 0.169 8
0.134 -0.156 0.061 9
0.12 -0.172 -0.024 8
0.105 -0.2 -0.093 9
0.086 -0.203 -0.179 8
0.055 -0.202 -0.265 8
0.049 -0.182 -0.238 9
0.009 -0.186 -0.291 6
-0.023 -0.193 -0.318 11
-0.046 -0.205 -0.318 8
-0.057 -0.219 -0.306 8
-0.048 -0.26 -0.274 9
-0.031 -0.317 -0.22 8
-0.028 -0.285 -0.198 8
-0.025 -0.361 -0.133 9
-0.027 -0.465 -0.054 8
-0.024 -0.559 0.048 9
-0.031 -0.613 0.153 8
-0.038 -0.645 0.237 8
-0.034 -0.58 0.213 7
-0.027 -0.623 0.268 10
-0.019 -0.659 0.26 9
-0.017 -0.673 0.176 8
-0.032 -0.673 0.014 8
-0.053 -0.685 -0.167 9
-0.076 -0.762 -0.276 8
-0.111 -0.916 -0.316 9
-0.1 -0.824 -0.284 8
-0.147 -1.032 -0.285 8
-0.2 -1.205 -0.224 9
-0.243 -1.336 -0.042 8
-0.241 -1.475 0.192 7
-0.218 -1.589 0.265 10
-0.205 -1.644 0.162 8
-0.184 -1.48 0.146 9
-0.158 -1.462 -0.096 8
-0.079 -1.381 -0.412 8
0.058 -1.305 -0.673 9
0.163 -1.156 -0.927 8
0.231 -1.026 -1.157 9
0.279 -0.981 -1.358 8
0.251 -0.883 -1.223 8
0.262 -0.822 -1.315 9
0.229 -0.747 -1.113 7
0.143 -0.642 -0.761 10
0.037 -0.495 -0.419 8
-0.035 -0.267 -0.158 8
-0.031 -0.24 -0.143 9
-0.048 0.051 -0.101 8
-0.021 0.299 -0.272 9
0.043 0.489 -0.605 8
0.12 0.716 -0.987 8
0.185 0.933 -1.28 9
0.228 1.068 -1.381 8
0.205 0.961 -1.243 9
0.182 1.057 -1.005 6
0.074 1.113 -0.383 10
-0.1 1.154 0.428 9
-0.313 1.197 1.225 8
-0.498 1.239 1.782 9
-0.585 1.343 1.948 8
-0.526 1.209 1.753 8
-0.49 1.341 1.477 9
-0.332 1.395 0.841 8
-0.132 1.446 0.163 8
-0.024 1.466 -0.242 9
-0.049 1.336 -0.174 8
-0.044 1.202 -0.156 7
-0.122 0.987 0.169 10
-0.162 0.79 0.624 8
-0.168 0.653 1.099 9
-0.116 0.565 1.357 8
0.024 0.514 1.356 9
0.171 0.491 1.11 8
0.212 0.479 0.656 8
0.191 0.431 0.59 9
0.104 0.439 0.17 8
-0.026 0.487 -0.031 9
-0.132 0.531 0.03 8
-0.219 0.565 0.332 7
-0.239 0.631 0.685 10
-0.176 0.721 0.973 8
-0.158 0.649 0.875 9
-0.061 0.728 0.998 8
0.046 0.82 0.843 8
0.128 1.007 0.523 9
0.147 1.253 0.173 8
0.128 1.492 -0.078 9
0.134 1.698 -0.014 8
0.12 1.528 -0.013 8
0.142 1.667 0.42 9
0.138 1.728 1.085 6
0.118 1.681 1.839 10
0.108 1.6 2.555 9
0.088 1.566 3.069 8
0.053 1.626 3.21 9
0.048 1.463 2.889 8
0.057 1.67 2.616 8
0.108 1.817 1.933 9
0.14 1.787 1.039 8
0.109 1.634 0.244 9
0.03 1.388 -0.226 8
-0.051 1.059 -0.366 8
-0.045 0.953 -0.329 7
-0.095 0.606 -0.276 10
-0.127 0.308 -0.217 9
-0.158 0.112 -0.278 8
-0.193 0.004 -0.435 8
-0.216 -0.08 -0.709 9
-0.194 -0.072 -1.066 8
-0.167 -0.26 -0.959 9
-0.115 -0.539 -1.366 8
-0.05 -0.733 -1.702 8
-0.037 -0.791 -1.809 9
-0.098 -0.795 -1.609 8
-0.088 -0.715 -1.448 7
-0.219 -0.693 -0.937 10
-0.392 -0.653 -0.287 8
-0.515 -0.622 0.239 9
-0.605 -0.658 0.627 8
-0.737 -0.763 0.917 8
-0.851 -0.927 1.075 9
-0.813 -1.094 1.051 8
-0.731 -0.985 0.946 9
-0.547 -1.085 0.709 8
-0.308 -1.171 0.431 8
-0.015 -1.279 0.268 9
0.287 -1.334 0.221 7
0.436 -1.236 0.219 10
0.398 -1.011 0.184 8
0.358 -0.91 0.165 8
0.197 -0.677 0.134 9
-0.007 -0.503 0.113 8
-0.071 -0.55 0.181 9
0.112 -0.779 0.27 8
0.403 -0.97 0.197 8
0.646 -1.085 0.073 9
0.582 -0.976 0.066 8
0.667 -0.965 -0.042 9
0.609 -0.81 -0.205 6
0.495 -0.627 -0.468 10
0.287 -0.377 -0.779 9
0.036 -0.112 -1.021 8
-0.176 0.067 -1.081 9
-0.159 0.06 -0.973 8
-0.246 0.137 -0.849 8
-0.155 0.103 -0.672 9
0.005 -0.011 -0.533 8
0.152 -0.186 -0.404 8
0.227 -0.334 -0.282 9
0.24 -0.403 -0.161 8
0.216 -0.363 -0.145 7
0.159 -0.356 0.002 10
0.006 -0.225 0.139 8
-0.189 -0.009 0.196 9
-0.322 0.154 0.193 8
-0.286 0.21 0.225 9
-0.152 0.164 0.326 8
-0.137 0.148 0.294 8
-0.001 0.05 0.399 9
0.077 -0.067 0.448 8
0.073 -0.18 0.451 9
0.007 -0.264 0.435 8
-0.13 -0.318 0.408 7
-0.291 -0.325 0.352 10
-0.262 -0.292 0.316 8
-0.354 -0.276 0.183 9
-0.347 -0.289 -0.029 8
-0.271 -0.373 -0.218 8
-0.178 -0.518 -0.346 9
-0.101 -0.605 -0.433 8
-0.043 -0.59 -0.46 8
-0.038 -0.531 -0.414 9
-0.037 -0.543 -0.426 8
-0.133 -0.567 -0.452 9
-0.204 -0.503 -0.438 6
-0.167 -0.437 -0.369 10
-0.165 -0.366 -0.298 9
-0.156 -0.265 -0.276 8
-0.141 -0.238 -0.248 9
0.003 -0.211 -0.243 8
0.211 -0.241 -0.234 8
0.371 -0.22 -0.235 9
0.442 -0.14 -0.219 8
0.443 -0.003 -0.16 9
0.42 0.147 -0.077 8
0.378 0.133 -0.07 8
0.368 0.237 0.013 7
0.354 0.291 0.112 10
0.322 0.3 0.195 9
0.271 0.294 0.257 8
0.199 0.309 0.301 8
0.101 0.348 0.322 9
0.091 0.313 0.29 8
0.0 0.346 0.329 8
-0.037 0.36 0.355 9
-0.029 0.343 0.344 8
-0.028 0.278 0.344 9
-0.041 0.201 0.389 8
-0.037 0.181 0.35 7
-0.049 0.126 0.391 10
-0.058 0.088 0.395 8
-0.049 0.064 0.374 9
-0.012 0.049 0.319 8
0.054 0.033 0.238 8
0.13 0.009 0.164 9
0.117 0.008 0.148 8
0.181 -0.021 0.128 9
0.224 -0.059 0.154 8
0.257 -0.116 0.182 8
0.289 -0.244 0.196 9
0.324 -0.399 0.192 6
0.364 -0.485 0.17 11
0.327 -0.436 0.153 8
0.335 -0.45 0.071 8
0.276 -0.35 -0.102 9
0.178 -0.17 -0.326 8
0.07 -0.01 -0.483 9
-0.018 0.093 -0.52 8
-0.065 0.146 -0.494 8
-0.058 0.131 -0.445 9
-0.078 0.153 -0.386 8
-0.097 0.162 -0.306 8
-0.105 0.154 -0.145 7
-0.088 0.116 0.059 10
-0.041 0.056 0.188 9
0.031 -0.005 0.23 8
0.028 -0.004 0.207 8
0.092 -0.029 0.188 9
0.129 -0.005 0.144 8
0.147 0.039 0.089 9
0.139 0.089 0.022 8
0.108 0.123 -0.03 8
0.077 0.125 -0.047 9
0.07 0.113 -0.042 8
0.057 0.092 -0.009 7
0.035 0.064 0.09 10
-0.004 0.033 0.199 8
-0.021 -0.034 0.158 9
0.012 -0.085 0.046 8
0.058 -0.201 -0.048 9
0.052 -0.181 -0.043 8
0.074 -0.284 -0.074 8
0.058 -0.191 -0.022 9
0.012 -0.044 0.0 8
-0.026 0.053 -0.012 8
-0.03 0.099 -0.038 9
-0.027 0.089 -0.034 7
0.0 0.094 0.038 10
0.021 0.085 0.171 8
0.003 0.107 0.242 8
-0.04 0.163 0.245 9
-0.037 0.173 0.167 8
0.05 0.072 -0.007 9
0.045 0.065 -0.006 8
0.159 -0.082 -0.235 8
0.192 -0.16 -0.409 9
0.125 -0.121 -0.482 8
0.018 -0.029 -0.502 9
-0.086 0.048 -0.487 6
-0.144 0.09 -0.449 10
-0.129 0.081 -0.404 9
-0.127 0.094 -0.359 8
-0.082 0.099 -0.288 9
-0.035 0.101 -0.143 8
-0.008 0.087 0.047 8
0.015 0.064 0.228 9
0.042 0.038 0.372 8
0.038 0.034 0.335 9
0.044 0.002 0.396 8
0.032 -0.021 0.387 8
0.017 -0.025 0.349 7
0.012 -0.014 0.319 10
0.024 -0.016 0.294 8
0.037 -0.033 0.262 9
0.034 -0.03 0.236 8
0.053 -0.045 0.181 9
0.067 -0.049 0.072 8
0.068 -0.033 -0.062 8
0.056 -0.007 -0.171 9
0.044 0.011 -0.203 8
0.042 0.01 -0.16 9
0.038 0.009 -0.144 8
0.047 -0.01 -0.068 7
0.051 -0.036 -0.017 10
0.034 -0.029 0.001 8
-0.002 0.008 0.005 9
-0.033 0.035 -0.019 8
-0.032 0.036 -0.097 8
-0.029 0.033 -0.087 9
-0.011 0.023 -0.205 8
0.01 0.018 -0.282 9
0.034 0.011 -0.265 8
0.051 -0.003 -0.192 8
0.059 -0.005 -0.125 9
0.053 -0.004 -0.113 6
0.041 0.007 -0.051 11
0.005 0.023 0.023 8
-0.037 0.052 0.094 8
-0.072 0.08 0.144 9
-0.076 0.08 0.158 8
-0.065 0.048 0.131 8
-0.058 0.043 0.118 9
-0.048 0.014 0.08 8
-0.033 -0.004 0.048 9
-0.017 -0.009 0.011 8
-0.02 0.002 -0.029 8
-0.037 0.018 -0.099 7
-0.053 0.037 -0.21 10
-0.048 0.033 -0.189 9
-0.077 0.058 -0.278 8
-0.133 0.08 -0.284 8
-0.2 0.081 -0.164 9
-0.241 0.055 -0.013 8
-0.22 0.02 0.058 9
-0.167 0.0 0.047 8
-0.15 0.0 0.042 8
-0.12 -0.008 -0.022 9
-0.107 0.0 -0.138 8
-0.092 0.016 -0.266 7
-0.055 0.019 -0.332 10
0.004 -0.009 -0.325 8
0.078 -0.053 -0.25 9
0.07 -0.048 -0.225 8
0.119 -0.093 -0.085 8
0.125 -0.1 0.067 9
0.117 -0.073 0.165 8
0.125 -0.063 0.197 9
0.148 -0.078 0.181 8
0.162 -0.101 0.16 8
0.146 -0.091 0.144 9
0.142 -0.115 0.141 7
0.128 -0.135 0.128 10
0.117 -0.137 0.076 8
0.111 -0.146 -0.025 8
0.1 -0.152 -0.147 9
0.09 -0.165 -0.178 8
0.081 -0.149 -0.16 9
0.052 -0.113 -0.088 8
0.015 -0.006 0.009 8
0.023 0.06 0.1 9
0.079 0.059 0.173 8
0.161 0.015 0.261 9
0.145 0.013 0.235 6
0.172 0.012 0.348 10
0.102 0.067 0.418 9
0.014 0.109 0.429 8
-0.03 0.117 0.399 9
-0.04 0.092 0.297 8
-0.035 0.064 0.083 8
-0.028 0.061 -0.18 9
-0.025 0.054 -0.162 8
# end
#Thu Feb 26 20:20:43 GMT+08:00 2015 
