# Supplementary material for: Abnormal Gait Behavior Detection for Elderly Based on Enhanced Wigner-Ville Analysis and Cloud Incremental SVM Learning
Source: Hindawi journal article supplement (doi:10.1155/2016/5869238), 2016-01-01
Supplement: f1 [file 5869238.f1.zip › Supplementary Materials/Original Data/Squatting/original__23.txt]

# Accelerometer Values
# filename:  original__23.txt
# Saving start time: Thu Feb 26 20:20:47 GMT+08:00 2015

# sensor resolution: 0.0095825195m/s^2
#Sensorvendor: KIONIX, name: KX023 Accelerometer, type: 1,version : 1, range 39.240005

# X value, Y value, Z value, time diff in ms
-0.117 0.1 -0.125 8
-0.096 0.086 0.018 9
-0.06 0.048 0.15 7
-0.034 0.03 0.222 10
-0.015 0.023 0.214 8
0.004 0.007 0.159 8
0.003 0.006 0.143 9
0.03 -0.006 0.075 8
0.055 -0.012 0.022 9
0.066 -0.024 0.007 8
0.053 -0.028 0.027 8
0.019 -0.005 0.033 9
-0.013 0.026 0.009 8
-0.012 0.023 0.008 9
-0.031 0.043 -0.029 6
-0.033 0.041 -0.066 10
-0.029 0.04 -0.085 9
-0.023 0.044 -0.079 8
-0.014 0.038 -0.062 9
0.003 0.037 -0.054 8
0.002 0.033 -0.048 8
0.025 0.017 -0.055 9
0.042 -0.016 -0.096 8
0.044 -0.045 -0.147 9
0.025 -0.056 -0.157 8
0.007 -0.065 -0.111 8
0.006 -0.058 -0.1 7
-0.009 -0.069 -0.04 10
-0.012 -0.086 0.003 8
0.002 -0.114 0.025 9
0.012 -0.107 0.033 8
0.014 -0.068 0.062 9
0.018 -0.039 0.098 8
0.016 -0.035 0.103 8
0.022 -0.031 0.093 9
0.028 0.003 0.084 8
0.014 0.045 0.062 9
-0.007 0.069 0.017 8
-0.013 0.066 -0.014 7
-0.007 0.065 -0.022 10
-0.006 0.059 -0.02 8
-0.011 0.063 -0.013 9
-0.025 0.067 0.007 8
-0.027 0.071 0.021 8
-0.024 0.067 0.0 9
-0.01 0.041 -0.027 8
0.002 0.023 -0.041 9
0.001 0.021 -0.037 8
0.003 0.016 -0.031 8
-0.007 0.018 -0.019 9
-0.026 0.033 -0.022 6
-0.035 0.049 -0.043 10
-0.03 0.053 -0.084 9
-0.012 0.027 -0.139 8
-0.011 0.024 -0.125 9
0.018 -0.007 -0.174 8
0.045 -0.012 -0.197 8
0.059 -0.007 -0.169 9
0.058 0.002 -0.106 8
0.041 0.028 -0.05 9
0.022 0.032 -0.014 8
0.02 0.029 -0.012 8
-0.004 0.008 -0.007 7
-0.028 -0.018 -0.022 10
-0.036 -0.033 -0.043 9
-0.015 -0.053 -0.063 8
0.017 -0.064 -0.073 8
0.03 -0.064 -0.077 9
0.027 -0.058 -0.07 8
0.028 -0.067 -0.056 9
0.017 -0.059 -0.029 8
-0.008 -0.027 -0.024 8
-0.022 -0.013 -0.032 9
-0.015 -0.031 -0.057 8
-0.014 -0.028 -0.051 7
0.005 -0.058 -0.108 10
0.033 -0.075 -0.141 8
0.056 -0.076 -0.123 9
0.056 -0.064 -0.115 8
0.033 -0.044 -0.125 8
0.001 -0.019 -0.11 9
-0.034 0.013 -0.062 8
-0.031 0.012 -0.055 9
-0.048 0.024 -0.01 8
-0.032 -0.011 0.02 8
0.002 -0.06 0.034 9
0.042 -0.096 0.025 7
0.067 -0.109 0.01 10
0.066 -0.107 -0.036 8
0.06 -0.097 -0.033 8
0.035 -0.087 -0.092 9
-0.003 -0.074 -0.119 8
-0.044 -0.065 -0.125 9
-0.076 -0.073 -0.108 8
-0.069 -0.104 -0.058 8
-0.038 -0.141 -0.012 9
-0.034 -0.127 -0.011 8
0.0 -0.165 -0.025 9
0.043 -0.189 -0.1 6
0.078 -0.194 -0.175 10
0.081 -0.192 -0.202 9
0.045 -0.196 -0.201 8
0.04 -0.177 -0.181 9
-0.005 -0.182 -0.17 8
-0.036 -0.178 -0.125 8
-0.061 -0.196 -0.054 9
-0.075 -0.226 -0.012 8
-0.071 -0.244 -0.028 8
-0.068 -0.319 -0.08 9
-0.061 -0.287 -0.072 8
-0.035 -0.399 -0.112 7
0.0 -0.471 -0.123 10
-0.01 -0.536 -0.117 8
-0.039 -0.612 -0.105 9
-0.065 -0.669 -0.094 8
-0.089 -0.713 -0.084 9
-0.08 -0.642 -0.075 8
-0.09 -0.703 -0.067 8
-0.076 -0.774 -0.047 9
-0.05 -0.86 -0.033 8
0.023 -0.984 -0.054 9
0.083 -1.118 -0.155 8
0.075 -1.006 -0.14 7
0.076 -1.107 -0.376 10
0.051 -1.145 -0.657 8
0.049 -1.242 -0.815 9
0.072 -1.365 -0.852 8
0.073 -1.443 -0.827 8
0.074 -1.51 -0.689 9
0.051 -1.489 -0.407 8
0.046 -1.34 -0.367 8
0.008 -1.273 -0.058 9
-0.023 -1.189 0.143 8
-0.057 -1.089 0.193 9
-0.092 -0.959 0.118 6
-0.038 -0.837 -0.031 10
0.036 -0.749 -0.249 9
0.032 -0.674 -0.224 8
0.067 -0.622 -0.415 9
0.138 -0.593 -0.531 8
0.173 -0.556 -0.598 8
0.138 -0.513 -0.565 9
0.033 -0.465 -0.457 8
-0.125 -0.394 -0.251 9
-0.113 -0.354 -0.226 8
-0.28 -0.241 0.092 8
-0.389 -0.146 0.392 7
-0.421 -0.114 0.558 10
-0.383 -0.065 0.601 9
-0.279 0.053 0.583 8
-0.137 0.178 0.539 8
-0.123 0.16 0.485 9
0.006 0.267 0.423 8
0.09 0.396 0.299 9
0.123 0.526 0.143 8
0.176 0.616 -0.028 8
0.186 0.769 -0.203 9
0.142 0.971 -0.216 8
0.128 0.874 -0.194 7
0.131 1.049 -0.008 10
0.161 1.188 0.212 8
0.222 1.293 0.411 9
0.301 1.407 0.594 8
0.365 1.542 0.669 8
0.329 1.388 0.602 9
0.379 1.511 0.593 8
0.396 1.571 0.62 9
0.316 1.682 0.778 8
0.134 1.868 1.042 8
-0.061 2.138 1.503 9
-0.055 1.924 1.353 7
-0.192 2.206 1.942 10
-0.216 2.314 2.259 8
-0.089 2.289 2.179 8
0.142 2.209 1.797 9
0.393 2.145 1.34 8
0.555 2.136 1.001 9
0.611 2.167 0.799 8
0.55 1.95 0.719 8
0.512 1.997 0.647 9
0.295 2.064 0.72 8
-0.01 2.158 0.847 8
-0.209 2.192 0.888 7
-0.26 2.12 0.828 10
-0.222 2.009 0.638 9
-0.2 1.808 0.574 8
-0.117 1.718 0.328 8
-0.017 1.618 0.174 9
0.067 1.551 0.219 8
0.063 1.527 0.464 9
-0.038 1.593 0.716 8
-0.185 1.784 0.798 8
-0.166 1.606 0.719 9
-0.27 1.771 0.615 8
-0.323 1.837 0.39 7
-0.433 1.941 0.151 10
-0.575 2.03 -0.069 8
-0.637 1.966 -0.231 9
-0.542 1.657 -0.318 8
-0.488 1.492 -0.286 9
-0.378 1.112 -0.389 8
-0.264 0.741 -0.591 8
-0.155 0.361 -0.972 9
-0.196 0.041 -1.437 8
-0.303 -0.255 -1.606 8
-0.35 -0.563 -1.301 9
-0.315 -0.507 -1.171 7
-0.346 -0.88 -0.592 10
-0.45 -1.279 -0.041 8
-0.577 -1.714 0.289 8
-0.639 -2.174 0.552 9
-0.61 -2.522 0.886 8
-0.412 -2.702 1.121 9
-0.371 -2.432 1.009 8
-0.156 -2.446 1.048 8
0.196 -2.486 0.975 9
0.804 -2.689 0.786 8
1.39 -2.944 0.498 9
1.251 -2.65 0.448 6
1.616 -3.124 0.022 10
1.454 -2.812 0.02 9
0.945 -2.66 -0.099 8
0.311 -2.458 -0.184 9
-0.219 -2.307 -0.269 8
-0.602 -2.113 -0.49 8
-0.822 -1.825 -0.786 9
-0.74 -1.643 -0.708 8
-0.658 -1.426 -0.87 9
-0.347 -1.302 -0.98 8
-0.039 -1.155 -1.247 8
0.264 -1.031 -1.504 7
0.561 -1.058 -1.505 10
0.747 -1.132 -1.255 9
0.673 -1.019 -1.13 8
0.742 -1.015 -0.688 8
0.73 -0.884 -0.165 9
0.667 -0.67 0.281 8
0.518 -0.424 0.553 8
0.282 -0.085 0.651 9
0.052 0.32 0.606 8
0.047 0.288 0.545 9
-0.216 0.747 0.39 8
-0.421 1.149 0.322 7
-0.439 1.312 0.405 10
-0.379 1.309 0.423 8
-0.295 1.227 0.374 9
-0.223 1.122 0.36 8
-0.201 1.01 0.324 8
-0.169 0.918 0.347 9
-0.172 0.837 0.394 8
-0.179 0.77 0.54 9
-0.191 0.704 0.743 8
-0.22 0.638 0.859 8
-0.242 0.57 0.838 9
-0.218 0.513 0.754 6
-0.223 0.458 0.619 11
-0.223 0.409 0.386 8
-0.222 0.333 0.146 8
-0.211 0.171 -0.006 9
-0.18 -0.083 -0.102 8
-0.139 -0.32 -0.205 8
-0.125 -0.288 -0.184 9
-0.128 -0.406 -0.318 8
-0.168 -0.419 -0.399 9
-0.186 -0.438 -0.408 8
-0.147 -0.556 -0.417 8
-0.058 -0.744 -0.395 7
0.027 -0.864 -0.354 10
0.024 -0.777 -0.319 9
0.066 -0.77 -0.319 8
0.078 -0.694 -0.396 8
0.09 -0.613 -0.509 9
0.141 -0.549 -0.571 8
0.232 -0.519 -0.63 9
0.365 -0.486 -0.709 8
0.328 -0.437 -0.638 8
0.466 -0.378 -0.76 9
0.49 -0.259 -0.896 8
0.377 -0.057 -0.901 7
0.178 0.128 -0.749 10
0.002 0.237 -0.544 8
-0.066 0.28 -0.355 9
-0.06 0.252 -0.319 8
-0.032 0.255 -0.158 8
0.008 0.247 -0.043 9
0.012 0.264 0.012 8
0.022 0.328 0.023 9
0.032 0.391 0.02 8
0.005 0.405 0.025 8
0.004 0.364 0.022 9
-0.023 0.354 0.033 7
-0.038 0.355 0.048 10
-0.045 0.335 0.062 8
-0.046 0.266 0.064 8
-0.05 0.187 0.04 9
-0.045 0.115 0.015 8
-0.04 0.104 0.014 9
-0.002 0.023 0.013 8
0.009 -0.049 0.042 8
-0.013 -0.095 0.083 9
-0.044 -0.117 0.091 8
-0.055 -0.125 0.046 9
-0.049 -0.113 0.042 6
-0.046 -0.112 -0.039 10
-0.037 -0.104 -0.119 9
0.0 -0.088 -0.157 8
0.053 -0.073 -0.144 9
0.097 -0.069 -0.106 8
0.127 -0.062 -0.066 8
0.114 -0.056 -0.06 9
0.122 -0.044 -0.02 8
0.122 -0.042 0.013 9
0.135 -0.051 0.024 8
0.146 -0.051 0.018 8
0.126 -0.041 0.004 7
0.067 -0.02 -0.032 10
0.06 -0.018 -0.029 8
-0.027 0.013 -0.072 9
-0.095 0.056 -0.09 8
-0.089 0.077 -0.078 9
-0.008 0.069 -0.091 8
0.065 0.061 -0.109 8
0.076 0.051 -0.063 9
0.068 0.046 -0.057 8
0.05 0.026 0.02 9
0.036 0.003 0.076 8
0.018 -0.011 0.1 7
0.003 -0.02 0.085 10
0.027 -0.026 0.023 8
0.059 -0.021 -0.087 9
0.053 -0.019 -0.078 8
0.052 0.003 -0.145 8
0.007 0.044 -0.084 9
-0.064 0.1 0.011 8
-0.122 0.153 0.079 9
-0.154 0.189 0.121 8
-0.163 0.203 0.132 8
-0.146 0.183 0.118 9
-0.153 0.175 0.111 6
-0.156 0.155 0.117 10
-0.14 0.117 0.153 9
-0.117 0.054 0.226 8
-0.102 -0.005 0.272 9
-0.091 -0.047 0.262 8
-0.082 -0.042 0.236 8
-0.069 -0.074 0.178 9
-0.05 -0.1 0.073 8
-0.039 -0.103 -0.018 9
-0.046 -0.083 -0.125 8
-0.043 -0.051 -0.217 8
-0.038 -0.046 -0.195 7
-0.013 -0.043 -0.263 10
0.022 -0.065 -0.31 9
0.057 -0.064 -0.334 8
0.088 -0.058 -0.337 8
0.102 -0.06 -0.248 9
0.081 -0.05 -0.096 8
0.031 -0.025 0.042 9
0.028 -0.023 0.038 8
-0.013 -0.018 0.18 8
-0.032 -0.025 0.351 9
-0.037 0.005 0.435 8
-0.023 0.072 0.369 7
0.032 0.118 0.217 10
0.126 0.079 0.085 8
0.113 0.071 0.077 9
0.186 -0.012 0.001 8
0.181 -0.065 -0.053 8
0.094 -0.082 -0.103 9
-0.017 -0.075 -0.165 8
-0.103 -0.054 -0.255 9
-0.156 -0.025 -0.333 8
-0.141 -0.022 -0.299 8
-0.148 -0.004 -0.326 9
-0.137 0.015 -0.316 7
-0.113 0.036 -0.25 10
-0.074 0.041 -0.132 8
-0.045 0.034 -0.009 8
-0.036 0.042 0.084 9
-0.032 0.038 0.076 8
-0.017 0.054 0.123 9
0.022 0.059 0.142 8
0.077 0.033 0.153 8
0.12 -0.006 0.165 9
0.134 -0.035 0.162 8
0.139 -0.048 0.137 9
0.125 -0.043 0.123 6
0.118 -0.041 0.092 10
0.081 -0.033 0.062 9
0.034 -0.032 0.033 8
0.006 -0.034 0.0 8
-0.01 -0.031 -0.026 9
-0.033 -0.024 -0.042 8
-0.029 -0.022 -0.038 9
-0.056 -0.007 -0.05 8
-0.073 0.021 -0.071 8
-0.089 0.075 -0.083 9
-0.11 0.128 -0.051 8
-0.099 0.115 -0.046 7
-0.13 0.101 0.061 10
-0.117 0.091 0.055 8
-0.088 0.018 0.07 9
-0.026 -0.046 0.054 8
0.051 -0.088 0.018 9
0.102 -0.103 -0.023 8
0.103 -0.093 -0.041 8
0.093 -0.051 -0.033 9
0.046 -0.046 -0.03 8
-0.021 0.044 -0.017 9
-0.078 0.146 0.004 8
-0.122 0.208 0.02 7
-0.138 0.201 0.031 10
-0.123 0.134 0.029 8
-0.111 0.12 0.026 9
-0.063 0.024 -0.038 8
0.023 -0.061 -0.172 8
0.108 -0.108 -0.291 9
0.148 -0.128 -0.271 8
0.132 -0.134 -0.123 8
0.064 -0.128 0.029 9
0.057 -0.115 0.026 8
-0.03 -0.075 0.11 9
-0.11 0.03 0.122 6
-0.166 0.135 0.097 10
-0.192 0.183 0.06 9
-0.184 0.16 0.041 8
-0.127 0.06 0.033 9
-0.114 0.054 0.03 8
0.003 -0.072 -0.003 8
0.159 -0.196 -0.059 9
0.277 -0.305 -0.125 8
0.287 -0.323 -0.148 9
0.18 -0.236 -0.075 8
0.032 -0.098 0.03 8
0.029 -0.088 0.027 7
-0.129 0.106 0.092 10
-0.273 0.301 0.129 9
-0.375 0.39 0.123 8
-0.388 0.376 0.079 8
-0.278 0.236 0.041 9
-0.122 0.035 0.028 8
-0.11 0.032 0.025 9
0.034 -0.094 0.022 8
0.151 -0.149 -0.013 8
0.223 -0.154 -0.101 9
0.231 -0.131 -0.217 8
0.166 -0.091 -0.317 7
0.044 -0.01 -0.316 10
0.039 -0.009 -0.285 8
-0.11 0.113 -0.138 9
-0.225 0.205 0.042 8
-0.236 0.197 0.139 8
-0.153 0.109 0.156 9
-0.041 0.005 0.141 8
0.046 -0.057 0.116 9
0.042 -0.051 0.104 8
0.084 -0.059 0.068 8
0.088 -0.043 0.021 9
0.077 -0.027 -0.017 6
0.057 -0.011 -0.035 11
0.036 0.002 -0.013 8
0.013 0.011 0.047 8
0.011 0.01 0.042 9
-0.032 0.018 0.123 8
-0.084 0.051 0.172 9
-0.127 0.135 0.177 8
-0.16 0.213 0.144 8
-0.153 0.227 0.094 9
-0.111 0.21 0.057 8
-0.1 0.189 0.052 8
-0.052 0.173 0.04 7
-0.007 0.147 0.079 10
0.05 0.104 0.171 9
0.143 0.053 0.247 8
0.252 0.037 0.162 8
0.348 0.018 0.038 9
0.313 0.016 0.034 8
0.33 0.034 0.102 9
0.23 0.164 0.31 8
0.162 0.322 0.538 8
0.177 0.434 0.679 9
0.214 0.49 0.7 8
0.193 0.441 0.63 7
0.241 0.512 0.568 10
0.282 0.65 0.41 8
0.282 0.873 0.192 9
0.234 1.145 0.035 8
0.172 1.441 0.011 9
0.101 1.686 0.113 8
# end
#Thu Feb 26 20:20:51 GMT+08:00 20154
