# Supplementary material for: Abnormal Gait Behavior Detection for Elderly Based on Enhanced Wigner-Ville Analysis and Cloud Incremental SVM Learning
Source: Hindawi journal article supplement (doi:10.1155/2016/5869238), 2016-01-01
Supplement: f1 [file 5869238.f1.zip › Supplementary Materials/Original Data/Squatting/original__24.txt]

# Accelerometer Values
# filename:  original__24.txt
# Saving start time: Thu Feb 26 20:20:55 GMT+08:00 2015

# sensor resolution: 0.0095825195m/s^2
#Sensorvendor: KIONIX, name: KX023 Accelerometer, type: 1,version : 1, range 39.240005

# X value, Y value, Z value, time diff in ms
-0.179 0.004 -0.235 8
-0.1 -0.025 -0.137 7
0.012 -0.077 -0.019 10
0.114 -0.124 0.088 9
0.189 -0.145 0.162 8
0.204 -0.14 0.203 8
0.184 -0.126 0.182 9
0.149 -0.114 0.192 8
0.096 -0.087 0.186 8
0.029 -0.035 0.174 9
-0.035 0.027 0.129 8
-0.086 0.08 0.042 9
-0.116 0.12 -0.053 8
-0.105 0.108 -0.048 7
-0.099 0.124 -0.084 10
-0.054 0.103 -0.05 8
0.016 0.063 -0.025 9
0.076 0.017 -0.003 8
0.09 -0.008 0.038 8
0.065 -0.007 0.087 9
0.058 -0.006 0.079 8
0.02 -0.019 0.114 9
-0.024 -0.02 0.088 8
-0.054 0.006 -0.037 8
-0.05 0.021 -0.182 9
-0.045 0.019 -0.164 6
0.031 -0.035 -0.272 11
0.028 -0.031 -0.245 8
0.051 -0.055 -0.215 8
0.06 -0.078 -0.123 9
0.045 -0.114 -0.028 8
0.022 -0.147 0.015 8
0.0 -0.148 0.0 9
-0.038 -0.091 -0.019 8
-0.034 -0.082 -0.017 9
-0.091 -0.001 0.032 8
-0.121 0.054 0.083 8
-0.088 0.064 0.055 7
-0.024 0.031 0.012 10
0.023 -0.017 0.018 9
0.046 -0.054 0.072 8
0.041 -0.049 0.065 8
0.046 -0.075 0.133 9
0.022 -0.054 0.164 8
-0.031 0.02 0.137 9
-0.086 0.087 0.062 8
-0.124 0.137 -0.054 8
-0.112 0.166 -0.158 9
-0.1 0.149 -0.143 8
-0.101 0.153 -0.195 7
-0.056 0.137 -0.187 10
0.0 0.094 -0.096 8
0.038 0.044 0.064 9
0.043 0.014 0.22 8
0.038 0.013 0.198 9
0.029 0.006 0.271 8
0.008 0.025 0.25 8
-0.021 0.043 0.184 9
-0.057 0.047 0.108 8
-0.075 0.059 0.039 8
-0.055 0.058 0.004 9
-0.05 0.052 0.003 7
-0.008 0.021 -0.011 10
0.045 -0.036 -0.022 8
0.078 -0.092 -0.023 8
0.069 -0.095 -0.014 9
0.033 -0.054 -0.011 8
-0.007 -0.013 -0.062 9
-0.006 -0.011 -0.056 8
-0.025 0.014 -0.108 8
-0.028 0.018 -0.101 9
-0.015 0.015 -0.048 8
0.023 -0.003 0.028 9
0.063 -0.048 0.098 6
0.072 -0.072 0.135 10
0.065 -0.065 0.122 9
0.051 -0.071 0.102 8
0.03 -0.063 0.014 9
0.014 -0.056 -0.103 8
0.002 -0.061 -0.198 8
-0.016 -0.058 -0.247 9
-0.027 -0.05 -0.251 8
-0.024 -0.045 -0.226 9
-0.003 -0.078 -0.167 8
0.039 -0.164 -0.065 8
0.074 -0.235 -0.001 7
0.077 -0.249 -0.03 10
0.047 -0.228 -0.122 8
0.016 -0.206 -0.183 9
0.014 -0.186 -0.165 8
-0.007 -0.184 -0.186 9
-0.031 -0.203 -0.184 8
-0.046 -0.217 -0.174 8
-0.047 -0.215 -0.151 9
-0.034 -0.214 -0.123 8
-0.01 -0.235 -0.1 9
-0.009 -0.211 -0.09 8
0.028 -0.277 -0.081 7
0.056 -0.357 -0.08 10
0.051 -0.424 -0.083 8
0.027 -0.477 -0.081 9
-0.023 -0.514 -0.078 8
-0.083 -0.54 -0.077 8
-0.074 -0.486 -0.069 9
-0.116 -0.51 -0.074 8
-0.128 -0.543 -0.082 9
-0.095 -0.575 -0.091 8
-0.032 -0.593 -0.109 8
0.02 -0.6 -0.109 9
0.018 -0.54 -0.098 6
0.05 -0.533 -0.07 11
0.052 -0.515 -0.049 8
0.026 -0.506 -0.058 8
-0.03 -0.523 -0.062 9
-0.124 -0.571 -0.033 8
-0.198 -0.663 -0.005 8
-0.206 -0.816 0.017 9
-0.185 -0.735 0.015 8
-0.164 -0.926 0.046 9
-0.128 -1.052 0.071 8
-0.051 -1.137 0.06 8
0.042 -1.228 0.027 7
0.109 -1.283 -0.037 10
0.147 -1.277 -0.159 9
0.132 -1.149 -0.143 8
0.13 -1.101 -0.287 8
0.148 -1.082 -0.361 9
0.173 -1.028 -0.504 8
0.143 -0.961 -0.716 9
0.134 -0.992 -0.841 8
0.143 -1.02 -0.915 8
0.128 -0.918 -0.823 9
0.103 -0.897 -0.796 8
0.033 -0.842 -0.607 7
-0.077 -0.767 -0.275 10
-0.197 -0.674 0.062 8
-0.258 -0.545 0.225 9
-0.229 -0.402 0.171 8
-0.206 -0.362 0.154 8
-0.123 -0.263 -0.066 9
-0.038 -0.212 -0.285 8
0.005 -0.162 -0.419 9
0.015 -0.105 -0.462 8
0.0 -0.062 -0.4 8
-0.068 -0.006 -0.192 9
-0.061 -0.005 -0.172 7
-0.174 0.079 0.172 10
-0.28 0.225 0.475 8
-0.341 0.391 0.703 8
-0.327 0.499 0.881 9
-0.214 0.608 0.903 8
-0.048 0.799 0.73 9
-0.043 0.719 0.657 8
0.095 0.927 0.392 8
0.18 1.068 0.121 9
0.222 1.152 -0.066 8
0.212 1.194 -0.111 9
0.191 1.074 -0.1 6
0.078 1.394 0.066 10
0.07 1.255 0.059 9
0.021 1.458 0.168 8
-0.023 1.703 0.241 8
-0.039 1.947 0.382 9
0.019 2.083 0.679 8
0.079 2.169 1.009 9
0.071 1.952 1.206 8
0.101 1.756 1.085 8
0.11 2.24 1.061 9
0.126 2.299 0.779 8
0.148 2.4 0.415 7
0.158 2.521 0.271 10
0.104 2.572 0.52 8
0.094 2.314 0.468 9
-0.018 2.412 0.938 8
-0.113 2.523 1.315 9
-0.105 2.52 1.446 8
0.002 2.463 1.348 8
0.156 2.392 1.17 9
0.327 2.265 1.025 8
0.294 2.039 0.923 9
0.387 1.88 0.848 8
0.307 1.696 0.953 7
0.132 1.537 1.233 10
-0.063 1.426 1.41 8
-0.244 1.371 1.359 9
-0.315 1.39 1.034 8
-0.284 1.251 0.931 8
-0.239 1.39 0.44 9
-0.147 1.552 -0.085 8
-0.055 1.651 -0.532 9
-0.031 1.703 -0.681 8
-0.16 1.693 -0.419 8
-0.431 1.616 0.156 9
-0.388 1.454 0.141 6
-0.629 1.311 0.784 10
-0.719 1.08 1.218 9
-0.662 0.817 1.181 8
-0.427 0.562 0.615 9
-0.095 0.305 -0.23 8
0.164 -0.001 -1.022 8
0.148 -0.001 -0.92 9
0.259 -0.294 -1.415 8
0.222 -0.535 -1.414 9
0.126 -0.884 -1.033 8
0.108 -1.289 -0.542 8
0.212 -1.735 -0.104 7
0.395 -2.283 0.21 10
0.355 -2.055 0.189 9
0.504 -2.534 0.466 8
0.463 -2.823 0.709 8
0.196 -2.898 0.741 9
-0.174 -2.856 0.532 8
-0.358 -2.807 0.23 9
-0.28 -2.727 -0.11 8
-0.252 -2.454 -0.099 8
-0.087 -2.43 -0.514 9
0.073 -2.445 -1.039 8
0.259 -2.473 -1.556 7
0.314 -2.407 -1.944 10
0.301 -2.312 -1.968 8
0.49 -2.327 -1.606 9
0.441 -2.094 -1.445 8
0.501 -2.099 -1.124 8
0.319 -1.958 -0.896 9
0.17 -1.801 -0.542 8
0.093 -1.618 -0.164 9
0.055 -1.294 -0.039 8
0.078 -0.906 -0.203 8
0.07 -0.816 -0.183 9
0.182 -0.443 -0.439 7
0.371 -0.156 -0.589 10
0.558 0.021 -0.61 8
0.649 0.151 -0.541 8
0.623 0.267 -0.427 9
0.501 0.397 -0.329 8
0.451 0.357 -0.296 9
0.279 0.549 -0.233 8
0.13 0.713 -0.17 8
0.043 0.77 -0.089 9
-0.004 0.766 -0.018 8
-0.012 0.764 -0.056 8
-0.011 0.687 -0.05 7
0.012 0.697 -0.13 10
0.033 0.693 -0.068 9
0.049 0.674 0.164 8
0.068 0.628 0.459 8
0.096 0.523 0.76 9
0.16 0.382 1.039 8
0.206 0.292 1.213 9
0.185 0.262 1.091 8
0.093 0.281 1.129 8
-0.129 0.345 1.064 9
-0.361 0.366 0.952 8
-0.499 0.349 0.805 7
-0.505 0.274 0.675 10
-0.407 0.111 0.593 8
-0.367 0.1 0.533 9
-0.207 -0.119 0.47 8
-0.033 -0.324 0.383 9
0.093 -0.462 0.274 8
0.154 -0.542 0.144 8
0.135 -0.603 -0.007 9
0.085 -0.648 -0.152 8
0.076 -0.583 -0.137 8
0.029 -0.623 -0.252 9
-0.015 -0.632 -0.362 7
-0.027 -0.574 -0.438 10
0.001 -0.479 -0.441 8
0.032 -0.366 -0.406 8
0.028 -0.238 -0.381 9
0.025 -0.214 -0.343 8
-0.019 -0.108 -0.353 9
-0.067 -0.036 -0.406 8
-0.068 0.0 -0.476 8
-0.017 -0.008 -0.499 9
0.049 -0.066 -0.426 8
0.044 -0.059 -0.383 9
0.106 -0.172 -0.235 6
0.14 -0.25 -0.099 10
0.122 -0.202 -0.082 9
0.047 -0.071 -0.164 8
-0.065 0.067 -0.251 9
-0.162 0.201 -0.283 8
-0.146 0.181 -0.255 8
-0.191 0.288 -0.191 9
-0.204 0.339 -0.044 8
-0.226 0.358 0.139 9
-0.267 0.363 0.291 8
-0.3 0.366 0.386 8
-0.27 0.33 0.347 7
-0.288 0.322 0.436 10
-0.293 0.285 0.541 9
-0.29 0.258 0.634 8
-0.258 0.221 0.66 8
-0.195 0.171 0.595 9
-0.136 0.138 0.446 8
-0.087 0.076 0.3 8
-0.078 0.068 0.27 9
-0.051 -0.008 0.231 8
-0.063 -0.038 0.232 9
-0.089 -0.019 0.193 8
-0.09 -0.019 0.12 7
-0.055 -0.093 0.034 10
0.0 -0.184 -0.054 8
0.0 -0.165 -0.048 9
0.036 -0.214 -0.169 8
0.031 -0.22 -0.354 8
0.002 -0.202 -0.528 9
-0.023 -0.175 -0.616 8
-0.025 -0.161 -0.642 9
-0.014 -0.157 -0.605 8
-0.012 -0.141 -0.545 8
-0.004 -0.12 -0.445 9
0.002 -0.093 -0.255 6
0.004 -0.077 -0.028 11
0.002 -0.059 0.13 8
-0.006 -0.042 0.211 8
-0.002 -0.041 0.235 9
-0.002 -0.037 0.211 8
0.008 -0.039 0.2 9
-0.001 -0.018 0.145 8
-0.033 0.042 0.082 8
-0.071 0.12 0.072 9
-0.095 0.161 0.102 8
-0.082 0.151 0.143 8
-0.073 0.136 0.128 7
-0.03 0.107 0.178 10
0.0 0.118 0.232 9
0.019 0.115 0.312 8
0.054 0.042 0.404 8
0.083 -0.018 0.458 9
0.075 -0.018 0.46 8
0.067 -0.016 0.414 9
0.033 0.033 0.381 8
0.011 0.069 0.325 8
0.006 0.058 0.265 9
0.012 0.03 0.194 8
0.011 0.027 0.175 7
0.01 0.016 -0.029 10
0.009 0.014 -0.026 8
0.002 0.012 -0.11 9
0.016 -0.023 -0.151 8
0.023 -0.065 -0.164 8
-0.005 -0.096 -0.155 9
-0.042 -0.118 -0.131 8
-0.038 -0.106 -0.099 9
-0.061 -0.13 -0.089 8
-0.073 -0.147 -0.064 8
-0.065 -0.146 -0.061 9
-0.034 -0.136 -0.082 7
0.001 -0.119 -0.131 10
0.023 -0.099 -0.199 8
0.02 -0.089 -0.179 8
0.028 -0.075 -0.238 9
0.024 -0.055 -0.243 8
0.015 -0.04 -0.153 9
-0.009 -0.04 -0.006 8
-0.041 -0.034 -0.012 8
-0.025 -0.036 0.002 9
-0.022 -0.033 0.001 8
0.013 -0.089 0.089 9
0.002 -0.12 0.116 6
-0.087 -0.064 0.131 10
-0.175 0.002 0.086 9
-0.166 0.065 0.048 8
-0.082 0.089 0.05 9
-0.074 0.08 0.045 8
0.014 0.067 0.085 8
0.063 0.062 0.15 9
0.068 0.085 0.221 8
0.051 0.102 0.25 8
0.041 0.06 0.217 9
0.049 -0.008 0.118 8
0.044 -0.007 0.106 7
0.044 -0.048 -0.018 10
0.024 -0.058 -0.1 8
-0.023 -0.048 -0.14 9
-0.107 -0.027 -0.154 8
-0.177 -0.001 -0.163 9
-0.192 0.04 -0.174 8
-0.173 0.036 -0.156 8
-0.14 0.071 -0.144 9
-0.083 0.05 -0.102 8
-0.018 0.0 -0.059 9
0.04 -0.036 -0.036 8
0.075 -0.047 -0.035 7
0.088 -0.041 -0.035 10
0.079 -0.037 -0.031 8
0.08 -0.028 -0.029 9
0.084 -0.026 -0.023 8
0.072 -0.026 0.0 8
0.023 0.0 0.03 9
-0.049 0.074 0.049 8
-0.131 0.163 0.07 9
-0.118 0.147 0.063 8
-0.163 0.209 0.074 8
-0.141 0.208 0.078 9
-0.088 0.14 0.1 6
-0.031 0.044 0.14 10
0.012 -0.035 0.204 9
0.027 -0.084 0.278 8
0.024 -0.076 0.25 9
0.015 -0.104 0.26 8
-0.003 -0.105 0.153 8
-0.021 -0.08 0.007 9
-0.038 -0.041 -0.097 8
-0.034 0.0 -0.154 9
-0.001 0.019 -0.181 8
-0.001 0.017 -0.163 8
0.042 -0.006 -0.147 7
0.091 -0.067 -0.084 10
0.127 -0.133 0.025 9
0.131 -0.17 0.171 8
0.099 -0.156 0.292 8
0.045 -0.11 0.334 9
0.04 -0.099 0.3 8
-0.006 -0.05 0.232 9
-0.017 -0.003 0.077 8
0.018 0.033 -0.07 8
0.074 0.037 -0.165 9
0.121 0.023 -0.221 8
0.109 0.02 -0.199 7
0.126 0.011 -0.218 10
0.101 0.001 -0.187 8
0.059 -0.012 -0.095 9
0.019 -0.027 -0.019 8
-0.006 -0.031 -0.014 8
-0.006 -0.04 -0.059 9
-0.005 -0.036 -0.053 8
0.009 -0.044 -0.141 9
0.001 -0.021 -0.195 8
-0.039 0.025 -0.163 8
-0.094 0.054 -0.097 9
-0.134 0.067 -0.017 7
-0.198 0.095 0.075 10
-0.179 0.085 0.067 8
-0.267 0.125 0.13 8
-0.319 0.181 0.126 9
-0.341 0.247 0.082 8
-0.341 0.282 0.03 9
-0.314 0.265 -0.033 8
-0.231 0.184 -0.078 8
-0.207 0.165 -0.07 9
-0.07 0.043 -0.091 8
0.063 -0.048 -0.097 9
0.147 -0.092 -0.083 6
0.151 -0.095 -0.027 10
0.07 -0.074 0.116 9
-0.048 -0.053 0.278 8
-0.043 -0.048 0.25 9
-0.13 -0.031 0.304 8
-0.129 -0.014 0.232 8
-0.039 -0.027 0.074 9
0.089 -0.069 -0.103 8
0.184 -0.097 -0.253 8
0.208 -0.095 -0.317 9
0.187 -0.086 -0.285 8
0.149 -0.062 -0.245 7
0.089 -0.037 -0.164 10
0.024 -0.017 -0.085 8
-0.039 0.006 -0.012 9
-0.076 0.038 0.041 8
-0.069 0.062 0.064 9
-0.062 0.056 0.057 8
-0.044 0.072 0.058 8
-0.047 0.076 0.054 9
-0.053 0.07 0.046 8
-0.047 0.054 0.032 9
-0.037 0.03 0.01 8
-0.033 0.027 0.009 7
-0.021 0.017 -0.018 10
-0.009 0.011 -0.042 8
0.005 0.005 -0.059 9
0.033 0.017 -0.067 8
0.059 0.032 -0.06 8
0.063 0.039 -0.041 9
0.064 0.012 0.011 8
0.058 0.011 0.01 8
0.057 -0.026 0.065 9
0.045 -0.028 0.06 8
0.048 -0.027 0.027 9
0.074 -0.055 0.016 6
0.081 -0.095 0.011 10
0.034 -0.092 -0.056 9
0.03 -0.083 -0.05 8
0.009 -0.076 -0.138 9
0.015 -0.094 -0.141 8
-0.02 -0.091 -0.117 8
-0.036 -0.061 -0.107 9
-0.025 -0.018 -0.081 8
-0.01 0.02 -0.046 9
-0.009 0.018 -0.041 8
0.017 0.052 0.009 8
0.044 0.064 0.106 7
0.062 0.058 0.213 10
0.063 0.071 0.266 9
0.052 0.098 0.216 8
0.047 0.114 0.076 8
0.034 0.103 0.068 9
0.027 0.087 -0.085 8
0.009 0.046 -0.215 9
-0.037 0.022 -0.279 8
-0.112 0.015 -0.273 8
-0.182 0.009 -0.241 9
-0.164 0.008 -0.217 8
-0.2 -0.001 -0.175 7
-0.178 -0.026 -0.102 10
-0.121 -0.04 -0.031 8
-0.054 -0.041 0.013 9
# end
#Thu Feb 26 20:20:59 GMT+08:00 2015-
