# Supplementary material for: Abnormal Gait Behavior Detection for Elderly Based on Enhanced Wigner-Ville Analysis and Cloud Incremental SVM Learning
Source: Hindawi journal article supplement (doi:10.1155/2016/5869238), 2016-01-01
Supplement: f1 [file 5869238.f1.zip › Supplementary Materials/Original Data/Squatting/original__25.txt]

# Accelerometer Values
# filename:  original__25.txt
# Saving start time: Thu Feb 26 20:21:04 GMT+08:00 2015

# sensor resolution: 0.0095825195m/s^2
#Sensorvendor: KIONIX, name: KX023 Accelerometer, type: 1,version : 1, range 39.240005

# X value, Y value, Z value, time diff in ms
-0.057 -0.027 -0.29 9
-0.053 -0.043 -0.338 8
-0.027 -0.053 -0.333 9
0.003 -0.065 -0.27 8
0.003 -0.058 -0.243 7
0.025 -0.078 -0.166 10
0.035 -0.095 -0.104 8
0.035 -0.108 -0.072 9
0.035 -0.117 -0.053 8
0.031 -0.11 -0.031 8
0.016 -0.114 -0.01 9
0.014 -0.103 -0.009 8
-0.009 -0.111 -0.014 8
-0.023 -0.099 -0.013 9
-0.033 -0.082 0.05 8
-0.059 -0.05 0.11 9
-0.053 -0.045 0.099 6
-0.092 0.039 0.063 10
-0.083 0.035 0.057 9
-0.066 0.027 0.024 8
-0.048 0.019 0.003 9
-0.035 0.013 0.002 8
-0.025 0.007 -0.005 8
-0.013 -0.002 -0.012 9
-0.011 -0.002 0.018 8
0.004 -0.014 0.016 9
0.012 -0.009 0.044 8
0.013 0.02 0.032 8
0.012 0.062 0.029 7
0.004 0.101 0.079 10
-0.004 0.136 0.199 9
-0.004 0.123 0.179 8
0.0 0.15 0.315 8
0.0 0.146 0.364 9
-0.012 0.12 0.289 8
-0.025 0.106 0.129 9
-0.022 0.099 -0.02 8
-0.005 0.08 -0.097 8
-0.004 0.072 -0.087 9
0.004 0.06 -0.12 8
0.003 0.063 -0.176 7
0.011 0.043 -0.265 10
0.028 -0.012 -0.321 8
0.052 -0.095 -0.345 9
0.078 -0.183 -0.36 8
0.07 -0.165 -0.324 8
0.072 -0.231 -0.283 9
0.044 -0.264 -0.193 8
0.008 -0.28 -0.127 9
-0.017 -0.287 -0.136 8
-0.025 -0.296 -0.203 8
-0.016 -0.337 -0.271 9
-0.015 -0.303 -0.243 6
-0.005 -0.343 -0.279 11
0.0 -0.383 -0.286 8
0.001 -0.452 -0.276 8
-0.003 -0.524 -0.253 9
-0.01 -0.605 -0.214 8
-0.02 -0.691 -0.129 9
-0.018 -0.622 -0.116 8
-0.034 -0.698 -0.004 8
-0.049 -0.757 0.031 9
-0.059 -0.811 0.011 8
-0.073 -0.843 0.052 8
-0.097 -0.835 0.129 7
-0.129 -0.79 0.145 10
-0.116 -0.711 0.131 9
-0.128 -0.677 0.03 8
-0.082 -0.685 -0.104 9
0.001 -0.798 -0.178 8
0.074 -0.971 -0.2 8
0.125 -1.072 -0.195 9
0.163 -1.166 -0.17 8
0.146 -1.05 -0.153 8
0.16 -1.166 -0.041 9
0.122 -1.19 0.148 8
0.056 -1.098 0.237 7
-0.019 -0.926 0.121 10
0.016 -0.859 -0.041 8
0.085 -0.861 -0.18 9
0.077 -0.775 -0.162 8
0.061 -0.787 -0.329 9
0.052 -0.876 -0.515 8
0.031 -0.935 -0.651 8
0.018 -0.936 -0.535 9
0.04 -0.906 -0.261 8
-0.006 -0.78 -0.072 8
-0.006 -0.702 -0.065 9
-0.105 -0.486 0.014 7
-0.159 -0.301 0.017 10
-0.19 -0.225 -0.088 8
-0.108 -0.289 -0.251 9
0.007 -0.367 -0.486 8
0.034 -0.375 -0.792 8
0.031 -0.338 -0.713 9
0.035 -0.294 -0.895 8
-0.008 -0.127 -0.829 8
-0.103 0.132 -0.488 9
-0.203 0.369 -0.025 8
-0.254 0.556 0.336 9
-0.228 0.5 0.302 6
-0.202 0.729 0.459 10
-0.101 0.923 0.43 9
0.023 0.994 0.261 8
0.14 1.017 -0.061 9
0.192 1.052 -0.39 8
0.225 1.024 -0.536 8
0.202 0.922 -0.483 9
0.185 0.892 -0.434 8
0.055 0.926 -0.151 9
-0.063 0.983 0.377 8
-0.12 1.053 0.979 8
-0.121 1.144 1.432 7
-0.084 1.276 1.515 10
-0.076 1.148 1.364 8
-0.039 1.292 1.016 9
-0.024 1.405 0.48 8
-0.014 1.449 0.037 9
-0.013 1.435 -0.262 8
-0.034 1.427 -0.356 8
-0.067 1.433 -0.166 9
-0.06 1.29 -0.149 8
-0.115 1.275 0.367 9
-0.197 1.207 1.039 8
-0.288 1.127 1.508 7
-0.319 1.093 1.695 10
-0.259 1.144 1.645 8
-0.117 1.257 1.272 9
-0.106 1.131 1.145 8
0.073 1.287 0.428 8
0.227 1.521 -0.316 9
0.349 1.821 -0.742 8
0.283 2.144 -0.755 9
0.02 2.486 -0.264 8
-0.267 2.78 0.492 8
-0.24 2.502 0.443 9
-0.501 2.774 1.148 6
-0.652 2.977 1.654 11
-0.66 3.162 1.839 8
-0.561 3.343 1.671 8
-0.364 3.452 1.252 9
-0.136 3.455 0.85 8
-0.122 3.109 0.765 8
0.04 2.973 0.518 9
0.101 2.695 0.367 8
0.056 2.298 0.304 9
-0.037 1.864 0.291 8
-0.106 1.435 0.296 8
-0.095 1.291 0.267 7
-0.122 0.844 0.391 10
-0.148 0.424 0.634 9
-0.118 0.0 0.86 8
0.044 -0.461 0.976 8
0.259 -0.92 1.014 9
0.491 -1.361 1.101 8
0.687 -1.707 1.217 9
0.619 -1.536 1.095 8
0.717 -1.892 1.122 8
0.609 -2.19 1.171 9
0.346 -2.418 1.309 8
0.103 -2.636 1.353 7
-0.067 -2.769 1.223 10
-0.128 -2.906 0.873 8
-0.115 -2.615 0.786 9
-0.088 -2.789 0.263 8
-0.011 -2.967 -0.325 9
0.07 -3.11 -0.833 8
0.134 -3.156 -1.228 8
0.163 -3.132 -1.594 9
0.139 -3.031 -1.915 8
0.125 -2.728 -1.724 8
0.049 -2.61 -1.953 9
-0.063 -2.444 -1.952 7
-0.18 -2.23 -1.704 10
-0.26 -2.005 -1.31 8
-0.267 -1.772 -0.924 8
-0.186 -1.53 -0.702 9
-0.167 -1.377 -0.632 8
-0.032 -1.143 -0.559 9
0.104 -0.901 -0.533 8
0.176 -0.644 -0.522 8
0.165 -0.308 -0.494 9
0.069 0.103 -0.432 8
-0.132 0.546 -0.329 9
-0.119 0.492 -0.296 6
-0.415 0.913 -0.071 10
-0.732 1.171 0.3 9
-0.995 1.28 0.681 8
-1.078 1.336 0.901 9
-0.894 1.325 0.846 8
-0.553 1.224 0.615 8
-0.498 1.102 0.553 9
-0.13 0.96 0.225 8
0.17 0.823 -0.139 8
0.295 0.7 -0.364 9
0.188 0.601 -0.379 8
0.169 0.541 -0.341 7
-0.406 0.578 0.029 10
-0.365 0.52 0.026 8
-0.651 0.434 0.226 9
-0.823 0.315 0.423 8
-0.871 0.218 0.624 9
-0.722 0.09 0.706 8
-0.405 -0.184 0.598 8
-0.365 -0.166 0.538 9
0.032 -0.591 0.484 8
0.351 -0.993 0.078 9
0.502 -1.294 -0.037 8
0.599 -1.511 -0.032 7
0.617 -1.564 -0.093 10
0.57 -1.462 -0.259 8
0.513 -1.315 -0.233 9
0.45 -1.173 -0.457 8
0.335 -1.022 -0.636 8
0.172 -0.851 -0.746 9
0.052 -0.651 -0.814 8
0.061 -0.462 -0.799 9
0.157 -0.327 -0.673 8
0.142 -0.294 -0.605 8
0.281 -0.215 -0.442 9
0.388 -0.093 -0.324 6
0.417 0.115 -0.268 10
0.447 0.284 -0.235 9
0.521 0.325 -0.21 8
0.55 0.334 -0.218 9
0.495 0.3 -0.196 8
0.46 0.332 -0.223 8
0.368 0.379 -0.238 9
0.196 0.495 -0.299 8
0.052 0.637 -0.38 9
-0.007 0.742 -0.386 8
-0.007 0.808 -0.328 8
-0.006 0.727 -0.295 7
0.037 0.747 -0.209 10
0.089 0.682 -0.098 9
0.096 0.601 -0.016 8
0.042 0.553 0.084 8
-0.046 0.483 0.219 9
-0.093 0.347 0.346 8
-0.084 0.313 0.311 9
-0.057 0.135 0.463 8
0.0 -0.048 0.614 8
0.047 -0.184 0.705 9
0.049 -0.249 0.745 8
0.029 -0.261 0.734 7
0.025 -0.248 0.662 10
0.022 -0.224 0.596 8
0.038 -0.221 0.501 9
0.069 -0.268 0.38 8
0.089 -0.371 0.2 8
0.077 -0.453 -0.003 9
0.051 -0.5 -0.183 8
0.043 -0.539 -0.321 9
0.039 -0.485 -0.289 8
0.044 -0.514 -0.379 8
0.049 -0.499 -0.425 9
0.082 -0.448 -0.445 7
0.139 -0.357 -0.466 10
0.189 -0.217 -0.494 8
0.22 -0.059 -0.513 8
0.198 -0.053 -0.461 9
0.199 0.083 -0.441 8
0.176 0.163 -0.485 9
0.16 0.194 -0.427 8
0.153 0.144 -0.214 8
0.117 0.065 -0.049 9
0.036 0.09 0.074 8
0.033 0.081 0.067 9
-0.049 0.164 0.089 6
-0.093 0.237 0.049 10
-0.093 0.269 0.018 9
-0.073 0.269 0.031 8
-0.052 0.284 0.053 8
-0.023 0.318 0.05 9
-0.02 0.286 0.045 8
0.001 0.307 0.039 9
0.012 0.231 0.042 8
0.026 0.095 0.112 8
0.023 0.006 0.243 9
-0.019 -0.029 0.355 8
-0.017 -0.026 0.32 7
-0.08 -0.035 0.39 10
-0.138 -0.04 0.39 8
-0.169 -0.038 0.317 9
-0.164 -0.036 0.213 8
-0.144 -0.042 0.079 9
-0.126 -0.052 -0.048 8
-0.113 -0.066 -0.095 8
-0.102 -0.059 -0.085 9
-0.033 -0.07 -0.093 8
-0.008 -0.057 -0.081 9
0.016 -0.036 -0.058 8
0.058 -0.022 -0.033 7
0.105 -0.015 0.0 10
0.094 -0.014 0.0 8
0.142 -0.025 0.011 9
0.202 -0.044 -0.005 8
0.23 -0.071 0.012 8
0.184 -0.084 0.094 9
0.103 -0.056 0.166 8
0.024 -0.003 0.173 8
0.022 -0.003 0.156 9
-0.036 0.033 0.153 8
-0.06 0.039 0.192 9
-0.066 0.035 0.199 6
-0.088 0.059 0.146 10
-0.113 0.108 0.096 9
-0.089 0.113 0.083 8
-0.08 0.102 0.075 9
-0.017 0.044 0.06 8
0.052 -0.021 0.01 8
0.095 -0.047 -0.06 9
0.095 -0.03 -0.091 8
0.076 -0.005 -0.051 9
0.059 0.003 0.003 8
0.053 0.002 0.002 8
0.052 0.0 0.028 7
0.047 0.005 0.071 10
0.011 0.027 0.174 9
-0.028 0.052 0.283 8
-0.052 0.061 0.308 8
-0.044 0.046 0.249 9
-0.039 0.041 0.224 8
-0.001 0.006 0.164 8
0.045 -0.041 0.169 9
0.082 -0.1 0.194 8
0.103 -0.162 0.188 9
0.103 -0.224 0.166 8
0.093 -0.202 0.149 7
0.089 -0.251 0.096 10
0.072 -0.247 -0.01 8
0.04 -0.201 -0.15 9
0.004 -0.14 -0.282 8
-0.037 -0.061 -0.345 8
-0.076 0.02 -0.355 9
-0.099 0.074 -0.362 8
-0.089 0.066 -0.326 9
-0.1 0.096 -0.317 8
-0.098 0.111 -0.261 8
-0.084 0.111 -0.168 9
-0.063 0.091 -0.072 6
-0.041 0.053 0.013 11
-0.018 0.01 0.097 8
-0.016 0.009 0.087 8
0.004 -0.016 0.17 9
0.026 -0.011 0.253 8
0.038 0.021 0.3 9
0.048 0.088 0.185 8
0.07 0.122 0.034 8
0.103 0.083 0.058 9
0.092 0.075 0.052 8
0.091 0.036 0.136 8
0.033 0.028 0.191 7
-0.053 0.03 0.201 10
-0.17 0.024 0.173 9
-0.278 0.024 0.146 8
-0.324 0.031 0.118 8
-0.292 0.028 0.106 9
-0.254 0.034 0.068 8
-0.157 0.042 0.006 9
-0.032 0.026 -0.07 8
0.113 -0.039 -0.149 8
0.212 -0.128 -0.235 9
0.211 -0.158 -0.302 8
0.189 -0.142 -0.271 7
0.101 -0.084 -0.308 10
-0.006 -0.007 -0.32 8
-0.101 0.031 -0.322 9
-0.17 0.051 -0.334 8
-0.188 0.069 -0.348 9
-0.167 0.103 -0.345 8
-0.15 0.093 -0.31 8
-0.114 0.132 -0.292 9
-0.067 0.145 -0.254 8
-0.01 0.127 -0.133 9
0.033 0.091 0.077 8
0.029 0.082 0.069 7
0.024 0.03 0.446 10
0.022 0.027 0.401 8
0.022 0.009 0.454 8
0.027 -0.008 0.435 9
0.022 -0.025 0.351 8
0.007 -0.02 0.194 9
-0.004 0.007 -0.015 8
-0.003 0.006 -0.014 8
-0.003 0.042 -0.2 9
0.0 0.067 -0.281 8
0.003 0.079 -0.231 9
0.022 0.059 -0.075 6
0.049 0.008 0.094 10
0.069 -0.04 0.184 9
0.062 -0.036 0.166 8
0.065 -0.065 0.16 9
0.054 -0.064 0.085 8
0.047 -0.045 -0.011 8
0.056 -0.037 -0.081 9
0.079 -0.052 -0.098 8
0.103 -0.069 -0.066 9
0.092 -0.062 -0.06 8
0.113 -0.068 -0.078 8
0.134 -0.073 -0.149 7
0.139 -0.079 -0.123 10
0.113 -0.071 -0.043 8
0.068 -0.035 -0.053 9
0.015 0.013 -0.148 8
0.014 0.011 -0.133 9
-0.029 0.068 -0.233 8
-0.051 0.091 -0.263 8
-0.043 0.058 -0.242 9
-0.023 0.027 -0.203 8
-0.009 0.014 -0.12 9
0.002 0.004 -0.039 8
0.002 0.003 -0.035 7
0.023 -0.004 -0.052 10
0.053 -0.003 -0.132 8
0.077 0.001 -0.184 9
0.091 0.012 -0.195 8
0.087 0.017 -0.167 8
0.056 0.026 -0.105 9
0.05 0.024 -0.094 8
0.013 0.031 -0.019 9
-0.02 0.034 0.013 8
-0.061 0.04 0.01 8
-0.106 0.047 0.024 9
-0.146 0.044 0.065 6
-0.144 0.026 0.063 11
-0.129 0.023 0.057 8
-0.079 -0.002 -0.015 8
-0.003 -0.023 -0.091 9
0.056 -0.033 -0.142 8
0.074 -0.032 -0.171 8
0.067 -0.029 -0.181 9
0.035 -0.009 -0.167 8
0.031 -0.008 -0.15 9
-0.029 0.014 -0.111 8
-0.099 0.042 -0.071 8
-0.166 0.09 -0.095 7
-0.175 0.1 -0.137 10
-0.124 0.056 -0.101 9
-0.114 0.02 -0.021 8
-0.102 0.018 -0.019 8
-0.119 0.02 0.097 9
-0.097 0.03 0.237 8
-0.037 0.005 0.346 9
0.041 -0.044 0.393 8
0.102 -0.076 0.351 8
0.122 -0.064 0.243 9
0.109 -0.058 0.218 8
0.089 -0.018 0.073 7
0.059 0.02 -0.078 10
0.045 0.036 -0.207 8
0.038 0.032 -0.301 9
0.012 0.031 -0.345 8
-0.033 0.044 -0.36 8
-0.029 0.039 -0.324 9
-0.086 0.064 -0.319 8
# end
#Thu Feb 26 20:21:08 GMT+08:00 20150
