# Supplementary material for: Abnormal Gait Behavior Detection for Elderly Based on Enhanced Wigner-Ville Analysis and Cloud Incremental SVM Learning
Source: Hindawi journal article supplement (doi:10.1155/2016/5869238), 2016-01-01
Supplement: f1 [file 5869238.f1.zip › Supplementary Materials/Original Data/Squatting/original__26.txt]

# Accelerometer Values
# filename:  original__26.txt
# Saving start time: Thu Feb 26 20:21:11 GMT+08:00 2015

# sensor resolution: 0.0095825195m/s^2
#Sensorvendor: KIONIX, name: KX023 Accelerometer, type: 1,version : 1, range 39.240005

# X value, Y value, Z value, time diff in ms
-0.071 -0.081 -0.203 8
-0.029 -0.118 -0.136 8
0.007 -0.13 -0.061 9
0.043 -0.095 0.007 8
0.073 -0.059 0.065 9
0.087 -0.044 0.117 8
0.076 -0.028 0.15 8
0.068 -0.025 0.135 9
0.035 0.002 0.148 8
-0.013 0.042 0.142 8
-0.06 0.088 0.128 7
-0.095 0.118 0.089 10
-0.106 0.131 0.038 9
-0.084 0.132 0.001 8
-0.075 0.119 0.001 8
-0.029 0.094 -0.019 9
0.018 0.05 -0.015 8
0.048 0.029 0.024 9
0.049 0.04 0.076 8
0.044 0.049 0.088 8
0.046 0.031 0.06 9
0.042 0.028 0.054 8
0.039 0.004 0.008 7
0.022 0.004 -0.022 10
-0.001 0.009 -0.007 8
-0.027 -0.001 0.03 9
-0.042 -0.017 0.042 8
-0.036 -0.032 0.023 8
-0.032 -0.029 0.02 9
-0.011 -0.047 -0.009 8
0.009 -0.057 -0.032 9
0.021 -0.044 -0.026 8
0.029 -0.038 0.006 8
0.035 -0.064 0.059 9
0.032 -0.058 0.053 7
0.025 -0.067 0.107 10
0.017 -0.053 0.121 8
0.015 -0.054 0.075 8
0.021 -0.067 -0.024 9
0.028 -0.087 -0.128 8
0.021 -0.087 -0.18 9
0.019 -0.078 -0.162 8
0.003 -0.026 -0.165 8
-0.012 0.025 -0.123 9
-0.018 0.038 -0.058 8
-0.023 0.05 -0.017 9
-0.023 0.061 -0.013 6
-0.013 0.048 -0.028 10
-0.011 0.044 -0.025 9
-0.003 0.031 -0.029 8
0.011 0.017 -0.002 9
0.038 -0.011 0.021 8
0.053 -0.03 0.04 8
0.042 -0.025 0.064 9
0.017 -0.018 0.077 8
0.015 -0.016 0.069 9
-0.006 -0.044 0.062 8
-0.016 -0.08 0.023 8
-0.012 -0.1 -0.029 7
0.007 -0.129 -0.054 10
0.043 -0.173 -0.045 9
0.072 -0.196 -0.027 8
0.065 -0.176 -0.024 8
0.066 -0.179 -0.042 9
0.051 -0.168 -0.084 8
0.037 -0.16 -0.06 8
0.005 -0.163 -0.065 9
-0.034 -0.166 -0.18 8
-0.048 -0.175 -0.274 9
-0.043 -0.157 -0.246 8
-0.04 -0.18 -0.259 7
-0.024 -0.207 -0.231 10
0.008 -0.269 -0.218 8
0.055 -0.374 -0.223 9
0.1 -0.491 -0.225 8
0.12 -0.585 -0.219 8
0.108 -0.526 -0.197 9
0.087 -0.589 -0.211 8
0.047 -0.621 -0.276 9
0.03 -0.662 -0.33 8
0.034 -0.706 -0.31 8
0.036 -0.745 -0.242 9
0.032 -0.67 -0.218 6
0.021 -0.715 -0.131 11
-0.01 -0.778 -0.062 8
-0.059 -0.888 -0.015 8
-0.111 -1.014 0.048 9
-0.184 -1.099 0.098 8
-0.246 -1.136 0.087 8
-0.222 -1.022 0.078 9
-0.223 -1.043 0.038 8
-0.181 -1.05 0.0 9
-0.119 -1.079 -0.07 8
-0.045 -1.135 -0.23 8
0.031 -1.237 -0.418 7
0.08 -1.348 -0.437 10
0.072 -1.213 -0.393 9
0.03 -1.229 -0.229 8
0.01 -1.19 -0.05 8
-0.009 -1.145 0.057 9
-0.073 -1.061 0.105 8
-0.081 -0.976 0.113 9
-0.029 -0.898 0.016 8
-0.026 -0.808 0.015 8
0.025 -0.731 -0.264 9
0.189 -0.689 -0.583 8
0.313 -0.647 -0.883 7
0.236 -0.564 -1.149 10
0.133 -0.487 -1.207 8
0.003 -0.401 -1.016 9
0.003 -0.361 -0.915 8
-0.127 -0.29 -0.634 8
-0.223 -0.258 -0.353 9
-0.266 -0.24 -0.063 8
-0.26 -0.165 0.132 9
-0.234 -0.021 0.123 8
-0.208 0.147 -0.025 8
-0.187 0.132 -0.023 9
-0.186 0.336 -0.112 7
-0.094 0.485 -0.054 10
-0.011 0.567 -0.013 8
-0.033 0.705 -0.023 8
-0.043 0.913 0.054 9
-0.055 1.13 0.191 8
-0.05 1.017 0.172 9
-0.041 1.17 0.303 8
-0.001 1.238 0.426 8
0.045 1.255 0.523 9
0.083 1.244 0.614 8
0.093 1.237 0.832 9
0.084 1.113 0.749 6
0.053 1.192 1.05 10
0.007 1.352 1.24 9
-0.016 1.516 1.297 8
0.003 1.658 1.293 9
0.037 1.797 1.309 8
0.078 1.885 1.351 8
0.132 1.968 1.426 9
0.119 1.771 1.283 8
0.149 1.91 1.363 8
0.132 2.027 1.342 9
0.096 2.058 1.207 8
0.047 2.063 0.899 7
-0.062 2.211 0.413 10
-0.183 2.422 -0.161 8
-0.164 2.18 -0.145 9
-0.187 2.455 -0.595 8
-0.12 2.762 -0.767 9
-0.064 2.973 -0.676 8
-0.064 3.076 -0.334 8
-0.128 3.068 0.139 9
-0.115 2.761 0.125 8
-0.232 2.698 0.113 9
-0.351 2.621 0.92 8
-0.456 2.545 0.989 7
-0.496 2.453 0.745 10
-0.44 2.399 0.185 8
-0.352 2.356 -0.451 9
-0.317 2.121 -0.406 8
-0.204 2.022 -0.881 8
-0.093 1.809 -1.06 9
-0.003 1.489 -0.924 8
0.113 1.121 -0.502 8
0.209 0.791 0.024 9
0.266 0.471 0.413 8
0.239 0.424 0.372 9
0.272 0.081 0.609 6
0.288 -0.23 0.748 10
0.3 -0.446 0.797 9
0.297 -0.589 0.772 8
0.306 -0.822 0.775 9
0.357 -1.137 0.826 8
0.322 -1.024 0.744 8
0.412 -1.262 0.829 9
0.539 -1.48 1.037 8
0.681 -1.822 1.306 9
0.781 -2.26 1.432 8
0.779 -2.584 1.393 8
0.701 -2.326 1.254 7
0.455 -2.458 1.118 10
-0.007 -2.439 0.887 9
-0.459 -2.329 0.555 8
-0.723 -2.215 0.2 8
-0.734 -2.134 -0.13 9
-0.598 -2.071 -0.44 8
-0.424 -1.976 -0.678 9
-0.381 -1.778 -0.61 8
-0.21 -1.711 -0.724 8
-0.06 -1.739 -0.727 9
0.017 -1.772 -0.687 8
0.02 -1.714 -0.629 7
-0.004 -1.613 -0.556 10
-0.028 -1.518 -0.498 8
-0.026 -1.366 -0.448 9
-0.029 -1.277 -0.417 8
-0.022 -1.12 -0.408 8
-0.033 -0.867 -0.448 9
-0.043 -0.595 -0.55 8
-0.039 -0.38 -0.687 9
-0.035 -0.342 -0.618 8
-0.047 -0.157 -0.722 8
-0.067 0.031 -0.721 9
-0.073 0.207 -0.563 6
-0.073 0.344 -0.291 11
-0.068 0.437 -0.011 8
-0.041 0.504 0.227 8
-0.036 0.453 0.205 9
0.014 0.486 0.358 8
0.069 0.487 0.405 9
0.11 0.47 0.351 8
0.123 0.445 0.23 8
0.097 0.421 0.127 9
-0.001 0.404 0.095 8
-0.001 0.363 0.085 8
-0.141 0.341 0.094 7
-0.251 0.296 0.085 10
-0.294 0.237 0.037 9
-0.287 0.154 -0.002 8
-0.255 0.025 -0.002 8
-0.212 -0.147 0.008 9
-0.191 -0.132 0.007 8
-0.16 -0.312 -0.019 9
-0.118 -0.452 -0.08 8
-0.059 -0.535 -0.129 8
-0.03 -0.576 -0.171 9
-0.032 -0.596 -0.242 8
-0.029 -0.536 -0.218 7
-0.012 -0.557 -0.346 10
0.04 -0.584 -0.49 8
0.094 -0.58 -0.599 9
0.137 -0.598 -0.672 8
0.172 -0.619 -0.736 9
0.188 -0.55 -0.761 8
0.182 -0.449 -0.668 8
0.164 -0.404 -0.601 9
0.14 -0.304 -0.435 8
0.111 -0.19 -0.253 9
0.088 -0.097 -0.062 8
0.095 -0.035 0.094 7
0.145 0.007 0.158 10
0.196 0.041 0.088 8
0.176 0.037 0.079 8
0.205 0.075 -0.078 9
0.204 0.129 -0.227 8
0.172 0.2 -0.304 9
0.133 0.273 -0.302 8
0.111 0.296 -0.224 8
0.1 0.266 -0.202 9
0.095 0.236 -0.04 8
0.078 0.208 0.147 9
0.038 0.247 0.252 6
0.01 0.302 0.229 10
0.008 0.315 0.12 9
0.0 0.323 0.001 8
0.0 0.291 0.001 9
-0.035 0.312 -0.07 8
-0.077 0.32 -0.06 8
-0.091 0.27 0.043 9
-0.079 0.156 0.192 8
-0.066 0.032 0.308 9
-0.072 -0.05 0.365 8
-0.065 -0.045 0.328 8
-0.078 -0.096 0.347 7
-0.078 -0.123 0.316 10
-0.075 -0.108 0.22 9
-0.078 -0.084 0.052 8
-0.084 -0.076 -0.128 8
-0.087 -0.078 -0.243 9
-0.078 -0.07 -0.218 8
-0.08 -0.087 -0.271 8
-0.06 -0.12 -0.265 9
-0.02 -0.165 -0.189 8
0.022 -0.189 -0.069 9
0.071 -0.196 0.035 8
0.064 -0.177 0.032 7
0.106 -0.183 0.06 10
0.122 -0.177 -0.005 8
0.099 -0.149 -0.099 9
0.053 -0.096 -0.162 8
0.007 -0.049 -0.205 8
-0.015 -0.031 -0.209 9
-0.004 -0.03 -0.15 8
-0.003 -0.027 -0.135 9
0.027 -0.036 -0.002 8
0.048 -0.033 0.153 8
0.055 0.019 0.251 9
0.058 0.09 0.278 6
0.056 0.136 0.272 11
0.033 0.188 0.262 8
0.029 0.169 0.236 8
-0.017 0.246 0.228 9
-0.081 0.289 0.234 8
-0.133 0.28 0.249 9
-0.155 0.23 0.255 8
-0.151 0.161 0.248 8
-0.127 0.112 0.228 9
-0.114 0.101 0.205 8
-0.094 0.082 0.176 8
-0.092 0.083 0.135 7
-0.117 0.111 0.053 10
-0.112 0.034 -0.06 9
-0.111 -0.044 -0.189 8
-0.1 -0.039 -0.17 8
-0.08 -0.075 -0.167 9
-0.009 -0.125 -0.004 8
0.055 -0.14 0.158 9
0.128 -0.191 0.309 8
0.179 -0.237 0.456 8
0.194 -0.259 0.559 9
0.175 -0.233 0.503 8
0.096 -0.141 0.374 7
-0.044 0.081 0.136 10
-0.12 0.176 0.04 8
-0.141 0.091 0.008 9
-0.141 0.029 0.006 8
-0.163 0.065 0.019 8
-0.147 0.059 0.017 9
-0.187 0.133 0.029 8
-0.132 0.16 0.021 9
-0.012 0.103 -0.034 8
0.076 0.006 -0.096 8
0.159 -0.096 -0.184 9
0.143 -0.086 -0.165 7
0.239 -0.154 -0.212 10
0.307 -0.175 -0.137 8
0.356 -0.195 -0.039 8
0.386 -0.221 0.041 9
0.37 -0.245 0.124 8
0.32 -0.265 0.196 9
0.248 -0.269 0.269 8
0.223 -0.242 0.242 8
0.133 -0.227 0.319 9
0.023 -0.165 0.33 8
-0.056 -0.082 0.253 9
-0.086 -0.027 0.124 6
-0.091 0.013 -0.006 10
-0.083 0.071 -0.082 9
-0.075 0.064 -0.073 8
-0.077 0.12 -0.071 9
-0.107 0.163 -0.032 8
-0.14 0.204 0.007 8
-0.145 0.208 0.012 9
-0.115 0.226 -0.123 8
-0.07 0.198 -0.206 9
-0.063 0.178 -0.185 8
-0.009 0.05 -0.113 8
0.034 -0.054 -0.067 7
0.05 -0.103 -0.06 10
0.041 -0.118 -0.055 8
0.015 -0.109 -0.032 9
-0.01 -0.084 -0.008 8
-0.009 -0.076 -0.007 9
-0.008 -0.054 0.022 8
0.014 -0.056 0.045 8
0.066 -0.081 0.061 9
0.135 -0.111 0.086 8
0.17 -0.135 0.087 9
0.164 -0.137 0.129 8
0.147 -0.124 0.116 7
0.096 -0.099 0.236 10
0.003 0.008 0.314 8
-0.094 0.188 0.244 9
-0.147 0.318 0.059 8
-0.139 0.346 -0.112 8
-0.112 0.294 -0.231 9
-0.101 0.265 -0.208 8
-0.078 0.183 -0.26 9
-0.07 0.117 -0.241 8
-0.097 0.083 -0.185 8
-0.144 0.051 -0.123 9
-0.129 0.046 -0.11 6
-0.14 -0.013 -0.042 10
-0.095 -0.011 -0.038 9
-0.024 -0.105 -0.04 8
0.047 -0.112 -0.041 9
0.094 -0.124 -0.028 8
0.087 -0.114 -0.02 8
0.052 -0.066 -0.017 9
0.047 -0.059 -0.015 8
0.005 -0.026 -0.008 9
-0.025 -0.038 0.001 8
-0.041 -0.064 0.012 8
-0.057 -0.068 0.027 7
-0.064 -0.061 0.046 10
-0.042 -0.065 0.091 9
-0.038 -0.058 0.082 8
0.006 -0.089 0.203 8
0.028 -0.119 0.344 9
0.024 -0.115 0.376 8
0.016 -0.063 0.261 9
0.007 0.014 0.081 8
-0.007 0.073 -0.053 8
-0.006 0.066 -0.048 9
-0.012 0.076 -0.112 8
-0.004 0.028 -0.119 7
0.001 -0.041 -0.095 10
0.0 -0.091 -0.056 8
0.004 -0.116 -0.031 9
0.016 -0.124 -0.038 8
0.015 -0.111 -0.034 8
0.049 -0.127 -0.048 9
0.08 -0.141 -0.055 8
0.059 -0.123 -0.044 9
-0.001 -0.055 -0.141 8
-0.058 0.009 -0.194 8
-0.067 -0.026 -0.093 9
-0.06 -0.023 -0.084 7
-0.059 -0.104 -0.027 10
-0.097 -0.122 -0.014 8
-0.122 -0.092 -0.01 8
-0.101 -0.061 0.062 9
-0.034 -0.04 0.25 8
0.018 -0.007 0.468 9
0.016 -0.006 0.421 8
0.0 0.113 0.551 8
-0.034 0.289 0.52 9
-0.015 0.373 0.353 8
0.049 0.302 0.133 9
0.102 0.138 -0.036 6
0.101 0.018 -0.101 10
0.091 0.016 -0.09 9
0.029 -0.01 -0.078 8
-0.051 0.014 -0.076 9
-0.1 0.081 -0.133 8
-0.096 0.176 -0.204 8
-0.04 0.234 -0.24 9
0.023 0.228 -0.222 8
0.02 0.205 -0.2 8
0.064 0.169 -0.107 9
0.076 0.151 0.066 8
0.055 0.153 0.26 7
0.022 0.171 0.418 10
-0.004 0.193 0.499 8
-0.011 0.216 0.511 9
-0.01 0.194 0.46 8
0.0 0.213 0.416 9
0.01 0.243 0.325 8
0.015 0.285 0.241 8
0.029 0.315 0.184 9
0.06 0.316 0.169 8
0.109 0.269 0.202 9
0.098 0.242 0.181 8
0.164 0.15 0.221 7
0.23 0.056 0.249 10
0.219 0.045 0.228 8
0.138 0.115 0.162 9
0.078 0.207 0.04 8
0.058 0.272 -0.09 8
0.052 0.245 -0.081 9
0.05 0.27 -0.101 8
0.047 0.269 -0.039 8
0.038 0.263 0.063 9
0.006 0.278 0.165 8
-0.034 0.319 0.227 9
-0.031 0.287 0.204 6
-0.065 0.323 0.232 10
-0.088 0.322 0.235 9
-0.103 0.296 0.226 8
-0.115 0.265 0.21 9
-0.125 0.24 0.189 8
-0.145 0.234 0.166 8
-0.179 0.258 0.137 9
-0.161 0.232 0.123 8
-0.196 0.276 0.073 9
-0.18 0.264 -0.01 8
-0.116 0.16 -0.085 8
-0.058 0.021 -0.078 7
-0.034 -0.069 -0.02 10
-0.033 -0.11 0.038 9
-0.03 -0.099 0.034 8
-0.036 -0.115 0.066 8
-0.035 -0.116 0.049 9
-0.014 -0.121 -0.001 8
0.017 -0.135 -0.093 9
0.048 -0.154 -0.234 8
0.081 -0.184 -0.392 8
0.073 -0.165 -0.353 9
0.101 -0.207 -0.45 8
0.105 -0.243 -0.418 7
0.069 -0.26 -0.264 10
0.016 -0.279 -0.064 8
-0.033 -0.305 0.075 9
-0.079 -0.325 0.144 8
-0.071 -0.293 0.13 8
-0.12 -0.331 0.136 9
-0.139 -0.393 0.025 8
-0.101 -0.466 -0.209 9
-0.019 -0.54 -0.454 8
0.089 -0.617 -0.632 8
0.164 -0.689 -0.71 9
0.148 -0.62 -0.639 7
0.133 -0.627 -0.605 10
0.058 -0.539 -0.498 8
-0.02 -0.433 -0.378 8
-0.052 -0.368 -0.29 9
-0.027 -0.35 -0.241 8
-0.024 -0.366 -0.245 9
-0.021 -0.329 -0.22 8
0.111 -0.339 -0.312 8
0.215 -0.38 -0.403 9
0.32 -0.458 -0.45 8
0.331 -0.427 -0.507 9
0.298 -0.384 -0.457 6
0.177 -0.199 -0.611 10
0.02 0.016 -0.55 9
-0.054 0.107 -0.552 8
-0.112 0.162 -0.211 8
-0.18 0.322 0.065 9
-0.182 0.525 0.281 8
-0.135 0.675 0.494 9
-0.122 0.607 0.444 8
-0.063 0.677 0.4 8
0.025 0.681 0.587 9
0.2 0.634 0.452 8
0.394 0.528 0.248 7
0.452 0.434 0.056 10
0.353 0.418 -0.044 8
0.318 0.376 -0.04 9
# end
#Thu Feb 26 20:21:16 GMT+08:00 20150
