# Supplementary material for: Abnormal Gait Behavior Detection for Elderly Based on Enhanced Wigner-Ville Analysis and Cloud Incremental SVM Learning
Source: Hindawi journal article supplement (doi:10.1155/2016/5869238), 2016-01-01
Supplement: f1 [file 5869238.f1.zip › Supplementary Materials/Original Data/Squatting/original__27.txt]

# Accelerometer Values
# filename:  original__27.txt
# Saving start time: Thu Feb 26 20:21:19 GMT+08:00 2015

# sensor resolution: 0.0095825195m/s^2
#Sensorvendor: KIONIX, name: KX023 Accelerometer, type: 1,version : 1, range 39.240005

# X value, Y value, Z value, time diff in ms
-0.031 -0.037 -0.419 8
-0.05 -0.039 -0.398 9
-0.049 -0.01 -0.332 8
-0.046 0.021 -0.287 8
-0.041 0.019 -0.259 9
-0.028 0.005 -0.238 8
-0.001 -0.039 -0.202 9
0.024 -0.072 -0.126 6
0.036 -0.075 -0.026 10
0.031 -0.057 0.066 9
0.013 -0.039 0.149 8
0.012 -0.035 0.134 9
-0.013 -0.019 0.207 8
-0.027 0.012 0.257 8
-0.029 0.042 0.271 9
-0.021 0.049 0.239 8
-0.011 0.062 0.166 8
0.002 0.06 0.061 9
0.002 0.054 0.055 8
0.008 0.044 -0.053 7
0.003 0.048 -0.146 10
-0.005 0.042 -0.216 8
-0.011 0.018 -0.243 9
-0.017 0.016 -0.239 8
-0.033 0.046 -0.215 9
-0.029 0.042 -0.194 8
-0.037 0.061 -0.13 8
-0.021 0.037 -0.046 9
0.009 -0.002 0.033 8
0.027 -0.024 0.121 9
0.013 -0.034 0.2 8
0.011 -0.031 0.18 7
-0.017 -0.043 0.193 10
-0.032 -0.067 0.128 8
-0.036 -0.092 0.04 9
-0.028 -0.106 -0.034 8
-0.005 -0.112 -0.104 8
0.025 -0.12 -0.166 9
0.07 -0.132 -0.19 8
0.063 -0.119 -0.171 9
0.096 -0.126 -0.129 8
0.07 -0.106 -0.035 8
-0.005 -0.034 0.038 9
-0.07 0.036 0.039 6
-0.083 0.05 -0.03 10
-0.074 0.045 -0.027 9
-0.051 0.029 -0.024 8
-0.032 0.015 -0.127 9
-0.011 -0.002 -0.147 8
0.028 -0.04 -0.165 8
0.067 -0.072 -0.16 9
0.07 -0.062 -0.134 8
0.063 -0.056 -0.12 9
0.015 -0.005 -0.08 8
-0.037 0.038 0.009 8
-0.064 0.045 0.122 7
-0.074 0.039 0.204 10
-0.065 0.024 0.274 9
-0.036 -0.021 0.318 8
-0.032 -0.018 0.286 8
0.014 -0.081 0.267 9
0.068 -0.125 0.187 8
0.09 -0.148 0.05 9
0.079 -0.159 -0.065 8
0.039 -0.156 -0.112 8
-0.021 -0.14 -0.172 9
-0.019 -0.126 -0.155 8
-0.064 -0.121 -0.227 7
-0.09 -0.139 -0.264 10
-0.097 -0.16 -0.269 8
-0.067 -0.242 -0.304 9
0.018 -0.373 -0.36 8
0.105 -0.482 -0.412 8
0.095 -0.434 -0.371 9
0.165 -0.533 -0.433 8
0.257 -0.606 -0.452 9
0.319 -0.656 -0.423 8
0.308 -0.695 -0.385 8
0.24 -0.719 -0.355 9
0.216 -0.647 -0.32 7
0.128 -0.699 -0.297 10
0.061 -0.781 -0.283 8
0.043 -0.883 -0.27 8
0.061 -1.045 -0.27 9
0.103 -1.206 -0.342 8
0.124 -1.265 -0.494 9
0.058 -1.259 -0.658 8
0.052 -1.133 -0.592 8
-0.067 -1.131 -0.655 9
-0.191 -1.15 -0.531 8
-0.287 -1.201 -0.298 9
-0.321 -1.296 -0.085 6
-0.296 -1.387 0.058 10
-0.248 -1.405 0.154 9
-0.224 -1.265 0.138 8
-0.157 -1.277 0.22 8
-0.084 -1.293 0.291 9
-0.048 -1.276 0.293 8
-0.069 -1.219 0.217 9
-0.13 -1.144 0.116 8
-0.177 -1.112 0.022 8
-0.159 -1.0 0.02 9
-0.148 -0.99 -0.059 8
-0.112 -0.923 -0.099 7
-0.053 -0.872 -0.078 10
0.047 -0.82 -0.06 8
0.122 -0.7 -0.073 9
0.165 -0.568 -0.058 8
0.149 -0.511 -0.052 9
0.177 -0.379 -0.018 8
0.191 -0.213 -0.006 8
0.182 -0.046 -0.018 9
0.221 0.068 -0.074 8
0.292 0.151 -0.236 9
0.318 0.284 -0.48 8
0.286 0.255 -0.432 7
0.275 0.467 -0.638 10
0.199 0.707 -0.739 8
0.127 0.868 -0.702 8
0.123 0.959 -0.413 9
0.047 1.137 -0.01 8
-0.121 1.408 0.385 9
-0.109 1.267 0.347 8
-0.274 1.592 0.691 8
-0.44 1.947 0.9 9
-0.558 2.165 1.03 8
-0.567 2.172 1.074 9
-0.51 1.955 0.967 6
-0.348 2.209 1.054 10
-0.313 1.988 0.949 9
-0.141 2.013 0.923 8
0.084 2.011 0.831 9
0.286 2.024 0.727 8
0.395 2.154 0.702 8
0.376 2.375 0.845 9
0.199 2.653 1.132 8
0.179 2.388 1.019 9
-0.111 2.614 1.427 8
-0.391 2.708 1.791 8
-0.521 2.776 1.916 7
-0.434 2.82 1.819 10
-0.206 2.787 1.452 9
-0.185 2.671 0.896 8
-0.167 2.404 0.806 8
0.313 2.322 0.269 9
0.361 2.328 -0.094 8
0.293 2.294 -0.193 8
0.176 2.136 -0.141 9
-0.017 1.971 -0.074 8
-0.015 1.774 -0.026 9
-0.232 1.596 -0.023 8
-0.448 1.398 -0.014 7
-0.589 1.204 -0.034 10
-0.54 0.996 -0.034 8
-0.427 0.772 -0.075 9
-0.39 0.669 -0.256 8
-0.351 0.602 -0.23 8
-0.425 0.686 -0.469 9
-0.52 0.715 -0.549 8
-0.442 0.556 -0.435 9
-0.258 0.363 -0.225 8
-0.073 0.194 0.038 8
0.142 -0.063 0.258 9
0.128 -0.056 0.232 6
0.367 -0.348 0.334 11
0.557 -0.503 0.434 8
0.688 -0.549 0.718 8
0.784 -0.625 1.019 9
0.829 -0.71 1.107 8
0.808 -0.788 1.006 9
0.727 -0.709 0.905 8
0.605 -0.84 0.788 8
0.442 -1.065 0.758 9
0.316 -1.328 0.747 8
0.235 -1.559 0.709 8
0.204 -1.755 0.636 7
0.191 -1.861 0.486 10
0.172 -1.675 0.437 9
0.108 -1.723 0.2 8
0.034 -1.774 -0.08 8
0.013 -1.85 -0.299 9
0.019 -1.898 -0.408 8
-0.045 -1.862 -0.446 9
-0.228 -1.689 -0.439 8
-0.205 -1.52 -0.395 8
-0.467 -1.243 -0.373 9
-0.669 -1.097 -0.359 8
-0.63 -1.129 -0.435 7
-0.402 -1.172 -0.646 10
-0.108 -1.231 -0.869 8
0.208 -1.293 -1.074 9
0.187 -1.164 -0.967 8
0.498 -1.206 -1.172 9
0.686 -1.197 -1.221 8
0.713 -1.108 -1.046 8
0.664 -0.986 -0.765 9
0.632 -0.893 -0.524 8
0.633 -0.826 -0.333 9
0.57 -0.743 -0.3 8
0.556 -0.665 -0.161 7
0.494 -0.49 -0.146 10
0.389 -0.225 -0.211 8
0.211 0.066 -0.276 8
0.008 0.327 -0.307 9
-0.141 0.521 -0.332 8
-0.127 0.469 -0.299 9
-0.259 0.611 -0.364 8
-0.377 0.696 -0.372 8
-0.471 0.713 -0.275 9
-0.52 0.661 -0.091 8
-0.499 0.515 0.188 9
-0.449 0.463 0.169 6
-0.388 0.249 0.461 10
-0.317 0.01 0.638 9
-0.242 -0.187 0.687 8
-0.191 -0.286 0.658 9
-0.168 -0.321 0.549 8
-0.156 -0.324 0.369 8
-0.141 -0.32 0.188 9
-0.127 -0.288 0.169 8
-0.098 -0.289 0.028 9
-0.053 -0.301 -0.101 8
-0.015 -0.321 -0.22 8
0.012 -0.333 -0.312 7
0.042 -0.335 -0.377 10
0.067 -0.33 -0.424 8
0.06 -0.297 -0.382 9
0.07 -0.292 -0.382 8
0.045 -0.291 -0.312 9
0.001 -0.273 -0.217 8
-0.04 -0.227 -0.119 8
-0.065 -0.174 -0.045 9
-0.057 -0.128 -0.037 8
-0.051 -0.115 -0.034 9
-0.015 -0.068 -0.079 8
0.039 -0.014 -0.138 7
0.094 0.033 -0.194 10
0.12 0.067 -0.242 8
0.106 0.107 -0.285 9
0.082 0.159 -0.312 8
0.074 0.143 -0.281 8
0.04 0.202 -0.301 9
0.0 0.274 -0.349 8
0.0 0.313 -0.367 9
0.043 0.276 -0.261 8
0.074 0.202 -0.095 8
0.042 0.134 0.043 9
0.038 0.121 0.039 6
-0.05 0.096 0.137 11
-0.152 0.157 0.204 8
-0.218 0.24 0.259 8
-0.242 0.277 0.297 9
-0.213 0.249 0.313 8
-0.133 0.16 0.33 8
-0.119 0.144 0.297 9
-0.025 0.05 0.338 8
0.054 -0.028 0.376 9
0.116 -0.092 0.367 8
0.176 -0.131 0.295 8
0.219 -0.151 0.189 7
0.219 -0.163 0.068 10
0.197 -0.147 0.061 9
0.149 -0.151 -0.054 8
0.065 -0.133 -0.139 8
-0.018 -0.106 -0.2 9
-0.059 -0.08 -0.234 8
-0.051 -0.061 -0.236 9
0.002 -0.054 -0.202 8
0.001 -0.049 -0.182 8
0.076 -0.051 -0.135 9
0.125 -0.056 -0.087 8
0.134 -0.065 -0.057 7
0.102 -0.072 -0.085 10
0.093 -0.055 -0.189 8
0.134 -0.051 -0.291 9
0.121 -0.046 -0.261 8
0.137 -0.055 -0.259 8
0.092 -0.033 -0.239 9
0.021 0.03 -0.312 8
-0.023 0.096 -0.387 9
-0.005 0.094 -0.386 8
0.064 0.045 -0.251 8
0.057 0.04 -0.226 9
0.099 0.0 -0.003 7
0.049 -0.017 0.227 10
-0.052 -0.003 0.414 8
-0.135 0.042 0.442 8
-0.148 0.095 0.337 9
-0.086 0.094 0.241 8
-0.077 0.085 0.217 9
-0.028 0.029 0.191 8
-0.037 -0.012 0.177 8
-0.079 0.008 0.124 9
-0.123 0.059 0.052 8
-0.141 0.068 0.003 9
-0.127 0.061 0.002 6
-0.119 0.028 -0.003 10
-0.094 -0.017 0.021 9
-0.076 -0.051 0.037 8
-0.075 -0.065 0.042 9
-0.073 -0.066 0.031 8
-0.059 -0.056 -0.007 8
-0.053 -0.041 -0.049 9
-0.027 -0.037 -0.044 8
-0.006 -0.033 -0.075 8
0.003 -0.033 -0.084 9
0.033 -0.037 -0.065 8
0.065 -0.049 -0.049 7
0.094 -0.054 -0.057 10
0.085 -0.049 -0.052 8
0.119 -0.048 -0.059 9
0.125 -0.044 -0.057 8
0.073 -0.03 -0.05 9
-0.012 -0.01 -0.032 8
-0.074 0.018 -0.011 8
-0.103 0.075 0.0 9
-0.093 0.067 0.0 8
-0.103 0.12 0.023 9
-0.097 0.124 0.06 8
-0.069 0.085 0.111 7
-0.036 0.044 0.175 10
-0.016 0.015 0.233 8
0.003 -0.008 0.258 9
0.002 -0.007 0.232 8
0.034 -0.018 0.204 8
0.075 -0.03 0.143 9
0.117 -0.042 0.075 8
0.145 -0.053 0.018 9
0.134 -0.054 -0.017 8
0.08 -0.046 -0.033 8
0.072 -0.041 -0.03 9
0.005 -0.029 -0.008 6
-0.04 -0.02 0.048 11
-0.078 -0.006 0.083 8
-0.091 0.012 0.066 8
-0.078 0.015 0.001 9
-0.066 0.018 -0.077 8
-0.059 0.016 -0.069 8
-0.045 0.023 -0.156 9
-0.041 0.023 -0.251 8
-0.056 0.02 -0.292 9
-0.06 0.01 -0.253 8
-0.055 -0.006 -0.18 8
-0.05 -0.006 -0.162 7
-0.057 -0.009 -0.098 10
-0.085 0.013 -0.044 9
-0.122 0.054 -0.01 8
-0.144 0.095 0.004 8
-0.135 0.091 0.007 9
-0.085 0.034 0.015 8
-0.017 -0.019 0.022 9
-0.015 -0.017 0.02 8
0.033 -0.047 0.019 8
0.059 -0.058 0.016 9
0.073 -0.058 0.029 8
0.062 -0.046 0.078 7
0.029 -0.03 0.166 10
-0.008 -0.007 0.242 8
-0.008 -0.007 0.218 9
-0.032 0.017 0.212 8
-0.04 0.025 0.122 8
-0.025 0.008 0.031 9
0.012 -0.019 0.015 8
0.03 -0.038 0.059 9
0.025 -0.046 0.065 8
0.022 -0.042 0.058 8
0.009 -0.042 0.002 9
0.004 -0.036 -0.069 7
0.015 -0.021 -0.104 10
0.0 0.022 -0.106 8
-0.049 0.087 -0.111 8
-0.088 0.14 -0.12 9
-0.079 0.126 -0.108 8
-0.089 0.143 -0.115 9
-0.075 0.127 -0.109 8
-0.055 0.074 -0.09 8
-0.024 0.007 -0.07 9
0.003 -0.041 -0.065 8
0.01 -0.076 -0.061 9
0.009 -0.068 -0.054 6
0.001 -0.083 -0.034 10
-0.01 -0.07 -0.019 9
-0.022 -0.043 -0.033 8
-0.022 -0.008 -0.044 8
0.0 0.015 -0.027 9
0.035 0.014 0.005 8
0.032 0.012 0.004 9
0.058 -0.002 0.028 8
0.059 -0.013 0.041 8
0.046 -0.022 0.083 9
-0.01 0.001 0.134 8
-0.092 0.061 0.147 7
-0.145 0.113 0.138 10
-0.13 0.102 0.124 8
-0.152 0.133 0.075 9
-0.132 0.152 0.005 8
-0.076 0.103 -0.023 9
-0.012 -0.003 0.006 8
0.033 -0.072 0.044 8
0.047 -0.093 0.015 9
0.042 -0.083 0.013 8
0.044 -0.083 -0.061 9
0.047 -0.074 -0.131 8
# end
#Thu Feb 26 20:21:22 GMT+08:00 20150
