# Supplementary material for: Abnormal Gait Behavior Detection for Elderly Based on Enhanced Wigner-Ville Analysis and Cloud Incremental SVM Learning
Source: Hindawi journal article supplement (doi:10.1155/2016/5869238), 2016-01-01
Supplement: f1 [file 5869238.f1.zip › Supplementary Materials/Original Data/Squatting/original__28.txt]

# Accelerometer Values
# filename:  original__28.txt
# Saving start time: Thu Feb 26 20:21:26 GMT+08:00 2015

# sensor resolution: 0.0095825195m/s^2
#Sensorvendor: KIONIX, name: KX023 Accelerometer, type: 1,version : 1, range 39.240005

# X value, Y value, Z value, time diff in ms
-0.043 -0.069 -0.16 9
-0.038 -0.062 -0.144 8
-0.081 -0.022 -0.178 8
-0.083 0.01 -0.186 9
-0.05 0.037 -0.169 8
0.001 0.061 -0.136 7
0.034 0.068 -0.076 10
0.042 0.062 -0.033 8
0.038 0.056 -0.03 9
0.047 0.047 -0.037 8
0.048 0.034 -0.026 9
0.012 0.026 0.051 8
-0.039 0.04 0.16 8
-0.061 0.052 0.265 9
-0.056 0.04 0.348 8
-0.05 0.036 0.313 9
-0.042 0.011 0.362 8
-0.035 -0.001 0.356 7
-0.009 -0.009 0.291 10
0.041 -0.031 0.181 8
0.095 -0.064 0.059 9
0.124 -0.092 -0.045 8
0.111 -0.083 -0.04 8
0.103 -0.086 -0.154 9
0.08 -0.079 -0.266 8
0.033 -0.079 -0.347 9
-0.036 -0.054 -0.373 8
-0.102 0.008 -0.319 8
-0.142 0.053 -0.187 9
-0.127 0.048 -0.169 6
-0.141 0.049 -0.023 10
-0.121 0.021 0.042 9
-0.061 -0.013 0.045 8
-0.001 -0.05 0.062 9
0.026 -0.085 0.1 8
0.025 -0.098 0.124 8
0.023 -0.088 0.112 9
-0.001 -0.08 0.14 8
-0.048 -0.065 0.161 9
-0.08 -0.049 0.15 8
-0.081 -0.015 0.093 8
-0.072 0.03 0.001 7
-0.05 0.057 -0.095 10
-0.045 0.051 -0.086 9
-0.003 0.052 -0.156 8
0.045 0.029 -0.168 8
0.087 0.006 -0.121 9
0.092 -0.016 -0.013 8
0.056 -0.033 0.111 9
0.015 -0.019 0.197 8
0.013 -0.017 0.177 8
-0.025 -0.007 0.218 9
-0.055 -0.012 0.197 8
-0.063 -0.011 0.123 7
-0.055 -0.021 0.013 10
-0.03 -0.047 -0.092 8
0.025 -0.081 -0.17 9
0.022 -0.073 -0.153 8
0.085 -0.094 -0.226 8
0.098 -0.103 -0.286 9
0.061 -0.113 -0.304 8
0.001 -0.122 -0.283 9
-0.051 -0.121 -0.251 8
-0.087 -0.115 -0.224 8
-0.078 -0.104 -0.202 9
-0.105 -0.104 -0.232 7
-0.098 -0.132 -0.271 10
-0.054 -0.192 -0.252 8
0.013 -0.242 -0.205 8
0.068 -0.32 -0.188 9
0.09 -0.431 -0.243 8
0.081 -0.388 -0.219 9
0.099 -0.466 -0.307 8
0.104 -0.531 -0.35 8
0.078 -0.613 -0.36 9
0.046 -0.671 -0.336 8
0.006 -0.683 -0.252 8
0.006 -0.615 -0.227 7
-0.037 -0.619 -0.165 10
-0.076 -0.639 -0.194 9
-0.118 -0.668 -0.233 8
-0.152 -0.712 -0.23 8
-0.172 -0.796 -0.184 9
-0.164 -0.955 -0.123 8
-0.148 -1.126 -0.096 9
-0.133 -1.013 -0.087 8
-0.072 -1.117 -0.107 8
-0.047 -1.2 -0.143 9
-0.069 -1.215 -0.168 8
-0.059 -1.245 -0.173 7
-0.011 -1.319 -0.176 10
-0.01 -1.187 -0.158 8
0.002 -1.236 -0.161 9
-0.004 -1.258 -0.14 8
-0.011 -1.224 -0.12 9
0.027 -1.164 -0.144 8
0.099 -1.086 -0.263 8
0.149 -1.003 -0.475 9
0.134 -0.903 -0.428 8
0.168 -0.84 -0.64 9
0.201 -0.807 -0.751 8
0.198 -0.79 -0.772 7
0.139 -0.737 -0.759 10
0.038 -0.64 -0.701 8
-0.036 -0.534 -0.576 8
-0.032 -0.481 -0.518 9
-0.126 -0.384 -0.354 8
-0.267 -0.266 -0.208 9
-0.339 -0.119 -0.108 8
-0.319 0.013 -0.062 8
-0.216 0.059 -0.035 9
-0.071 0.019 0.037 8
-0.064 0.017 0.034 9
0.044 -0.007 0.167 6
0.068 0.072 0.301 10
0.05 0.211 0.386 9
0.048 0.341 0.444 8
0.041 0.479 0.488 9
-0.004 0.699 0.488 8
-0.004 0.629 0.439 8
-0.121 0.984 0.385 9
-0.196 1.305 0.347 8
-0.254 1.439 0.369 9
-0.357 1.44 0.408 8
-0.394 1.399 0.415 8
-0.355 1.259 0.374 7
-0.326 1.25 0.427 10
-0.209 1.268 0.508 8
-0.05 1.318 0.431 9
0.065 1.401 0.224 8
0.159 1.451 0.13 9
0.247 1.481 0.183 8
0.256 1.593 0.343 8
0.23 1.434 0.308 9
0.169 1.577 0.587 8
0.103 1.659 0.805 9
0.064 1.777 0.891 8
0.062 1.961 0.978 7
0.061 2.129 1.155 10
-0.019 2.376 1.316 8
-0.017 2.138 1.184 9
-0.195 2.474 1.303 8
-0.333 2.809 1.378 8
-0.3 3.065 1.349 9
-0.157 3.241 1.172 8
-0.046 3.413 0.931 9
0.002 3.457 0.702 8
0.002 3.111 0.632 8
0.041 3.006 0.444 9
0.077 2.76 0.385 6
0.034 2.477 0.422 11
-0.088 2.213 0.538 8
-0.217 1.935 0.675 8
-0.321 1.586 0.652 9
-0.289 1.427 0.586 8
-0.33 1.035 0.389 8
-0.297 0.782 -0.006 9
-0.225 0.743 -0.633 8
-0.123 0.816 -1.318 9
-0.047 0.938 -1.929 8
-0.033 1.023 -2.186 8
-0.03 0.92 -1.967 7
0.024 0.857 -1.63 10
0.094 0.58 -0.773 9
0.093 0.162 0.362 8
-0.035 -0.167 1.538 8
-0.154 -0.509 2.528 9
-0.065 -0.973 3.049 8
-0.058 -0.876 2.744 9
0.056 -1.178 2.715 8
0.205 -1.377 2.39 8
0.423 -1.532 2.058 9
0.49 -1.616 1.67 8
0.441 -1.454 1.503 7
0.358 -1.524 0.927 10
0.214 -1.587 0.246 8
0.121 -1.855 -0.241 9
0.121 -2.31 -0.522 8
0.146 -2.757 -0.674 8
0.223 -3.075 -0.778 9
0.362 -3.209 -0.973 8
0.326 -2.888 -0.875 9
0.489 -2.875 -1.149 8
0.578 -2.714 -1.323 8
0.496 -2.463 -1.311 9
0.325 -2.158 -1.189 7
0.163 -1.815 -1.045 10
0.045 -1.528 -0.878 8
0.041 -1.375 -0.79 8
-0.021 -1.19 -0.555 9
-0.066 -1.055 -0.238 8
-0.106 -0.954 0.005 9
-0.133 -0.823 0.062 8
-0.153 -0.602 -0.084 8
-0.16 -0.329 -0.292 9
-0.144 -0.296 -0.263 8
-0.149 -0.079 -0.359 9
-0.156 0.052 -0.308 6
-0.117 0.106 -0.198 10
-0.029 0.141 -0.178 9
0.055 0.207 -0.256 8
0.128 0.291 -0.322 9
0.115 0.262 -0.29 8
0.167 0.353 -0.309 8
0.13 0.433 -0.218 9
0.025 0.495 -0.013 8
-0.059 0.55 0.193 8
-0.084 0.575 0.339 9
-0.059 0.515 0.42 8
-0.053 0.464 0.378 7
0.013 0.34 0.411 10
0.064 0.24 0.414 8
0.038 0.208 0.44 9
-0.04 0.192 0.541 8
-0.115 0.126 0.661 9
-0.148 -0.022 0.698 8
-0.133 -0.02 0.628 8
-0.134 -0.194 0.571 9
-0.123 -0.314 0.429 8
-0.127 -0.424 0.259 9
-0.14 -0.582 0.123 8
-0.152 -0.727 0.028 7
-0.139 -0.799 -0.135 10
-0.125 -0.719 -0.121 8
-0.084 -0.74 -0.407 9
-0.048 -0.716 -0.656 8
-0.03 -0.653 -0.804 8
-0.033 -0.554 -0.875 9
-0.058 -0.436 -0.833 8
-0.06 -0.343 -0.839 9
-0.054 -0.309 -0.755 8
0.023 -0.276 -0.722 8
0.188 -0.321 -0.562 9
0.329 -0.362 -0.435 6
0.366 -0.259 -0.332 11
0.337 -0.044 -0.287 8
0.282 0.143 -0.269 8
0.254 0.128 -0.242 9
0.202 0.226 -0.22 8
0.159 0.275 -0.167 9
0.106 0.301 -0.071 8
0.053 0.312 0.106 8
0.021 0.319 0.298 9
-0.029 0.345 0.405 8
-0.026 0.31 0.365 8
-0.079 0.363 0.375 7
-0.06 0.341 0.285 10
0.048 0.243 0.135 9
0.16 0.159 0.0 8
0.183 0.105 -0.057 8
0.096 0.091 -0.014 9
0.086 0.082 -0.013 8
-0.06 0.114 0.104 9
-0.205 0.16 0.229 8
-0.319 0.185 0.318 8
-0.374 0.204 0.318 9
-0.352 0.217 0.231 8
-0.317 0.195 0.208 7
-0.243 0.178 0.12 10
-0.152 0.103 0.093 8
-0.064 0.008 0.113 9
0.009 -0.055 0.121 8
0.068 -0.096 0.112 8
0.105 -0.131 0.115 9
0.108 -0.159 0.125 8
0.097 -0.143 0.112 9
0.08 -0.151 0.1 8
0.056 -0.161 0.051 8
0.025 -0.163 -0.019 9
-0.015 -0.117 -0.099 7
-0.057 -0.061 -0.191 10
-0.066 -0.035 -0.273 8
-0.059 -0.032 -0.246 8
-0.034 -0.047 -0.27 9
0.0 -0.069 -0.266 8
0.024 -0.057 -0.258 9
0.046 -0.04 -0.217 8
0.049 -0.022 -0.184 8
0.029 0.004 -0.15 9
0.026 0.004 -0.135 8
0.0 0.027 -0.102 9
-0.032 0.045 -0.081 6
-0.052 0.055 -0.043 10
-0.049 0.058 -0.006 9
-0.052 0.066 0.05 8
-0.063 0.08 0.097 9
-0.056 0.072 0.088 8
-0.075 0.093 0.066 8
-0.097 0.129 -0.036 9
-0.103 0.186 -0.16 8
-0.092 0.226 -0.233 8
-0.054 0.178 -0.224 9
-0.001 0.067 -0.119 8
-0.001 0.061 -0.107 7
0.045 -0.023 0.009 10
0.075 -0.052 0.057 8
0.073 -0.052 0.085 9
0.057 -0.049 0.157 8
0.045 -0.041 0.232 9
0.028 -0.023 0.255 8
0.025 -0.02 0.229 8
0.008 -0.005 0.208 9
-0.002 0.001 0.146 8
-0.003 0.004 0.052 9
0.008 0.004 -0.054 8
0.008 0.004 -0.049 7
0.04 0.001 -0.206 10
0.079 0.001 -0.185 8
0.121 -0.016 -0.204 9
0.14 -0.028 -0.177 8
0.109 -0.033 -0.117 8
0.049 -0.029 -0.047 9
0.008 -0.026 -0.021 8
0.007 -0.023 -0.019 9
-0.014 -0.019 -0.016 8
-0.042 0.006 0.011 8
-0.067 0.042 -0.002 9
-0.066 0.055 -0.059 6
-0.036 0.047 -0.108 10
-0.002 0.031 -0.144 9
-0.002 0.027 -0.129 8
0.022 0.007 -0.137 9
0.034 -0.009 -0.104 8
0.018 -0.011 -0.031 8
-0.021 0.001 0.021 9
-0.048 0.007 0.008 8
-0.031 -0.01 -0.024 9
-0.028 -0.009 -0.022 8
0.016 -0.037 -0.06 8
0.05 -0.045 -0.096 7
0.046 -0.032 -0.088 10
0.003 0.004 -0.028 9
-0.049 0.054 0.032 8
-0.071 0.084 0.036 8
-0.064 0.076 0.032 9
-0.056 0.064 0.0 8
-0.038 0.023 -0.043 9
-0.014 -0.011 -0.087 8
-0.013 -0.024 -0.105 8
-0.033 -0.021 -0.083 9
-0.046 -0.023 -0.043 8
-0.041 -0.021 -0.039 7
-0.033 -0.023 -0.036 10
-0.021 -0.02 -0.073 8
-0.026 -0.002 -0.124 9
-0.038 0.01 -0.153 8
-0.037 0.004 -0.147 8
-0.019 -0.01 -0.124 9
-0.017 -0.009 -0.111 8
-0.006 -0.023 -0.104 9
-0.018 -0.008 -0.11 8
-0.051 0.062 -0.105 8
-0.08 0.149 -0.072 9
-0.084 0.152 0.012 6
-0.064 0.087 0.139 11
-0.057 0.078 0.125 8
-0.021 0.026 0.236 8
0.019 -0.01 0.298 9
0.037 -0.042 0.329 8
0.03 -0.064 0.332 9
0.015 -0.068 0.277 8
0.0 -0.049 0.135 8
0.0 -0.044 0.121 9
0.002 -0.006 -0.046 8
0.024 0.018 -0.161 9
0.038 0.03 -0.213 6
0.023 0.047 -0.212 10
-0.01 0.062 -0.175 9
-0.032 0.057 -0.133 8
-0.029 0.051 -0.12 8
-0.029 0.029 -0.09 9
-0.037 0.012 -0.08 8
-0.05 0.014 -0.084 9
-0.056 0.038 -0.091 8
-0.064 0.074 -0.089 8
-0.063 0.105 -0.072 9
-0.057 0.095 -0.064 8
-0.026 0.079 -0.024 7
0.025 0.012 0.028 10
0.071 -0.05 0.07 8
0.087 -0.084 0.094 9
0.079 -0.097 0.093 8
0.062 -0.099 0.071 9
0.056 -0.089 0.064 8
0.031 -0.076 0.023 8
0.006 -0.049 -0.027 9
-0.016 -0.018 -0.074 8
-0.037 0.013 -0.097 8
-0.043 0.03 -0.098 9
-0.039 0.027 -0.089 7
-0.025 0.018 -0.073 10
-0.006 -0.004 -0.033 8
-0.002 -0.02 0.007 8
0.01 -0.031 0.016 9
0.044 -0.04 -0.003 8
0.069 -0.048 -0.027 9
0.058 -0.045 -0.037 8
0.052 -0.04 -0.033 8
0.026 -0.029 -0.037 9
0.008 -0.016 -0.04 8
-0.003 -0.004 -0.038 9
-0.023 -0.001 -0.019 6
-0.037 -0.006 0.001 10
-0.041 -0.011 0.0 9
-0.037 -0.01 0.0 8
-0.029 -0.02 -0.028 9
-0.012 -0.032 -0.057 8
-0.007 -0.037 -0.08 8
-0.014 -0.023 -0.093 9
-0.018 0.008 -0.086 8
-0.016 0.045 -0.071 9
-0.015 0.04 -0.064 8
-0.003 0.063 -0.038 8
0.014 0.067 0.003 7
0.03 0.054 0.041 10
0.034 0.033 0.087 8
0.024 0.021 0.126 9
0.01 0.015 0.119 8
0.009 0.014 0.107 9
0.0 0.02 0.055 8
-0.008 0.023 0.0 8
-0.008 0.013 -0.042 9
-0.006 -0.001 -0.077 8
-0.005 -0.024 -0.104 9
-0.017 -0.043 -0.115 8
-0.015 -0.038 -0.104 7
-0.044 -0.042 -0.098 10
-0.06 -0.037 -0.069 8
-0.037 -0.038 -0.052 9
0.004 -0.038 -0.068 8
0.065 -0.051 -0.051 8
0.079 -0.051 0.041 9
0.071 -0.046 0.037 8
0.002 0.071 0.153 9
-0.044 0.231 0.241 8
-0.031 0.283 0.278 8
0.022 0.275 0.254 9
0.074 0.289 0.193 6
0.079 0.335 0.147 11
0.071 0.301 0.133 8
0.041 0.334 0.135 8
0.013 0.323 0.136 9
0.013 0.298 0.064 8
0.042 0.263 -0.045 8
0.076 0.206 -0.184 9
0.078 0.155 -0.299 8
# end
#Thu Feb 26 20:21:30 GMT+08:00 2015
