# Supplementary material for: Abnormal Gait Behavior Detection for Elderly Based on Enhanced Wigner-Ville Analysis and Cloud Incremental SVM Learning
Source: Hindawi journal article supplement (doi:10.1155/2016/5869238), 2016-01-01
Supplement: f1 [file 5869238.f1.zip › Supplementary Materials/Original Data/Squatting/original__29.txt]

# Accelerometer Values
# filename:  original__29.txt
# Saving start time: Thu Feb 26 20:21:40 GMT+08:00 2015

# sensor resolution: 0.0095825195m/s^2
#Sensorvendor: KIONIX, name: KX023 Accelerometer, type: 1,version : 1, range 39.240005

# X value, Y value, Z value, time diff in ms
-0.035 0.005 -0.364 8
-0.041 0.034 -0.335 8
-0.031 0.047 -0.288 9
-0.024 0.055 -0.212 8
-0.015 0.048 -0.125 9
0.0 0.029 -0.028 8
0.009 0.005 0.074 8
0.008 0.004 0.066 7
0.012 -0.025 0.147 10
0.005 -0.06 0.191 9
-0.021 -0.067 0.212 8
-0.048 -0.05 0.2 8
-0.058 -0.019 0.152 9
-0.048 -0.013 0.112 8
-0.043 -0.011 0.101 9
-0.041 -0.009 0.091 8
-0.054 0.019 0.098 8
-0.046 0.028 0.077 9
-0.02 0.0 0.04 8
-0.014 -0.029 0.03 7
-0.026 -0.011 0.045 10
-0.024 -0.01 0.041 8
-0.022 0.01 0.054 9
-0.011 0.005 0.042 8
-0.016 0.023 0.038 8
-0.03 0.048 0.048 9
-0.025 0.039 -0.002 8
0.019 0.017 -0.131 9
0.017 0.016 -0.118 8
0.066 -0.013 -0.235 8
0.077 -0.028 -0.286 9
0.049 0.0 -0.273 7
-0.008 0.05 -0.202 10
-0.066 0.101 -0.125 8
-0.089 0.116 -0.082 8
-0.08 0.105 -0.074 9
-0.076 0.093 -0.072 8
-0.063 0.089 -0.057 9
-0.035 0.07 0.029 8
-0.001 0.044 0.161 8
0.026 0.022 0.3 9
0.051 -0.01 0.436 8
0.046 -0.009 0.392 8
0.063 -0.036 0.491 7
0.059 -0.046 0.522 10
0.046 -0.05 0.474 9
0.033 -0.041 0.353 8
0.009 -0.018 0.192 8
-0.009 -0.004 0.026 9
-0.008 -0.004 0.023 8
-0.005 -0.026 -0.113 9
0.008 -0.074 -0.216 8
0.014 -0.113 -0.296 8
0.016 -0.146 -0.358 9
0.023 -0.184 -0.402 8
0.02 -0.165 -0.362 7
0.024 -0.185 -0.388 10
0.012 -0.169 -0.385 8
-0.018 -0.127 -0.364 9
-0.048 -0.09 -0.325 8
-0.065 -0.08 -0.264 9
-0.058 -0.095 -0.187 8
-0.052 -0.086 -0.169 8
-0.037 -0.118 -0.152 9
-0.02 -0.156 -0.06 8
-0.001 -0.182 -0.067 8
0.015 -0.189 -0.098 9
0.026 -0.192 -0.105 7
0.018 -0.195 -0.101 10
0.016 -0.175 -0.091 8
-0.014 -0.173 -0.074 9
-0.057 -0.163 -0.053 8
-0.085 -0.154 -0.033 8
-0.082 -0.162 0.0 9
-0.052 -0.198 0.092 8
-0.015 -0.274 0.216 8
-0.014 -0.246 0.195 9
0.014 -0.348 0.281 8
0.042 -0.449 0.32 9
0.069 -0.57 0.285 6
0.085 -0.684 0.179 10
0.1 -0.771 0.074 9
0.104 -0.843 -0.057 8
0.094 -0.759 -0.051 9
0.07 -0.837 -0.186 8
0.028 -0.949 -0.242 8
-0.024 -1.096 -0.246 9
-0.054 -1.232 -0.222 8
-0.06 -1.332 -0.168 9
-0.034 -1.457 -0.068 8
-0.03 -1.311 -0.062 8
0.017 -1.515 -0.025 7
0.064 -1.675 -0.084 10
0.094 -1.723 -0.134 9
0.103 -1.761 -0.154 8
0.103 -1.825 -0.157 8
0.061 -1.775 -0.17 9
0.055 -1.597 -0.153 8
-0.035 -1.44 -0.212 8
-0.121 -1.29 -0.296 9
-0.089 -1.219 -0.485 8
-0.042 -1.125 -0.815 9
-0.063 -0.97 -1.113 8
-0.057 -0.873 -1.001 7
-0.077 -0.714 -1.153 10
-0.098 -0.571 -1.163 8
-0.093 -0.477 -1.117 9
-0.049 -0.405 -1.089 8
-0.019 -0.315 -1.048 8
0.066 -0.245 -0.907 9
0.125 -0.144 -0.757 8
0.112 -0.129 -0.682 9
0.06 0.102 -0.538 8
0.013 0.452 -0.326 8
-0.003 0.791 -0.127 9
0.049 1.047 0.035 6
0.099 1.281 0.157 11
0.062 1.478 0.222 8
0.056 1.33 0.2 8
-0.035 1.465 0.204 9
-0.12 1.53 0.183 8
-0.153 1.598 0.288 8
-0.175 1.735 0.56 9
-0.191 1.896 0.798 8
-0.145 2.03 0.867 9
-0.131 1.827 0.78 8
-0.085 1.93 0.753 8
-0.098 1.946 0.697 7
-0.137 1.912 0.635 10
-0.244 1.838 0.578 9
-0.351 1.725 0.705 8
-0.363 1.645 1.061 8
-0.327 1.481 0.955 9
-0.276 1.405 1.315 8
-0.186 1.333 1.403 9
-0.081 1.34 1.136 8
0.035 1.386 0.619 8
0.142 1.473 0.099 9
0.253 1.541 -0.232 8
0.228 1.386 -0.208 7
0.483 1.462 -0.347 10
0.717 1.616 -0.361 8
0.729 1.77 -0.247 9
0.563 1.813 0.085 8
0.296 1.792 0.509 9
0.094 1.81 0.864 8
0.085 1.629 0.777 8
0.007 1.725 1.079 9
0.045 1.788 1.319 8
0.131 1.74 1.418 8
0.211 1.603 1.317 9
0.274 1.407 0.947 7
0.35 1.17 0.294 10
0.315 1.053 0.264 8
0.374 0.804 -0.448 8
0.346 0.585 -1.063 9
0.249 0.474 -1.474 8
0.131 0.475 -1.643 9
0.065 0.505 -1.627 8
0.063 0.512 -1.455 8
0.057 0.461 -1.31 9
0.041 0.467 -1.004 8
-0.02 0.489 -0.572 9
-0.1 0.541 -0.154 6
-0.168 0.598 0.194 10
-0.192 0.649 0.453 9
-0.176 0.668 0.634 8
-0.158 0.601 0.571 9
-0.108 0.572 0.667 8
-0.015 0.522 0.609 8
0.109 0.456 0.471 9
0.254 0.338 0.291 8
0.295 0.25 0.164 8
0.337 0.125 0.295 9
0.303 0.113 0.266 8
0.411 -0.138 0.535 7
0.454 -0.387 0.764 10
0.468 -0.597 0.998 8
0.438 -0.884 1.211 9
0.306 -1.214 1.404 8
0.014 -1.534 1.642 9
0.012 -1.381 1.478 8
-0.284 -1.71 1.689 8
-0.456 -1.885 1.706 9
-0.531 -1.96 1.411 8
-0.524 -2.044 0.902 9
-0.445 -2.102 0.327 8
-0.4 -1.892 0.294 7
-0.313 -1.911 -0.263 10
-0.308 -1.827 -0.789 8
-0.319 -1.701 -1.153 9
-0.265 -1.747 -1.162 8
-0.184 -1.921 -0.958 8
-0.121 -1.944 -0.708 9
-0.101 -1.71 -0.481 8
-0.091 -1.539 -0.433 9
-0.072 -1.171 -0.32 8
0.02 -0.837 -0.348 8
0.206 -0.623 -0.41 9
0.409 -0.48 -0.409 6
0.55 -0.344 -0.284 10
0.596 -0.176 -0.091 9
0.537 -0.159 -0.082 8
0.518 0.0 0.076 9
0.454 0.094 0.222 8
0.374 0.142 0.314 8
0.308 0.175 0.284 9
0.245 0.203 0.178 8
0.164 0.246 0.066 9
0.147 0.221 0.06 8
0.043 0.255 -0.022 8
-0.057 0.27 -0.088 7
-0.164 0.294 -0.188 10
-0.307 0.327 -0.289 9
-0.436 0.351 -0.291 8
-0.511 0.345 -0.227 8
-0.46 0.31 -0.204 9
-0.468 0.288 -0.108 8
-0.392 0.23 0.057 9
-0.278 0.104 0.28 8
-0.137 -0.053 0.485 8
-0.009 -0.191 0.581 9
-0.008 -0.172 0.566 8
0.029 -0.246 0.509 7
0.009 -0.281 0.383 10
-0.003 -0.333 0.201 8
-0.007 -0.39 0.073 9
0.021 -0.434 0.035 8
0.072 -0.476 0.034 8
0.064 -0.428 0.031 9
0.127 -0.495 0.0 8
0.192 -0.574 -0.084 9
0.203 -0.613 -0.242 8
0.173 -0.582 -0.473 8
0.16 -0.531 -0.702 9
0.144 -0.478 -0.632 7
0.165 -0.477 -0.774 10
0.214 -0.471 -0.794 8
0.258 -0.401 -0.755 8
0.222 -0.266 -0.639 9
0.109 -0.115 -0.45 8
-0.022 0.01 -0.297 9
-0.161 0.108 -0.191 8
-0.145 0.097 -0.172 8
-0.251 0.177 -0.05 9
-0.307 0.248 0.083 8
-0.336 0.332 0.17 9
-0.332 0.388 0.266 6
-0.283 0.445 0.305 10
-0.193 0.533 0.19 9
-0.174 0.48 0.171 8
-0.075 0.495 0.107 8
0.012 0.402 0.172 9
0.068 0.286 0.243 8
0.092 0.195 0.272 9
0.091 0.11 0.282 8
0.04 0.039 0.294 8
0.036 0.035 0.264 9
-0.068 0.011 0.279 8
-0.182 0.036 0.278 7
-0.252 0.05 0.25 10
-0.261 0.009 0.203 8
-0.225 -0.052 0.135 9
-0.166 -0.094 0.042 8
-0.149 -0.084 0.038 9
-0.083 -0.113 -0.057 8
-0.033 -0.137 -0.153 8
-0.008 -0.153 -0.221 9
-0.001 -0.176 -0.248 8
-0.022 -0.198 -0.262 9
-0.062 -0.204 -0.269 8
-0.056 -0.183 -0.242 7
-0.079 -0.189 -0.215 10
-0.088 -0.195 -0.169 8
-0.109 -0.168 -0.173 9
-0.142 -0.086 -0.213 8
-0.166 0.027 -0.26 8
-0.157 0.099 -0.279 9
-0.141 0.089 -0.251 8
-0.102 0.056 -0.222 8
-0.057 -0.024 -0.172 9
-0.033 -0.06 -0.15 8
-0.027 -0.042 -0.144 9
-0.026 -0.013 -0.115 6
-0.03 0.007 -0.072 10
-0.027 0.006 -0.065 9
-0.033 0.046 -0.045 8
-0.039 0.109 -0.056 9
-0.056 0.178 -0.06 8
-0.071 0.211 -0.009 8
-0.056 0.168 0.077 9
-0.009 0.081 0.132 8
-0.008 0.073 0.119 9
0.038 0.004 0.134 8
0.062 -0.038 0.144 8
0.056 -0.053 0.146 7
0.028 -0.037 0.146 10
0.0 -0.027 0.13 9
-0.025 -0.017 0.087 8
-0.022 -0.015 0.078 8
-0.056 0.027 0.042 9
-0.092 0.077 0.047 8
-0.101 0.072 0.07 9
-0.067 0.008 0.057 8
-0.013 -0.066 -0.007 8
0.022 -0.112 -0.078 9
0.02 -0.101 -0.07 8
0.032 -0.095 -0.103 7
0.037 -0.058 -0.058 10
0.033 -0.042 0.055 8
0.021 -0.036 0.146 9
0.006 0.013 0.139 8
-0.008 0.11 0.044 8
-0.007 0.099 0.04 9
-0.009 0.174 -0.076 8
0.002 0.185 -0.155 9
0.019 0.152 -0.182 8
0.028 0.11 -0.181 8
0.025 0.092 -0.141 9
0.022 0.082 -0.126 6
0.008 0.07 -0.048 11
-0.011 0.033 0.024 8
-0.016 -0.01 0.044 8
0.002 -0.036 0.031 9
0.026 -0.062 0.063 8
0.039 -0.087 0.12 9
0.035 -0.078 0.108 8
0.038 -0.072 0.115 8
0.033 -0.048 0.088 9
0.024 -0.039 0.077 8
0.014 -0.047 0.057 8
0.005 -0.036 0.014 7
-0.002 -0.005 -0.032 10
-0.002 -0.005 -0.029 9
-0.015 0.013 -0.067 8
-0.023 0.027 -0.085 8
-0.015 0.006 -0.098 9
0.005 -0.062 -0.084 8
0.022 -0.118 -0.045 9
0.037 -0.141 -0.013 8
0.033 -0.126 -0.012 8
0.036 -0.141 -0.001 9
0.021 -0.138 -0.015 8
0.0 -0.114 -0.052 7
0.0 -0.092 -0.071 10
0.002 -0.083 -0.066 8
-0.006 -0.067 -0.07 9
-0.005 -0.061 -0.063 8
-0.009 -0.025 -0.084 9
-0.011 0.024 -0.112 8
-0.015 0.089 -0.114 8
-0.015 0.131 -0.088 9
-0.002 0.117 -0.02 8
0.003 0.084 0.059 8
0.003 0.076 0.053 9
-0.007 0.057 0.135 7
-0.026 0.058 0.227 10
-0.025 0.065 0.286 8
0.013 0.037 0.268 9
0.083 -0.017 0.191 8
0.157 -0.044 0.142 8
0.142 -0.039 0.128 9
0.18 -0.041 0.112 8
0.15 -0.03 0.08 8
0.082 0.0 0.049 9
0.013 0.05 0.038 8
-0.049 0.115 0.066 9
-0.044 0.103 0.059 6
-0.089 0.138 0.095 10
-0.119 0.152 0.111 9
-0.129 0.146 0.101 8
-0.107 0.09 0.081 9
-0.06 0.011 0.074 8
0.001 -0.069 0.056 8
0.05 -0.12 0.027 9
0.045 -0.108 0.024 8
0.057 -0.126 0.004 9
0.041 -0.128 -0.005 8
0.019 -0.122 -0.007 8
0.005 -0.111 -0.007 7
0.0 -0.086 -0.014 10
0.002 -0.023 0.014 8
0.002 -0.021 0.012 9
0.026 0.064 -0.09 8
0.083 0.084 -0.202 9
0.126 0.013 -0.107 8
0.094 -0.033 0.042 9
0.001 0.014 0.151 8
-0.098 0.12 0.175 8
-0.088 0.108 0.157 9
-0.148 0.204 0.116 8
-0.135 0.23 0.053 7
-0.072 0.179 0.011 10
-0.003 0.1 0.007 8
0.034 0.018 0.022 9
0.042 -0.044 0.022 8
0.038 -0.04 0.02 8
0.043 -0.08 -0.016 9
0.05 -0.128 -0.082 8
0.049 -0.173 -0.161 9
0.031 -0.197 -0.206 8
-0.008 -0.181 -0.205 8
-0.066 -0.102 -0.209 9
-0.059 -0.092 -0.188 6
-0.111 0.039 -0.212 11
-0.142 0.152 -0.196 8
-0.139 0.192 -0.097 8
-0.098 0.14 0.065 9
-0.041 0.029 0.205 8
0.003 -0.055 0.281 8
0.003 -0.049 0.253 9
0.018 -0.083 0.285 8
0.007 -0.084 0.278 9
-0.006 -0.077 0.235 8
-0.012 -0.048 0.131 8
-0.011 -0.043 0.117 7
-0.012 0.012 -0.206 10
-0.011 0.011 -0.185 9
-0.017 0.063 -0.295 8
-0.034 0.113 -0.329 8
-0.033 0.117 -0.284 9
-0.009 0.063 -0.22 8
0.022 0.0 -0.152 9
0.019 0.0 -0.136 8
0.038 -0.038 -0.033 8
0.033 -0.053 0.079 9
0.014 -0.029 0.147 8
-0.002 0.008 0.167 7
-0.015 0.035 0.156 10
-0.021 0.056 0.133 8
-0.019 0.05 0.119 9
-0.016 0.066 0.097 8
-0.001 0.058 0.083 9
0.017 0.027 0.07 8
0.036 -0.013 0.048 8
0.05 -0.053 0.031 9
0.058 -0.07 -0.002 8
0.052 -0.063 -0.002 8
0.049 -0.056 -0.061 9
0.043 -0.041 -0.074 7
0.036 -0.04 -0.023 10
0.012 -0.027 0.011 8
-0.017 0.023 0.002 8
-0.042 0.068 -0.016 9
-0.038 0.061 -0.015 8
-0.054 0.075 -0.026 9
-0.053 0.072 -0.023 8
-0.036 0.051 -0.019 8
-0.017 0.033 -0.034 9
0.0 0.022 -0.069 8
0.025 -0.015 -0.073 9
0.022 -0.013 -0.066 6
0.043 -0.072 -0.042 10
0.043 -0.121 -0.016 9
0.041 -0.148 -0.029 8
0.048 -0.16 -0.089 9
0.06 -0.17 -0.145 8
0.06 -0.174 -0.19 8
0.054 -0.157 -0.171 9
0.045 -0.145 -0.219 8
0.036 -0.123 -0.272 8
0.025 -0.09 -0.309 9
0.003 -0.024 -0.294 8
-0.025 0.056 -0.227 7
-0.054 0.126 -0.137 10
-0.048 0.113 -0.124 8
-0.058 0.144 -0.061 9
-0.049 0.131 -0.062 8
-0.034 0.11 -0.143 9
0.002 0.09 -0.299 8
0.033 0.059 -0.418 8
0.026 0.03 -0.369 9
0.024 0.027 -0.332 8
-0.024 0.056 -0.079 9
-0.11 0.117 0.248 8
-0.177 0.147 0.465 7
-0.194 0.16 0.544 10
-0.165 0.162 0.532 8
-0.1 0.111 0.451 9
-0.09 0.1 0.406 8
-0.006 -0.013 0.297 8
0.074 -0.123 0.235 9
0.135 -0.175 0.218 8
0.168 -0.191 0.195 9
0.174 -0.182 0.191 8
0.153 -0.157 0.208 8
0.138 -0.141 0.187 9
0.106 -0.128 0.189 6
0.083 -0.13 0.153 10
0.074 -0.126 0.117 9
0.057 -0.107 0.112 8
0.025 -0.085 0.12 9
0.022 -0.077 0.108 8
-0.004 -0.065 0.118 8
-0.023 -0.066 0.11 9
-0.036 -0.06 0.059 8
-0.058 -0.036 -0.046 9
-0.087 0.022 -0.185 8
-0.112 0.087 -0.247 8
-0.101 0.079 -0.222 7
-0.11 0.096 -0.185 10
-0.116 0.087 -0.131 9
-0.136 0.104 -0.062 8
-0.163 0.158 0.0 8
-0.171 0.226 0.0 9
-0.167 0.273 -0.052 8
-0.15 0.245 -0.047 9
-0.127 0.256 -0.074 8
-0.08 0.235 -0.037 8
-0.037 0.207 0.057 9
-0.012 0.187 0.151 8
0.012 0.157 0.196 7
0.042 0.094 0.198 10
0.038 0.084 0.178 8
0.052 0.007 0.158 9
0.048 -0.059 0.116 8
0.03 -0.102 0.054 8
0.008 -0.115 0.001 9
-0.001 -0.105 -0.03 8
0.005 -0.111 -0.082 9
0.004 -0.1 -0.074 8
0.014 -0.109 -0.15 8
0.009 -0.084 -0.215 9
-0.01 -0.03 -0.253 7
-0.031 0.004 -0.265 10
-0.034 0.013 -0.246 8
-0.023 0.0 -0.178 8
-0.021 0.0 -0.16 9
-0.02 -0.025 -0.082 8
-0.027 -0.021 -0.042 9
-0.022 -0.008 -0.038 8
-0.004 -0.025 -0.062 8
0.021 -0.076 -0.081 9
0.044 -0.138 -0.059 8
0.039 -0.124 -0.053 9
0.055 -0.166 0.01 6
0.071 -0.183 0.084 10
0.084 -0.178 0.113 9
0.08 -0.16 0.103 8
0.049 -0.111 0.077 8
-0.003 -0.034 0.048 9
-0.003 -0.031 0.044 8
-0.051 0.016 0.039 9
-0.077 0.017 0.017 8
-0.063 -0.001 -0.049 8
-0.022 -0.02 -0.115 9
0.013 -0.022 -0.134 8
0.011 -0.02 -0.121 7
0.027 0.0 -0.088 10
0.021 0.042 -0.03 8
0.003 0.091 0.048 9
-0.014 0.125 0.143 8
-0.022 0.14 0.231 9
-0.019 0.14 0.27 8
-0.011 0.121 0.266 8
-0.01 0.109 0.239 9
-0.019 0.093 0.216 8
-0.037 0.088 0.172 9
-0.055 0.1 0.125 8
-0.058 0.103 0.065 7
-0.036 0.069 -0.009 10
-0.032 0.062 -0.008 8
-0.005 0.015 -0.058 9
0.012 -0.027 -0.046 8
0.022 -0.064 0.023 8
0.028 -0.101 0.095 9
0.03 -0.117 0.139 8
0.022 -0.098 0.165 8
0.02 -0.088 0.149 9
0.013 -0.048 0.155 8
0.004 -0.004 0.142 9
-0.001 0.042 0.106 6
0.008 0.051 0.052 10
0.027 0.004 -0.044 9
0.037 -0.057 -0.157 8
0.033 -0.051 -0.141 9
0.023 -0.111 -0.111 8
-0.011 -0.128 0.0 8
-0.053 -0.091 0.055 9
-0.067 -0.053 0.076 8
-0.06 -0.025 0.077 9
-0.032 0.023 0.081 8
-0.029 0.021 0.073 8
0.012 0.053 0.099 7
0.052 0.034 0.124 10
0.078 -0.02 0.123 9
0.093 -0.068 0.099 8
0.093 -0.076 0.054 8
0.078 -0.048 -0.019 9
0.07 -0.043 -0.017 8
0.041 0.023 -0.11 8
0.007 0.118 -0.175 9
-0.018 0.187 -0.158 8
# end
#Thu Feb 26 20:21:45 GMT+08:00 2015.
