# Supplementary material for: Abnormal Gait Behavior Detection for Elderly Based on Enhanced Wigner-Ville Analysis and Cloud Incremental SVM Learning
Source: Hindawi journal article supplement (doi:10.1155/2016/5869238), 2016-01-01
Supplement: f1 [file 5869238.f1.zip › Supplementary Materials/Original Data/Squatting/original__30.txt]

# Accelerometer Values
# filename:  original__30.txt
# Saving start time: Thu Feb 26 20:21:48 GMT+08:00 2015

# sensor resolution: 0.0095825195m/s^2
#Sensorvendor: KIONIX, name: KX023 Accelerometer, type: 1,version : 1, range 39.240005

# X value, Y value, Z value, time diff in ms
-0.013 0.012 -0.306 8
-0.015 0.021 -0.312 8
-0.021 0.039 -0.272 9
0.003 0.055 -0.201 8
0.003 0.05 -0.181 7
0.063 0.04 -0.112 10
0.141 0.001 -0.046 8
0.206 -0.075 0.045 9
0.226 -0.17 0.12 8
0.195 -0.217 0.107 9
0.134 -0.198 0.011 8
0.121 -0.178 0.01 8
0.064 -0.121 -0.084 9
0.012 -0.07 -0.128 8
-0.027 -0.028 -0.186 8
-0.029 0.0 -0.271 9
0.01 -0.03 -0.315 7
0.054 -0.096 -0.304 10
0.049 -0.086 -0.274 8
0.077 -0.101 -0.211 8
0.082 -0.085 -0.074 9
0.074 -0.088 0.082 8
0.075 -0.086 0.162 9
0.076 -0.059 0.164 8
0.055 -0.032 0.152 8
0.049 -0.029 0.137 9
0.024 -0.024 0.132 8
0.016 -0.032 0.129 9
0.02 -0.046 0.136 6
0.019 -0.057 0.162 10
0.016 -0.049 0.179 9
0.013 -0.028 0.137 8
0.012 -0.025 0.124 9
0.032 -0.015 -0.007 8
0.061 -0.015 -0.184 8
0.068 -0.017 -0.325 9
0.053 -0.008 -0.387 8
0.037 0.014 -0.348 8
0.03 0.047 -0.214 9
0.027 0.042 -0.192 8
0.018 0.068 0.007 7
0.0 0.075 0.175 10
-0.014 0.093 0.244 8
-0.012 0.103 0.235 9
0.006 0.07 0.165 8
0.019 0.031 0.057 9
0.017 0.028 0.051 8
0.009 -0.007 -0.077 8
-0.001 -0.034 -0.181 9
-0.007 -0.014 -0.228 8
-0.016 0.005 -0.224 9
-0.022 0.014 -0.165 8
-0.02 0.012 -0.149 7
-0.025 0.038 -0.049 10
-0.035 0.052 0.08 8
-0.047 0.056 0.199 9
-0.045 0.058 0.269 8
-0.006 0.02 0.285 8
0.056 -0.046 0.265 9
0.101 -0.097 0.234 8
0.091 -0.088 0.211 9
0.089 -0.098 0.154 8
0.054 -0.056 0.048 8
0.02 0.007 -0.066 9
0.004 0.028 -0.144 6
0.009 0.0 -0.197 10
0.014 -0.016 -0.221 9
0.013 -0.014 -0.199 8
0.009 0.005 -0.217 9
0.021 0.019 -0.218 8
0.052 -0.014 -0.147 8
0.087 -0.068 -0.038 9
0.104 -0.092 0.044 8
0.1 -0.073 0.085 9
0.09 -0.066 0.076 8
0.069 -0.043 0.075 8
0.031 -0.015 0.053 7
-0.019 0.032 0.047 10
-0.061 0.071 0.06 9
-0.067 0.087 0.053 8
-0.033 0.069 0.021 8
-0.03 0.062 0.019 9
0.009 0.015 -0.013 8
0.026 -0.039 -0.022 9
0.011 -0.058 -0.007 8
-0.027 -0.027 0.035 8
-0.057 0.004 0.115 9
-0.051 0.021 0.184 8
-0.046 0.019 0.165 7
-0.09 0.046 0.197 10
-0.096 0.089 0.192 8
-0.081 0.099 0.161 9
-0.042 0.046 0.123 8
0.002 -0.013 0.083 8
0.002 -0.011 0.074 9
0.023 -0.032 0.038 8
0.007 -0.01 0.026 9
-0.022 0.019 0.03 8
-0.036 0.025 0.044 8
-0.036 0.025 0.039 9
-0.032 0.023 0.035 7
-0.027 0.048 -0.01 10
-0.009 0.052 -0.065 8
0.03 0.002 -0.097 8
0.072 -0.052 -0.096 9
0.067 -0.074 -0.073 8
0.021 -0.047 -0.029 9
-0.009 -0.02 0.023 8
-0.008 -0.018 0.021 8
-0.006 -0.022 0.073 9
0.0 -0.022 0.108 8
-0.003 0.006 0.106 9
-0.009 0.048 0.058 6
-0.003 0.049 -0.011 10
0.008 0.011 -0.092 9
0.007 0.009 -0.083 8
0.01 -0.014 -0.153 9
0.0 -0.007 -0.173 8
-0.021 -0.003 -0.141 8
-0.042 -0.026 -0.081 9
-0.052 -0.046 -0.026 8
-0.057 -0.046 -0.007 8
-0.051 -0.042 -0.007 9
-0.056 -0.022 -0.01 8
-0.054 -0.002 -0.043 7
-0.047 0.001 -0.103 10
-0.04 -0.006 -0.136 8
-0.036 -0.041 -0.132 9
-0.039 -0.077 -0.145 8
-0.035 -0.069 -0.131 9
-0.044 -0.071 -0.178 8
-0.062 -0.059 -0.211 8
-0.074 -0.073 -0.208 9
-0.079 -0.097 -0.171 8
-0.084 -0.114 -0.114 9
-0.066 -0.135 -0.058 8
-0.059 -0.121 -0.052 7
-0.013 -0.152 -0.002 10
0.029 -0.201 -0.003 8
0.053 -0.255 -0.082 9
0.063 -0.27 -0.147 8
0.056 -0.259 -0.139 8
0.043 -0.279 -0.142 9
0.039 -0.251 -0.128 8
0.051 -0.255 -0.154 9
0.077 -0.235 -0.169 8
0.089 -0.284 -0.197 8
0.08 -0.372 -0.258 9
0.056 -0.441 -0.369 6
0.033 -0.469 -0.468 10
0.029 -0.422 -0.421 9
0.018 -0.446 -0.46 8
0.013 -0.497 -0.452 9
0.008 -0.558 -0.42 8
-0.006 -0.6 -0.375 8
-0.028 -0.629 -0.266 9
-0.059 -0.655 -0.084 8
-0.053 -0.59 -0.076 9
-0.09 -0.614 0.035 8
-0.096 -0.65 -0.017 8
-0.059 -0.75 -0.136 7
-0.009 -0.939 -0.212 10
0.037 -1.108 -0.261 9
0.051 -1.175 -0.353 8
0.045 -1.057 -0.317 8
0.025 -1.14 -0.412 9
-0.005 -1.206 -0.379 8
-0.005 -1.295 -0.238 9
0.004 -1.395 -0.059 8
-0.01 -1.415 0.126 8
-0.005 -1.386 0.23 9
-0.005 -1.247 0.207 8
0.012 -1.191 0.132 7
0.024 -1.112 -0.084 10
0.082 -1.035 -0.415 8
0.162 -0.965 -0.775 9
0.188 -0.895 -1.045 8
0.181 -0.82 -1.185 8
0.162 -0.738 -1.067 9
0.118 -0.653 -1.031 8
0.024 -0.564 -0.873 9
-0.093 -0.465 -0.694 8
-0.178 -0.305 -0.446 8
-0.181 -0.117 -0.134 9
-0.163 -0.105 -0.121 7
-0.107 -0.017 0.058 10
-0.031 -0.004 0.03 8
0.035 0.02 -0.103 8
0.066 0.067 -0.18 9
0.041 0.137 -0.154 8
0.002 0.216 -0.037 9
0.002 0.194 -0.033 8
-0.018 0.299 0.129 8
-0.041 0.42 0.247 9
-0.068 0.503 0.272 8
-0.096 0.562 0.193 8
-0.121 0.637 0.092 7
-0.145 0.73 0.044 10
-0.13 0.657 0.039 9
-0.138 0.772 0.038 8
-0.109 0.91 0.047 8
-0.11 1.046 0.041 9
-0.141 1.165 0.042 8
-0.179 1.342 -0.014 9
-0.218 1.597 -0.153 8
-0.197 1.437 -0.137 8
-0.216 1.685 -0.239 9
-0.21 1.865 -0.213 8
-0.136 1.995 -0.049 7
0.024 2.062 0.208 10
0.237 2.15 0.611 8
0.398 2.318 1.185 9
0.358 2.086 1.067 8
0.382 2.323 1.677 9
0.274 2.593 2.137 8
0.131 2.817 2.276 8
0.062 2.991 2.084 9
0.067 3.14 1.781 8
0.086 3.203 1.429 9
0.077 2.883 1.286 8
0.083 2.961 0.921 7
0.074 2.968 0.744 10
0.043 2.834 0.875 8
-0.019 2.695 1.234 8
-0.101 2.572 1.536 9
-0.121 2.398 1.475 8
-0.109 2.158 1.328 9
-0.027 1.931 0.965 8
0.082 1.669 0.55 8
0.149 1.403 0.222 9
0.139 1.127 0.066 8
0.06 0.835 0.107 9
0.054 0.752 0.096 6
-0.031 0.484 0.176 10
-0.069 0.304 0.193 9
-0.054 0.238 0.127 8
-0.032 0.25 -0.014 9
-0.045 0.304 -0.202 8
-0.1 0.365 -0.374 8
-0.139 0.381 -0.345 9
-0.125 0.342 -0.31 8
-0.089 0.25 -0.07 9
-0.003 0.072 0.232 8
0.056 -0.194 0.558 8
0.081 -0.61 0.857 7
0.066 -0.969 0.985 10
0.023 -1.29 0.979 9
0.02 -1.161 0.881 8
-0.056 -1.484 0.816 8
-0.193 -1.616 0.671 9
-0.301 -1.596 0.434 8
-0.297 -1.588 0.155 8
-0.168 -1.74 -0.024 9
-0.014 -1.933 -0.111 8
-0.012 -1.739 -0.1 9
0.063 -1.857 -0.106 8
-0.005 -1.939 -0.022 7
-0.286 -2.015 0.088 10
-0.596 -2.071 0.109 8
-0.732 -2.112 -0.027 9
-0.659 -1.901 -0.024 8
-0.668 -1.952 -0.022 8
-0.609 -1.872 -0.597 9
-0.455 -1.677 -0.885 8
-0.235 -1.578 -1.012 9
-0.053 -1.587 -1.025 8
0.05 -1.544 -1.001 8
0.045 -1.389 -0.901 9
0.076 -1.222 -0.89 6
0.075 -0.912 -0.876 11
0.085 -0.598 -0.844 8
0.139 -0.398 -0.8 8
0.232 -0.292 -0.772 9
0.331 -0.241 -0.77 8
0.298 -0.217 -0.693 9
0.361 -0.17 -0.654 8
0.351 -0.074 -0.488 8
0.278 0.075 -0.266 9
0.145 0.221 -0.117 8
-0.016 0.346 -0.067 8
-0.014 0.311 -0.061 7
-0.157 0.431 -0.144 10
-0.305 0.514 -0.345 9
-0.46 0.547 -0.546 8
-0.496 0.547 -0.621 8
-0.416 0.519 -0.603 9
-0.289 0.455 -0.517 8
-0.157 0.354 -0.277 9
-0.141 0.318 -0.249 8
-0.043 0.165 0.037 8
0.034 -0.022 0.228 9
0.095 -0.213 0.303 8
0.118 -0.354 0.295 7
0.085 -0.397 0.251 10
-0.034 -0.357 0.198 8
-0.031 -0.321 0.178 9
-0.209 -0.262 0.169 8
-0.329 -0.254 0.257 8
-0.315 -0.317 0.402 9
-0.154 -0.474 0.508 8
0.084 -0.676 0.477 9
0.309 -0.796 0.282 8
0.278 -0.716 0.254 8
0.461 -0.76 -0.081 9
0.614 -0.756 -0.459 7
0.708 -0.703 -0.669 10
0.709 -0.596 -0.653 8
0.609 -0.465 -0.508 8
0.415 -0.309 -0.363 9
0.374 -0.278 -0.326 8
0.161 -0.068 -0.266 9
-0.004 0.121 -0.328 8
-0.082 0.279 -0.493 8
-0.064 0.405 -0.636 9
0.03 0.43 -0.687 8
0.174 0.397 -0.667 9
0.157 0.357 -0.6 6
0.309 0.345 -0.533 10
0.413 0.358 -0.368 9
0.444 0.382 -0.107 8
0.402 0.407 0.197 9
0.29 0.402 0.458 8
0.132 0.412 0.615 8
0.118 0.371 0.553 9
-0.033 0.433 0.637 8
-0.142 0.469 0.669 9
-0.206 0.433 0.68 8
-0.212 0.361 0.66 8
-0.191 0.324 0.594 7
-0.114 0.206 0.499 10
-0.103 0.185 0.449 8
-0.048 0.071 0.356 9
-0.031 -0.044 0.28 8
-0.057 -0.126 0.216 9
-0.083 -0.182 0.147 8
-0.08 -0.237 0.061 8
-0.072 -0.214 -0.05 9
-0.065 -0.192 -0.045 8
-0.07 -0.25 -0.117 9
-0.071 -0.254 -0.115 8
-0.065 -0.253 -0.138 7
-0.057 -0.234 -0.242 10
-0.047 -0.211 -0.402 8
-0.042 -0.19 -0.362 9
-0.036 -0.17 -0.518 8
-0.028 -0.138 -0.595 8
-0.03 -0.1 -0.583 9
-0.048 -0.053 -0.49 8
-0.07 0.006 -0.326 9
-0.132 0.073 -0.097 8
-0.119 0.066 -0.087 8
-0.224 0.127 0.151 9
-0.293 0.149 0.299 6
-0.281 0.143 0.338 10
-0.214 0.125 0.308 9
-0.136 0.079 0.238 8
-0.05 0.064 0.138 9
-0.045 0.058 0.124 8
0.046 0.079 0.018 8
0.124 0.054 -0.015 9
0.191 -0.022 0.033 8
0.24 -0.094 0.086 9
0.242 -0.09 0.117 8
0.18 0.009 0.147 8
0.162 0.008 0.132 7
0.052 0.115 0.161 10
-0.057 0.164 0.172 9
-0.111 0.157 0.162 8
-0.101 0.107 0.133 8
-0.072 0.043 0.089 9
-0.064 -0.027 0.059 8
-0.058 -0.024 0.053 9
-0.036 -0.099 0.061 8
0.024 -0.166 0.082 8
0.087 -0.218 0.074 9
0.107 -0.224 0.021 8
0.065 -0.171 -0.058 7
-0.009 -0.066 -0.139 10
-0.008 -0.06 -0.125 8
-0.076 0.05 -0.172 9
-0.102 0.105 -0.21 8
-0.064 0.087 -0.244 8
0.013 0.04 -0.275 9
0.092 -0.004 -0.313 8
0.151 -0.036 -0.329 9
0.136 -0.033 -0.296 8
0.156 -0.038 -0.28 8
0.153 -0.042 -0.238 9
0.163 -0.06 -0.198 7
0.202 -0.085 -0.164 10
0.256 -0.108 -0.091 8
0.285 -0.117 0.043 8
0.257 -0.106 0.039 9
0.219 -0.098 0.174 8
0.137 -0.047 0.257 9
0.06 0.048 0.28 8
0.003 0.14 0.268 8
-0.031 0.181 0.243 9
-0.044 0.193 0.19 8
-0.039 0.174 0.171 9
-0.045 0.201 0.11 6
-0.046 0.192 0.085 10
-0.033 0.096 0.105 9
-0.023 -0.02 0.135 8
-0.042 -0.074 0.133 8
-0.084 -0.049 0.088 9
-0.076 -0.044 0.079 8
-0.105 0.016 -0.035 9
-0.099 0.048 -0.201 8
-0.069 0.033 -0.336 8
-0.033 -0.005 -0.377 9
-0.013 -0.059 -0.303 8
-0.011 -0.053 -0.272 7
-0.008 -0.1 -0.129 10
-0.011 -0.103 -0.038 8
-0.015 -0.06 -0.062 9
-0.002 -0.016 -0.141 8
0.026 -0.021 -0.201 9
0.062 -0.051 -0.222 8
0.081 -0.061 -0.21 8
0.073 -0.055 -0.189 9
0.063 -0.044 -0.113 8
0.043 -0.019 0.022 9
0.007 0.026 0.116 8
-0.026 0.084 0.084 7
-0.037 0.109 -0.001 10
-0.034 0.097 -0.045 8
-0.045 0.087 -0.04 9
-0.081 0.085 -0.048 8
-0.122 0.099 -0.018 8
-0.138 0.09 0.044 9
-0.114 0.047 0.111 8
-0.062 -0.013 0.176 9
-0.056 -0.012 0.158 8
-0.007 -0.039 0.2 8
0.009 -0.001 0.19 9
0.005 0.078 0.151 6
0.003 0.141 0.103 10
0.007 0.157 0.079 9
0.004 0.135 0.087 8
0.004 0.121 0.078 9
-0.004 0.097 0.098 8
-0.018 0.09 0.111 8
-0.036 0.078 0.097 9
-0.04 0.037 0.07 8
-0.009 -0.052 0.023 9
0.039 -0.152 -0.018 8
0.035 -0.137 -0.016 8
0.083 -0.2 -0.031 7
0.114 -0.22 -0.067 10
0.126 -0.191 -0.235 9
0.145 -0.135 -0.366 8
0.143 -0.129 -0.314 8
0.096 -0.118 -0.241 9
0.087 -0.107 -0.217 8
0.013 -0.002 -0.197 9
-0.044 0.118 -0.216 8
-0.075 0.172 -0.194 8
-0.08 0.156 -0.133 9
-0.047 0.104 -0.046 8
-0.042 0.094 -0.042 7
-0.002 0.07 0.072 10
0.025 0.064 0.177 8
0.048 0.029 0.223 9
0.082 -0.029 0.181 8
0.105 -0.065 0.084 8
0.091 -0.067 -0.01 9
0.038 -0.038 -0.07 8
0.034 -0.034 -0.063 9
-0.034 0.02 -0.111 8
-0.106 0.098 -0.155 8
-0.163 0.178 -0.181 9
-0.168 0.204 -0.174 7
-0.127 0.165 -0.129 10
-0.088 0.086 -0.084 8
-0.079 0.077 -0.076 8
-0.057 0.008 -0.031 9
-0.04 -0.045 0.004 8
-0.024 -0.103 0.021 9
0.002 -0.161 0.052 8
0.029 -0.21 0.098 8
0.048 -0.241 0.141 9
0.043 -0.217 0.126 8
0.048 -0.224 0.163 9
0.036 -0.192 0.16 6
0.025 -0.132 0.102 10
0.024 -0.055 0.003 9
0.034 0.042 -0.091 8
0.042 0.117 -0.115 8
0.038 0.105 -0.104 9
0.017 0.156 -0.051 8
-0.031 0.213 0.054 9
-0.077 0.256 0.151 8
-0.094 0.24 0.179 8
-0.095 0.157 0.152 9
-0.096 0.063 0.117 8
-0.087 0.057 0.105 7
-0.068 -0.027 0.084 10
-0.043 -0.086 0.064 8
-0.018 -0.131 0.091 9
0.032 -0.171 0.172 8
0.068 -0.18 0.192 9
0.064 -0.138 0.127 8
0.058 -0.124 0.114 8
0.042 -0.081 0.036 9
0.021 -0.07 -0.016 8
0.01 -0.079 -0.06 9
0.011 -0.082 -0.118 8
0.01 -0.074 -0.106 7
0.015 -0.044 -0.229 10
0.014 -0.039 -0.206 8
-0.022 0.019 -0.22 8
-0.095 0.101 -0.21 9
-0.18 0.185 -0.159 8
-0.249 0.237 -0.068 9
-0.292 0.221 0.014 8
-0.293 0.172 0.029 8
-0.263 0.154 0.026 9
-0.225 0.109 -0.025 8
-0.153 0.068 -0.113 9
-0.067 0.04 -0.225 6
-0.011 0.008 -0.323 10
0.009 0.004 -0.329 9
0.008 0.023 -0.222 8
0.007 0.021 -0.2 9
0.021 -0.006 -0.081 8
0.038 -0.058 0.0 8
0.075 -0.109 0.028 9
0.097 -0.137 0.017 8
0.1 -0.113 0.003 9
0.09 -0.102 0.002 8
0.067 -0.028 0.002 8
0.004 0.079 0.024 7
-0.067 0.171 0.056 10
-0.099 0.203 0.034 9
-0.095 0.185 -0.017 8
-0.079 0.152 -0.052 8
-0.071 0.137 -0.047 9
-0.049 0.128 -0.079 8
-0.034 0.14 -0.132 8
-0.017 0.136 -0.179 9
0.015 0.106 -0.232 8
0.057 0.054 -0.286 9
0.096 -0.002 -0.299 8
0.087 -0.002 -0.269 7
0.108 -0.03 -0.217 10
0.107 -0.022 -0.104 8
0.085 0.0 0.019 9
0.05 0.02 0.121 8
0.012 0.027 0.177 8
-0.019 0.032 0.239 9
-0.017 0.029 0.215 8
-0.025 -0.012 0.29 9
-0.013 -0.091 0.349 8
-0.015 -0.131 0.377 8
-0.029 -0.111 0.358 9
-0.016 -0.075 0.328 6
0.035 -0.071 0.31 11
0.031 -0.064 0.279 8
0.082 -0.104 0.268 8
0.115 -0.155 0.26 9
0.12 -0.151 0.234 8
0.101 -0.095 0.168 8
0.078 -0.04 0.055 9
0.065 -0.024 -0.023 8
0.059 -0.022 -0.02 9
0.062 -0.051 -0.055 8
0.073 -0.103 -0.073 8
0.063 -0.153 -0.044 7
0.026 -0.178 0.031 10
-0.02 -0.182 0.144 9
-0.047 -0.191 0.234 8
-0.042 -0.172 0.21 8
-0.023 -0.178 0.247 9
0.028 -0.181 0.242 8
0.058 -0.158 0.098 9
0.073 -0.14 -0.078 8
0.103 -0.16 -0.026 8
0.093 -0.151 0.134 9
0.084 -0.136 0.121 8
0.023 -0.008 0.222 7
-0.026 0.198 0.258 10
-0.019 0.349 0.252 8
0.039 0.423 0.259 9
0.102 0.482 0.285 8
0.143 0.546 0.349 8
0.129 0.491 0.314 9
0.105 0.546 0.434 8
0.019 0.646 0.534 9
-0.073 0.846 0.575 8
-0.179 1.066 0.595 8
-0.238 1.194 0.567 9
# end
#Thu Feb 26 20:21:53 GMT+08:00 2015 
