# Supplementary material for: Abnormal Gait Behavior Detection for Elderly Based on Enhanced Wigner-Ville Analysis and Cloud Incremental SVM Learning
Source: Hindawi journal article supplement (doi:10.1155/2016/5869238), 2016-01-01
Supplement: f1 [file 5869238.f1.zip › Supplementary Materials/Original Data/Stumbling without fall/original__152.txt]

# Accelerometer Values
# filename:  original__152.txt
# Saving start time: Thu Feb 26 20:43:21 GMT+08:00 2015

# sensor resolution: 0.0095825195m/s^2
#Sensorvendor: KIONIX, name: KX023 Accelerometer, type: 1,version : 1, range 39.240005

# X value, Y value, Z value, time diff in ms
-0.181 0.078 -0.141 8
-0.181 0.049 -0.231 8
-0.19 0.018 -0.268 9
-0.141 -0.038 -0.257 8
-0.031 -0.08 -0.231 9
-0.028 -0.072 -0.208 8
0.099 -0.049 -0.19 8
0.243 -0.016 -0.165 9
0.377 -0.035 -0.138 8
0.465 -0.075 -0.136 7
0.533 -0.106 -0.14 10
0.48 -0.096 -0.126 8
0.551 -0.144 -0.109 9
0.597 -0.196 -0.08 8
0.617 -0.244 -0.096 9
0.623 -0.279 -0.156 8
0.652 -0.291 -0.249 8
0.743 -0.294 -0.396 9
0.668 -0.264 -0.357 8
0.783 -0.272 -0.482 8
0.916 -0.272 -0.489 9
1.096 -0.294 -0.338 7
1.287 -0.387 -0.19 10
1.489 -0.481 -0.204 8
1.34 -0.433 -0.296 8
1.614 -0.39 -0.266 9
1.883 -0.524 -0.292 8
2.016 -0.537 -0.148 9
1.988 -0.51 0.15 8
1.834 -0.458 0.437 8
1.637 -0.399 0.572 9
1.474 -0.359 0.515 8
1.334 -0.228 0.544 9
1.316 0.072 0.468 6
1.42 0.494 0.218 10
1.499 0.897 -0.214 9
1.419 1.145 -0.515 8
1.102 1.249 -0.397 9
0.992 1.124 -0.357 8
0.441 1.238 0.002 8
-0.236 1.363 0.318 9
-0.932 1.437 0.615 8
-1.621 1.411 1.077 9
-2.275 1.282 1.594 8
-2.047 1.154 1.435 8
-2.616 0.992 1.759 7
-3.042 0.813 1.848 10
-3.261 0.59 1.96 8
-3.247 0.312 2.201 9
-3.178 -0.041 2.468 8
-3.21 -0.458 2.636 9
-2.889 -0.412 2.372 8
-2.991 -0.879 2.216 8
-2.966 -1.243 1.715 9
-2.773 -1.511 1.141 8
-2.402 -1.835 0.664 9
-1.87 -2.235 0.441 8
-1.683 -2.011 0.397 7
-1.165 -2.409 0.505 10
-0.643 -2.724 0.721 8
-0.127 -2.915 0.838 9
0.187 -2.743 0.782 8
0.302 -2.29 0.413 8
0.336 -1.762 -0.071 9
0.303 -1.586 -0.064 8
0.312 -0.94 -0.284 9
0.319 -0.154 -0.264 8
0.474 0.5 -0.148 8
0.825 0.787 0.095 9
1.214 0.753 0.41 6
1.407 0.488 0.629 11
1.266 0.44 0.566 8
1.131 0.234 0.66 8
0.756 0.273 0.753 9
0.396 0.34 0.903 8
0.267 0.351 0.85 8
0.395 0.322 0.634 9
0.638 0.267 0.648 8
0.574 0.24 0.583 9
0.822 0.14 0.824 8
1.088 -0.08 1.01 8
1.359 -0.326 1.066 7
1.521 -0.568 1.081 10
1.567 -0.879 1.04 9
1.411 -0.791 0.936 8
1.434 -1.075 0.826 8
1.431 -1.238 0.656 9
1.385 -1.346 0.394 8
1.298 -1.427 0.003 9
1.206 -1.451 -0.515 8
1.125 -1.434 -0.99 8
1.012 -1.29 -0.891 9
0.991 -1.326 -1.127 8
1.116 -1.452 -1.171 7
1.406 -1.655 -1.19 10
1.758 -1.86 -1.266 8
2.017 -1.941 -1.384 9
2.008 -1.84 -1.453 8
1.807 -1.656 -1.307 8
1.325 -1.25 -1.317 9
0.544 -0.688 -1.287 8
-0.001 -0.363 -1.209 9
-0.209 -0.205 -1.111 8
-0.157 -0.065 -1.085 8
-0.141 -0.058 -0.976 9
0.133 0.073 -1.161 7
0.404 0.27 -1.56 10
0.388 0.54 -2.008 8
0.089 0.916 -2.247 8
-0.311 1.352 -2.217 9
-0.748 1.678 -1.972 8
-0.673 1.51 -1.774 9
-1.019 1.685 -1.289 8
-1.158 1.653 -0.607 8
-1.101 1.441 0.045 9
-0.813 1.174 0.452 8
-0.452 0.972 0.59 9
-0.406 0.875 0.531 6
-0.219 0.744 0.573 10
-0.254 0.655 0.683 9
-0.445 0.629 0.775 8
-0.649 0.633 0.788 9
-0.766 0.567 0.837 8
-0.788 0.406 0.824 8
-0.709 0.365 0.742 9
-0.687 0.193 0.631 8
-0.708 0.114 0.439 8
-0.797 0.148 0.169 9
-0.871 0.239 -0.199 8
-0.821 0.362 -0.611 7
-0.611 0.43 -0.874 10
-0.55 0.387 -0.787 8
-0.303 0.39 -0.898 9
-0.141 0.432 -0.95 8
-0.1 0.508 -0.965 9
-0.197 0.589 -0.903 8
-0.259 0.558 -0.807 8
-0.165 0.364 -0.681 9
-0.148 0.328 -0.613 8
-0.023 0.108 -0.404 9
0.053 -0.072 -0.09 8
0.083 -0.238 0.256 7
0.084 -0.404 0.481 10
0.071 -0.521 0.496 8
0.064 -0.469 0.447 9
0.023 -0.536 0.271 8
-0.126 -0.525 0.033 8
-0.389 -0.396 -0.139 9
-0.634 -0.193 -0.245 8
-0.764 -0.002 -0.295 8
-0.799 0.172 -0.297 9
-0.719 0.154 -0.267 8
-0.693 0.351 -0.239 9
-0.616 0.534 -0.174 6
-0.533 0.67 -0.034 10
-0.469 0.736 0.193 9
-0.401 0.742 0.36 8
-0.311 0.706 0.275 9
-0.28 0.635 0.248 8
-0.268 0.642 -0.008 8
-0.451 0.798 -0.274 9
-0.746 1.056 -0.503 8
-0.945 1.226 -0.621 9
-0.927 1.24 -0.541 8
-0.834 1.116 -0.487 8
-0.595 1.013 -0.265 7
-0.259 0.81 0.01 10
-0.033 0.614 0.328 9
0.054 0.459 0.66 8
0.101 0.313 0.867 8
0.183 0.125 0.842 9
0.165 0.113 0.758 8
0.287 -0.057 0.581 9
0.389 -0.115 0.29 8
0.439 -0.088 -0.004 8
0.424 0.008 -0.18 9
0.365 0.149 -0.303 8
0.328 0.134 -0.272 7
0.279 0.318 -0.411 10
0.27 0.49 -0.696 8
0.369 0.488 -1.077 9
0.536 0.367 -1.224 8
0.639 0.254 -1.042 8
0.654 0.152 -0.73 9
0.588 0.137 -0.657 8
0.454 0.109 -0.324 9
0.157 0.166 0.03 8
-0.145 0.286 0.402 8
-0.36 0.413 0.706 9
-0.433 0.479 0.763 6
-0.327 0.456 0.557 11
-0.294 0.41 0.501 8
-0.098 0.35 0.202 8
0.047 0.304 -0.052 9
0.081 0.278 -0.316 8
0.018 0.281 -0.686 9
-0.008 0.272 -1.015 8
0.056 0.22 -1.181 8
0.05 0.198 -1.063 9
-0.012 0.213 -1.093 8
-0.201 0.343 -1.016 9
-0.293 0.405 -0.963 6
-0.278 0.364 -0.938 10
-0.253 0.317 -0.843 9
-0.227 0.285 -0.758 8
-0.229 0.266 -0.592 8
-0.249 0.259 -0.341 9
-0.273 0.189 -0.058 8
-0.289 0.114 0.172 9
-0.268 0.057 0.301 8
-0.197 -0.019 0.324 8
-0.178 -0.017 0.291 9
-0.106 -0.068 0.309 8
-0.053 -0.09 0.291 7
-0.011 -0.108 0.176 10
0.005 -0.102 0.011 8
-0.042 -0.073 -0.054 9
-0.176 -0.015 0.082 8
-0.158 -0.013 0.074 9
-0.29 0.036 0.274 8
-0.385 0.072 0.41 8
-0.437 0.08 0.472 9
-0.404 0.028 0.478 8
-0.31 -0.03 0.473 9
-0.279 -0.027 0.426 8
-0.153 -0.064 0.421 7
-0.031 -0.085 0.419 10
0.012 -0.085 0.437 8
-0.005 -0.073 0.436 8
-0.024 -0.061 0.396 9
-0.028 -0.048 0.302 8
-0.026 -0.043 0.272 9
-0.015 -0.023 0.165 8
-0.016 0.0 0.101 8
-0.029 0.02 0.068 9
-0.023 0.031 0.047 8
0.008 0.03 0.053 9
0.007 0.027 0.048 6
0.052 0.01 0.061 10
0.09 -0.008 0.05 9
0.112 -0.02 0.025 8
0.159 -0.043 0.014 9
0.208 -0.065 -0.029 8
0.166 -0.047 -0.088 8
0.15 -0.042 -0.079 9
0.073 -0.004 -0.107 8
0.034 0.02 -0.178 9
-0.009 0.058 -0.275 8
-0.028 0.07 -0.323 8
-0.011 0.031 -0.327 7
-0.019 0.021 -0.249 10
-0.017 0.019 -0.224 9
-0.027 0.022 -0.17 8
0.005 0.015 -0.161 8
0.074 -0.005 -0.123 9
0.14 -0.034 -0.078 8
0.164 -0.043 -0.061 8
0.14 -0.024 -0.111 9
0.126 -0.022 -0.1 8
0.086 0.024 -0.161 9
0.067 0.049 -0.206 8
0.037 0.111 -0.266 7
-0.02 0.221 -0.298 10
-0.055 0.279 -0.258 8
-0.049 0.251 -0.232 9
-0.027 0.181 -0.209 8
0.026 0.086 -0.207 8
0.065 0.054 0.004 9
0.106 -0.012 0.149 8
0.153 -0.084 0.279 9
0.166 -0.127 0.374 8
0.149 -0.115 0.337 8
0.145 -0.128 0.424 9
0.127 -0.106 0.52 6
0.082 -0.044 0.595 11
0.05 0.01 0.581 8
0.057 0.024 0.455 8
0.078 0.026 0.297 9
0.07 0.023 0.268 8
0.105 0.011 0.122 9
0.148 0.01 -0.043 8
0.185 0.023 -0.247 8
0.191 0.053 -0.45 9
# end
#Thu Feb 26 20:43:23 GMT+08:00 20150
