# Supplementary material for: Abnormal Gait Behavior Detection for Elderly Based on Enhanced Wigner-Ville Analysis and Cloud Incremental SVM Learning
Source: Hindawi journal article supplement (doi:10.1155/2016/5869238), 2016-01-01
Supplement: f1 [file 5869238.f1.zip › Supplementary Materials/Original Data/Stumbling without fall/original__153.txt]

# Accelerometer Values
# filename:  original__153.txt
# Saving start time: Thu Feb 26 20:43:25 GMT+08:00 2015

# sensor resolution: 0.0095825195m/s^2
#Sensorvendor: KIONIX, name: KX023 Accelerometer, type: 1,version : 1, range 39.240005

# X value, Y value, Z value, time diff in ms
0.629 -0.05 -0.469 9
0.629 -0.018 -0.463 8
0.596 0.057 -0.455 9
0.536 0.051 -0.41 6
0.522 0.12 -0.409 10
0.515 0.158 -0.39 9
0.494 0.18 -0.345 8
0.49 0.166 -0.258 9
0.488 0.108 -0.114 8
0.444 0.06 0.094 8
0.399 0.054 0.085 9
0.331 0.022 0.309 8
0.268 -0.017 0.461 9
0.226 -0.058 0.521 8
0.184 -0.079 0.5 8
0.166 -0.071 0.45 7
0.046 0.082 0.302 10
0.041 0.073 0.272 9
-0.041 0.18 0.166 8
-0.086 0.217 0.046 8
-0.107 0.192 -0.048 9
-0.146 0.134 -0.033 8
-0.172 0.035 0.104 8
-0.155 0.032 0.093 9
-0.127 -0.085 0.263 8
-0.058 -0.156 0.371 9
0.014 -0.183 0.404 8
0.073 -0.178 0.386 7
0.108 -0.125 0.327 10
0.109 -0.03 0.213 8
0.098 -0.027 0.192 9
0.09 0.082 0.038 8
0.094 0.125 -0.13 8
0.118 0.062 -0.303 9
0.148 -0.037 -0.403 8
0.141 -0.111 -0.314 9
0.113 -0.159 -0.1 8
0.101 -0.143 -0.09 8
0.088 -0.17 0.064 9
0.104 -0.175 0.089 6
0.142 -0.167 0.017 11
0.155 -0.153 -0.135 8
0.12 -0.131 -0.324 8
0.108 -0.118 -0.292 9
0.065 -0.092 -0.425 8
0.052 -0.076 -0.484 8
0.069 -0.069 -0.495 9
0.098 -0.056 -0.471 8
0.109 -0.05 -0.433 9
0.105 -0.049 -0.359 8
0.094 -0.044 -0.323 8
0.107 -0.047 -0.171 7
0.135 -0.053 0.04 10
0.17 -0.056 0.215 9
0.206 -0.053 0.276 8
0.248 -0.04 0.18 8
0.223 -0.007 -0.036 9
0.288 -0.006 -0.032 8
0.385 0.05 -0.221 9
0.495 0.083 -0.309 8
0.576 0.062 -0.325 8
0.602 0.021 -0.222 9
0.563 -0.006 0.041 8
0.506 -0.005 0.037 7
0.437 -0.022 0.331 10
0.374 -0.038 0.51 8
0.33 -0.048 0.553 9
0.299 -0.047 0.463 8
0.273 -0.038 0.313 8
0.264 -0.033 0.145 9
0.237 -0.03 0.13 8
0.254 -0.032 -0.053 9
0.261 -0.036 -0.201 8
0.223 -0.037 -0.29 8
0.15 -0.04 -0.326 9
0.135 -0.036 -0.293 7
-0.057 -0.139 -0.277 10
-0.052 -0.125 -0.249 8
-0.203 -0.16 -0.206 8
-0.387 -0.143 -0.134 9
-0.422 -0.247 -0.03 8
-0.401 -0.333 0.015 9
-0.492 -0.3 0.011 8
-0.443 -0.27 0.01 8
-0.597 -0.215 0.018 9
-0.72 -0.198 -0.013 8
-0.86 -0.22 -0.12 9
-1.054 -0.237 -0.22 6
-1.171 -0.282 -0.259 10
-1.152 -0.43 -0.243 9
-1.037 -0.387 -0.219 8
-0.991 -0.548 -0.179 9
-1.031 -0.588 -0.154 8
-1.223 -0.505 -0.161 8
-1.428 -0.305 -0.183 9
-1.583 0.064 -0.324 8
-1.814 0.54 -0.474 8
-1.633 0.486 -0.426 9
-2.013 0.945 -0.383 8
-2.449 1.383 -0.24 7
-2.903 1.768 -0.122 10
-3.206 1.876 0.06 8
-2.96 1.47 0.47 9
-2.664 1.323 0.423 8
-1.999 0.761 0.929 9
-1.291 0.484 1.345 8
-0.598 0.449 1.597 8
0.081 0.466 1.641 9
0.761 0.404 1.55 8
1.447 0.266 1.4 9
1.303 0.24 1.26 8
1.902 0.067 1.163 7
2.369 -0.151 1.042 10
2.723 -0.372 0.807 8
2.979 -0.521 0.429 9
3.153 -0.6 -0.011 8
2.837 -0.54 -0.009 8
3.002 -0.728 -0.284 9
3.171 -1.015 -0.308 8
3.253 -1.215 -0.131 8
3.121 -1.363 0.275 9
2.772 -1.541 0.91 8
2.312 -1.722 1.565 9
2.081 -1.55 1.408 6
1.724 -1.791 1.916 10
1.589 -2.087 2.226 9
1.711 -2.416 2.458 8
2.004 -2.788 2.589 9
2.251 -3.105 2.501 8
2.388 -3.201 2.184 8
2.15 -2.881 1.966 9
2.238 -2.638 1.424 8
2.093 -2.028 0.682 9
1.716 -1.194 -0.042 8
1.193 -0.28 -0.434 8
1.074 -0.252 -0.391 7
0.422 0.54 -0.412 10
-0.184 1.12 0.024 9
-0.566 1.373 0.999 8
-0.616 1.343 2.175 8
-0.446 1.275 3.006 9
-0.349 1.236 3.093 8
-0.373 1.186 2.496 9
-0.335 1.067 2.247 8
-0.433 1.003 1.281 8
-0.568 0.969 0.235 9
-0.665 0.866 -0.441 8
-0.702 0.544 -0.4 7
-0.681 0.098 0.04 10
-0.606 -0.347 0.315 8
-0.546 -0.312 0.283 9
-0.603 -0.526 0.062 8
-0.967 -0.33 -0.536 8
-1.458 0.057 -1.026 9
-1.737 0.337 -1.292 8
-1.705 0.368 -1.447 9
-1.534 0.331 -1.302 8
-1.336 0.137 -1.256 8
-1.231 -0.113 -1.049 9
-1.349 -0.291 -0.775 7
-1.522 -0.51 -0.413 10
-1.606 -0.86 -0.064 8
-1.495 -1.133 0.03 8
-1.345 -1.02 0.027 9
-1.096 -1.124 -0.214 8
-0.849 -1.154 -0.473 9
-0.768 -1.151 -0.616 8
-0.951 -1.053 -0.727 8
-1.189 -0.94 -0.687 9
-1.362 -0.928 -0.389 8
-1.226 -0.835 -0.35 9
-1.399 -0.841 0.056 6
-1.509 -0.821 0.38 10
-1.504 -0.848 0.603 9
-1.304 -0.91 0.726 8
-0.944 -0.976 0.666 8
-0.849 -0.878 0.599 9
-0.529 -0.739 0.362 8
-0.29 -0.378 -0.1 9
-0.118 0.03 -0.753 8
-0.013 0.509 -1.296 8
-0.016 0.805 -1.468 9
-0.052 0.724 -1.346 8
-0.047 0.652 -1.211 7
0.048 0.403 -0.889 10
0.186 0.201 -0.468 8
0.186 0.066 -0.183 9
0.174 -0.092 -0.033 8
0.355 -0.297 0.035 9
0.666 -0.443 0.037 8
0.6 -0.398 0.033 8
0.904 -0.426 -0.035 9
1.083 -0.397 -0.118 8
1.124 -0.351 -0.09 9
1.101 -0.302 0.044 8
0.991 -0.272 0.04 7
0.973 -0.284 0.317 10
0.962 -0.255 0.285 8
0.96 -0.46 0.224 9
0.945 -0.452 0.037 8
0.745 -0.16 -0.254 8
0.359 0.324 -0.604 9
0.031 0.759 -0.928 8
0.028 0.683 -0.835 8
-0.153 1.004 -1.189 9
-0.229 1.251 -1.523 8
-0.153 1.312 -1.755 9
0.108 1.11 -1.764 6
0.386 0.812 -1.574 10
0.523 0.536 -1.325 9
0.47 0.483 -1.193 8
0.508 0.228 -0.869 9
0.5 0.001 -0.468 8
0.465 -0.167 -0.168 8
0.412 -0.271 -0.044 9
0.312 -0.273 -0.032 8
0.16 -0.17 -0.098 9
0.144 -0.153 -0.089 8
-0.007 0.026 -0.186 8
-0.112 0.252 -0.294 7
-0.155 0.422 -0.431 10
-0.187 0.528 -0.63 9
-0.206 0.707 -0.924 8
-0.185 0.636 -0.832 8
-0.179 0.861 -1.108 9
-0.181 1.001 -1.216 8
-0.213 1.049 -1.182 9
-0.281 1.048 -0.973 8
-0.372 1.087 -0.634 8
-0.445 1.135 -0.403 9
-0.401 1.022 -0.362 8
-0.472 1.014 -0.342 7
-0.567 0.971 -0.428 10
-0.651 0.927 -0.433 8
-0.683 0.879 -0.3 9
-0.629 0.827 -0.197 8
-0.509 0.723 -0.163 8
-0.458 0.65 -0.147 9
-0.332 0.553 0.053 8
-0.26 0.488 0.352 9
-0.186 0.425 0.467 8
-0.052 0.315 0.473 8
0.053 0.158 0.547 9
0.047 0.142 0.492 6
0.114 0.062 0.695 11
0.138 0.033 0.905 8
0.12 0.019 0.999 8
0.093 0.058 0.876 9
0.083 0.13 0.532 8
0.136 0.2 0.177 9
0.123 0.18 0.16 8
0.197 0.232 -0.082 8
0.169 0.31 -0.232 9
0.066 0.46 -0.339 8
-0.018 0.588 -0.421 8
-0.048 0.611 -0.484 7
-0.033 0.567 -0.498 10
-0.03 0.511 -0.448 9
-0.018 0.481 -0.348 8
-0.011 0.459 -0.19 8
0.017 0.417 -0.092 9
0.084 0.358 -0.081 8
0.161 0.321 -0.105 9
0.145 0.289 -0.095 8
0.167 0.284 -0.1 8
0.127 0.27 -0.097 9
0.075 0.25 -0.077 8
0.022 0.231 -0.079 7
-0.026 0.211 -0.161 10
-0.055 0.194 -0.262 8
-0.049 0.175 -0.236 9
-0.069 0.165 -0.257 8
-0.073 0.156 -0.168 9
-0.057 0.134 -0.032 8
-0.045 0.111 0.058 8
-0.041 0.097 0.098 9
-0.062 0.091 0.135 8
-0.056 0.082 0.121 9
-0.106 0.097 0.175 8
-0.145 0.114 0.238 7
-0.137 0.105 0.269 10
-0.093 0.075 0.255 8
-0.056 0.058 0.202 8
-0.042 0.066 0.123 9
-0.038 0.059 0.111 8
-0.019 0.065 0.061 9
0.022 0.054 0.046 8
0.056 0.04 0.0 8
0.057 0.044 -0.077 9
0.025 0.061 -0.138 8
0.023 0.055 -0.124 9
-0.014 0.096 -0.171 6
-0.034 0.119 -0.206 10
-0.034 0.084 -0.22 9
-0.021 0.044 -0.208 8
-0.013 0.021 -0.186 9
-0.021 0.0 -0.15 8
-0.018 0.0 -0.135 8
-0.014 -0.013 -0.129 9
0.024 -0.026 -0.172 8
0.033 -0.019 -0.191 9
0.019 -0.013 -0.166 8
0.002 0.007 -0.159 8
0.002 0.006 -0.143 7
-0.039 0.036 -0.151 10
-0.126 0.138 -0.146 8
-0.191 0.205 -0.129 9
-0.184 0.205 -0.094 8
-0.161 0.203 -0.071 9
-0.104 0.136 -0.092 8
-0.093 0.122 -0.083 8
-0.044 0.069 -0.094 9
-0.031 0.055 -0.08 8
-0.049 0.091 -0.068 9
-0.114 0.136 -0.065 8
-0.173 0.181 -0.111 7
-0.164 0.218 -0.155 10
-0.148 0.196 -0.14 8
-0.117 0.2 -0.155 9
-0.123 0.212 -0.18 8
-0.164 0.241 -0.179 8
-0.182 0.225 -0.159 9
-0.155 0.169 -0.142 8
-0.119 0.13 -0.076 9
-0.107 0.117 -0.068 8
-0.065 0.082 0.045 8
0.004 0.024 0.187 9
0.082 -0.064 0.305 6
0.142 -0.173 0.289 11
0.151 -0.183 0.302 8
0.092 -0.116 0.333 8
0.083 -0.104 0.3 9
0.047 -0.077 0.284 8
0.048 -0.027 0.307 9
0.013 0.045 0.313 8
-0.007 0.109 0.326 8
0.006 0.155 0.334 9
0.005 0.14 0.301 8
0.019 0.157 0.284 8
0.039 0.15 0.252 7
0.071 0.111 0.231 10
# end
#Thu Feb 26 20:43:28 GMT+08:00 2015 
