# Supplementary material for: Abnormal Gait Behavior Detection for Elderly Based on Enhanced Wigner-Ville Analysis and Cloud Incremental SVM Learning
Source: Hindawi journal article supplement (doi:10.1155/2016/5869238), 2016-01-01
Supplement: f1 [file 5869238.f1.zip › Supplementary Materials/Original Data/Stumbling without fall/original__154.txt]

# Accelerometer Values
# filename:  original__154.txt
# Saving start time: Thu Feb 26 20:43:30 GMT+08:00 2015

# sensor resolution: 0.0095825195m/s^2
#Sensorvendor: KIONIX, name: KX023 Accelerometer, type: 1,version : 1, range 39.240005

# X value, Y value, Z value, time diff in ms
0.006 0.181 -0.989 10
-0.013 0.176 -1.1 9
-0.012 0.158 -0.99 8
-0.059 0.151 -0.875 9
-0.117 0.14 -0.568 8
-0.133 0.129 -0.242 8
-0.098 0.115 0.004 9
-0.055 0.103 0.144 8
-0.02 0.094 0.183 9
-0.018 0.085 0.164 8
0.015 0.081 0.134 8
0.035 0.078 0.077 7
0.024 0.079 -0.002 10
-0.013 0.096 -0.105 9
-0.053 0.105 -0.161 8
-0.047 0.095 -0.145 8
-0.051 0.071 -0.112 9
-0.037 0.04 -0.035 8
-0.066 0.031 0.057 9
-0.113 0.039 0.162 8
-0.116 0.038 0.213 8
-0.083 0.037 0.149 9
-0.074 0.033 0.134 8
-0.033 0.041 -0.03 7
0.001 0.045 -0.225 10
0.037 0.038 -0.387 8
0.056 0.027 -0.509 9
0.046 0.024 -0.55 8
0.019 0.021 -0.408 8
0.017 0.019 -0.367 9
-0.018 0.008 -0.08 8
-0.046 -0.005 0.155 9
-0.059 -0.009 0.263 8
-0.053 -0.005 0.297 8
-0.028 -0.003 0.259 9
-0.025 -0.002 0.233 7
0.007 -0.004 0.073 10
0.046 -0.004 -0.178 8
0.109 -0.004 -0.416 8
0.226 -0.012 -0.58 9
0.378 -0.051 -0.659 8
0.445 -0.088 -0.64 9
0.4 -0.079 -0.576 8
0.348 -0.096 -0.535 8
0.307 -0.141 -0.422 9
0.274 -0.2 -0.191 8
0.193 -0.168 -0.009 9
0.14 -0.089 0.076 6
0.13 -0.043 0.154 10
0.117 -0.039 0.139 9
0.083 -0.008 0.188 8
0.024 0.011 0.161 9
-0.01 0.027 0.037 8
-0.003 0.041 -0.177 8
0.006 0.037 -0.344 9
-0.044 0.023 -0.381 8
-0.039 0.021 -0.343 8
-0.127 0.021 -0.267 9
-0.198 0.032 -0.115 8
-0.232 0.043 0.051 7
-0.248 0.054 0.164 10
-0.266 0.062 0.171 8
-0.239 0.055 0.153 9
-0.263 0.065 0.069 8
-0.277 0.058 -0.066 9
-0.275 0.037 -0.188 8
-0.297 0.007 -0.18 8
-0.351 -0.048 -0.041 9
-0.411 -0.137 0.128 8
-0.37 -0.123 0.115 9
-0.444 -0.208 0.243 8
-0.547 -0.267 0.329 7
-0.641 -0.302 0.372 10
-0.672 -0.337 0.263 8
-0.683 -0.361 0.104 8
-0.836 -0.292 0.014 9
-0.752 -0.262 0.013 8
-0.997 -0.161 -0.089 9
-1.147 -0.089 -0.22 8
-1.207 -0.019 -0.316 8
-1.194 0.055 -0.339 9
-1.249 0.154 -0.285 8
-1.124 0.138 -0.257 9
-1.349 0.275 -0.145 6
-1.582 0.433 0.0 10
-1.702 0.518 0.149 9
-1.728 0.477 0.252 8
-1.738 0.404 0.293 9
-1.662 0.363 0.315 8
-1.496 0.326 0.284 8
-1.262 0.277 0.341 9
-0.9 0.212 0.433 8
-0.432 0.238 0.518 9
0.017 0.323 0.528 8
0.401 0.364 0.454 8
0.36 0.328 0.409 7
0.768 0.246 0.322 10
1.057 0.077 0.241 9
1.155 -0.052 0.159 8
1.228 -0.143 0.114 8
1.356 -0.194 0.095 9
1.501 -0.217 0.0 8
1.351 -0.195 -0.184 9
1.49 -0.216 -0.166 8
1.671 -0.27 -0.381 8
1.906 -0.371 -0.543 9
2.085 -0.501 -0.606 8
2.23 -0.661 -0.606 7
2.37 -0.806 -0.539 10
2.133 -0.725 -0.485 8
2.266 -0.85 -0.287 9
2.39 -0.983 0.068 8
2.548 -1.103 0.439 8
2.632 -1.173 0.723 9
2.568 -1.129 0.878 8
2.509 -1.06 1.013 9
2.258 -0.954 0.912 8
2.326 -0.922 1.071 8
2.473 -0.917 1.207 9
2.772 -1.042 1.464 6
3.235 -1.122 1.844 11
3.659 -0.888 2.2 8
3.982 -0.394 2.493 8
3.584 -0.354 2.243 9
3.818 0.091 2.432 8
3.881 0.437 2.448 9
3.715 0.655 2.607 8
3.22 0.601 3.257 8
2.425 0.417 4.134 9
2.183 0.376 3.72 8
1.147 0.22 4.306 9
0.041 0.09 4.405 6
-0.793 -0.177 4.083 10
-1.306 -0.525 3.404 9
-1.68 -0.872 2.676 8
-1.991 -1.258 2.218 8
-1.792 -1.132 1.996 9
-2.001 -1.546 1.819 8
-2.07 -1.892 1.615 9
-2.321 -1.791 1.208 8
-2.844 -1.394 0.685 8
-3.221 -1.099 0.148 9
-3.231 -0.903 -0.439 8
-2.908 -0.813 -0.395 7
-2.815 -0.463 -1.032 10
-2.835 0.039 -1.536 8
-2.933 0.337 -1.83 9
-2.81 0.268 -1.983 8
-2.38 -0.123 -2.108 9
-1.923 -0.553 -2.234 8
-1.731 -0.498 -2.011 8
-1.408 -0.855 -2.143 9
-1.195 -1.152 -2.284 8
-1.088 -1.307 -2.385 9
-1.017 -1.417 -2.489 8
-0.915 -1.275 -2.24 7
-0.808 -1.435 -2.459 10
-0.683 -1.496 -2.616 8
-0.581 -1.405 -2.588 8
-0.515 -1.248 -2.413 9
-0.462 -1.137 -2.173 8
-0.35 -1.07 -1.934 9
-0.176 -0.968 -1.702 8
-0.158 -0.871 -1.532 8
0.032 -0.763 -1.305 9
0.232 -0.71 -0.974 8
0.358 -0.622 -0.438 9
0.299 -0.352 0.132 6
0.124 0.104 0.515 10
0.093 0.578 0.827 9
0.083 0.52 0.745 8
0.186 0.797 1.045 9
0.167 0.858 1.222 8
0.033 0.765 1.239 8
-0.155 0.455 1.226 9
-0.341 0.107 1.284 8
-0.307 -0.107 1.296 9
-0.276 -0.096 1.166 8
-0.315 -0.237 0.99 8
-0.174 -0.269 0.662 7
-0.097 -0.089 0.519 10
-0.229 0.345 0.59 9
-0.561 0.868 0.755 8
-0.505 0.781 0.679 8
-0.837 1.145 1.002 9
-1.065 1.304 1.235 8
-1.073 1.152 1.136 8
-0.663 0.694 0.668 9
-0.014 0.131 -0.078 8
0.478 -0.144 -0.857 9
0.43 -0.129 -0.772 8
0.538 0.041 -1.427 7
0.563 0.313 -1.756 10
0.768 0.554 -1.902 8
0.939 0.882 -2.191 9
0.898 1.329 -2.549 8
0.703 1.647 -2.719 8
0.632 1.482 -2.447 9
0.498 1.548 -2.371 8
0.631 1.258 -2.042 9
0.894 0.77 -1.499 8
1.034 0.343 -0.869 8
1.081 -0.015 -0.273 9
0.973 -0.014 -0.245 6
0.988 -0.312 0.174 11
0.922 -0.454 0.34 8
0.768 -0.321 0.181 8
0.502 -0.005 -0.207 9
0.155 0.331 -0.659 8
-0.149 0.61 -1.072 8
-0.134 0.549 -0.965 9
-0.366 0.741 -1.094 8
-0.525 0.808 -0.864 9
-0.542 0.769 -0.507 8
-0.397 0.677 -0.178 8
-0.205 0.581 0.038 7
-0.024 0.511 0.069 10
-0.021 0.46 0.062 9
0.159 0.453 -0.039 8
0.192 0.513 -0.161 8
0.059 0.599 -0.235 9
-0.066 0.65 -0.279 8
-0.12 0.637 -0.331 9
-0.108 0.592 -0.343 8
-0.116 0.533 -0.309 8
-0.188 0.488 -0.27 9
-0.284 0.438 -0.187 8
-0.308 0.394 -0.015 7
-0.284 0.357 0.351 10
-0.273 0.342 0.728 8
-0.246 0.307 0.655 9
-0.28 0.329 0.758 8
-0.343 0.392 0.607 8
-0.448 0.507 0.315 9
-0.529 0.62 -0.003 8
-0.586 0.733 -0.344 9
-0.685 0.846 -0.736 8
-0.616 0.761 -0.663 8
-0.761 0.811 -0.953 9
-0.945 0.758 -1.017 7
-1.113 0.602 -0.811 10
-1.174 0.344 -0.401 8
-1.132 0.036 -0.046 8
-0.996 -0.191 0.197 9
-0.897 -0.172 0.177 8
-0.672 -0.284 0.374 9
-0.413 -0.336 0.457 8
-0.211 -0.338 0.365 8
-0.134 -0.291 0.198 9
-0.152 -0.228 0.096 8
-0.137 -0.205 0.086 9
-0.136 -0.164 0.058 6
-0.052 -0.157 0.052 10
0.096 -0.153 0.046 9
0.288 -0.153 0.04 8
0.467 -0.158 0.094 9
0.548 -0.15 0.244 8
0.493 -0.135 0.22 8
0.478 -0.107 0.371 9
0.443 -0.038 0.392 8
0.455 0.078 0.265 8
0.523 0.195 0.08 9
0.597 0.287 -0.093 8
0.537 0.259 -0.084 7
0.569 0.337 -0.254 10
0.556 0.411 -0.468 8
0.546 0.445 -0.728 9
0.52 0.403 -0.892 8
0.434 0.337 -0.798 9
0.299 0.306 -0.553 8
0.269 0.276 -0.498 8
0.121 0.323 -0.448 9
-0.015 0.411 -0.149 8
-0.133 0.47 -0.086 9
-0.223 0.486 -0.008 8
-0.261 0.472 0.074 7
-0.25 0.439 0.125 10
-0.225 0.395 0.112 8
-0.182 0.367 0.169 9
-0.2 0.436 0.215 8
-0.28 0.549 0.247 8
-0.28 0.52 0.246 9
-0.197 0.391 0.194 8
-0.086 0.285 0.115 9
-0.077 0.257 0.104 8
-0.002 0.184 0.033 8
-0.04 0.149 0.017 9
-0.169 0.153 0.068 6
-0.265 0.144 0.148 10
-0.298 0.116 0.229 9
-0.299 0.113 0.247 8
-0.269 0.101 0.222 9
-0.227 0.123 0.145 8
-0.133 0.105 -0.018 8
-0.016 0.048 -0.183 9
0.075 0.002 -0.269 8
0.104 -0.021 -0.319 9
0.093 -0.019 -0.287 8
0.061 -0.024 -0.336 8
0.001 -0.033 -0.334 7
-0.051 -0.026 -0.172 10
-0.072 -0.014 0.048 9
-0.052 -0.017 0.224 8
-0.028 -0.016 0.418 8
-0.025 -0.014 0.377 9
-0.017 -0.005 0.565 8
-0.032 0.006 0.693 9
-0.083 0.077 0.742 8
-0.12 0.194 0.631 8
-0.072 0.208 0.403 9
0.008 0.137 0.217 8
0.007 0.124 0.195 7
0.056 0.096 0.051 10
0.053 0.162 -0.116 8
-0.009 0.311 -0.308 9
-0.096 0.464 -0.511 8
-0.165 0.572 -0.701 8
# end
#Thu Feb 26 20:43:33 GMT+08:00 20156
