# Supplementary material for: Abnormal Gait Behavior Detection for Elderly Based on Enhanced Wigner-Ville Analysis and Cloud Incremental SVM Learning
Source: Hindawi journal article supplement (doi:10.1155/2016/5869238), 2016-01-01
Supplement: f1 [file 5869238.f1.zip › Supplementary Materials/Original Data/Stumbling without fall/original__155.txt]

# Accelerometer Values
# filename:  original__155.txt
# Saving start time: Thu Feb 26 20:43:37 GMT+08:00 2015

# sensor resolution: 0.0095825195m/s^2
#Sensorvendor: KIONIX, name: KX023 Accelerometer, type: 1,version : 1, range 39.240005

# X value, Y value, Z value, time diff in ms
-0.224 0.278 -0.599 8
-0.235 0.321 -0.589 8
-0.213 0.32 -0.512 9
-0.161 0.285 -0.425 8
-0.145 0.257 -0.383 9
-0.074 0.191 -0.318 8
-0.015 0.094 -0.266 8
0.032 0.0 -0.228 9
0.065 -0.078 -0.193 8
0.079 -0.13 -0.151 9
0.071 -0.117 -0.136 6
0.07 -0.138 -0.103 10
0.058 -0.14 -0.07 9
0.047 -0.143 -0.03 8
0.04 -0.135 -0.038 8
0.011 -0.078 -0.062 9
-0.048 0.003 -0.066 8
-0.044 0.003 -0.059 9
-0.089 0.064 -0.07 8
-0.078 0.073 -0.081 8
-0.039 0.038 -0.079 9
-0.019 0.03 -0.07 8
-0.013 0.035 -0.063 7
0.0 0.015 -0.06 10
0.0 0.013 -0.054 8
0.025 -0.012 -0.055 9
0.047 -0.019 -0.055 8
0.078 -0.03 -0.045 9
0.112 -0.056 -0.026 8
0.123 -0.066 -0.002 8
0.103 -0.027 0.044 9
0.093 -0.024 0.039 8
0.058 0.022 0.119 9
0.038 0.024 0.201 8
0.037 -0.003 0.262 7
0.031 -0.027 0.288 10
0.019 -0.036 0.326 8
0.03 -0.066 0.388 9
0.027 -0.059 0.349 8
0.055 -0.109 0.365 8
0.071 -0.132 0.292 9
0.062 -0.099 0.141 8
0.044 -0.035 -0.007 9
0.032 0.0 -0.09 8
0.029 0.0 -0.081 8
0.03 0.009 -0.132 9
0.034 0.017 -0.178 6
0.038 0.017 -0.202 10
0.038 0.01 -0.192 9
0.038 0.0 -0.151 8
0.034 -0.026 -0.115 9
0.031 -0.023 -0.104 8
0.026 -0.052 -0.094 8
0.024 -0.063 -0.104 9
0.025 -0.061 -0.114 8
0.032 -0.073 -0.12 9
0.059 -0.092 -0.132 8
0.089 -0.105 -0.138 8
0.08 -0.095 -0.124 7
0.096 -0.115 -0.131 10
0.114 -0.137 -0.132 9
0.122 -0.157 -0.122 8
0.116 -0.182 -0.114 8
0.096 -0.207 -0.102 9
0.086 -0.186 -0.092 8
0.063 -0.204 -0.078 9
0.054 -0.225 -0.07 8
0.061 -0.242 -0.066 8
0.071 -0.254 -0.063 9
0.065 -0.27 -0.057 8
0.059 -0.243 -0.052 7
0.059 -0.253 -0.046 10
0.089 -0.256 -0.071 8
0.122 -0.248 -0.13 9
0.131 -0.231 -0.18 8
0.115 -0.215 -0.171 8
0.1 -0.196 -0.133 9
0.1 -0.182 -0.088 8
0.09 -0.163 -0.079 9
0.09 -0.157 -0.031 8
0.067 -0.143 0.004 8
0.015 -0.124 0.02 9
-0.019 -0.114 -0.001 7
-0.008 -0.116 -0.05 10
-0.007 -0.104 -0.045 8
0.039 -0.111 -0.098 8
0.103 -0.134 -0.091 9
0.181 -0.191 -0.013 8
0.244 -0.258 0.059 9
0.252 -0.311 0.098 8
0.205 -0.36 0.148 8
0.185 -0.324 0.134 9
0.097 -0.364 0.23 8
-0.014 -0.371 0.292 9
-0.152 -0.373 0.28 6
-0.275 -0.41 0.242 10
-0.375 -0.482 0.162 9
-0.512 -0.568 0.067 8
-0.46 -0.511 0.06 9
-0.67 -0.579 0.023 8
-0.883 -0.601 0.106 8
-1.006 -0.586 0.307 9
-1.099 -0.551 0.49 8
-1.211 -0.506 0.509 8
-1.09 -0.455 0.458 9
-1.235 -0.406 0.371 8
-1.382 -0.319 0.207 7
-1.494 -0.255 -0.083 10
-1.667 -0.245 -0.341 8
-1.928 -0.232 -0.401 9
-2.166 -0.211 -0.257 8
-1.95 -0.19 -0.231 9
-2.182 -0.025 0.042 8
-2.463 0.443 0.302 8
-2.663 0.974 0.48 9
-2.502 1.326 0.613 8
-2.057 1.517 0.663 9
-1.466 1.558 0.598 8
-1.32 1.403 0.538 7
-0.591 1.388 0.383 10
0.127 1.331 0.231 8
0.808 1.159 0.222 9
1.459 0.818 0.313 8
2.098 0.232 0.42 8
2.418 -0.183 0.45 9
2.176 -0.165 0.405 8
2.103 -0.311 0.407 8
2.057 -0.56 0.485 9
2.199 -0.924 0.708 8
2.426 -1.346 1.136 9
2.183 -1.211 1.022 6
2.357 -1.565 1.471 10
2.503 -1.922 1.757 9
2.79 -2.263 1.822 8
3.163 -2.467 1.683 9
3.452 -2.636 1.377 8
3.62 -2.845 0.987 8
3.677 -3.091 0.675 9
3.309 -2.782 0.607 8
3.238 -3.051 0.678 9
2.932 -3.293 1.385 8
2.417 -3.4 2.6 8
1.794 -3.379 4.044 7
1.194 -3.112 5.241 10
0.594 -2.553 5.636 9
0.535 -2.298 5.072 8
0.1 -1.683 4.572 8
-0.035 -0.925 3.509 9
-0.115 0.028 2.336 8
-0.452 0.973 1.196 8
-1.079 1.694 0.522 9
-0.971 1.524 0.47 8
-1.618 1.829 0.635 9
-2.042 1.729 1.344 8
-2.169 1.445 2.229 7
-2.1 1.209 2.997 10
-1.927 1.027 3.257 8
-1.643 0.779 2.808 9
-1.479 0.701 2.527 8
-1.077 0.419 1.74 8
-0.609 0.154 1.174 9
-0.281 0.017 0.972 8
0.005 -0.19 0.958 9
0.385 -0.592 0.911 8
0.616 -0.828 0.601 8
0.555 -0.745 0.541 9
0.341 -0.551 -0.015 6
-0.239 -0.199 -0.734 11
-0.873 -0.005 -1.521 8
-1.412 0.062 -2.242 8
-1.819 0.081 -2.868 9
-2.017 0.064 -3.338 8
-1.815 0.058 -3.004 9
-1.867 -0.064 -3.383 8
-1.874 -0.234 -3.721 8
-1.802 -0.269 -4.015 9
-1.683 -0.163 -4.357 8
-1.583 -0.026 -4.613 8
-1.425 -0.023 -4.151 7
-1.356 0.123 -4.248 10
-1.262 0.296 -4.239 9
-1.125 0.379 -4.127 8
-0.95 0.362 -3.822 8
-0.782 0.386 -3.445 9
-0.73 0.387 -3.215 8
-0.657 0.348 -2.894 9
-0.775 0.375 -2.713 8
-1.01 0.331 -2.257 8
-1.14 0.083 -1.409 9
-1.026 -0.246 -0.371 8
-0.924 -0.221 -0.334 7
-0.593 -0.879 1.381 10
-0.534 -0.791 1.243 8
-0.377 -0.939 1.657 9
-0.27 -1.087 1.754 8
-0.174 -1.106 1.66 9
-0.083 -0.857 1.488 8
0.037 -0.363 1.233 8
0.033 -0.327 1.109 9
0.206 0.154 0.882 8
0.398 0.383 0.633 8
0.579 0.601 0.367 9
0.676 0.95 0.173 7
0.671 1.182 -0.076 10
0.639 1.224 -0.335 8
0.575 1.102 -0.302 8
0.52 1.085 -0.413 9
0.447 1.04 -0.504 8
0.317 0.971 -0.628 9
0.112 0.882 -0.563 8
-0.125 0.825 -0.195 8
-0.303 0.738 0.382 9
-0.273 0.664 0.344 8
-0.34 0.548 0.981 9
-0.225 0.399 1.443 6
0.166 0.171 1.561 10
0.645 0.032 1.348 9
0.984 0.071 0.968 8
0.886 0.064 0.871 9
1.047 0.167 0.54 8
1.074 0.242 0.263 8
1.067 0.257 0.01 9
1.128 0.133 -0.19 8
1.17 0.01 -0.345 9
1.026 0.065 -0.453 8
0.924 0.058 -0.408 8
0.667 0.184 -0.465 7
0.431 0.248 -0.455 10
0.302 0.205 -0.454 8
0.294 0.097 -0.548 9
0.315 -0.022 -0.694 8
0.303 -0.107 -0.792 9
0.273 -0.097 -0.713 8
0.247 -0.09 -0.782 8
0.21 0.013 -0.859 9
0.158 0.129 -0.927 8
0.086 0.205 -0.99 9
-0.006 0.285 -1.062 8
-0.005 0.256 -0.955 7
-0.1 0.384 -1.032 10
-0.164 0.539 -1.06 8
-0.168 0.682 -1.056 9
-0.134 0.791 -1.077 8
-0.091 0.833 -1.073 8
-0.053 0.816 -0.924 9
-0.047 0.734 -0.832 8
-0.036 0.696 -0.567 9
-0.044 0.661 -0.28 8
-0.011 0.632 -0.073 8
0.082 0.594 0.011 9
0.197 0.573 0.028 6
0.298 0.548 0.039 11
0.268 0.494 0.035 8
0.357 0.496 0.04 8
0.457 0.559 -0.021 9
0.595 0.585 -0.171 8
0.758 0.547 -0.258 8
0.882 0.526 -0.159 9
0.887 0.56 -0.002 8
0.798 0.504 -0.002 9
0.722 0.607 0.089 8
0.663 0.699 0.12 8
0.612 0.734 0.086 7
0.512 0.744 -0.041 10
0.436 0.726 -0.303 9
0.392 0.653 -0.273 8
0.377 0.616 -0.577 8
0.334 0.574 -0.753 9
0.21 0.554 -0.81 8
0.045 0.549 -0.805 9
-0.085 0.523 -0.74 8
-0.188 0.488 -0.646 8
-0.169 0.439 -0.581 9
-0.263 0.411 -0.488 8
-0.325 0.373 -0.418 7
-0.329 0.334 -0.382 10
-0.289 0.313 -0.361 8
-0.231 0.298 -0.336 9
-0.161 0.283 -0.313 8
-0.145 0.255 -0.282 8
-0.065 0.264 -0.274 9
0.025 0.264 -0.261 8
0.098 0.227 -0.19 9
0.099 0.211 -0.008 8
0.041 0.268 0.208 8
0.037 0.349 0.344 9
0.033 0.314 0.31 7
-0.028 0.365 0.382 10
-0.039 0.396 0.305 8
-0.108 0.434 0.134 8
-0.162 0.467 -0.014 9
-0.161 0.467 -0.035 8
-0.145 0.42 -0.031 9
-0.099 0.393 0.105 8
-0.034 0.365 0.205 8
0.014 0.364 0.164 9
-0.01 0.396 0.004 8
-0.07 0.435 -0.164 9
-0.063 0.391 -0.147 6
-0.106 0.395 -0.231 10
-0.118 0.338 -0.187 9
-0.108 0.241 -0.046 8
-0.076 0.127 0.068 9
-0.025 0.01 0.138 8
0.002 -0.118 0.208 8
0.002 -0.21 0.229 9
0.002 -0.189 0.206 8
0.013 -0.246 0.191 9
0.05 -0.321 0.23 8
0.067 -0.358 0.281 8
0.042 -0.288 0.269 7
-0.002 -0.167 0.238 10
-0.002 -0.15 0.214 8
-0.047 -0.026 0.208 9
-0.05 0.081 0.182 8
0.003 0.128 0.135 9
0.078 0.124 0.004 8
0.152 0.08 -0.216 8
0.179 0.023 -0.38 9
0.161 0.021 -0.342 8
0.117 -0.007 -0.44 9
0.008 -0.032 -0.47 8
-0.137 -0.083 -0.415 7
-0.275 -0.132 -0.289 10
-0.341 -0.147 -0.162 8
-0.332 -0.158 -0.066 9
-0.299 -0.143 -0.059 8
-0.258 -0.185 -0.001 8
-0.205 -0.238 0.031 9
-0.173 -0.294 0.045 8
-0.175 -0.305 0.015 9
-0.226 -0.263 0.029 8
-0.204 -0.237 0.026 8
-0.308 -0.142 0.173 9
-0.408 -0.022 0.387 6
-0.413 0.033 0.564 10
-0.302 0.059 0.673 9
-0.095 0.04 0.703 8
0.136 0.024 0.685 9
0.122 0.022 0.616 8
0.307 0.099 0.557 8
0.447 0.194 0.394 9
0.542 0.255 0.176 8
0.571 0.295 0.02 9
0.571 0.312 -0.112 8
0.524 0.31 -0.258 8
0.471 0.279 -0.232 7
0.323 0.297 -0.273 10
0.129 0.309 -0.216 9
-0.028 0.292 -0.219 8
-0.132 0.239 -0.267 8
-0.203 0.196 -0.239 9
-0.183 0.176 -0.215 8
-0.234 0.179 -0.194 9
-0.247 0.174 -0.058 8
-0.231 0.153 -0.145 8
-0.199 0.123 -0.26 9
-0.164 0.08 -0.341 8
-0.148 0.072 -0.307 7
-0.124 0.038 -0.364 10
-0.096 0.007 -0.385 8
-0.055 -0.05 -0.351 9
-0.019 -0.145 -0.176 8
-0.017 -0.22 0.077 8
-0.036 -0.232 0.24 9
-0.052 -0.196 0.287 8
-0.046 -0.176 0.259 9
-0.053 -0.109 0.235 8
-0.055 -0.028 0.165 8
-0.055 0.031 0.049 9
-0.063 0.071 -0.071 7
-0.062 0.084 -0.177 10
-0.056 0.076 -0.159 8
-0.035 0.053 -0.256 8
-0.008 0.028 -0.318 9
0.008 0.026 -0.327 8
-0.003 0.039 -0.305 9
-0.042 0.083 -0.283 8
-0.086 0.174 -0.267 8
-0.078 0.157 -0.24 9
-0.097 0.233 -0.244 8
-0.098 0.26 -0.246 9
-0.079 0.264 -0.235 6
-0.042 0.238 -0.263 10
-0.021 0.204 -0.282 9
-0.014 0.167 -0.218 8
-0.013 0.151 -0.196 9
-0.007 0.102 -0.087 8
-0.005 0.063 0.108 8
-0.012 0.037 0.344 9
-0.025 0.02 0.508 8
-0.052 0.028 0.609 8
-0.046 0.053 0.624 9
-0.042 0.048 0.562 8
-0.09 0.061 0.451 7
-0.084 0.076 0.216 10
-0.063 0.08 -0.041 8
-0.029 0.07 -0.206 9
-0.003 0.054 -0.27 8
-0.003 0.049 -0.243 9
0.012 0.021 -0.239 8
0.02 -0.003 -0.22 8
0.018 -0.016 -0.226 9
0.022 -0.012 -0.228 8
0.028 -0.004 -0.22 9
0.031 -0.002 -0.228 8
0.027 -0.002 -0.205 7
0.015 0.022 -0.24 10
-0.017 0.07 -0.278 8
-0.032 0.102 -0.286 9
-0.026 0.099 -0.224 8
-0.029 0.095 -0.082 8
-0.101 0.102 0.2 9
-0.091 0.092 0.18 8
-0.199 0.086 0.541 8
-0.2 0.031 0.769 9
-0.094 -0.054 0.779 8
0.023 -0.131 0.568 9
0.02 -0.118 0.511 6
0.093 -0.137 0.148 10
# end
#Thu Feb 26 20:43:41 GMT+08:00 2015 
