# Supplementary material for: Abnormal Gait Behavior Detection for Elderly Based on Enhanced Wigner-Ville Analysis and Cloud Incremental SVM Learning
Source: Hindawi journal article supplement (doi:10.1155/2016/5869238), 2016-01-01
Supplement: f1 [file 5869238.f1.zip › Supplementary Materials/Original Data/Stumbling without fall/original__156.txt]

# Accelerometer Values
# filename:  original__156.txt
# Saving start time: Thu Feb 26 20:43:46 GMT+08:00 2015

# sensor resolution: 0.0095825195m/s^2
#Sensorvendor: KIONIX, name: KX023 Accelerometer, type: 1,version : 1, range 39.240005

# X value, Y value, Z value, time diff in ms
-0.019 0.078 -0.022 8
-0.011 0.073 -0.055 8
-0.003 0.075 -0.115 7
-0.002 0.084 -0.193 10
-0.002 0.076 -0.173 9
-0.003 0.084 -0.236 8
-0.002 0.086 -0.242 8
0.01 0.083 -0.186 9
0.037 0.072 -0.093 8
0.061 0.05 -0.022 8
0.069 0.036 -0.006 9
0.062 0.032 -0.005 8
0.058 0.01 -0.034 9
0.047 -0.021 -0.084 8
0.021 -0.034 -0.098 7
-0.02 -0.022 -0.04 10
-0.051 -0.019 0.047 8
-0.046 -0.017 0.042 9
-0.049 -0.042 0.101 8
-0.025 -0.082 0.128 8
0.005 -0.108 0.134 9
0.011 -0.096 0.122 8
-0.001 -0.065 0.103 9
-0.006 -0.051 0.074 8
-0.006 -0.046 0.067 8
-0.003 -0.053 0.035 9
-0.008 -0.051 0.013 6
-0.024 -0.022 0.006 11
-0.039 0.006 0.011 8
-0.04 0.025 0.002 8
-0.033 0.042 -0.029 9
-0.03 0.038 -0.026 8
-0.035 0.056 -0.057 9
-0.05 0.065 -0.061 8
-0.05 0.042 -0.049 8
-0.032 -0.003 -0.024 9
-0.018 -0.051 0.011 8
-0.016 -0.046 0.01 8
-0.007 -0.082 0.038 7
0.014 -0.124 0.048 10
0.035 -0.151 0.039 9
0.048 -0.149 0.013 8
0.055 -0.147 -0.02 8
0.051 -0.138 -0.052 9
0.046 -0.124 -0.047 8
0.032 -0.11 -0.039 9
0.021 -0.117 -0.002 8
0.023 -0.134 0.025 8
0.03 -0.126 0.034 9
0.024 -0.108 0.032 8
0.022 -0.097 0.029 7
0.015 -0.088 0.012 10
0.021 -0.075 -0.028 8
0.045 -0.08 -0.057 9
0.091 -0.105 -0.046 8
0.111 -0.128 -0.023 9
0.082 -0.13 -0.001 8
0.073 -0.117 -0.001 8
0.029 -0.104 0.027 9
-0.007 -0.091 0.047 8
-0.027 -0.071 0.054 8
-0.02 -0.06 0.037 9
0.0 -0.075 -0.023 7
0.01 -0.081 -0.114 10
0.009 -0.073 -0.103 8
0.02 -0.048 -0.201 8
0.061 -0.029 -0.267 9
0.136 -0.037 -0.257 8
0.194 -0.066 -0.153 9
0.206 -0.117 -0.009 8
0.175 -0.161 0.095 8
0.157 -0.145 0.085 9
0.097 -0.162 0.133 8
0.039 -0.167 0.14 9
-0.008 -0.173 0.113 6
-0.025 -0.18 0.059 10
0.007 -0.23 0.01 9
0.006 -0.207 0.009 8
0.068 -0.307 -0.007 9
0.116 -0.394 -0.002 8
0.133 -0.435 0.03 8
0.12 -0.45 0.08 9
0.088 -0.487 0.118 8
0.04 -0.573 0.143 9
0.036 -0.515 0.128 8
-0.025 -0.633 0.131 8
-0.074 -0.768 0.104 7
-0.108 -0.904 0.052 10
-0.142 -0.984 -0.088 8
-0.149 -0.965 -0.283 9
-0.133 -0.839 -0.461 8
-0.12 -0.755 -0.415 9
-0.139 -0.585 -0.593 8
-0.215 -0.429 -0.699 8
-0.364 -0.333 -0.648 9
-0.588 -0.317 -0.401 8
-0.807 -0.341 -0.022 9
-0.727 -0.358 0.412 8
-0.9 -0.322 0.37 7
-1.055 -0.323 0.776 10
-1.197 -0.313 0.996 8
-1.32 -0.26 1.025 9
-1.392 -0.147 0.921 8
-1.502 0.077 0.771 8
-1.352 0.069 0.694 9
-1.613 0.332 0.642 8
-1.901 0.588 0.684 9
-2.122 0.954 0.73 8
-2.143 1.27 0.71 8
-2.044 1.574 0.555 9
-1.84 1.416 0.499 6
-1.728 1.801 0.187 11
-1.358 1.983 -0.036 8
-0.692 2.008 -0.088 8
0.04 1.979 -0.054 9
0.705 1.829 0.063 8
1.315 1.58 0.161 8
1.853 1.234 0.168 9
1.668 1.11 0.152 8
2.089 0.731 0.06 9
2.35 0.357 -0.165 8
2.497 0.01 -0.46 8
2.572 -0.322 -0.69 7
2.506 -0.7 -0.649 10
2.256 -0.63 -0.584 9
2.01 -0.997 -0.158 8
1.727 -1.399 0.363 8
1.624 -1.882 0.699 9
1.741 -2.315 0.789 8
2.092 -2.765 0.65 9
2.644 -3.304 0.339 8
2.379 -2.973 0.305 8
3.037 -3.37 -0.052 9
3.667 -3.427 -0.301 8
4.105 -3.259 -0.416 7
4.228 -2.978 -0.299 10
4.158 -2.602 0.219 8
3.914 -2.296 1.22 9
3.522 -2.067 1.098 8
3.132 -1.957 2.521 8
2.54 -1.917 4.027 9
1.703 -1.545 5.238 8
0.82 -0.501 5.854 9
0.008 0.727 5.817 8
0.007 0.654 5.236 8
-0.591 1.503 4.872 9
-0.851 2.003 4.335 7
-0.727 2.163 3.892 10
-0.226 1.993 3.809 8
0.23 1.576 3.866 8
0.396 0.975 3.929 9
0.356 0.877 3.536 8
0.481 0.143 3.44 9
0.4 -0.523 2.894 8
0.154 -0.987 2.209 8
0.044 -1.44 1.573 9
0.015 -1.843 1.001 8
0.017 -2.102 0.602 9
0.015 -1.891 0.542 6
-0.005 -1.935 0.222 10
-0.183 -1.777 -0.17 9
-0.523 -1.58 -0.536 8
-0.894 -1.452 -0.889 9
-1.282 -1.455 -1.32 8
-1.153 -1.31 -1.188 8
-1.472 -1.394 -1.433 9
-1.752 -1.504 -1.284 8
-2.062 -1.582 -0.946 8
-2.343 -1.558 -0.805 9
-2.569 -1.441 -1.016 8
-2.312 -1.297 -0.915 7
-2.447 -1.092 -1.461 10
-2.509 -0.855 -2.243 8
-2.62 -0.643 -3.177 9
-2.686 -0.408 -4.136 8
-2.791 -0.126 -4.703 9
-2.984 0.201 -4.516 8
-3.069 0.455 -3.805 8
-2.762 0.409 -3.424 9
-2.673 0.436 -2.669 8
-2.35 0.237 -1.886 9
-1.82 -0.051 -1.196 8
-1.278 -0.279 -0.766 7
-0.941 -0.413 -0.507 10
-0.847 -0.371 -0.456 8
-0.668 -0.387 -0.369 9
-0.587 -0.243 -0.453 8
-0.529 -0.033 -0.562 8
-0.441 0.122 -0.538 9
-0.241 0.258 -0.274 8
0.101 0.498 0.041 8
0.091 0.448 0.037 9
0.501 0.738 0.221 8
0.981 0.922 0.304 9
1.423 0.944 0.406 6
1.703 0.844 0.571 10
1.815 0.768 0.6 9
1.768 0.764 0.405 8
1.591 0.687 0.364 9
1.485 0.674 -0.001 8
1.469 0.625 -0.414 8
1.487 0.647 -0.765 9
1.318 0.808 -1.036 8
1.066 0.904 -1.036 9
0.959 0.814 -0.932 8
0.724 0.851 -0.783 8
0.378 0.865 -0.528 7
0.124 0.625 -0.139 10
0.049 0.291 0.124 9
-0.024 0.106 0.218 8
-0.115 0.04 0.166 8
-0.104 0.036 0.15 9
-0.349 0.257 -0.059 8
-0.732 0.679 -0.379 9
-0.977 0.952 -0.706 8
-1.008 1.033 -0.961 8
-0.903 1.035 -1.106 9
-0.737 1.072 -1.143 8
-0.663 0.965 -1.029 7
-0.459 1.009 -1.026 10
-0.206 0.878 -1.009 8
0.096 0.581 -0.967 9
0.392 0.179 -0.848 8
0.599 -0.193 -0.669 8
0.539 -0.174 -0.602 9
0.528 -0.322 -0.468 8
0.342 -0.262 -0.405 9
0.183 -0.156 -0.403 8
0.115 -0.103 -0.531 8
0.086 -0.055 -0.832 9
0.078 -0.049 -0.749 6
-0.038 0.07 -1.024 11
-0.217 0.188 -1.099 8
-0.329 0.248 -1.032 8
-0.354 0.308 -0.952 9
-0.375 0.396 -0.898 8
-0.456 0.607 -0.837 9
-0.587 0.858 -0.728 8
-0.528 0.772 -0.655 8
-0.651 0.909 -0.528 9
-0.687 0.965 -0.485 8
-0.643 0.972 -0.492 9
-0.549 0.887 -0.419 6
-0.432 0.752 -0.152 10
-0.389 0.677 -0.137 9
-0.32 0.584 0.201 8
-0.289 0.554 0.422 8
-0.276 0.613 0.521 9
-0.275 0.742 0.487 8
-0.268 0.821 0.373 9
-0.284 0.873 0.266 8
-0.256 0.786 0.239 8
-0.339 0.857 0.092 9
-0.462 0.851 -0.026 8
-0.623 0.781 0.018 7
-0.75 0.626 0.21 10
-0.778 0.403 0.51 8
-0.743 0.228 0.896 9
-0.669 0.205 0.807 8
-0.623 0.142 1.27 9
-0.56 0.192 1.643 8
-0.338 0.174 1.78 8
0.065 -0.01 1.724 9
0.441 -0.182 1.521 8
0.396 -0.164 1.369 8
0.625 -0.227 1.09 9
0.701 -0.235 0.791 7
0.661 -0.221 0.518 10
0.578 -0.134 0.274 8
0.519 0.005 0.038 8
0.511 0.127 -0.207 9
0.46 0.114 -0.187 8
0.475 0.238 -0.434 9
0.458 0.403 -0.614 8
0.412 0.538 -0.723 8
0.384 0.581 -0.851 9
0.401 0.571 -0.987 8
0.483 0.526 -1.04 9
0.435 0.474 -0.936 6
0.5 0.431 -0.958 10
0.438 0.453 -1.018 9
0.336 0.538 -1.08 8
0.325 0.553 -1.098 9
0.395 0.462 -1.076 8
0.355 0.416 -0.968 8
0.412 0.307 -0.944 9
0.415 0.224 -0.894 8
0.357 0.173 -0.804 9
0.267 0.155 -0.735 8
0.199 0.186 -0.711 8
0.179 0.167 -0.64 7
0.13 0.189 -0.611 10
-0.017 0.207 -0.516 9
-0.264 0.294 -0.31 8
-0.455 0.356 -0.03 8
-0.513 0.308 0.186 9
-0.45 0.185 0.272 8
-0.281 0.049 0.285 8
-0.253 0.044 0.256 9
-0.07 -0.051 0.242 8
0.023 -0.091 0.245 9
0.033 -0.098 0.328 8
-0.005 -0.09 0.42 7
-0.099 -0.074 0.441 10
-0.089 -0.066 0.397 8
-0.223 -0.02 0.384 9
-0.351 0.059 0.377 8
-0.425 0.105 0.309 8
-0.431 0.144 0.149 9
-0.417 0.243 -0.017 8
-0.405 0.353 -0.147 9
-0.365 0.317 -0.132 8
-0.359 0.39 -0.152 8
-0.345 0.431 -0.078 9
-0.316 0.467 -0.012 6
-0.276 0.487 0.029 11
-0.234 0.482 0.057 8
-0.186 0.481 0.053 8
-0.167 0.433 0.048 9
-0.102 0.402 -0.011 8
-0.041 0.352 -0.176 9
-0.012 0.344 -0.383 8
0.008 0.324 -0.512 8
0.006 0.274 -0.551 9
0.005 0.246 -0.496 8
-0.075 0.229 -0.46 8
-0.134 0.157 -0.405 7
-0.085 0.035 -0.233 10
0.003 -0.121 0.058 9
0.079 -0.313 0.363 8
0.096 -0.426 0.66 8
0.086 -0.383 0.594 9
0.042 -0.379 0.78 8
-0.027 -0.266 0.821 9
-0.095 -0.125 0.751 8
-0.11 -0.012 0.637 8
-0.041 0.035 0.482 9
0.056 0.07 0.274 8
# end
#Thu Feb 26 20:43:48 GMT+08:00 20154
