# Supplementary material for: Abnormal Gait Behavior Detection for Elderly Based on Enhanced Wigner-Ville Analysis and Cloud Incremental SVM Learning
Source: Hindawi journal article supplement (doi:10.1155/2016/5869238), 2016-01-01
Supplement: f1 [file 5869238.f1.zip › Supplementary Materials/Original Data/Stumbling without fall/original__157.txt]

# Accelerometer Values
# filename:  original__157.txt
# Saving start time: Thu Feb 26 20:43:52 GMT+08:00 2015

# sensor resolution: 0.0095825195m/s^2
#Sensorvendor: KIONIX, name: KX023 Accelerometer, type: 1,version : 1, range 39.240005

# X value, Y value, Z value, time diff in ms
0.006 -0.041 -0.031 8
0.006 -0.036 -0.028 9
-0.02 0.011 -0.104 6
-0.06 0.078 -0.22 10
-0.07 0.122 -0.343 9
-0.046 0.14 -0.397 8
-0.01 0.138 -0.4 8
0.001 0.12 -0.377 9
0.001 0.108 -0.34 8
-0.009 0.076 -0.251 9
-0.02 0.028 -0.11 8
-0.029 -0.036 0.009 8
-0.026 -0.092 0.078 9
-0.015 -0.147 0.098 8
-0.013 -0.132 0.088 7
-0.004 -0.158 0.08 10
0.007 -0.16 0.067 8
0.025 -0.17 0.039 9
0.035 -0.173 -0.034 8
0.037 -0.171 -0.133 9
0.029 -0.177 -0.195 8
0.012 -0.164 -0.209 8
0.011 -0.147 -0.188 9
0.001 -0.108 -0.14 8
0.005 -0.077 -0.04 9
0.023 -0.068 0.04 8
0.041 -0.076 0.074 7
0.045 -0.095 0.082 10
0.041 -0.086 0.074 8
0.049 -0.123 0.085 8
0.057 -0.179 0.088 9
0.054 -0.248 0.069 8
0.059 -0.318 0.024 9
0.089 -0.38 -0.034 8
0.125 -0.421 -0.053 8
0.113 -0.379 -0.048 9
0.135 -0.395 -0.008 8
0.125 -0.369 0.048 9
0.089 -0.3 0.094 6
0.055 -0.241 0.121 10
0.027 -0.196 0.127 9
-0.004 -0.175 0.13 8
-0.004 -0.158 0.117 9
-0.042 -0.185 0.116 8
-0.055 -0.236 0.109 8
-0.032 -0.277 0.11 9
-0.021 -0.293 0.125 8
-0.043 -0.286 0.135 9
-0.039 -0.257 0.121 8
-0.061 -0.233 0.108 8
-0.071 -0.208 0.099 7
-0.07 -0.191 0.114 10
-0.052 -0.17 0.146 9
-0.043 -0.152 0.19 8
-0.058 -0.142 0.285 8
-0.052 -0.128 0.257 9
-0.007 -0.135 0.386 8
0.089 -0.147 0.475 8
0.152 -0.153 0.496 9
0.178 -0.157 0.436 8
0.12 -0.144 0.325 9
0.009 -0.108 0.222 8
0.008 -0.097 0.199 7
-0.075 -0.027 0.137 10
-0.079 0.042 0.073 8
0.009 0.059 -0.049 9
0.091 0.031 -0.127 8
0.087 -0.007 -0.037 8
0.029 -0.043 0.137 9
0.026 -0.038 0.123 8
-0.045 -0.067 0.259 9
-0.123 -0.086 0.333 8
-0.205 -0.091 0.349 8
-0.298 -0.092 0.305 9
-0.268 -0.082 0.274 6
-0.401 -0.082 0.25 11
-0.547 -0.083 0.24 8
-0.706 -0.102 0.181 8
-0.847 -0.118 0.072 9
-0.911 -0.159 -0.029 8
-0.917 -0.268 -0.063 9
-1.001 -0.377 -0.017 8
-0.901 -0.339 -0.015 8
-1.092 -0.412 0.115 9
-1.256 -0.459 0.263 8
-1.338 -0.416 0.357 8
-1.329 -0.279 0.404 7
-1.325 -0.053 0.36 10
-1.51 0.433 0.123 9
-1.359 0.39 0.111 8
-1.633 0.968 -0.24 8
-1.723 1.329 -0.442 9
-1.669 1.563 -0.319 8
-1.516 1.728 -0.04 9
-1.128 1.79 0.108 8
-1.015 1.611 0.097 8
-0.456 1.669 0.002 9
0.145 1.822 -0.254 8
0.651 2.009 -0.542 7
0.947 2.264 -0.861 10
1.138 2.479 -1.175 8
1.357 2.385 -1.483 9
1.221 2.147 -1.334 8
1.514 1.697 -1.636 9
1.743 0.943 -1.781 8
1.875 0.06 -1.637 8
1.906 -0.838 -1.223 9
1.846 -1.682 -0.718 8
1.798 -2.405 -0.279 8
1.618 -2.164 -0.251 9
1.756 -2.856 -0.016 7
2.044 -3.522 -0.07 10
2.429 -4.05 -0.242 8
2.882 -4.465 -0.323 8
3.3 -4.864 -0.289 9
2.97 -4.377 -0.26 8
3.358 -4.719 -0.049 9
3.541 -4.828 0.303 8
3.421 -4.619 0.772 8
3.022 -4.06 1.269 9
2.393 -3.295 1.811 8
1.596 -2.452 2.62 9
1.436 -2.207 2.358 6
0.564 -1.33 3.382 10
-0.112 -0.549 4.278 9
-0.357 0.009 4.881 8
-0.006 0.51 5.41 9
0.624 0.991 5.984 8
0.916 1.244 6.273 8
0.825 1.12 5.645 9
0.606 1.259 5.696 8
0.0 1.552 5.768 9
-0.661 1.97 5.726 8
-1.043 2.35 5.341 8
-0.939 2.115 4.807 7
-1.051 2.287 3.802 10
-0.946 2.059 3.422 8
-0.931 1.741 2.775 9
-0.825 1.299 2.295 8
-0.646 0.812 1.804 9
-0.548 0.479 1.244 8
-0.494 0.157 0.726 8
-0.445 0.141 0.653 9
-0.367 -0.25 0.243 8
-0.337 -0.555 -0.042 9
-0.431 -0.797 -0.345 8
-0.72 -0.953 -0.712 7
-1.133 -1.08 -0.952 10
-1.417 -1.271 -1.053 8
-1.275 -1.144 -0.948 9
-1.272 -1.44 -1.043 8
-1.126 -1.774 -1.035 8
-1.044 -1.956 -0.99 9
-0.911 -2.115 -1.172 8
-0.659 -2.268 -1.673 9
-0.577 -2.18 -2.477 8
-0.519 -1.962 -2.229 8
-0.835 -1.64 -3.039 9
-1.335 -1.194 -3.431 6
-1.756 -0.71 -3.433 11
-2.027 -0.347 -3.339 8
-1.972 -0.277 -3.286 8
-1.775 -0.249 -2.957 9
-1.517 -0.254 -2.973 8
-1.443 -0.11 -3.021 8
-1.551 0.083 -3.062 9
-1.636 0.165 -2.987 8
-1.604 0.089 -2.819 9
-1.518 0.104 -2.72 8
-1.366 0.094 -2.448 8
-1.282 0.19 -2.259 7
-1.128 0.17 -1.789 10
-0.947 0.148 -1.102 9
-0.684 0.098 -0.285 8
-0.293 -0.12 0.464 8
0.17 -0.388 1.05 9
0.153 -0.349 0.945 8
0.524 -0.428 1.215 9
0.623 -0.273 1.158 8
0.456 -0.023 1.054 8
0.166 0.212 0.992 9
-0.147 0.388 0.831 8
-0.133 0.349 0.748 7
-0.28 0.393 0.51 10
-0.17 0.343 0.332 8
-0.039 0.382 0.207 9
0.09 0.435 0.113 8
0.38 0.379 -0.105 8
0.742 0.287 -0.564 9
0.668 0.258 -0.508 8
0.9 0.223 -0.892 9
0.915 0.263 -0.853 8
0.638 0.399 -0.494 8
0.177 0.661 -0.07 9
-0.249 0.882 0.326 7
-0.553 0.95 0.652 10
-0.498 0.855 0.587 8
-0.571 0.839 0.761 8
-0.429 0.787 0.687 9
-0.274 0.732 0.428 8
-0.121 0.655 0.072 9
0.136 0.469 -0.386 8
0.411 0.221 -0.832 8
0.37 0.199 -0.749 9
0.538 -0.001 -0.973 8
0.59 -0.172 -0.923 9
0.596 -0.343 -0.743 6
0.601 -0.467 -0.537 10
0.59 -0.503 -0.39 9
0.531 -0.453 -0.351 8
0.556 -0.413 -0.361 9
0.613 -0.296 -0.606 8
0.656 -0.132 -1.046 8
0.683 0.012 -1.527 9
0.674 0.113 -1.833 8
0.612 0.253 -1.902 8
0.551 0.227 -1.712 9
0.424 0.409 -1.705 8
0.248 0.589 -1.606 7
0.057 0.763 -1.43 10
-0.06 0.923 -1.249 8
-0.05 1.019 -1.071 9
0.084 0.999 -0.836 8
0.075 0.899 -0.753 9
0.335 0.816 -0.444 8
0.58 0.769 -0.167 8
0.721 0.792 -0.055 9
0.794 0.819 -0.146 8
0.803 0.829 -0.337 9
0.722 0.746 -0.468 8
0.661 0.672 -0.422 7
0.568 0.819 -0.467 10
0.486 0.762 -0.287 8
0.445 0.654 0.146 9
0.42 0.548 0.596 8
0.46 0.456 0.892 8
0.414 0.411 0.803 9
0.574 0.356 0.892 8
0.676 0.384 0.827 8
0.561 0.518 0.673 9
0.333 0.715 0.448 8
0.136 0.874 0.202 9
0.123 0.786 0.182 6
-0.056 0.84 -0.041 10
-0.2 0.808 -0.152 9
-0.282 0.723 -0.093 8
-0.355 0.636 0.045 9
-0.42 0.594 0.202 8
-0.454 0.575 0.313 8
-0.438 0.57 0.301 9
-0.394 0.513 0.271 8
-0.331 0.518 0.171 9
-0.271 0.548 -0.037 8
-0.245 0.618 -0.391 8
-0.237 0.658 -0.701 7
-0.242 0.664 -0.823 10
-0.217 0.597 -0.74 9
-0.208 0.616 -0.76 8
-0.168 0.608 -0.707 8
-0.154 0.586 -0.597 9
-0.165 0.579 -0.503 8
-0.155 0.606 -0.483 9
-0.117 0.625 -0.526 8
-0.105 0.563 -0.473 8
-0.034 0.525 -0.539 9
-0.032 0.508 -0.687 8
-0.172 0.559 -0.831 7
-0.313 0.6 -0.83 10
-0.38 0.566 -0.692 8
-0.398 0.461 -0.45 9
-0.358 0.415 -0.405 8
-0.334 0.258 -0.189 8
-0.292 0.101 -0.034 9
-0.259 0.007 0.106 8
-0.231 -0.036 0.27 9
-0.201 -0.09 0.358 8
-0.18 -0.081 0.322 8
-0.162 -0.11 0.282 9
-0.17 -0.079 0.179 7
-0.174 -0.026 0.038 10
-0.181 0.007 -0.092 8
-0.204 0.044 -0.157 8
-0.179 0.054 -0.173 9
-0.161 0.048 -0.155 8
-0.084 0.004 -0.15 9
-0.023 -0.025 -0.135 8
0.015 -0.028 -0.109 8
0.023 -0.025 -0.049 9
-0.001 -0.011 0.081 8
-0.037 0.022 0.204 9
-0.034 0.02 0.184 6
-0.064 0.053 0.237 10
-0.056 0.044 0.306 9
-0.017 -0.005 0.394 8
0.033 -0.049 0.426 8
0.095 -0.059 0.413 9
0.141 -0.038 0.39 8
0.127 -0.034 0.351 9
0.163 0.017 0.29 8
0.182 0.073 0.183 8
0.146 0.128 0.137 9
0.076 0.181 0.188 8
0.068 0.163 0.169 7
0.041 0.154 0.234 10
0.083 0.109 0.253 8
0.137 0.084 0.231 9
0.151 0.084 0.188 8
0.105 0.096 0.148 9
0.019 0.129 0.098 8
-0.055 0.163 0.039 8
-0.05 0.146 0.035 9
-0.093 0.147 -0.002 8
-0.113 0.121 -0.027 8
-0.126 0.092 -0.061 9
-0.137 0.071 -0.069 7
-0.147 0.058 -0.095 10
-0.158 0.062 -0.217 8
-0.142 0.056 -0.195 8
-0.134 0.043 -0.326 9
-0.102 0.008 -0.377 8
-0.055 -0.021 -0.391 9
-0.001 -0.068 -0.394 8
0.04 -0.101 -0.373 8
0.036 -0.091 -0.336 9
0.051 -0.086 -0.291 8
0.044 -0.067 -0.217 9
0.038 -0.03 -0.134 6
0.039 0.003 -0.08 10
0.031 0.029 -0.061 9
0.032 0.058 -0.071 8
0.029 0.052 -0.064 9
0.053 0.068 -0.11 8
0.092 0.074 -0.159 8
0.12 0.086 -0.196 9
0.133 0.109 -0.215 8
0.146 0.118 -0.209 9
0.169 0.108 -0.178 8
0.152 0.097 -0.16 8
0.172 0.086 -0.122 7
0.17 0.086 -0.094 10
0.136 0.11 -0.086 8
0.089 0.15 -0.1 9
0.053 0.178 -0.125 8
0.047 0.16 -0.113 9
0.025 0.161 -0.128 8
0.02 0.15 -0.12 8
0.039 0.129 -0.082 9
0.079 0.089 -0.038 8
0.119 0.053 0.009 9
0.139 0.028 0.041 8
0.125 0.025 0.037 7
0.124 0.012 0.039 10
0.101 0.016 0.022 8
0.052 0.037 -0.009 9
-0.022 0.073 -0.057 8
-0.096 0.107 -0.126 8
-0.143 0.127 -0.177 9
-0.128 0.115 -0.159 8
-0.153 0.129 -0.135 9
-0.159 0.123 -0.051 8
-0.15 0.091 0.119 8
-0.115 0.042 0.303 9
-0.104 0.037 0.273 6
-0.049 -0.014 0.305 11
-0.01 -0.012 0.274 8
-0.001 -0.015 0.132 8
-0.019 0.01 0.003 9
-0.036 0.035 -0.082 8
-0.031 0.041 -0.167 8
-0.044 0.055 -0.281 9
-0.04 0.05 -0.253 8
-0.086 0.087 -0.324 9
-0.112 0.1 -0.258 8
-0.109 0.076 -0.129 8
-0.096 0.045 -0.034 7
-0.081 0.024 0.015 10
-0.072 0.013 0.032 9
-0.065 0.012 0.028 8
-0.07 0.013 0.015 8
-0.089 0.03 -0.045 9
-0.096 0.047 -0.157 8
-0.07 0.045 -0.27 9
-0.023 0.029 -0.341 8
0.018 0.017 -0.366 8
0.016 0.015 -0.33 9
0.036 0.004 -0.313 8
0.02 0.0 -0.223 7
-0.009 -0.003 -0.072 10
-0.022 -0.01 0.037 8
-0.017 -0.009 0.098 9
-0.016 -0.008 0.088 8
0.008 -0.005 0.088 8
0.027 -0.01 -0.025 9
0.025 -0.006 -0.158 8
0.014 0.006 -0.23 9
0.016 0.006 -0.148 8
0.037 -0.006 0.029 8
0.033 -0.006 0.026 9
0.035 -0.013 0.129 7
0.005 0.006 0.153 10
0.003 0.029 0.121 8
0.1 0.022 0.02 8
0.204 0.007 -0.094 9
0.176 0.022 -0.165 8
0.158 0.02 -0.149 9
0.047 0.043 -0.16 8
-0.031 0.043 -0.054 8
-0.067 0.018 0.096 9
-0.083 -0.002 0.191 8
-0.092 -0.012 0.238 9
-0.083 -0.011 0.214 6
-0.094 -0.008 0.225 10
-0.095 0.004 0.205 9
-0.081 0.007 0.176 8
-0.057 -0.003 0.123 9
-0.044 -0.002 0.056 8
-0.05 -0.001 0.049 8
-0.045 0.0 0.044 9
-0.064 -0.003 0.084 8
-0.083 0.0 0.121 9
-0.091 0.014 0.127 8
-0.075 0.034 0.073 8
-0.039 0.031 -0.065 7
-0.016 0.022 -0.235 10
-0.014 0.02 -0.212 9
-0.021 0.024 -0.367 8
-0.022 0.013 -0.535 8
0.004 -0.007 -0.673 9
0.004 -0.004 -0.714 8
-0.033 0.011 -0.6 8
-0.052 0.012 -0.334 9
-0.047 0.011 -0.301 8
-0.027 -0.007 0.018 9
0.001 -0.027 0.242 8
0.019 -0.041 0.271 7
0.015 -0.047 0.15 10
-0.007 -0.044 -0.004 8
-0.007 -0.04 -0.074 9
-0.031 -0.036 -0.066 8
-0.037 -0.05 -0.024 8
-0.019 -0.062 0.11 9
0.008 -0.057 0.262 8
0.026 -0.035 0.361 9
0.028 -0.007 0.411 8
0.025 -0.006 0.37 8
0.015 0.033 0.347 9
-0.002 0.082 0.274 6
-0.012 0.12 0.168 10
-0.005 0.139 0.029 9
-0.011 0.154 -0.089 8
-0.062 0.189 -0.123 9
-0.056 0.17 -0.111 8
-0.137 0.204 -0.016 8
-0.214 0.229 0.126 9
-0.263 0.234 0.232 8
-0.256 0.211 0.303 9
-0.206 0.193 0.295 8
-0.134 0.179 0.219 8
-0.121 0.161 0.197 7
-0.028 0.132 0.108 10
0.073 0.062 -0.001 9
0.179 -0.027 -0.129 8
0.283 -0.097 -0.246 8
0.351 -0.143 -0.337 9
0.316 -0.169 -0.364 8
0.319 -0.152 -0.327 9
0.257 -0.161 -0.291 8
0.169 -0.159 -0.252 8
0.099 -0.153 -0.259 9
0.066 -0.14 -0.312 8
0.06 -0.126 -0.281 7
0.039 -0.11 -0.337 10
0.022 -0.09 -0.354 8
0.014 -0.071 -0.322 9
0.019 -0.062 -0.213 8
0.051 -0.063 -0.018 8
0.095 -0.064 0.145 9
0.124 -0.053 0.214 8
0.112 -0.047 0.193 9
0.125 -0.028 0.183 8
0.148 -0.006 0.114 8
0.159 0.011 0.05 9
0.125 0.024 0.025 7
0.069 0.04 0.034 10
0.01 0.05 0.055 8
0.009 0.045 0.049 8
-0.048 0.049 0.056 9
-0.089 0.053 0.062 8
-0.104 0.061 0.085 9
-0.092 0.053 0.118 8
-0.076 0.032 0.172 8
-0.069 0.018 0.242 9
-0.059 0.016 0.217 8
-0.059 0.014 0.273 9
-0.068 0.018 0.295 6
-0.07 0.019 0.315 10
-0.076 0.027 0.311 9
-0.078 0.039 0.231 8
-0.07 0.035 0.208 9
-0.049 0.042 0.089 8
-0.029 0.032 -0.051 8
-0.023 0.033 -0.207 9
-0.022 0.042 -0.337 8
-0.009 0.015 -0.379 8
0.028 -0.032 -0.313 9
# end
#Thu Feb 26 20:43:56 GMT+08:00 2015 
