# Supplementary material for: Abnormal Gait Behavior Detection for Elderly Based on Enhanced Wigner-Ville Analysis and Cloud Incremental SVM Learning
Source: Hindawi journal article supplement (doi:10.1155/2016/5869238), 2016-01-01
Supplement: f1 [file 5869238.f1.zip › Supplementary Materials/Original Data/Stumbling without fall/original__158.txt]

# Accelerometer Values
# filename:  original__158.txt
# Saving start time: Thu Feb 26 20:44:06 GMT+08:00 2015

# sensor resolution: 0.0095825195m/s^2
#Sensorvendor: KIONIX, name: KX023 Accelerometer, type: 1,version : 1, range 39.240005

# X value, Y value, Z value, time diff in ms
0.073 0.015 -0.544 9
0.006 0.056 -0.511 8
-0.052 0.088 -0.415 7
-0.083 0.109 -0.302 10
-0.074 0.098 -0.272 8
-0.064 0.101 -0.177 9
-0.02 0.079 -0.115 8
0.036 0.031 -0.085 8
0.096 -0.039 -0.067 9
0.135 -0.109 -0.051 8
0.122 -0.098 -0.051 9
0.121 -0.089 -0.045 8
0.108 -0.158 -0.072 8
0.1 -0.15 -0.148 9
0.082 -0.124 -0.233 6
0.061 -0.072 -0.26 11
0.044 -0.024 -0.215 8
0.039 -0.021 -0.193 8
0.037 -0.013 -0.112 9
0.039 -0.023 -0.046 8
0.035 -0.034 -0.028 9
0.034 -0.041 -0.07 8
0.029 -0.037 -0.115 8
0.013 -0.011 -0.112 9
0.012 -0.009 -0.101 8
0.011 0.013 -0.061 9
0.033 0.013 -0.013 6
0.054 0.007 0.022 10
0.06 0.009 0.045 9
0.068 0.009 0.061 8
0.072 0.006 0.074 8
0.065 0.005 0.067 9
0.049 -0.005 0.088 8
0.03 -0.034 0.117 9
0.027 -0.07 0.131 8
0.028 -0.084 0.132 8
0.032 -0.082 0.124 9
0.029 -0.073 0.112 8
0.056 -0.064 0.095 7
0.093 -0.055 0.07 10
0.119 -0.048 0.042 8
0.146 -0.033 0.01 9
0.182 -0.032 -0.049 8
0.219 -0.036 -0.129 9
0.197 -0.032 -0.116 8
0.196 -0.031 -0.175 8
0.15 -0.018 -0.19 9
0.095 -0.005 -0.17 8
0.066 0.001 -0.182 8
0.067 0.017 -0.236 9
0.06 0.015 -0.212 7
0.047 0.043 -0.278 10
-0.001 0.069 -0.32 8
-0.044 0.08 -0.308 8
-0.073 0.07 -0.249 9
-0.096 0.045 -0.149 8
-0.119 -0.004 -0.023 9
-0.107 -0.004 -0.02 8
-0.115 -0.065 0.078 8
-0.098 -0.128 0.092 9
-0.07 -0.192 -0.002 8
-0.057 -0.219 -0.143 9
-0.069 -0.233 -0.241 6
-0.09 -0.226 -0.311 10
-0.081 -0.204 -0.28 9
-0.1 -0.154 -0.36 8
-0.108 -0.124 -0.389 9
-0.11 -0.129 -0.338 8
-0.119 -0.132 -0.216 8
-0.128 -0.135 -0.066 9
-0.123 -0.172 0.077 8
-0.111 -0.155 0.069 9
-0.093 -0.221 0.135 8
-0.077 -0.287 0.072 8
-0.076 -0.334 -0.082 7
-0.085 -0.361 -0.238 10
-0.105 -0.403 -0.299 8
-0.094 -0.363 -0.269 9
-0.141 -0.427 -0.242 8
-0.212 -0.48 -0.089 9
-0.285 -0.511 0.032 8
-0.36 -0.519 0.129 8
-0.472 -0.527 0.155 9
-0.61 -0.551 0.084 8
-0.549 -0.496 0.076 9
-0.651 -0.529 -0.063 8
-0.703 -0.571 -0.213 7
-0.788 -0.631 -0.316 10
-0.856 -0.753 -0.346 8
-1.0 -0.805 -0.305 9
-1.233 -0.657 -0.275 8
-1.109 -0.591 -0.247 8
-1.224 -0.4 -0.17 9
-1.375 -0.125 -0.13 8
-1.661 0.399 -0.204 9
-1.872 0.895 -0.245 8
-1.911 1.169 -0.271 8
-1.807 1.428 -0.263 9
-1.626 1.285 -0.237 6
-1.412 1.523 -0.194 11
-1.087 1.61 -0.078 8
-0.74 1.604 0.225 8
-0.411 1.546 0.619 9
-0.014 1.423 1.035 8
-0.013 1.28 0.932 8
0.538 1.1 1.318 9
1.197 0.813 1.405 8
1.805 0.496 1.108 9
2.24 0.27 0.712 8
2.406 0.177 0.546 8
2.165 0.159 0.491 7
2.139 0.094 0.511 10
2.021 -0.048 0.552 9
1.811 -0.231 0.641 8
1.617 -0.601 0.739 8
1.502 -1.124 0.65 9
1.415 -1.607 0.353 8
1.474 -2.007 0.062 9
1.327 -1.806 0.056 8
1.533 -2.166 -0.105 8
1.749 -2.61 -0.163 9
2.028 -2.978 -0.039 8
2.283 -3.056 0.31 7
2.327 -2.909 0.862 10
2.095 -2.618 1.638 8
1.994 -2.356 1.475 9
1.883 -2.026 2.44 8
1.892 -1.502 3.354 9
2.003 -0.978 4.002 8
2.162 -0.452 4.146 8
2.335 0.243 3.761 9
2.102 0.218 3.385 8
2.058 1.072 2.803 8
1.869 1.688 2.376 9
1.885 1.695 2.41 7
2.086 1.326 2.944 10
2.243 0.807 3.845 8
2.155 0.208 4.784 8
1.939 0.187 4.306 9
1.57 -0.417 4.858 8
1.028 -1.057 4.743 9
0.506 -1.571 4.18 8
0.046 -1.783 3.36 8
-0.475 -1.516 2.382 9
-1.093 -0.885 1.476 8
-0.984 -0.796 1.328 9
-1.445 -0.204 0.642 6
-1.578 0.036 0.22 10
-1.581 -0.017 -0.098 9
-1.582 -0.231 -0.358 8
-1.589 -0.666 -0.461 9
-1.43 -0.599 -0.47 8
-1.487 -0.539 -0.423 8
-1.544 -1.566 -0.338 9
-1.557 -1.979 -0.224 8
-1.593 -2.257 -0.253 9
-1.774 -2.224 -0.541 8
-2.101 -1.925 -0.945 8
-1.891 -1.732 -0.85 7
-2.257 -1.436 -1.223 10
-2.452 -1.215 -1.598 8
-2.422 -1.088 -1.943 9
-2.242 -1.033 -2.221 8
-1.949 -1.103 -2.405 9
-1.578 -1.264 -2.416 8
-1.421 -1.138 -2.174 8
-1.017 -1.308 -2.19 9
-0.684 -1.514 -2.406 8
-0.54 -1.692 -2.831 9
-0.569 -1.67 -3.18 8
-0.512 -1.444 -3.152 7
-0.951 -1.122 -2.725 10
-0.856 -1.01 -2.452 8
-0.848 -0.763 -1.919 9
-0.561 -0.66 -1.42 8
-0.14 -0.595 -0.917 8
0.265 -0.404 -0.571 9
0.52 -0.061 -0.622 8
0.468 -0.055 -0.56 9
0.483 0.323 -0.995 8
0.277 0.624 -1.53 8
-0.046 0.835 -1.778 9
-0.234 0.951 -1.563 6
-0.195 0.931 -1.005 10
-0.024 0.862 -0.356 9
-0.021 0.776 -0.32 8
0.198 0.79 0.187 9
0.36 0.882 0.428 8
0.357 1.127 0.259 8
0.246 1.519 -0.233 9
0.146 1.855 -0.639 8
0.068 2.032 -0.746 9
0.061 1.829 -0.672 8
-0.039 1.911 -0.504 8
-0.2 1.889 -0.178 7
-0.375 1.803 0.067 10
-0.485 1.705 0.122 9
-0.515 1.609 0.049 8
-0.502 1.522 -0.083 8
-0.452 1.37 -0.075 9
-0.383 1.378 -0.295 8
-0.197 1.482 -0.58 9
0.148 1.536 -0.945 8
0.619 1.396 -1.315 8
1.099 1.075 -1.559 9
0.989 0.967 -1.403 8
1.34 0.64 -1.501 7
1.483 0.321 -1.38 10
1.476 -0.011 -0.993 8
1.38 -0.261 -0.506 9
1.242 -0.357 -0.178 8
1.106 -0.358 -0.061 8
0.995 -0.322 -0.055 9
0.868 -0.333 -0.085 8
0.694 -0.343 -0.199 9
0.447 -0.351 -0.299 8
0.167 -0.358 -0.337 8
-0.052 -0.352 -0.31 9
-0.047 -0.317 -0.279 7
-0.2 -0.31 -0.125 10
-0.299 -0.286 0.106 8
-0.344 -0.244 0.295 8
-0.367 -0.189 0.422 9
-0.364 -0.105 0.476 8
-0.342 0.078 0.453 9
-0.342 0.363 0.361 8
-0.308 0.327 0.325 8
-0.358 0.642 0.136 9
-0.427 1.008 -0.173 8
-0.405 1.325 -0.587 9
-0.242 1.419 -0.975 6
-0.035 1.362 -1.038 10
-0.032 1.226 -0.934 9
0.064 1.14 -0.715 8
0.04 1.041 -0.385 8
-0.124 0.949 0.012 9
-0.407 0.875 0.394 8
-0.624 0.81 0.694 9
-0.704 0.743 0.846 8
-0.633 0.669 0.761 8
-0.64 0.639 0.751 9
-0.605 0.652 0.587 8
-0.542 0.619 0.363 7
-0.48 0.523 0.154 10
-0.439 0.421 0.014 8
-0.412 0.326 -0.033 9
-0.371 0.293 -0.03 8
-0.34 0.226 -0.019 9
-0.304 0.181 0.025 8
-0.275 0.148 0.058 8
-0.236 0.111 0.062 9
-0.207 0.065 0.049 8
-0.186 0.014 0.014 9
-0.168 0.012 0.012 8
-0.13 -0.044 -0.053 7
-0.066 -0.131 -0.098 10
-0.006 -0.207 -0.12 8
0.01 -0.204 -0.124 9
-0.007 -0.177 -0.102 8
-0.006 -0.159 -0.092 8
-0.004 -0.172 -0.056 9
0.007 -0.156 -0.011 8
0.001 -0.095 0.023 8
-0.03 0.016 0.018 9
-0.101 0.173 -0.022 8
-0.205 0.375 -0.096 9
-0.184 0.337 -0.087 6
-0.286 0.57 -0.162 10
-0.279 0.687 -0.263 9
-0.119 0.652 -0.419 8
0.156 0.516 -0.565 9
0.465 0.372 -0.664 8
0.68 0.301 -0.723 8
0.612 0.271 -0.65 9
0.694 0.269 -0.664 8
0.683 0.293 -0.596 9
0.625 0.297 -0.454 8
0.542 0.272 -0.198 8
0.488 0.244 -0.178 7
0.428 0.226 0.092 10
0.41 0.199 0.222 9
0.394 0.135 0.192 8
0.343 0.105 0.122 8
0.219 0.13 0.053 9
0.086 0.177 -0.064 8
0.003 0.205 -0.133 8
0.003 0.185 -0.119 9
-0.072 0.178 -0.041 8
-0.16 0.175 0.066 9
-0.232 0.161 0.05 8
-0.28 0.119 0.01 7
-0.313 0.083 0.033 10
-0.331 0.063 0.04 8
-0.298 0.057 0.036 9
-0.296 0.005 0.058 8
-0.287 -0.048 0.142 8
-0.267 -0.076 0.204 9
-0.236 -0.106 0.197 8
-0.232 -0.097 0.152 9
-0.253 -0.026 0.101 8
-0.227 -0.023 0.091 8
-0.241 0.053 0.051 9
-0.209 0.072 -0.018 6
-0.16 0.047 -0.072 11
-0.141 0.028 -0.051 8
-0.14 0.029 -0.01 8
-0.126 0.026 -0.009 9
-0.152 0.07 0.035 8
-0.201 0.132 0.056 9
-0.233 0.181 0.044 8
-0.214 0.223 -0.012 8
-0.145 0.225 -0.127 9
-0.076 0.215 -0.185 8
-0.068 0.194 -0.166 8
-0.017 0.192 -0.21 7
0.024 0.186 -0.287 10
0.065 0.198 -0.328 9
0.116 0.203 -0.344 8
0.157 0.192 -0.352 8
0.166 0.191 -0.336 9
0.149 0.172 -0.303 8
0.13 0.169 -0.285 9
0.08 0.161 -0.269 8
0.002 0.158 -0.234 8
-0.1 0.194 -0.209 9
-0.216 0.221 -0.209 8
-0.195 0.199 -0.188 7
-0.223 0.167 -0.15 10
-0.173 0.103 -0.093 8
-0.116 0.04 -0.046 9
-0.069 0.009 0.091 8
-0.061 0.014 0.276 8
-0.068 0.049 0.395 9
-0.061 0.044 0.355 8
-0.051 0.047 0.41 9
-0.016 0.002 0.451 8
0.038 -0.031 0.453 8
0.113 -0.037 0.376 9
0.189 -0.048 0.239 7
0.221 -0.044 0.064 10
0.199 -0.039 0.058 8
0.165 0.03 -0.117 8
0.085 0.124 -0.255 9
# end
#Thu Feb 26 20:44:09 GMT+08:00 2015-
