# Supplementary material for: Abnormal Gait Behavior Detection for Elderly Based on Enhanced Wigner-Ville Analysis and Cloud Incremental SVM Learning
Source: Hindawi journal article supplement (doi:10.1155/2016/5869238), 2016-01-01
Supplement: f1 [file 5869238.f1.zip › Supplementary Materials/Original Data/Stumbling without fall/original__159.txt]

# Accelerometer Values
# filename:  original__159.txt
# Saving start time: Thu Feb 26 20:44:12 GMT+08:00 2015

# sensor resolution: 0.0095825195m/s^2
#Sensorvendor: KIONIX, name: KX023 Accelerometer, type: 1,version : 1, range 39.240005

# X value, Y value, Z value, time diff in ms
-0.003 0.063 -0.172 8
-0.007 0.079 -0.314 7
-0.016 0.085 -0.43 10
-0.04 0.088 -0.469 9
-0.036 0.079 -0.422 8
-0.078 0.096 -0.372 8
-0.107 0.102 -0.271 9
-0.11 0.092 -0.17 8
-0.101 0.077 -0.09 9
-0.078 0.055 -0.008 8
-0.056 0.03 0.042 8
-0.05 0.027 0.038 9
-0.041 0.005 0.027 8
-0.039 -0.018 -0.012 7
-0.031 -0.041 -0.049 10
-0.007 -0.073 -0.075 8
0.034 -0.115 -0.102 9
0.067 -0.123 -0.147 8
0.06 -0.111 -0.132 8
0.067 -0.071 -0.186 9
0.075 -0.026 -0.229 8
0.112 -0.005 -0.237 9
0.131 0.0 -0.188 8
0.102 0.009 -0.118 8
0.091 0.008 -0.106 9
0.061 0.011 -0.048 7
0.042 0.006 0.0 10
0.014 0.008 0.03 8
-0.01 0.006 0.051 8
-0.007 -0.016 0.062 9
0.022 -0.052 0.066 8
0.019 -0.047 0.06 9
0.056 -0.084 0.056 8
0.081 -0.107 0.043 8
0.079 -0.106 0.032 9
0.048 -0.073 0.027 8
0.021 -0.032 0.026 9
0.019 -0.029 0.023 6
0.002 0.006 0.024 10
-0.018 0.055 0.026 9
-0.026 0.098 0.023 8
-0.02 0.12 0.006 9
-0.004 0.126 -0.025 8
0.007 0.122 -0.035 8
0.001 0.106 -0.013 9
0.001 0.095 -0.012 8
-0.007 0.067 0.013 8
-0.014 0.032 0.029 9
-0.027 0.014 0.035 8
-0.047 0.018 0.029 7
-0.056 0.03 0.01 10
-0.051 0.027 0.009 8
-0.041 0.036 -0.03 9
-0.026 0.036 -0.065 8
-0.01 0.025 -0.061 9
0.01 0.009 -0.048 8
0.034 -0.006 -0.046 8
0.05 -0.016 -0.039 9
0.045 -0.014 -0.035 8
0.039 -0.014 -0.026 9
0.026 -0.001 -0.02 8
0.025 0.014 -0.003 7
0.041 0.016 0.017 10
0.053 0.018 0.012 8
0.053 0.034 -0.005 9
0.047 0.031 -0.004 8
0.052 0.046 -0.01 8
0.06 0.046 -0.004 9
0.078 0.042 -0.029 8
0.11 0.039 -0.107 8
0.153 0.035 -0.21 9
0.137 0.032 -0.189 8
0.187 0.03 -0.17 9
0.192 0.03 -0.37 6
0.139 0.035 -0.392 10
0.068 0.04 -0.345 9
0.023 0.028 -0.216 8
0.011 0.003 -0.069 9
0.009 0.003 -0.062 8
0.008 -0.016 0.03 8
0.016 -0.03 0.056 9
0.025 -0.037 0.012 8
0.029 -0.044 -0.102 9
0.031 -0.051 -0.228 8
0.019 -0.053 -0.332 8
0.017 -0.047 -0.299 7
0.007 -0.058 -0.389 10
0.007 -0.067 -0.416 9
-0.01 -0.066 -0.351 8
-0.034 -0.062 -0.243 8
-0.04 -0.063 -0.177 9
-0.035 -0.06 -0.155 8
-0.031 -0.054 -0.139 8
-0.029 -0.041 -0.143 9
-0.033 -0.026 -0.177 8
-0.038 -0.015 -0.211 9
-0.028 -0.007 -0.231 8
-0.025 -0.006 -0.208 7
-0.001 -0.004 -0.218 10
0.024 -0.007 -0.203 8
0.056 -0.008 -0.171 9
0.091 -0.011 -0.14 8
0.12 -0.021 -0.095 8
0.134 -0.03 -0.046 9
0.141 -0.038 -0.007 8
0.127 -0.034 -0.006 9
0.131 -0.04 0.009 8
0.131 -0.049 -0.011 8
0.125 -0.068 -0.047 9
0.122 -0.091 -0.105 6
0.125 -0.104 -0.163 11
0.117 -0.116 -0.156 8
0.105 -0.104 -0.14 8
0.1 -0.129 -0.072 9
0.115 -0.175 0.027 8
0.137 -0.232 0.14 9
0.157 -0.271 0.245 8
0.169 -0.274 0.291 8
0.152 -0.248 0.25 9
0.126 -0.223 0.225 8
0.093 -0.212 0.129 9
0.075 -0.249 0.005 6
0.029 -0.315 -0.104 10
-0.061 -0.392 -0.137 9
-0.18 -0.475 -0.118 8
-0.162 -0.428 -0.106 8
-0.267 -0.501 -0.043 9
-0.334 -0.543 0.042 8
-0.385 -0.545 0.099 9
-0.432 -0.522 0.141 8
-0.493 -0.483 0.183 8
-0.565 -0.439 0.167 9
-0.508 -0.395 0.15 8
-0.598 -0.358 0.045 7
-0.734 -0.34 -0.109 10
-0.874 -0.351 -0.234 8
-0.995 -0.406 -0.166 9
-1.15 -0.489 0.061 8
-1.302 -0.544 0.186 9
-1.172 -0.49 0.167 8
-1.301 -0.428 0.156 8
-1.39 -0.248 0.047 9
-1.511 -0.089 -0.155 8
-1.603 0.036 -0.308 9
-1.547 0.173 -0.368 8
-1.392 0.156 -0.331 7
-1.24 0.268 -0.331 10
-0.993 0.334 -0.151 8
-0.731 0.383 0.256 8
-0.556 0.44 0.762 9
-0.432 0.571 1.159 8
-0.233 0.758 1.302 9
-0.209 0.682 1.172 8
0.176 0.902 1.02 8
0.704 1.234 0.753 9
1.131 1.618 0.503 8
1.479 1.79 0.23 9
1.825 1.748 0.224 6
2.007 1.575 0.644 10
1.806 1.418 0.58 9
2.049 0.989 1.146 8
2.359 0.418 1.525 9
2.431 0.005 1.739 8
2.277 -0.222 1.936 8
2.056 -0.409 1.962 9
1.85 -0.368 1.766 8
1.678 -0.738 1.513 8
1.582 -1.209 1.048 9
1.736 -1.645 0.598 8
2.074 -2.089 0.294 7
2.324 -2.667 0.08 10
2.474 -3.25 -0.02 8
2.227 -2.925 -0.018 9
2.261 -3.375 0.005 8
2.059 -3.625 0.033 9
1.593 -3.572 0.025 8
0.864 -3.319 0.256 8
0.102 -3.01 0.967 9
-0.51 -2.739 2.051 8
-0.459 -2.465 1.846 9
-0.838 -2.237 2.949 8
-0.983 -1.916 3.63 7
-0.906 -1.414 3.769 10
-0.532 -0.542 3.491 8
-0.084 0.554 2.853 9
-0.076 0.499 2.568 8
0.043 1.593 1.892 8
-0.263 2.532 1.791 9
-0.328 2.822 2.556 8
0.186 2.389 3.685 9
0.725 1.81 4.445 8
0.744 1.286 4.46 8
0.669 1.157 4.014 9
0.343 0.696 3.427 6
0.059 0.306 2.572 11
-0.144 -0.104 1.602 8
-0.404 -0.355 0.478 8
-0.716 -0.433 -0.471 9
-0.906 -0.462 -0.943 8
-0.815 -0.415 -0.849 8
-0.873 -0.446 -0.807 9
-0.772 -0.564 -0.415 8
-0.507 -0.689 -0.114 9
-0.29 -0.78 -0.152 8
-0.298 -0.871 -0.445 8
-0.268 -0.784 -0.4 7
-0.422 -0.853 -0.692 10
-0.693 -0.907 -0.999 9
-0.995 -0.965 -1.391 8
-1.153 -1.023 -1.728 8
-1.181 -1.113 -1.865 9
-1.104 -1.385 -1.681 8
-0.994 -1.247 -1.513 9
-0.861 -1.629 -1.172 8
-0.815 -1.825 -0.83 8
-0.962 -1.724 -0.631 9
-1.245 -1.438 -0.659 8
-1.52 -1.127 -0.882 7
-1.756 -0.82 -1.314 10
-1.58 -0.738 -1.182 8
-1.777 -0.428 -1.753 9
-1.834 -0.126 -2.272 8
-1.716 0.022 -2.514 8
-1.415 -0.111 -2.44 9
-1.018 -0.381 -2.098 8
-0.748 -0.556 -1.56 9
-0.673 -0.501 -1.404 8
-0.631 -0.564 -0.881 8
-0.675 -0.579 -0.487 9
-0.733 -0.581 -0.254 7
-0.822 -0.551 -0.255 10
-0.87 -0.479 -0.492 8
-0.783 -0.431 -0.443 8
-0.699 -0.351 -0.657 9
-0.489 -0.204 -0.702 8
-0.191 0.067 -0.707 9
0.111 0.319 -0.804 8
0.377 0.451 -1.054 8
0.544 0.522 -1.378 9
0.489 0.47 -1.241 8
0.531 0.513 -1.491 9
0.545 0.534 -1.497 6
0.556 0.605 -1.273 10
0.532 0.783 -1.062 9
0.486 1.013 -0.953 8
0.479 1.165 -0.881 9
0.431 1.048 -0.793 8
0.483 1.114 -0.69 8
0.548 1.133 -0.55 9
0.603 1.069 -0.39 8
0.687 0.881 -0.113 8
0.772 0.645 0.249 9
0.695 0.581 0.224 8
0.678 0.464 0.515 7
0.548 0.501 0.667 10
0.385 0.574 0.664 8
0.184 0.609 0.585 9
-0.027 0.655 0.505 8
-0.173 0.73 0.438 9
-0.156 0.657 0.394 8
-0.177 0.675 0.353 8
-0.075 0.559 0.288 9
0.048 0.409 0.22 8
0.096 0.295 0.197 9
0.063 0.215 0.178 8
0.057 0.194 0.161 7
0.001 0.137 0.125 10
-0.038 0.102 0.047 8
-0.039 0.094 -0.123 9
-0.033 0.104 -0.314 8
-0.066 0.146 -0.473 8
-0.119 0.255 -0.613 9
-0.107 0.229 -0.695 8
-0.149 0.206 -0.626 9
-0.147 0.481 -0.615 8
-0.073 0.441 -0.499 8
0.04 0.301 -0.28 9
0.1 0.18 -0.036 6
0.076 0.147 0.14 10
0.068 0.133 0.126 9
-0.022 0.198 0.191 8
-0.196 0.321 0.176 9
-0.381 0.437 0.077 8
-0.486 0.517 -0.121 8
-0.523 0.547 -0.301 9
-0.511 0.538 -0.412 8
-0.46 0.484 -0.371 9
-0.414 0.451 -0.406 8
-0.366 0.405 -0.34 8
-0.329 0.367 -0.158 7
-0.296 0.335 0.109 10
-0.261 0.306 0.343 9
-0.215 0.282 0.438 8
-0.194 0.254 0.394 8
-0.085 0.239 0.302 9
0.1 0.231 0.057 8
0.294 0.24 -0.214 9
0.45 0.285 -0.451 8
0.546 0.353 -0.634 8
0.491 0.317 -0.571 9
0.555 0.374 -0.654 8
0.602 0.403 -0.608 7
0.655 0.435 -0.53 10
0.764 0.472 -0.48 8
0.963 0.424 -0.381 9
1.103 0.414 -0.217 8
0.993 0.372 -0.195 8
1.015 0.461 -0.079 9
1.005 0.48 -0.031 8
1.004 0.409 0.009 9
1.052 0.307 0.09 8
1.044 0.227 0.244 8
0.88 0.205 0.412 9
0.792 0.184 0.371 7
0.611 0.197 0.427 10
0.523 0.146 0.334 8
0.545 0.03 0.172 8
0.57 -0.022 -0.012 9
0.472 0.093 -0.264 8
0.425 0.083 -0.238 9
0.256 0.294 -0.589 8
0.072 0.46 -0.891 8
-0.154 0.665 -1.021 9
-0.408 0.94 -1.027 8
-0.615 1.144 -0.965 8
-0.553 1.029 -0.869 7
-0.655 1.104 -0.671 10
-0.665 1.019 -0.376 9
-0.637 0.828 -0.161 8
-0.622 0.644 -0.029 8
-0.646 0.507 0.072 9
-0.664 0.375 0.141 8
-0.621 0.238 0.154 9
-0.559 0.214 0.138 8
-0.48 0.09 0.088 8
-0.455 0.053 0.007 9
-0.454 0.109 -0.124 8
-0.38 0.105 -0.328 7
-0.273 0.03 -0.466 10
-0.246 -0.046 -0.404 8
-0.221 -0.041 -0.364 9
-0.15 -0.071 -0.179 8
-0.135 -0.062 0.005 9
-0.1 -0.044 0.169 8
-0.053 -0.02 0.302 8
-0.006 0.028 0.39 9
-0.005 0.025 0.351 8
0.044 0.077 0.374 9
0.099 0.106 0.304 8
0.175 0.123 0.128 7
0.261 0.119 -0.068 10
0.29 0.105 -0.206 8
0.24 0.1 -0.245 9
0.216 0.09 -0.221 8
0.103 0.134 -0.124 8
-0.029 0.185 0.066 9
-0.113 0.184 0.243 8
-0.141 0.138 0.33 8
-0.191 0.143 0.354 9
-0.281 0.21 0.318 8
-0.253 0.189 0.286 9
-0.293 0.241 0.183 6
-0.272 0.234 0.061 10
-0.225 0.194 -0.039 9
-0.177 0.156 -0.057 8
-0.15 0.102 0.049 9
-0.135 0.091 0.044 8
-0.093 0.009 0.117 8
-0.009 -0.075 0.084 9
0.071 -0.148 0.009 8
0.121 -0.197 -0.089 9
0.13 -0.188 -0.172 8
0.094 -0.112 -0.221 8
0.084 -0.101 -0.199 7
0.05 -0.027 -0.242 10
0.042 -0.006 -0.221 9
0.045 -0.019 -0.114 8
0.032 -0.008 -0.064 8
-0.02 0.046 -0.021 9
-0.063 0.096 0.032 8
-0.057 0.087 0.029 9
-0.039 0.105 -0.038 8
-0.01 0.105 -0.141 8
-0.012 0.105 -0.189 9
-0.019 0.112 -0.171 8
-0.017 0.106 -0.101 7
0.004 0.08 -0.096 10
0.004 0.072 -0.087 8
0.003 0.074 -0.138 9
-0.006 0.091 -0.204 8
0.012 0.08 -0.305 8
0.041 0.05 -0.401 9
0.042 0.059 -0.418 8
0.038 0.053 -0.376 9
0.013 0.096 -0.307 8
-0.01 0.119 -0.193 8
-0.007 0.121 -0.131 9
0.012 0.131 -0.193 6
0.028 0.155 -0.286 11
0.037 0.174 -0.341 8
0.033 0.156 -0.307 8
0.035 0.175 -0.341 9
0.021 0.197 -0.333 8
-0.002 0.208 -0.277 9
-0.014 0.186 -0.202 8
-0.008 0.147 -0.147 8
0.004 0.121 -0.134 9
0.004 0.109 -0.121 8
0.011 0.113 -0.147 8
0.002 0.134 -0.21 7
-0.013 0.151 -0.282 10
-0.024 0.159 -0.328 9
-0.017 0.159 -0.322 8
-0.015 0.143 -0.29 8
0.0 0.126 -0.216 9
0.002 0.109 -0.103 8
-0.012 0.096 0.0 9
-0.017 0.082 0.065 8
-0.009 0.067 0.086 8
-0.009 0.062 0.09 9
-0.008 0.055 0.081 8
-0.022 0.067 0.073 7
-0.041 0.085 0.06 10
-0.047 0.092 0.057 8
-0.038 0.09 0.069 9
-0.036 0.083 0.07 8
-0.05 0.066 0.049 9
-0.045 0.059 0.044 8
-0.067 0.033 0.061 8
-0.09 0.002 0.116 9
-0.102 -0.026 0.133 8
-0.097 -0.046 0.099 8
-0.071 -0.053 0.044 9
-0.064 -0.048 0.04 7
-0.039 -0.036 -0.011 10
-0.04 -0.005 -0.046 8
-0.054 0.042 -0.08 8
-0.042 0.075 -0.104 9
0.003 0.082 -0.107 8
0.049 0.076 -0.099 9
0.044 0.068 -0.089 8
0.065 0.056 -0.075 8
0.07 0.042 -0.068 9
0.073 0.029 -0.087 8
0.06 0.027 -0.133 9
0.029 0.035 -0.152 6
-0.003 0.04 -0.115 10
-0.003 0.036 -0.104 9
-0.018 0.032 -0.048 8
-0.01 0.018 0.0 9
0.004 -0.007 0.032 8
0.031 -0.04 0.05 8
0.066 -0.062 0.047 9
0.088 -0.075 0.032 8
0.079 -0.067 0.029 8
0.064 -0.062 0.005 9
0.024 -0.035 -0.026 8
-0.014 -0.009 -0.071 7
-0.032 0.007 -0.103 10
-0.03 0.011 -0.08 8
-0.027 0.01 -0.072 9
-0.025 -0.002 -0.01 8
-0.005 -0.022 0.107 9
0.026 -0.035 0.282 8
0.039 -0.031 0.397 8
0.032 -0.007 0.386 9
0.01 0.021 0.264 8
0.009 0.019 0.237 9
0.0 0.036 0.069 8
0.019 0.045 -0.067 7
0.041 0.052 -0.143 10
0.039 0.052 -0.144 8
0.018 0.058 -0.115 9
-0.015 0.071 -0.093 8
-0.014 0.064 -0.084 8
# end
#Thu Feb 26 20:44:16 GMT+08:00 20154
