# Supplementary material for: Abnormal Gait Behavior Detection for Elderly Based on Enhanced Wigner-Ville Analysis and Cloud Incremental SVM Learning
Source: Hindawi journal article supplement (doi:10.1155/2016/5869238), 2016-01-01
Supplement: f1 [file 5869238.f1.zip › Supplementary Materials/Original Data/Stumbling without fall/original__160.txt]

# Accelerometer Values
# filename:  original__160.txt
# Saving start time: Thu Feb 26 20:44:18 GMT+08:00 2015

# sensor resolution: 0.0095825195m/s^2
#Sensorvendor: KIONIX, name: KX023 Accelerometer, type: 1,version : 1, range 39.240005

# X value, Y value, Z value, time diff in ms
-0.037 0.119 -0.315 9
-0.052 0.151 -0.411 8
-0.018 0.136 -0.476 8
0.003 0.117 -0.448 9
-0.002 0.114 -0.329 8
-0.001 0.103 -0.296 9
0.002 0.083 -0.181 8
0.018 0.047 -0.12 7
0.021 0.029 -0.098 10
0.021 0.014 -0.1 8
0.021 -0.01 -0.136 9
0.008 -0.02 -0.161 8
0.008 -0.018 -0.145 8
-0.011 -0.008 -0.119 9
-0.03 0.0 -0.083 8
-0.042 0.004 -0.075 9
-0.053 0.013 -0.06 8
-0.051 0.011 -0.019 8
-0.028 -0.016 0.02 9
-0.025 -0.014 0.018 6
-0.011 -0.042 0.021 10
-0.028 -0.032 -0.02 9
-0.047 -0.011 -0.078 8
-0.05 -0.008 -0.131 9
-0.05 -0.008 -0.189 8
-0.045 0.001 -0.231 8
-0.051 0.001 -0.208 9
-0.058 0.011 -0.201 8
-0.038 -0.007 -0.123 9
0.0 -0.057 -0.011 8
0.019 -0.084 0.072 8
0.017 -0.075 0.065 7
0.029 -0.077 0.108 10
0.057 -0.09 0.117 9
0.096 -0.112 0.102 8
0.113 -0.117 0.08 8
0.089 -0.081 0.075 9
0.045 -0.028 0.089 8
0.011 -0.008 0.088 9
0.009 -0.007 0.079 8
-0.025 0.009 0.059 8
-0.059 0.042 0.05 9
-0.067 0.051 0.056 8
-0.042 0.028 0.053 7
-0.012 0.014 0.037 10
0.008 0.008 0.013 8
0.007 0.007 0.012 9
0.028 -0.006 -0.034 8
0.046 -0.019 -0.102 8
0.056 -0.027 -0.168 9
0.054 -0.036 -0.211 8
0.046 -0.048 -0.213 9
0.041 -0.043 -0.191 8
0.032 -0.067 -0.154 8
0.028 -0.106 -0.109 9
0.031 -0.126 -0.099 7
0.037 -0.125 -0.13 10
0.043 -0.131 -0.169 8
0.051 -0.145 -0.201 8
0.046 -0.13 -0.18 9
0.051 -0.159 -0.179 8
0.049 -0.199 -0.147 9
0.035 -0.221 -0.149 8
0.009 -0.232 -0.178 8
-0.01 -0.269 -0.203 9
-0.017 -0.344 -0.207 8
-0.015 -0.31 -0.186 9
-0.018 -0.399 -0.138 6
-0.026 -0.448 -0.078 10
-0.039 -0.443 -0.076 9
-0.06 -0.424 -0.121 8
-0.092 -0.404 -0.195 9
-0.14 -0.383 -0.254 8
-0.126 -0.345 -0.229 8
-0.181 -0.338 -0.201 9
-0.222 -0.34 -0.113 8
-0.257 -0.342 -0.057 8
-0.303 -0.345 -0.034 9
-0.388 -0.364 0.006 8
-0.349 -0.328 0.006 7
-0.509 -0.369 0.129 10
-0.651 -0.419 0.302 8
-0.721 -0.455 0.421 9
-0.84 -0.47 0.506 8
-1.018 -0.474 0.556 9
-1.159 -0.467 0.521 8
-1.043 -0.42 0.469 8
-1.137 -0.388 0.383 9
-1.165 -0.275 0.3 8
-1.115 -0.182 0.214 9
-0.957 -0.208 0.107 8
-0.849 -0.13 -0.041 7
-0.824 0.172 -0.116 10
-0.742 0.155 -0.105 8
-0.697 0.537 -0.133 9
-0.599 0.856 -0.246 8
-0.323 1.017 -0.305 8
0.044 1.059 -0.224 9
0.266 1.132 -0.066 8
0.357 1.319 0.097 8
0.321 1.187 0.088 9
0.363 1.393 0.206 8
0.368 1.502 0.206 9
0.447 1.511 -0.008 6
0.757 1.362 -0.375 10
1.256 1.048 -0.796 9
1.13 0.943 -0.716 8
1.563 0.553 -1.107 9
1.845 0.177 -1.274 8
2.063 -0.182 -1.083 8
2.112 -0.604 -0.623 9
1.897 -0.966 -0.063 8
1.525 -1.237 0.39 9
1.373 -1.113 0.351 8
1.063 -1.411 0.554 8
0.95 -1.649 0.553 7
1.109 -1.846 0.359 10
1.456 -2.051 0.027 9
1.869 -2.205 -0.27 8
2.229 -2.209 -0.482 8
2.006 -1.988 -0.434 9
2.274 -1.949 -0.404 8
2.441 -1.942 0.21 9
2.46 -1.955 1.48 8
2.322 -1.844 3.127 8
2.069 -1.476 4.831 9
1.75 -0.938 6.287 8
1.575 -0.844 5.659 7
1.235 -0.178 6.594 10
1.021 0.68 6.754 8
1.034 1.455 6.388 9
1.202 1.737 6.047 8
1.469 1.495 6.085 8
1.322 1.346 5.476 9
1.588 0.747 5.905 8
1.721 0.074 6.302 9
1.664 -0.493 6.27 8
1.523 -0.884 5.59 8
1.3 -1.056 4.365 9
1.17 -0.951 3.929 7
0.678 -0.916 2.411 10
-0.057 -0.647 0.882 8
-0.869 -0.301 -0.39 8
-1.575 -0.081 -1.328 9
-2.05 -0.047 -1.781 8
-2.342 -0.262 -1.732 9
-2.41 -0.722 -1.443 8
-2.169 -0.65 -1.299 8
-2.027 -1.197 -1.023 9
-1.762 -1.642 -0.887 8
-1.539 -1.999 -1.087 9
-1.449 -2.212 -1.496 6
-1.498 -2.186 -1.908 10
-1.348 -1.967 -2.249 9
-1.553 -1.77 -2.024 8
-1.81 -1.662 -2.341 8
-1.995 -1.498 -2.626 9
-2.053 -1.39 -2.703 8
-1.945 -1.373 -2.595 9
-1.772 -1.434 -2.434 8
-1.595 -1.29 -2.19 8
-1.45 -1.371 -2.095 9
-1.246 -1.455 -2.175 8
-1.026 -1.533 -2.523 7
-0.855 -1.529 -2.924 10
-0.724 -1.418 -3.244 8
-0.63 -1.235 -3.607 9
-0.567 -1.112 -3.246 8
-0.482 -0.917 -3.603 9
-0.356 -0.749 -3.716 8
-0.21 -0.654 -3.56 8
-0.059 -0.589 -3.267 9
0.025 -0.479 -2.842 8
0.017 -0.312 -2.263 8
0.016 -0.281 -2.037 9
-0.045 -0.077 -1.524 7
-0.153 0.206 -1.1 10
-0.238 0.67 -0.777 8
-0.242 1.268 -0.685 8
-0.17 1.779 -0.661 9
-0.153 1.601 -0.595 8
-0.087 1.84 -0.431 9
-0.145 1.757 -0.051 8
-0.357 1.548 0.554 8
-0.642 1.332 1.269 9
-0.849 1.156 1.876 8
-0.91 1.126 2.198 9
-0.819 1.013 1.978 6
-0.793 1.126 1.869 10
-0.71 1.373 1.308 9
-0.61 1.627 0.62 8
-0.565 1.822 0.086 9
-0.588 2.069 -0.208 8
-0.59 2.18 -0.134 8
-0.531 1.962 -0.121 9
-0.462 1.709 0.403 8
-0.304 1.253 1.177 9
-0.076 0.876 1.816 8
0.144 0.638 2.157 8
0.13 0.574 1.941 7
0.472 0.525 1.812 10
0.425 0.473 1.63 9
0.636 0.523 1.008 8
0.893 0.63 0.206 8
1.104 0.712 -0.587 9
1.189 0.701 -1.161 8
1.172 0.587 -1.449 8
1.055 0.528 -1.304 9
1.016 0.344 -1.364 8
0.951 0.14 -1.21 9
0.853 -0.025 -0.902 8
0.796 -0.238 -0.61 7
0.848 -0.501 -0.477 10
0.947 -0.679 -0.495 8
0.852 -0.611 -0.445 9
0.839 -0.664 -0.576 8
0.641 -0.576 -0.909 8
0.327 -0.287 -1.381 9
0.003 0.046 -1.737 8
-0.182 0.219 -1.812 9
-0.187 0.2 -1.587 8
-0.168 0.18 -1.429 8
-0.059 0.017 -1.07 9
0.072 -0.195 -0.628 6
0.138 -0.362 -0.139 11
0.142 -0.417 0.289 8
0.094 -0.331 0.614 8
-0.038 -0.1 0.72 9
-0.035 -0.09 0.648 8
-0.203 0.164 0.435 8
-0.362 0.378 -0.026 9
-0.508 0.649 -0.504 8
-0.593 0.986 -0.832 9
-0.602 1.326 -1.031 8
-0.542 1.193 -0.928 8
-0.454 1.403 -1.049 7
-0.239 1.304 -1.131 10
-0.006 1.059 -1.131 9
0.052 0.852 -0.912 8
-0.073 0.694 -0.445 8
-0.245 0.574 0.085 9
-0.221 0.516 0.076 8
-0.383 0.43 0.458 9
-0.518 0.349 0.646 8
-0.592 0.292 0.687 8
-0.604 0.294 0.636 9
-0.565 0.324 0.522 8
-0.509 0.291 0.47 7
-0.442 0.309 0.383 10
-0.362 0.299 0.405 8
-0.28 0.267 0.488 9
-0.197 0.222 0.561 8
-0.104 0.175 0.588 8
0.01 0.115 0.561 9
0.009 0.104 0.505 8
0.131 0.043 0.471 9
0.224 0.015 0.43 8
0.308 0.022 0.317 8
0.399 0.031 0.153 9
0.483 0.015 -0.006 7
0.541 -0.017 -0.154 10
0.487 -0.015 -0.139 8
0.465 -0.027 -0.283 8
0.362 -0.011 -0.444 9
0.248 0.0 -0.567 8
0.166 -0.021 -0.581 9
0.121 -0.057 -0.485 8
0.084 -0.072 -0.36 8
0.076 -0.064 -0.324 9
0.043 -0.032 -0.283 8
0.019 0.033 -0.381 9
0.022 0.082 -0.529 6
0.063 0.104 -0.622 10
0.108 0.111 -0.658 9
0.13 0.122 -0.622 8
0.117 0.11 -0.559 9
0.134 0.115 -0.475 8
0.15 0.104 -0.35 8
0.106 0.109 -0.136 9
0.0 0.137 0.134 8
-0.1 0.188 0.371 9
-0.09 0.169 0.334 8
-0.146 0.243 0.456 8
-0.192 0.329 0.418 7
-0.223 0.419 0.254 10
-0.178 0.471 0.028 8
-0.073 0.474 -0.19 9
0.025 0.437 -0.322 8
0.023 0.393 -0.29 9
0.09 0.312 -0.299 8
0.122 0.235 -0.098 8
0.14 0.158 0.244 9
0.179 0.017 0.488 8
0.18 -0.072 0.614 9
0.087 -0.026 0.704 8
0.078 -0.023 0.633 7
-0.042 0.071 0.659 10
-0.092 0.097 0.55 8
-0.09 0.141 0.387 9
-0.058 0.199 0.173 8
-0.034 0.216 -0.053 8
-0.059 0.223 -0.233 9
-0.053 0.201 -0.21 8
-0.064 0.188 -0.333 9
-0.064 0.145 -0.316 8
-0.125 0.114 -0.156 8
-0.243 0.177 0.034 9
-0.219 0.159 0.031 6
-0.276 0.203 0.077 11
-0.223 0.164 -0.079 8
-0.132 0.138 -0.347 8
-0.068 0.157 -0.547 9
-0.051 0.19 -0.609 8
-0.063 0.201 -0.593 8
-0.092 0.186 -0.551 9
-0.083 0.168 -0.496 8
-0.154 0.222 -0.455 9
-0.217 0.315 -0.431 8
-0.207 0.33 -0.429 8
-0.173 0.295 -0.407 7
-0.152 0.264 -0.345 10
-0.125 0.246 -0.316 9
-0.113 0.221 -0.284 8
-0.079 0.219 -0.343 8
-0.064 0.229 -0.447 9
-0.064 0.259 -0.531 8
-0.059 0.281 -0.562 9
-0.047 0.27 -0.498 8
-0.042 0.243 -0.448 8
-0.031 0.219 -0.271 9
-0.008 0.181 -0.077 8
-0.009 0.134 0.031 7
-0.076 0.132 0.086 10
-0.104 0.129 0.107 8
-0.064 0.09 0.089 9
-0.058 0.081 0.08 8
-0.021 0.055 0.057 8
0.003 0.043 0.023 9
0.021 0.044 0.01 8
0.035 0.054 0.03 9
0.041 0.053 0.044 8
0.033 0.053 0.06 8
0.029 0.047 0.054 9
0.006 0.043 0.125 7
-0.012 0.027 0.288 10
-0.011 -0.014 0.436 8
0.0 -0.071 0.476 8
0.003 -0.092 0.436 9
0.003 -0.082 0.364 8
-0.006 -0.074 0.328 9
-0.023 -0.039 0.235 8
-0.044 0.001 0.112 8
-0.062 0.043 -0.017 9
-0.065 0.072 -0.102 8
-0.047 0.08 -0.137 9
-0.042 0.072 -0.123 6
-0.018 0.059 -0.141 10
-0.008 0.051 -0.141 9
-0.023 0.051 -0.132 8
-0.054 0.051 -0.125 9
-0.083 0.059 -0.115 8
-0.101 0.066 -0.1 8
-0.091 0.059 -0.09 9
-0.086 0.051 -0.083 8
-0.078 0.047 -0.078 8
-0.086 0.052 -0.075 9
-0.074 0.055 -0.084 8
-0.067 0.05 -0.101 7
-0.03 0.039 -0.122 10
-0.027 0.035 -0.109 8
-0.01 0.035 -0.143 9
0.015 0.025 -0.193 8
0.029 0.021 -0.26 9
0.01 0.03 -0.295 8
-0.017 0.037 -0.246 8
-0.015 0.033 -0.222 9
-0.023 0.03 -0.114 8
-0.013 0.019 -0.014 9
-0.004 0.014 0.031 8
0.002 0.007 0.035 7
0.006 -0.005 0.028 10
-0.005 -0.015 -0.013 8
-0.004 -0.013 -0.011 9
-0.032 -0.014 -0.091 8
-0.068 -0.003 -0.139 8
-0.071 0.001 -0.179 9
-0.037 -0.007 -0.218 8
-0.014 -0.028 -0.208 8
0.001 -0.036 -0.086 9
0.0 -0.032 -0.077 8
0.023 -0.034 0.067 9
0.055 -0.05 0.128 6
0.074 -0.047 0.152 10
0.056 -0.018 0.157 9
0.036 0.012 0.136 8
0.036 0.029 0.103 9
0.032 0.026 0.093 8
0.03 0.035 0.076 8
0.022 0.043 0.084 9
0.021 0.04 0.113 8
0.021 0.036 0.149 9
0.009 0.041 0.161 8
0.008 0.037 0.145 8
-0.006 0.045 0.111 7
-0.003 0.049 0.038 10
0.01 0.054 -0.088 9
0.018 0.06 -0.235 8
# end
#Thu Feb 26 20:44:21 GMT+08:00 20153
