# Supplementary figures and images for: Abnormal Gait Behavior Detection for Elderly Based on Enhanced Wigner-Ville Analysis and Cloud Incremental SVM Learning
Source: Hindawi journal article supplement (doi:10.1155/2016/5869238), 2016-01-01

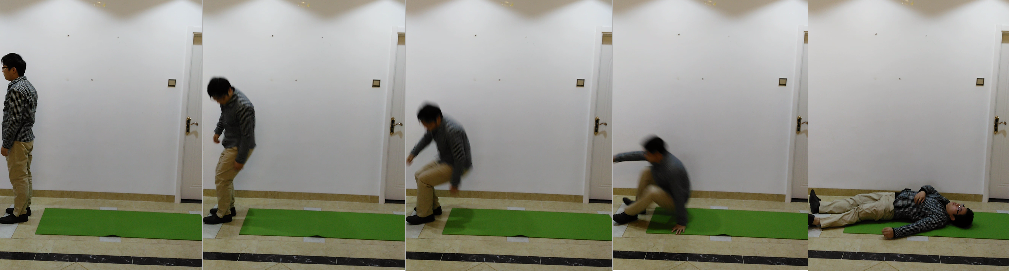

Supplement: f1 [file 5869238.f1.zip › Supplementary Materials/demo frames/Backward Fall.png]

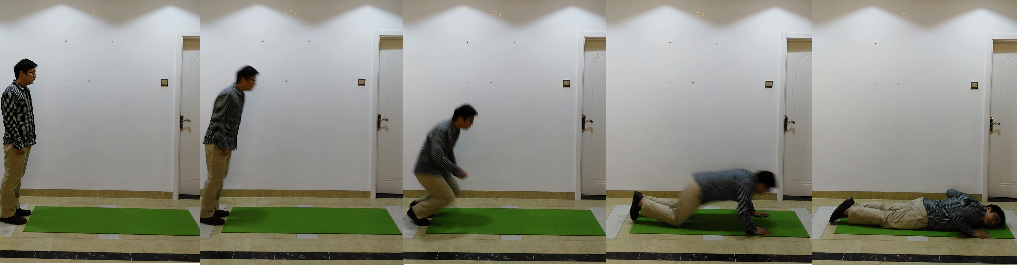

Supplement: f1 [file 5869238.f1.zip › Supplementary Materials/demo frames/Forward Fall.png]

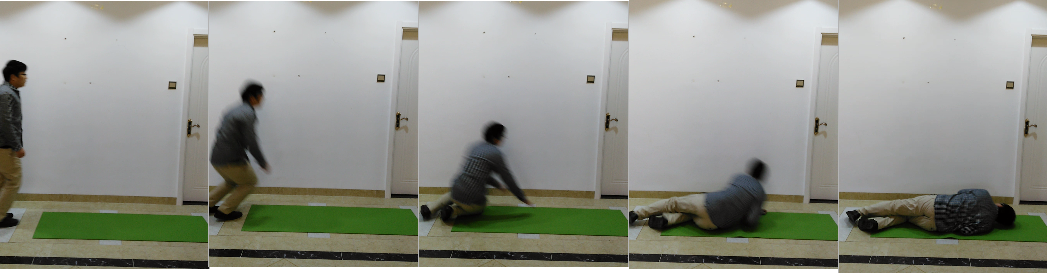

Supplement: f1 [file 5869238.f1.zip › Supplementary Materials/demo frames/RightWard Fall.png]
